# Supplementary material for: Short read Illumina data for the de novo assembly of a non-model snail species transcriptome (Radix balthica, Basommatophora, Pulmonata), and a comparison of assembler performance
Source: BMC Genomics. 2011 Jun 16;12:317. doi: 10.1186/1471-2164-12-317 (PMC3128070; doi:10.1186/1471-2164-12-317)
Supplement: Additional file 3 — Microsatellite repeat motifs obtained from NGEN contigs. List with NGEN contigs containing di-, tri-, tetra-, penta-repeat motives with a minimum repeat length of six, contig ID, repeat type, size, position and contig sequence. [file 1471-2164-12-317-S3.XLS]

## Sheet: di-repeats
ID	SSR type	SSR	size	start	end	sequence
Contig1005 1388 reads, 673 bases	p2	(TG)7	14	651	664	AAAAAAAATAGGGATAACAGGGTAATACTAGATCTGTGACAGTAGCAAGTCAATCAATACAATATGCTGTTTAAATTGAGTTGTGTCTTTCTCTTCAGTGTCTGCCTGAATGTCTCTGTGCAGCAAAGACCTGACTACTGCAACCTAAACACAGAGCCCGGACCTTGCGATGCCTACTTTGTAATGTACTACTACAACCCTGCTGTCGGCTTCTGTCAACAGTTTGTTTATGGCGGGTGTGGTGGAAACAGGAACCGGTTTACCAGTGGCTCAGAGTGTAACACGGCATGTCAGACTAACGCTGTCCTAAACACTGCTATTTGAAGGCAGACACTGGTACCGGTCAAGGGATCTCTTTCAGGTACTACTACGACTCAAAGCTCAAAGCCTGCAAACTCT…
Contig102 7275 reads, 631 bases	p2	(TG)9gggtgagggaagagagacaaaagg(GA)5	52	410	461	CAAAAACCTAAMAAAAAAAAAAAAAAAAATAGGGATAACAGGGTAATGTGTTTTTTCCCTGTTTAAATACCAATACTATATGTATGAGTAAATCGGCCGATCAATTCAGTTTATTCACAGTAAGCAACGCACGAAAATGAAGTTCATTATTCTACTTGTATGTGTAGCCATCTTGTGTTTGTACCAGGTATACGGTGCCGCCATACAATGTATTCCGAGTGGAATAATGTGCTTAGTCGACCCATGCGCATTAACTCTATGCGCACCAGACTACGTCTGCACGAGCTGTAACTGTAGGGCAAGTTGTTTGATGCGCGGCGCACTTTGAATCATCTCCCTTAGATTGAAGTTTTTACATGGGTCTGTGTTGGAACAGAGGAGAGGACCAAACAGAATACT…
Contig10275 244 reads, 332 bases	p2	(TG)7	14	134	147	GATCTGGGTAATTAACATATGAATTATTTCCCTTGCTCAAAGTGTCAGAGGTCAAAAGTCACGAAGGCCGTACCGTGCAATACTCAGGGGCGTGGACTGTACTCTGTCACGTCCCACATTTTTTATTTTACTCTGTGTGTGTGTGTGTATGTGAAATAAAATATTCGTGTGTTTGATGATGTGTTGGACAATTGTAAGATGATTTGGGACCCAGTGGTTACTTTCGGTAAAATTCCTTACAAAAAGCTAGTACAAACAATTGAGTTTTCATTACATGGGTCGTTGTCAATTTTTAGTTCACAAAGGCCCCCCCCCCTTTTTTTTTTCACACT
Contig10438 684 reads, 1252 bases	p2	(GA)7	14	881	894	GTAATAACCAGCCCCTGCTGCCAAAGGCCTCGACATTGAAGCTGTAGGAACCATCAATGGGACACCGGTTTATGATTTTGATCTGAATACACTTAGCACTGAGGACATGCCATGGAGAAAACCTGGTGCCGACATTACCGATTATTTTAACTATGGCTTCACGGAGGAGACATGGAAGGCATATTGTGAAAAACAAAAAATCCTCCGAGCCGAGGCAACAGGAGGAATATCTGTTCTTCCCACATCATTACCTAGATATACAAACTCGATAATTCCGTTATCTCATGTAGATAAAGTTATTCCCTCCCCTGTTTCTCAAAGTTCATCCATCAGTACCATCAATACAAATAACAGCAGTGGCAATAATAACATCATTACCATTGGTGTCATTGGTGGCAG…
Contig1056 83 reads, 218 bases	p2	(CA)6	12	176	187	TCCCTATTTTTTTTTTTTNTTGCAACTTTTTATCTTCAGATAATTTAATGTTTTTTGCATGTTTACAAATGTGATTATGTGGGATAAAAGTCTTTTAACTTTTGTTCAAGCCAGATGCAAGTTATAATTACATTAAAGGCCAGACTTTCCCGGCTGGGTCCTGCAGATCGTGAGGCACACACACACATACACTAACGGTATATCTGTCWTCGGAAGAG
Contig10618 288 reads, 667 bases	p2	(TG)6	12	541	552	TTTTACTTAATCACAACACAGGGTCTATCACAGTCTTGTTCCACTAGAGTTTCTTACCACAAAGTACATAAGAGCTCACTACCATACGGTACATGTGTGTACACCAGACCTTCCTTCCACACAGTACAGGTGTGTACACCAAACCTTCCACACAGTACAGGTGTGTACACCAGACCTTCCACACATTACAGGTGCATACACCAAACCTTCCACACAGTACAGGTGCATACACCAGACCTTCCACACAGTACAGGTGTGTACACCAAACCATCCACACAGCACAGGTGTGTACACCAGAGCTCCCTACCATACTGTACAGGTGTGTACACCAGAGCTCCCTACCATACTGTACAGGTGTGTTGGGACACCATAGGGGATCCAGTCGGACACTTGAAAGTT…
Contig11101 275 reads, 685 bases	p2	(TG)6	12	591	602	GGGTAATCCATCCATGACTGACCACTGATATCCWTCTCTGACTGACCACTGATATCCATCTCTGACTGACCACTGATATGCATTTCTTCCTGAACACTGATATCCACCTGTGACTGACCACTGATATCCATCTATGACTGACCACTGATATCCATCTCTGACTGACCACTGATATCCATCTCTGACTGACCACTGATATCCATCTCTGACTGACCACTGATATCCATCTATGACTGACCACTGATATCCATCTCTGACTGACCACTGATATGCATCTCTTACTGACCATTACAAAAGTCTATTAGCTGAGTTACACAATTCAGATGCTGTAATGAACACAGACAATTATCTTTACCAGCAAACTAGAATACATGTACTTAGAACTAATGAAAAATCTAA…
Contig11143 299 reads, 744 bases	p2	(AT)6	12	14	25	TCCCTCTATAAACATATATATATATTCATTTGTGTAGGCAACAAAAAGATAAACCTCCAAAAGTATGTACACAAATCTATGTATTTACAAGTAACATTTTCTAATCATGAGGTCATACTGAACAGGGGAACAAAGAGAATAAAGGTGCAGAACCATTTTAATACACGGTCAACAGATTGGTTTTTTAAACTATGAAACAAAATGTACAAGTATTTACAAATGAATGGCAAGCCTTTCTTATGGCTGCCTTACATAATACAACAACAAAAGATTTAACCTGTTAAATAAGTAAATAAGATCATACACCAATTAGAACAGTAGTGAAAGAATCCCAGTGAAAAAATGTGCAATGACATCACCACCAGTGAAGATGAGCAATGATATCGCCGTCAGTGAAGA…
Contig11283 46 reads, 114 bases	p2	(GT)10	20	70	89	GAACCGCTCTTCCGMTCTKYCGAGTCTCCCATTTAATAATCTCCGGCATGATTGTGAGTGTAAGTTTTAGTGTGTGTGTGTGTGTGTGTTTGTGTGTTTGTGTGATCTAGCAGG
Contig1133 99 reads, 264 bases	p2	(CT)5cccttttgtctctcttccctcaccc(CA)9	53	44	96	TTTTTTTTCATTTGAAAATTTGTTTTTAATTNAATTCCAGCTGCTCTCTCTCTCCCTTTTGTCTCTCTTCCCTCACCCCACACACACACACACACATTTTCTTTGCAGTATTCTGTTTGGTCCTCTCCTCTGTTCCAACACAGACCCATGTAAAAACTTCAATCTAAGGGAGATGATTCAAAGTGCGCCGCGCATCAAACAACTTGCCCTACAGTTACAGCTCGTGCAGACGTAGTCTGGTGCGCATAGAGAAAGATTCAGATG
Contig11501 59 reads, 205 bases	p2	(TA)5cgctagtacataaacgtattgc(TA)5	42	33	74	GGTGGGTGGGACCGGTGCAGCTAGTACATTGCTATATATATACGCTAGTACATAAACGTATTGCTATATATATACACTAGTACATAAACGTATTTTTGTTTTTATAAGCTAGTACATACCTAAATTTATTGCTGTCTACAGGCTACTTGAGTACAATAAATTATCGCTGTCTACTTCCGTTGGTATATAAACATATTGCTGTTTA
Contig11583 410 reads, 699 bases	p2	(AT)6	12	302	313	GCAAATTATAGTGTTTTATTAATTTAACAAGTATGAGCTAAGTTTCATCTAAGATAACAGTAATGATGAAAATCAAGTTTTAATAAGAAAGCAGTAATTTATTTATTTTGCTTTTTATATGAATTGTTCCAAATAAGATTGATATTAAGACTAACACTCATATTTCTGTTTTAAATACTAAGGGAAAAAAATAAATACAGTGTCAATAAATATCTAATACTCTTTAGTCAACAGTGACTCATCCATTCAACCCACAACTTTCATAGATTCATAGGAATTACAACAGTCACCAAAATTTCAAATATATATATATCTATATTAAAAAAGTAGTTTGTCCAGATATCCTGTAGTAAGACACAGTAACCTCCAAGCTAGTTCCGTTGTTTGTTATTTAGTAGC…
Contig11684 142 reads, 152 bases	p2	(AC)7	14	59	72	AAAAAAAAAATAGGGATAACAGGGTAATATTGCATTATCCTCGTTGACGCGCAGCACAACACACACACACACATACAACCGACGACTCGACCCGCGTACACAACATTAAATTATGGCTCGTACGAAACAAACAGCACGAAAATCGACTGGTG
Contig11696 147 reads, 371 bases	p2	(CA)11tcacttaactagatagatgttcctcacctccactaatccaat(CA)8tcacttaactagatagatgttcctcacctccactaatccaat(CA)8	138	194	331	GATGGTTGACTAGAAATGATGGTTGACTAGAAATGATGGTTGACTAGAAATGACTGATTGTATGGTAGGACTAGTGTGTGTCTAGCGTTTTTTCACAATGCAAATAATGTACATGTATTTCAAGAAATACTGTAAATGAACTTCCAGAAATTCCAGAATACACTTGTGCGACAACCACCTCCACTTATCCAATCACACACACACACACACACACATCACTTAACTAGATAGATGTTCCTCACCTCCACTAATCCAATCACACACACACACACATCACTTAACTAGATAGATGTTCCTCACCTCCACTAATCCAATCACACACACACACACATCACTTAACTAGATAGATGTTCCAGATCGGAAGAGCGGTT
Contig11706 121 reads, 469 bases	p2	(CA)9ccatgtcaacatacat(AC)5catgtcracat(AC)6catgtcaacat(AC)7catgtcaacat(AC)6catgtcaacatacat(AC)5catgtcaacat(AC)6catgtcgacatacacacagaacatttccttttacaatgtccttcctatttacactctgttctg(CA)7	240	79	318	GCTAGGGATAACAGGGTAATCGACATACACACAGAACATTTCCTTTTACAATGTCCTTCCTATTTACACTCTGTTCTGCACACACACACACACACACCATGTCAACATACATACACACACACCATGTCRACATACACACACACACCATGTCAACATACACACACACACACCATGTCAACATACACACACACACCATGTCAACATACATACACACACACCATGTCAACATACACACACACACCATGTCGACATACACACAGAACATTTCCTTTTACAATGTCCTTCCTATTTACACTCTGTTCTGCACACACACACACACCATGTCAACATGCTCCATGTCCTGCCCATGTGCAACAGATAGATACAATACCTTACCTCTAATCCTTGTCATACATAGAC…
Contig11873 520 reads, 1325 bases	p2	(CT)13	26	180	205	TTTTTTACGGGTTTGTTTTATTTGTGCTGAACAGTAAAAGAACATTAATACNTGGTNGNAAAGGGAAGCAATAACACCAGTTTAACTGACGCTTCTAATAATTCTGATAGAGACTTTGTTTTATTCGAGAAAAAAAAATATTTTTAGTCAGATCTCAAGCTACTCGACCTTCTCTCACACTCTCTCTCTCTCTCTCTCTCTCTCTCCATCTTTCTCTCTCACACACACTTATTCTGCGTTATCATGACGAACAGAGTTCGGGGGCGGCGCTTCTCATTGTCGCCTCTGTGATTAGCCAGCCAACATCAGATCCGCACAGCCATCAAGTTTCTTTTGTAAAATAGTACAGTAAGTAGCATTGGTGGAAGATCTGTGTCCTCAGCAAGAGCGAAGATGGCC…
Contig11917 355 reads, 410 bases	p2	(AC)6	12	144	155	CCCTGTTATCCCTATTTTTTTTTTTTTTTTTACTCACAAAATAAGTTTTTAATATGCCACAAACCAACTAATACAAGGACTTCATCACAATCAACAAGCAACTGTCAGAGATCCTCTCAACTTCGGCCACTCAACAGAGACAGACACACACACACTTCCATTCATTAGTACCCGGTAACAGATGGGAACTTTAGCCAAGATTAAGTTTTAATTTGTGTAGGTGGGTTTCCTGTTTAATAAAGTCCCTATAGGACAGCTGTAATTCTAACTAGTCATGTCCAATTTCATTTTCATGAAAAATCGGACAGGCTTTGAAAATAAATAAAAACGAGAAACCCATTATTTGGCCTCAAGTATATTTTAAAAAAAAAAGTGATCATGGAATCAGAATTTCTGTCC…
Contig1192 915 reads, 482 bases	p2	(TC)6	12	81	92	CTGTTATCCCTATTTTTTTTTYTTTTTTGCCATTTGATTTTCTTTCAATATATCTTTATTTGTATTATCTGAAATTATTTTCTCTCTCTCTCAAATTCTCAGAGAATAAAACATCATAAGTGCTGAAATAAAATAGCTTTAAACCTCAAACTCCGCCAATACTGGTGTACAGAAATGTAAGGGGCAAGAGTAAGTTCAGGCACAACAACGAGGTGATAAGCTGGTGCTAGTGGTACATCGCATACTGGTGGGGACATTCATGACACTGCACACACAATTAGTGGCAACATTCATGACACAACTAGTGGGGACATTCATGACACAACTAGTGGGAACATTCATGACACAACTAGTGGGGACATTCATGACACTGCACACACAATTAGTGGCAACATTCGT…
Contig1193 2400 reads, 581 bases	p2	(TG)8	16	103	118	CGCGCGCGTGGGGGGGGGGACTTTGACATATGACACCTTGCCGTACGACATCTTAGATTTTGGTTATTTCTAAACTTCTCTTTGAGCACACTTGTGCGTGTATGTGTGTGTGTGTGTGATTGTAGGTGCGTGCGGGTAGTGGAAATGTATGTTTGTTGGTTGTGTATGTGTCACATGGAGCTGTAGTGCGTTAAAGTGGCTTTAGACGTGTCCTGTCCTCCGTTTGTTAACACTTTAGGGCTCCTTGTGGCCTTGACATCGATTGAGACACTCTTCGTAGTGCTCGCCACACATGTTTGTTGGAATCATTGAGAACAAGAAGCTTGGCCTGTCCATGAAGCAGCGGTGCGTCATTTGACACTGTAGCTGGCAGTTAGCCCGGCGTTCACACGTGGCGGC…
Contig1196 31 reads, 233 bases	p2	(AC)7tatacacacacg(CA)5tacacacacg(CA)5	56	112	167	GTCTCGGCATTCCTGCTGAACCGCTCTTCCGATCTCTTTTGTTCAAGCCAGATGCAAGTTATAATTACATTAAAGGCCAGACTTTCCCGGCTGGGTCCTGAAGATCGTGAGACACACACACACACTATACACACACGCACACACACATACACACACGCACACACACATACACACATGCACACACATACACAAACACACATACACACRAACATACATACTAACATGCACATAAA
Contig12662 15 reads, 211 bases	p2	(TG)7	14	10	23	GGTAATCTCTGTGTGTGTGTGTGTTCAATAGAAACGCAACAATTTATTCAAGCATCGTAGGAATACTTTATTTATCCCATGCTTATCATCATATATGCAGCCACAGACGAAATTCCCACTTCTGAAATGTGGTTTGTGTATACATTGAATCATTCTGTTGAAACACGATCACAAAGCCAGATCGGAAGAGCGGTTCAGCAGGAATGCCGAG
Contig12702 318 reads, 428 bases	p2	(TC)10	20	121	140	CGCATCCCTTCATGTAATAATTATGAATAAAATAATTTTTAAAAATGTTTTTGAGCTCCGAGAAACAAACCCGATGTAACTTTTGACATGCAAAAAATGTAATGTCAGATATTTGTTTATTCTCTCTCTCTCTCTCTCTCACTCTCCGTTGTACTCCAGAAGACAGTAGCTCACATCCCCACATGTTATTTGCTCTCTGTAAATATCTCCCTAAATCAATTGTAAGATTCGCCAGTTCAAATTTATTCCGACAGCACGGTGGTTCGTACTAAAACCTCCGTCACAGCATACGGGTCGCAGTTGGATGATGGTCTTCTGTCTTCCAGATAGCCACTCCTGTCCTCGGCCACCTGGCGGGGGATCCTTATACTTGCTCCACGATTGGCCACTCCGGCAGAG…
Contig12751 49 reads, 172 bases	p2	(AC)5agcctggtatca(AC)5agcctggtatca(AC)5agcctggtatca(AC)5agcctggtatca(AC)5agcctggtatca(AC)5agcctggtatca(AC)5agcctggtatca(AC)5	164	9	172	CGATTACAACACACACACAGCCTGGTATCAACACACACACAGCCTGGTATCAACACACACACAGCCTGGTATCAACACACACACAGCCTGGTATCAACACACACACAGCCTGGTATCAACACACACACAGCCTGGTATCAACACACACACAGCCTGGTATCAACACACACAC
Contig12835 126 reads, 518 bases	p2	(AC)6	12	134	145	TTCCACACGGTGTCACCTTGTCACATAGNAGCTCNCCNATGACCNGTAAGATGAGTGGCATGCAAAAGGTCAAGGTCACCTACATGCACATTTTAGTTGTAGTTGTGAAGCCAGATGTCTTGAAAAAAAAACAACACACACACACTACTGTCCTGTCGCGTAGAAAAGGGAATTCGGAGGGAGCGGTTCAGGAAAGAACGCAGCTTTCTTACATGGAAGTGTGCTAGAACGTCATTTGTGGACTAAAAAATGGGCCCACCTGAGTGGGATTAATGTTATACAAGCCACTTTGTCCGCTCATTATTAAAAATAAAAAAGAACAAAAATATAAAAAAGTAAATAACAAACAAACAAACATTAAACTAGCAGATATTATATTAATGTTATGTGTAAATCACG…
Contig12877 628 reads, 953 bases	p2	(CA)6	12	1	12	CACACACACACAAATGCAAATACACACTTTAAGTAACACACATATAATTTGGAATATATATTTGAACCGCCAGAAATTAAAAGCCAATCTAAACACTTCTGATGTTGATGCGTCATTGCTTTAAGTTGTTAATTTTCAGTCGTTGCCAATCGTCTCTACAACTCCGAAGAGATGACCACTAAAAATGCGCGAGAAAATTTAGCAGACGATGAGTTGGTGTGGAACTTGGACAACGTAGAGGACTCCCTGGTCAGTCGATTCGCCTCAGGGGATGCCGATACAAGAGATATCGACCACGAACTGGAGCAAATTTTGTTCGAAAGATCAATTTCTCTCCTGGAAGCACCAATCAAGTCCATTGTTGATGGCCGGAAGAAGAGGAAGAAACGGGGGAAGAGA…
Contig12894 40 reads, 342 bases	p2	(TG)6	12	52	63	GGAAAACGAATATTCATTAACATGTCAACGATTGGGCACACAATATCAAACTGTGTGTGTGTGTATAATAAAGTTGGGGTGCCAAGTTCAATCCTCAAAAGTGAGCAAATGTGATGGCCAACAATTTGTCAGCCATCGTCTGACTTATGTCATCCATCATCTGACTTATGTTGGTCATCACCTGACTTATGCCAGAGACCATCTGACTTATGCCAGAGACCAGCTGACTTATGCCAGACACCATCTGACTTATGCCAGACACCATCTGACTTATGCCAGACACCATCTGACTTATGCCAGACACCATCTGACTTATGCCAGACACCATCTGACNTATGCCAG
Contig12918 156 reads, 233 bases	p2	(AC)10	20	29	48	GGGTAATACATTCAACTCACACTAGCTGACACACACACACACACACACATACACAGACGTCAAACACACCGACGACATCTACTTTGCGACCATGCCCCGCGCTCCGAAATCACAGAAGGATCCCAACGCTCCCAAACGTCCACTGTCGACGTTCTTTCTCTTCTCACAAGACGAACGGCCCAAGATCAAGAAGGAGAACCCTTCGCTCTCCGTCTCCGATATCGCCAAAGTCA
Contig12965 78 reads, 248 bases	p2	(TC)7	14	5	18	GCCGTCTCTCTCTCTCTCGCTCTCTGTCGTTCTGTCGTCATCTCTCTCTGTCTTGGGCCCGCGGAAAAACAAAAGTCAAAAATGACCCACTTCCCGTGATGCCATCGAGCTGAAATTTGGCACACGGACCCGTCTCACCTAACAATGCATCGTATCAAAATTTCAGATCGATCGAACGTACCGTAATTAAATTAATGCATTTTTAGTTTATCCTTATACTTATATGAGGTATGTACATGTAATTCAAA
Contig12984 483 reads, 768 bases	p2	(TG)6	12	627	638	GGTCCTCTGTCAGAAACAGTTGGAGGACCTTGCTGCTCTGGAGAAACATTCAGAGGTGAAAGAAGAAACAAAGGCAGTAAACTCTTCAGATCAACAAACAACTTCTACATCTGGCACAAACTCGCAGGAAGACAGAGTAGCCACCCCTGAACTTCGGCCCACCCCCGCTGACCCAATTAAAGTGGAAGCGCCATCCATTGACATTAAACCTGCGATCTCAACCCTTGAGGTGACCGTTCCGTCCAGGCCGCTGACCACTTCCTCCCAGAAGTCCCTATCAAAACGCACAGACCTAAGCAAACACCCCAGGACACCAACGCTGACACAGGCTCAGAAGCCTGAGTTTAAGCTCTACGGGGGCACATCCGCCTATCACAAACTCTATAAAGCCAAAGCCTT…
Contig13225 260 reads, 593 bases	p2	(AC)7tgacactaa(AC)7	37	400	436	CGTTTYTGTAATGTTAATTTAATCTTCAACATAGTGAACAATTTCCATAAAAAATGTTACYGCTGGTTAAAATGTTCAAATACACTCAAATTCTCATTCAAAAAACTGGAAGACAACTAGCTAATGGTACACAATGACAGTTGATTTATAGTTTGTAAAGGGAGTAGACATCTCCTACAGCTATGGCAACTAGACACCATTCTTGCTACACTTTTCCTCTGTACACATTTCACCCAGAAGATTGCTGTTGGCCAAGAATTTCTTTCAAATCTGACACACCTCATATGACACATTTTTGGGCTCTCTGGACACAACTTTATTGAAACTCCTACAAGCACATCTGATGCATTTGATGACACTCCTCTGACATGATTTATGGCATACACCTTACACAACACT…
Contig133 4561 reads, 642 bases	p2	(CT)6	12	475	486	GAGATCTACACTCTTTCCCTACACGACGCTCTTCCGAAAAAAAAAAAATAGGGATAACAGGGTAATAATTATTCATTCGACATTGAAGGTTATGCAGTCATGAGTGGAATTATCACACACATCGCTACAGTCTGGCTCATCTTCAACTTTCTTGGAGCACATGCTCAGCAAATAACAGCTCGGTTTGACTATGGGGATTGTTTCGGCTCAATTGGTACTTGCAACACTTTTGACGTGGATGATGCTGACACCTGTGATGTCGCCTGTAAAGATTTAGGTTACCACTTTGGAGTCTGTGTCGTGGCCCCTCCTTCTCAATGCCCGGGACGACATCCGCGTTACAGATGTCAGTGCAGGCGTGTGGCGCCGCAGAATTAGAAGGATCATGCTTTCAAGAGG…
Contig13312 88 reads, 486 bases	p2	(GT)7aaagccaacaagtatgtgtaaagtcaacaagtatgtgtgtaaagtcaacaagtatgtgtgtaaagtcaacaa(GT)5aaagtcaacaagtatgtgtgtgtaaagtcaacaagtatatgtgtgtgtaaagtcaacaagtatgtgtgtaaagtcaacaa(GT)5aaagtcaacaa(GT)6aaagtcaacaa(GT)5	230	122	351	ATAAGTAATCACTGAGTGTATTTGAATAATGCGCTAAAACTTGGCGTTGATTCTACAATTGTGGGTTTTCAGTTTACAAGTATGTGTGTAAAGCCAACAAGTGTGTCTGTAAAGCCAACAAGTGTGTGTGTGTGTAAAGCCAACAAGTATGTGTAAAGTCAACAAGTATGTGTGTAAAGTCAACAAGTATGTGTGTAAAGTCAACAAGTGTGTGTGTAAAGTCAACAAGTATGTGTGTGTAAAGTCAACAAGTATATGTGTGTGTAAAGTCAACAAGTATGTGTGTAAAGTCAACAAGTGTGTGTGTAAAGTCAACAAGTGTGTGTGTGTAAAGTCAACAAGTGTGTGTGTAAWGTCAACAATTGTGTGTGTAATGTCAACAAGGTTGTGTGTACCGTA…
Contig13653 524 reads, 883 bases	p2	(AT)9	18	7	24	ATTTTAATATATATATATATATATAATGTGGTGCAGCAAGGTAAAGTTACTATTTTCAGTTAGAAATCTCTCAATTAAAAAAAGGTTTGTCATTATTGTTTTGTTTTCGAGACTTCCATCCCAATGCTTTGTTTAAGACTACAGCGTTTGAGATGGAATGGCGAAGCCCGGTTTCCGGATGATAAACTCTTCCAGTGGAGTCTTTGGTAGCACGCATTGGCTAGTGGAATTGTGGTACCTTCTGAGCCGTGCTTTTCTTTCGCCTGTCTTTCCATCGACGCCTACAAACAGTGCATCTCGAGACGACAGCGACGGGCATTCTGAGAAGAAGTTGAAGGGGGACAAGACGAAATTGAGCTCCTTCCCCACTGTCGACAAGTAAGGGAAATCTTCTTTGCG…
Contig13766 1107 reads, 1827 bases	p2	(AG)6	12	1680	1691	AAAAAAATAGGGATAACAGGGTAATACATCCTCCTTCAAGCCAGCAGGGTGAATGTAATGCTCTTTGCTAATGTGAATGGTTCGCCTGACAATCTGACGAATGCTATGGACCCAAAGAGCCATCCGGCACTACCAGGGTACCAGCAAACCGTCCAAAGTGTCAATTCAGGTTCTAACGACAACTCAAACATGACTTCTGAACAGGGGTCTATAGCTGCTAATGCTGCAGATATCTATGATTTTAATCATGAAGATGGCAACAGTGGCAATGAACAGCCACCTCCACCACCACCAAAACCAAAAGGTCGTCGTGGTCGAAACACTAATCAGCTCCAATTTATGTTAAAGACTGTGGTTAAAGCAGTTTGGAGGCATCAGTTTGCTTGGCCATTCCATCAG…
Contig13959 236 reads, 497 bases	p2	(TC)6	12	323	334	GGGTAATGTTCGCAACTGTGTGCACCTCGCTCTACGCACGTGTTATTTTGCTTATTCGTCGAACATTCAAGTCGATTCGGAGTTGAAAGGACATTATGCCGGCTCATAGTTCCAAACGAAAACGTGCCAATGAAGTTCATAGTAGCAAGGTAACACAACGAGGCAATGTGCCCAAATCAGGCAAACAAGTGGAATCGAAAGCACCCGTTGGTCCATGGTTATTGGCTTTATTTGTTTTTGTTGTTGTTGGCTCGGCTGTCTTTCAAATAATTCAAAGCGTGCGAATGGCCTGAATGTGAACATTTTTATGTTTCCGTTTTTTTCTCTCTCTCTCAGTTTTTGCTCATATTTCAAGAATGATCGTGCAAAATCGATCAGAATTGTTTTGTCTTTTTCTGA…
Contig1398 2495 reads, 956 bases	p2	(AC)7	14	134	147	ATGTAACATTTTCCATGTAAGCCCATGCCAATAAATTTGATACATTAAACAAAAATTGTTTTTAAAAAAAATGTAACAAATTTGTTGTTTTTAACAATAAAAGAGTAAAATGACATTCAACATCAATAAAATAACACACACACACACATTACTCTTATTAATTACTCTTCCATGTTGTCAGCATCTTCAAACTGCTCAGAATCCACTGGTGGTTCTTCATCATGTCCATTTGCGATACGTATGAGATTTGTGCGTGTGGTAATATCGGCGTCCCCTTGGCCTGCATCCAAAAGTTGGTTTAGCCTTTCCAGGTTTGTTCTGCCGTGTTCTGTCAGATGTGCAACTCCATCTTCATTGCTATAAATTCCATCCCCGCTGCCGTCATCATCAGCATCCTCA…
Contig14078 185 reads, 532 bases	p2	(AC)8	16	220	235	TCTACACTCTTTCCCTACACGACGCTCTTCCGATCTGCCACTTTCTGTGCTGGATTTGGTGGTTAGGTTGAAATAAATGCAACTTAAGCGGAGTAAACAAAACAACACGACAAGCGACTTAGTAGTCACCCGTCGGCCATTCTTGTGTACTCTCGTTTGAAAGACTCGTGAGACGATAACAGAGAAGAAATAAATATAAAAAAATTACCTTATAGTTAAACACACACACACACACAAATTAATAATAAACAACACAAGGAAATAAAAAAATATGTTTTCATTCTAAATTTACGAAATAAAAACACATTTAAAAAATTTTTTTGGAGTAATTCCTWACAAACAATCAATCATATTCTGACGTCAGACTCCCCAACAGTTCCCTACTATCGGGTCTCCATT…
Contig14122 21 reads, 155 bases	p2	(AC)6	12	63	74	CAAGGTCACCTACATGCACATTTTAGTTGTAGTTGTGAAGCCAGATGTCTTGAAAAAAAACAACACACACACACTACTGTCCTCAGGCAAACAACATCTGTTACAGTCAAGAAAAATCCTATCGCCGTGAGCAGGTTAGCGATGAACTTTGACTG
Contig14146 252 reads, 887 bases	p2	(CA)7ctcatacacacc(CA)6	38	38	75	CGGTAACGCATGGGGTAGGATGCAGGTAGTATATTAGCACACACACACACACTCATACACACCCACACACACACAAACACAAAAATACATACATACATACAGACATACATAAATTCATACTGAACATACACGTAAATACGCACTGCTTAAGTTTGTGACAATGACTTCAAATAAGTGCTTGAACTGGATCAAATTATTATTAGCAGGGATTGCACTGCTGGTTTCAATATGGGCATTGACGATCTTGGTTGTCCATATGATGGAAGCTAAGACAACATCAAACCAACACTCTGAAATATTAAGCCACGAAAACGTAACAAATCATAAATGGGCTAAAGCCTGGATACTACGAACACGAAGTCGTTAAGTTTAATTATGATGAAGTCGGTCACCAGAATG…
Contig14216 233 reads, 595 bases	p2	(TA)6	12	564	575	GAGAACACCTTCTACTTAAGATCATCATGGTTTCTACTTACAGTTACAAAAGTCAGACGAGGCCTGGAGGCTCCTTATCTATCCCATGGCCGGCTTAAGTGACACGTGCAATTAGTCTGAACAAAAGAAATCTACCGCCAGAAGGTATGTTCCAATACCAGTGGAGCTGTGGTGTTCACATTGTCAAGGTCAGTGTTAAGTCAATGGGCCACCTCACCACTTATCACTTAGTGAACTTAGTCAACTCAGATGAATAGTAATAGTATAAAGCAAGCTGATTAACTGAAACGTGAACCACCTGAAGATATTGGACACCTACCTCAAGATGAAAGAAACCTACTTCAAGGCCTAGGACATTCACCCCAAGATGAAGCTAACCCACTTCAAGGCATAGGACAC…
Contig14264 205 reads, 382 bases	p2	(CA)8	16	203	218	AACCGCTCTTCCGATCTGATATAAGATCCATGCGCTTCACAGTGCTCGGTGTAGCAGTCTTCACATTTTCTTCCCAACGACTAGCAGACAAAATTTCTTTCAGTGGCAAAGAGCTTTCAATGAATTGTGACTTCCAAAGCATGCAGCTTGGCAGCAAATAATGAAATTCATTTTAAATTGAAATATTCCAATGAGACTATTCCACACACACACACACAATTGAATCCAAGAAACCAAGTATGGGAAAAACCAAAAATAGGATCGAAGAAACCTATAATCCATCTTCAGAGACAATTTTTGAGTCATTTTTCCCCCCAGTAATTTATTTACCCCTGACTTAATGCAGGCTTCCTTCATTATTGATGTAAAAAAGTTTTTTTTT
Contig14274 18 reads, 197 bases	p2	(GT)8	16	84	99	TTATGTTTTAATGTTTACATGACTGAGTAAGTTCAGCATGACTGATTTCACTGAGAGTTTGCATGTTATTTAGAAGGTTGAGAGTGTGTGTGTGTGTGTGCTTGATAAACTCAGGCATAGACCACTGCTTGACCTGGTGGCAACCTGCACANCTGCCTGGATCTACTGGTAACCTCTTATGAAAGAGATCGGAAGAG
Contig1441 44 reads, 166 bases	p2	(AC)52ag(AC)6	118	31	148	ATTTTAAATTCGCTCTCTCATTCGCAAAAAACACACACACACACACACACACACACACACACACACACACACACACACACACACACACACACACACACACACACACACACACACACACACACACACACACACACAGACACACACACACGCACCAACGAAAATTTCG
Contig14478 147 reads, 194 bases	p2	(AC)6	12	31	42	GGRTGGGAAACACACTACCTTTCTGAACAGACACACACACACTTCCTGTACTTTAAGTGTCAAACTCCAACTTAATTCAATGATTAGCTTTTTAAGTACAGTTATCTAGAACATAGAAAATGTCAAAGAGGTTTAGGTTGAAAGTAAATTTTATAATTTTAGCTTTCGTTCTTGCAGCGCCTTGCTTCTGTAGC
Contig14531 235 reads, 518 bases	p2	(GT)6atgcttatttaaactatccca(TC)7	47	393	439	GGGATACTTCWCCCGAACGCATCCCCGTCGTCGTCGAGCGCGTACCAAAATCGCAAATTCCCGACATCGACAAGCGCAAGTTCTTGGTACCGAATGACATCACCATCGCCCAGTTCATGTGGATCATCCGCAAACGCATTCAACTCGCCCCCGAGAAGGCCATCTTTCTGTTCGTCAACAAGACGATCCCACAGTCAAGCTCGACGATGGGTCAAATCTACGCCGAACACAAGGACGAGGATAGCTTCCTGTACATCGCCTACGGTGGCGAAAACACCTTCGGCTAGATCGTATGCACCAGCCCAGTCGAACCCTTCGATATTTGCTAATTCAAGAAAATTTCATTCTGTACATTTGCTCTCCTCTGATTTCCTTTGTATCTGTGCGTGCGCGTGTGTG…
Contig14610 14 reads, 162 bases	p2	(TC)5ttcctt(TC)5ttcctc(CT)17	66	69	134	TTCAAAATCAAATGTCCATTCAGTAGAATGCCTGTAATTGTAACAATAATATACTGCAATACTCTCTTTCTCTCTCTCTTCCTTTCTCTCTCTCTTCCTCCTCTCTCTCTCTCTCTCTCTCTCTCTCTCTCTCTCACTCATCACAGCACTTGATATATTTAT
Contig1462 12 reads, 202 bases	p2	(CA)7	14	95	108	ATCGGTCTCGGCATTCCTGCTGAACCGCTCTTCCGATCTCGGGATTCTTGTAGTGCTTGATATTGGCCATAATCCAGAACATTGGTGAAACTMWCACACACACACACATTTTCTTTGCAGTATTCTGTTTGGTCCTCTCCTCTGTTCCAACACAGACCCATGTAAAAACAGATCGGAAGAGCGTCGTGTAGGGAAAGAGGTG
Contig1465 2283 reads, 706 bases	p2	(CA)5aacacacccag(AC)6atacacacgcacgcgagcacg(CA)5	64	508	571	ATTTTAATGAAAGATCGAGTACTGTGTCATTTCTGGTAATTGGTGGGTAATAGAGCCCCAAATATACCGTAGAGAGCTAACACACCTCGTGGACGGTTGATTCAGTTTTTTTTAAAGCTGAAATTTTAGCCAGTCAAGAAGCGGTTAGCTGGTGTTGAACACATGAAGATGAAGTATTTACCCATTGTGACTCTTGTGTTTCTGCTCGTCACATTCACTGCAGTCGACTCGTTATTAATGAGGAAAGCTCTCCGGGGATGCAAGTACGGGGGTAAGATGTATCGTATGAACGACGCTGTCCCTGTTCCCAAAAAGATGTGTGAGCTGTGCTTTTGTCATGATTATCTCTACATCACCTGTTTATCGGATTCGCTTTGTGAAGTTCAAAAGGAGTAACTG…
Contig14768 68 reads, 163 bases	p2	(CT)5accacctccctacatgttccacactaacatcaattgtcaa(CT)5accacctccctacatgttccacactaacatcaattgtcaa(CT)5	110	52	161	AACCCCGACAACCGAGGCTCCAGTCGTTTATTACTAAACATCAATTGTCAACTCTCTCTCTACCACCTCCCTACATGTTCCACACTAACATCAATTGTCAACTCTCTCTCTACCACCTCCCTACATGTTCCACACTAACATCAATTGTCAACTCTCTCTCTAC
Contig14786 40 reads, 235 bases	p2	(CT)7	14	217	230	CCTACACGACGCTCTTCCGATCTTCAGCAGCAAAACCAAAACATATAGAAATCAACTTATCACAATATAGAAATCAACTTATCCCAACATAGAAATCAACTTATCCCAACATAGAAATCAACTTATCCCAACATAGAAATCAACTTATCCCAACATAGAAATCAACTTATCCTAATATAGAAATCAACTGCCTCCGTGACGTACTTTATGGACGGCCTCTCTCTCTCTCTTTCTA
Contig14789 10 reads, 137 bases	p2	(TG)5cgtgtatgtggtatgtatgtgtttggct(TG)5	48	7	54	TTGGCTTGTGTGTGTGCGTGTATGTGGTATGTATGTGTTTGGCTTGTGTGTGTGCGTCTTATCATTTTAAATAATGTGTAAAGGAGCGTGCATGTATGTGGTATGTATGTGTTTGAGATCGGAAGAGCGGTTCAGCA
Contig14915 23 reads, 160 bases	p2	(TC)6	12	93	104	ATTTTGTCCTCAATCCCATAATACAATTGTTTTAAATTACATGTTAACAGATGATTTCATTCTTCCAATAAGGACATAAAGGTTTTGACTTATCTCTCTCTCTCTATCGTAAAAATGCTTGAATGCTGGTGATCGGAAGAGCGTCGTGTAGGGAAAGAGT
Contig15227 72 reads, 186 bases	p2	(GT)6	12	57	68	GTAATAGACCACTCGCCTGTGTCTCGTTGAATGTTTCTTTCAGTCGACGTGTGTGGGTGTGTGTGTGTGCTCGCGTTGACTGTTTCTTGTCGGAAGCTTTTAAGTTTTTTCAAATTTCAACTGCAGTTCTGATTTGTAGGTGAGTTTGGGACGAGCCATGAAGACGGAACATCTGTTGCTGTTGGC
Contig15260 181 reads, 488 bases	p2	(CT)7	14	317	330	TTTTTTTCAACTACATCAAATTTATTTTCTATTTGGGTCCACTGAGGGTTATTTAAAAAAGAACTGCACATGTTTTTTTTAAATTTTAAACAGTTTTGGAAACAAATTCGATTCTACACAACACAGAACGATGAACAAGTAGGTCACAGTGCATCAAAAGTTTAAGACCCTTTCAGTGCAGGTCGTCGCCGCTTTTTAAGCCTTTCATAGTCAACAGCGTGTCCTGCTCAGCCAAGATACACAAGCAAAAGTGGGAGCCGTGCTTTGTGGAGATGGGACAGCAGCACACATTTCGTAAAAACTGGTCGAACAGTTCCTCTCTCTCTCTCTCCTCGTTACTTGCTCCTAGCTGTGGGGCACACCGAAAGAGGGAGAAAAAAAAACCTGAAATGTGTCCCT…
Contig15269 10 reads, 198 bases	p2	(TC)12	24	24	47	CATTTATTTGCGAGGGTTGGTGATCTCTCTCTCTCTCTCTCTCTCTCCCTCTGTCTGTCTGTCGTGGGTGGTCGGACGGGCGGAAAAACAGAAGTAAATAAAACAACCCAGTAAAAACAAAGTTTTTGACTATAAATCCCTTATATATGAGACATAACTAAAAGTATTGATTATGTGCAAACGCGACAAACAGACTGA
Contig15274 12 reads, 108 bases	p2	(GA)5c(AG)6	23	81	103	CAAATTTCAGTTCGATCGGATCATTGGAAGTGGGTCATTTTTGACTTTTGTTTTTCCGCCCGCCGAGCCCATGAGATGATGAGAGAGAGACAGAGAGAGAGAGACGGC
Contig15340 14 reads, 147 bases	p2	(TC)6	12	24	35	AAAAAATAGGGATAACAGGGTAATCTCTCTCTCTCGAGTTATGAGCCTAGCTGAGAAGTCTGTTTTCAGCTAGTATGCGAGTATTAGTATGTTAGATCAAAGAATACTAATTGTCAAGCCAACCTAGTAGATGAGCAGACCAGACGG
Contig15617 436 reads, 568 bases	p2	(AC)6	12	258	269	GCGGTATATTCGTTACCAACCAGATTCTGACCTGTTTCCTGGTGCACCCGACATTACAGGGAGTTAACCTAATCTCCTGACTGCAGTCCTGCCCAGGCCGAATAATCGACACACGGAGTCAAGAGCTGGACCAGTCGCGGTCTCAAGTATCTTGTATCCGGCACCCTCCTTCATCCCTGCCCGAATATAAAAGGACATTAAGGGGGACGATTTATCGTAAACCAGTTTGTCACATATAACCGTGCAAACTGAAGCCAACACACACACACTGTGCCTGTTGATGCCCGCACGTCACATACGCGCGGAAGCCGGCTTGTCACACACTGTGCCTGCTGATGCTACCTCAACCAGAGGCGAGATATCCAACACGCTGCCTATAGAACAGTAGATCACCCAGTG…
Contig15644 335 reads, 973 bases	p2	(AT)7	14	44	57	TTTATTAAAAAGCATGAGGCGTACATCATTACAAACTGTATAAATATATATATATATGACATCTACAACACTTTCAGCTTGAAATTTGTTTATATCTAACAACATGCATAGACAATTCTAAGACAATACATGCAGCTCATCTTTTAGACATAAGAGCTTCAATGTCATCAACTCGTTTAGGACAAGCGGCAGACATATTGATGGGTTCAGATTCTGTGACTAAGACATTGTCTTCTATTCTGATCCCAAGACCTCGAAATTCTTGGCTGACAGACATATCATTTTGAGGGATGTAGAGGCCTGGCTCTATAGTGATGACCATGTTTGGTTGAAGTCTCATTTGTCTGGACACATGTGTGGTGTCATGCACATCCATTCCCAGGTAATGGCCAACATGGT…
Contig15743 22 reads, 298 bases	p2	(CA)11	22	14	35	CCCATTCAGCTATCACACACACACACACACACACATCACTTAACTAGATAGATRTTCCTCACCTCCACTAATCCAATCACACACATCACTTAACTAGATAGATGTTCCTTTTATTTTTAAAAAAAAAGGTTGTGAACTGTGTTAAAACTCATAGCTGTTTAACTTAAACCTTTTTCTTTATTCCTCATATGGGTACGTTTAGATATTTTACAGTTTCAGAAAACAGCATAATCATTAAAGAAATACATACGTTTTCTAAAGTTGAGATCGGAAGAGCGTCGTGTAGGGAAAGAGTGTA
Contig15848 293 reads, 543 bases	p2	(TA)7	14	293	306	TGTACATTAGATTAGACAATTACGTTATTCTTAACGCATCGAATCGATTGGGTGGTAGAATTTGCAGTGTTCAATTGTCAAAGAGGACGTCAAACTAGCCGAGGAGCGAAGGATGGAGGAGCCTACAAACAGGAGCTAGGAGAAAGGCCAAAACATTTGGAAGCACAGAACTCGTGTGTAAAAGCTGTGGTAAAGACTGTCACTCAAGGATAGGACTGCACAGCCACTCGAGGAAATGCAACCCAACTCAACGGTGATGCACCATCTTCTCACGAGACGGAAAGATTTTGAGTATATATATATATAATAGATATTGAGGGTTTTGGCTCCCAAAGATACTGAGGGTTTTGGCTCCCAAAGATATTGAGGGTTTCCGAGATATTTTTGTAGAACTGAAGG…
Contig1595 3780 reads, 751 bases	p2	(AG)8	16	563	578	AAAAAAAATAGGGATAACAGGGTAATCAGAATGATGACCTCATCAATCCAAGCCAACAACCAAGAGGTCAGTTCTCCCAATTCGGTAATGGAATGTTCGGCCAATCATCGTATCCAGCTGGCTTCGTCCAAGACCCCATCGTCATCAGTCAAGGTGGCAACGTGTACTCAGGAGTCGTCAGAGATCTTTCCGAGGCTGACCTGAGGGGTCGCGGTATTGCTATCTGCTTGGACTACCTGTGCCAACGCCCCACCACCACCTGTTGCTCTGTGGTCAAAGACTCAGTGCCTGCCACTGAAGTTGTTGGTGCCCCAACCATCGGATCTTACTCAGGCAGCCAATTACTCACTGGAACTGGAACCGGAACTAAAGCCACAACTGGCACCGGTGGAGGCAGCC…
Contig15963 374 reads, 630 bases	p2	(AG)10	20	65	84	CTCCTCTCACCATGGCATGAGTTAAGTTCCTTGCTCAACACACTAAGTAAAGATTCAGGCACTAAGAGAGAGAGAGAGAGAGAGAAAAGACAAAATAAATCACTAGTGGTGAGTGTAACACATCTTCCAGCCAGCTGCATGTAACATTGTTTATGTTCAAGAGGTTAGAGAGAATCCTGTACAGTTGGGGCCATCATGAAACAATCTGAGAGTTCTTGGCCACAACTTCCGACTGGTAGTGGTTCTTACAGTACAGGACCTTCTCGGCCTGGGCGTAGTTCTGGAGGTTCAGGGACATCTTGCAGTGAGAACACTTGAAGCACTGCTTGTGGAAGGGAACACCTCCAGCCTCGATCTTCTCCTGGGCGTACACTGTCTTGGAGCAGATACCGCACTTGT…
Contig1597 361 reads, 250 bases	p2	(CA)10	20	15	34	CTTTCACCCTCCATCACACACACACACACACACACCCAACACCTGACCCATTTGATATCATTCCAGTCAAGAGACAAGATCATACACAACACCCCCATCCAACTCACCCAACACCTGACCCATTTGATATCATTCCAGTCAAGAGACAAGATCATACACAACACCCCCATCCAACTCACCCAACACCTGACCCATTTGATATCATTCCAGTCAAGAGACAAGATCATACACAACACCCCCATCCAACTCA
Contig16012 101 reads, 212 bases	p2	(AC)6	12	190	201	TTAAAATGTATGTGTACTTGGATTTTAGCATTTTTATTCATAAACACTATTAGGATTTTACCATTATTATACGCATTGATTATCAACTGTCCATTCTCTGCCACAACTTGTTTTCCAACTCATGCCCGTCCTTTCTTACTGGACTTCTCTCTGTCTACTCACCCTCTTGTCAGCTACTCTCTTCTACAGACACACACACACWYTCTGTTCAT
Contig16161 12 reads, 244 bases	p2	(AC)5cagacatacacac(CA)6ccag(AC)5cag(AC)5	62	94	155	CCCACACACCATGCACATACGAGACACACTGATACCAGACGCTCACACGAATAAATTAGACACACCCACACACACGCACTGGACACACACCAGACACACACACCAGACATACACACCACACACACACACCAGACACACACACCAGACACACACACCAGACATACACACAGACATACACACAGACATACACACAGACATACACACAGACATACACACAACGCTATTTTAAACAGATCGGAAGAGC
Contig16240 351 reads, 1181 bases	p2	(TG)6	12	1084	1095	TAACAGGGTAATATATAACAACAAGCTTAAGCAACAACGCCAAGAGTTTATCTCTTCTCACTCTTCATTTACTTAAAAACACAAATTCTTCAAATAAACCCAACAGTTCTCATCAGAACTTACCATCAAAAATGACCGAAAGTACATCAGCACCAGTTTCATCTGCACCATCAACCGCCGCTGCCGGTTCACCAAAAAAAACAGCAAAAAAATCGACCAAAAGCAAATCAAGTGCAAGTTCATCGCACCCAAAATACTCCGATATGATCAAAGCTGCATTAAAAGCTTTGAATGAACGTAGTGGAAGTTCACGTGCAGCAATTCTCAAATATGTTTTGGCCAATTATTCACTTGATCCTGCTCAAGCCAATCAACATTTGAAATTAGCATTGAAAAATG…
Contig16243 203 reads, 363 bases	p2	(TC)7	14	141	154	AAAAAACTCGGTAAACCAAAAAATAAACTCTGAACATAATTGCCATGGATNTTTTTTTTTTGGTTACATTTTCCAACCTGTGTCATCCAGAATGTTTTGATTTTTGGTCTCTTAATAAATAAGCTCAGTTGAGAATTTCATCTCTCTCTCTCTCACACACAGACACACAAGACACTTGTTGTAGCAGCCATAAATCACATTTTCAGTTTGCCCACCAGGCCCGTCATATCAGCCAGTTGGTGGTATGTATCACTGTCAAGGCCACTTCTCTCCTTGGCGCTCTCCCCTGGACCATCCTGTGCAGGGGGCTGACCTTTGACCTTGGGTAGCTTGAGAGTGCAGGGCAGCATCTCCCTCATGACT
Contig1650 482 reads, 454 bases	p2	(CA)8	16	1	16	CACACACACACACACACTCCCTGTTATCCCTATTTTTTTTTTTTTTTTTATTAATGTGCCCTTTTAATTTTTCACACTAACAATTTACAACAAAAATTTTGATGACAAGAGATTCCTTTTAAACAAGAATATTTCAACAACAAAAAAGTAATTTTTCTGAAATTAGGGCATAGGACAAAACAAGCATGGCTAGTACTTCAAGCCTGCTAACAGTCGGGCAGTGGATTTTTAACTGCTGCTTAGGGTCTCCTTGTCAAAGATGTACTCTCCGAGCCCAGGTCCVACACGTTTCAGGTTAGTGATGTAGTCACTTAGTTCCTTAATGGACTTGACCTGCTCCTCAAGGAACTCAGACTCCAAGAAATCTGCCATCTGGGGATCATCATGACTGGTGCAAAG…
Contig16560 123 reads, 742 bases	p2	(AC)6tcaaacacaaactcact(CA)5ccacacacacgcag(AC)7at(AC)5aaactcacatact(CA)5acacacacagacatacattcacacacat(AC)8cactcatgcacacacatacatactcacccacagac(CA)6cc(CA)6ccacaa(AC)7	227	494	720	GTTTTATAAAGTGTACATACATTTTTGTATTTTGGTCACTTAAATGTAACTTTYACACARCTTAAATTATACTGTGTGCTTAATTTTAATCACTTCTTTTCTCTTCACTTGACTTTGCATTTTCGCCCGATTTAAAAAMAAAAACTGTTCAAGGAGGTTTCTTTCTTCCTCCCTTCAAAATGCTGCGGAAATGAATTAGGCAAGTGCAATTCAATAGATCCGATGCACGACCAATTGCAACTTTTTCTGGGTGTTTCTTTTCCACGAACTCTGAAACTCGACAGCTCGTGTCTCAAATAACTCGTATGTTAGGGCACTCGTATCTCAATGTACCACTGTAGTTGATTACAATTTAATTTTGATGAGATTTATATTAATTTTATTTCCTCTATTTTGAAG…
Contig16573 201 reads, 501 bases	p2	(GT)6	12	119	130	AAAAAAAAAAAAATAGGGGTAATAGGATAATCCAACATCTCTGGACCAAATGTGTCAACCAGAAGGTCTTCATCCAGTGTTTTTAAGTCTAATTTTCATCGGTTGCGTGCTATTCCTAGTGTGTGTGTGTTTTTCCATTACTCAAGATTCTCACAACAGTGCCCACCAACCCTGAGGAGGCGCTTTTGTGTCACAAGTAGATGCCAGGTGTGACGCTCAAAATGCCACCTAAAACACCATCAGAATAAGCAATTGACTCAACAATCAAACAGCCAGTTAAGGACTCCTTAAGACCCACCTGGTCGCACGCCTTGTTGATGTGATGTTTCATGTCGATGGACTCGGTCACGCTCGAAGCGTGGAGCGCTCGCTTTACATTGTAAAAGAAGTGCTCCAGGT…
Contig16871 33 reads, 143 bases	p2	(AC)6	12	21	32	GCTAGGGATAACAGGGTAATACACACACACACAACCTGCCTATAAAAGGTTTCACGATCTCTTGTTACTTTGGGCGCTTAGAACCTTCCAGGTGTCCAGTCTGCAAGATTTGAGGAATTCAGAGTCAACCATGAAGTCTGCAA
Contig1691 3400 reads, 1275 bases	p2	(CT)7	14	11	24	GGGTAATCTWCTCTCTCTCTCTCTCGCTMTATCTCTTTGTCTGTTTTGCTTAGCCACGTCACATGTGGAAGCAGATTGCAACTTGTAAAACGGCAAAGCGCCATAGGGACGACTCTTAAATTACATAGGTCGAGATAAAATGGTGTATAAAACCTAAATGCTCTGCCTTGACACACGTCAGCAAGGCTGGGGTAACTCGAATTGATTTCAACATCACGACGCATGTCTGGACAACTCTAATCTCTCTGTACCAACAAGACCGCACGCATGAACGATGGTGACGTCATTGAAGTATTTCAGGTGGAGGAGCAGCAAGAAGGGCAAGAAAATTGCAAATTCGACATTTGTAAACTGGACATCATAAGCTTAGCAATAAACCTTGTTGCCATGGTGATAGCA…
Contig17190 189 reads, 520 bases	p2	(CA)5gccacacagtgcagtaccatrtggtacacatacatc(CA)5	56	115	170	GGGTAWTCCCCCCCTCCCCTATCACCTGTCAGGATAGATAGTTTCTTTACTTCATAGTTTCTTTACTTCAGTACTACCACACATCAGACCAGTCACTGCAACAGCACATACATCCACACACACAGCCACACAGTGCAGTACCATRTGGTACACATACATCCACACACACAGCCACACAGTGCAGTACCATGTGGTACTCTCACCTAGGTATCTGCAATATTGACAATGGCTGTCATGTGACTGCTGGACGTGGTGTCATGTGACTGCTGGACGTGGTGTCAAGTGACTGCTGGACGTGGTGTCATGTGACTGCTGGACGTGGTGTCATGTGTGACTGCTGGCTGTTGGTCATAGAGAGCTTGAGTTAGAGTCGGTCCTGTATCTCTTGTATGATAACAT…
Contig17265 58 reads, 228 bases	p2	(TG)7ttggtgggag(CA)6ctcatacacacc(CA)6	60	114	173	WGGCGATCTAAGTACAATCACGAAGGAAAGATTTCGATTCCGCACTGAAGACCTGCCAAGTCAGCTTTAGTGACTAAGCTACTCACCTCTACGACAATCACGTAGCATTTCTCTGTGTGTGTGTGTGTTGGTGGGAGCACACACACACACTCATACACACCCACACACACACAAACACAAAAATACATACATACATACAGACATACATAAATTCATACTGAACATACA
Contig17267 47 reads, 193 bases	p2	(TG)6	12	150	161	GGGTAATCCGTTGCAACAGCTTATATACTCTGATGACATTACCTGCAGGGGAGTCAGAGGACTTGAAACTGGAGCTCATTAATTATCACAGTCTTCGGTCAATGGAATGCCAACATATAATGTCATATTAATGATAATGTGAGGTTGTTTGTGTGTGTGTGTTTGTGTGTTTGTGTGTGAGATGAAATAAAAT
Contig17302 124 reads, 455 bases	p2	(CA)6	12	8	19	GGGTAATCACACACACACACTCTCAACAGAACACCACCATCAACAGGTGTCATCATTCAACAGAACACCACCATCAACAGGTGTCATCATTCAACAGAACACCACCATCAACAGGTGTCATCATTCAACAGAACACCACCATCAACAGGTGTCATCATACAACAGAACACCACCATCAACAGGTGTCGTCACTTGGGAACACCACCATCAAGAAATGTCATCACTTCAAGTATTAGGACAAGACAGATCAAAATGGCATTTCTGTGCCACCCAAGTATTAGTTGTGTTTACAATTGTTTCAAATGTCCATGCAACACTGCCAATTATGAAAACATGCTTTGATCACATACATCGTGGGTGTCTTGACAAAATATTCATGGTTCCTAAGAAATTTTTGTC…
Contig18029 15 reads, 232 bases	p2	(CA)5agtttagtgtcatgtag(CA)5agtttagtgtcatgtac(CA)5agtttagtgtcatgtac(CA)5agtttagtgtcatgtac(CA)5agtttagtgtcatgtac(CA)5agtttagtgtcatgta(AC)5	171	20	190	CAAGTTTAGTGTCATGTACCACACACACAAGTTTAGTGTCATGTAGCACACACACAAGTTTAGTGTCATGTACCACACACACAAGTTTAGTGTCATGTACCACACACACAAGTTTAGTGTCATGTACCACACACACAAGTTTAGTGTCATGTACCACACACACAAGTTTAGTGTCATGTAACACACACACAAGTTTAGTGTCATGTACCACACACAGAAGATCGGAAGAGCG
Contig18046 68 reads, 213 bases	p2	(CT)6	12	66	77	CTACACTCTTTCCCTACACGACTGTGGATGTGCTCTTGGCAATATTTCTTTATCTCTTCGACGCCCTCTCTCTCTCTCGGACGCTTCCTGTTTTGTAACTCATTGAAACTCTCCATAATTCTTGATCAAAGTTAAATAACTGGAAGATTCACTTATACCAGTCAGAGACAATTACCTACAGTCGAGACAAATGTTACAAACGAAAGAGCGTCG
Contig18107 320 reads, 957 bases	p2	(AT)6	12	885	896	CTCTTCMGATMTCGGAACTGGACCACTGTCATCATTGCGTCAGAAGTTACGAGGATCTGGCTTAGCAACTTTGAACCTTGACGAACTTAGTGATGAAGATCTTCTCATCTTGTCCCATAGTTATCCAGACAATGAACAGGTCGTTTGCAATAGAAGGTTACGAATGGGAGCGATGGGTGACGGGGGATGGGAGATTTGTGACGACAGTGACGTCAGACCCCGGAATCCTTGCATAATCTACTCGTTCGGAATCAACTACGACTTCTCGTTTGATGATGATGCCGCTGCGGTGTACGAATGCCAGGTCTACAGCTTTGATCCCAGCATGGCGAAATTCGCAGATAAGGTCAACAGGTCAGAGCGTGTATCGTTCCATAAGATTGGGCTCGACGAGAGAAC…
Contig18256 17 reads, 107 bases	p2	(CA)6	12	52	63	TCGCTTCTACGACCTTGACGGTAACGTTGCCTACGACTGCTTCGATTAAGCCACACACACACAAACACAATCCCCAGAGGAGATGGGTCTCTTGATGACGTCTTGGT
Contig18286 52 reads, 247 bases	p2	(GA)7	14	36	49	CTCACTCATTTTATTATCCTGATAAATGTACACTTGAGAGAGAGAGAGAATACAGTTTGTAATACAAAGCAAACAATCAAATGACTAAACATGATCAAAGCTAGACGTCGGCTGGTGAGGGCAAGCAGTAGAAACTCAAATCTTTTCCACATTAAATTGTTTTGCTTTTAATGCTCAAAGGTAACTGAACTGATAAGTCAAACAACAGTAAATCTATGAAAATGTAGAGTTGACGGAAGAGCGTCGT
Contig18367 214 reads, 667 bases	p2	(CA)6ctcacta(AC)7tctctcacacacactcactatcacatacacat(AC)5	75	288	362	TTGATGCCGAGTACAAGAAGAGGATGGCCGAATATAAAACTGTTTACAAATTTACTCTGGACAATTGATTGAATTAACAATAGCTAATTGCTGTTGTATCTAATTCTAATGCTCATATATAAATTTAACCATTCAGGCGATTTTAGTATGTTATGCATTATAAACTTTTCAATTGAAATTTTTCATTGATGTTTTATTTTGTCCAAAAGCGATACAAGTTATTATATATTTATGATTTCATGAATTTAGCGAGTCCTTGGCTATGCTTCCTACCCGACGCACAAAAGCACACACACACACTCACTAACACACACACACACTCTCTCACACACACTCACTATCACATACACATACACACACACATTTTATGTCAACATTTTTCCATTTACTTTTGCGCTC…
Contig18369 282 reads, 989 bases	p2	(CA)6	12	886	897	GCTTGCAATGGTAAGCAGTTGTATGTTTTTGTCTAATTCTTTTTATGCTATAGCTGGAGGAATTTCAAGAAAACATTAAATTGGAGTCAGTTATAATGCAGAAAAATAAAGTCAAGAAACCTAACATGAAGGAATAACAAATCATACTTTATGATAATAATAGTTTTTCCACAGACTGGTAATTGATATTATTAATGAACTAGTAGCAAGCAGTTGACCACAAGTCTAGTGACGGCATATATTTTTTTATTTCTTTGTTAACTAAAGGTGTCCAATGTCACGACAGTGATAGGTTGTGGGAATAAACAAGATGTCAATGCTGTTCTGGGCTTGGGGCTAACACCAGAGGTATCGCCATTCATTCTTTTTCTATTTTGAGATCTTAGTGTTGACAAGAGA…
Contig18490 164 reads, 483 bases	p2	(TG)6	12	464	475	CTTCTTCTGGGCCGCTTGAGCAGCGCTCGCAGCTGGCTTCTTCGTGGCCGCCTTGGCTTTCTTCACGTCCTTGGCAGCTCGAATAGCTTGCTCGCGTTGAGCCTTTCGCACTTCGGGCTTCTGGTTTCGCTTCTTCATGATATCCTCAAGAGTAGCGCCAGTAATAGCACGCTGGAACTTCGCCAAACGACGCGACTTCTTCTTGGTCTCTTGCTCAACTTGACCCTTCTTGTGCTTTCGCCTGTACAAGACGGTCCAGTTGATCTCACGCGGGTTTCGCTTGAAGTTGTGCGAAGCCTCGGATTTTCGGTTAATGAAAATGATGGTCTTCAAGTCATACTTGACAACGCGTTTGCCGTGACCTGGATAGATTTTGAAACCGCTAAATTGGCACAACTC…
Contig18497 48 reads, 168 bases	p2	(GA)7	14	50	63	CAAGACCAAACACTTCCTGGTAAAACCGCCTGTTAAGAAACTATCAACGGAGAGAGAGAGAGAGTAGCTGGAACACTGAGCTAAGTGAATTAAAACCTTCAGACACTGAGCACACKACAAAATATGTGATCATGTTGGATAAGAATTTTCTTTATTATAAGTTATGTG
Contig18510 54 reads, 381 bases	p2	(TC)8	16	226	241	ACAAGTCCAATTAGTAAGTAATACATCAAATAATAAATCCTTTCCCTAACATGTAGGATTTATCAACATATTTTAGGACAGCAATGAAAATTTTTCAAAACCAATTAAATTCTCCATTATTTTAGTGTTATAAATTGTTGACACTGCTGAAGTCACCTAGTCCCGTTTCTTCAAAACAGCACTTTATGTTTACTTCAAAGAACCTTAATAGTAGCTTTATAAATTTCTCTCTCTCTCTCTCATGTATGATAAAGTCTCTTGGATAAATTAAAAAAAAACCTAATGCAATAGTTTTGATAGTGGGGAATATAAATCTCATCTTTAAACTTGTTAGCTCAAGAAATCCTACTTCATTGGCATAAAGATCGGAAGAGCGTCGTG
Contig18532 53 reads, 266 bases	p2	(GA)6	12	111	122	TTTTTTGCAAGCAACAATGTTTATTAATAGAATCTTTTGATGATTTCTTCGACGTGCATGATATTTTCAAAATCGCTTTATAACTCCTTTATTACTAACATGAACTGATTGAGAGAGAGAGAGGGAATATTGAGTTAATAGCGAGTGCTTGTTTGACCAACTGATCGAGCAGTGGTTGCACCTGTACCAGCTGATCCTGTTGCACCAGTGGCTGACCGTTCAAACATACGTCTGGTAGATGTACCAGTAGGGCGTGCTGTTGTGCG
Contig1863 24 reads, 237 bases	p2	(CA)6	12	102	113	CAAACTCATGATTCTCACGTGACAGTGTTGTTCAAGCCAGATGCAAGTTATAATTACATTAAAGGCCAGACTTTCCCGGCTGGGTCCTGCAGATCGTGAGGCACACACACACATACACTAACGGTATATCTGTCTACACCGAAGCTGGAGGCACAGCAGTTGTCACGTGCTGGCACGTGAGACCGCACCCATTTGACCTACATTCATAGCCATCTGGACATCSCTGCACCAGCCCTA
Contig1866 3801 reads, 1567 bases	p2	(TC)7	14	217	230	CATTCCTGCTGAACCGCTCTTCNGATCTANTCNAAGCANCTATGCTAGAGACACTGTTAACTAAAATTCTATACTCAACTCTCCCAGTCATCAAAACCATAAATGAAAATTTAACAAAATCATTGACATAAACTTTTGAGCTTCTGGTTAAAGATTAGTAAAGAATCTCTATACACAAATATTCACTCAACATAATACTTGGCAGTATTTCAACTTTCTCTCTCTCTCTCAATTTAAACTGTGAAAGTCTTTTACTGATCATATGGTTTCAGCTCTATTGAATTGGATCCCACCCAGATTAAGCACTTTATAAACAAACTTCAGCATTGTCAGACCCCACAGATCATAATCACAACTTGTTGCCAGGTCTAGAGCTCTTCAGCATCTCCTGACCCCTGG…
Contig18773 137 reads, 652 bases	p2	(AC)5atataa(AC)6aaacacacgcacaaacacacacgcacaaaccacacattcacacacgcacaaacacacacgcacaaacacgcacgcacaa(AC)5g(CA)9aacatacattcacattcgcacatacaaccgcacaa(AC)5ataaacacacacataaacacacacgcatacacacacgcacatacacacgcacaaasacacatacaa(AC)8aaaa(AC)5	277	330	606	ACATGACATCATCGGAATATGATTTGGCTAGTGAATGATTTGTTGTAGAAGTTTAAGTCAATCCTTGCCTTTCAATCACACACCCCAATGCGTAGTGCAAACAAACTACTATGAAAATGAACCAAGGACAGTTTAATGCCAACTTCTGAGCCTTCTGGTCAAAATTACCGATAATAAAATGATTTTAAACATTTTATCTACCCCCCACCCCACACACGCACACAAACACACATAAACACACGCGCATATACACGCACAAACACACATTCACACACGCACAAACACACACGTACAAACACACATTCACACACTACCATACACACGCACAAACACACACACATATAAACACACACACACAAACACACGCACAAACACACACGCACAAACCACACATTCACA…
Contig18870 110 reads, 380 bases	p2	(AC)6	12	186	197	CACGACGCTCTTCCGATCTGGACGACCAACTATCTTAAGTTTTAGTTGACTGGTTATAGGATTTAGATTTAGCCTCTTCTAATATTGTGAGCCCACGACACTTGAAACATTTTGAACCAGATAATGACAAGCTGACAACAATCAAGGTTGAGGTAATCACACACTCAGCAGATGCTCTCACAGAAACACACACACACTATTCTCTCTGTAACAGAAAAAATGAAACTAGGAATTTACTTAGCTATTTTGCTTTTCTTTGACAGACTTATATGATAATCGATTTTGGCTGAAATAAATATTTATAAGTTTTTCACAGTAGGCTACCTAAGATGGACAGGTAATAGACGAAGCAAATGACATTATTAGAAGTTATCTTAAAA
Contig18959 314 reads, 695 bases	p2	(TG)7	14	627	640	GTTCATAGTGAGGTGATTTATTTGCCGAATCAGTTCTGATTCTCATCGAAGAGGGAAAACAACGAACAAGAAAAAGAAATCTAGAGAACACGCACATATACATGGAACAGTCCCTTGGCTGCGATTGATAGATAGTTTCATCTGGTGAATTAGGCACGTTCGCCGCGGATACGTCGCGCCAACTGGATGTCTTTCGGCATGATCGTAACCCGTTTGGCGTGAATGGCGCACAGATTGGTATCTTCGAACAGCGAGACGAGATAAGCTTCGCTCGCTTCTTGAAGTGCGCCGATAGCCGCCGATTGAAAACGTAAATCGGTCTTGAAATCTTGGGCGATTTCACGAACGAGTCGTTGAAACGGCAGCTTGCGAATCAGCAATTCCGTCGACTTCTGATAA…
Contig19050 18 reads, 350 bases	p2	(TC)10	20	78	97	CAGCTACTTAGCATTTTCACTTTATGTAGCCACCTATCAATCCTATTTTTAAATCCCTTATATTAACTTCACCGGCGTCTCTCTCTCTCTCTCTCTCTGTCTGTCTGTCTTGGGCTCGGCGGGCGGAAAAACAGAAGTCAAAAATGACCCACTTCCCATGATCCGATCGAACTGAAATTTGGCACACGGACCCGTCTNACCTAACAATGCATCGTATCAAAATTTCAGATCGATCGAACGTACCGTAATTAAATTAATGCATTTTTAGTTTATCCTTATATGAGGTATGTAATTCAAAATTCACTGTTTGTTATTGTTTTTTTTCTGCCAGTTTCACGTGAGTATTACCC
Contig19250 17 reads, 395 bases	p2	(TC)6	12	123	134	GATCTACACTCTTTCCCTACACGACGCTCTTCCGATCCCGGGCATGTCTTTTATAATATTTTCTGTCTTCTTCTCTCTCCCACTTTTTCACTCCTTTTATCTCGCTTTCACTTTCTAAAGTATCTCTCTCTCTCTATCTCTCAATTTCTCAGCAATGAATGGCGCCGTATTACTCAATAAATCAAACAAAATTCAAACACAGCCACTAACTGATCAAAACACAGCCACTAACTAATCCAAACACAGCCACTAACTAATCCAAACACAGCCACTAACTGACACATACAGCTCACCCATCATAGAAATATGCTACACCAATGCTACCCTGTTTACAATCAACGTGCACCCCCAGCCAAACAGATCGGAAGAGCGTCGTGTAGGGAAAGAGTGTAGAT
Contig19278 266 reads, 506 bases	p2	(TC)9	18	457	474	CTCGTAATTGTAAATTTTAATATTCAAATTGATACAGCTGCTCCATCATTCAAACATTAAAAGAACTAAGACAATATAATTCTGTTGCAGCCGGCTTCATTTGGTCCCGTTGCTGCCTTTCTGCCATCAGGACAACATCCGTATCTTGTGCCAGCACATCCACCTTTTTTGGCGCAGTTCTCTTTGTTGGGTCCGCCAGCAGGTGTTACGCCATCTTCACAGCAGCCCCACAGGACACCTCTACAGCCACCAATTATGTTCACAGGCCTACATCCCTTGCCATTTCTTCCTGAAGCGGCCGTCTTGCCATCTGGACAACACCCATACCTTGTTCCTCTACACCCGCCTCTTAGTTTTCGGTTTCGTCTCACTCCTCCGGTATATTCACTACATGCTAAC…
Contig1958 7270 reads, 656 bases	p2	(TC)8	16	576	591	AAAAAAAAAAAAAAATAGGGATAACAGGGTAATACTGTCAACGCTCTGTCGTCACCAGTTATCTTCAAGCTTTGTCGTAAATGGGCGATTTATTATTACATAATTATGGCGCAACGATCTACTATCAGGAAGGTGGGCACGATACCACAGGACATGGGGGACATGAAGCTCCACCTGCAGGTGGACACGGAGACGCCCACGGCGATGCCCATGGGGGAGGACATGGTGACGCCCATGGTGGAGGTCATGGTGACGCCCATGGTGGAGGTCATGAGGAGGGTGGCCACGGTGGCCATCATGGCCCCCCTGGACCAGGTTACTCCGGCTCTCAGGTGATTGCAGTCAACTGGTTTCTATTGAGTGTCATACTCATAGCAGTAGTTATTTCTCCACTCACAT…
Contig19615 127 reads, 732 bases	p2	(AC)7	14	64	77	CACCTACACACACAACACACACTCATGTACTCACACACATATACCTACACACCCAAACAAAATACACACACACACACTCAAACTTTTTTTCATAATTATATTCCATAATGTCCACACTGACTTGAAATGTTAGATAGATTCACTATATTCATGTACCGCGATCATCCATAGTGCAATTTTGTTTGAGATTCAACCGCATTATAACATTCCCACCTCCACCTTGGGAGGCCCCGCCTGCTGCAAGGCCATATGGTCATAATCAGTGCATCTCTGTCCAAGTCGTTCAGTATGCCTAGTGCCTCTATTTTATGGCTAGGCTTCACTCTAGGTAGGCATGCCCCTTATTTATGAAAATGCCAGTGGCTTGTTGAGTTACAGGATTATTGCAATAGAAGAGCC…
Contig19721 46 reads, 194 bases	p2	(AC)8	16	33	48	CTACACACCACATACACRTTTACACAGCACGGACACACACACACACACGCGACTTCCAAAACCCTTCTACACACCACATACACATCTGACAGCAGTGCCACACATGGCAGCACATTTAAGTCACTGACACACATCCTGTTAACAAGGCTCTGAGTAGCATGTCAGGATAAAGATGAGAATTCATTACCCTGTTA
Contig19760 36 reads, 208 bases	p2	(CT)6	12	78	89	GGGTAATGCTTATTACAACTTACCAAGGGTAATACACTCACTTTCCCATCGATCCTCTGCAAGCTCCCGAGCTTCGCCTCTCTCTCTCTTCGTATCTCTAAACCCGCTCACTTCGATCACCATGGTTTACCAATCCGCTTACTACTCGCCATTGGCTGCTCCAAGCTCTGGCTGCTCCAACTGCGCGTTCGGGCAAGCGTCGATGGTC
Contig19911 115 reads, 281 bases	p2	(CT)7	14	179	192	CTTCTTGACTGTCATCTGGGTTWTTTTTTTCTTGGCTTTGTTCTTTAAGATGATCTGAGCAAAAACTTGATTGATCTTTCTTGTCACACCTGCCATCTTTGACATCTGGTTGTCCGTCATGTATGTCAAATTCACTGTGGATGTGCTCTTGGCAATATTTTTTTCTCTCTTCGACGCCCTCTCTCTCTCTCTGACGCTTCCTGTTTTGTAACTCATTGTAAGCATTGGTCAGAAGAGTTTCAAGTTATGTCAGCTAGTGAATATCTTCCTTGGAATATTAC
Contig20050 10 reads, 187 bases	p2	(AG)6	12	111	122	ATCTACACTCTTTCCCTACACGACGCTCTTCCGMTCTCATGTCTCGGTGACCTCTGAGTGTGTACGTGCTGTTGATCTTGCCCAGGTTCCGCAAAAATTATGATCGATACAGAGAGAGAGAGAAAAAAACAGATTCAGATTATTCGCGATTTTGTTCTTCACAGGGTAATATTCACGGTCCATTCAT
Contig20184 17 reads, 144 bases	p2	(CA)10	20	90	109	CGATCTTTGGATTCCAAGATCTTGAACATAGCTGAGGTCTTTTGTCTGTATGTTACATTGTAATAACAACACACTCGACGAACAATCTGCACACACACACACACACACAGACGCACACTATAACAAAATACACGAAAGTTGTAA
Contig20434 98 reads, 309 bases	p2	(TG)11	22	57	78	CTCATTTCTTGTTGAGACCAAACTGACCCTGCTATGAACCTATCAATCTGTGACCCTGTGTGTGTGTGTGTGTGTGTGCATAGATTGAACCATCCATCAACATAAACACAATACCTCACAGCATGGGAAGTCACACAGATGTGATCCTAGAAAACTGACACAAACAAGACATACACATCAATAGAACTAATACATGGTGGATAACTGGTACAAAGTAGTACCCTTGCAAAACTTCATCATTTAGTTTCCTTGACGCGGTGGTCGAGTGGCAGCGCACTTGACTGTCGTACCGATGGTYACSSGTTCGAA
Contig20473 12 reads, 177 bases	p2	(CT)6ccctttntctgcttctgtctctt(TC)7cctttctctgcttctgtctctgtctctttctctacttctgtccctggtatctctgtctctgtcacgctccctgtctctt(TC)5tgtccctgtcacgctccctgtctctt(TC)6	176	1	176	CTCTCTCTCTCTCCCTTTNTCTGCTTCTGTCTCTTTCTCTCTCTCTCTCCCTTTCTCTGCTTCTGTCTCTGTCTCTTTCTCTACTTCTGTCCCTGGTATCTCTGTCTCTGTCACGCTCCCTGTCTCTTTCTCTCTCTCTGTCCCTGTCACGCTCCCTGTCTCTTTCTCTCTCTCTCT
Contig20518 91 reads, 350 bases	p2	(GT)8	16	123	138	ATCTACACTCTTTCCCTACACGACGCTCTTCCGATCTCGACAATTGAACAAATAATTTGGTATGTGTGACAGGTGTGACACATTTGGTGTGTGGGACAAATGTGGTGTGTGTGACACAGGTGGTGTGTGTGTGTGTGTCCCAAGTGGTGTGTGTGGTACTTCAAAAGCTGCTGACCATTCATTTAAATAATTGCCATCTATTCCTGAACTATTTGAACCCAAGAACAAATGTTTACATTTCAACAAGATGTGCATATTGACTGATTGAGACCAGCAGAGCCACTCTACAGGCCAAAGGGACCAGTAGAGTCACTCTACAGACCAAAGGGACCAGCAGCCTGTTATCCCTA
Contig20524 58 reads, 416 bases	p2	(CA)6	12	271	282	GCAGAACTGCTCATGAGTTGGAATWTTTTTTTKAGTGAAATTTGAAATTTAACTGAATGGTATCTAATAAGGGATTTGGAGCAAGCCACCTAATGAATTGGGAGCCACTTTACTTGTCGAATGGTTCGGTGAGGATAACTTCAAAACTTGAATCATTTCAAGAAATAAAAATTTAGAAGTCTCCATACTTCTAACAAGTTTTATACAATACCTATTCCAAATGATATTCAATCTTTACATGTGTTCACACTGGTCTACTTGTCACACTGTCACACACACACACTCTCAACAGAACACCACCATCAACAGGTGTCATCATTCAACAGAACACCACCATCAACAGGTGTCATMATACAACAGAACACCACCATCAACAGGTGTCGTAGATCGGAAGAGCGT…
Contig20613 97 reads, 368 bases	p2	(AC)8	16	258	273	ACACGACGCTCTTCCGTAKCCCCCATATCAATATTCCAGTGACTGATAATGTGATATGCTAATCCACTCAAGAAGGTGTAAGCACATTGACTCAGACACGATAACTGATCAACTATCACTAAAAAAAAATATGTGACAATCAATGTTCCCTTTAAGATGCATGGCCGCACAGATATCTAACAACAGAAATAGAATTACTGCACAGCAAATTTTCATAAGCAAAATAAAATATCTATGTTTGTGGAGTGTACAGTTTTACACACACACACACACAAAAAGGATGCTGTGGAACTTTGCACATGTTTTGTTTTATTTTGCACACAACTTTGGAGGGAACATTGTTGACAATTTATTGTTTCAGATCGGAA
Contig20847 55 reads, 200 bases	p2	(GA)6	12	78	89	GATCGGATCAAAAGGTTTCTTGAATAAGTATTCGAAAGCATTAAAGAGAAATTTGATTAATAGATGTGTGAGAGAGCGAGAGAGAGAGAAAAAAACCATGAGTTCTGTTTAATCATCATTTTCAGAGCTGTCAGGTTTGCCAGATATGCCAAAAAGATTACGAACGATCTGTCGCATGGCTGCAGCAGCAGCTCCGTAAT
Contig20890 42 reads, 299 bases	p2	(CA)7ctgccaccatgttc(CA)5ctgccaccatgttccacgcacattgccaccaagttccacacactgccaccatgttc(CA)6	106	179	284	TCATTAAAGAAACACAAGTACAAATACTAGTAAATTAAATTTATTCTATTTTTTTTTATTGATGTTTCATAATAATTTATATTATATGCTTTGTTTTGAGGAATCCCTGTAATAGAGAACTCCTGTGAGAGAAGCATTTAAAACCATTTCTCTCCTCACACACACTGCCACCATGTTCCACACACACACACACTGCCACCATGTTCCACACACACACTGCCACCATGTTCCACGCACATTGCCACCAAGTTCCACACACTGCCACCATGTTCCACACACACACACTGCCATCATGTTCA
Contig20918 241 reads, 954 bases	p2	(AC)7	14	200	213	GGGTAATCCTACTGGATAGGATAATTTGTCTTCCGTCCATGTGATTGTGCTCCGTGCCCCTACCTAATGTGCTAGGGCAATCAATAGTTGACCCCCCTTTGGTGCCCCTGATGTGCCCATGCAGGGCAGCTACTAGTCATATACTGTTGAATGTCATGTATACGTGACCAGGGACGTACGTTTGTGTCTTTGCTACAAAACACACACACACACAAAGTATGTTATGTTGTAATCAAGGATCGACAGTTAATGAATGACTGGAGTCCGTTCTGGTGCTTGGATAAATATTCTCCATCATTCATGTCCTTGTGCGAGCTCAAGGGAGAGGGTATTAATTATTTGTGGCCACACGTTGGGGTCCATCCATTTATTACGTAGGCTAAAATTCACATTTCAATC…
Contig21106 29 reads, 185 bases	p2	(AC)5tcaaacacacattcacacacgcacatacaaatgcacaaagacacattcacacacgcacaaac(CA)6	84	70	153	CACACGCACACAAACACACATAAACACACGCGCATATACACGCACAAACACACATTCACACACGCACAAACACACACACTCAAACACACATTCACACACGCACATACAAATGCACAAAGACACATTCACACACGCACAAACCACACACACACAAACACACATTCACACACGCACAAACACACACG
Contig21195 233 reads, 348 bases	p2	(GA)8	16	258	273	GACGCTCTTCCGATYTTCAGGCCTTAATGTGTTGTGTCTTTTCCCCTCTCCGCTATATTTGTATCTTGGCAGAGATGCACACGGCTGTCCAGATTTCTGTGAAATCTCCGATCAGATTAAAACTTATAGAACCACGACATAAAAAAAAACAAATCCCGTAGAAATGATCACACAAAAATTTGTTTCTGGTACGCTGCTGGCAGTGAGACTATCTATCTCTTGACAGTCTCAGACACCACAGGTCACAGCCAAGGGGGGAGAGAGAGAGAGAGAAGTACGAGTGGAGATTTCTGCCACACTGTACCACACGGCAGTAACGAATATTACCCTGTTATCCCTATTTTTTTT
Contig21328 87 reads, 366 bases	p2	(TG)6	12	318	329	GGGTAATTCCCCCTCTGGAGCGTGACGTACTTCATGGACGGCCTTATATGCGCCATTGCGAGGTCTAATTTAGAACCACTGACACCTGTAGATACCGGTGAAGAAGATGATGGCAAACAAGCAACACGTGGATTTTTTGAGAACCCAAAAATTTTGGAAATAGATATTGTGAAATGGAATGTGTTAATTAATTTATAACGTATATCTATCCCACAGTTCACGTTTAAGCAGCATGTTAAATTACTGCAAGGGACCATTGAGTTATAGTTGTGCGGTTTGAGAATTTTCCACGAAACTTAAATTTTAAAACAAATATTTGTGTGTGTGTGCGTGATGGCGGAAGAGCGTCGTGTAGGGAGAGAGTGT
Contig21349 142 reads, 718 bases	p2	(CT)9	18	585	602	CTTATTTATGACATTAGACTTTCAAATATGGTTTAACAAATATTACCCTGTTATCCCTAGCCCTGGTTGATGTCGCCATGACAAGTTCTGGGCGCTGCTTGTTACAACATCATTGACAGAGCCACATTAATATCTTTAGTTAATATTGTAGGTCAGGGGCAATTAATTCATGGCAACAAAAAAAAAGGCAGTAAAGATGTGTATTTCATATGACTTTACAAAAGCAAAACACTTTTAAGAAAAAGGAGACACTTGTGGATGACTATAGCTTCAAAAATAAAAAAAAATCAAATGTGATATAAAGTCAGGCAAACATGTGAAAACTTTCATCTTTAATGCACATTAGGTTACCATTGTAGGCTGTTTCAGTTGAGGACTGCCTAAGAATTGAACAGTGCC…
Contig21532 216 reads, 806 bases	p2	(CA)6	12	145	156	GTTTTTAAACAAGTTGGAAAGNACTNNNNTNTNACATCNAACAAGANAANTTNNTAACAAAAATAACAGATAACAGCAATTAAAACACGCAATGCAATATTATAGAAGGCAATTTCAGAGATAGATTTCAAATCAAAGAGATATCACACACACACACGCCTTCCCACACACCTATTCACTTTTGAACATTTGATTGCATCATTGGAGCTAATGCAAACTGTGCAGCATCTCTGACTTCTGTAATCTGTTTAACTGCCTCGTGCTCTGATGTGTACAGACTGGTAAATAGACTCAGGCATTGCTCAGCTATGGGCAGGCACTCTCTGAATCTCTCTGCATTAAACAATACTTCAGCCAGCTTCTGCAGTTCATGGGAGTACTCCACACTCTTGTCACCGT…
Contig21559 62 reads, 135 bases	p2	(AC)7	14	95	108	CATTTTGACCACTCCCCCCCTTTCCCGATACCACACTAAAATTTACAGCAGTCATCTATCACCACCATTTTTCTCTAAAAACATTTATGTATATACACACACACACACAAATAGCTGAGGCTAGTGCAGATATTC
Contig21565 13 reads, 141 bases	p2	(AC)6	12	71	82	CAAAAGGTCAAGGTCACCTACATGCACATTTTAGTTGTAGTTGTGAAGCCAGATGTCTTGAAAAAAAACAACACACACACACTACTGTCCTCAGGCAAACAACATCTGTTACAGTCAAGAAAAATCAGATCGGAAGAGCGG
Contig21699 248 reads, 671 bases	p2	(AC)6	12	225	236	CGCTTGGCGGCTCCCACAATCTCCACGGGCGCGCTGTCCGCCTCAGCCTCAACGTCCTCATCGGTGTAGTCCTCCAGGACATTTCTCAGCGCCGGCCACCTTGACCTTAAGAGCAATGTCAAGAGGTTGTAACCTTGAACTGGTTGCCTTGATGAAGGACTCTGAAGAAAATAATCACCGATCGGTTCCTCCGCAGGAGTGGCGCCACGGTTGTTGTGCTGTAAACACACACACACGGAAAATGTCACAGTGAGAATGAGACACATCAAGCCTGGAGTGAAATACATGGTGGCCTTGACCTCTGCTTGGCTGACACGCACGACTGACCAAGGACTGACCGCTAGTTTAGCCGCCTTGACCGCTAGTTTAGCCGCCTTGACCGCGTGCTTCTTTAAAAAT…
Contig21763 83 reads, 497 bases	p2	(CA)6	12	288	299	TCCTGCTGAACCGCTCTTCCGATCTTGTTACTGTGTCTAGATGGCTAGGGCATTATTACAACATATTTGTTACTGTGTCTAGATGGCTAGGGCATTACTACAACATATTTGTTACTGTGTCTAGGATTTAATATGTTCTGCTCTTCATTTCACATGGCTGAAATGTCTGGGTATTTTAGCAGTGAAAATATTTTGTTCATGTTCAAACTATTAATATACATTACCCCCATCAGGTGTAACTTTGATAACACTTTGGGCCAATCAGGCTTGAACTCAAATAGTCACTTCACACACACACAAGCAAGGCCTTTGTTGACATAACAAATATGCTCTTCTGGCCAGTGATAGCCACATGATGTGTACCTTTGTTAACTTTAACCTTAACTTTGGCACATTTGA…
Contig21815 126 reads, 456 bases	p2	(GT)6	12	137	148	GGGTAATATAAATAAATCCCTAGATGATGCCCCTTTGATGAGTTTGCCGTGTGAATGTTGACAAAAAAACTCCTCTAGGACTAACACTGAATGCCTATTTTATACCTGGCAATGATATTGGCACTGGATAGCCTTGGTGTGTGTGTGTGCTGCTTGCAAGACTAATGCATATATCCTAGGGATGTCCCATTTGATAATCAGTTACATTTGTTGTGCTGAAAGATAAAGGGGCCTATAAGTTTGTACAAGTTAATAGTAGATATGCTTTATCAGGGTATGCCAGACTTGACTGTAGTGTACATGACAACTTGAGTGTGGCAATTTGTAAATGTATCTGCCTCTATTCCCCCACCTCTGATTCTATAATATATTCATATAAATATCTGTACTTGGCATCTA…
Contig21841 145 reads, 724 bases	p2	(AT)6	12	696	707	ATTACCCCATGAGTATTTCCATTTCAGAAAGATTATCATATTTTTAACTTGGTCTTCTTGTAATTGAACTATTTGTACAGCCATGTTTATAGCAGTTATTCTTCAAGTACATGTACAAGAAAACTCATTTTTGATATCTTAGAAGAAAACAAAAACAAGATTGTAGAATAGAAATTTCTTATAGTTTTGTGTGTGTGTTCACTTCATTTGATGGAGTTTTGTTTCTCTTTATAGTAGATGTAGTTGGTTTTGTTTTTGCTGCTTGACTGACACAAGCACAACTCTTCATTTGTCCAAACAGAAGTCATGCCTTTACAAAATACACTGAGGCTTAATAAATCTTTGAGGAATGTTGCTTCTAATAAGAAATGTTGTTGGTTTTTGTAGAGTTTTTGTTTG…
Contig22037 10 reads, 199 bases	p2	(GT)7	14	92	105	CTTATTACCCTGTTATCCCTATTTTTTTTTTTTTTTTTATGCATTCTGGAGTTTATTAAATAACCACAATCATTCATATCGCAAACGATTGGTGTGTGTGTGTGTGCGTACGTCCCTTCACGTGCCTTTGGTGTGCGATACTCTGTGAGAATAGCCTCGGATCTCGATTGCGTGCGCGTGTGTATGTGCCGGATTGTTG
Contig22329 23 reads, 257 bases	p2	(AT)8	16	28	43	CAAACATCCGCCATCTTACATTTATAAATATATATATATATATTTTTGCTCTAGGTTAACACTTTACGAAAGCAAAATAGTTTTTTCAAATCGACATGCAACAGCTAAATTTGATTTATGCTGTATTCGCCATTTTTCAAGGCCTATCACTATCTGACTGTTCCAGCAAATAAATGTGACAACGGAACCTTAAGATATAGTTGCACGTTTCTAGGTGGAAAAACAGATCGGAAGNGNGTCGNNNAGGGAAAGAGTGT
Contig22339 14 reads, 134 bases	p2	(CA)8	16	97	112	CTCTTCCGATCTCGCTCACACCTTCCTTAGTGTCTGCCTCTCACACTGACTCACCAGAATACTTTGGAACTTACAATGGATAAACCCTAAAAAGMGCACACACACACACACAAACATACATTCACATTCGCACA
Contig22432 163 reads, 456 bases	p2	(CA)6	12	1	12	CACACACACACACCATGACTAATGACAGWAGCTACCTGAAATAGACAGCACATCACACTGGCCGGTGAATGAAGCTACCTGAAATAGACAGCACATCACACTGGCCGGTGAATGAAGCTACCTGAAATAGACAGCACATCACACTGGCCGGTGAATGAAGCTACCATAAGAATATCACACATCACCATGACTAATGACTGTAGCTACCTGAAATAGACAGCACATCACACTGGCCGGTGAATGAAGCTACCAGAAAAAATGTATTTCGAGACCTTTACCCGGGTTGGCCCGGCCTGTAGTAACTGAGAGCCATTTTAAAAATAAAAATTAAACAATTGTTAAGAGACGCATTGAAACACTAAGGGGTCGTTAAACATGGCATGGAAATCTTTCATCTAT…
Contig22566 61 reads, 339 bases	p2	(CA)6	12	179	190	TTTTATTTGAAAGCCATACCTGCGTTTATTTTTTATTTTTTTTAAAGAAAATTGTTTTTATTAAAAACCAGGTATGGACACAATAACCTGCTTCCACCCATTTCTCAATGCCAGGCATCCCCTGGTCATCATGCTCACCACATCAGGACAAACTGACCATTGCGTCCCCCTATGTCCGCACACACACACATACATACACACACGTGTTCTGTCATCAAACTGTTTTGTACAACTAAGTCACGCCGAGAACCATGTTCTTCTGTGTATTTTAGAGATAAAACAATTGAATAAATTGATATTACTATTGACTTTCAAAAAAAAAAAAAATAGGGATAACAG
Contig22828 35 reads, 185 bases	p2	(TG)5gatatctgttgactgagtggatgagggcttcatggaccaa(TG)5gatatctgttgactgagtggatgagggcttcatggaccaa(TG)5	110	46	155	GTTGGATTGGCCATTTACTGAGTGTATGAGGGCTTCATGGACTAATGTGTGTGTGGATATCTGTTGACTGAGTGGATGAGGGCTTCATGGACCAATGTGTGTGTGGATATCTGTTGACTGAGTGGATGAGGGCTTCATGGACCAATGTGTGTGTGAATATCTGTTGACCGAGTGGATGAGATCGG
Contig22838 287 reads, 843 bases	p2	(TG)6	12	773	784	GGGTAATCTTACTCGTTCGCGTATCCATCTGCAGTGCGATCATCGTCGTGTCCGTCGGAATGACATCGAAACTTCTTCTCTGCAGCGCTTTGTTCTGCTTGATCGTGATCCAGTTGGGTCTGATCGAAGCCAAGATTTGCTACCAGTGTGACGACAAGAACCCCTCGAAATGGTGGAAATTCTGGGGAGAGAAAATCACCAAGTGCAACGGCGTTCCCTTCGAGAAATACGCCACGAAGACATCGAAGGCGTTCGGTGCTGATGTCTTGACATGCTACACGAAATTCGACGAAGCCGGCAACATTATCAAGCGTAACGCGTATGGCTTCGGCGAAACCTTCGACAAGAACTTCAAGTGCCAAGATCGATTTCACATCTGCTGCAAGGGACCGTTGTGCA…
Contig2284 2854 reads, 1585 bases	p2	(GA)6	12	663	674	TGAAAAGGTGTGACAGTGAATTTATCGTTTGCTTATACCCTGTTATCCCTATTTTTTTTTTTTTTTTTTACAAGGCCATATTTTAATGCACAAGTGCTGAAAACAGTTTACATTTGGACATATGAATGGACTTATTCTTTAGTGTGATGAACTCTTGTTTTATATTTTTTATACACGTGCATACACATTTCTGTACAAGGTTTCAAAGGTTACACTAAGGGTGACGTGAACTTGACAAAAATCCCTTAGATGCCCGAATCCGGCCACTATAACTCGCCAGTCCTGCTAGCAGGGGTTAAAAAAATATGTCACGGCCCAATAGTCACAGATCAAAGACAGTTTTCTTGAGCCATCAAATGATTTCTCCTCTACGTAACCGAAGACACGCAGAAATCCTTG…
Contig22975 74 reads, 612 bases	p2	(CA)5atcatacaaacatacaaaatcagccatacacgcacacacatacacacgcacgcgagcacg(CA)5	80	3	82	GTCACACACACAATCATACAAACATACAAAATCAGCCATACACGCACACACATACACACGCACGCGAGCACGCACACACACAAGCCAAACACATACATACCACATACATGCACGCCAACAAAAGATGAAGTATTACCAGCAAGTCAAAGAGGGAAAGTATATCATGATGTGCCGAACACCATCTTCTTTAGAGCTGGAATCACGAAAGCAAGAGGACCGAGTTCAAGCTCTCTCAGCCATTGTTGATAGGCTCAATTCAGAATTTCCTTTTGCGCAGCCGTCTTTGAGAAAGGTGTATGTGGCCCTAGCATCACGGACAGGAACAGATGACTCTTAACAACACATCCCAATTATTACATTTTTCCATAAATTCACTTGCATTATTTACTCTACTGTATT…
Contig2300 791 reads, 1441 bases	p2	(TG)9	18	1333	1350	GTTTSTAATCATTCCTGTGTAACGAGCGCATGCCATTAGTAATACAATGAATCGGGAATCTCATATTGTCTGTTTTGACGTGGGGGACCTATCAGACTGTGTGGACCAAACTGGACCAGATAGGACACTAACACTCCACTCAGTGGCCATCTGATTGATTTGAAGCCGGTGAAGACAGCTTTGAGGCATCAGACCAAAGTTTTAACTCAAACTTGGGGAAAGTATGTCTGAAACTGAACACACCATCGACGTCCTCGTTTTGGGAGATGAAAACATTGGCAAGACAAGTCTGGCCAGAACCATAACCGAGGGAGCATTTCCTATTGCTGATTCCTTATCTCCCTTAAACATTGAAAGTGCGGTTTTCTGTACCAAAAGTGAGACGGACCTTTTGGCATT…
Contig23198 45 reads, 285 bases	p2	(TC)11	22	196	217	TGGATATCATCATTATCATAAATACCTAGAGTCATAACAGATTTCTGTATATTTACAACCTCAAAACAACATCCTTCACATTCCAGCGTCGCCTAGTCTGTCTCTCCAAGATACATCCACAATCCACATAGCGCTCTGTTACTTCGTCCTCAAGCTATCTCTCTGCACTCTACACACTCCTTCTACCCCGGCTATTCTCTCTCTCTCTCTCTCTCTCTNACACACTCTTTCNATTTAGTTGAAAGAATTGAAATCATTGGCATCATCAATGTTGAAAGCGGCAGT
Contig23232 66 reads, 330 bases	p2	(AT)7	14	24	37	CCAGGCTCAAATATGAAGGATCAATATATATATATATGCCAGCTATTCAATCTCTCTGTTTATCCTTGTATAAAACCCAAATTGAAAGAAAACAAAACATCCCTGCATTCCTTTCAGCTATAATTCTGTGATCAACAGTTTTCTAATAGTTTTCTTTCTTCTAATTTATAAATTATAATTCCCAAACATGACCTTCTGCCACACCACACACCCCCCACAACAGAGTCACAGACATCATTTCTATCTTAATGACCAACACCTCAGGACGGGACCAGGCCGGCGTCTCTGAGTTTCTGGACCAGCTCCTCGACGCTGCATTACCCAGATCGG
Contig2332 4711 reads, 1194 bases	p2	(CA)6	12	1146	1157	AAAAAAATAGGGATAACAGGGTAATGCAGTGCGTCTTTTTGAAGAAGAAAACAACGATGGACTTTGTGCTGCTCAATACCATAGTGGTGCTCCTGTTAGCATCCCGAGTAAGCGGTTTTCAGTTCACCGCCCAGCCAGCCAACATCGTCATTGGAATAACACCAAGGCTCGACATCAGATGCTCCCTGAGTCCTGGCACCGACCCAAACCTGTCAACTTTGGTGTCCATCTTCATATCACGCTCCAACGACCCCGAGAACGTGGCCTTCCAGGAAATCGCGTCCATCAACAAATTCTCCGGCAGCCTCGTCGACATCACCCACGGCAACGCGAACCTCTCCGGCGTCATCAGCAACACCGGCGGCGAATCTTTCATCTCCATGCGATGGAGCTTCCCGG…
Contig23355 80 reads, 443 bases	p2	(TG)7	14	82	95	GATTTATTCAGTACCACATCTGTTGAAGAAATGCATACCACCCCCACTGTTCATATAATTCACGCTTCTTTGAGGCATGTTTGTGTGTGTGTGTGTTGGACATTCTGCATGCTAATAACTTTTTGAATTTATTATCTTTCACCTGTTTTTTAATGGAAAAAGATGAGATTTTTAATTATTAGTTTGCTGCCAAATAATCTCAAATGTAAAGTAAATATCTGTGTTTCATCATATCAGAGATGTGATTTCTGGTTGGCAGGATAAATGTGTTCAGCTTAAATAGAACTTGCAGATGCCCAGATCAAATGAATGACTCTCAAACAGATAGCAGGAGTTGAGGGCCACTGTACAAAAACACCAATTAATACTTTGAAATCCTTCTAGTCGTTGGTGTATTGT…
Contig23455 42 reads, 265 bases	p2	(TC)8	16	157	172	CGCTCTTCCGATCTTCTCTCTCTCTTATTCTCTCATTCACGTCATGACTATCAGATCTCCTGTCACATCCTTGATCATACCAACTTATTTTCTTTCCTTCTCTCTCTTTTATCCATAAATAAGATGTCCCATGTACTTTCGCTTACCAACTCTCATTCTCTCTCTCTCTCTCATTCACATCCTAACATTACAACATAACATGTAACAATAACTCGACARACGGGTCCTGAAGTAGAATTTTCACAGATCGGAAGAGCGGTTCAGC
Contig23631 74 reads, 397 bases	p2	(CA)9	18	314	331	ATGTCATAGGCTCCCTTTTGCTATTTCTTTACATGCTTTATTGATTTTATATTTTTGAGAGCTCTTGATTGCTGTCTACACAATATAATTACTGGTATTGTCTCCCTTTTTCAACAAACTATAAAACCAAAGGCATGGCTCTAGGCAAGAAAAATAAGATAAATCAACTTAAAAATTTTTTTCTTCAGTTTGTGACATCTTTGATTCCCAATCAGGTGATTGTCTTAAGATTCATTCTTCAATCTACCAACATTTGAACATTTCAGAATTAAGTGTTCTGCTGTAGTGTGGATTCATTCTTGCTTGTCCATCCCACACACACACACACACAAGGTTGAGAGACACTTACTTTTCTAACCCATGCCTTGGGGGGAGCTAACCCTGTGCCCACCACCCG
Contig23650 102 reads, 492 bases	p2	(CA)6	12	193	204	AAAAGTTTTAAATGCTTTTTTTTTTTAAATGAATACTCATACAAGCCATTTTCGTATGTGTCCTGCATCCAAACAGCTGGACGAACTCTCATGACAAGGAAGATAGGAAAATAAGTTATGTCTTAATCAAAGAGAAATCTCTACAGAGATGAACAACAGTCGGCCACAAAGCCAAGCGCTTGAAGTAGGAATCACACACACACACGCACGTATTTACCTTTGATGCCTCTAGACATTGTGACCGCCTCCCTGAGGTTGGGGAAATCACTCTCCTCCACTGCTGCAGAATCAACAGACTCCTTGTTGAACGCATGTGCTGATCTCTGGCCGGCTTGAGATTTTCCTGGCAACATAAGGATTTGAACACATTTTATTATTTTTTTCTAAAACTTTCTTTAT…
Contig23677 18 reads, 218 bases	p2	(AT)6	12	195	206	CTATTTTTTTTTTTTTTYTGCCTTTGGAACTGATCTGACATTTGAATTTTGAACTTTCTGTAGTTTTTCAATGCATTTTTGGCGTACCTGACAGAAGAGAATTGCAGTAATCCATACGAGCTAGAACAAGAGCACAGACTAGAGTTTTTGTTGCACTAACTGTTAAGCAATGACGGAATGAGCTGATCTGACGAATATATATATATAATGGCTCTGGC
Contig23891 50 reads, 263 bases	p2	(AC)7	14	115	128	CTACACGACGCTCTTCCGATCTGAAAATATAAGCCAAATATACAGGGTAAATAACATAAATAGAATACAAGTCCTTGGTTACTCATGTTTTAAGACAGCTATGTAATACACCTGACACACACACACACTAATCATACCATCAGAAAATTAAGTCCCAAGATGTTTGCAAGGTGCATTACTTTTCATCCACAAGCCTACTTATTTCTTTTCCAAGTATGTCCCCCTCAAACATTCATACTAGAGCGKCGTGTAGGGAAAGAGTG
Contig23899 44 reads, 276 bases	p2	(CA)9	18	57	74	TAAAAAGTCAACACTGAAAGTAAAAGTGTTTATCAGACATCCACATTCATAATGGTCACACACACACACACACAAATGAAATGGGTTATTTGCCAGTAACCAGAAAGTTCTGTTTGAGATTTTTTTAAAGTACGTAACTCCGTGTTTGTACTGACTATGTGCAGGCCTAATATGTCAATTAATACATTTATATTTATAGAGTACCGATGCCCATCACCAACTGCATGCGTTTCTTTACTTTTCTGTCGTTGTTATAAATCTTAATGTGTATCTAAT
Contig24098 34 reads, 347 bases	p2	(AT)6	12	319	330	AAAAAAAATAGGGATAACAGGGTAATAGTGTGTTGCTCTGTGAAGTGTATCTTATAGCAGTGTTCCTCACACCTGTGTACAGGWGGTAGATTGCCGGGACCAAGCGAGGATCAATTGAAACAAGAGATGCAGGCCATGAATTGGATGACGTGAACATACAGAGAAAACTAAATCTAGATCGTTAGATTTTGAAGTAGATTTGAACAAGTATTTTAAAAAATGACTTTTATTTTACATTCATCAGCACAGTAATATCAAGTTTAATCAATTAATTCTTTAGCGTTTTTCATTAACTATCGTCAACCGTTTTAAGAGATAATATATATATATTAAAATCTATTTTTTAT
Contig24129 107 reads, 314 bases	p2	(TG)8	16	27	42	YTTTTTTTGAGGTGTGTTTGTATGTTTGTGTGTGTGTGTGTGCGTGCAGAGTTGGTGGATGGCGGACAGGGACGTATTGGGCTAACACGTCAGACAGTCGTCGACGGGACTGTAAAGTCTCAGATCAAACACTGAGTCCTTATCAATGATCTTCCCCCACGTCACTCGACTTCGTGTTCAACAATACAGTTCGAGCCAAATGCCTGAGGTTAACATCTAAGGAATTTCAAGTTTCATTCAAGTCTTCGGACCAACTACGTCTAACAGTGTAACAGAACTGACGTATGCAACGGTACACCGAACCTTCTCCCTCG
Contig24225 13 reads, 242 bases	p2	(AC)7	14	193	206	GACGCTCTTCCGATCTGGGTAATATTCGTTACAACAAACCTGGAGGCGTGCTCATGAATCGGACACCTGTCCTSAGCGAAGAACAGCAAATGTATTCGTTACAACAAACCTGGAGGCGTGNTCATGAATCGCCCCAAATCATCTTACAATTGTCCAACACATCATCAAACACACGAATATTTTATTTCACATACACACACACACACAGAGCTCCCTTTCGATACCCAAGACTCAAACACAGA
Contig24243 114 reads, 675 bases	p2	(TG)7	14	462	475	CCCCCCAAGGAAACTAGTGCCAGTGACCCCATGACGTCCTCAGTCATCCTAGATCAGTCTGGTTTCACAAAGGAGATTTTTAACCAGGGAAGAGATGATGAAGACAAGGACGAAGACACTTCCATCCACGGGGGCGACGTCGGCGGAGTACCAAAGTCTTTCGAGTCAAGACACACTGTGACCAACGGCGTCAGCAGGGACTCTGGTGATATAACTTTCTCCATGTCTGCATCCAAGTCTTCGTCAGACTCCTCACCCGCTGATGCAATCTCCAACAAATTCCCTATGTCACTCATGAGCGACTCTGCCTTGGGCTCCAGCATAGAGCCGCCGATGGAGGGGGAGTACCCCGCCCCTGGCATGATGTCACAATCATTCATCGTCAATGGGCACGGTGAC…
Contig24328 19 reads, 278 bases	p2	(TG)6	12	154	165	CGTGGTGCAGCTAGCAGGGGGATAACAGGGTAATCAATTGAAATTCAGGTGCTGAGGTTTCCACAAACCGACAGAAATTGTCAATGTTTTCATTTTTGTGTTTACGGGTCAGTCGAAACAATAACATATTTCTGCAGTTTTTATTGTTGTTTTTGTGTGTGTGTGCAAACCTGGCATTGAGAATTTGACAGATTTTACCCCTGATGGTACCTCCTACATCTACGCCGTTTCAATCCGCCAATAGGGTTCGTGCATTTCTCATGACCTGAAAAATGTCA
Contig24411 129 reads, 503 bases	p2	(AT)6	12	89	100	CCTGCTGAACCGCTCTTCCGATCTTGGACATCAAATATTTAGAATCAAACATCTTCATAGGCTGGGTCAAAATTGTATCTTTAATCTCATATATATATATAAAAAGGAGAGCTGAATTTAAAGTTGGTTTTGTTTATCAAATGTTTCAGATTAGTTTGTTTACACTTGGAAAGACAGTGGCTAAGTGAAGTTGCCTCCACTTCTTGTTTCCTGTTGCTTGAACCCTTCCTCCATAACATTCAGACTAGATTACAGGATATTAAACCAAGGCGTGACTACAAGGCTGACATCAAGTGATCCAAAAGATTATGCATTGCTTGCATACAACAATACATTTGAGCTATGAGGCAACAACAGTGGACGAAGCAGGGGAATCATTGTGTATGGCAGCATAAAGAT…
Contig2444 2920 reads, 726 bases	p2	(TA)7	14	691	704	ATTTTGAAACYTTGAGTTCGCAAGAGTTCCTAGCTGTGGTCAGCCTCCTACAGTACAGCCGTGGATAGAATATCTCTTTAGTAAGTGGTAAAATTGAACAATATGGAATCATTGTTGTCCGGCACGAAAGACGAGACACCACATGGGAGGAAGGTTCCTTTCCTAGCATCAAGAATACTCCAGTAAGTCTTCTTGGCGGTGGTTCCCGTCACGTTGTTGATGGTGTTGATGAAATAGCCGAGTTTGCTGTAGTAGGTGGCCGTGTAGTTAAAGGCACCATTGGTATCGGCTGCGGCGTTGAGGAGGTTCACAAGCCAGGTCTGGGGCTGTTGCTTGAGAGGAACCTGAAAATTAAAGAATGGCGCCTGGAGCTGGTTGTTGAGACTCAGATACACTGTG…
Contig24643 60 reads, 372 bases	p2	(CT)7	14	61	74	CAGTCCTAACTACATAAGCCTTTTCCCCACTAGCTCACACTACTAGTATCTTGGACCGCACTCTCTCTCTCTCTTTCTCTTTATCTCATCAGTCCTGCAAAGTTCTACCCTTAAAAGATAAAATTAGGTGTTTGATTCTAGTCTGTTACCGTTTGATTAATTCTCTGATTAACCCTCGACCCTAATTTCCCACTACTCTTTCCCTTGGTTTACCGTGACTTGCCTTTGGGTTTACCGTGACTTGCCTTACAAGCTTCTCTAATAAATAAATCACTCTTTCTGGCCATAAAAAGTCAATTGTCTCCTAATCATTCTTTTCTACGAGTCCCTTTACAAGATCGGAAGAGCGTCGTGTAGGGAAAGAGTGTAGAT
Contig24734 102 reads, 475 bases	p2	(GA)6	12	429	440	YACAAATACATTCATTGAATTTTATGAATGCAGACCTAAACTTTGCTTACAAGTATTGTTAGTAACATAAGTTATTAGTTCAAAGCCCTGACTGGTATTTCGATTAGTTTATACAATAGAAGGGTTGGACTCATTTAAAATAAGTTATACACTTGACACCATAAATGTCTTTAGGGCTTGATGACAAGCTTTTGGGGGAAAAGGTTCACTATTACTGCAGTAGCAGTGAGGATGAAGGGGGTGAAAGCAGTGATGCAGAAAGTGGGGATGATGATGAAAGTCAAAAGCATACTGTGAAAGAATCCTCCTCCTACTCTGAACCCCTTCAGGCAGAGAAAAATGGTGTTGCCACAAATACAGGCCCAAAGGGTGTAATCAATGACTGGCGAGAATATAAAC…
Contig25588 29 reads, 329 bases	p2	(AC)6	12	191	202	AAAAAATGGAAGAGCCCTACACCTTTCCCCTTGTAAAACGACAGAACCAAGACAGAAAGTGGTCTCGTGTCGTTATTAGCCCTTCATTCTCAGTTTGAGAGTGAAGCTAATCATCGACACGTGATCCCAAGAAAAAGTGATCTTTAAAACACATACTCCCATGCATGCACAAACACACCCATGCACACATACACACACACACCCATAAACTCACTCACGCGCCCATACACTCACGCACACGCCTATAAACGCACGCACACGTACACACCTGTACGCACTCACATATAATCACATACGTGCACACGCTCGTTCCCTCACACACTCACACA
Contig2597 2267 reads, 1347 bases	p2	(TA)7	14	1123	1136	CTGGACGGTCGGGTTCTCGGGAGATTGTTTATTCCCCAAGGCTGGCATCTCAATCGGAACTAAAGGTTACAAGCGAATTGCCCTGCAGCTTCACTGGAACAACCCAGACAGTAGGAGTGACTGGGTGGACAGCTCTGGCATGTTGTTATACTACACCCCACACAAGCGCCAGTACGAGTCTGGTGTTCTCATAACGGGTGTCCAAAAATTCATCCTGCCGCCAGAGAGACAGCGGTATGACCTGACCGGAACGTGTCACAGCAGCTGCACCCGTCAGTCCTTCAAGGGAACCGCTTACATCACATCTGTCTGGAACCACATGCACTATGCAGGTAGGAGCGGCACAGTTGAACTGATTAGAAACAACAAGTCCGTCTCCTTCCTTATTAACGAGACCTT…
Contig26627 20 reads, 160 bases	p2	(CA)9	18	47	64	GCTGAACCGCTCTTCCGATCTCCGCATTTAATGTTTAGGACAACACCACACACACACACACACAACTGCACTCATGCATATGGAGAAACATATGACACAAATGTTCTGAAAGACATCAAAATGTACAATAAAAACCAAAGAGTTCAACATGAGACTACAG
Contig26653 14 reads, 270 bases	p2	(AT)6	12	54	65	TATACAATCNCTTGTCCATGTGTCATCTGAGACCAGCCATACAAATATTAAAGATATATATATATTAATGCAGTGACAATTGACAAGGGTCAAATATAGGGTGACAGTTGTGAGTACAGGGGACAGCATGAGAATAGCTATATCTTCATGGATAATGTTCATATCTTTCAGGGCTGTCAACAAGATTCATTAGGGTAGGACTGTCAACAAGATTCATTAGGGTAGGACTGTCAACAAGATTCATCAGGGTAGGACTGTCAACAAGATTCA
Contig27028 76 reads, 382 bases	p2	(CA)8	16	172	187	AAGATTATTTTTAAAAGAACAAGGGAAGTTATTTCAAATATTGAATTGTGAGTTACAGTTCATGCTCGGAAGACAAAGTTAAAACTAAAATAACAATGTCCAGTCACTTGTGAGCTTAACTATACCTGAAAGTAACAAGGCCAGTAACTTTTTGGATGTTTGGATCAGTTCCACACACACACACACATGTAACAATTATGTAAGCAATAAACACTCCTCTGTAGAATCACTTACATGGCCTAGCAGCACCAACATGACCTAACAGCACCAACATGGCCTAGCCTAGCAGCAGGAACTRGCNNNANCGACAGGAWCTAGCAGCACCAACATGGCCTAGCAGCAGGAACATGATCTAGCAGCAAATTRCYYACATGGATGCTCT
Contig27053 52 reads, 248 bases	p2	(AG)8	16	225	240	TCTTCCGATCTCAAATGTTAACTTACGCGCTTTTTGTCTAATCTAAATGAATGTTTTAGTTTTGTGTAACCGGAAATGCATATTTCGGCATTTAATGTTGCMAGCGCAATCTGTGTAATATTATATGCTCATTGAAGAAGGATCTTTGCCGAAACGTTCGCTGTTTTGTGACGTCTTGTCATTCAGGCTCACATTACCCTGTTTGCACGTTATCCATCTACTAAAGAGAGAGAGAGAGAGWTTGATTG
Contig27137 58 reads, 485 bases	p2	(CA)10	20	86	105	AAAGCAATGTTTACTTTGTCTGAAAGGACACAATGTTTAATGTTTGATTTGGACATTTTGTTTGCTACAAAACTGTGCGTGAGTCCACACACACACACACACACATAAACAGTTTACAGATAGATATCCTGTAATGATATCAGCACAACACAAGTTCTTGTACCAACATTTAGTATATACAATAGCAACAAATAACAAGCTATCAATTTACACAAAACTCTGCGGGAAAATTGCCAAATGTGCTTTATCAAAAAGTGAAATGACAGTTCAATGTTTCAGTTTGTAGACATACACTTGATTCATACAACTGCTGTCTCTGATGTTAGACCAATTGAGGAGTAGAAGTCAAGAGTCAAGAAGAGAGATATAACAGCTCAAATAAAACATAAAATATTTCAT…
Contig27141 47 reads, 224 bases	p2	(TC)6	12	31	42	GGGTAATGCTTATTACAACTTACCAAGAGATCTCTCTCTCTCTGTTCCATTCAAACCAACCAACCGTTGAATAATGGCTGACCAAGACACCGCTGGTGTAAGCGCTGCCGATTTGAAGAAGAAGCGCACGTTCCGCAAATTCACCTTCCGCGGCGTTGATCTCGATCAACTGCTCGACCTGAACACGGAACAGCTCATGCCGCTGCTRCACTGCCGCGCCCGTC
Contig27252 45 reads, 495 bases	p2	(TA)6	12	39	50	GATCTCTTTTGCCTGCGAAATATAGAAGTGTTCACATCTATATATATATATCTGTGCAATAGCAACTTCAAACTAATGGCTTAGCATGTACACATTTTTACTTTCTTTCTGAACAAGATTTAACAGTAATTTCCAGTAATGGACAGTCTTTGATCTCAACAGCTTGGCATGTATGCTACAGCATTAAGGATTTGATGGCATCAAATGTCACTAAACATTCAACTGAACAAGGGAAAGAACTCCCCCCACCACATACTTGGTCAAAGAGATCAAATTCACAGCTGAGACCAAAGGTTTCATTCATTCACTTTCACCAGACAAACCAAGACTTGTCAACTTCTCAAGCGTAAAGCATGACTGTGGCATCTCTCATTCCTGAAGTGAAAACATATCATATCA…
Contig27363 18 reads, 135 bases	p2	(GT)6	12	45	56	TATGTGTAGGGGCCCCTTAACACGCAGAAATTCCAAGAAACTCAGTGTGTGTGTGTACACCTGTAACCAACTATCACAAAGTGACCAGCTACCACACCGGTAACCAGCTACCACACCGGTAACCAGCCACCACAC
Contig27718 54 reads, 457 bases	p2	(AC)6	12	306	317	TCGGTCTCGGCATTCCTGCTGAACCGCTCTTCCGATCTCACAGAAAACTCTTTGATTTTATCTACGCCTCGTACTTCTTCTGGCAACAGAGGAAGCTTTGTGACATGAAAATCTTCATATAAATCAGTTATCTGATCCAAATATTTTGCTTGAATTTTCTGCCTTGCCTCACACAAAGAACAAGATTTTTCTCCCTTCTTTGAAATATTAAGTTGATTCACTATGATATTATGGGTATCAATGCCAAACTGTGTTAATTCCTGCACCAGCCGCTCTGTCTCATACAGTGATAGAAATTCTGCTATACACACACACACAAATGTGGTCTGATCAGCATTTTTAAACTGTGTGTTGACTTGTCTTATAGTAGCTAACATTTCTTCAAATTTATTTGACATT…
Contig27968 28 reads, 192 bases	p2	(GT)7	14	78	91	CCAGCAATAAGTTTATGTACACACAGAGACGGGGTCTTTCATAAAGTACATGACGCTCTAGGGTTCTCAGTTTGTGCGTGTGTGTGTGTGTGGCATGTGTGTGGGGATCATGTGACATAATAAAACCATATACCAGTATGGATTTGTAAATAATGAGTGTAAAAGGTAAAACTGATAGTGATATTGAGCATC
Contig28044 23 reads, 309 bases	p2	(GT)8	16	9	24	CAGGCACAGTGTGTGTGTGTGTGTTAAGTTGGCTTCAGTTTGCACGGTTATATGTGACAAACTGGTTTACGAAGAATCGTCCCCCTCAATATCCTGTCATATCCGTGCAGGATTGAGGGAGGGTGCCGGATACAAAATACTTGAGACTGCGATTGTTCCAAATCTTGATCTTGTGTGTGTCGACAATTTGGCCTGGACAGGACTGCAGTCAGGAGATCAGGTTAACTCGCTGTACTGTCGGGTGCACCAGGAACCAGATCAGAATCTGGTTGGTAATGAATACGTCGGCCCTTCCAAACTAAGGATGAA
Contig28184 20 reads, 141 bases	p2	(CA)6	12	63	74	TTTTTCTTTAGAGTCATCAGATGAACGCGGATTTTATTGGATGATACCTAAGCACAGCCATGCACACACACACAAGGATGATTAAAAGTAGAAATGGTAAAGCTTAGCTTTCGTTTTTTTTCTGAATTAAATGGCTAAATA
Contig28202 63 reads, 443 bases	p2	(AT)7	14	257	270	TACACGACGCTCTTCCGATCTCACAATTTATGGTTCAGAATGCATCATTTGGAAGGGCTCAGTGTTGCTGTCAGTTCATGAAATACTCTGAAGACTGTCACTGTGTGCACACCTGGATCTGTTGTGTGTAGTGACATGCTATCTTATCAACAGGAAGACAGCAGTCCACTTTTTAGTTTTAAACACATCATTTTCAGTCCTGTCACAAATAACAGGTGAGGACTATGAATAGCACTGGAATCTTGCCACCCACTCAATATATATATATATAAGAGGACATTGTGGTAAAATCAGGCCTCTCCAATTATATAAAATACAAATATTTTTTTTAAAACCCAACTTGTTCATAATAAAGCAACTTAATATCAAAAAATGTATTTCCAACTTAGAAAAGTCAAA…
Contig28285 100 reads, 371 bases	p2	(CA)7	14	279	292	CCGATCTGCGGAAAGGAAAATAACCATAGATTGATTGACTCCGTAATGTAGAATGATTTTATACGTAAACAATGGCAAGCAAATTATTTGCAGCAATACTAACGCAATGAATGTTTCTCAATACATGTGATTCTACAAATAAATGTGAGTAAATCATTTGATCAAGTGTGATACACACTAATATGAGACAATTTTGACAAYGCCATYAGCAGGATATCTTTTTACATTTTTTTTTAGRCCTTGAACCACATTCTCTCCTAAGCATTGACACCCCCTCCCACACACACACACACCCACACACAGCAGGGAACAGTTGAGACTTATAATGTTTATCTTAAAATAGGTAACGGCATTTGAACTCGAATATTTCT
Contig28570 14 reads, 153 bases	p2	(AT)6	12	83	94	TGTTGACTGACTGCTGACAACATCTACCGTTTGCGTCTCACAAATTGTGGGTGAGACAGCAATCAGGCTTTTAGAGTTATAAATATATATATATGTATGTTAGAGAAATAAATATATATCCATGTATATGTTATTAAAACAGGGTATGTATAT
Contig28632 46 reads, 445 bases	p2	(TA)6	12	389	400	TACACGACGCTCTTCCGATCTCAGAGRTCTATCAAAATGGCAATCAGTGTTGGGAAAAAGTTATCTTAACATAAGGGTGTGGGGTGACAGGATTAATACAATAAATGATGTATCTAATGAAAACATGGGAGACTACCTATAGTTTGTAACACTCTTGGCTTAAATATAAACCGTAAGTTATTTCAACTATGAAAATAAAGCTCAAGAAAAGACAAAAATAAATAAAAAAATAGATGGAATAAAATGTCATCAACATGAGGGTGAGCAGCCAAGCTCATAGTGCCTGTGCCATTAGCCTTAAGTGGTGTAATTGGTCAATAGAAATCTTACTTTATTATATTTTGACAAAATGACCCTTTTGCCTACGAAATATAGAAGTGTTCACATMTATATATATAT…
Contig2865 1623 reads, 707 bases	p2	(GT)6	12	17	28	TTTTTTTTTTTTTTTTGTGTGTGTGTGTTCTAAAAGGCTGATTTCGGGGATTTTCTGGATATTCGCTAAATGTTAATACTCTTGAAAATCGCTTGATTTTATACATTGAAAATTACAATTTTGTCTTGCCTGGGTTCCTTTTATCCGAGTCTTACCCCCACTCAATAAAACAAATTTATCAACACATTTATCAACACATTATCAAGAAATGAATCAACCGTGGTGCTGGAAAGGCCTTTTGATTTTATGCCAAAGCTTTTTCGCCCCGTTTTTTATTTTTTTCCAAGTTTTGTGAAACCAGTTTCTTTTAGACAAGTCTTTAGTGCTCCCATCTCGCTCCAGAAGCGACATCTCTTCATCTGCATTTAAATCTTTCTGTGCCACTTTCAAGCCGTCATT…
Contig2885 2387 reads, 517 bases	p2	(GT)6	12	27	38	AAAAAATAGGGATAACAGGGTAATGGGTGTGTGTGTGTATCCTGTTTACGGCTCTGCTTGTTTGGTTGATGTCTACGCAGATCAAACGGGTTTTTCGGGTATTTACATCCAGCCTCGACTAGTGGGTTGTCACGTCAACACTACTCGCACGGTTGGCGTATTCACCGTGTCTGACCCTCTTCTACAGACACGACATTGCTTTGGTGTGGTTCATTCCACAGTCTCACACGTGACCAGTGCCAAGAAAAAACACGTTTCTCTTTACTGGACAGCGCCAGTCCTTGCTTCCGGTCATGTTGTCATCAGAGCCACGATTGTCAAGGACAGACATACCTTCTGGGTGGACGTTCAGTCGCCCCCGTTGATTGACCTCCAGAACAAGGACACCCCCACTTGTGT…
Contig28869 23 reads, 148 bases	p2	(GT)6	12	9	20	CCGATCTCGTGTGTGTGTGTTGGTCTAACAATAACTTCCAATCTTAGACAAAGCATTCATAACAGGCAAAACCTCAGAATTTGAAACAATAAAAACCTTAAATCCCTAGAAATCACAGGGGAAAAAATAGAAACAATAAATATGAAAT
Contig28983 21 reads, 154 bases	p2	(GT)6	12	48	59	GGGTAWTCAATGTCTTTTTTAAGCTAATACTCTTACTTATTTTCCCAGTGTGTGTGTGTTACCCTACCAGAAGCATTGTTTTTTCCAACCTTCTGCAAGTGTAGCTTTAATGCCATTTAGTTGAATCTATTTACAYAGATCGGAAGAGCGTCGT
Contig2925 13161 reads, 563 bases	p2	(CA)6	12	295	306	CTCAAAAAAAAAAAAAAAAATAGGGATAACAGGGTAATATCAATCTTTGACAGTAGATTACAAGCTTACAATGACTTCTCAGCGTATCCTAGTACTTGTAGCCATTTCTTGCCTTGTGATGCTGGCACTTGGCGCCCCATCAGAATGGGAAACAGTGGACGTGTGCGATGAGATCTGCTTCAAACACCCAACTTACACTTGCAAAGTGGACTGCTCCGAGCCTAACGGAAGAAACTGCCTGAATCGCTTCTACGACCTTGACGGTAACGTTGCCTACGACTGCTTCGATTAAGCCACACACACACAAACACAATCCAGAGAGGAGACGACTTCACATCAACACATTCTATTAATAGAAAAATCGTTCTTGATGCTCTTGTAACAAAATAAATAAATATA…
Contig29369 75 reads, 364 bases	p2	(TC)5gcgcgcg(CT)6	29	253	281	GCCACCGTCGGTGTCGCTGGTGCCGGTGCAGGTATCGGAACAGTGTTCGGTTCGCTGGTAGTTGCCTATGCCCGTAACCCAAGTTTGAAACAACAGCTCTTCTCCTATGCTATCTTGGGCTTCGCCTTGTCCGAAGCTATGGGTCTCTTCTGTCTGATGATGGCTTTCATGTTACTGTTCGCCTTCTAGACGACTCTTGATTCAATTATCTATTTCCCGTACATACAAGAACATTTAGGCGAACTTTGTCATTCTCTCTCTCGCGCGCGCTCTCTCTCTCTCCACCCATCCTGATTCCTTTCTATTCATTCAACAGTAGCCTATTGATCTTGTTAGTCCTAGACTTATACTGTCACCAGAACCG
Contig30041 14 reads, 141 bases	p2	(AT)6	12	105	116	CGCTCTTCCGATCGCGGCACCTCTGAAGTGAATAGAACTGTTGCCCATCGTCTAACATCAAATAAGACTTCACTTTCTTTTTTGGGATAAACTCATCTTGTTTGATATATATATATACTGACATCCTACCTCAATCTAAAC
Contig30048 54 reads, 558 bases	p2	(CA)6	12	223	234	AAAGCCATTGTGAGACTATAGCAGTGCACCAATTAAGTACCGTTCTTAGTGCAGTTCAGCAAGTGTTTCAGTTAACAGAAACTTTTTTTTTAACAGCAGCAGCTTATAAATAATAATTTTTAACACATCCCTCATTCAAATAGAACACATTTGGTACCGGATGTGGAAGAGAATTTGATTTGTTCACAATAACTAAAACATGGATTAAATTCCAATGTTTAGCACACACACACAACATTCATGCATCATTGTCTGCTACACCATTTTCATCTTTTTTGCCGGTGATCCAGATTTGAGCCAGTTCATCATGAGGTTGCTGCTTGGATTAGATTTTGGTTTCCCAAGTTCAACAGGAGTTACACAATCAGGAGCATGGTACCTGGAGCTATTGACAGCCTT…
Contig30351 19 reads, 214 bases	p2	(AG)7	14	93	106	ACGGGAGTTCTGGGCCAAGTACCAGGAAAAGGTGGTCGACGCGTCGTTCCGAGAAATGAATGTGACAAGGAGAGGGAAGAAACAACGATGATAGAGAGAGAGAGAGATGTCCATGGACTTGTCTGGACACCATATGTCCATGAAATTAGCTGGACACCAGAAGTCCATGGATTGGTCTTGACAYYAGATGTCCATGGAGTGGTCTTGACGCCAG
Contig30448 41 reads, 214 bases	p2	(AT)6	12	28	39	TGAGAAATAAAAAGAAAACTAGAACGAATATATATATATGTATAGATTCAAATAGATAAACCGAAGACCGAGACGATGGCGTATAGATGTTTGTTTTCCCAACGAACGGTGCAGCTGCCGTCAGTTGTATTGTCCCAGTAGCACGAGCTGGCCGTGTGCAGACCAGCGCCGTTCTTCTGCATGATCACCGCTTGTACAATGTATTTGAATGGCT
Contig30667 60 reads, 309 bases	p2	(TC)6	12	298	309	CTGGTATTCCAACTCGCAGGTGTTCCGTTGGTTCTCGCGAATCATGCTCGTCGCGTTCACCGCATCGGTCTACTTACCGCTGCGCGGTGTCGATCTGTCCTACACGCCGTACACAATCGTTCACCACCAACTTGATCACAAGTTCGGCGACTGGATCGAGGAGATGCGCTACCCGGTGGATCAAGAGCGCGTCGAAGAGTACAAGAAAACCCATGGACTCAAATAGATTTAGTTTTATACTTCAAATCTTCCTCCCTAAAGTAGACCATGCAGTAAATTCCCGAGCAACACTTCTCTTCTCTCTCTCTC
Contig30687 40 reads, 398 bases	p2	(AT)6a(GT)5	23	56	78	TGCCGTCCTTAATATGCCGTCCTCCTAAACGAATGCATTTTTTGCCTGTGCCACCATATATATATATAGTGTGTGTGTACAATATATGTACATCACATAATAATTATATTGCTTTAACCTTTCAGTTTTTAACAATTGAGATGAAGAGCCGCTCCATCAACATTGTGCAATGCATTGAGTCGCTCCATCAACATTGTGCAATGCATTGAGTCGCTCCATCAACATTGTGCAATGCATTGTTGTATACATTAGCTTTAGGAGGTTGTTGTTATAAGATTTTTCTTCAATTATTAGACAGGGTTGTTTCAGAGTTCGCTGGGAAGATGCTTTTTGTAAGAATTTGATTTTTCTAGTGGAATTCTGTGTAAGAGATTGTTAGGCAAAGGTTGTTGTGTAAG
Contig30938 80 reads, 483 bases	p2	(CA)6	12	202	213	TAAGACTTGTATAAAGTAGATGTTTCATGCATTAATGGAATATTCTTTTCAAATGGGAAAACAGCTGCCTAGTAACTTAATATTGTTTTGCAGCGAGGGCTCACACCCTCAGCCTCCTGTTGGGAAAACTGCAAACATTTCCAATGCATTAGATAAAAAAAAAAAGAAATAGCCATCAACAGGGGAGGTTACTCAAATAATCACACACACACATTTCTGAATAGTTATGAAATTAATGTCAAGACAAATCACTTCAACTAACAACTCAAGAATGTGATTGTCTCCCTTGGTACTGACATAAGRCAAATAAAAAAGAAAGATAACTAAGAGCTATTGTATTATTACTTCACATTATTCAGATTTGTAGCAACAACCTTGTGACACACTCACACACTGGAA…
Contig31105 23 reads, 274 bases	p2	(TG)6	12	178	189	TTTGCAAACAAGGTAACTTATTTTAAATCCCACTTTCACACATAGGTAAAACAATAAACAGCATTAACATCGTTACATTTACATTTCTAGGCTATTTCTCATCGTGTTGACATTCATGTCACAAGAAAATTCAAGAAACATATCTAGTACAGGAAACATTTTATTTAAATAAATGTTTGTGTGTGTGTGTCCCATAACCTCGTGGTCGTAGGGGGCTCTAATGTTTCCATTCGAACTTTCTCGGGGCTTGGTAGACCTTGAGAAAGTTCTAATG
Contig31338 67 reads, 645 bases	p2	(CA)7	14	321	334	CCTGCTGAACCGCTCTTCCGMTCAAAATTTTTAGTAAGTTCTTAATTAAGTTGTGGGTGTTTTGAGGTTGTGGGTTAAAAAGAAAATTGTTTGTGTGAAGAAACAGGATAACTCTTTCTCTATGCATACTGCGACTACACATCAAAATGAAAGGTTTTATTCTACTCATTACAAACAACCCTGGCAAATGCCTTTTGTGGAAGTAAAACAAATTAGGTTCTTCAAATGCCTAACCACCAAACTATTCATCCATGTCCTTTATAACAAGGATTTCATCTATTATCTAGTACTACTAGCATGTAACATTCTTAAGAGAAATCCACACACACACACATAGAAATAAAAAGCATTCCATACATTTTGTATTATTGTTTTGTTGTAAACTGTCATAAAAACATA…
Contig31474 17 reads, 163 bases	p2	(CA)10	20	24	43	TTTTAATCTCAACGTCTATCCACCACACACACACACACACACACGCACACGTCTATCCTCCAAGCTCATTGTCAGAAACATTTTCTCATCAATGACACTTGTTCAAGTTACATTTCGTCTCTTCTTATTGATCTGCTGTGTTGGAACACTTATGTCATTTCGT
Contig31499 24 reads, 254 bases	p2	(GA)8	16	94	109	TACACTCTTTCCCTACACGACGCTCTTCCGATCTCGGGAGGACAAAAATTGCATTGCACAATCACATGACCAATAGTAGACATTGCAAATAGGGAGAGAGAGAGAGAGATGTTCAATTGATATATATAATTTGAATATCATTCATTCAAGCAAGCTATCATTTACTTTTCCCATCACACACCATGTTAAAAGTTTGGGAAGGCATGACAGCAATTAGGAAAATATTGGGGAAAAAAAAACAGATCGGAAGAGCG
Contig31646 33 reads, 405 bases	p2	(TC)8taacttttc(GT)6	37	41	77	ATCATCGAACGCTTCTCACTCTCTGCGTCTTACTTTCGTTTCTCTCTCTCTCTCTCTAACTTTTCGTGTGTGTGTGTTTCGTGCCATTTGTCGTCTTCGTTGTTCACATATGCATATCTTCTCGCTTCTTCACTCATGATGTTCCATCGGAAAGCAACACCCAATGTCGAGTTCATGGTTTTCGTTCCATCGCCTGAGCAAGCAACGCTCTACTTCAATGTTTTCTCTCTCTTCTTCCTCTTCTCGTTGTTGTCCGGCAAAGCCAGTGGTCTATTCTATCAGTGATCAGTTTTCGTTTGCTTATGTGGTCAGTTGGTTCTGTCTATCAGTTAGTGTCAACGTGTCACAGTCGATGTCAGTGCTCTATTCCATTATGTCTGCTATATCTCTATCGGAACA…
Contig32191 40 reads, 385 bases	p2	(CT)7	14	6	19	CCCCCCTCTCTCTCTCTCTCCAAATTTGTCTTTAAGGTTTAAGATAAGAAAATATAAACTTTCCACTGAGTATCTGTGATGATAAAGAATGAAACAGGCACTTGAACAATCAACACGATTGTCTTGATTGGGTGTACATTGTCCTTCATCATGGATGGATTGATTATAAACCCTGGTGTCATATTATATATAGTTATTTTCATGTCATATTTATGTTCTTATACCATGTATAACAGGAGGATTTTTTGTTTAAACTGCATACAATTCATCTGTTTATGTAATCAGTTTTGTTTTTTAGCCTGCTTTAAATTTCTACTTTTGACATTTTGTAAATGGTAAACTCTCATTGCTCGAGCACAGCGCCGGAASAGCGGTTCAGCAGGAA
Contig32197 22 reads, 201 bases	p2	(TC)9	18	163	180	CCCTGTTATCCCTATTTTTTTTTTTCTAAGCTCACAACAAATTTTGATTATGAAGCATTAAGTTATGAAACTGCTCATATATAATAGTGGATCAACTCTAACTTAGCACTCTCTTACTCTCTCCTTCTCTCTTCTTCCATCTTTCTGACTCTTCTCTCTCTTTCTCTCTCTCTCTCTCTCCCTCTTTCTCGTTCGAACATC
Contig32316 33 reads, 289 bases	p2	(TG)6	12	101	112	CACGGGGAAAAAATAAAATCATTAAGATCATGGGATTCCATTGTAAGAAAAATCACAGTACATGTGAGAATCTGTCTAGATAAAATTGTTTGGGTCGAGTTGTGTGTGTGTGGGTGGGAGGTGGTGTTGTTTGATAAGTATTGGTGTTAAGAGAGTAAACCACTCAAATGAAGAACTCATTTCCCAGCACTGAATGGTTGACAATCTTAGCCCCCATGTCAGATGTTCTTTTATACAAGTCAAATAATTCCAAGATATTGCAGTTAAAATTTCAATTCCCATAAATTTC
Contig32353 10 reads, 129 bases	p2	(AC)8	16	16	31	AAAACATTTATGTATACACACACACACACACAAATAGCTGAGGCTAAAATGACCTCACATCGCAATCGTCCTCTAAATCTGTTTCAACACCACACCAACTCTCGCACAACTYGTATTTTAAGCCGTTAA
Contig32451 17 reads, 176 bases	p2	(AG)7	14	34	47	TCTGTCCGTGAAAATTCTCGATTCGTGTTTAAAAGAGAGAGAGAGAGTACAAATAACACCACTGACAAATGCACATTGAACTAAGAAAGAAGAGCACGACAAAGAGAGAAAAGAAGAAACAAAGATGATAGTGATGACTTCCTACAGAGCATCTGTAAAGAATATAGGCGAGTTGG
Contig32490 30 reads, 181 bases	p2	(CA)6	12	49	60	GGATAACAGGGTAATACTGCTTCTTCTTTTTCCTTAGCAGCCCTCACCCACACACACACACCTCATCATGTCTGGCCCCAGCGACGACGAGATCAAGGAGGTGTTTGACATCTTTGACAAGGACAAGGACGGCAAGATCAGCGGCGAGGACGTCGGCACCTGCATCCGTGCTCTGGGCCGC
Contig32546 135 reads, 837 bases	p2	(AC)7	14	90	103	TTAGAATTTCCACCAAATTTAAAATAATACATTCTCTTAAAAAAGATTTGAAGATAAGTTGATGCAGAGTCGTGTCACCTAGTGCGGTAACACACACACACACATGACTTAGCCCATACACCTCTTTCGAGTCTGCCAGTACCAAATAACAGGAACATACTGAACACACGTATCTTTTTTGTTGGTGTCACCCCTTGTAATGGTGCCTTCCGGTGAAGTCCGCACCCCCTCCCCCGTGACCCCTCTGAGTTGATGTTACATTGACACAGACGCTAGCAGAACATCGAATCCTAAGTCTGGACTTTGGCCCCAATTGTCGCATTAACTATTTACTTGAAATGAGATGATAATCGACAGTCAAGACGATGTCAAGTTAAAAGAACTATCTTTTTGATATGT…
Contig32585 29 reads, 373 bases	p2	(GT)8gcgtgcgtgcgtatgtgtgtatgtgtgtgagtatgta(TG)5	63	216	278	ATTTCATACTAAGTTCAACCTTGAATATGCTTCGTCTGCTGTGATCTATTTTTAGAGAAATACAACCATATATTTACAACATATCTGCACCTGTCTGCAATTTACGTGCAATGAACACATACACAAATTGCGTTAAAAAAAGAAATTCAAATGCAGCAGATTTATAAGCAGAATTAATTATTTAAATCATTAACATACATGTCTTTGTATGCAAAGTGTGTGTGTGTGTGTGCGTGCGTGCGTATGTGTGTATGTGTGTGAGTATGTATGTGTGTGTGCACATGTTAAAATAAAAACTTTGCTGTTTGATGGTTTTGAACCGGAATGTCTGGAAACAACAAAATCACATAGCATTTTCAAAAGGTTATTAATT
Contig32601 23 reads, 224 bases	p2	(CA)8	16	113	128	TAGGGATAACAGKKTWATAGCAAAAGAGATCAGCAGGGAATATTTTCTTTACTTGATTTTATTAATATTTCCTTTATCACCACACATGTCCATACACACACTCATACATATTCACACACACACACACACTCATGTATATCCACACACACTCTTGTGTATCCAGCACACTGTGAGTGTAATTCCCCAGCCCCCATGCTGCATTCAGCAATTAACTTGAGATCGGA
Contig32658 50 reads, 422 bases	p2	(TC)7	14	318	331	GGAAGAACCGCCAACGGTTCGCTTTCAAACACGAGTGAACTTAGCCGGTGTSGCAGCCAATGGTTCCATCGACCCGAAATCCGTGCCCTCGCTGCGCAGCTGGACTCGCGACATGACTATCCATCAAATATTGAATGACATTCGCGCGAGCATGTCAGCGAAAGAGAATGCCAAACTATCTCAACCGCCCGAAGGCGCACTTTATCCATCTCAGTGATCATTCGCCTAGCCAAACGCGCCAATGGATTCGAACGTTTTCACTCGCTTCTTCGTTCACACGCCAGCCTACAACCATGAAAAACACTTTCTCCTTTCTATCTCTCTCTCTCTCTTTTGTGATACCTTTTTTCGCTTCTGCACACTAACTTTGATCCTCTGTGTTTGATTCGATCGCATCGG…
Contig32731 45 reads, 311 bases	p2	(TG)9	18	77	94	GAACTTGCCTTGTCTTATTTGCGTACTTCAGGTTACGTTCTCCTTCGAATGGGAGAAGGGAAGGAAAAAAAAAGGTTGTGTGTGTGTGTGTGTGGGGGGGTGTTAGTATGGCAAGTGCATCTCAGCCAGGCTTGACGTCATCATATAGACACAACATCCTCCCACGATGAACAGCATGCTAGACGTGATTAATGATTAGCTACGATAATAGGTAACACCAATTACAGGTTTGCGTGATGCCCTTGCTTCTGGGACTTCCGATAATAGGTAACACCAATTACAGGTTTCAACAGATCGGAAGAGCGTCGTGT
Contig32815 44 reads, 418 bases	p2	(AG)6	12	269	280	AGGCCCCACACGTTGGCCCATCGGTGCCTTCATTAAATAGCTTATGATCCAAGCAATGATGTCGATACTAAAGAAGTCCCGTGGTTTGTTCAACAGAAACTATTCCCTCTGTTCATGGGCTGAGCAAATCTGTACACACATCTTTCTTTATATTAAAGAAGGAAAAGAAATTGGTGGTTCCTTGACACTGGAGATATTAACTTGATTTTCTTTTTATACTATGCCTTTTGTTTTAAGAAGAGAAAAATGAAAGGTGTGTGTATGTTGCAGAGAGAGAGAGAATCAAATGGGGTCAAAGTTCAACTATGTTGACCCCAAGAACAAGACAGTTTGTAAATAAGCTAAAGAACATTTGAATGAACTCAACTGAAGCCATTCTATCTACACAAAACACTGGAT…
Contig32883 33 reads, 179 bases	p2	(GA)6	12	141	152	CCAACAAGCGAGTGTGCGAGGATGTGGCCATCATCCCGAGCAAGAAGCTCCGCAACAAGATTGCCGGATTCATTACTCACTTGATGAAGCGTATTCAAATCGCTCCAGTGAGAGGTATTTCGATCAAGTTGCAAGAAGAGGAGAGAGAGAGACGTGACAACTACGTCCCAGAGATCTCG
Contig32895 64 reads, 480 bases	p2	(CT)7	14	280	293	CTTTCTGTTCGTTTTCGATCGCCATATCACTCAAGTATCTTTGAAACGCAAGTTCAAGCATGCCAGCCAACTCTTCGAAACGCAAGCGAGCTAATGAGGTACACAGCAGCAAGATCACGCAGCGTGGTAATGTACCAAAAACAAACAAACCAGCGGAAGCGAAAGCACCTGTTGGCCCGTGGCTGTTGGCATTGTTTGTTTTCGTTGTTGTCGGCTCGGCCGTCTTCCAAATCATCCAAAGCATTCGAATGGCTTGAAGTTGAACGTGTCTTACCAGCACTCTCTCTCTCTCTTGTTTTCTTTTAAACGCTCATCTTGTTTCCTTTTGCCTGCCGAAGAATGATTGTAACGAACACTGTTCACATTAAACGATACGAACAGCCGGCGATCTCCATCACG…
Contig32921 32 reads, 181 bases	p2	(AT)8	16	6	21	ATAGAATATATATATATATATGTATAAAATCTTTGGTAGCAACAAGGATTGGCAATGCGGAAATAAGTGAGCAAATGACCCAGAGGACACAAGTTTTGGCTCCCTCATTTTGAACTCAACACTAGATGCTATACTGAACACTAGATGCTAAACTGAACACTAGATGCTAAACTGAACACTA
Contig32928 11 reads, 156 bases	p2	(AC)6atccataatgtgacaagacagttacaccgatacgacacccagcacacacttacacacacaagcaa(AC)6	89	29	117	CCCAGCACACACTTACACACACAAGCAAACACACACACACATCCATAATGTGACAAGACAGTTACACCGATACGACACCCAGCACACACTTACACACACAAGCAAACACACACACACATCCATAATGTGACAAGACAGTTACAGATCGGAAGAGCG
Contig32930 54 reads, 496 bases	p2	(GT)7	14	376	389	CGCTGTTGTCATTGAACAAGAATTCCTCACAGATGCCCTGCCTGTCAACTTAATTGGTATGAATTGTGAGCTGATGAAGAAGTACATTGAATTTGTTGCAGACAGACTTCTGGTTGAGCTGGGATGTGAAAAGATTTACAATTCAGAAAATCCATTTGACTTCATGGAACACATATCTTTAGAGGGGAAAACGAATTTCTTTGAGAAGAAAGTTGGGGAATATCAGAAAATGGGTGTCATGAACAAATCACCAACCAGCCATCAATTCTCCACGGATGAGGACTTTTAATTTGTGTTCATTTTCCCAACCTATTGATCTCAGGTCATTCATCCCACAACTGCCATTTGTTTCAGTGTGTGCTTGTGATAGTAAAGGTGTGTGTGTGTGTGACCAGATTT…
Contig33049 22 reads, 258 bases	p2	(AG)6	12	242	253	ATTAAATACAACATCAATGGAGATCCCAGACAGATTATACCAAAGGGTTTGGAGGCAAATTTGGTGTGCAATCAGATAGACAAGATAAGTCTGCAGGTTCATTTGAAGACATGGGGGGTGTGAAGTCAGGCTATCAGAGACCYCAGGCTGACAAAAGCAGCGAAGGAGCTAAGAATTTAAAAGCAAGATTTGAACAATTTGCTAAATCTGGAGACGAAGAGGCTAAGAAGAGAACTCAGGAAGAGAGAGAGAGAAGAG
Contig33060 33 reads, 360 bases	p2	(AG)8aa(AG)5	28	272	299	AAACAGTTTAGTGATAGGAGAATGGTGATTTTTGTGCAGTTTTTGTTACCAATTATAATTGTTACACTTGTAAAGGAATACAATATGTTTGAAAATGTGTAAAAAATATTTTTCTCCATAAACTCGTGCAGTTTTTTTTTTATTGAGAGCTGATCCAAGGTGTCACTTAAATCAAAAGCATGTGCCATAGCGAACACAGAACTATAATATTCGCTCTACTCCTCTTACCTGAAGTAATATACCAATTTTTAATAAAGAGGGAAAGATAAATAGAGAGAGAGAGAGAGAAAGAGAGAGAGATCTTGTTAAATATATATTTTGATACATATTGTTTACTCACATATCCTCAACAAGGAAATG
Contig33110 72 reads, 769 bases	p2	(TA)6	12	649	660	CTCGTAGCAGATGTCTCAACAAAAATAAAACTAACGTTTGAACTAAACTTGTCTAACTTCTGCTATTTMACTTCTATGTTCAACCGCTTTTTACACCATTTTTACAATTTGGATGAGCTGTAATTTGTTTCAACTTCCATTTGAATTGTTTGTGTTAAGTTTTGTCATTATTTTCATTGTGCCTGTACTCCACATCATGTCTCCGTATTTAAAACTTGCTACTGTCAAATGGCAATGGTCAATAATTTGACCGGTCTCACATTTTTTTATATTATAGCTCAATGTTTGGCCCTCTAACAGATGTCCTCTATAGAATAGCATGACTGCACCTCACCAGTATTTGTATTTTGTATAATTTTATTGATTAAGTACCCACTCAAGCTGAGCTCAACGCAATAT…
Contig3312 2738 reads, 337 bases	p2	(GA)9	18	314	331	TCTACACTCTTTCCCTACACGACGCTCTTCCGATCAGAACCGCTTGCATCTTCACGTCAACGCTGTGGGGTCGTGTAACTGGAGGCGAAACTCAAGTCCACGCTGTGGGCTAGTGTATTACCCAGTCCCAACTGTCAAGTTTATATACCCATATAACGGTTTTCAAAAAATTATTCTTCCATCATCAAAGTTTGTATAAAAGTCGCTTAAACAATAGTTATTAATGTGATCACAAGGAATCCAATCCATGCGACGCAGCGACACATGTGGTGGAGTGGATCAGTGGACACGATCCATGGATAACTTGTCTGGTGAGAGAGAGAGAGAGAGATTACCC
Contig33164 62 reads, 575 bases	p2	(GT)6	12	564	575	TTTCCCCTCTATGAAAAACCATTACGTATTCAATTTGCTAAAATGGATAGTGATATAATTGCTAAGCGAAAGGATACATTTGTTGAACGACCAAAACGTCGTAGTGATTCTGATGCACCATCGATATCGAAGAAAGAAAAACGTCGTCAACAAATAGCTGCTAAACAAGAACAACAACGTCTAATGAAAGCTCAAATAGCAGCACAATTTCCTGGTTTACCTGCAGGCATGCCACCGATGATGCCTGGTATGCCACCAATGATGATGCCACCACCACCAATGGCCAATCGTCCAGTTTTACATCCTCCAATATTTGGTGGAGAAATGCCGAATAATATTTTATTCGTTTCGAACATCCAAGATGCTAATGAAACGATGTTAACAACATTATTCAAAGCT…
Contig3338 2250 reads, 957 bases	p2	(TG)7c(GT)5c(TG)7	40	835	874	CTGGGGCGGCTATGTTTACACGGGCAACAACCCTCTGGCCAACTCCCCATTTACTGGAATGTTCTCCGTGTTTCTGAATCATTTCGGCTCAAACACGTCATCGTCTAGCAGTGAGATTGACCAGCTGCTGAACCACCCAAGCGTCATCTACAAAGAGGACCATTACTATCCGACCTTCCTGGACTACGAGGTTCACGCCAATGACCAAGAGTTCTACATTCAATACATTTTCAACAGCCTCATCCAAAGGTCAACCATCACAAACTCGACCACCTTGACCAGTTACGTGGACACTCTGCACGACGTCGCCCGAGATGGAATAAGTTGTATGGCCACTCTGATAGGAGGTAATATGATTTCCTCCCCTGTGGGTAGCACTCCCGTACATCCGGGACTTAG…
Contig33471 17 reads, 87 bases	p2	(TG)6	12	23	34	GGGTAATACTCCCGCCCTCACCTGTGTGTGTGTGTAACTGTCGCGTGACTGCGACACAAGCTGGGACATTCCATAAACGACGCGCCG
Contig3374 1259 reads, 1067 bases	p2	(TG)11	22	955	976	CCTATTTTTTTTTTTTTTTTCAAACATTATTTTGACATTTATTTTGTGCATTTAATGATTCAAACACAATATAGGGGGAGGGGGGTGATAACACCATAAATTGCTAAGGTCACTTTCCATCATTGCAAGATGACATTAAACTGGACAATTAGGGTTGAAGTAACAGATGGAATCGACTATAGACAATGCAAATACTCTTCCTCAGATGACAATGACATTTATGGCGCATGCTTTTGAGCGGAAAAACAACTGTAGCAGTTGTAGGCAGTGCAGGGATCATTCCAGTAAATTAAAGGTTGTAAAAACAGATCAAGCTTCATGTAATCCCTTGACTTTAACATCACATGATCGTCTGTGGCACTACAGAGCAGGAACCACAACTATTGGTTTTTTAAACGT…
Contig33753 126 reads, 539 bases	p2	(TG)6	12	225	236	TTTTAAGCAAGTAATGTGTACAATTTTTGTACTTAGTGTTACACTGTAGAAAACATTGCTGTGTATTCTTATTGCTTTTTTATAACTAAGTGCATCTTGATAATCAAAGTTTATTTATCAATATCATTATTTAGTCATATTTTAACCAGGTCGCTACTTTATCCGGTGACAGTGGCTTTGTTTATTTTTAAAAATATATTTTTGTTCTTGTTCTTTTGACTATTTGTGTGTGTGTGCCATTCAGTGTGTATTAAAGTGCTTTGATTCTAACCTGTCAGTTAAGACTAATTTTTTAAAAATTGTATCCAACTGCCAGATTCTCTGTAAAGAATAAAAGCATCACAAAATGCTTCCTTATATTTTAGCCTGCCCCCTTTCTAGATTGAATTATTAAAAAAA…
Contig34148 23 reads, 218 bases	p2	(GT)6	12	46	57	AAAAAACTAGACGTTAGGTATTTTAGACAATGATTGGGTTCGCGAGTGTGTGTGTGTCAGCGAGATAGGACAGATCTCTGTCTTAGACCTGAATGACCTATACCCGCGACATGACTGAACACTGTCCATACTATGACTGACCTCTGTCCGTTACATGACTGACCTCTGACGGTGACATGACTGACCTCTGACGGTGACATGACCGACTTCTACCCGTT
Contig34557 16 reads, 312 bases	p2	(TC)7	14	39	52	ATATTGTTCATTCCGTCAGAATAGACTTCTGTTTTTTTTCTCTCTCTCTCTCGTGGTATATTCTTACATCTTGATTGTGCAAGATTTCATTCTTAGATTATAAATATTCTCATTTGATCTGATCTTCATCATCTAATGGCACGAACAAAACAAACTGCACGAAAATCAACTGGTGGAAAAGCACCACGTAAACAATTGGCAACAAAGGCAGCACGAAAATCTGCACCCAGTACGGGAGGTATCAAAAAGCCCCATCGTTTTCGTCCGGGTACTGTTGCTTTACGTGAAATTCGTCGTTATCAAAAATCTACG
Contig34940 64 reads, 490 bases	p2	(TG)10	20	70	89	CAAGAATCAACTTAAAGGGCAAGTCTCCACTAGTTAGGAAATTAACGCGCACAGATCAGAAACATAATTTGTGTGTGTGTGTGTGTGTGGCTAAACTGTCATCGAGCACCACAAATTTTTATTGAGTCTGATTTATTGTTTTTTCTTGATAACAGCCTGTAATCTTTATTTCCTTAAGCCTTTGCACTAATTAATCTGTTAGCTTCTTATTTTTATCACCCATAAGGACTTGCAATTGTACGCAGTGGCGTAGCTAGGGTGGCGGTGGGGGCGGTCCGCCCCGGGCGTCACTCATTTAGGGGCGGCATTTGTGGGCATTTGAAAAGYACAAHCATTTCCGACAACCGCCCTTTTTCTTTTGAAGGGGGAAAACCAAGGTGGAAAAAAATCGTAATTTGA…
Contig3500 3400 reads, 1351 bases	p2	(TG)9	18	1269	1286	TGGCGGTTAACACAGTGACCCCAGCCCTACGCACCGTTTGCTACTACACTAATTGGGCACAATACAGAGATGGAAAGGGCAAGTTCCTCCCAGAGAATATTGACGCCCACCTGTGTACCCACATCCTCTACGCCTTCGCTAAACTAGAAGGCACTGAGATCAAACATTATGAATGGAATGACGACACAATGTACGCCAGAGTGATTGCCCTAAAAAACACAAACCCATCCTTGAAAATCCTTCTCTCGCTAGGGGGCGGTAGTGCTGGGTCGGCGCCATTTACTCACGTGGTACAAAACAGCGCAACTCGAAGTTCATTTATTTCGTCAGCCATTACGTACCTCAGACAGAAACACTTTGATGGCCTTGATATTGACTGGGAATACCCGGCTCAAAACG…
Contig35121 14 reads, 129 bases	p2	(AC)6	12	69	80	CACAAACACACGCCTTTCATCATGTCAGCAGCTCCCCTCCCTCCAAACACCACACAAACACAACATAAACACACACACACCTTTCATCATGTCAGCAACTCCCCTCCCCCAAACACACGCCGTTCATCC
Contig35127 21 reads, 259 bases	p2	(AG)8	16	68	83	AAAAAATAGGGATAACAGGGTAATTATGAAATGTAATAAACGCCCAGCTTTCATCTTGATGATGGGAAGAGAGAGAGAGAGAGGTCCCAGTGCCATCTGCCTTTTGTTATTTTACACACATGTCAAAAGAACTAAATATACATTTGTCTCAAAAAGTTCTCAATATATTTGGTCTCATATTTAAATACATACCACTTTTTACTAGTTTTAGTCGTCAAAAGCATGTTTTATGAATCTTGTAATTATGAATTCGTTGCGA
Contig35194 56 reads, 419 bases	p2	(TG)9	18	55	72	ATAAATATATAGTTTGTGTGTGCGTTCTTGTGTGTGCGCGCGCGTATGTGTGTTTGTGTGTGTGTGTGTGTGAAGGGTGAGGATGGGAGCTCTCCAGATGCGGTGTTTCTGCGATTCTTAGAGATATTAAAATGATAATTATATGAACCAAGCAAGAAAATGAATGTTTTCCCACTCTTCAAGGAAAATGCGTGTGGCATGGCGCCTATTAGAGGGCTTAGGGTGGCGATTGAGGGAGTGGGTGAGTGGCGGTGAAGTTGGGCTTGGGCTTTGAAAGAGTTGTTGCAATGGGTTGTTGCAATGTGTTGCTGTAATGGGTTGTTGCAATGGGATGTGTCAATAGGTTGTTGTAATGGGTTGTTGCAATGGGTTGTGATGTACGTGCGATACAGCCTTATG…
Contig35215 25 reads, 199 bases	p2	(CT)7ttctaag(TC)5	31	45	75	AATTGACTGGTGGCACTGSCTCCGTGACGTACTTTATGGACGGCCTCTCTCTCTCTCTTTCTAAGTCTCTCTCTCACCTTCTGTTCCTTATTCCTTCCCTTCTCTCAATCGTTGTTTCCTTTCTCCTTTGCCTCCAGTCAATTTCCCTCTCTCTTTAACTTTGACAGATCGGAAGAGCGTCGTGTAGGGAAAGAGTGTA
Contig35482 56 reads, 327 bases	p2	(AC)9	18	90	107	CTTTACACATAATGAAAAAAAATTAAAAGTTGGTTTTCACCAGTAGCTTAATTCAGATACATTTTACCCATTRCATAAATTGCAAAAATACACACACACACACACACAAGCGAATGATGTGTTTAGACACGTAAAATGAAAATGATGAGCGAGTGTAATAATGTGTTATTAGGCTACAACTAGCTGAACTAAGCCGTGTCAGTGACTTACATCTAGGTGAAGTAAACCGTAACTGTGGCTAAAATTTGTTTGTGACAGGAAGGGCAATGTGTCAACAGTTTCGAGCAGTCAGAGCAGGCGTACAACTCACCACAGGGCAGGAACAAG
Contig35483 30 reads, 272 bases	p2	(AC)8atcatg(AC)6attgtggcacacacattgttgcacacacatcatg(AC)5atcgtg(AC)6asatggtg(AC)5	114	138	251	TGTCAGGCCATACGTCAAACATTAAAGTCTGCACTCACATCTGTGCTTCTAGAAAAATTTTTGAGCCTCTAAAATCTCATGACTCACAAATTGTGACAAACACACATGTTGACACACATTGTGACAAACACATCATGACACACACACACACACATCATGACACACACACACATTGTGGCACACACATTGTTGCACACACATCATGACACACACACATCGTGACACACACACACASATGGTGACACACACACAAGGTGGCACACACATATTGT
Contig35551 78 reads, 522 bases	p2	(CT)8	16	48	63	AACCAGTTATAATAATCACGTAGCCAATTGTGTATGTTTGTATTTAGCTCTCTCTCTCTCTCTATGAAAAGAATTACTGTGCATTTTGACAGATTGTTGTGTGTATAAAAATCAAAGGTCATATACATCATTATTTCATCTTTAAATGCTGTATTATTCATAAAAATGTTTTTTTAAGGTCAATTTTTTTTTATTGATAGCTTTTGCGTCTATTCATTATTCAGCCATTGAATCATAAATGCTATGTCATATTTTGACTCACTGCCAATGTGTTACACAAACCAACTTCTGCCAATGTGTTACACAAACCAACGTCGGCTATGATCACGCCTGATGACAGGTGTGTCTTTTTGTTGGAGTGGCCTCTCCTTAATTTAAATGCTGCAATGTGTTCAGATG…
Contig35613 15 reads, 315 bases	p2	(TA)5tgcatctgatcaagtctgacaaaatttagctttgtaataatgaccaaaagaaataaatttgttaagaaactacaataaactaacaacacaagac(CAAA)6	128	53	180	CGATCTGGCAATGTTAGCAAAGTGAAACAGCAAAACATAAACAAATTATCTTTATATATATATGCATCTGATCAAGTCTGACAAAATTTAGCTTTGTAATAATGACCAAAAGAAATAAATTTGTTAAGAAACTACAATAAACTAACAACACAAGACCAAACAAACAAACAAACAAACAAACATCCCTATACAAAACATCATTTTACCATGGTCTAGAATAATTTAGGAACAGCATGCCATAAAGAAATGGAATTAAATGAAAGATTCTTTATGATAACGTTAGGATTACCAGATCGGAAGAGCGTCGTGTAGGGA
Contig35748 11 reads, 150 bases	p2	(AC)6	12	23	34	CTAAAAATAAACACACAAACAAACACACACACACTCACACACATTTATAGACACATACACCCAAACACTCAATTTCTCGCTCTCCTCTTTCTCCCACTTCTCTTTCTCTCTCTTTCTCTCTCTTTTCCCTCTCTCCCTGTTACATTCCCT
Contig35782 11 reads, 251 bases	p2	(CA)8ccattctattataacaaacactgaat(AC)6aaaattatattataaaaaacactgaat(AC)7gcgcgccattctataacaacaaacactgtat(AC)6aaacccttctattataactaacactgaat(AC)9cattctattataacaaacactgaat(AC)10	230	1	230	CACACACACACACACACCATTCTATTATAACAAACACTGAATACACACACACACAAAATTATATTATAAAAAACACTGAATACACACACACACACGCGCGCCATTCTATAACAACAAACACTGTATACACACACACACAAACCCTTCTATTATAACTAACACTGAATACACACACACACACACACCATTCTATTATAACAAACACTGAATACACACACACACACACACACAATATTATATTATATACAGTC
Contig35807 13 reads, 148 bases	p2	(TG)6	12	8	19	GTTCYCTTGTGTGTGTGTGTATGGGGCATTTGCTGCTTAACGTTTAATGCCCCAGAAGGTTTTCGCCAAACTTCCGCCTCAGTCCCGTAAGGATTTCCCGTTAATTGCGATCAACTGGTTATGAAATTTAAAAAAATTACGGAAAATG
Contig35966 28 reads, 279 bases	p2	(CA)6	12	65	76	CACAACAAAAGAGGTGGATTTTCATTAATTCCAAGAGTTCTCACAANNTGTCATANGNGACACNCACACACACACATCCTTAAGTTTGCATACTCTTGCCATCACATGCCACAATTTTCACCTTGTCCACTTTGGCGATCTCTTGGACTGGGGCCTCGCGGAATTCAACCTGGTTGAGCACGAATGTCCAAACATTGTCACAGAAACGATAGGTGTTGAGCTTGCCCTTGAATGAWATTTTAGCCTTTACTCTATTAGCTAGAACTCAGGTAATGACCA
Contig36071 84 reads, 538 bases	p2	(CT)7	14	91	104	TCTTCATGATCGTGTGAGGTATTGATCTTTTTACCGGTGCTATGTTTATGTGTTTAAGTATGATATCGTGGTAAGTAAGTTATGATTTGACTCTCTCTCTCTCTTTCACACAAACACATGCATATACAAAATGTTTTCGTGACGATTCATCTCACATCGTCTTAGTCCAAGTGTTTGTTGACTGCTGACTTTCTGCGACTCCTGTTCTTAACGCTGATCCCAAGACCCAAACAAACCGTCATCCAGATGTTCTCGCCCATGCGGCACTTAGTCAATAGCTTGAGAAAATGCATATTGCTGTTGGCACAAGCTCCAACAGTTCATGCTCATGTTTGGAAAAAACTGTTGACACATTTGGAGACAGAAGAAAAACTGCTGCAATTCTGCAGTGGCGAAGGA…
Contig36200 17 reads, 139 bases	p2	(GT)9	18	43	60	CGAATGACTGCGATGAAGAATATACACCGTAATTCGTGACTAGTGTGTGTGTGTGTGTGTGACTACGTTGTTACGCGTCTCTTCTTAGGCTGCTTGCCGGCGTTTTCGTCGGCCCATGAGTAACATTCGGCTGCGTACG
Contig36369 23 reads, 304 bases	p2	(AT)6t(TG)8	29	42	70	TTTTAAACTGTGTTAAAGTGTCTATTCATTTAATCCTATACATATATATATATTTGTGTGTGTGTGTGTGTATATACATACATAAATATATATCTATATGTTTGTGTCTATATTTTTGTACACATACATACATATTTCTCCTTGTCTTACAGAATATATTTTTCTCATTTCTTTAAAAACCAAAACAATAATTGTAAATGGCAATATTTACTAGTAGACAAGACAATCTGTATCGTTTCTTTAACGCGTTTTTTTATTGGGCACTCCATGCACAAGAAAAACTAGATGACTGCTTGAATTGCTG
Contig3639 74 reads, 169 bases	p2	(TG)6	12	92	103	CCCTGTTATCCCTATTTTTTTTTTTTTTTTTACTTTTCTTAAATGTTTAATTTTGTTAACCCGGCATACAAGTACAAGTCAATAGCATTAATGTGTGTGTGTGTTTAAACTTCACGGGATCTAGCAGGACGCCGCGGATCGGAAGAGCGTCGTGTAGGGAAAGAGTGTA
Contig3661 1488 reads, 516 bases	p2	(TC)6	12	421	432	AATAAATTGAAAATAAATTGGTTTACAAAAAGTAAGAAAAATGAAATATAAATTCTGATTWTAAATGCACGCAATTTCAAATTTTAATGTTCAAATTAGAACAACAGCTCCAGCACTCAAACACTAACAGAGTTAAGGTTATATGATTTATTTGCAGCCGGAACCAGCAGGATTATTGCTATTGCTACGTGGACAACATTCCAAGAGAGTAATAGCACAGCCCTTGTTTTTGCAGTCCGTATTCTTGGTCCCCAGAGGTGTCTTGCCATCTTTGCAGCACCCAAGTAATAAACATCTATTACGTACGATCCCGATAACAAAGGTGAGATTCACTGCTCTGGTATATTGACTACACGTTAAAACCATGAAACAGACGAGCAGTACACCTTTGCATGTGAA…
Contig36653 26 reads, 237 bases	p2	(TA)6	12	22	33	CTTTATTTATGCGTTTATATGTATATATATATATGTATGTAATAAGTTCCCATCTAAGACTTAGCAGAACGTTGTTCAATGCTGTCTTGTATAAAATAACACATAGTGTAGCTGTTCATCCTTTATGACTTCATAGTTTACAAATCCTTTATAGTTTATTTATTTGAGTAACGTCTAGCCAACGACAACCCCAGCCGCATCGAAAGAGTAAAAATAAAGCGTGCTATTTCTACCCTC
Contig3668 14 reads, 220 bases	p2	(AC)17(ACAT)25*	132	63	194	AGACCATAGAGTAGCAGYAGCAGCAGCAGCTAAGATTTCTAGCGGTCAGCGTGTACGCAAATACACACACACACACACACACACACACACACACACATACATACATACATACATACATACATACATACATACATACATACATACATACATACATACATACATACATACATACATACATACATACATACATACATACAYACAYACACAMATACATACATAC
Contig36704 41 reads, 282 bases	p2	(AT)7	14	119	132	CCTTAAGTCAACCCGTGACTCTGTATGCCAGCCAAATGTGCATGTTGCTCGGCCACCTTGCACCCGAGCTAGCAGAAAGTAATACAATTTTCAAGGCACAAAAGGTGAAATCATATCAATATATATATATATAGAGAGAAACTATAGATTATCTTCAGTTTCAGGTTAAAATGTATAACTCTTATTGCTAATATTATGAAATAGACCTGAGACAATATAACTTTTTATTAACAAAATATCACATCAAATAAGTCAATGTGCATTTTAAAAGTGAACTATTTA
Contig36838 25 reads, 182 bases	p2	(CA)7	14	76	89	CGATACACTATAGGCTAGGGATAACAGGGTAATGTCACTCCACACACACTCCCAACACCACACACAAACACACCCCACACACACACACACGACACACACAACTGTCGCTGTCTGTCTGTCTGGCTTTGTTTGTTGGTTGGTATGCTTGKATGTTGCTGTGTGGCCCGGGACAANAAACAAAC
Contig37121 101 reads, 514 bases	p2	(GA)10	20	52	71	TGGGATGAAGAATAAATAGAAAAGAATTTTTCATCTCCGGTGATTGATTCGGAGAGAGAGAGAGAGAGAGAAATGTCATTGCATACGACTAGTTGAATGAGATGTTCGATTGGACTAGGTTTCCTTCCATAGATGAGAATATTCGTGTTTAGATTAGCAGACATCCACCTTTACGTTTCTTCTTTCGAGCTAATGCTGCACGTGCGGCATGTTCGAATACTTCACGTACACCTTCCTTGGTCTTCGCTGAACATTCGAGATAACCAACAGCACCGATTTTCTCGGCCATATTTCTTCCTTCTTCACTTCGAACAGGTTCTTGTTTCATTTTCATTAATTCTTTCTTCGTTGCTTCATCATTACGTAAATCTTTTTTATTACCAACGAGAACAATCGGAA…
Contig37233 19 reads, 165 bases	p2	(GA)6	12	153	164	ACACGACGCTCTTCCGATCTTCCACACCCAAATAAAATAACTGTTGAAACAAATAAATAATCTTGGACGGCTCACGTGACTTTGTATAACTATTGTTTGATGTAATGTAGACAAAGCTTAGGAGAAAGAGAAAGAAACAAAAAATAAATAGGGAGAGAGAGAGAG
Contig37370 19 reads, 378 bases	p2	(GT)6	12	45	56	CGTATTGTTGCCTTTTGTCATATAAAATCTAAACAGCTTGTTTGGTGTGTGTGTGTCTAACATGTTGAAGTAATTGCTCTAATGTTAAGTAGACCATATTGAACAAAGTTGTTTTTTGTTGTTTTTTTTAAAATCAATTCCCAAGTTTTTGTTCACCACCACCACAAAATGAACCCATATATTATTATTATTGTACATACATTTCTAACTCATTGAAGTTGAAGGTAGAATAATTTACAGCTTCTTGTACTTTTGAATATTATCATCCTATAATTATCATTCTCGACCTTGTTATTACAAATATAAGTTGTTATTACCTCACCATACTCACATATTAATTTGTATTTAAATGGAAAGAACTATAACTATAAGCAACTG
Contig37453 28 reads, 389 bases	p2	(TG)6	12	213	224	TACTTGCTCCCCCTTTTTTTAAATATATTGTAGTACCTATAAATAAGATTAGGGTAGCCTATAATCCAGATCACTTGTAGTTGTAGCATGGTGTTTCCTTAATGTCATTGATCTCACCATGGTTGGGGTGTAAGATTTGTCAAGTATATTTGTGTACTAATCTTTACCTGTATGTTATACAACAGTTTGTGTATATGTATATTTATATTTCATGTGTGTGTGTGTATGTATACAGTGATTTTAATGTGTATAAATGTGCATAAAGCCCAAGAATCAAATGTTTGGTCACCAGGAATAATGTACAAATATTCTTTAATGTAATCTTCAACCTTATTTTAATTAGTGCATCTTTTTCCTTTAACTTTAATAAACCAAAACATTTCACSAAA
Contig37607 37 reads, 303 bases	p2	(TC)7	14	91	104	CATAAAGGAAATTTGAAAGTAGTMGCCCATGCTCTCACAAAGAAAACTGTGATTTGTTACTTTTTCTTGCGTCTAGACCTCTGGTACAAGTCTCTCTCTCTCTCCTGGTCACTGATAGTCTTGTCTCATGTTCTTAAAGCTTGAGATTACTCTCTTAAATCTGGGGAACCTGCTCCATCTGCTGATCAGTGCCATATAAAATTGTCTGAGCGTAGGACTCTCGCCACGCTAGCCTCCATGGCTATGTCCAGCGGGGGGCACGAAGTCAACAGGTGCACCACTGTTTCAGAGGCTAGGCTTCAG
Contig37977 26 reads, 257 bases	p2	(TG)9	18	168	185	TTTTGAAGGTCGGACACCAACAGCTACAAACACGTTAAGAAATAACAAGCGTGATTCGGGGGACCATTCATAGTAAGTGTCATCATTGGGACAGCTTAAGTTTGTTAGCGTCCATTTATGTTGAGGTTTGCCCTAAATGATATTAGTGAACATTTAAATTGTTCTTTTGTGTGTGTGTGTGTGTGTTTGGGGGAGGGGCATCTTCGGGATTGTCATTTCCACGGGCGGTCTAAGTTAAAGCTAACCGAAGCATCCAC
Contig38055 28 reads, 338 bases	p2	(AG)7	14	160	173	TTGAGCTGGACGTCGACATCCACCAGCTGTACGATGAGATCGCCCCTCTGGAGTTGCCGTGAGACGGACATTGCTGGACCATTAAACTACCCGCTCATAACATCGAGTTGAAAATCTCCGCGCTCGGCCGTGTTCTTAAAGAAGGATCAACGATTTTTAAGAGAGAGAGAGAGAAAAAAATATACAATACANTTTTTTAACATACGAAAATAAATATGATGACAGAGTTTGCATTGTTTTTTTTAAAGCCCAGTTGGTAAACAATCTTATGTAGCTTTTGTATCTTATTATTTCTATTCCGACATTTAGTTTGTTAATGGACAAATGAGAGTACGGTG
Contig38329 36 reads, 310 bases	p2	(CA)5tgcacg(CA)6	28	58	85	TGAGATCGCACAATAAACACTAAGGTAAAACATTAACAAACACAATAAACACACATGCACACACACATGCACGCACACACACACAAAACACGCACACAAACACACACTCAGGCATGCACGCACACACAAACACATACACAAACACACACGCACACAAAGGGGGAAAACCCATTAAATAAGAATGCCGGACTTTGACAAGGAATACAGACAAATGAAAGACAACTCCGTAACTCTGATTGCTCACTGGCAACGCAAGGATTACTGCTGTGAAAACTTAACAATAGATTACCCTGTTATCCCTATTTTTTTT
Contig38635 53 reads, 530 bases	p2	(TG)10	20	286	305	CAAAATTTCATTTAAAAATCAATGGACAATTACTTTGAGTGGAATAATCAATATTAAAATTTAAATTTCAAAGAAATAAAAAAATTTGATTTTATTCTGCTTGACATAAATACTTAAAATAGAACACATCATCACAAACATTATAGCAATAGCTCTGGAGGTGATCGACAAAAGTTTGTGGTGTTGGGGGTAAACTAATGATACTTTAAAAAAGAAAGATCTTCAAAAGCAAAATTTGTAAACTTTGAAGTAATCATTTTTTTTTAAAAACAATATGTGCGATTTTGTGTGTGTGTGTGTGTGTGTCTACTGGGAAAAAAATTGTGTATAACTCCATTAAACCTTACATGGCACAAAAGTTTCTCCATTGCTAACACTGCAGGGATTAGCTAAAGACAG…
Contig38647 16 reads, 276 bases	p2	(AC)11rcatacattcngtcgcaaccaaacgtctcgtgctrtgggcatacmacataacgcacaagaaaacctgg(CA)7cgcatacagtcatcagtaaccaaacgtctcgtgctatgggaaaacaaaataacatacaagaaaacctgg(CA)6	185	73	257	TTTAAATGTTTAGCTAAACCAAAATGTATCATTTGTACCCTTTAACACTTTAATTAACTTAGAGTTACCGTTACACACACACACACACACACACRCATACATTCNGTCGCAACCAAACGTCTCGTGCTRTGGGCATACMACATAACGCACAAGAAAACCTGGCACACACACACACACGCATACAGTCATCAGTAACCAAACGTCTCGTGCTATGGGAAAACAAAATAACATACAAGAAAACCTGGCACACACACACACGCGCATACAGTCATCAGT
Contig3867 1526 reads, 1193 bases	p2	(GA)8	16	1176	1191	GCTTCATGAACAAAACATTGCTTACTTAGAGGTCTGAACTGTGTGTAGGTGGATTGATGTGCTGTAAGGTCCCGTGTATTATTCTAAATAGGATTTAAGTTTTTTGGGTGATACATTACCTATTTTGTCATCAACTCAACTAAATAATTTCGTGAGCTTTTGTGGATTTACACATTTCAAGTAAAAAATGGCGCTCGGTAGCTGTTATACATGTATTAAATACATGATGTTTGCCTTCAACTTTATTTTCTGGTTGCTGGGCTGTGCCATCCTTGGTGTGGGAATATGGCTGAGGGTGGACGAGAATGCCGCCGAGTTCATGAAGGAGTCCTCCAAGATGGAGATCTTCCACACGCTGGCTTACGTCCTCATCGCTATTGGTTTTGTCATCATGGTCAT…
Contig39535 21 reads, 241 bases	p2	(TG)5cc(TG)5ta(TG)10taggtgtgtatacgtatgtgttagtgaatgtgtgtttgtttt(TG)6	98	1	98	TGTGTGTGTGCCTGTGTGTGTGTATGTGTGTGTGTGTGTGTGTGTAGGTGTGTATACGTATGTGTTAGTGAATGTGTGTTTGTTTTTGTGTGTGTGTGAGAGAGATTTTACAACTAAAGTGTAATTGAGATCAGCCCCAAGCTCAACAGGAGGTATCATATGCCAAGTCCACCAACGGTAAAGGAATGTACGCCTGGTTGACCACATATCTCTGCATGTCCTGGTTGCCAWGCTCAACAGG
Contig39758 36 reads, 421 bases	p2	(AC)6	12	207	218	AGAAGTCTTTATTGTAAGCACACAGCATCATAACTTTACATCACAGATATTCAATTATCATTTTAAGTTTTACTTTCAAATGGTTGTACAATATGTACATGATACCTACCTTACACACCCACATCTTTGTCACACACCCCCATACACATCTTTGTCACACACCCACAAACACATCTTTGTCACACACCCACATACACATCTTTGTAACACACACACACATTAAGATGTACTTATTAAATGCTATGAAAGTTTCTGATACTTGTATAATACAAAGGGGGGGGATCTTGGCCACACATTGGCTTTGGTGTAAAACAAACTTGAGGGAATACAGACTGTTGTCTGGTGAAATATGTGAATACAGGCTGTTGTSTGGTGGAATATGTGAATACAGGCTGTTAT…
Contig39878 35 reads, 382 bases	p2	(AG)6tgtgtaaacaattgaaca(AG)6tgtgtaaacaattgaaca(AG)6tgtgtaaacaattgaaca(AG)6	102	3	104	CAAGAGAGAGAGAGTGTGTAAACAATTGAACAAGAGAGAGAGAGTGTGTAAACAATTGAACAAGAGAGAGAGAGTGTGTAAACAATTGAACAAGAGAGAGAGAGTGTGTAAACAATTGAACAAGAGAGTGTAAAAAGTAAACATGAAAGAAAGTGTAAATAAATGAAAGTTGGTAAAAGTGCAAACAAATTAACTTAAGTGAAAGTGTTGCCCTGACGTCAATAGAGCTAGATGTTCAAATGCCGGGTGAATTTGGTAACTAGAGAGATGCCACTATGATAAAAGCGCACATATTATATTAATAAGAAAATACTCAAGATTACACGAAATAGCTCGTAGTTTATTGAAAAGACTAATATTACAAGTGCSCAATGAAATTACA
Contig39914 24 reads, 212 bases	p2	(TG)8catgagtg(GT)7	38	169	206	TAGAGAAATACAACCATATATTTACAACATATCTGCTCCTGTCTGCAATTTACGTGCGATGAACACATACACAAATTGCGTTAAAAAAAGAAATTCAAATGCAGCAGATTTATAAGCAGAATTAATGATTTAAATCATTAACATACATGCTGTTTTAGGCCTAGTGTTTGTGTGTGTGTGTGTGCATGAGTGGTGTGTGTGTGTGTCTGTTT
Contig40161 15 reads, 165 bases	p2	(AT)6	12	62	73	TGAGCATCTAACACTAAAAAMTATGGTTGTCCACCTCAGGCAAATGAAAAAGGTCAACATAATATATATATATCATATATCAAGTTGGTATAATTTACTTTCAAAGTAAGACACACACAAAAAATTGTATTTTGTATAGTAAGAATACCAATGACTTGAGTGTTC
Contig4026 15 reads, 122 bases	p2	(TG)6	12	56	67	CTGCTGAACCGCTCTTCCGATCTCCCGGCATACAAGTACAAGTCAATAGCATTAATGTGTGTGTGTGTTTAAACTTCACGGGATCTAGCAGGACGCCGCGGATCGGAAGAGCGGTTCAGCAG
Contig40742 11 reads, 174 bases	p2	(AC)7	14	104	117	GGGTAATACAATTTCCTGTAAATGCAAACCAATATATACAATTAGCTTTAATTGTTTGATGACATATATCTTGCTCTACCTTGAGACAGTGGCCTGTCAACATACACACACACACACCATGTCAACATACATACACACACCATGTCGACATACACACATAACATTTCCTTTTAC
Contig40837 19 reads, 190 bases	p2	(GT)6	12	163	174	CATTGCTCTGTTGTGATCATTGCTCTGTTGTGATCATTGCTCTGTTGTGATCATTGCTCTGTTGTGATCATTGCTCTGTTGTGAGCTGTTGGGTTTAAAATCTGCATCTGTTAACTAGCGTTTGTCYAGCTCATGTGACTGCTGCAAGAAGGTTTGAAAGACGTGTGTGTGTGTDTGTTKWYCGTTTGTG
Contig41070 12 reads, 200 bases	p2	(TA)7	14	5	18	TAATTATATATATATATATGTGGGAAGCCCAAAGACCTTTAATGGTTAAATGTAAACAAATGCAGTCAGACTTTCTAACACGTGCTTAGTTATGGTATTTGCTTCACATCAAATCAACTTCTTGCACAAGCTTCTGTTATAATGTTAAGCTTCGATTATTTTGGTTGCCAGCAAATAAGAAGCATATAAAAGTAGATTAT
Contig41185 53 reads, 537 bases	p2	(CA)8	16	310	325	TGAACTTACTCAAGTACTCGTTGCTATGGCTGAAAAACTTGACCCACGTATGGTCGAAGAAATTCTTCGTTCAACCAACACCAAAGATGATGCCGAAGGAATGTTTAATTATGAAGTGTTCGTTCGAGCTCTTCTCCAAGGTCCCTTTCCAAATGAATCAACATAAAATACAACTAGAAGAATTCGATTTCAATCTTCATACAAAACAACCAATTTCTCATCGTTTGTCATTCGTCTTCTTTTGCCTGCCTTTCTCTTTTTTTCTCTTTATACATCTTTCTTCTTCATCCTTCTCAGCCCCCTTCGACGCACACACACACACACAATGCACAGCAAGAACAAGGTGTTAACATCAACCCTGTCCCTCTTTCTCTCATCGTTCGTGCATGTATTTCGTGT…
Contig41193 126 reads, 479 bases	p2	(GT)6	12	434	445	AATGCTTATTACAACTTACCAAGAGATATAAACAGTCAACCATGCCATTAGCAAAGGATCTTCTTCACCCATCACTCGAACAGGAGCGCCGCACGCACAAGAAGAAACGACTTGTGCAAAGCCCCAACTCGTACTTCATGGACGTCAAATGCCCTGGCTGCTACAAGATCACCACAGTCTTCAGCCATGCGCAAACAGTCGTCCTGTGCGTGGGCTGCAACTACGTGCTCTGCTCGCCATCCGGTGGCAAAGCCCGTCTCACGGAAGGCTGCTCGTTTCGCAAGAAGCGCGACACCCCGCTGGCACGCAAGGATGACTCGGACCGCAATTGAACTACAGTTTCTACTCCAGCAGCGCGTCGAGACACCTATTCATTAGCAAACGAAACAAGATGCTTCT…
Contig41214 18 reads, 277 bases	p2	(TG)7	14	215	228	TTATCATATAATGTGTAACAGTGAAGCCATGTTTATGTTATCATCTAATGTGTAACAGTGAAGCTGTGTTTAAAGAATGAAGATTGACCATTTTTACCTTTCTCATTGTTGGGCCAAGACCATTTCTTTTATTTGATCTGTTTGGCAAACTAAACGGTTTTCTTTATCAAGGGATTATCTTTCATTTTGTTACATTACTTACATCTGCCTCATCTGTGTGTGTGTGTGTAAATAACTTATCACATCTTTTTTTTATTCATATTTGTTTTGATTCTGC
Contig41433 11 reads, 134 bases	p2	(TC)11	22	102	123	TCTTACTCTTCTATAGTCAATTACACCCGTAGTCTATTTTTGTCTACCATCATTAGCTCGATCACATTTTCGCTCATTCAGTTTGATAATTCTCTTCCGTTTCTCTCTCTCTCTCTCTCTCTCGAGTGGGGATA
Contig41440 14 reads, 191 bases	p2	(AT)6	12	74	85	TTTTAAATGCGATTGGAATATTTATTAGCTTCAAACTATTTACACATAATATATCAATTGATTGAAGACATTAATATATATATATGAAAATAACGCCTCTAATGAAAGTAATCATAGGCTACATTATGTTCTATGATCTTCAGAAAACATTATAGAAACTTCGTAACAGTTAACTTTACTTCTAGGAAGAG
Contig41597 249 reads, 1119 bases	p2	(CA)6	12	202	213	TCCCTACACGACGCTCTTCCGATMAAAAACACATAAAATAATATTAAAAAATTACAATGAATTATAGTCACGTATTTACAGAGTACACTGGCCGGACCTGGAGGTGACCTATGTAGAATTGAATGTTTTCATGTATTAACCAGTCTCACCATAAACACAATTTGTCTGGGTGCTTTGTAAATCAGTTTTCTCATGGCTAATCACACACACACAGCACTCACACACACCTATATTATTTTTTTCATACGATATCAACTTGGCGACCATTTCTAAAAGGAATGGCATGGAATCACCTGTTAACGAATTTAAATGCAAAACTGTTCAATAAATGCTCATCATACTGGAGATGAGCTCAATGTCTTATTACGGTGATTGTTTCTATTGAGTGCTACACAGAGA…
Contig41737 10 reads, 219 bases	p2	(TC)7	14	94	107	GTATCTCCCTTTGACAATCATTTCTCATTCACTCTTATATTTAAAATCTCATGTGGTAAGTGTAAGAGCTCAACGGAAAGATCTGTAATGACTTCTCTCTCTCTCTCTTAATTTCATGTGCGAATCTCCAATAAGGCATGAGCTATCTTTCTTCTTTCATAGTCATTCAACTTAAAGGCAATTTAAAATTACCGTTTTGAGATCGGAAGAGCGTCGTGT
Contig41965 22 reads, 394 bases	p2	(AG)8(TG)10	36	299	334	GAAAAAGTTACCACTTTACTACATGTATTTTAATGAAGAGGATCATTGCCAGATAATTCTTTTGGTTGACATCATTCAGTGTTCATGTATGTGTTAAGTCAAGCGTGTGTTGATGGAGTTGTAAATCAACAACCTCAAGTCTGCAGTTAATTTAATTTTTCTAATTGTTATATTTCACAAAATGGTAATAAAAAATGTATTGTATTTCCAAGTCTTGGTACAATTAATGTTTTAATTCTTGCATTGTGCTTGTCAGGCATGATGTGTGTAGGGGATATATTATTTAAGCTGTTTGTTTAGAGAGAGAGAGAGAGTGTGTGTGTGTGTGTGTGTGCGCGCGCTAAAATGGCCACTTCTCACCAATGCATCATGTTGGGTATATACTTTGATTTAG
Contig42033 11 reads, 150 bases	p2	(AT)7	14	72	85	CAAAAATGCTATAAAATATTGACAATACTGTTTACATTTTTATGCAAATTATGTGTAATGTTTTAATGGCCATATATATATATATAACATAATATGTACATCTGTATTATCATCGGAGTGCCAGTAGAGAGTAGGCTAACTAATGCCGCT
Contig42113 10 reads, 136 bases	p2	(AT)7	14	111	124	CGAAATCATGCAGTCATTGGTAGGCTGGGTTATTCTTAACACGCAGATATAAGTTTGCAACAGCATCTCTTTAGATGCTTATATATAAATTATGTTTTGAGAACATGAAGATATATATATATATGATRAGAACAAA
Contig42157 41 reads, 500 bases	p2	(TG)9gtgccaagttaactc(TG)6	45	131	175	TTTTTGTACGATCTTGTCCCCAATAGGGAAGGTTCAAGATGACAGACATTACATTCAATTTTTCAACAGTTACCTGTCCCCAAATCTCAAGATTATTATATGATGGGTTGTTGGTTGAGCAAGTTAACTCTGTGTGTGTGTGTGTGTGGTGCCAAGTTAACTCTGTGTGTGTGTGGTGCCATCAAGACTAAGCTTTGCTTTGTTTCCTTTCAACCATCAACAACTGGCCATCGAAGTAGGCCAAGCTTTGAACTTTAACAAGACATCTATAGGTTTTATTTTGGCAGTTGAAGACATCTCCACATTCATGCTGAGACCATCTTTGGTATTGGAATTCTCTGCCAAATTTTCCTAAATGATTGTTATTTTTATGAATCCTATGATTGTATGACGGCAGCC…
Contig42250 14 reads, 147 bases	p2	(TG)6	12	84	95	ATTGAAACTAACCAAAATATTTGACTACACATAAACTTTTCTATGAGCTAATTTTGCTCCCACCAGTGCCATTTGCTCCAGTATGTGTGTGTGTGTATTTAATTGGTTTGGTTAAGCAGTTCTTTTTTTTTTTTGCATGGAAATCCT
Contig42336 16 reads, 153 bases	p2	(TG)6	12	51	62	GATCTACACTCTTTCCCTACACGACGCTCTTCCGATCTCTGGATTGTGTTTGTGTGTGTGTGGCTTAATCGAAGCAGTCGTAGGCAACGTTACCGTCAAGGTCGTAGAAGCGATTCAGGCAGTTNCTTCCGTTAGGCTCGGAACAGATTACCC
Contig42572 10 reads, 218 bases	p2	(AC)7	14	37	50	CAACTTTACCAAGAGTCTCTTTAGATAGATTGAAAAACACACACACACACATGTCGTCAGATGAGGAAGAACGCGAATTGAGAAAGAAAATCTTCAAAAATCCAATTGAAATTCAAAAAGCTCGATTGGATCGTTTGATGACTAATGTCGAGAAACCTGTGTTTATTCCGGAGAAAAAAGAGAKCGGAAGATTACCAGATCGGAAGAGCGTCGTGTAG
Contig42638 29 reads, 187 bases	p2	(CA)7	14	75	88	CATCACATGGGGTTCCAATGTCCAGTATTTAAAAAAAATAATCATCAGCATCAATAAGAAAGAAATCAAACAATCACACACACACACATATACACAAGAAGCTGACCGCTATCGTTTGCAGGTGAAACCAGGGGGCTCAGCGACGCAGGTGCCGCCTCTGAAAATGGAGCCCGGCTTGCACGTGATG
Contig43147 36 reads, 394 bases	p2	(TG)7	14	371	384	AATGGCCGATGGGATGCACACTAAATACCTGTTTTCTTGTAAGCTTGTAATTCGATTTCATAGCGTTCTTTCGCTTCTTTAGCGGCCTTTTCGTATTTACGTTTTAAATCATCAGGGGCAGCACGCCATTTTTCGCCGATGACTTTGGCGACATCCGCAACGGATAAAGATGCATTTTGTGATTTGATTTTTGGTCGTTCATCTTGAGAGAATATGAAGAAGGCCGATAAAGGACGTTTGGGTGCATTGGGATCTTTTTGTTTTGAAGCACGTGGCATTTTTGAGTTTGGCGCGTAGAAGTAAAGAGGGCGACAGAAGTCGAAATGAAAACTAGTAAGCGAGGCGCTAGTCTCGATGTAAAATGAATTGATGTGTGTGTGTGTGTCTGTGTGCG
Contig43247 64 reads, 731 bases	p2	(TC)6	12	701	712	AAAATCCTGACTTATTACCRAGCATARAGGGAGCACCACCTGTGCAAATTGAAGAAATTCTTGAAGTCCAGTCAAACTGGTTTTCAGTGAAGAATGCCCTGACTAGCTGCAGCACATCAGCAGCTTTGGTAGTAGCTAGGAGTGGCTTACAAAAGAGAAATTCCTCCTTCAGCAATCCACTGTGAACATATTTCACAAATACAAGAATCTGACTGCATTGTGCTACATCAGTGGATTCATCCAGCTGCATGCTAAATGGAAAAGGACTGCTTCTCATCTCGCACAAGACTTGATCCAGAATGTCTGCAGCCATGTCACTAATCCTGGAATGAATAGTGTCATTGGACAAAGGAACTTTCTCAACCTGCTTCCTCTGCTGGTGACCACACATCAGTTCCA…
Contig43276 118 reads, 1062 bases	p2	(AG)7	14	166	179	TACACTCTTTCCCTACACGAACCGCTCTTCCGATCTCACGCCTTCTGTGCCTGATGCAGATTCCCACGATGGCGGCGATGACAATGAATGCTGCAGCTGTGCAAGTCCCTGCTATGAATGGTGTTTATTTTTTCTAAACTTCGGACAAGGATGAAAAAGGAAGGAAGAGAGAGAGAGAGAAAGAGGTTGAAAACGAAAAAATGTTTATCGTGTTTGGCTAGCGATTTGTCGAAGTTGATTAAGACAAGCTTGTAAAGTATCCTGTTCTTGTTTGGCACTGATAGATTTCTTCACTTCGCTCGTGATCCAATTGATCATATTCGTTCGTTCGAAATCTTTTCGGGCATTTTGTAGGGCAACTTGGTAATCTAGACGACGTTTGACTGCTTCATACATTTG…
Contig43327 10 reads, 159 bases	p2	(TA)7	14	83	96	CTTACTTTTACTACCCCTGTCTGTGCATATAAAACAACAGAGTAATAAAAATGCTTCTGCGTAGAATTACAATTATATACAGTATATATATATATAACATCACTCCTAAATTTAGGTCATATAATGTGCTACAAAGATTTTGTTAGTGCAGTTTTTTTA
Contig43578 14 reads, 320 bases	p2	(GT)6	12	68	79	GTGAAATTCAAACGCTGATCAGTCACCGGTTCCTGTATTACAACAGATGGAATGAAGAGAAAAAAAAGTGTGTGTGTGTGGGTGAGGCTCTAACTCTATATGAAGATTTTGATCTAAGCCAGGGAATGTGGGAGCTAACGGATGATGAGATAAAATTAACATATGATGAGACGAAGGCAACGGATGATTAGATGAAGTTAACATCTCACTTTGATGGTGGTTATACTTCAATCTGTGCTACAAAAATATTATCTGCTTAATAATATCTTTATAAAATRTGTAAAATTTTGTTCAAGAAAGTGANAGAAGCTAATCTAATG
Contig44104 11 reads, 172 bases	p2	(AC)6	12	133	144	CTTCACTACCAATGTAAATAAATGAATGAAACATCGATATCTGGCTCAACTGGTCATCTACTACCAATCATATTTCAAATCAATGTATCCGATCTTTACGCTATGCGTTCACACGGGTTTACACAACAGCGAACACACACACACCAACCCAGAAGTATCCAGCCACAGAAAG
Contig4424 68 reads, 184 bases	p2	(TC)6	12	114	125	AAAAAAAAAAAAAATAGGGATAACAGGGTAATTAAAGGGYTGTTGGAGACCACAACGTTGATAGGTGAGGTGTGGGTAATACACATTTGACACCTCTGTGTTCACTGTATGAGTCTCTCTCTCTCTGTCTGAGTCAAGCGCTGCTGTCTGACAAAACTAATCATCAAACCTTTATAAAGTAAAG
Contig44345 17 reads, 150 bases	p2	(CT)8	16	124	139	GCTGAACCGCTCTTCCGATCTGGAAAGAATCACAGTCAGCAATTATCAGGTTTATCAGCAGCGATATCCTCTAACTACCATTTCAATCACAGTGCTTTCTGAGTACTTTACTGCTGTTGTTTACTCTCTCTCTCTCTCTCAGTAATTATA
Contig44412 11 reads, 170 bases	p2	(TC)5wctctctctgtctctctctg(TC)6tg(TC)13	70	6	75	GTAATTCTCTCTCTCWCTCTCTCTGTCTCTCTCTGTCTCTCTCTCTCTGTCTCTCTCTCTCTCTCTCTCTCTCTCTGTCTTGGGCGGGCGGAAAAACAAAAGTAAAAAATGACCCACTTCMCGGGATCCGATCGAGAGATCGGAAGAGCGGTTCAGCAGGAATGCCGAGA
Contig44619 54 reads, 434 bases	p2	(GA)11	22	75	96	CAACAGCTGGTTGTCCAAATAAATTAGTTTTGGTGTTTTTCAAATATCTAACATTGAAGATGTTTTTATTACATGAGAGAGAGAGAGAGAGAGAGAAACTGAAGTGGGAGATGGACCGGGAGGTTATTTGGTGGCGTCTTTGAGATAAGCGATCAAATCTCTGCGTTCGTCTTCTTTCTTCAGACCAGCGAAGATCATCTTCGTGCCGGGAATGTATTTCTTGGGATCTTTGAGGTAGACCCACAAGGTGTCGTCATTCCAGGTGATGCCCTTGCTCTTGTTCGCGTCACTGTAGTTGAAGCCGGGCACTTGACCAGTTTGTCGGCCGATCAAACCGTGCAGGTTCGGGCCTTGCTTGTTGCCGGCGCCCTTCTCGACGACGTGGCATTGCGCGCACTT…
Contig44839 20 reads, 274 bases	p2	(AC)5aaacaccgacactcatacaaagacacacagacagacgcataggtactgagacacccatccacaaacagt(CA)6gt(CA)5gt(CA)5aacagt(CA)5aaaagk(CA)7g(AC)5	162	100	261	TGCATCTAATTATGACAAATTACCCATCTTATTGTAATATTCAACAAACTTTGAATGTGATAATTTTAACACACGTAGGCATTCACATAAACAACACATACACACACACAAACACCGACACTCATACAAAGACACACAGACAGACGCATAGGTACTGAGACACCCATCCACAAACAGTCACACACACACAGTCACACACACAGTCACACACACAAACAGTCACACACACAAAAAGKCACACACACACACAGACACACACACAAACAGTCACACA
Contig44981 44 reads, 516 bases	p2	(TG)8	16	479	494	GGGTAATCAAAGATGCCAAGTTTGATCCCTTGTTGTTAACTGCCCTTGAGTCACACAACCCAACAGGGGCTAAAGTTCATATAGATGAGCAAGGAATACTCCATTGGCCTGTTATATTTTTCTACCCTGAATATGCAGAGACAGATTTCATTAGTGACTTTAATGAACAGCATTGTTTTTATGACCATCTTGTCCATATGTTTGGTCCAGAACCACCAGCCTGGGATGTTGATCACAAGTACAAAGCTGATGACATTGAGATTTATTTTGAAGACAAGGATGAAGAAAAGTTGTACAAGGTTGATCCTGAAACCAGTCTTCTTCAGGCATTGAAACACAAAAAGTATCTGGTTTATGCAGGCACTCCAGGGTTCATTCTTTGTGTGACAGGTTCCAAGT…
Contig45383 37 reads, 290 bases	p2	(AC)6	12	47	58	GTTTTTTTTTCAGAAGACGTTGAGTTCAGAATAATGCCCGACGCTAACACACACACACGTCTTGATTCTGAGAAATAGGTTTCCCCAGTGTCATGGTCGATCCTATGGGCGGTCAGGTACTGACATGTTTGAAATCTGGTTTAAAAATACAAACAATCTCACTGTGCTGTCAGCTCTCAAAGTCATTGAGAAATGTGTTGAGGAAATCAAATGACGGTCGTGAGTGAGCGTTGCTTTGCCAACAGGTGAGCATGACGTCATAGACTTCCTGCGGGCAGTGGTCTGGCTTA
Contig45442 12 reads, 211 bases	p2	(AC)7(TC)7tt(TC)6ttttcactcccatctctgtctctttattttgttattt(TC)5	89	65	153	GTGCCCCTGGCGTTGGAAGTACGATTCTAATTTCACCTGTGACTTTTTCCTCTTGTCCTGATGGACACACACACACACTCTCTCTCTCTCTCTTTCTCTCTCTCTCTTTTCACTCCCATCTCTGTCTCTTTATTTTGTTATTTTCTCTCTCTCTTTCGCTACCAGTGTTTGGCTACGTCCAAGGGCTGTGTACTCTTGGGTGATGCTACCC
Contig45503 21 reads, 283 bases	p2	(CA)9	18	189	206	GGCTGAACTATTTTCTCAAACCATATTTAAAAAATAATAATTTGACCCCATTTAGCTTTGGTGTGTGAGGGAAAACTAAAAATCACTGATTTAGACCTGAAAAGGGACAAGTGGACTTTGGCTTAGGTGCCAGTAAAGTGGTCATTCACAGAATATTGTAATACATCTGTAGCCTCTTAACAGCAGTGCACACACACACACACACATGTCAGACAGTGCATAGGCCGTCAATACTGGGAACATTCAAGTCAACAATTATTTTGTTTAAGTACTGGTACACCAT
Contig45520 13 reads, 124 bases	p2	(TC)10	20	51	70	TAACAGGGTAATAAGAAACCCGGTTGTCTCTCCTTGGCCCTTAACCCGTGTCTCTCTCTCTCTCTCTCTCCCTCATTCCTTTGGAATATCCACCCCAAACCGAGGCTTCTTTCCTGTTCGTCTC
Contig45614 14 reads, 322 bases	p2	(TC)7	14	191	204	TTGAATTGAACTTTTTCGTTCTCTTCTGTGCTCTTCTATGCTCGATTTACGTATTGACAAAACATCGACGAGGTGTTGCCACATGCAGTTGAATAATGATCATATATATCAATTAAAACAAACACCTGCTTTGAGACATTTTTGCTAAAAAACCAAATACGTCGATGTATTTACCCGAACTATTTTTCTTTCTCTCTCTCTCTCACCACTTCTTCTTCTTCTGCGTCTTTATTTTGCAACACAACTATATTTTTCATCTTGCGCGCTTGAAAACACAAAAATCTTCTTTTTCATCTGAACAGGTATTTCGTGTTTGAAGAGA
Contig45654 14 reads, 230 bases	p2	(TC)7	14	190	203	CGCACACATTCATCCTTTCATGACTTTCTAGCATCTGTAACTCTCGTACTCATTCATAACAAATAACACACGACATATCAGACCTTTAAAATAACTTACACCTGTTTCACTCTCACCGCAATATTTGCATTCAATGCAACCATTTCTAGTATCCATCACACTGCCTCTCTTTGCATCTTTCTTTTTTTTTCTCTCTCTCTCTCTTTCTCTCTTTTCTCTCCCACTCGCTT
Contig45657 12 reads, 166 bases	p2	(AC)8	16	26	41	GAGTTCTCACAAACTGTCATAAGAGACACACACACACACACATCCTTAAGTTTGCATACTCTTGCCATCACATACCACAATTCTCACACCGTCCACAACAAAAGAAGTGGATTTTCATTCATCCAAGAGTTCTCACAGACTGTCATAAGAAAGACAGACACACACA
Contig45762 18 reads, 309 bases	p2	(AC)11	22	36	57	CTTTTGAAGAAGAACAAAATATGATCTACGACAAAACACACACACACACACACACACTTTCAATTAGGAAATTCTCCTAAATGATAACAAATTTCTTCTAAATCAATGGCGGTTTTGTTCGCGTTTAATTCGTTCACCATAAGCACGGGAAATGATATTCCAAGCATCCATATATCGATCAGAACACTGGCTAATGCATTTCTGTTCAGAACTTGATAAACTTCCACCGGGCTTGGTCACACAAGCTTTGAAGCATTTATCCGATAATTTTTGAAGTAGTTCTTGAGCATTTTGAATGGCCAATTGTTG
Contig46622 19 reads, 186 bases	p2	(AT)7	14	127	140	TCTCGGCATTCCTGCTGMACGACGCTCTTCCGATCTGCACATTTGTGCTTTGAGACACCGGGAGGTCACCCATAATCTCAAAGCCGACAACAATAAGATCAAAACAATAGTCACAAGTCACGTGACATATATATATATATTATGTACATGTATACTCTCACAAGCAGTCCAATAAAATAATCTTCA
Contig46646 19 reads, 350 bases	p2	(AG)8	16	169	184	ATATACACAGTAAGTTTGTACTCACGGGTTTGAATGAAAAATTGTAACAAATTCATGATATAAATGACATCAGCACAGTTGTAACTAGGGTTACTAACGCCCCAGGTCACAAACAATTAAGGTTACAAACAACTTCGAAATTTTTTGTCCTCGGGTTATGAATATAGAAGAGAGAGAGAGAGAGCAATATTGAATGTTCGAGACAAATGATTGCTAWCAGTACAAGTGAAGGCCCATGCTGTATGCTAGCCTKGTACTACTAGGAGCAGCTTAATTTTGAAACTGTGTGCAGCCTTGTTTTTTTTTTTGCCTTACAAAAATCAGTAACAAAATTAAGAATTAAGTTTCTT
Contig46815 10 reads, 170 bases	p2	(TA)6	12	125	136	TCTCCCCAAACCACAACTGTATTTCAAGGCTACGTTTATCTTCTATATCTGTTTATTTTTATTTTTTTTACATAGCTATCAGAATAACAATGCTTGCCTAAAAAATACAACCTATTGTCAATGCTATATATATATACACACATTGTTTCCACAACTTTCCAGAAGTTTAT
Contig46929 10 reads, 158 bases	p2	(AC)6	12	105	116	GATTAACTATCTTTGAGAATGCAAGACATGCTCATTTCACATTTTATCACACACAAACTTTCTTTCACCATTATTATACTAGAGCATTGCAACAACTAACTCAAACACACACACACAAGTTCATTTCTTCCATTTTTCTTGATGTTGATAGGATGTCA
Contig47147 10 reads, 209 bases	p2	(TG)6	12	6	17	TATTTTGTGTGTGTGTGTTTTTTTTTTTTAGAGTTGCTGATTCTGTCCAGCTTGGTGTTTCGACCAACATTCCAACTTTGAATGTTCATTCTTGATGCAATGTTATTCTTAACTCTCACCATTTGAGCTTAACTGATCAATTTCAAAATAAACTTCTTTGATAACTAATTAAAAAATGACCGAACTGTTTCAGCTTAACTGATCATTTT
Contig47245 14 reads, 193 bases	p2	(TG)8	16	118	133	TGCCATGCTACAATATATTKKRTTATTAGCCTCAACACTGAGGATTTTATTATCCTTGACTAGAGATTACACTGTATCCTAGATGGATTTGAGATTAGACCTTTATCCTAGATGGATTGTGTGTGTGTGTGTGTCATATCAACCAATTGGATACCTGGAATAAATGAGTTTATTGTGTAAGCCTTGACTTTGT
Contig4748 1498 reads, 867 bases	p2	(AC)7	14	26	39	TCTGTCTCCACATACATATAGATATACACACACACACACAAATAGCTGAGGCTAGTGCAGATATTCTGCGAGTCTAAAATGACCTCACATCGCAATCGTCCTCTAAATCTGTTTCAACACCATACCAACTCTCGCACAACTCATATTTTAAGCCGTTAAAATCTGGGATTGGGCTTGACGCCGTATGCTGGACCCCCGTTGGCCTTCTCCTCCTCCTCCTTGATACGCACATAATCGGTGGTCAGACACAAGGCGGCAAAAATGGAGAAGAAACCAGACAAAACAGCAAATCCAAATGACCACGAGAGGAAGTTTGAGTCTGGGTTGGGCAGCCACTGCCTGTCGATGTCTGCTTTGATACCAAATATGGTCACGGAGACCCCAATCAGCAGGAATGAC…
Contig47590 19 reads, 381 bases	p2	(CA)6	12	135	146	ATGTACAAAATGCACTGTTTGTATTCGCTCGAAAATGTCATAGAAATACAATTCTCTATTTATATTTTATTATTTTGTCAAGGATTACGTGGGATAAAACATAAGCCGTTATGGACACGTATTTATTTAAGATGCACACACACACACTAAGATATGTATATAAAGCACTTACACAAACACAACACAGAGAAAAAGTTGAAAGGTCGTATGGAAAATACATACAAAAGTTATGTGGATGGTACATGGAATTATTCATTATGCAAGTCTCTAAACGCGATGTAATGGGCAATCGTAGGACACAATAATCTTCTGTTTAGAAGTAGCGTCTTATGACACATCTTTTTCAAAATTTTANTTTCAAAATTAATTAAACAAAATTTC
Contig4794 1663 reads, 847 bases	p2	(AT)7	14	17	30	CCCGCATTCCTTATACATATATATATATATACGTGTACGTATATTTACTTTTGAATAGTTAATTTTTGAAATTATTTATATATAATATCTTCATTAATGTTTTTAACGTTAAAATGTCAACATTAAATTCCATCAATTTTTTTTTATTTAAATCGTTAGTGGACAATTGGATACTAATATTGGTAAAATATTTTAATTGTAAAATAAACATCTGGATGTATTAACAGTTTAAGCTCATTTCAGGATTTCCAGCCATGCACAACTCCACCGTCTCAAGCATTCACCCTCTTGTCCATGCGGCCAATCCATAATCCTAATCTTTCTCCGAGTTCTTTCGACCTTTCCCCTTTTCGCTACCTCGGCCAGTCACAACATCCAGAAATGCGTTCTTGGCCTTTT…
Contig48119 11 reads, 299 bases	p2	(TG)6	12	126	137	TAACAGGGTAATATAACCTGATACTAGTTAAATTTATATCGATGTTCCATCTTCATACAAGACCTGCCCTACATCTAAAACATTTTGTCTATTCTTAGTTAAAATTGTAACTCATTTTAAGATTTTGTGTGTGTGTGCGTGTTAGCAAATGCCTAGTTTTTGGCATTAATCAAAAATATCAAATTTTAGGTTAAATTATAGCAAAGCACCAAMAAAGAAAAGTGGTTTACTCATTTGTGTATAACGTCATGTACAATTTAAAAAATTTGATTAATTTCTTTAAAAAAATTTTATAGTAC
Contig48235 12 reads, 211 bases	p2	(TG)6	12	182	193	TGTCTGTTTGCCGAAAAAAAAATTGTATCGATTTTTAACCCACTTCGCCGTTTGCTAGCGAGCTGAAATTTTGCAGCAGATTCATGGTGACGATAAAAATTATCTTTCAAAATTTCACATCGATCMAATGTGCTGTAATTAAATTAATGAATTTTTAGATCATCTCTATTTACCATGTTTTTGTGTGTGTGTGCTAGAGTTTCGCCCGGCG
Contig48455 11 reads, 116 bases	p2	(TG)5atagcctatttt(TG)5atagcctatttt(TG)5atagcctatttt(TG)5	76	27	102	GGGTAATGTGTGTGATAGCCTATTTTTGTGTGTGTGATAGCCTATTTTTGTGTGTGTGATAGCCTATTTTTGTGTGTGTGATAGCCTATTTTTGTGTGTGTGATAGCCTATTTTTG
Contig48466 30 reads, 300 bases	p2	(CA)6	12	20	31	AGAGAAAAAAAATTTCCCCCACACACACACAAAAATACCCCGCCTACCATTTATCTCTGCTGCAAACCACGCTGATGGCGATTACATTAATCGCGGATGCAAAGCAGCCACCTGAATTAATCTCAAACTTAGCGATCAGACTTATCACCCAACCAAATCTACTATATGGCTTAGTATATTATAWCAGTTATTTATCTGTATGACAGGATTTGAACCGCATCCCATCGTACAGAATAACCCATACAGAACAAACTTACTGAGRGACCTCTACAGARCCAACCCGACGTAAAMAAATCTCTA
Contig48502 13 reads, 196 bases	p2	(TG)6	12	111	122	TGTACAGACTAGAAAAAAGCACGCAACTTATTCACCAAAGTGAAGGATGACTTATCAGAGTTTGACTTAAACTGCATTTGACTGTCAAGTATCCAGGTTGGGCTACTGTTTGTGTGTGTGTGTKTGTGTGTTGCCCCCATGGCCCACTGTTTATGTGTGTGTTGCCCCCATGGCCCACTGTTTATGTGTGTGTTGC
Contig48593 17 reads, 323 bases	p2	(GA)7aaaaccgtttgtttttgactagtaaa(AC)6	52	74	125	AATGAATAAAAAAAAAGAAAGAAAANGAAAAACCGTAGAATAAAATTGAGCACACATCACATCTGATCCTTTTGAGAGAGAGAGAGAAAAACCGTTTGTTTTTGACTAGTAAAACACACACACACAGCGAGGGAGGAAAAAGAAAGAAACGGAAATATATCTGATTATTGTTGTGGTGCTTCTTCGGATTGTGCTTTCGCCACGTAGAGATTCTCATCGATATGACGTGGAATGGGTAAAATTTCCGTGCCTAATTCTTGTTCAACCTTGTGAACAGAAAATCGATCTTCGTGGGTGATCAAACTAATGGCGATACCCAAATG
Contig48720 17 reads, 271 bases	p2	(CA)6	12	19	30	CTTACTCATCTGGTAAGTCACACACACACAATTATGCAGTATCTTTACCTAGAACTTGTACTGACATGCTTTAAAAACTGAGCCTCTTTACCAAGGTTACAATAATTTGTAGCTGTGTGTGTATAGTTCTGAACACTTACTCATCTGGTAAGTCACACACACACAATTATGCAGTATCTTTACCTAGAACTACTAGAAACATAATTTGATGTTTTGGCAAAGATTAGGTTGACATAATACAAGAATACAAAGGACTTCTAAAAAAAAAAAA
Contig48720 17 reads, 271 bases	p2	(CA)6	12	154	165	CTTACTCATCTGGTAAGTCACACACACACAATTATGCAGTATCTTTACCTAGAACTTGTACTGACATGCTTTAAAAACTGAGCCTCTTTACCAAGGTTACAATAATTTGTAGCTGTGTGTGTATAGTTCTGAACACTTACTCATCTGGTAAGTCACACACACACAATTATGCAGTATCTTTACCTAGAACTACTAGAAACATAATTTGATGTTTTGGCAAAGATTAGGTTGACATAATACAAGAATACAAAGGACTTCTAAAAAAAAAAAA
Contig48784 31 reads, 507 bases	p2	(AG)7	14	44	57	ACAATGTAAGTAACTAAGGACATGTTTGGGTGTATAAAAAGAAAGAGAGAGAGAGAGAAAAGGATGATAATGTTAATTCTACAACAAGGTATAGATCGAAATGTTGTGCTTGATCACCTTTTTCTTCGTTTATTTCTTCCATGTACCAGTTTCATAATCCCATTTGGATGATAAACCAGTCATTGGACCTTGACGGGCAGCAATATGATATTCCAATTGTCGCTTCAATTTCGCATCACCCATACTATCCGGTTTATCAAAATGATARCATATACGTCGCCATGCATCATAAGCGAAGACAAAACCTGATAAAGCGAGCAATGTCCATCCGATTGACCATTTCCAAACTCCAGTTGGTGCTGTGAATTCTTCGAAAGTCTGTCGGAAACTCGCCCGATA…
Contig4882 1662 reads, 758 bases	p2	(CA)6	12	736	747	AAAAAAAAAATAGGGATAACAGGGTAATGCACTTGTTCCAGCGAGAAGCCATCGTTAAGAGTGTCTGAGGTTCCTTGAAAAGGAGCCAAGGTTAAAGTAAAAAGCCTACTCTAACATCGACATTCAAGGCAGTGACTTCAATGGTTATGGAAATGACCGGATTGTGCAAAACGATTTTCCGGCCGTTCAGACTCCTGACCTCAACACGCACAGTTTTGAGATATGTGACGTCAGGGCTCACGTCGCGCCACCTACCCCCGAGGGATGCAGTCGCGGTCGACGCTAAGTGGGTCAACTGCCAGGACCGCGCCTTTACCACGACCAGTGCTGACCGCTACAGGTTGAAGGGAGAGAAGAAGCTGAGGAAATCCTCGACGCCTACCCGCCGTGCGTCTAACT…
Contig48908 20 reads, 388 bases	p2	(GA)6	12	113	124	ATACATTATTACAGGAATTCATTTGACAAACACGCACCGAAATACAACAAAACACTACTGCACAAGACAAACGAGAGGGAGATCCAGAAGATGAAGAAATTGAAGAGCGAGCGAGAGAGAGAGAAAGAATCTGTTATATATATGTATATACGTGCGTGTGTGTAGAAATCGTTCGATGGGACATTTTTATGAAGGAAATTTAGGCGGGGAGCCGACGATAGCTGGTGAAGTTGTACCGGGGGATGAAGTTAGTACAGAACTTCGTCTCGGACGATCAGCATCTTCCATCGACATGGCACGAGATAGACGACCAAGACCTACCAAACCTGCTTCCATCGGCACTCCAGATAATAAACCAATGCCTTGCAAGAAGAATTGCATTGATTTG
Contig48985 24 reads, 479 bases	p2	(TA)6	12	428	439	ATTTGCNAAAACTTTTTTTAAAGTAACATTGTTTACTTTTAAAACTTGTGAAATATGTGTTGTACTTGACAGACTGATTCTGTATTTAGTTCCATTTGTTATTAGGTTTTCAATCTACTTAATATGTCAACACCTATTGGAGTTTTTCAATAGAAATATTAGTCTTAAGGTTAGTGTGATCTGCTTCACTGAATTCAGTCTTGGTCTACACTGTCACTTCCAGCTCTGTGGCACCAACATTGATGCATCTTTAGCTTGGAGACCTGTATATATCCATGTGTATATTTGCTGTACAGTTGCCTAATCATCAGCTAGCTCCCTAACTACTTGTACTTATTCATTAGATCAGGTGAACTTTGAACTTATGGTTGTGGTGTGGTGTATTTTACACTTCTGGAC…
Contig49031 12 reads, 153 bases	p2	(GT)6	12	22	33	TAGCGCCAAGAAACAAAGAACGTGTGTGTGTGTTTTTATCAGGCCTGGTTAAATACACAAGAACAAGAATGATCGACGTGTAGGTAGCTTTGCTTGATGTTTAAAGTAATGAACAAGGATTTTTACGTTTCTTCTTTCGAGCTAAAGCAGCTC
Contig49237 16 reads, 260 bases	p2	(AT)6	12	12	23	AAAAAATAATAATATATATATATAGTTGTCACATTGTCGTTTTGTCACTAGTCGTCTTGTCTGGTTATCAGTCCTATTTCTATTCAGTTAGCCTAAGCTAAACTTGTGAACTTAGGTCATCAAATATGATCAATAGCATCTTTAAGTTCACCAAGCTTTGATTGAATATCTTCAATTATGGTGTCAACACGTGTCTGCCTTTTTATCTTGCTTCCATTCTCTCTGTCTGTTTTGGGGAGCCTATCAAGGTAGCAGATCGG
Contig49256 19 reads, 275 bases	p2	(TG)8	16	252	267	ATTTCAACTCAGATTTTAACTATTTATTTTAATCTCATACTAGTAATACACAATAACATTTTATATTCAAACAGACATTATGTCAAAATTTTAATTTTTAAAAGTTTGGAAAAAAAAAGCACTCACTAAAGAAAATTATACTTATACAAAACAAAAATGTATTTTATATTTTAATTGATCATTATAAACAATAGCACACATAAATGTATGTCACGTTTCCAGTCATAATCAAAATTGTGTGATTAGGTTTTTGTGTGTGTGTGTGTGTCCCCCCC
Contig49319 16 reads, 176 bases	p2	(TG)6	12	165	176	GAGGRWAATACCATGCTTACAATTGTTTTTACCTTGCTATGTTCTCTTAATGACTAGGAGAAATTKTTTCCAGTTTTACTGTGACATTTATGTATGGAAGGTGCAGGCTGTTTTATTTTAAGCAGCTACCTAGATATGTTTGTCAATTGTTTGCCAAGGGCAAATGTGTGTGTGTG
Contig49451 13 reads, 186 bases	p2	(GT)8	16	49	64	AATGAAATAAACACTGTCAAAATTTTAAGTATGAAAGTGAAAGACTCAGTGTGTGTGTGTGTGTCTATTATTTTTGTAGCTGTAAATATGTGGGCTTTTGCCATTGACCAGCTGAAATTAAAAGAAACCTTGTATTTAATTTCTGAAGTTGTGGTTTCTGTTGAATTATTTCATGTACCAAAAAAA
Contig49553 17 reads, 288 bases	p2	(AC)6	12	244	255	AGAAAGTGATGAGTTTATACCATACCATGAGTTTATACTATACCAAGAGTTTATACCATACCAAGAGTTTATACCATACCTAGAGTTTACAGGCCACTTGTTGCCTGTACACAGTTTGAATCACACCTCAACTGAAAAACTAACGCACCAATGTGAACACCAAGACACAGAATGAGACCTATCAGATTACATTTTCCACTGCCTAGCACTTCAAGACTTATACCTAAACAAACCAGAATACAAACACACACACACTAGTGACCATGACCAACTGCTGTGAGAGTGTAC
Contig49818 14 reads, 185 bases	p2	(AG)7	14	115	128	ACGTAGAGCACCGACWGGACTCAGAACGAGGCTGGCTTATCTTAGTGCAGAGACTGGCACGGAGATTTGGGTTATCACACGTGAGGGTAAAATGTGGGACGGGGTAACCATATCAGAGAGAGAGAGAGGACATAACAACACTGGACATCCACGATGTCGCACATACCAGCTGTGGTCACATCAAA
Contig50049 14 reads, 108 bases	p2	(CA)6	12	27	38	CGATCTCGCGAGAACACCTCCTACACCACACACACACAATTGCCGTCTTTCAACGGCATTCCTGCTGAGATCGGAAGAGCGTCGTGTAGGGAAAGAGTGTAGATCTCG
Contig50405 33 reads, 478 bases	p2	(TG)6	12	9	20	AATTACGCTGTGTGTGTGTGTCTTTACATCAGTTCTTTGTTATCTTTTTAGAATTTCATAAAACACTTTCCAATTTTAGTTACGAACCACGATAAGCAATCATAATGGCTGAAGGACTAACTGATGATCAGGTGAAGGAGTTGAGGGAAGCTTTCAATCTGTTTGACAAAGATGGCGATGGCTTCATCACAACCAGTGAGCTTGGCGTTGTCATGACGTCACTCAACCAGAATCCTTCTCAATCTGAGCTCCAGGACATGATCAATGAGGTGGATGCAGATGGGAATGGCACAATTGACTTTAATGAATTCCTGCGGATGATGTCAAGGAAAATGAAAGAAACAGACACTGAAGAGGAACTCAGGCAGGCTTTCCGGGTCTTTGACCGCGACCACAATG…
Contig50415 10 reads, 211 bases	p2	(GA)7	14	186	199	ACACTCTTTCCCTACACGACGCTCTTCCGATCTTTGTGGGTGTGGGTCAAATTTTGACCACAAAATATTTTGTGCTTGATTATTAGAGATCATTGTGCTTTAAATAGAGGGGTAAAAAATTGTCAAACAATTCACACAACAAGCTCAATGTGTGGAAACATAGCAATCTGGATGGGGGTGGGGGTGAGAGAGAGAGAGACAAACAATGGAA
Contig5044 37 reads, 248 bases	p2	(AG)7	14	110	123	TTGATCCTGCCAGTAGTCATATGCTTGTCTCAAAGATTAAGCCATGCATGTCAAAAATAAGATGACAAGCAAGCAATACAACATTCAACTTTATTTTCTAAGTTTAGATAGAGAGAGAGAGAGGACACACTTAAATGTTTACATAGATGTAGCAGTGCTGAACACTACAAGCAATCAACAGTCAACAGGGTAAACGAAGCAAGAAAATGGCTACCGGAAGCAATTACACCAAGGAGATCGGAAGAGCG
Contig50637 17 reads, 406 bases	p2	(CT)6	12	56	67	CAAGTCTTTAACAATTTGAGGCAACTCGGAAACAGGTGCCCTGATCTGTTTCATGCTCTCTCTCTCTCGAAGTGTTGCAGAGTGTGGCTCCTTCAAGCTGTCAAAGTCAATTGTTATTCCATAAGGTATAGCTATTTGATCAGTCCTGGCGTAGCGACGTCCTATGGAGCCACTGCTATTGTCAACTTTATGAGATATATCCAAATTGGTCAATGCCGATGAAAGTTTCTGTACAAATGGGTTAAAATCAGGATTTTGACTGAGAGGCAACACAGAACATTTGTAGGGTGCAATCACTGGAGGCAGTGACAGATATGTTCTTTGTTCATCACCCTCTCTAATTCTGAAATTGTGCTCAAAGATTGAATACATAATTCTGCCAATCCCAAATGATGGTTC…
Contig50748 21 reads, 467 bases	p2	(GT)6	12	241	252	AATAAATAAACTTTATTACTTGAGGAAAGAATCTAACTTATCTGACAAAGCTAAAAGCTAAAACACCAATAGAATGTCTAAATAAATGGTGTCAAATTTTTTGAAAATTGGGGCGTATTCGATGAAAAAAAATAGGTGGGGACTGTATTAAAATAATAAACAAAAATTGCATTCTAAAAGACTGATTTACGGGATTTTCTATTATAGTGTGGATCTGCGCACGCGTACGTGCGTTTGTAAGTGTGTGTGTGTGCGTGCTCACGTGTGTGCTTGTGTGCGTGTATAGTTGTTATTGATAAATGTTATATTTTGAAATTTATTAGATATTAGTAATAAAATGCATACTTTAAAAAAATGAAACATGTTAAAATGTAACTACATACGTAAATAGGGTCAAAA…
Contig50877 20 reads, 471 bases	p2	(TG)9	18	411	428	GGGTAATCTTCCACCGGTATCTCAACGATTGAATATGTCCGAACGAACGATACTTTCTCGTTTACAAAATGGTCAAACTCAATCATCAGCAAGTTCACCATCAACGATTAATACCGCGACTACCAATGGCAATGGTTATGCCTATGCCAATTATTCCAGTATCATCGGACCAATTGCTCTTCCCGCCGTGACGAACAACAATAAAACAACGAATAATAATCTTTCAGCAACAACATCCGTCGATTCACCGACACGAAAATCATCAACACCGAATCTCATTCAATGATGATCTGATGGCACTAGTTCTCCTTCTCCCCGATCTGTTTGTTTGTCTGTGCGTCTGTAAACACAATGTAAACATTCTTTTCGTCGCTCATTACTATTAGTTGCTATTACTTC…
Contig50961 10 reads, 178 bases	p2	(CT)6acctgggcaccgtgtga(CT)6	41	102	142	AAATAACTAACACAGGAAGCACAGTGTACAAGTTTGTTACAGTCACTAAGCAATGCCCTACTCTACACTAAGTTTGGTACACCTAACTAAGCACCGTGTGACTCTCTCTCTCTACCTGGGCACCGTGTGACTCTCTCTCTCTACCTGGGCACCGTGTGACTCTCTCTCCCTAGGCGCC
Contig51766 17 reads, 320 bases	p2	(TG)5actg(GT)6	26	180	205	TTTTACTAAAGAAAATACGACTTTTGAGAAGTTTAGTGCTGAAAGTAAAACTAGCTCTGTAGTTTTAGTGCGTATGTATTTGTGTGTTGTTTTTGTGTGTCCTTGTTTGAATTTGCGTGTTTGTGAGTGTGTTTTTGTGTGTGATTGCGTGTATGGCTGATTTTGTATGTTTGTRTGATTGTGTGTGTGACTGGTGTGTGTGTGTTTGAGGAAGTCTATGAGATTCTTTGACATTGAGTACTCACAACCAACAAGACTGACTCGTTTGTTCACGGTAAAATATTCTATTTTCTCTAGCAGGCGACTGGTCAAGATCTGAC
Contig51801 21 reads, 179 bases	p2	(CA)7	14	91	104	AAGCATGCTGCCACTATTCATCCAGCTTCATACACACACAGCAAACACAGATAATGTGGTGTGAGCGTGGTGCCACCATTCCTCCAGCTTCACACACACACACAACAGACAACCCTGTCTTAGCATCAGTCCCACAATGACAGTCAAACAATACAACAACAAAAAATAAAAAGTCACCG
Contig5230 29 reads, 246 bases	p2	(CA)5aacacacccag(AC)6atacacacgcacgcgagcacg(CA)6aacacacccag(AC)6	89	126	214	ATCTACACTCTTTCCCTACACGACGCTCTTCCGATCTTCTTCAACACAATTCAACACTTACTATCTAGAGGATGTGCTGTGTTATACTACAATATTTAATTTGAGCAGCGTGGGAAGTTTCAAAGCACACACACAAACACACCCAGACACACACACACATACACACGCACGCGAGCACGCACACACACACAAACACACCCAGACACACACACACATACACACGCACGCGAGCACAGATCGGAAGAG
Contig52879 19 reads, 228 bases	p2	(GC)6	12	109	120	TGGCTTTCCTCGGAYTCTTTTTCATTTTTATTCTTTGCTGGTACAATAACAGAAACAAAACAAAATTAATCGCCTGGATATTCTTTGTTTAATTTTGTTTGTCGATCGGCGCGCGCGCGCAGCTTCTCGCGGTTCTTAGAAGAAAAAGCCGAGCACTTTGCCACCGGTGTGCTTGCGGCGCGCTTCCTCGTGGTCGAGAATGCCGTGCGAGGTGGTGAGCACGACGTA
Contig52961 13 reads, 267 bases	p2	(AC)6	12	10	21	AACATGGAAACACACACACACAAATTGAAATTAAAAATAGAAATCAGGATTTCTAATATGTGGATGTGGGGGTCTGAAAGTGCTAACAACAACAAAAAATTAGCGGGATTTGGATATTACACTATTAGGCTTTACATGTAGATGAACATAAAATGATTAGCCCTTCTCTCCCCAACAATCAATTCAAAAAGTAAAGAAAACATTCAATTTTTTTAAAACGGTTAATGAATAATTTGTGTTCATTAACACTGTGTAGAGCTCATCACA
Contig53381 17 reads, 241 bases	p2	(TC)6	12	28	39	GTAATAGTCCAAACATCTTTTCGTTATTCTCTCTCTCTCGACACGCGATGACGAAGGCCAAGACAGTGACCACGACGAAAACGCTCGGCAAGAAGAAAGCCAAGGACCCGAACGCGCCCAAGCGATTCCGCACGGCGTACATTCTCTTCTCTTCGGAAAAACGCGATGCAGTCAAACACGACAATCCCTCGCTCTCCCCCAAGGAAATCCTCGCCGAGCTCGGCGCGCAATGGAAGTCAGC
Contig53435 57 reads, 473 bases	p2	(GT)6	12	153	164	AATGTGAAAAAGTCTGTCTATACTCTTCCTCATCTCCATGACAGGTAAGCTAGCCTCTGGGAATTTCTCATCAACAAACAGTTCTTCAAAGCTACACACAAGATAATAGTTGCGTATGCTTGGCAATCGGGTATCATGGACAGTAGACAATGGTGTGTGTGTGTAATCGCATAGATCACCTATCTTTTAGTTCCCGGGGCGTGCTACTGACCGTATCTTCAACCTGCACGATGCAATGATCGTAACAGCAACAAAGATGGTCGATACTGTCTGCATTAAATGACATGAAGCTTTGCCACCAAAAGCAAGTCTAAAGTCGGACTTAATGAAAAGGAAAACAGGATTGAAATGAATGGCTAATCGTGGAGAAAGTTTATACCGCAGGCAGGGTACAAGGCA…
Contig53686 12 reads, 274 bases	p2	(TC)6	12	17	28	GCATTTTTTGCTTTTTTCTCTCTCTCTCGCTGATTTAGCTCAATAATAATGAACGATAAGCAATTGAACGCTTTGGTGGAGAAGGCGATTAAAGCCAAGGAAAACGCTTACTGTCCGTACAGTAAATTCAGAGTGGGATGTGCTCTACTTACCAACGACGATATCATTTATACGGGTTGTAATGTAGAAAATGCATCATTTGGRCTAACCATTTGCGCTGAAAGAACAGCTCTATGCAAAGCCGCTTCGGATGGACACCGGCAATTCAAAGCTA
Contig53725 11 reads, 184 bases	p2	(AG)7	14	155	168	TCTGTTTATTGTTACTTGAGCTCAGCTTTCTKTGAATACACACAAACATCGTACATACATATATAGTTACACTCGAATAAAGAAGGGAGGAAAAGAAGATGTTTCTATGCTTGTCCATTTTCATTCAACACGAAAAGAAAGAAGAGCTTAAAAAAGAGAGAGAGAGAGACTGCGCTGCAGCTGC
Contig53741 12 reads, 184 bases	p2	(TG)6	12	7	18	CTMATTTGTGTGTGTGTGTATTAGATGAAGGCAAACAATATTATTTCTATCCACCTGTCCTTGACCTTATTTATAATAAAAAATTTTACACGCCCTTGCCTAAATACAATAGAAAAGGTTCAGTTGTACTGTACTCAGCAAAGCCGTTCTTATACAAAGGTTTGCTATTTATGAGTTTTAATGT
Contig53754 21 reads, 242 bases	p2	(TG)5actgtt(TG)8ccttttttgtgtgtgactgtt(TG)5actgtt(TG)5tctgtt(TG)5tctgtttgtatgtgtgtctgtt(TG)6actgtttgtgtgtgtctgtttttgtgtgtgactgtt(TG)5	175	68	242	AGTCGGATGAGGANAAATGTGTGTGTCACTGTTTGTGTGTGTTTGTTTGTTTTTGTGTGTGATTGTTTGTGTGTGTGACTGTTTGTGTGTGTGTGTGTGCCTTTTTTGTGTGTGACTGTTTGTGTGTGTGACTGTTTGTGTGTGTGTCTGTTTGTGTGTGTGTCTGTTTGTATGTGTGTCTGTTTGTGTGTGTGTGACTGTTTGTGTGTGTCTGTTTTTGTGTGTGACTGTTTGTGTGTGTG
Contig53793 18 reads, 186 bases	p2	(TG)7	14	167	180	CTGAATACCAATAGGGAAACGGTCGTACACAGAGCTATGTGTCTGACCATAAACATGTATCAAAACTGTTTGTTATTCTCATCGGCTGCACATTTCGCTGCCATTGTTTTTTCAGTAAAATAAATTTATCAAGATTTTGTGCCTCGACAAACACGGTTTAATATTTTGTGTGTGTGTGTGGTTATG
Contig54041 17 reads, 241 bases	p2	(TG)6agc(GT)9gagc(GT)5	47	96	142	GGGTARTAMTGCTCGACTTGTATTCTTCAATGCTCTATATCTGGTTTTAAGGTGTTATCTGGGGCGTGTCATAAAGCAACATTAAAAGGAAAGATTGTGTGTGTGTGAGCGTGTGTGTGTGTGTGTGTGAGCGTGTGTGTGTGCTTTGCCTCCTTTTTCTTTGCACCAGCAGTCATTACAAGCTAAATAACCCGGTTTGTATGTGCTAACAGTTGCTCGGCGGGTGTGGATAGTGGATAAG
Contig5430 39 reads, 338 bases	p2	(AG)5g(GA)7	25	47	71	AAGCTCTATAGTTTTTAGTGAGAAAAATACATATATTAATATACATAGAGAGAGAGGGAGAGAGAGAGAGAGCAAGAATGTTTTAAAAAATAAAATTAAACTTTATCACATAGCAAAGGGATTCAAAACGTTTTTCACTTGTTTCATCTTCTGGAGCCCTTGATCCTTCTAATTCTGCGGCGCGAAACGCCTGCACTGACATCTGTAGTAAGTCGAGCGTCGTCCCGGGCATTGAGAAGGAGGGGCCACGACACAGACTCCAAAGTGGTAACCTAAATCTTTACAGGCGACATCACAGGTGTCAGCATCATCCACGTCAAAAAGATCGGAAGAGCGGT
Contig5433 898 reads, 945 bases	p2	(TG)8	16	646	661	CGGGGATAACAGGGTAATTCAACCTTTGACTGCCCAGAGAAAGTCAAACTTGGAACTTGTGATCTCATTGAAGAAATTATGATAGGAGAGGACAAGCTTTTAAAGTTCTCAGGTGTGGCATTAGGAGAAGCTTGCACTATTGTGCTGCGTGGTGCCACCCAACAAATCCTGGATGAAGCTGAAAGATCTCTTCATGATGCTCTCTGTGTTCTGTCTCAGACTGTCAAGGAAACACGTACAGTATTTGGAGGGGGTTGTTCTGAGATGCTGATGGCTGATGCTGTGAGCAAACTAGCAGCCAAGACACCAGGCAAGGAAGCTGTTGCCATGGAGGCTTTTGCTAAAGCCCTGCGACAACTTCCAACTATAATTGCTGACAATGGCGGGTATGACAGTGCT…
Contig54431 17 reads, 124 bases	p2	(GT)6	12	59	70	CTGATATTTGCTGGTCAGCTGTCCCGATGGGAGTGGGAGGGTCATCAAGTCGATCTGYGTGTGTGTGTGTTATTGTCCCCATGGGACGGTGCTGATGCTAGTTGTACATTCAATGGTGTGTCCA
Contig5466 50 reads, 270 bases	p2	(AG)61	122	115	236	GCATTCCTGCTGAACCGCTCTTCCGATCTTAACAGGGTAATACATTTACCAGAGAAACTATTTTTTGCTTTTGGACATTGTTCAGGAAATTTGAAGCCAGCCTTCGTTGCCAACAGAGAGAGAGAGAGAGAGAGAGAGAGAGAGAGAGAGAGAGAGAGAGAGAGAGAGAGAGAGAGAGAGAGAGAGAGAGAGAGAGAGAGAGAGAGAGAGAGAGAGAGAGAGAGAGAGAGAGAGAGACAGGGACAGACAGACAGGCAGAGAGACAGACAG
Contig55389 10 reads, 245 bases	p2	(CA)6	12	23	34	CTTTACCTGAAGCAAACTCTCTCACACACACACATCACACTTTACCTGGGAGCAAAGTCCACAGTGTTGACGTTGTAGCCAGCGTAGCAGAAACCTTCAAACCCCACAGCAATCGCCAGCAGTGCCACAGCGTAGTCGCGATTCTCACATCCAATGAAACCAACCCCAATAATACAGGACCCCGCTCCTAGGAAAGCTACGGATTGGAGGAGTCTWCTTGTGGCAGNTGTGCTCAGGAACTTTTC
Contig55424 14 reads, 273 bases	p2	(AC)6	12	147	158	TACAAAGGTCGCCACAAAAAGTTTTATTAAAAAAACAAAAACAAATAAAAACACCATTTAGAGGCCAAAACAGCTAGTCCCATTTTAAGAAAGCAAATTGATACAAATTAATGTGCTACTGTGATGAAGTTTACACCCCCCAACCAACACACACACACTTGCCCAGACCACCGACAGAAAAAGGTAAACCACCATCCCTACAGAATAAACCTATCGCGATGGTCTAAGTGGTAGCGCACTGGACTATCGATCCGAGGCAGAAGATCGGAAGAG
Contig55512 11 reads, 266 bases	p2	(TG)8	16	133	148	CAGGCCATGGGATCAGGTTATAAACATGCAATAGAGTCTGAAAGACAATTATTGTGCAAACATCATTCAAATGAATTTCTGACAGTTATTAAATGTTTGAGCCTGTAGAAAGGTTGGATATGTGACATAATATGTGTGTGTGTGTGTGGTCCTCTGGCACACTGAAACCATCACATCCAGCCTGCCATCAGTGAAATGATAATTTATCACTAACTGTTAATCAACACAAACTGCAATGGTCATCCACTAATGTGATTTGGGATTAT
Contig55523 10 reads, 189 bases	p2	(CT)6	12	177	188	CGTACAAATGGTCTACTACTAATGGTCTACCTCGTTCCGGTAACTGTCCTTCATCTATAACATTTTTTCAAGTTAAGCGTTAGAGTGATTAGCTGAATTGTACATTCTTTAGCATACTTTTTTTTCTTCTGTTTTTTGTTATACAGAAGATGTTGGGTCCAAGCTAAACCAAAGACCTCTCTCTCTCTA
Contig55582 11 reads, 335 bases	p2	(AG)9	18	310	327	TAATAGTGAACTTTAATTGAAATTTCTAAGAGTACCATAGGTAGTGAACTATTTTAGCATTTATTTTTAAAAAATGTAATGTTTATTTCTTTTAAAGTTTAAATGAAGTTAAATATAAATAGTGTGAGACTAGCAATTTTATAGTATTTGGAGTCAGCTTTAATGAAATATTTACTTTGTATATTTTAATGTTTTATGTACAATACTGTGTAAAAGATATTTGGCTAGTTGTGTGCGTGCGTATGTGCGCGGGGTGGATAAAATAAAAAAAACCCATAAATAAATAGAAAATATACATGAGAGATAGATAGAGAGAGAGAGAGAGAGAAAGACAG
Contig55982 10 reads, 266 bases	p2	(TC)7	14	249	262	CGATCTGAAACTCATTGTCTTTCTTTCTTTTAGCCATCTTGTCCAAAAGGTTTATAAAATTAGTAAGCTTAGAACGCGATTAAAATTTACTTTCTGATCCGACGACAATCTCTTGCACGGACCCTTTTACACATGCACACATCGTCCGCTATTTTCAAAAGCAATATACACCAACCCCACTTGAACAATGTATTTTTGTCACTTTTCCACAGACATCACTGCGATCACTTTGATCCCGAATTCCAAAATCTCTCTCTCTCTCTTAA
Contig56115 11 reads, 211 bases	p2	(GA)7(GT)5	24	180	203	GTGTTCTTGTAGTGTTTTTTTTGCTTGTTTTCTGGTCATGTGTACCATTTCTCCCGCTGGTTTGAACAAAAAGGTTGCGTAGCGCCCGTTGTCTGGTTTGTGTAGGTCATTGTGTGATGTTTGGCGCCAGGGCTCTTCTTTTCTGATCTCAAGGCAATTCGACGGCAGAGAGCCTGTGTGAGAGAGAGAGAGAGTGTGTGTGTGCGTGTGT
Contig56234 11 reads, 265 bases	p2	(TG)7	14	179	192	GCTCTTCCGATCTTTTAGAGGGGTAAATACTACATTCACATGACTGGCCATGATTCTATTATCCAGGTCTAGATCAGATTCGCTTCCAAAGTTTCATAAAGGAGAGAATTCATTGAATATACTGACAAATTAAACAAAAATGCATTAATAGATTTATAAAAAAGATTGATGTGTTTTTTGTGTGTGTGTGTGTCAGAGCGATGTCTTGGTGTTTATTCAAACCCTTTTGACGTTATTCACTTAAATTTTAATAAGACAGATTGTG
Contig56408 11 reads, 102 bases	p2	(CA)6	12	5	16	CAACCACACACACACACTCAGCTGTGATATCACATGACCTACTACTTGATCTATATGTTATTCCATGCCTAAATCTGTTCTTCTTGGCAGTTAGCTGTTTTT
Contig5696 38 reads, 131 bases	p2	(TA)6	12	29	40	TGTTGATTCCATGCCAAGTTATCATAACTATATATATATACATAAAGGGAAGGCTGTATGTCTGTATGTCTCAATTGTTTTGATAGTCATTTCAAGCGCTGCTAAACAAGATTCAAATCGATCGCCTCTCC
Contig5947 609 reads, 454 bases	p2	(CA)8	16	222	237	TGAACCGCTCTTCGGGCCTGTGAAACTCAAGGTAACGGATTGGTATAGGTTGTCTGCAACTAGGCAAGGCAAGCATAAATATTACACAGCATAGGTCATCTGTCTCAACCAGATGACGTCTCTAAAGGCAGTCGGGCTTTCATAAGAGGTTACCAGTAGATCCAGGCAGATGTGCAGGTTGCCACCAGGTCAAGCAGTGGTCTACGCCTGAGGTTATCAAGCACACACACACACACACTCTCAACCTTCTAAATAACATGCAAACTCTCAGTGAAATCAGTCATGCTGAACTTACTCACTCAGTCATGCTGAACTTACTCACTCAGTCATGCTGAACTTACTCAGTCATGTAAACATTAAAACATAATGTAAAAACTAAAATTTGATTCACTTAAAAAA…
Contig6086 247 reads, 249 bases	p2	(TG)7	14	101	114	ATTTAATCATTTGTKTTTTTTTTTCAAAACTTGCAGATTTACTTTTCTTAAATGTTTAATATTGTTAACCCTGCATACAAGTACAAGTCAATAGCATTAATGTGTGTGTGTGTGTATGTGTTTAAACTTCACGGGACGCCGCGGTTCTCTCTTCAATCGGACTTTTCAAACGATAACCAGGTGACCATCACGCCTCAGAAGCCACGCACTGGTTGCTCACCTCCTTGCCATCCACGTACAAGTCAATAG
Contig6221 764 reads, 700 bases	p2	(GA)7	14	633	646	AAAAAAAATAGGGATAACAGGGTAATACATTCTCTCCTAATTCTCTGGCAGTCTCACTCGCAGATTATTACTGACGCTCAATAAAACATAAATTTCTTGCGTTATTCGGACAATCTGAGAACGCAACACACACACAATGTCTAACCAAGAACTTACAAGAGAGGAGCTTGATGATGTCCGCGAAGTTTTCGACCTCTTTGACTTCTGGGACGGTCGGGACGGTTTGATTGACGCCGTCAAAGTTGGCGACTTGTTGAGATGTGTGGAACTGAACCCAACCCTCGCTCTCATCAAGGGTTGGGGCGGCACCGATAAGCCAGGTGAAAAACAATACTCTTACGAAGAATTCCTAGCCATCTACAAACAGACAAAGAATGTCAAAGAATGGGGAACTTTTAG…
Contig6504 22 reads, 139 bases	p2	(TG)6aagtcgtctcctctctggattgtgtt(TG)6aagtcgtctcctctctggattgtgtt(TG)6	88	14	101	TCTGGATTGTGTTTGTGTGTGTGTGAAGTCGTCTCCTCTCTGGATTGTGTTTGTGTGTGTGTGAAGTCGTCTCCTCTCTGGATTGTGTTTGTGTGTGTGTGGCTTAATCGAAGCAGTCGTAGGCAWCGGAAGAGCGGTT
Contig6635 118 reads, 402 bases	p2	(TA)6	12	315	326	TGACACTGACATATGTTTTACATAGCTTTTGCTTAAAGGATCTTCTGAATAACTTGTGCATCATCTGATCTGATATCATTAACTTTGTATTATTATGGTGTGAAAATAAAGATGCACAGGAGATCTTAAAGTTTTATCGACTCACACTTGCCAACTCTCACTACCTACACACCATCATCACCATCACTTGCCCTATCACCATCACTTGCCCTATCACCATCACTTGCCCTATCACCATCACTTGCCCTATCACCATCACTTGCCCTATCACCATCACTTGCCCTATCACCATCCYTTGCCCTCTAACCATCACTTATATATATATAATTTGTTACTGTTTAAATTCTCTTAGAAATACATTTTTTTTATATCCATCAATTCAAATAAAGTACTCTAATA…
Contig6763 1136 reads, 600 bases	p2	(TG)6	12	103	114	GRGWARGTAGAATTCCAAGAAATGCTTTCTGACTGCACATTACCAGGAAGAAGATTACAATTCGAAACACTTCTTTAAGTGAACAATTTTTTTCGTCCTTTTTGTGTGTGTGTGGATACAGTAAATGTTACCTTTTGGTGTCACCCCCTGTGATGGTATCACCTTTGCGGTCCGCACCCCTCTAGTGATGCCTCTGATGGCGAGTGAGCTCAAATATGAACAGTGAGCCTGTCAGCCTACTGCGATCAAAATAGCGTTGCGATGATATGCCTAAGCCTAAACTAAAATCGCACAAAAGCGTTTGGTACTGAGTCTAACTCATGCGAAGTAGTAGCCGAGGACCAAGCCCCTGGCGGTAATCAAAATGCCAATCAAATAAACAAAACGTGACCGAGTCCG…
Contig6884 703 reads, 624 bases	p2	(TC)6	12	410	421	TTTTTTTTTTWTTCAGTAATCTTTGCTGCCGCCTGCCTGCAGTTTCCTCCACAACAACGTCGCCCTCAGCCTGCTAGGCAAACCGACTCCACGGACGAGCAGCGAACGCGGCCCAGGACGAGCAACGAGCATACGCGCGCCTAGTGCGGTCTGGCCTGCGACCGACTATTCAACGCGCCTCGCTGATGGTACAAGCTGCCTCCGGACGTTCGCGGGGACAGGAGTGTCGGTCCCATAAGCTTTAATCAAAGTTCGACGAGGTGGCCTTACGCAGCGGCGCCAGGAAGACGCACGCAAACGCAGGATTCGCACAGGTTTCCACATGCTGGACCCCGGCCCGTTGCGAGGGCTGGTCCCCGACGAGACGCTCGGTCGAGCTCTATCTACGACAGATTTGCT…
Contig6893 383 reads, 207 bases	p2	(TC)7	14	59	72	CTCACTATAGGCTAGGGATAACAGGGAAAAAAAAAAAAAAATAGGGATAACAGGGTAATCTCTCTCTCTCTCAGAAGATCACAGTCACAGACCACCATAAGATTGAGTTCTGAGGTGTTAGACTGTTCGATTAGAGGAGCCTAGCTGAGAAGTTTGTTCCCAGCTAGTATAGTAGGTCATAGCGGAGAATAGCAAGAGCGTCGTGTA
Contig6957 28 reads, 152 bases	p2	(TG)7	14	123	136	GACAACATCATCAGGGCTGCCCCACGTCAGCGTATGCCAGACCACAGACACCACTAATCATCAGGGCTGCCCCACGTCAGCGTATGCCAGACCACAGACACCACTAATCATCCATTATCACATGTGTGTGTGTGTGCGAGAAGAGCGTCGTG
Contig7155 145 reads, 524 bases	p2	(TG)7	14	501	514	AAATTATTGTGCGAATTTCCACAGCATCCATTTTTTGTGCAAATTTGACACCCCACAAACACATTTGACAGCCCACAAACACATTTGACAGCCCACAAACACATTTGACAGCCCACAAACACATTTGACAGCCCACAAACACATTTGACAGCCCACAAACACATTTGACAGCCCACAAACACATTTGACAGCCCACAAACACATTTGACAGCCCACAAACACATTTGACAGCCCACAAACACATTTGACAGCCCACAAACACAGATATGTTATTATTCTTATCAAAATTTGATGAGCGTTCATTCAAAACTGCTGCGCGGCGTCGGTCAGATAACTTAAAAGCAAGGGAACATCGATAGTTACATGAGTGCGAGGAAATCACGGCTCACGCTTTGGGAA…
Contig7307 1202 reads, 1485 bases	p2	(AC)5tcactctcgggggagagc(CCA)8	52	760	811	GGGTAMTACAGGATCCGCCATTAATGCTGCCTTGGAAGTTCCGAAACGAACCTTTCCTTGATTAAATACAATGTGTTTTCACAATTAAATAACAATTTATTCACCCCACAGAAGGATTGACAGGGTGTTATTTTGAACAATATGGTATTCAATATGAAGATTTGAACGGTAATCGTTGTGTCTGGGGTGAGAGGATTACGTCTACGTCTCTTCACAATCGTCATTCACATCTAAACAAAAGCAAATAATTTGAGATTGATCACTGCCGTTTCATATTATTTGTGACATATTCTTAATTAGACCTACTCCTGTGCAACATAATGAGAGACTGAATTTTGGAATGTGTAAAAGTGTTTAGGATTAAACAAAAATGGGAACAAGACACATACCAAGTGACAA…
Contig7423 703 reads, 736 bases	p2	(TC)6	12	655	666	AAAAAATAGGGATAACAGGGTAATGCTTATTACAACTTACCAAGAGATTCTCGTCGAAACATTTATTTGAATTCTTCCAATGGCTGGTGGCAAAGCAGGTAAAGATCATGGCAAATCAAAAGCCAAATCAGTTTCACGAAGTGCCCGTGCTGGTCTTCAATTTCCCGTGGGTCGTCTTCATCGTCATTTAAAATCACGTACCACATCACATGGTCGTGTTGGTGCAACAGCTGCTGTCTATACAGCTGCTATCTTGGAATATTTAACGGCTGAAGTTCTCGAACTTGCTGGCAATGCATCGAAAGATTTGAAAGTTAAACGTATTAACCCACGTCATTTACAATTGGCTATTCGTGGTGATGAAGAATTGGATACATTAATTAAAGCAACCATTGCTGG…
Contig7701 634 reads, 462 bases	p2	(TG)7	14	314	327	CCTGTTATCCCTATTTTTTTTTTTTTTTTGTGCGCAGGTCAGATCCGAACCTCAGTTCAAGCCAAGAGAGTGCCGCCCACACTGTCTGGACGTTTTACTGTGGTCACGACTATAGCTTTTAATGGCAAGGGAACACGACATGTGAGATGATTTCCAGAGAAACGAAATCAAACTCCAACCAGAACGGCAGCACACGAATTGAATCGCGCCCGCTGTTTCATATCTCGGGAGTCCCAGAAGTCTCTCGTGCCCGCCTCGTCAAATGTGATTCAAACCTTTTCCGGGTGGTCACCCTCGTTTGTCTGTGTGTATTTGTGTGTGTGTGTGTTTGTGTTTTATTTTTCTTTAAAAAAAAGAAACCCTTGCAACAATCGGTCCCCCTCGTTTCCCTCCTAGTCC…
Contig7901 1101 reads, 927 bases	p2	(GT)7	14	31	44	CTTTTWATCTTTCAGCCCACGTTAACTCCAGTGTGTGTGTGTGTGAGTGACGTGCTTAAAACCATTGGGTAGTTGTTCTGTGGGAGCTTCTCTACAGGATACGAGGGGATAGTCTAACTTGACCCAGGATAGGAACTGTCGGCTCATCAAACCATACTCCTAAGTTTACTCCTAAACCTGAAAAGCAAAATAAAATAGTTCTACCAAGTCATTACATAAAAAATAATAAAGGACAGAAACAGAAGCAGAACGTGACAGACAACAACAAGACAAAATAGGAAACAATAATACAGCAAGAACAGCACATAAACTGGAAGCACTGTCACAGGACAGGTAAAAACAGCACTGAACAGGAAACAACATTGTAAGACTGAGAGAACAGAGTGTGACAGGGAGCAA…
Contig8070 1140 reads, 821 bases	p2	(TG)7	14	89	102	ATACAGATCCTGACGTTTGTCATATATTGAATTTGAGGAAGAAATCTTCTAAGGAATAATCAGTTTGATGACACTTTAAGAAGAACATTGTGTGTGTGTGTGTACTTTATAATACGTTATTCAAGTGAATGGTGGTCGGTTGCCTTGTTAATTAGGTACTTCAAAGAAAGGACAGCACACTGAGACTTATACCGTCACAAGTTATCGTGCCTGAGTTAACGTCATTATGAGAAACTCACAACACATTGCAGTTATTCTCTTGTTGACCATGGTGGCAGCAGTGTCGCCATTCTTTGCGCCCCCCACGTATTGTGAATCTGACCCGGAACTGCAGCGGATGTTACTTTTCTCGTGTTTCTTGGAGCAAGGTTTTTCCCACGTCGAGAGTATGTCACTGTT…
Contig8359 108 reads, 450 bases	p2	(TG)7cacaacagtaacatgtcagggtt(TG)7cacaacagtaacatgtcagggtt(TG)7cacaacagtaacatgtcagggtt(TG)5	121	25	145	TAGGGATAACAGGGTAATCAGGGTTGTGTGTGTGTGTGCACAACAGTAACATGTCAGGGTTTGTGTGTGTGTGTGCACAACAGTAACATGTCAGGGTTTGTGTGTGTGTGTGCACAACAGTAACATGTCAGGGTTTGTGTGTGTGCACAACTGTAACATGTCAGTGTGTGTGCTTGTGTAATGTTTAAAACTATCATTATGTTGTGGACCTTGCAAGTCTCTTATTTCAAAATACTTTTTATCTGCTAAATCTCATCAAAATTTAGTACAGACACACGGGTTACTTTAAGAAAACACATCTCCTCAGACTTGTCCCCTGTGGTCTAGTGAGGCTGTGTGGAGATGGGGGATAGAGACACAAGTGTGTTGTATAAACACAAGTGCTATAAGTACCAACAG…
Contig8568 210 reads, 710 bases	p2	(AG)6	12	208	219	TACACGACGCTCTTCCGTGCTTTGCCACTCAGACCACCATGGTCATAATCTTGAAACCTTTGATTTTGTTAACACTTATTCTTATGCATTACCCTTTTAGTGTTAGTACATAATTGTTAATAAAAAGGTTAATTTGCTACTTCTAGGATAATGTTCCTCAATCATCTTCCACCTATACATTCACCAGCATTCAAGCATTTTTACGATAGAGAGAGAGAGATAAGTCAAAACCTTTATGTCCTTATTGGAAGAATGAAAGAATGAAATCATCTGTTAACATGTAATTTAAAACAATTGTATTATGGGATTGAGGACAAAATATGTGTTTTCTCTCGTCTGATGACGTTCTGTTACATATAAACTAAAATATATCATAACAGTTTAATCTGAGGTTGCTAT…
Contig8650 148 reads, 587 bases	p2	(TG)6	12	451	462	CCCCCAGCAGGACCCACCGTGCACGAAGAAGAGCAGATACTAAAAAAAAACACTGTGAGATTCTGTAACGCAAAGCTGTATGCCCGTGTTGTCTTTTGTTTTATGAATGACCTNTATGCCGAAAACACTGTTTTCATCTGCTATGACTTTTTTTATTTTAAAATCTAATATCGTTTCTGAGCTTAAAGAAATATTGTTTCACATATACTCAACCAAATGATGTTCAATACCACAAGATGGCACTTGTTAGAATAAGAAGTTTCAAATTCTGAAGGATTCAGTAGAGTGCTGACAACCGTTCAAGTTTTTCCCCCTATATCAAAAGATGCAGTAACACTCAAACCTCTTTCTTGTGCTAATGTTCAAAATTTCAAGGATACAGCCAGCGTTACGTGGAGC…
Contig8697 784 reads, 1060 bases	p2	(AT)6	12	9	20	TTAAATAAATATATATATATACAAAATGAATGGGGTATAAAATATGTAAAATGTACACAATAATAATTCAGGTACAAAATATCTAAAATAAAGGTACGTTCACAATTGGATACTACATCCCTTGATTCGGCTCAGCTCCGCTATATATCTGCCGACCTCACACACTGTCTCAGGTAACGGGATCAGTCAGTGTTCCGCCTCACTGGTCAGCGATGCTTAACCCACACATCGTCTGATAGGCCGATCAACACCACGCCCCTCAGTTACTCAATGACTGACAGCTGGCTCCAATGTTACTAACAGTATCTTCTCGTCCGGCTCAGGGTCGTCTTCCCACTTTTGCCTAGCACGTCTGGTACTCAGCTCTAGGTTAGCTTGCCTAACCGCTATTCTCCGCTA…
Contig8697 784 reads, 1060 bases	p2	(GA)6	12	623	634	TTAAATAAATATATATATATACAAAATGAATGGGGTATAAAATATGTAAAATGTACACAATAATAATTCAGGTACAAAATATCTAAAATAAAGGTACGTTCACAATTGGATACTACATCCCTTGATTCGGCTCAGCTCCGCTATATATCTGCCGACCTCACACACTGTCTCAGGTAACGGGATCAGTCAGTGTTCCGCCTCACTGGTCAGCGATGCTTAACCCACACATCGTCTGATAGGCCGATCAACACCACGCCCCTCAGTTACTCAATGACTGACAGCTGGCTCCAATGTTACTAACAGTATCTTCTCGTCCGGCTCAGGGTCGTCTTCCCACTTTTGCCTAGCACGTCTGGTACTCAGCTCTAGGTTAGCTTGCCTAACCGCTATTCTCCGCTA…
Contig8757 326 reads, 617 bases	p2	(TC)5tatttctttgtgttatgggggaaaaa(GC)6	48	100	147	TACACTCTTTCCCTACACGACGCTCTTCCGCGCAGCGATAAGCGAAAAAATGGAGAAAATTTTGTGTTGAGAATGCTGATACGACAATGACGATTGTTTTCTCTCTCTCTATTTCTTTGTGTTATGGGGGAAAAAGCGCGCGCGCGCATATACACGTTTACGTGCAACAAAAATTTGAACACAACAACAACGACGATGACGAAGACGACGATAGTCCGTGAAGGAAAAAATGTGTTATGAGTTCATGAGAAGGAGATTTCATGTCGAAATCTGTCGTCGAACAAAACCAATTGATAACAGACAGATAACAAGAAGAAAAATGGCTTGTTGAAGGTTTTGAAGACTTGGACTGCCACCGAAAGCTCTCACATCTTGATCGTAGGCATATTTAAAGAAAGC…
Contig8786 21 reads, 236 bases	p2	(TG)5cgtgctcgcgtcttatcattttaaataatgtgtaaaggagcgtgcatgtatgtggtatgtatgtgtttggct(TG)5cgtgctcgcgtgcgtgtgta(TG)9ctcgcgtgc(GT)9	157	62	218	TACACTCTTTCCCTACACGACGCTCTTCCGATCTATGTWTGTGGTATGTATGTGTTTGGCTTGTGTGTGTGCGTGCTCGCGTCTTATCATTTTAAATAATGTGTAAAGGAGCGTGCATGTATGTGGTATGTATGTGTTTGGCTTGTGTGTGTGCGTGCTCGCGTGCGTGTGTATGTGTGTGTGTGTGTGTGCTCGCGTGCGTGTGTGTGTGTGTGTGTGGGTGGGTGGGTGTGTTT
Contig8957 385 reads, 729 bases	p2	(TG)11	22	596	617	GTTTGTTATAGATTCGTAGCTTTTTAAATAGTCTTAATTTTTTTATTATACTTTTTTTCTTCTTCTGTTGTCAATACGTGCAACTCAAACTGTACACAACTCAGTTCTTACCATCTTACCATCACCACATGTACAGCCAATATTAGCCATAAGACATATTTCATTTGATGACATTTTGACATTTATTTATCACTCAAGTCTTCATTATGGCGTCTGAAAGCGAAAGCAAACAATGGAGCCGTTCATTGACGGAGTAGAACGTGGAATTGATTTCAGAAGCAGCGCGTAGAGCGGAAAGCGAATTCATAAGCAATGATGAAAGATAAACTTGATAGATAATGTGGCAGAGGCAATACAGACTCCACACTAACATGGCTGAAAGACAGCAACAACACCACC…
Contig9120 28 reads, 196 bases	p2	(CT)8	16	53	68	CGCTCTTCCGATCTCACTGCTACATCTATGTAAACATTTAAGTGTBTCCTCCCTCTCTCTCTCTCTCTATCTAAACTTAGAAAATAAAGTTGAATGTTGTATTGCTTGCTTGTCATCTTATTTTTGAAGTGCAGTTTTGATTTTTTAAGTAACTTCCTGATGATAACGATGGTTGCATTACCCTGACTTAAAAAAA
Contig9252 451 reads, 561 bases	p2	(AG)5aagggaaacattgcttcggttcagtggctgattcattctcatggacgtgctgtccttctctacacacaccagccgcgagtcacttatca(CAC)5	114	245	358	GTTTGCCGCGCCTTTGGCAATTTTTTTTTTGTTTTGCCCTTGACAAATGGATATAAAAATCCAAAAGATAGGAAAATACTAAATTTTAATAAATCAAAGGATTAGTCCTCGGCGCCCTTGGCAACTGCCCCGATGCCAAGTCGTTGTTACGCCTCAGCATGACGCCCCGCTGTTAAAAAACGTTGGCTGACGTGCGAAGGCGCCGATAACGTTTGTAGCAGTCGCGGATGATGTCAGGGTCACCAGAGAGAGAGAAGGGAAACATTGCTTCGGTTCAGTGGCTGATTCATTCTCATGGACGTGCTGTCCTTCTCTACACACACCAGCCGCGAGTCACTTATCACACCACCACCACCACCGTATTGTTTACGAGAGACCAACAAATGTAGAAAGATTTGT…
Contig9341 557 reads, 720 bases	p2	(CT)8	16	213	228	TTCATTATGAGATTCTCAGTTTATTAGTTTATTACATGTATGTAGGTTTACATCCTTCCCCCTATGGACATCTCTGCTGTTAGCTCAAATTAAGTATTTTAAAAAACAAAACGCTTGTCATGACCAAGATAACAGTCTCACATAGCCACAAGTACAGCAGACTTTCCTTATCTAGTCTTAGCCTGATAGACATGACTCAAATATCACCTGCCCTCTCTCTCTCTCTCTGTGCTCACATTGTTATTATGCTGGCAGGGGAAGGGTTCAAGTCTCAGCTCAAGATCTCAAAGTTTGCTGTTCTAACAAAACTGAAATAATAATGATGGTGGCTAACTCATATGAGAAAATGCATATTGATGAAGCAGGATGGTGGCTAGTGTTACAAAGGTTAAAAATAAG…
Contig9389 630 reads, 906 bases	p2	(AC)6	12	415	426	CCCTACACTGAGAGCTAGCAACCAAAATCAAACAAAGGCACAAGGGATGAGAGAAAGTGTATTGGCTTTATTGTCAAATAAAACCTAAAAACATCTATTGAATTTCAGGCACACTTCAATGCTGGAGATATAAAATGACAAACTTCATGAAGAGTGGAATTCATATTTTACAAACTTCTAATATTTCAAAGAATAACCTTGACATTTCATTAGGCTCTACAAAGGGGTTAACCCTGGCTGCTTGTCACTTTATGAAGGTTCACAGTATCTTAGTTTTCTCTCAGCCCTAGTCCTTTAAATGATACAACTCTTTTGTTGGAGAAAATAGTCTTTTAAAAAAGTTTACTAAAGGCTGTTGATAGAGTGATGTCAACTCAATACAGCTTGACTTAAATCTAC…
Contig9629 685 reads, 991 bases	p2	(CT)12ttctgtcacatcttgttgaaggttagtcactcaaccctcacacacgcg(CA)5	82	76	157	GTTTGACTTAAACTGTGAGATTCATATAGAGCAGCGTCAAATGAATGCATGTACATTATCTATCTCTATTTCTCWCTCTCTCTCTCTCTCTCTCTCTCTTTCTGTCACATCTTGTTGAAGGTTAGTCACTCAACCCTCACACACGCGCACACACACACCTTCTCACACCAACATATACATACACACAAAAATACTCTCATACACCTTCTCACACCCACACGGTGACGGATGATCCCAGGATTATCTCATAGTGTTGAATCCCCCGAAGGCGATCTCTCCCCGCCTGACCGCGGTAGCCAGTGCCCCGACAGATGACCACTGGAAGACGTAGGCCAACAACGCCAGGTACCAGCTGTAACTCATGGACACAAGGTAGTCGATGTCATAGTTGATCTTGAA…
Contig9676 1127 reads, 1221 bases	p2	(AC)6g(CA)7	27	1128	1154	GGGTAATGCAACAAACAGACGCTTACAAACAAGGCACAACACTAAAAAACAACAACAAAAGAACTAAACACAAAAGACAAAATGCTGGCCACCGTCTTCACTTTGACAGCTCTTATTGCTGTTTCCGTCAACAGTTGCATCATAACATCATACAAACGGTATGGGGAGAGATGCTCCTGCAAAGAGGCCTGCCTAGATGGCGCTCAGTGCCTGGGAGACAACATTGGCGGGCTCAACTGCTCGTGCCTGCCGTGTCAGTATTACGATAATGTTCTCCGCCAGTGCGTCAACACCCCTGATTACGGTGATGTGTGCTACGGTGTCTGCTCTTCCAACTACACCTGTTTGAACTCTACCAATGAAGTTAGAACCTGTCAGTGCCTGAGCAACCAGACTTAC…
Contig9697 110 reads, 176 bases	p2	(CA)5aaaataggctaaagttgaacctaatagtggcattgttatattatcattagagcat(CA)5	75	47	121	TAAAGTTGAACCTAATAGTGGCATTGTTATATTATCATTAGAGCATCACACACACAAAAATAGGCTAAAGTTGAACCTAATAGTGGCATTGTTATATTATCATTAGAGCATCACACACACAAAAATAGGCTAAAGTTGAACCTAATAGTGGCATTGTTATATTATCAGAGCGGTTC
Contig973 4031 reads, 682 bases	p2	(GT)10	20	69	88	AGATCTACACTCTTTCCCTACACGACGCTCTTCCGATCTCTCCGGCATGATTGTGAGTGTAAGTTTTAGTGTGTGTGTGTGTGTGTGTTTGTGTGTTTGTGTCTGTGTGTGTTAATATGTCTGTGTGATATAATACAGTACATTGATATATGTTTAAAAATACATATGGACAATTTTTAAATATAAAAATAAAGTAATGACAACAATGTATAATCTAGAATTTCCACTGGTATATTTGATATTAAGGAGATAATAATTGTTGTAGGTTTCCACATGAAATCTTCAGAGTTCAGACAGGAACACATTTGTTGTTGAGATCGTCACATTGGTAATTAGCAGGGCAGACGAATTTAGTGGCGCCCGCCATGTACGTGTAGTAACAGGTGTCACCAGGCTTGA…
Contig9920 479 reads, 504 bases	p2	(AT)6	12	33	44	GTTAAATGTTCCGTAGCAGATTTTACTTCCAGATATATATATATTATATTTTCTGTCTTAACATGTTATGGTTCAAAATTATTTACATGCATAAGTTTTTAAAAGTTTGTAAGATCAGCTTTGTACTGTTTAGGACGAGAACTATTAATGAGCGTAAAGACCCTCCCCTCCGTTAGTAGCAGATGATGTGTATTGCTTGTGTCCAATGTATATAACAGATTGTACTGAAGAGATGGGCACAATTAAGCCAGCCAGCCCCTAGCAACTTTAGCAAGCTCGAGATATATTCGTGAGCTCCAGTCCCCACCACCAGCTTATGTATTAATGTCATGTTTGTCTGTGTGAGTAAGGGACTATTTACAGGCTGGTATCATCACCGTGTTATCATCACGATTGCCT…
Contig9961 122 reads, 669 bases	p2	(CA)6aac(AT)5	25	593	617	GGGATATTTTATTGATTACAAAACAGTGTATCATTTAAAAAAAAAAAATTAAAGTAAAACATTCCAGAAAACTTTTCTCACATACTATTAGCAGACAATGTTCAATAATGAAGAGTTTTTCAATCATCCAATGAGAAAGTGAGTTATTTATAGATGTACACAGTTATAACTTTCATTCACCATATTGCTACAAGCAACTGAGAAGTCAAATAATGTATGGACGGAATAATGGACATACGGTATCACCTTGCCTACCGTATCAACTTGCCTACGGTATCACCTTGCCTACCGTATCAACTTTCCTACCGTATTAACTTGCCTACCGTATCAACTTGCCTACCGTATCAACTTGCCTACCGTATCAACTTTCCTACCGTATTAACTTGCCTACCGTATCAA…

## Sheet: tri-rep
ID	SSR type	SSR	size	start	end	sequence
Contig307 965 reads, 239 bases	p3	(CAA)7cccctgagccaacaacaagccctgagccaacaacaagccctgagc(CAA)9cacccctgagc(CAA)11ct(ACA)11	172	41	212	AAAAAAAAAAATAGGGATGAGCCAACAACAAGCCCTGAGCCAACAACAACAACAACAACAACCCCTGAGCCAACAACAAGCCCTGAGCCAACAACAAGCCCTGAGCCAACAACAACAACAACAACAACAACAACACCCCTGAGCCAACAACAACAACAACAACAACAACAACAACAACTACAACAACAACAACAACAACAACAACAACAACAAAGTTTCGAAACCTGTTGGAGGAGGAG
Contig689 160 reads, 191 bases	p3	(CAA)13cccctgagc(CAA)9	75	15	89	ATACGCTCACCTTTCAACAACAACAACAACAACAACAACAACAACAACAACAACCCCTGAGCCAACAACAACAACAACAACAACAACAAGCCCTGAGCCAACAACAACCACAACAACTCCAACAACCGACAATCCGTTCCTTTTGGAGATTTATGTTTAAAAAAAATACTCTGAAAACTGCCACACAATTT
Contig10160 424 reads, 375 bases	p3	(ATC)7	21	25	45	TGTTACTTAGCTCTGAAGCTAAGTATCATCATCATCATCATCATCATTTGTCCTTTGAGTTCCTTGTGGAACATAGGGCCTCTGTCAAAGCTCGCCACTCTACACGGTCCCTTGCCAGTCGCTTCAGTTCTTCCCAGCTCTTCCCAGTCCTTCCAGCCTCGTCCAACATGCTCCGTCTCCATGTACGCTTGGGTCTTCCTCGTTGTCGTTTGCCCTGGGGGTTCCAATCTAAGGCCTGCCTAGCCCTGCTGTTATCTTTCCTGAGGGTGTGTCCAATCCATCTCCACTTTCTTTCCATGATTTGTTGTTCTACTGTTCTTTGTCCACACSWMTTTCGTATCTACGTTTTTGTTGACGTGTTGGCTAGGTTTTTCC
Contig1024 4534 reads, 1232 bases	p3	(ATG)6	18	405	422	GCGCGGGGCCCACACAAGTAAACACGGCGATCGACTTCCAGGCACTGAACCCTGCACCGACCCCGGCCCCAGCGCTGGACTTGACAGCCCCAGCACAACTCAGTACAGGTGTCAACTCGGTACCACAGTTATCAGGAGGAAACATCTTCCCTCCAAATATATTCGCAGGGCTCCTTCCGCCGACCACACCGAAGCCCTTTGAACCATTCGCTCAGTCCAACATGGGCAATCTACTACCTCCAAATTCAATAGCACCAAAGCCCTCCTCCCCTGTTGACCTTTTGAACTCTCTAAGCTTCCCAGCGTCTGGAACACCCGGTGGAATTCCCCCTCCTTCTTCAGGAATCTTGGACACACAGTACCAACAGCAACAACAACGGCAACGCCAGCAGGGTATGA…
Contig10749 801 reads, 893 bases	p3	(GAT)8	24	212	235	CGCTCTTCCGAKCWGTCTGCCTCTCTTTCCACAAAATAAGGGGTCCGTGATTTGGCTTGTACTGAACACCAACACCATTTGCAGTTCTGAAGATAAAAACTGTACCGAAGGAATTATCCACGAGATAGAAGAATCTAACAGACAGTTGGATAAAAATGATGTATCAAAAGATATCAGTAATGATCCTGAAGAAAATTCCCAGCAGGAAAAAGATGATGATGATGATGATGATGATGGTTGGATTACACCTGCAAATATAACTGAGGTGAAGAGGTCAATGGGCGTAGAAACAGCCGTGGAAGAAAATATCTGTGTTGGATGTTTGACCACAGATTTTGCTATGCAGAATGTGTTGATCCAGATGGGATTGAATATCCTCTCTGTTGATGGTATGCTGAT…
Contig11160 287 reads, 876 bases	p3	(TTG)5(CTG)5	30	205	234	GGTTATTTCAACTTTCAATTTCAAGAAAAGTTAGGTTTTGTTTTCTCACGATTAAAGCGTTCATTATTCGATCTTTTGTCAGCAACCTTACATATTGGTGTCGTTGTCCTGGAAAGGTTGCACTTTCTGTGGGGAGGGCACAGATCGAGAGTTGGACATCGGGATACCAGTCTGACCAGAAAGACTTGACCCTCTAGGGTAACCTTGTTGTTGTTGTTGCTGCTGCTGCTGCTGTAGAGCAGACTGTCCATTCATGTGATTCGGCTGTATATGAGACTGGATTCCTCCTTGCATGGGTCGCATCTGTCCCATCGGCTGAGACTGCTGGCTCATCATCTGTCCTTGCTGCTGGACATGCACTTTTGCTCGAGGTTGTTGCATTTGTTGGTGGTGTTGTTG…
Contig11194 354 reads, 405 bases	p3	(CTT)7	21	82	102	TCAACACATATTTACTTTTTAAAAAATACTATCAAATCGTAAATCGGGCTATATTTACAACAAAAAATATTTCTCATTTGACTTCTTCTTCTTCTTCTTCTTCGTTCTCAATTTGAGTATTGCGTGCCGACGAGTTTTGCGCCAATTGGCCCGTGGTCTCCGACTTCAGCCTGCTGTTTTTTCTGGATGTGCTTCCATAGCCTTTGGTCAGCCAAGACCATCTGCAAGGCAGCAGTTGATTTTGGCAAGTGATGCAGCGTTCACATGCCACGGCTATAAGGGTTCCACGCATTACCCAGCCGCCTTTTATTTCCTTAACTAGTGTTAGGTACCCACTCGAAGCTGGGTGGACTCAACGACTTCCTAGGCCCCGGGAACAAATCCTTGGCTTCCCATGGA…
Contig113 15196 reads, 1816 bases	p3	(TGG)5	15	223	237	GTTGACGTGGCCCCGGTACAAGAAAGTGATATATACAAGGAAGACAGAGATAAGGTAWTGTTTTTACTCCAGACACCGCGGAGACACCACTAGCCAAAAGAGCTAGACTTCAAGGTTTGTCCAAGGCCTGTCGCAATTCGTTCGGAGCTGATTTGTTTGTGGCCGAGCAGCTAGCCGGAGTCTCACTAGACATGATGTGGCGGACGTTGATTTTTGCTGTCATGGTGGTGGTGGTGGAGATGAAAACCTTAGAACCAGAAGAGCAAATAGAAAAACGTGCTGTTGTATGTTATGACAATTATGGATGTTTTGCCTCAGAAGGACCTTTTGGTACCAGTGCTGAAAGGCCCTTTGTTCTGACTCCACAATCACCTGACAAAGTCGGCGTGGTGTACAAAC…
Contig1137 14 reads, 120 bases	p3	(CAA)9	27	51	77	GGATAACAGGGTAATAAAAACAAGCCCTGAGCCAACAACAAGCCCTGAGCCAACAACAACAACAACAACAACAACAACCCCTGAGCCAACAACAACCCCTGAGCCAACAACAACCACAAC
Contig11803 410 reads, 909 bases	p3	(TTA)7	21	868	888	ATAAGTCGGTCCAGGAATGTTATTGTCTAGAATGTTATGATATGAGGCAACCCGTTCATGCCGAATTTTCAAAATGGGTGCCTCAGGATACCAATGTCAAGTTAACGCAGTTCACCAGTGAACAGGACGTGTGTCGGGTCCTACAGAACAAGACCATCTACTTCATTGGTGACTCATTCGTGCGTCAGCTGTATATATCAGCGCTGGCCTTGTTACGCGACAATCAACCTAGAGACGTCATCAGGAATAATGTACCGCTAGTTAACGTGACTAACTGTGACAAGTATTTCCGTTATCTCTCTCCCTGTGGGTATTTCCTGATCTTAGATTCACTGGAATGCAACGGAACAACGAAGCTGGCCATGAGACATTTATACCGTGTCACGGAGTCTGATCGTT…
Contig12855 44 reads, 539 bases	p3	(TCA)9	27	431	457	CAGTTCCMGAAGTTGCATGCATCGGTTCGCTAAAGACGAAACATTATCTTATATATTACTGACACTCTGTCAATACGGAAGATTATTGCGTCCTACACTTATCCATGATTTGTTTCTTGCATATTTGAATTTTGATTAGAGTTTTACAGTTATTCTCAGCCCATGTACACTAGACCTTGCTCGACATTTTCCGCCGCTTCGAGTAATTCCAAAATAGCATACTTGCATTATGCTGGTTATTTCAAGTTCATCGAACCTCGGCCAAAGGTGTGAAACAGCCGGCCTCTATTCGGGAACAGGGTGATCTTCAAGTATTGACAGTAACAGGAATTGAAATGAATAAAATTTTTTAGATATGGATATATGTGCGTTTAACTGTTAAGCTGAAGAATGTGTCTA…
Contig1313 109 reads, 219 bases	p3	(AAC)6ccctaagc(CAA)5ctac(CAA)7cccctgagc(CAA)8cccctgagccaacaacaacc(ACA)5	134	22	155	CTCACATCTGGGCCACAGTAMAACAACAACAACAACAACCCCTAAGCCAACAACAACAACAACTACCAACAACAACAACAACAACAACCCCTGAGCCAACAACAACAACAACAACAACAACCCCTGAGCCAACAACAACCACAACAACAACAACAACTGACAATGGGTTCCTTTATGAGAGTGATTATTAAAAAAAATTCTCTGAAAACTGCCACACAG
Contig13308 113 reads, 615 bases	p3	(ACC)5acgcctgctgggatcaaatttcaaccagtgatcgagtgaatccttcccttacc(AT)6	80	93	172	ATGCATGCCCACGCATGAGATTTCTCAAGCCTGGATAGATAAAGTTTTCCCCGCCATTTCCCCCGATGTCTGCTACCACCCGGAAGTCGAAGACCACCACCACCACCACGCCTGCTGGGATCAAATTTCAACCAGTGATCGAGTGAATCCTTCCCTTACCATATATATATATTTTTAATATAGCGTACTAGATTTACGATAGTTTTATAGGACAGAAACTGAATACATGTAAAAACCCAATACCGATAGTTAAACAGACCCTTATCTGAGATTGTTAAAGAACATCAACCTGACAGACTTATGCTAATTACTCCCCTTGAGGTGTCGTTGAATAATGTTTTGTGAAAACCTGACAAACGTCATGTACAAACCTGACAAACGTCATGTACAAACCTGACA…
Contig13449 106 reads, 302 bases	p3	(ATA)9	27	251	277	AAAATCTAATAATTTAATTACGGTACATTCGATCGATTTGAAATTTTGATACAATGCATTGTCATCCAAAATCTATCTGTGGTCAAATTTTGAGCTCTCTAGGACCATCAGAAGTGGTTTAATTTTACGTTGGCAAATTTGAAAAATTGCCGACAGACACGAACGCAAGTTAACAAAAACGTGGTAATAAAGATTGTGGTTGTAAATTACCTATACATATGGCGGCCCCTGGGCATTGTAACGGATTTTTATAATAATAATAATAATAATAATAATAGCCCCTTTTCATGTTCGGAGATCGG
Contig13681 14 reads, 213 bases	p3	(ACA)6	18	73	90	AAGGGATGTGGACAACAACAACAAAGCAACAACAACATGAAGGACATTGTCGTCGCAGGGCAAGGGATGTGGACAACAACAACAACAACAAAAACAATAACAGCCACAACAACAGCAACAACAACAGCAACAAAAACAAAACAACAACAACAAAACAAAAAACAACAACAACAGCAAAACAACAACAACAAAACAACAACAGCAACAACAACA
Contig13880 16 reads, 254 bases	p3	(ACA)6	18	152	169	CTTTATCTATTACTAAAATGAAATGTAACAAAGCCCGCCCAAGGACGGGAATAAGTGTAGGGTGACCTGTGAAGTTCATGGACGCTATGTTTTGGTAGTTGTTATGCTGAAGCGTTTGCAGGACATTGTCGTCGCAGGACAAGGGATGTGGACAACAACAACAACAACAAAAACAATAACAGCCACAACAACAGCAACAACAACAAGTCAACGATTTCCCATGCTAGATTAATTCTTCCTCTTCTTCCTGAATC
Contig13936 258 reads, 702 bases	p3	(GGT)6	18	322	339	TTACAACTTACCAAGAGCTTACTATTAGATTCATCTTTTCATCTAACTTCGAATATGCCTCGTGCAGCTGCTGGTACATCGAAGAAAGCAACCAAAGATCCCAATGCGCCTAAACGACCATTGTCCGCTTTCTTTCTCTTCTCACAAGATGAACGACCTGATATTAAAAAGAAGAATCCATCGTTGTCGGTAGGAGATATCTCCAAAGAAATTGGTGCACGATGGAAGAAAGTCAGTGATGATGTGAAAAAACGTTATGATCAAAAGGCCGCGGCTGAAAAACAAAAGTATGAACAACGTGTGGCTGAATACAAACGAAGCGGTGGTGGTGGTGGTGGTTCACCAGCGAAAGGTAAAGCACCTGCTAGAGCCGCACCAAGCAAGAAAGCTTCACCAAAG…
Contig141 13341 reads, 569 bases	p3	(ATT)5	15	551	565	GCATTTMAAAAAAAAAAAAAAAAAATAGGGATAACAGGGTAATTCTTGTCAATCAGCTAACCAACACACTGACCATGTACAAGATTCTCATCTGCTGTCTAGCCATCTTTGCCAGCACTCACGCGCTGGTCGGCAAAGTTTGTACGACAGAGAAGGAATGTGATGAAGGCGAATGTTGTCAAATTCTCAGCGAGTTCCTCATCATGAGCAAGAGACAAATAGCAATACTACCTACATCTACCCCTAAGACAGGTACCTGCCAGAAGTACAAACTCGAGGGCGACTCGTGTAGCGTGTTTGAGCGGATGAACGGCCACTGCAGCTGTGAGCCAGGCACCACGTGCCACACCTACGAGGTCCCCCTCCCCACGGCCAATGGGGCCAGGTCGATGGTGATGC…
Contig14125 12 reads, 284 bases	p3	(TCA)7tcgtcatcatcttcatymtcatcaacatcatca(TCT)5(TCA)8	93	189	281	CTGCACTGGTGGTAGTTGAAGGTGTTGGTTTAGCTGAAGGATTGAGAAGAGGATTGCCTCGAAGAATGTTTTCCATGCGAATTTTTTCTTCTTCAACTCGTTTTTGTTCTTCAACTCGAGCGGTTTCAGCTGCACGTTCGCGTTTTATACGAGCTAATTCCGCCATGAGTTCAGCAGTATCATCTTCTTCATCATCATCATCATCATCATCGTCATCATCTTCATYMTCATCAACATCATCATCTTCTTCTTCTTCTTCATCATCATCATCATCATCATCATCT
Contig14321 278 reads, 330 bases	p3	(TTC)6	18	69	86	TTTTTTTGWWKTTTTAAATATTTAGGTATTTTTATTGTCATGATTTAGAAGAGACCACCGAAACCCATTTCTTCTTCTTCTTCTTCTGGTTCTGGCTTCTTTTCTTCAACAGCAGCAGCAGTAGTAGCAGCAGCGACTGGAGCAGAGGAGGCAGCACCACCAGTTGGGACGGAAGCCAACTTTTCCTTACCTGAGGCAATAACGTCGAAAACGTTCTTACCAGACAATTCCTTCAAGAGTTTATCAACTTGTTCACCGTCGACTTCAGCACCAACGGAGCTCAAAATCTTTTCAATATCCTTCTTGGCTGGTTGTTCGTTACCACCTAAG
Contig15575 25 reads, 349 bases	p3	(CAA)8(CGA)6caacaacaacaacgacg(ACA)5	74	211	284	AGGCATTTGTCCCCCCTGCCTCCTCCCCTTGCTACTTCACTGAGTGTATAGTGTATTGTATTTTTTTTAAATTGCAAAAAAAATTTCCTCTTAATTTCAAATAGCAAAAATTTGAAACCAGGCACATGGCTTAGTTTGAACAAATAAAATTATTTTAAAAAATTGATTTACATATATGTTGATTGGATTGGCCCAAATAGTAGATTCACCCAACAACAACAACAACAACAACAACGACGACGACGACGACGACAACAACAACAACGACGACAACAACAACAACAGAAGACAACTATATGTATTTAAATTTGATATACATGTATCTATCTANTTAAGGACTACATATTCT
Contig1594 479 reads, 264 bases	p3	(GTT)7	21	199	219	ATCTTTCCCTATTTTTTTTTTTTTTGTAACTAAAATTCGTTTATTTCGAAAAATAAATTATTTTCAGACCGAAACAGATGCTGTAAATCAAAGGGAATGTACTTCATTTCTTTGCTGGGAAACACCTCTATTGTATGCAATGTGGTGCCGTTACCTCCCTTGAGTTCCTCGTTGAGCTTAATAAGGTCCAGATTTATAGTTGTTGTTGTTGTTGTTGTTGTAGTTGTTGTTGGTGTTGGCCTGGTAACCTCCGTAYGTGCCGTA
Contig16073 31 reads, 142 bases	p3	(TTC)7	21	12	32	CCGAAACCCATTTCTTCTTCTTCTTCTTCTTCTTGCTTTTCTTCAACAACAGCAGCAGTAGTAGCAGCAGCAACTGGAGCAGATGAAGCAACACCACCACCAACAGCAGTCAATTTGGAGATCAAACCTTCAATCATGGCTG
Contig17397 172 reads, 447 bases	p3	(CAA)6	18	428	445	AATAGGGATAACAGGGTAATGCTTATTACAACTTACCAAGAGACTAGTGAGTGTGCGCGTGTGAACTCAACACTCGACAATGGTCAATCCGATCGGCGCTGCACTCGGTCCAGTAGGCGGCCTTGCAGCGTGTGCCTGCTGCTTGATTATCGCTGCTATTTGGGGTCTGTTCGCGACGATGATCGCGCTGGCCGTCTATACAAAAGACTGGGCCAATGCCATCAAACGGGCCAACAACATAAGTGGTGCTGGGGATGTACACATGTTCTTTAGTCACGCGCTGCTTCTTGCCATTCTCTGCGTCTACGGCTATCTCGGGCTCCGACGGGGGCTCCGGTCGGCCAACTAGATCTTCTCCGACCACCATTCTCCCCTCCTCTCATTGTCAACAAGCGAATA…
Contig18292 29 reads, 314 bases	p3	(CAA)6	18	10	27	AAACAACTGCAACAACAACAACAACAACTGAACAAACAACTGAACCAACAACTGCTGAACCAACAACAACTGAACCAACAACTGCTGAACCAAAAACAACTGAACCAACAACTGAAACAACAACTGAACCAACAACTGAACCAACAACAACTGAACCAACAACTGAACCAACAACTGAACCAACAACTGAACCAAAAACTGAACCAACAACTGAACCAACAACTGAACCAACAACTGAACTAACAACTGAACCTACAACTGAACCAACAACTGAATCAACAACTGCTGAACCAACAACAACTGAACCAACAACT
Contig18482 238 reads, 634 bases	p3	(GTC)6	18	482	499	GGGTAATGCTTATTACAACTTACCAAGAGATCGCTGTCCATCGTAGACTAACAAGATGTACGCTGTCGACAGACGACCAGGAGCACCTGCAGCCCGAGGTGCAGGCGCAGGCTTACTAGGTGGCTTGGGCGGTGCTATTACCTGTCTGTGTTGTTTATCAGCACTCGGCCTCATTGGACTGTGGGCAACGTTCATTCCATTCGTCGCCTTCTTCAAATACGCCTATGATCAGGACGTGAGAGCCTACGGTGGCGTGCCAAGCCTGCAGAACTTCCAGCAAATCTTTCTTCTTCTCGCCATCTGCTTACTATCGATCCGTTTGGTCAAGCGGCAGATGAATACATAAGCTCCTAGACTTTCCTTTTCCGCACCTCGAACTGCAGTCGTTATCGTCGTCAT…
Contig18508 13 reads, 85 bases	p3	(ACA)7	21	47	67	TGAATATGACCTCATCAAAGTTCCCAAATTACCAGTTCACACGTTGACAACAACAACAACAACAACAACGACCAATACACCGACG
Contig1857 822 reads, 524 bases	p3	(CAA)7gccctgagccaaaaacaagccctgagccaacaacaagccctgagc(CAA)5	81	427	507	AAAAAAAAAAATAGGGATAACAGGGTAATAGAAGAGCGTAGCTGACGAGAAGGATTGATCTTGCTGGGCAACAGTTTTTCTTGTTCAAAATGAAGATCTTCATTGTTATCTTACTGCTGACGCCACTGGCTGCATCATCGTCAGAATCTTCCGAAAAACAGGATTCGAAATGTAACACGTCTGTTTGTAACAAAGAGTGCCGGAGGGTCGGTGCCCAAAGCGGGCGATGTGTCAAAGTTGTCCCCCCTGGTACCGAAGTTGAGTCTGAATCTGCTACTCGGCTGTGTTACTGCTACGGTGTGAGTTCAACTCCACCTCAGACTACATCCGCGGCTACAACTACAACGACCTCTCAGCCCCCAACAACGACAACCACAACAACCCCTGAGCCAACAACAA…
Contig18967 20 reads, 302 bases	p3	(GAT)6	18	155	172	CCCTACACGACGCTCTTCCGATCTCTTAACTTATTTTTGTGTAAATAGTAAATTAAAACAAAAGTTAATAATGCCTAAACCAGTGAAGAAAAAGAAGAAATTTATTCGCAAAAAAGAATCCACAACTTACCGTCTTATCCCTGGATATGTTAAAGATGATGATGATGATGATGAAACATCGACAGATCTGAACAAAAGAGTTTGGGGGAAACTGAGACAAGGGAACGGCCTCCAAATGCTCAGGTCCAGCTTATCTTCTAGTGACCTAGACAGTCTCAAATCGTTGTCACCCAGTGATCTTC
Contig19501 114 reads, 502 bases	p3	(ACA)7	21	122	142	AACAATGACAACAAAGGTCACAACAACGACAAAACCACCAACAACGACAACAAAGGCCACAACAACGACAAAACCACCAACAACGACAACAAAGGCCACAACAACGACAAAACCAACGACTACAACAACAACAACAACAACAACGACAACTGAAATCCCAACAACAACAGTCGCCAGTTCTTGCACCTACAATGGCAAGACATATGCTATCAATGAACAATTTTCTCCTGACCCCTGCACGTTCTGTTGGTGTATGGAAGGTGGAGAACATATGTGTGCCATGATGTCATGTATGTCCTGCCAGTATGGTAACGCGATCTCCATCCCAGGGCAGTGCTGTCCGGTCTGCCAGACGACGCCTTTCCAACCGCCAAGCTGCGAGTACAACGGAAAGATATT…
Contig19510 14 reads, 161 bases	p3	(AAC)6	18	60	77	CAACAGCANAAAMAACAGCAACAAAAACAAAACAACAACAGCAACAACAACAAAACAAAAACAACAACAACAACAACAAAGCAACAACAACAAAACAACAACAATAACAACAACAACAAAACAACAACAAAACARCAACAACAATAACAGCAACAAAAAAC
Contig19660 43 reads, 438 bases	p3	(TCA)9	27	378	404	GACGCTCTTCCGATCTCATTCCCTTAAGTATCAACTAAATAGACTTCATTACCCCAGGTGTCCATTAAATAGACTTTCATTACTCTTGGTGTCCACTAAATAGACTTTCATTACCCCAGGTGTCCACTAAATAGACTTTCATTCCACCAGGTATCGACTACATTGTGAACAACTTCCTCCCTCTTGGTCGAAGTAACGCTGCCCAACTGGTCATTGTCATCACTGATGGAGCTAGTCAGAACCAAATCGTAAACAATCTTTTCTTAAATTATTATAAGAACAATGGATATATACCATTTTGGAGCATGTCAATCAGTCACAGATGAAAGCTCAGAGTGAAAACGTTCATTACTGTTATAGACCAGCTTGCATCATCMTCATCATCATCATCATCATCAT…
Contig2031 2842 reads, 871 bases	p3	(ATA)6	18	21	38	CGAAAAAGGTGATGCAGAATATAATAATAATAATAATAAATTGATTATTTATATAGCGTCTGTATCCCAGTAAGGAACTGGGCTCACAGCGCTTTACATGAAAGAAATAACATACTTATAAGTATTAAATTAACATTCATATCACAACAAACACACACAATTACAATACATTATACATAAGCTACGTTAATCATTTACAAGAAATGTTGTTTCATCAATTTTAAAAATAAATTTTGAAAAGATGTGTCTTAAGTGCAGTCTTGAAGGACTTGGTTGTTTGAATACTACGTATGTGTAATGGTACGTTTTGGTGCGTGTCGTAGGAACAGAGAGAACGCGTGTGTCTGCAGAAGATCTTAGCTTGCGAGTGGGTGAGTAGACCGACAAAAGTTCAGTAAG…
Contig20999 58 reads, 440 bases	p3	(ATG)7	21	271	291	GGATAACAGGGTAATGCTTATTACAACTTACCAAGAGAATGAACAATACGTGCGTGATTCTCGTACTGGCCTTTGCATTTGTTTCATGTACTCTCTCATCCTATCTTGATATTCCTGCTCCACCTGAACGACCGATGCGTTTTAAAACGAAGGAACAAATCGAAAATTATCTCAAAGCTGTCAAAGATTATTACGATGCATTCAAAGTGAAACTTGTTCGTCGAGAGAATCTTGCATTGCCTTTGCAAGACAATTTCGATCAATCGACCCATGATGATGATGATGATGATGCTCTTCAAGAATCTGTCGATTTATTCAAGCGATTCTATCGTCTATCACGGCGAAATTTACCGATGCGAAATTCATTCGAGCAACATGAAGATGACGAAAAAAATTTCA…
Contig21250 54 reads, 222 bases	p3	(ATG)5agggtgatgatggtgatgatgatgtga(TGG)6	60	118	177	GATATTTTTTTTGTTTATTGGATCGCAAAAAAAAACTCAAAATACAACAAATGGATACATGATGTTATTTAAAAAGGAAAAAAATGTGATTTGTTGCGACGATCAATGCCATCCACCATGATGATGATGATGAGGGTGATGATGGTGATGATGATGTGATGGTGGTGGTGGTGGTGGACAGTATCCAGGAACAGGTGGTGGTGGGCAATAGCCAGGCACTGG
Contig21691 54 reads, 291 bases	p3	(TCA)9	27	86	112	TTYAMWGTCTTCCATTTCATCAGGAGGTGGCTGATTTCTGGTTCGCTGGGCTGGTGCTTTGCCCATCATTTTAAAGTCTTCCTCCTCATCATCATCATCATCATCATCATCATCGTCGTCTTCATCATCGTCCAAGTCAATATCTGAATCACCGGAGCCACTTTCCTCACTTATGGAAGGGTTCATTGCACCTGCCACTTTGCCAACTTTCTGTTGACCTAAGTTCCTTGCTGGAGGAGTTAATCTCGCTTCTGGTCTGAAGCGATCAGCCACCCGAGCACGTGCTGATAT
Contig21718 19 reads, 148 bases	p3	(CAT)6	18	69	86	CGCTCTTCCGGCTGTTTCTACGCCCATTGACCTCTTCACCTCAGTTATATTTGCAGGTGTAATCCAACCATCATCATCATCATCATCTTTTTCCTGCTGGGAATTTTCTTCAGGATCATTACTGATATCTTTTGATACATCATTTTCA
Contig21933 95 reads, 509 bases	p3	(AAT)6	18	436	453	CGAAAACATATACATTACATCTTGCGAAGCGAAATGTGTTATTATGTATTAAAAAATATGATAATGATAATTTCACAATATCACCCAAACCTTGGAACTACATGATCTTACAACCAGGCAAGCAGTCACACACACGCACGCACAGCGTGATTACACCAAGCAGTGGAATGGGTGGGACTCGTGTCATCCGCGACAATAAATAATGCTACATACTTTTAAGAACATGAGATATGAGTTAATGGGGGGAAAAAAAAACAAATGCTTATATGAAGTATCTTCAAATGCACAATGAAAAGCTTCTTGCAGCATGCACACAAGAAGAAGTCACATGACATGAAATGATGGGACACATTTAAAGCCGACACCGTGTCAAGTTCAAGGACGTAATAAGTTAGCATA…
Contig21977 17 reads, 194 bases	p3	(ATG)8	24	54	77	CTTCCGAGMKCTTTGACAGAGGCCCTATGTTCCACAAGGAACTCAAAGGACAAATGATGATGATGATGATGATGATGACTTAGCTTCAGTAATGTTGCAGAAATAGACACATTCTTCAGCTAAACAGTTAAACGCACATATATCCATATCTATTTTTTTTTATTCATTTCAATTCNTATTACTGTCAATACTTG
Contig22450 10 reads, 173 bases	p3	(ACA)5actaccacaactaccacaaccaccacaaccaccaccactacaaccaccact(ACA)8	90	19	108	GGGTAATCAACAACCACCACAACAACAACAACAACTACCACAACTACCACAACCACCACAACCACCACCACTACAACCACCACTACAACAACAACAACAACAACAACAACTACCACAACCACCACTACAACTACAACTACTACTACTAAGGGCTGCCCCACTACTACCACTAC
Contig23230 60 reads, 240 bases	p3	(TAA)6	18	127	144	ATTGTTTCAATGGTTTCACTATTGTCACCCAGCTTAAATATCTATCTATATACATATAATCAATATACAAAATTTGCAATGTATGTCACGTCCCGTCTGTCCTGTCCGTGACGCTATAAAAGCGTGTAATAATAATAATAATAATATCTAATTTCATTGCTAAGCATTACAGATTCATCCCCCCAGCCCCCGCACTTTTATTAAGATGTCGGTACGCTGTGCCCCAAGAGATCGGAAGAG
Contig2425 194 reads, 287 bases	p3	(TCA)5tctgagtcatctga(ATC)5	44	174	217	CSGCCAGTAGTTTCTTTGAAATGCCAACTTGTCTGTCACAAATCAGGTTAACATTATTTTTAACATTCTCTAATGTTTCAAAAATTAATGACAAAATTTGCTGCTAGAAAAGTTTCACCACACCTACATCCACAGTGTTATCAAGTTTTAGCTTTTACTTTTCAACTTCATCCTCATCATCATCATCATCTGAGTCATCTGAATCATCATCATCATCGTCGTCGTCATCATCGATSRSATTTCCTGTGAAAGGACACTTCTTGTCAATGTATAAGATCGGAAGAGCG
Contig25039 15 reads, 131 bases	p3	(ACG)6	18	58	75	GCTGATACCACCACAACGGCGTCAACTACAACAACGACCACATCAACAACTACTTCAACGACGACGACGACGACGCCTACCACCACAACCGCGACGCCTACCACCACAACTACGACGCCCACCACCACAAC
Contig25549 12 reads, 123 bases	p3	(CGA)5gccgggcgacgaggaggaggacgacgagctggg(CGA)6gctt(GAC)11	103	6	108	CTGGGCGACGACGACGACGAGCCGGGCGACGAGGAGGAGGACGACGAGCTGGGCGACGACGACGACGACGAGCTTGACGACGACGACGACGACGACGACGACGACGACGAGTCAGACGACGAC
Contig25935 29 reads, 219 bases	p3	(AAT)7	21	135	155	ATTCCTGCTGAACCGCTCTTCCGATCTCTTTTTACATCAAATAAACAAACATCACACAATTGTACATAATCTCTCCATTCTTGATAAGTTAGCAGGTGCAATTAAACAACTGATCATTTATAGGTTCACTCATCAATAATAATAATAATAATAATATGTCACATACCAATTTAATATGACAACTCCAKGAGGTGGGAATTTGAGAAATAATTATTTTAT
Contig26779 148 reads, 576 bases	p3	(ATC)6	18	369	386	TTTTTTAAATCACTTAGGCAGCACCACATAAACTATATCATATACATTTATAATTTCATGCAGTTAAACTTCTGACGTGGCCCAATAACTGTCGGAATATGAGGTTTAGGTGTCAATAATATAATCTTAGAAGTCACTCTTGTCAAAGTTAATTGTTTACGTAGTCGTCGCTTAGGTGAACATGAGGACCGTTGTTAAGCACGGACCCAGTAGGAATTGTTTAAACACTGCGTTGCTGGGGCCCCAGATTGTCGGGAATTCTCTCCGGGGCCACAAATGTATTGTCTCTTCCGTGTCGGGGCTGTGATATAGCGACCTCTCTCACAAAGGGCCCAAAGTCTTCAATGACCCTCTTCGTGATAGCGATGATCATCATCATCATCATCGTGCCAATCCGCC…
Contig27006 54 reads, 451 bases	p3	(AAC)7	21	38	58	CTTCTGTTAGGTTTTGTTTTTCGATAAACAGATGCAAAACAACAACAACAACAACAACAAGAACTTATGGAAATGATGATGATGCGATTGTTGTCGTTGATTATGTTGTTCTTCGAATCGTCTAACGATATCGACGAAGACTGAGTTGTTGTCGACGTTTCCAACATTTTCGACGTGAACCACCTTTGGTCAATGCATAACGATGACCATGACCAAGTCCACGAGATTTTCGTCCAGCTGATGTTAAACCACGTAATTCTCGATGTTTCTTATTCGCACGACAGATCCAATTGATTCGTGCATCTTGACGAATACCTTTATGAAATGGATCAATAAGAATAACTTCATAGAATTTGTAKGTTGCATCTTGGGCAATCCAATAGGAATTCAATACACGTA…
Contig27233 41 reads, 329 bases	p3	(AAT)7	21	25	45	ATCAATAATACAAAAAGATGTGGGAATAATAATAATAATAATAATTATAATAGTAATAATTTAAGCACAAAATCTGAGGCAACAAATCAACATGTTGCAACGAGAGAACATCTTTCCTTGTCAAAGATTGGTTGAAAACGTCTAAGTGATATGTACTGGTAACACTAAAAGCAAACACAACACCAACTATCTACATGTAATTAATTGTCTTCCAAGAGAGGAGGTGAAGCACAAGCTTGAGTTAAAGAGGGGCAAATATCTAGTCTTAGGTTATCACAAGCTTGAGTTAAAGAGGGGCAAWTAYCYAAGATCGGAAGAGCGGTTCAGCA
Contig2837 2039 reads, 808 bases	p3	(AAC)6	18	150	167	ATTTAAACAACAACATTAAGTCATGGAAAATCATACTTGTAAGAAAATACTAATATCCATTACTAAAGCAGTTCTAAATGCATCATTATTTTTAATTTTTTTTTTGTATCTCAAGGCTTAGAATACATGGCAAAAAAAAACAAAAAAAAAACAACAACAACAACAACAAAACAACAACAAAACAACAACACACACATTCAACATTCGGGGTGACAAAAAAACGTTCTCTATGTAAGTCCAAGTGGCCAACTTGCCAAAACACTGATCAATGTCAAGGTTGTTGCCCCAAATGTTTGAGTGGAGCTACTTCTGCCACTAGTGGTAGTCTCTGTGTTTGAAGTTGAAGTAGTACACACTGTTGTTGTTTCCGTCTGATGTGATGTTATTATGGTCTGCCTA…
Contig29139 86 reads, 487 bases	p3	(TCA)6	18	72	89	CCATTTGTTTGCGTTTCTTCAAATGGGAATATCCTCCCGAATTGTAAATCGATGATCGTTTATTAATCAAGTCATCATCATCATCATCAAAACGTGTAAATTGTTTTGGTACAATGACGTGATTTTCATTGACATGGGACATTAGAAATTGATTGGCATGTGCACGTGCTTGTTCAGATGAAAACGATCGACGATCTTGGACGGAGGATTGTAATAAAGTTGAATCCCCTCGTGGATCGAAGATCTTCTCATTGGAATTGATCTTGGTCAATGGCGATGATGAAATACACGGGAAATATGCAACGAGTAGAACAAAAACAGAGATAATCATTAGAGATGATGAATAGAACGCAGAAGATTTTCTTGTAATCGAGGGAAATAAACGAAAGAAAATCAAAC…
Contig2934 706 reads, 553 bases	p3	(AGT)6	18	282	299	TTTTTTGTTACAGTAACAAGCTTTATTCATAAAAAAATTTTAAACTGAACCACCAGCCACACTCAGACAATAAAAACAAAACACAGCTAACCACACGTGAATGTACATTGTTCCCTTGGACTTGGAAAAAAAAACCCAGTAATCCCCACCCTTTCTTTGCCACACTTTAGAAAAAACAACAACCATAAACCATTCACAAACTCACCACACATCACATTTAATGATTTATTATATTACAGGTTCAAGGTCACAGGCTCACCACGCATGAACGCACAACACCGAGTAGTAGTAGTAGTAGTAGCAGCCAGGGTCTGAACAGCAGCCTCCTGTGACGTCTCACGTCAACACAAAATACCGAGAGGGGAGGGACCCATCAGTGTCGCAACATTCTCTCAAAGA…
Contig29378 231 reads, 618 bases	p3	(TTA)6	18	331	348	CTTCGACACACCGCCCTAACAAAGGCTGAGACTGGCAAATTGAGATTTACATGGTACATTCTTGAAAGGCTTTAGCGACAAAGATATTGATCACTTTAGAAATATTGTCATAGTGTTAGTCAAATTGAAACATGATTACAATATGTAATGAATAAATTTACTGAACCATTGGTTTTGAAAATTTGATGGTTTTATAATAAAGCAATAAATGACTCTTTAGTTTCAACAAATGTATATCATCACTTTGTTGGTTTACACCTCCTTGGGCAATGTTCCCCACTGCACAACTATCATTTTGCTACACAGCAAATGGTTGAAATGCTGTGCTTTTTATTATTATTATTATTATCTTTAGACATATGATTTAATCTAGTGTAAATAGTTAATATAATTTTTGCA…
Contig29735 100 reads, 737 bases	p3	(AAG)6	18	103	120	CCTGCTGAACCGCTCTTCCGAKSACAACACTCACCTTTATTCGATAATCTCAACTCATATCTTCGTCTATAAGTGACTGATCGAAAAAAAGGTTGGGAAAAAAAGAAGAAGAAGAAGAAGAAAGAACAGTTCACACTAATTTGTCTATTCATCTCTAATAAGCAGCAGGCATATAACCATGTGCACCAGAATACATCGCTGCAGCAGATGGATCATAAAAATTCGGTTGTTGATAAGGAGCAAAAGCGCCTTGTTGAGCAAATGCCGCTTGACTTGGATCGAAGAACGGTGTTCCTGCTCCTGGTGCTTGTTGAGCTGGATAACCAAAGAATGGTTGAGCTTGAGGTGGAACTAATCCAGCTTGTTGAGCAGCGCCCAATGGCATTTGAATGGGAGGAA…
Contig29849 15 reads, 115 bases	p3	(GTT)12	36	27	62	CGGGTTCGTAGTGTTAACGAGATCGGGTTGTTGTTGTTGTTGTTGTTGTTGTTGTTGTTGTTGGGGTACTTGGTTGACGGAGTTGATCACTTGGACTGGTTGGTAGATTGGCTGG
Contig30852 32 reads, 338 bases	p3	(TCA)6	18	130	147	GCTTATTACAACTTACCAAGAGATCATGACGTCCACAAATAGCGATAATCAACAAGGAGCATCGAGTAGTGTTCCGATCTACAATGCTGCATCATCGCATGAACATTCTCATGCATGTAATGATCCATCTCATCATCATCATCATCATTATCCTCCGTTATTCGATCAAGATGAAGATTATTCGTCAATGTTAGCGGCTAAGAATGAAATGTTGATGAAGAAGAAAGCGAAGAAAAATGCGAACAATGCAGGTGTAACACGTGCGGAATTAATTCCAGGTCATCGTGGAAATGGGAATATCGATGATCTAGTAAATTTTATCAATGGAACAACACCAG
Contig31758 27 reads, 351 bases	p3	(CAA)6	18	246	263	TACCACGCCAACAACAACAACACCAACNACCACGCCAACAACAACATCAACTACCACACCAACAACAACAACACCAACTACCACGCCAACAACAACAACACCAACTACCACACCAACGACAACAACACCAACTACCACACCAACGACAACAACACCAACTACCACTCCAACAACATCAACTACCACGCCAACAACAGCAACAACACCAACTACCACACCAACGACAACAACATCAACTGCCACTTCAACAACAACAACAACAACATCAACTACCACGCCAACACCAACACCAACTAACTCACCAACGACAACAACAACAATACCGACTACCACGTCAACAACAATAACAAC
Contig31912 24 reads, 185 bases	p3	(AAG)6	18	35	52	TGACGTTGTCGTCCCGATYGAGGGTGGTAAGGGCAAGAAGAAGAAGAAGAAGATCTTCACCAAGGCCAAGAAGCCAATCCACCGCCACAAGAACATCAAGATGCGCGTGCTGAAGTTCTACAAGGTCGAGGGCGAGGGTGAGGACGTGAAGGTCACCCACGAGCGCATGGAGTGCCCCCACCCCG
Contig32250 13 reads, 357 bases	p3	(CAA)5cgacgacgacaacaacgacg(ACA)5	50	80	129	TAGTTTGAACAAATAAAATTATTTTAAAAAATTGATTTACAAATATGTTGATTGGATTGGCCCAAATAGTAGATTCACCCAACAACAACAACAACGACGACGACAACAACGACGACAACAACAACAACAATAACAACAAAAGACAACTATATGTATTTAAATTTGATATACATGTATCTATCTAATTAAGGACTACATATTCTGAAATTTAATCCTGTCGTCTCCATTTTCATTAGTCCCAGAAGCCTTTAACTGAAGAATAAAGCTACTAAAAAATATATGTGCATAACTCATGAAGGAAAGCAACTTATTGCANCTNATANTATTATNCAGCAGTCTTTCCCTTTAAATTTTAAA
Contig33139 22 reads, 325 bases	p3	(TAA)6	18	15	32	TATTGAGTAGGATRTAATAATAATAATAATAATTGATAATTTATATAGCGCTGTATCCCAGCAAGGAACCGGGCTCACAGCGCTTTACATGGAGATCATAACATACATATAATACAATAATTAAATAACCATTCATACCATAATAACAACATACAGGAAAGTTCATTACACATAAGCTACGTTAATCATTAAAAGAAATGTTGTTTCAKTAATTTTGTAAATACATTGTGAAAAGATGCGTCCCAAGTGCACTCTTGAAGGACTYGGTAGCCGGAATACAACGAATNTGTAATGGTAGAGAATTCCATTGTTTGGCTGATTACCC
Contig34260 24 reads, 128 bases	p3	(TTC)7	21	101	121	TGTCCCCATAAAAATATGTCTAAAAACATCACTAAAAATTAACATCATACTTCAGATTTTAACAATAAATATAGCAATAAAACATTAATGCTACCATTAGTTCTTCTTCTTCTTCTTCTTCGTTCTCA
Contig34658 41 reads, 262 bases	p3	(TAG)6	18	187	204	TTTTTTTTTAGTGGGAAATTTGTCCATTTATTTGATACTCCGTAAGTAAATAAATACATGTACATTGCACAGTAAGTCTAACAAGAAGCAAAGATTAGTGGAGTATCTGGACTATGAGCAAACATGGGAGACAATACCAGTGTTACACAAAATTTCACTTCAAGTGTATGAAGGAAAATATATCCTTAGTAGTAGTAGTAGTAGGTTGTTGAGGTTGTTGACAATACAATCCATTCTGCTCTGAAGTGTGTAGATAAACCAA
Contig35257 24 reads, 217 bases	p3	(AAG)6	18	109	126	GGGTAATCACCGACTTCAGCAAAGCCAAGCCTGAAAACAACATTTAACCTGAGTGCTGCGGTGGCTGCCAGCGAGGCCAGGGAGAGGGAGAGGTCACACCACAAGTCCAAGAAGAAGAAGAAGAAGAATAAACACAAGCACAAACACAAGCATAAACATGACCGCGGCGACAGGTCCGAACGTCACAGAGAGAGATTGGTCCTGGACCTATCCAGAG
Contig3567 375 reads, 154 bases	p3	(ACA)7	21	29	49	GCAGAAACGGAGGTTACCAACAACAACWACAACAACAACAACAACAACAACTATAAATCTGGACCTTATTAAGCTCAACGAGGAACTCAAGGGAGGTAACGGCRCCACATTGCATACAATAGAGGTGTTTCAGATCGGAAGAGCGGTTCAGCAG
Contig35889 10 reads, 149 bases	p3	(ACA)6atcagttgtaattcatgcg(CCA)5	52	88	139	CATCATTTCTGTAATCGTTTTAATTTGCGCAATTTTGGCCTGCTATTTTTACCGTCGCCGAAGACTAGTAGTGATACAAAACGGATCACAACAACAACAACAACAATCAGTTGTAATTCATGCGCCACCACCACCACCAGCATACGGAT
Contig36076 43 reads, 390 bases	p3	(ACA)9	27	19	45	TCTAGATCGAGAGAGCCGACAACAACAACAACAACAACAACAACATACCATGCAATACCACGCACTCCTCGCTTACATTTTCGTCGCCCTGTTCGGCTTGTCGTTCGTCATGGTTCAAGCAAATAAAGAACGTGAACAATTCACCGATCTGTTGCAAAAACGAAAACACCTTAACGGCTACTGGGTAGGCAAACGATACATCGTCGCCTCCGACGAAGATCTCAACGAGAGCGACGAAGATCTCTCGGAAGCGAAGCGAGCATCGTACCTAGTCGGCAAACGAGGAACCTATCTGGTCGGCAAGCGAGCCTCGTACCTCGTCGGACGCAAACGTCGTGACTTGTTGGCGATGGAGAACGCACGGCAGTAAACATAGACCRCGATTTGTAC
Contig37729 22 reads, 497 bases	p3	(ACA)7	21	195	215	GGGTAATAGAATCTTCCTAATCGATATCGTATCAAGTCGACACACGCATTTCTGCAAACCGCTAAAACATTGAGATGCATTCATTATCATTGATTTTATTCGCTCTGGTTTTAATTATTGCTCTAAACACTTTGCCCRTATCTGGTAAGGCAGTCAAAAAGCCTGCAACAACAGCAGCAGCACCATCAACAACGACAACAACAACAACAACAACACTTGCAACAACAACGAAAGTTCTTGCTACGGCTAAACCTGCCGGCAAAGGATCAGGCAAAGTCGATAAGAAAAAGAAGAAAGGTTCAAAGAAAAGCAAAAAACCAAAAAAGAATCCATGGAAAATGCCGGATGCTGAACAAAAGAAACTCTTCAATGATTACAAAACCATCTTCCGTACCAAGC…
Contig38175 33 reads, 447 bases	p3	(AAT)6	18	26	43	CCTTGGCAACAGAGCCAGCAACAACAATAATAATAATAATAATGAACAGATATTTTTAGAAACCTTACAGTTTTGAGAAACGAACCAAAACGTTCAAATAAACTGGTTAATTGAAAGCCGATTATTGGTATTATGACCAGGGAGAGAGAGTTAATTAGTGTTATCGGTACACTGCCTTTAATGGTAATAATATACCGTATTTACTCAAGTATAAGTCGACCCTTGATTTGTCAACTCAAAAGTGGAATTATACATTTCTGAAACGATATTTAGCTAACTCATGTTTTTTAAAAAATCCTTTATATTAACTCGTGGTGTCTGTTTGTTTGAACACTTGATTGCTTGCATGGTTGTCGGTCGCCAAAACTTTGTATCGATTTTTAACCCACTAACTCGTAA…
Contig38190 21 reads, 266 bases	p3	(AAT)6	18	244	261	CATTCTTTTAGTCCAGGACACCTGTTTCGGCGGAMAWGSGATGAGKTGCACTGATCTCGCTCCATCAAATTAACAGTCTATGACGGTGATGCGTCCATTTCTGAACATTTGTATGAAATTTTGTGTGTGTAACTATGTTTAGGAAGATTTAGAGTGCAATGTGTTTTATGTAGTTGTTGAACATGTTTGTAAAGCGCTGTGAGCCCAGCTGTAGGCTGGGGTACTGCGCTATATAAGTGAACAAATAATAATAATAATAATATAAA
Contig38426 21 reads, 186 bases	p3	(CAA)6	18	82	99	TGAGATGTCTACCTTCTCTGACTTGCTCCCCCTCGTGCTCTTGACCGGAAACTACGGAAACAACAACCGCAACTGCCGACGCAACAACAACAACAACAACGACTTGTTGCCCTTGTTGTTCTTGGGTGGAAGCACCATCTTCGGCTCTTCCTCCTCCTCCTTGTTGCCCCTCGTGTTGCTGTCTGG
Contig39 12639 reads, 936 bases	p3	(CCG)5	15	810	824	CCCTATTTTTTTTTTTTTTTTTTTGATAAAAATATCGTTTAATTGCTTCAAACCAAATCAGGCCCACATAATAAATCAGACAACATCGGTGTAACTTAACAGCTTGTTTCAACCAAAATACTTTTTTTTTTTACTTTTACCCAACAGGAATGAGATCACGTGACGGTACAATGAGAACATCGCTACACTGAAAGAAAAATGGTGGGTCGTTGTTGGTCACATACTTGATCTGGACAATCATCTGACCAGTAATTGACGGGACTGTGACGTCATCGGAGTAGAGCGCCAGGGAAGGTTCGGACGTGTCTGGAATTCTGTGAATCTCTTTTAGGGACGCTTCATCGGCACCGATAGAAACAGCGAAGTAACCTGGCGTGACGGAGTTGAAGTGGTCAAGAT…
Contig3946 174 reads, 628 bases	p3	(TGT)5ccacatcccttgccctgcgacgacaatgtccttcatgttgttgttgctttgttgttgttgctgttgtatttgttgttttgttgttgttgtt(TTG)5tagttgttgttttgttgttgttgctttgttgttgttgc(TGT)6tttgc(TGT)5t(TTG)5ttttgtttttgttgctgttgttgtttttgttgttgttgctgttgctgttgttgttgctgttgttgcttttgtgttgtttttgc(TGT)6tgctgttgttgcttttgtgttgtttttgttgttgttgctgttgttgctgttgttgcttttgtgttgtttttgc(TGT)5tccacatcccttgccctgcgacgacaatgtccttcatgttgttgttgctttgttgttgttgc(TGT…	479	72	550	TTGTTGTTGCTGTTGCTGTTGTTGCTTTTGTGTTGTTKTTGTTGCTGTTGTTGCTTTTGTGTTGTTTTTGCTGTTGTTGTTGTTGTCCACATCCCTTGCCCTGCGACGACAATGTCCTTCATGTTGTTGTTGCTTTGTTGTTGTTGCTGTTGTATTTGTTGTTTTGTTGTTGTTGTTTTGTTGTTGTTGTTGTAGTTGTTGTTTTGTTGTTGTTGCTTTGTTGTTGTTGCTGTTGTTGTTGTTGTTGTTTTGCTGTTGTTGTTGTTGTTTTGTTGTTGTTGTTGTTTTGTTTTTGTTGCTGTTGTTGTTTTTGTTGTTGTTGCTGTTGCTGTTGTTGTTGCTGTTGTTGCTTTTGTGTTGTTTTTGCTGTTGTTGTTGTTGTTGTTGCTGTTGTTGCTT…
Contig40014 20 reads, 435 bases	p3	(CAT)6	18	197	214	TTTAACATTTCCATAAGAAGCCAAATGTGCATACATTTTAGTTGTTTTTATGACAGTCTTGTCTAAAGAGATCATTTATGGAAACTCAATCATTAAAAAAAACTTTAATAGTAATGTGACCATACTAGCAGTGAATGTTAATCAGAGTCATCATGATCTCTGGGATCATTGCCATGGCCATGGTCATCATCTCCACCATCATCATCATCATCATCACCACCATCATCATGTCCCCCTCCAGCGGGCATTGAAGTAAGACCGTAGTGACCTGGCCACGTATCAACATCGGAGCTACCTTTTTTTAAGTCAGCTACAGATCCAAATGACAAGATTCCACTAGGTGTCTTAGAGTGTTTATGAAAAGGAAAGTCATCTTTATCATCAAAACTAAAGCGAACA…
Contig402 4052 reads, 968 bases	p3	(AAT)5	15	123	137	TAAAAAAAATAGGGATAACAGGGTAATACAATCAAATTAGCCTGTTAGCTCTAAGAGATTCGAAGAGGAACGGCGTTTAGATTTGATCACTGTGTGCCACAAAGAATCAAAACTGAATTTTAAATAATAATAATAATAAATCTTTAAACTTCAGAATTTTAAAGTTAAATATATTTTAATGTGTTTCTGTCGATAGAGCAGTAGCGAGTTATTGAGTCACTGAGATTTTAGACGCAGGTTTATTTCTGTTTTAGATAGTACACGGACCACAAAGAGTCAAATATGTTTACTTATCTACTACTCCTGTGTGTGGCTGTTTGTAACGCTGCCCCTTATGCCAACGCCGGCCTTAAAAGACAGGACGAACTGCCCACATCGCTGTACGGCAACCCACTCAGC…
Contig40340 12 reads, 205 bases	p3	(TTG)7	21	18	38	CCACCGGTTTGTTGATTTTGTTGTTGTTGTTGTTGTTGATTTCCACTGCGAGATTTCAATTTTGGAATCATTTCTACCAGGTAAAATAAGAGATCATCTTTGCTTTTAAATTGATCTTTAACGAAAGTATCATCGGCATTTTTCAATTGCACACGAATTCGACCACGATATTGAGGTTCACGAGATCGGAAGAGCGGTTCAGCAG
Contig41565 14 reads, 313 bases	p3	(ACC)6	18	223	240	CTTGTAACAAACTTAGTTTTGTTAATTATATTATTAATATTATCACACGTATAAATAAGATAACTCTGTAATGCACTTCTGCTAAAGACTGTTACAATAAAATATATTTACAATAAACAATTTTTAAGGTTTTATCCATAGCGTTATGTCTCTATGTTTAAAACAAWTACTTGTCCAGTATTCAGCATTAACTTGTCAAGAAAAAAGAGTGCACAAATCATGACCACCACCACCACCACCTTATGGAACTCATTGATCCTGTGTTGGTGCCCAATATGAACATGGTCAGATCCAGAGATCGGAAGAGCGGTTC
Contig4183 1344 reads, 1200 bases	p3	(AGC)6	18	385	402	CGCTCTTCCGATCTGCTTATTACAACTTACCAAGAGAGTTTTCGTCTGTTCTATTCATCATCTAGTTACAATGGGTTTCGGTGATCTTCAATCTCGTGATGGACTTGGTCTTCTCAATACCTTCCTTAATGATAAATCCTACATTGAAGGATATCGTCCAACGCAAGGTGATGTAGTCGTGTTTGAAGCCGTGAAGAAAGCTCCATCAGCCGATCTTCCTAATGCTCTTCGTTGGTACAATCATATTGCTTCATTCAATGACGGAGAAAAACAAAAATTCGAAGGTCAACGTCAATCAATTGATTCATACGGACGACAACAGGGTCAAGATAGCCAAGTAAAACAAGAATTCAAATCACTTTCCGTCAATCCGGCGGAAAAGAAAGCAGCAGCAGCAGC…
Contig42002 11 reads, 112 bases	p3	(TCT)5(GTT)6	33	13	45	CGAGATCATTGATCTTCTTCTTCTTCTGTTGTTGTTGTTGTTGTTTAGAAGCATTTACGATGGACAATTGATGGACCAGCTTCATCGTATTCTTGTTTCGAGAAGAGCGGTT
Contig43131 16 reads, 162 bases	p3	(CAA)5	15	93	107	GCCAGCCCGGGCCACAGGAGATCTGTCTCCCCCAGCAACCTCAACGGCATGGATCACAGCTCGGACGAGAGCAACGATGACGACCCGACCGCCAACAACAACAACAACACCACCACGGCCGGCAAGAGCCACGGCCCCAACTTCCTGTACCAGGACAGCAAA
Contig4341 2060 reads, 685 bases	p3	(GTT)6	18	2	19	CGTTGTTGTTGTTGTTGTTGTGTTTTTTTCTCTTTACTGTTTATGTATTCCATTGTTTAGTAAAATAATTTTTCAAAATATTCATTGATGTTTAATCTTCGTAGTAATTCTTATTTAAAGTTTTGAAAGTACTCAAAGACGTGTAAGTGTATCGCTCGCATCCCTGCAAAGGTTGTTGACACCGAGAGCAGCAGATAGTGACAGAGGAGTTCCTGAGGTCTCAATGAGATGATTTTTGGCAATGGTTTGTATAGATCTTATGCAACATTTCAATGCCAGTGTTGGGAATACATGGGACCTGGGTTTAAGGATTATGTCAAACAGCAACAGCTTTACGCCCCCATAGCTCCAAGCATGGCAAGGGGTGCCATGCCCATGCCTCCAGCACCTCCACCCATG…
Contig4356 14 reads, 97 bases	p3	(ACA)7	21	26	46	TACCAGGCCAACACCAACAACAACTACAACAACAACAACAACAACAACTATAAATCTGGACCTTATTAAGCTCAACGAGGAGATCGGAAGAGCGGTT
Contig4357 11 reads, 110 bases	p3	(GAT)6	18	27	44	CGGGCTTTGGTGCTGCGGAGGAAGAGGATGATGATGATGATGATTTATTTGGGAGTGATGATGAGGAGACCAAGGCCCTAAAAGCTAAACCTGCTGCTGCTGCCCCCACG
Contig4358 1341 reads, 1199 bases	p3	(TCA)5tctgagtcatctga(ATC)5	44	76	119	TGCTGCTAGAAAAGTTTCACCACACCTACATCCACAGTGTTATCAAGTTTTAGCTTTTACTTTTCAACTTCATCCTCATCATCATCATCATCTGAGTCATCTGAATCATCATCATCATCGTCGTCGTCATCATCGTCATCATCATCTGACTCAAATGTGTGGTCAGGAATATCGTAGATCCTAACAACAGGCTTATTTGGGTCTTTCATGATGAGGTATTTGCCCTCCTTCAGCTTCATACAGGTGTCAACAATGCATCTAAGAATTCCCCATGCATTGTCCATGTTCAGATTGATTTGATTAGCGAACTCCACAGGTTTAAACTGTTGTGTGCCAAGCAGTACATGCTTTGCAGTGTCCTTTGCATGCAAGCGGGAAACATAACCAAACTTGATCTGA…
Contig43703 52 reads, 774 bases	p3	(ACC)5	15	360	374	AAAAAAATAGGGATAGCAGGGTAAWATGATCCCGTAGCTAGTGTGATGAATGCTGATGCCTCGCAAAAGATCACACCGGAACAATTTGGTCTTGGCAAAAATCCATCGTTACAATTCTCCACACCAGGCGGTGGTTTTGTTCAAGTCTTTGGTCCCTTGAAAACACCCAATAACGACAAATTCTTTCATGATCCCAATCCAGTGGTCATTCAAAAGAAATCTAAACCAGTTACCTATGTTCAAAAAATCAATTTAGCTTATTACAAACCACCTGCGCCACCAGCTCCAGGACCCGTCATCATCAAAGAAGTTCGTCCACCACAAGCACCAGTTCCACCACCACTCTTCGTTCGTATTCAACCACCACCACCACCTGAACAAGCACCACTAGTCATTCGT…
Contig44292 22 reads, 320 bases	p3	(GAT)5	15	153	167	AGCCAGCTCCTGAAAAGGAAAAAACTCTACCAAAGAAAGACAAAGACCTTCTTTTGCATGCAAAAGATACTGGGTTTGATGACATGGAGATGGAAGATGAAAAACGAGAGATTATCAACAGAGAAATTAACAAGTTCCGTGACAGACATAAGGATGATGATGATGATAAAGAAAGAGACAGTAAAGACAGGGAACGAAGTATTCTCCGCGAAAGAGAGCATCGCCGCCAAGAAGAAAAACGTCAACGTGAGCGTATGGAAAGGATGCGTGAACAAAGAGAGCGAGACCTCACTAGAGACAGAGATAGAGATAGAGACAGG
Contig44376 11 reads, 186 bases	p3	(GAT)5	15	88	102	CCGGCAGCTCTTCTCCTCTTCCAGGGTTTGAAACGAGCTTATGCAAGTCGTGCTCTGGATGATGAAAGTGACTCAGATGACTCAGACGATGATGATGATGATGCTTATGAAGGTGAAATCCTTTCAAGTGATGAGGATGAAATAGATGAGACTAGTCAGCAGTATTTGGAACGTTTAGAAAAGGCG
Contig44378 16 reads, 308 bases	p3	(TAA)5	15	123	137	ATTTTTATTGTATTTATAACTGTAATATTCTAATTGCTGAACAAACAAACACATCCACCGAGACAAACAGCATCCTAAAAATTGTGAATTTATTTCATCAGAGAAGCCGACACTTGAAAGTTTAATAATAATAATAACTTACATTCATCTTCACTTGTAAAAAAATATATATAAAAGGGAAATAAAATAATAAAGGGAGAGAATGGGTGCTTAGGAAAACGTTTATAAAAGAACACCTTCCAGTTGAAAAAGAAAGAGTAGAGCATCACAGATTATAGACTTATGTACAGTACAACCACCATCTTCGT
Contig44520 34 reads, 429 bases	p3	(AAC)5	15	410	424	AAAAAGGTTATCATCATCGAACGGAAATCAACAAGAAAATCTACCGTATCGGTGAAGCTATCCAAGTGAAAGATGGCAAATCAGTGAAGAACACCGGTTCAACCGAACATGATCCCACCGAGAAGACAATTAATCCTATGGGTGGCTTTCCTCATTATGGTGAAGTGAAACAAGATTTTATCATGATTAAAGGTTGTTGCGTTGGTCCGAAGAAACGTCCGATTACCTTGAGAAAAACGTTAATTCTCAATCCGAAACGTGCACATCGTGAACAGATCGATTTACGATTCATCGATACATCATCGAAATTCGGTCATGGTCGATTTCAAACTCATGAAGAAAAACGTACTTTCATGGGTCCACTCAAGAAACATCGTCTCCAAGAAGAACAACAAGCAC…
Contig45057 11 reads, 188 bases	p3	(AAT)6	18	19	36	GCATTTCAACAAGGAAAAAATAATAATAATAATAATGACGTCATCAATAAGCATGCAGATAGAGGAGCTCATTGTCATAATTATACATAGGTCAGAGGTTATACCCGGTAAAGCAAATAGTTCAAACCCCCAATGGTGATGAAATTGATGACTCGAATGAAAAAAACAACATATTTTCGTCACTGTTA
Contig45200 31 reads, 444 bases	p3	(GAA)7	21	240	260	GCAAGTTTCGGAAGTTCAGCAATGAACTGAAGTCAGCTTGCTCCGAGAAAGACATCGAAGTGACCGGCGAAGCCACTCCTGGCCAAACCGGAGCGTTCGAGGTGACCGTCGATGGGAAACTAGTCCACTCGAAGAAGGGTGGCGACGGTTTCCCGGACACGGATGAGAAGAGGGAGAAGATCGTCAAGGCGGTCATGGCGACGACGTCATCGGACGGCAACGCCAAGGACGACGACGACGAAGAAGAAGAAGAAGAAGAATAGAATACACTTATATCAAAACGAGCAGTGCCGAAGGTCATCTGGAGGTGATTGAATGCAATTGTCGGCTACCCACAATGATGTCTTGTGCGATCAAATGAAACAAGTCCTCAAGACTGAACCAGCCAACTCGATGATA…
Contig45515 10 reads, 168 bases	p3	(ATC)5	15	46	60	TTCATCGTCACTTTCATCTCCAACTATAACAGCTGATTCATCCTGATCATCATCATCATCCTCATCCTCGCTGTCTCCATGGTCACTACTCACTCCCAATTCAGAAGCTAGATAATATTGAAGTGGGTTGGGCCACATGTCATCTTTGATTACCTCTGCAATTTCATC
Contig45525 14 reads, 83 bases	p3	(CAG)5	15	34	48	GGGTAATACACAGTCGCTTCATTCGATCAGCAACAGCAGCAGCAGCAGCACACGATGAGCAACCCAGTCTCCAAACAACCCGG
Contig45600 10 reads, 220 bases	p3	(TCA)5	15	120	134	TATTTATTTTCAGAAAAAACAGAGTTATTCTATCTATCCCGATCCATAAAGAATTTTCTTTGTTTTCAAATGAGTTCATCATCATTTGCTCATGATCCTAAAGGCTCCCTTCACTCTAGTCATCATCATCATCATCCCAGCTACTGTGTGAAAACTACATCTGCAGGCAGAGAAAAGTTTAATCTGTATGGCCTTGCCAGATCGGAAGAGCGTCGTGTAG
Contig45674 25 reads, 231 bases	p3	(AAG)5	15	30	44	AGYTRCTGCTGCTGTTGTTGAAGAAAAGCAAGAAGAAGAAGAAGAGATATTGAAGCAGGAAGTCAAGAAAGTAATCCCCCCTCCTCCTGTCAAAGAAAATAAACCTCCACGTCAAGCCTCACCTCACAGAAGAAGAAATAGTCCTCGMAGGCGAGAGAATCATCGACACCGCAGTCCAGTCAAGCGAAGATCAAGATCTCGAGACAGGGGAGATAAACGACACAGATCTCC
Contig46342 10 reads, 111 bases	p3	(CAA)5	15	1	15	CAACAACAACAACAACCATTTGCACCTATCACATCAAGACGATCGAAAGATCCCAGTGAAGCAGTTGTATTCGTACCTGATCCGGTCGAATTCGATACTCATACAGTCCCG
Contig46439 14 reads, 324 bases	p3	(TCT)6	18	21	38	CTGTCGCTGTCGTGTACTGGTCTTCTTCTTCTTCTTCTACTTCTTATCGATTTCGTTGTCTCTCATTTATTCAATTGTACTTCTTCATGCGTCTATACATGCTCGTCTTATCTATTTCTCAGGATGATGGTCTTCTTTGTGCACATGCACATGGCTGCCCCTCAACTATCGCCGCTTCTTACGCGCGCGCACTCTCATTTACAGTTGTATTGTCTGAAAGAACAAGAGAAGAATGTTCGCATACAAAATAATCACCCCTAACCCTCTTTTCTTCTTTCCCTTTARCACACAGAATGGAAAGTAGATTTCTTCGTTCGTTTTCTC
Contig46466 27 reads, 347 bases	p3	(ACA)5	15	103	117	GCGACACAAAAAAGAACGGAACAGCTCGTCTCCAAGAACAAAAAGAAGAAAACTCTTCTGCTAGACGTTATCTTGAGGCAAGTAGAACAGCAACACAACATCACAACAACAACAACAAAAATAGTTCATTGGAAGGAGGAAAACTTGGAATAGGAGACATTATTAACCCAAAGCTCTTGACGTAGCAGAAGACAATCGTCATGTCCGGCACAGCAGCCCAAATCTGTGTGGTCCTCCTCGTGTTAAACGCCATAGTCTTGCCGACACACGCAAATTGGTTTGGCAAAAGAGGAGATAAGGATGACATCTTCAGTCTTCTGCTACAGCAGCTGTCGCCACAAATGGAC
Contig46639 29 reads, 398 bases	p3	(GTC)7gttgtcatgtgc(GT)5	43	11	53	AGTTCTCAGAGTCGTCGTCGTCGTCGTCGTCGTTGTCATGTGCGTGTGTGTGTTTTTTTGTGCTGCTCGAAGGGAAAAAGAAGATTCAGTGGTGCATGTCGCGCGCGTTCCGTGGTTTTCGTCGTGCTGAAGAAGTTGAATTAGAAGACGAAGAGGAGAAGAGATGAGAAAGCAGATTCGTTGTGTTGCAAAAGGAAAAAGTATGAACAGAAAAAGTCAAGCCATTTTGTTGTGTTTTGCGGAGGAGAGAAGGAGATAACACCATAAATACGAGAAGGACCAAGTCGTCGGTGGCCGATCTACGAGCGACGCATGAACGTGAACAAGAACGAACATACGAGCACCAATAGCAGAAGCATATGTGGGACGAGCAGTTCTTCCGCGCCGCTACCGTTTCG
Contig46936 19 reads, 255 bases	p3	(GCA)5	15	233	247	CTGTCCACGTTGTAAAAAAACGGTTTATCCAGCCGAGAAACTGGCTGCATGCAGTAGTTCATGGCATAAAAGCTGTTTCAAATGCAAAACATGTAATACTGGTTTGACTTTGGCTACCTACAAGGATTTCGAACAAGATATTTATTGCAAAAGCTGCTATCAGGATAAACTTCATCCTCATGAACGTAATCGCAAACAATTAGAAGGAAAATTTAGCAGACAACCTGGTGCTGCAGCAGCAGCAGCAAGTTCCGG
Contig46939 13 reads, 158 bases	p3	(TTA)7	21	117	137	GAACCGCTCTTCCGATCCCGAAACTCAATTTTTGTTTTGATTGTTAAGTCTTTTCAACTTACTCAGGTATAAAATTTCATCCATAAAAAATCTAAATAGAAATGTGTATGATTGATTTATTATTATTATTATTATTATTTAAACCCTATTATTTCTTG
Contig47012 10 reads, 132 bases	p3	(TAG)5	15	106	120	ACGACAATAAGGACGATGCAGATGACCAGGAACACAATNCCACCGATGACACCACCGACAATCGCTCCGACGATGGAGGATGGGCTGTAGTAGTAGTAGTCATAATAGTAGTAGTAGTAGGAGCTGTAGTAG
Contig47292 11 reads, 119 bases	p3	(CTT)5	15	41	55	TTTTGCTCCCGATGTTTTGCATATTTCTTTTTATTTCAAACTTCTTCTTCTTCTTTTCAATGATCAAATGAAAAACAAGAGAAAGATATCATTGATTTTACGCTTTCTTCTTCGACACA
Contig48258 32 reads, 441 bases	p3	(GAT)5	15	196	210	AAAGAACCTCATCATATTGCAAAACACATTCAAGGAAAACGTTTTCAACGGGCTTATAGTCATTGGCAAGAATGTCAAGCGAATGGAACAGAATACGTTCCAATAGGTCGTAAAAAGAAGAAAGAAAAAAAGAACACTAACGATGACGATGATCAATATGTCGATCTAAGTGATGATGAAATTGTCATTGAAGACGATGATGATGATGATTTATCAGATCTTTATCCTGATTTTCGTCGTTTGCGTGCGAGCGATTTGAAAGCACAGGAGACTACAGAAGAAAACACGAGCGGAACGAAACGGAAAGCAGAAACATCAAAGATGAAAAAGCCGAAGAAAATGTCTGCACCCAGTTCGAAACGGAAAGCAGAAACATCAAAGATGAAAAAGCCGAAGAAA…
Contig48548 13 reads, 194 bases	p3	(ATA)5	15	38	52	AAAAATATTTTTTAAAGAATACGTTGTAGTGTATACCATAATAATAATAATAATTGATSATTTATATMGCGCTGTATCCCAGCAAGGAACCGGGCCCACAGCGCTTTACATGGCGATCATAACATACATATAATAATTAAATAACCATTTATATCATAATAACAATATAAAGGACAGTAAATTACACATAAGCT
Contig48724 11 reads, 248 bases	p3	(TCG)5	15	22	36	CTCCGCTATCCAATAGACTGCTCGTCGTCGTCGTCGTGCTGATGGATGGTTTGATCGAATGATGCGGATGAGGATGATAATGATGGTAGACAGGATTGTTGTAATCAACTTGATAAGCTTTTGTTCGTGGTTCACTGCCAGTGGAATCGAGATCATCCAAAGAATTCTCATCGTTATGTGAAGGACTGAGATCTAAAGTTTTTCGATCGGTTGTTTCAGATGCTCGATCACGTTGTCGACGATTTTTA
Contig49336 27 reads, 429 bases	p3	(ATT)5	15	340	354	CGATCTCTGGTACTTTACTTTATTGCATAGTCAGCTTCCTGTTCATTATATCACAAGAAATAAAACTGTGGAAACATGCCACACAGTAAATGATGTGTCATTGAAATATGCCACACAGTAAATGACATGTCATTGAAACATGCCATACAGTAAATGACATGTGTTTAATACTAATCATTAAACTTTTTGTTATACTAGACAACTAACAAGGTTATTTCTATATAAAGAAAATAAATACTGAATTTGTTAAATATCGTACTTTTGCAATAGTTACAGACTTRACCATAGAATATATTTTTTATTTGATTCATTTCTMTTTCAAGTCAGACAATGAAATCCATTATTATTATTATTTTTTTTTGCGTGTGTGTCCCTCCCATAACCTCGTGGTCGTAAGGG…
Contig49686 12 reads, 306 bases	p3	(AAT)6	18	258	275	GTGTGACTTGAAAGATATTTTAAAAGTGAAATTGTATTACTGTATTATTAATGATTGTSTTTCGATTTGCTCAAATTTTTATTTTAAATTGTTGCTCCGAAAAAATCCCATTCATAAAGTAATTTCTTTTTAAAATCCCACAATTATCCCGATGGTATTCTTTGGAATTCTGGTCAGTTGATGGCTATACACTGTAGGTATATGTTGTTTCAGTGGCATATTCCTTCATTTGTTACACCTATTTTAAGATGATGAGCAATAATAATAATAATAATAACAACCCCTTTTCAGACCCTGACGGCCTAT
Contig50089 11 reads, 227 bases	p3	(ATG)6	18	144	161	GTTCATAGTGACCAAGTGTTTACCACTTGGAAAACAAACAAAAATATGACCCTAAGATGAATGAAAAAGCATCGGAGAGTAAATGCCAGATGTGAGAACCCCTTTCAAAATGTATACACAACATGGCCAGCTACTATATACATATGATGATGATGATGATGCATGGCACACAGACACCTTCACAATAATCATATTTAGTCTTCACAATGGTTTCATGTCAACACAGG
Contig50264 10 reads, 250 bases	p3	(TGT)5	15	128	142	TGACAACATCTATTAAGTTAAGTGTCATAAATTAGATAAAAATATATTGATTATGTTTGGAAAATGTTGATGCTTCTTGTTAATTTCCACATAAGACTTTGAAATATACACCTTTCCCACACATATATGTTGTTGTTGTTGTTTTTCCAAAGTGATCGATTAGGACCATTCTTGCAGGAAAGGTGCGTCCACAAAAGTTGGACAGCAGATGGTTGAGATGCCATCAGGAGGTTTTCGTGCGTAATTCTTC
Contig50286 14 reads, 85 bases	p3	(CAC)7	21	20	40	GTCGCAGTTGCTGTGCTTGCACCACCACCACCACCACCACCATAGACACAGCAGCAGCAGTAGTCACAGCAGCCGACACCACCAT
Contig50524 13 reads, 261 bases	p3	(ATA)5	15	141	155	GAAAAACTTATAAGAAACTATTACTCTTTTATTAAAAGATCAACATTTTTTTAAAAAGTGAGACGGACAACTTTGGCATGTTGGGGATTAGAAGCTGGCATGTAGAGTAAAGTTGTCAGGAATACTGCTGTAAAAATGCTATAATAATAATAATAGCATAAAACTGAATGAGAAGATCATGTGCGAATAACATTCAACAGAGAAGCAAACATGTAATCACGGTTACAACTACAATCAGGGCAAATGTGTTGAGCATTACCC
Contig50674 23 reads, 329 bases	p3	(TGT)5	15	6	20	TTGTATGTTGTTGTTGTTGTTCTACTCTCTCGCATCTCACCGGGACCCCGCTGAATTGAGGAAACAGGTTGGCCAGTAGATAGAGATCGTTGTTCGTAATGAACCAAGGTACACACTCCCCTGGAAGAATGCTCGTTTGATGAGTCTGACGTCAGACGTCTGTCCCATTCGACCACTGTATGTAAGTCTCACTCGCTAACCCAATGTCGGTTTGATTGCTTGCTACTACTGGACACAGGTGCTAAGACTTGCTGACCGCTGAAGCTGATTCCGTCGTGCAGGCTGTACCTAGACCAAGGCCGCAGGATGCTCGTGGAACAATACACCCG
Contig51062 31 reads, 53 bases	p3	(GTT)5	15	14	28	GGTCGGAGCTGCCGTTGTTGTTGTTGTTGTCGTCATCACCGCCGTTGTCGTGG
Contig51165 10 reads, 173 bases	p3	(AAC)5	15	75	89	CCGCATCGTTAAAAAAAGTCTAGCCCCGAGAAGCCCTCGAGGAAAGTTCACAAACCAAAACAAGAAAAAAAAAAAACAACAACAACAACAGCATCAAGGATGTCAACTGAAGGAGATGCCGCAGCCGCAGCCGCCACCGAGGCAACCACCACGCCGACCGTGACCGAGGAGAA
Contig51760 11 reads, 255 bases	p3	(GAT)5ct(TGA)5	32	71	102	ATCCATTGTGCTTGATGGTGGAAGTGTTCCCAAATCACATGAATTTTGGGTGAAATTGGACCAAGATCCAGATGATGATGATGATCTTGATGATGATGATGACCAAAAACTACTGAGAGTAAACACCGACACAGCTCAGTCAGAACTGATCAAAGATGGAAGTTTCAGCCTGGGCGATTTGAAATCAGATGATGTGTTTATTTGTGACAGTGGTAGAACTGTCTTTGTTTGGGTTGGTAACAATGCTTCTGGTGC
Contig52061 22 reads, 417 bases	p3	(TTG)5	15	312	326	TAAAATTTGAATTTTTACTCTTGTTCAAATTTCATATGTAGTATAACTTTTGATGATAATTAACATAATTATTTGTTAAATTTTGCAATTTTATCTTATATTATTTGTATTATTAACTGAGAAAAGTTTTGAGTTACTGCCACCGGGCCATGGTCAAGCAGATGAGCTGTGAGAGTGTGACAAATAACAGGCCACCCTGAGCTCCAAAGCTTGTCACAGCTCTGAGCATAGTTTCATTATTTAGTAGCATGCCAGCAAAATAATGCAATAAAGTGATAATGATAGCGTAAACAACAAAATATTAGATGAGTTTGTTGTTGTTGTTGTAAATCCTCCATCCACTTCTACAAAGCTGTAATAAGTTAAATAAGCCTGAAGACATTGGTAACTAAAATCACA…
Contig52354 16 reads, 292 bases	p3	(TTC)5	15	228	242	GTTCATGATCACGTGCACGAGTGATATCGAATGGTTCGTAATTCATTGCATCCCATTCGCGTCTACGTCGTTTTGTCGTTCGTTCGCTGAACTTTGGTTTTTCTTCAACATCTTTGCTTTTTGCTGGTTTTTTCTTCTCGATGATATTTGGATCTACTCGTTCGACTGTTTGTCCACTATTTCCAACGATTTCGRAGACATTTTTCGGCAAGGTTTTCTTCGTTTGTTTCTTCTTCTTCTTCTTAATCTTTCCAGATGATTCTTCGAACGACATCTCTTGGTAAGTTGTAAT
Contig52708 20 reads, 197 bases	p3	(ATA)5	15	27	41	TGGGGTACTGCACTGTATAAGTGTACATAATAATAATAATAAACACATTCCCTACTATAATTAAGCAGCATTGAATACAAAATGTTTTGTGAATGTTTTTCAGCTAAGACAACAAAGCTGCAATAAAAAAATTCATGGGAGAGCAAACATTATGGTGCAAACAAGTTTATGAAAATATTTCCAGATAAGGGTTGGGC
Contig53583 18 reads, 319 bases	p3	(GAT)5	15	132	146	CTCGTCATCAGTTGATGATAATTCATTACTTTCACCGATTAACATTTCCGAGAGATCACCACCTAAATCATAATCAACACTCGGGATTGGATGATGTGCAAGCCTGAGTGTTGGAGAATAATCAGTCGATGGATGATGATGATGATTGCGAATTAACTGAAGAGTTGAGGATGATGGTAGACCGTGTACAGATGTGGTCGAGAAAAACAATGGGCAGACAAGTGAAACGACGAACACGGCCAGAAGATCGAGGAACATTGTGCAAAAAGACGAGGATTTAGCAGTTTGTCGGATGTTCTCTTGGTAAGTTGTAATAAGC
Contig54336 24 reads, 348 bases	p3	(GTG)6	18	275	292	GAAAAATCCGAAGAACAATCAGGACCAACAATTGTTCAGAGTACCGGCGTGCAGAATTATCGTGTTCAACCTGAAGTGATTCGACTTCTTCAAGAATCATGTTCCAATGACAAATTATGTGATCATGAAAAAGGTGTTCAATGTACTGATCCAGCTGCACATGTTATCGGAGTATTCGAACGTGCTGGTTTCACTGTGACAGCTGACAGTACTTCGGGTAGTCGAAAATTATGGATTCTGACAAAAACAGGTGAAAGTGGTCCAAGTCAACCCAGTGGTGGTGGTGGTGGTGGTCAKCAACCAAAAAAAGATGAAGAAGAAGATGCAGGAGGTGAAGAAGAAGAACAA
Contig54489 11 reads, 165 bases	p3	(CAA)6	18	92	109	CGCCGCCGGCGGACGAGTTTTGACATCATTCGGTCGACGCAACATGGACACGATCGCCAAACAAGTCGCCGAGAAACTTGCTCGTCAACAGCAACAACAACAACAACAATAGTCGACACACGTCCACCCGAGATGCGGCAAAGCGAACTCAGCAGATCGGAAGAG
Contig5464 1256 reads, 898 bases	p3	(TGT)7	21	625	645	CAATAAATATGATTAGTGAGGAATGGGATGCTGAAGAAAGCGTAAAGACTAGACAAAAATAGTGTAAAATAAATACATAAATTTCAGTAGTGGCATGGATCAGTCATTGAGATTTTTGGGAAATCTAAATTTAAAAGTGGTTTTAAGGAAGAATAAACATTCACATTCCTAACTGCTGTTGACACAGCTGATTTTAAACAGAAACATTAGAATAATTCACGCCTTGTTGATAACTTCTCATGACAGTATATTTCCGATAAAATGGTTGATACCAATTTTGTAGAACGTCACGTGTTAAACTTTTTTTTTTTCTTCTTTACGTTAAAAAAAACTTCGCGGTGACTTGTGTGGAAGTTATGGCCATAAATAGCGTTAGTGAGAGTAGTTTGGGAACCACTG…
Contig55131 11 reads, 174 bases	p3	(AAC)5	15	123	137	GGGCCCTAAGCCTMCTGGGCCCCAACAAAGGTGAGCGGTCCGCCATCAAAAGGAGGGACCCAAAGCGGCCGAAGGTGAACACGGTTCACAGACTGCTATGAAACACTATGAAGAAGGGAGGTAACAACAACAACAACAAAAAATGGGGATGGCTACAGWTAGTACGTGAGTGGC
Contig55305 12 reads, 345 bases	p3	(CTA)5	15	268	282	ATTCCTGCTGAACCGCTCTTCCGATCTTACACTGGTTGTTCAAATAAAAAGTTGTATAGCAATGACGGTTACTGCGTATAATTATAGACTGACGGTAATGATTGCATTTTTGCAATGATTTATATGCATTGACATAAGTATAATTGAATAGAGTTATTTATGCACTGCATTCATTGGTTTCGTATAATGCAAACTTTGCATTGATCGGTTGAGTGTAATGTATGCATTACATTGATTGGTTGAGTACGTGATATCTTATGTCATCGCCTACTACTACTACTACTTCATGAAGTCATTATGATTCAATTTTTTTTGCAGGAATACCCGCTCATTTGAGACATTTTC
Contig55520 17 reads, 168 bases	p3	(CTC)5	15	82	96	TTTAAATTTAAAAACAAACAATGTTGATTATATTGGATTTGAATTGGGATCATAAAGCATCATCAATTATTGGGCCTGCTTCTCCTCCTCCTCCTCGTCCTTGCTGCCTTTGATAAAAGCTTTGGCTATAGCGTACACAGCAGTAGCAGCAACTATTGCCGCGCCTCC
Contig56333 20 reads, 249 bases	p3	(GAT)5	15	33	47	AGCAASGCATTTCGTGCGCTGTCGAGCAGATGGATGATGATGATGATCGAGAGGCTCGAGCTTCGAGGAGACGAACGGATACGCACTTGCTGCCGGATCGACGGGGTACGGCTCGGCGAAGTGTCGCTTGCCAATGCGCAGGAAGGTGTGATAGCGTCCGAGCTTGGGAATGTGATAAGATGGCGTGACAAGTGGAGTCGAGATCAGTAGAACAAGAATAAGGAGCCACATCTTCTGGTATTAGTATTA
Contig5636 465 reads, 740 bases	p3	(CAT)6	18	458	475	TTTTTTTTGATTCTAMWCTGCATTTTATTTCGTGCTTCATTCTAAACATGTGACATCAAATATTCTTTTTGTTTTAAAATCCAATTCGTGATCCGTTGCCTTTCTCAAAGCGGACATTGGAAGAATTCATATGATCCAGGGAGATATTCAAGACCTTCTTAATCATCGTTTGCCCCATCATTACCATAATCGTCTTCGTTGGCCTCTGGCTCATCGTTTGCCCCATCATCACCATAATCGTCTCCGTTGTCTTCTGTCTCATCGTATGGCCCATCATCACCATACTCGTCTTCGTTGTCTTCTGTCTCATCGTATGGCCCATCATCACCATACTCGTCTCCGTTGTCTTCTGGCTGATTGTTTGCCCCATCATCACTGTCATCTTCATCATATTCTGAG…
Contig56515 11 reads, 219 bases	p3	(TCT)6	18	192	209	GCACACGCGTGTGTCGAGAGGAAAGAAACAATCAATGATTGACAAATAAGTTAAAGAACGAGGAGAAAGTCAATATATACAAAATCATTTTAAAAAAAAAGAGAGAGAAAGAAAGGAGAWGGGTGATCAATCCTCCATGGAGTTATCATGGCCACTGTCTGTCACTTGTTCGTCTTCGGGTTGTTTGTCGGTCTTCTTCTTCTTCTTCTTCKKCGCGGC
Contig56562 10 reads, 175 bases	p3	(TTG)5	15	111	125	CTGCGACGCATAACCATAGCAATGAGAACAGCAACAACAATGAGGGCTACAAGGATAATGGAACCGAGAACAATAAGAGCAACAGCCCATCCAGGTGTTGATTGTTGTACTTGTTGTTGTTGTTGTGGGACTGCAGTTCCTGCAATTTCGTCGGCCATAGCGAAAGCTGTGTCCT
Contig56861 11 reads, 111 bases	p3	(CAA)7	21	16	36	GGGTAATAACAAGACCAACAACAACAACAACAACAACTACAACAGCAACAACTACGATAATGCCGGATCATACGGCAGCAGCTACGCCTTGGCCGTACAGCAGGGTGTGAG
Contig57336 10 reads, 234 bases	p3	(CCA)6	18	96	113	TTTACTTCCACCTTGATTACCCGAGAACATTTTATAAGCACTCATTGCTCCACCAATCAAATCTCCCGAACCGGCACTTTGTCCTTTTTTTACTTCCACCACCACCACCACCAAGCTGACCGAGAAATGAAGATCCCATTGACATGAGATCCGGTTGTTGATTACTTGATGCTTTTGCTGTTTCTTGATCAACTTTACTTCGAAATTGATTGACAAAGATCGGAAGAGCGTCGT
Contig57580 16 reads, 247 bases	p3	(ATC)5	15	227	241	TGGTCCTCGTCAAATGGCTTTTGAGCGGTAATTGCCAATCAGGTCAATGCAGAGTTTCTGAATATATCTAGTGTAAAACGTGGGCTTTTTGTCAGCTGCTTCTAGTTTAGACACATAGATAACAAATGATTTGTAGCAGGCCCACATGAAAAATTTGATTAAAAGGTGACATTGTCGCCACGAANATCTNTNTGATGTACACAACAGATGGTCTAGCTCTGGATCTATCATCATCATCATCACTTTA
Contig5912 826 reads, 597 bases	p3	(CAA)6	18	1	18	CAACAACAACAACAACAACCACCTCCAGAACAACCCGTGGGGATGGGCCTCTCTTTTCCCTTTCTTCTTCTAACCCAATGCCATCGACTCTCTTTTGTAGGAAGTCCATGCCGAAAATTGTTGAAATTTAGTCTAAGATAGTGGCCGCAATAATTCAATGCCCATAATTGTGAAAGTGAACCATTGGCCAAATTGTTCATTGTCTAACATTGTGAATGTCAAGCAGTTGACGCAATATTTTAGAACTTCTTTCTTTACGTAAGTCCTTGAACTTTGAACGTACGGCTCCCCATAGTTTCAGCTCTGTACTTATTTAGATGAAAATCTTGGGTCGAGACAAACGGATGCAGGCATGATTGAAAGATGCTGTGGGGAGGGGGTGGTTTTCAGAGGTTCTAA…
Contig6248 27 reads, 219 bases	p3	(CAA)6cccctragc(CAA)13cagcggcg(ACA)6	92	128	219	GGGTAATCACCTCARACTACATCCGCGGCTACAACTACAACGACCTCTCAGCCCCCAACAACAACCACAACAACCACAACAACCACTCAGCCCCCAACAACGACAACAACCACAACAACCCCTGAGCCAACAACAACAACAACAACCCCTRAGCCAACAACAACAACAACAACAACAACAACAACAACAACAACAGCGGCGACAACAACAACAACAACA
Contig6388 76 reads, 394 bases	p3	(ACA)6	18	360	377	CAGGGTAATAATGATGTGTGTCTATCGACCATTGTCACTAGCGTTATTATTGTCTACTAGGGGCAAGTACCCGGCTCCCGCCCGGGTTTAACAACAACAGCAACAACAACAAAAACAACAACAGCAACAAAACAACAAAAACAACAACAAAACAACAAAAACAAAACAACAACAAAAACAACAAAAACAACAACAAAACAACAACAAAAACAACAACAACAAAACAACAACAAAACAACAACTACAACAACAACAGCAACAACAACAAAGCAACAACAACAAAACAACAACTACAACAGCAACAACAACAAAGCAACAACAACATGAAGGACATTGTCGTCGCAGGGCAAGGGATGTGGACAACAACAACAACAACAGCAAAAWCAAYACAAAA
Contig6454 1134 reads, 910 bases	p3	(AAT)7	21	826	846	AAAAAAAATAGGGATAACAGGGTAATAGTTCACGTGAACAAAACTAATCCCAGGTGAAACAACAGAAGCCAGCTTCTCTCTCTTCAACATGACCCCGTCACTAATCGCCGCCATCTTTGCCATCGTCACCATACTGCCCACCACCCAGCTGGACATCCCCAGTGGTCAGCTCGGCCTGGTCTACGACGACGGACGCCCGTGCGCCTCGGTCAAGCTGGCCGCCTACATCGACCTGACGTGCCCCTACTCCAAACAGGCCTTCCCGACCCTCCTCCAGGTGGCGGACTCCTTTACGGGGTCCCAGGTCCAGCTGAGGTTCTACATCTTCTCTCTGCCGTACCACAGGAACAGCCACCTCATCTCCAAGGCGACGCGCTATCTCACCGGCCTGTCGTCCAA…
Contig6811 10 reads, 146 bases	p3	(CAA)6	18	76	93	CAACAACAACAAGCCCTGAGCAAAAAACAAGCCCTGAGCCAACAACAAGCCCTGAGCCAACAACAAGCCCTGAGCCAACAACAACAACAACAAGCCCTGAGCCAACAACAACCACAACAACTCCAACAACCGAYCGGAAGAGCGGT
Contig697 7528 reads, 1153 bases	p3	(TGT)5	15	480	494	CCCCCTTTATGTTAACGACAATCTTTTTTGTCAATGTTAATGACAATCTTATTACATAATGTCTTGATGATCTTTGATCTGACACACACCCTGTTATCCCTATTTTTTTTTTTTTTTTTTACTGGAATTTAAAAATTTATTGTATTTTTTTAAAAAGGGGAAAAATATGTTTGCACAACTATTAATACTCTGAACCGATCACGACAGTTGTATGTTATATACAGAGTCCGTCCTCCAGCACTGACCAGCCGGACCATGATGGTCAAGCCGTGTCCATCCCTCACAGAACACATCATGCGACACGACCGTGACTAATGAAGCGCCACAATTCCGCCTCCCCGTCTATTTCTCTCCCTCCAGGTGGTGGTTGTTGAAGTCGTTACTGTCCAAGTCTTGGGG…
Contig7519 711 reads, 715 bases	p3	(GAT)5gaagaa(GAT)5	36	536	571	AGGGTAATATGATCAATTACTCAGCGTGGTATAGGTCTGCCGTCTGTCCACAATACACGCAAGACGTATTTTTTTAGAACAATTATTTGCTATCAAGATAATCTATTGTTTAAAAATCTATTAGTTTTATACTTAAAAGATGACTGTGAAAGGCACACCCCAAAACAGGAAAAGGAAATTGTCAGATACAGCTGCAGAGCCAACAAGTGCCAAAAAAGCTGCATTAACAACTCCTCAATCACAGTCAGCTCAAGGCAAAGGCAGAACACCAAATTCAGCCAAAAAGGGCCAGACCCCACAACAGCAGCAACAAACTCCTAAAACTCCAAATTCTGGAAATAAAAAATCTCAATTAGCTTCTAACCCAAAGTTACCAACACCAAAAGCTAAAGCACAGAC…
Contig757 7807 reads, 915 bases	p3	(ACA)5	15	300	314	AAAAAAAAAAAAAAAATAGGGATAACAGGGTAATACCTTGTGCTCGCAATCTCTACTTTCGTCGCCGAAACAGATCGCTACCAAAGTCACAATGTCTCCACTCCAGGTCATCCTCGGCTTAGCTGTCTTTGCAATCGCTAGCAGCGCTGACTACGCTGCTAAGGATGCTGGCAGCCAGTACGATGCTAAAGCCACCTACAGTGGAGATGCTAAATCTTCCTACAACTCCGGCGACCAGTACGCCGTAGCCAGCTACGACAACAAGAATGCTGCCAGCAGCTACGACGGCAAAAACCAGTACAACAACAACAACAACCAGTACAACAACAACCAGTACGACAACAGCAACCAATACGGAAGCAACCAGTACGGAAACAGCCAATACGGAAGCAACCAATA…
Contig7874 987 reads, 942 bases	p3	(ACC)6	18	735	752	AATACATGCCAGATGTTAATTCACATTCTCAGTCTTACATTTTTAATTCTATTAGTTGATGAATTCACAATTACTCTCTTTAATTTTAATGAGTAATAAAATAACACTCTTTAAAACTATCATTATGTAAACAATGCCCGCATGAAGAGGTTAAACACTAGCAGGCCAAGCAGTAGTTTATTGGCAGATCTTGTCTGGCAGTGGTCCGCTGGACTAGATCATTTATCACCTCATCAGCCATGAGAGGCCGCAATATTGTTTTGCTCTGCTTGGCTGTGCTGTCCAAACTCATCACAACACAAGGGCAATCACCCGTGTCAACACAAGGGCAATCTACCGTGTGCATGCCAGGGATATTCCAGGCCACTGTCTATGACATATTAAAAAATGCTTCAATTT…
Contig8033 1152 reads, 1497 bases	p3	(CTT)7tttcttttcagaaacctcaacaactgggtcagtagtttcttccagatcattctgtttgtc(CTT)6	99	19	117	CAGATCATTCTGTTTGTCCTTCTTCTTCTTCTTCTTCTTTTTCTTTTCAGAAACCTCAACAACTGGGTCAGTAGTTTCTTCCAGATCATTCTGTTTGTCCTTCTTCTTCTTCTTCTTTTTCTTCTTCTCTGTTGCATCTCCACCTGCTGTAGTGATCTCAGCTGTTGTATTAACTGTTGTGTCTGCATCACTGCCAGAACCACTTGCTTCACGTTGGCGCTTACGACCAGTAGCAACAGGAGTAACTTGTTCCACTTTCACGCCAGATGCCAAATTTGGTGATGCCACTCCTTTTCCTTGGCCATCAGCATTGAAATCATCTATAGCTGGATTCCAGTTTTTAGGAGTTTTTTCATTTGGTTTACCATATTTGCTGAGGAGACCTTGTTTTATCAAATT…
Contig878 4823 reads, 1007 bases	p3	(ATC)6	18	540	557	TAAAAATTATAACAGAGACAGTCATTTAATTTGCTATTGATATTATTTGTAGTTAAATTTTATGGTGTTAATAATTAAATTCCTTTATSATTTTTTTTTTTTTTGGTAGTGTTCACATAAATATATTTTTTTATTATTGCATCACATTAAACACATTTCTACACATCTGTCCCAGCCTAGATTTTGTTGAATGCTGCAACGTCAACACTTTGTACCAAATCTTCATTTTCGCCAGTGATTTTTTCAGACAGATCTTCAATGCTGACTTTGTCGTCCTCCACAACACACATGATGGTAAGTTTCTTGATGCCATATCCAACTTCAACAAGTTTGGAAGCTCCCCACACAAGTCCATCTTGTTCAATTGCTCTAACTCTCTTTTCCATTTCAGCCATGTCA…
Contig8821 831 reads, 926 bases	p3	(TCA)6	18	866	883	CTGTTATCCCTATTTTTTTTTTTTTTTTTGAAAAAACAACAATTTATTGATGGTTCCACAGTTACGTACATACAATAGAAACTAATACTATGCACAAAATGATAATTAAAATCCTTATAATCCTGGCATAACATAGGCAACACTGTCCAATGTCTGACTGTGAACTGAAGGTGAACAGCCATCCATACCAGGGACTTGTTGGGTAAGACAGAGTAGGGGCCCACAAGCACAAAGAAGGGAGTCCAACAAGACAGAGAGACTGCCTTGAACTGCTATCATACCCTTATGTTCTTGTAGTCTCATACCAATGATGCTAAGAGATTCACCAAGAAGCTTCAGGTGAGCCGCAACATCTATTGGCTCAATGCTTAAATTCTGGTCCCCAGATTTCGTTGGGCT…
Contig8930 796 reads, 904 bases	p3	(TTG)6	18	536	553	AAAATTTGCAATTATGAAAAAATTATCTAAAATAAATAATTGATCACATTTAATTTTTATTCAACAACTTCCAAATTAAAAGGAATTTGTATTCTTATATTCAATAAAAGAATGATGCATGCACACAAGGACGAGTAGTGTTAGGGAAGGGGGTGTCTTTAGTGCTAGGTATTCACTTGGGATCGGTCTAAGGGATCTGGTAGAGTGGAACACATGCTGATAGAGCGGAACACATCCTTGGATGGTGTGATGAGACAGTCAGTCATGAGCTGAAGACAGGGATTTGTTCCAGTAGTTTAAGGTTGTCCCTGGGTCAACCCAGTTCTGATAGGAACACGTCCTTGGATGGTGTGATGAGACAGTCATGAGCTGAAGACAGGGATTTGTTCCAGTAGTTTA…
Contig8987 841 reads, 1335 bases	p3	(TTC)7	21	496	516	CTTAAAATTCAAGGTAAAATAATGTACAGATGAAGTTGTATGGTTACAATATACATGAATTTCATTCAACTAACTGCTTTCAGCTCAACTTCAAAAACAAGGGTTGAATTGGGTGGAATAGGTCCTTGCTTTACATTTCCATATCCTTGACTGGCTGGAACTGTTATTTTTCTCTTGCCTCCAACTTTCATACCAGTAACACCAACATCCCATCCCTTTATAACTTCCCCTTGATTCAGCCTGAATCGAAATGGTTTGCCTTCGGTGCAGGAATCAAAGCGTTTGTTGTTTTTGGCCAACACTCCTACATAATAGACTGAAGCCATTTTGCCAGGCTTAGCTTCAGGGCCATGTCCAATTTTTATGTCTTCCACTATTGTTCCACCAGCCACTACCCTC…
Contig907 6388 reads, 712 bases	p3	(CAG)5	15	73	87	ACCGCTCTTCCGAWMWAAAAAAAAATAGGGATAACAGGGTAATGTATTTTCGGATCCTCGCCTGTATTAGACCAGCAGCAGCAGCAGAGCGCCTTTCATCGTCTTAAGCTGCACAGACCAAATTACCGGCAAGCTCAAAAACTCCAAAATAAGTTAAGAACAATATACAGTTTTAAAAACCAACCAAAATAAGATGACGTCATTATCTCACTACGCACTCTTGACATTGGTCCTCTTAGTCACAGTAGATTACCTGGCCGGGAACGAACTGGAATTCTTAGAAGCTGAAGCCGACGGGGAGCCCTTCGAAGACAGTGACCTCATTCTCTCAGACTTTGACGACAAGCGAGGCTTTGCTGACAAGAGAGGCTTCGCAGACAAGCGAGGCTTTGCGGACAA…
Contig914 1603 reads, 407 bases	p3	(ACA)6acgaccaatacactagtggcctttacttcaacccatctggctacagcaacggat(ACA)5	87	275	361	GGTAATTMCGACAACAACAACCAATACAACAACAACCAGTACAACAATAACAACCAGTACGACAACAACAACCAGTATGACAACAACAACCAGTACAGCAACAACCAGTACAATGGCAAAAACCAGTATGGCAGCAACCAATACAATAACAGAAACCAATACAACGGCAACCAATACAACAACAACAACCAATACAACAACAACAACCAGTACGATGACAACAACCAATACAATGGCAACCAGTACGGCAGCTCAAACTACAACAATGGCGGCTACAACAACAACAACAACAACGACCAATACACTAGTGGCCTTTACTTCAACCCATCTGGCTACAGCAACGGATACAACAACAACAACAACTACAACAGCAACAACTACGATAATGCCGGATCATAC…
Contig9593 14 reads, 185 bases	p3	(TCA)5tctgagtcatctga(ATC)5	44	61	104	CTCAATCCTATGGTGGCTATCCCTCATCANCAATCATCMTCATCGTCRTCGTCGTCGTCGTCATCATCATCATCATCTGAGTCATCTGAATCATCATCATCATCGTCGTCGTCATCATCGTCATCATCATCTGACTCAAATTTGTGGTCAGGAATATCGTAGATCCTAACAGATCGGAAGAGCGG

## Sheet: tetra-rep
ID	SSR type	SSR	size	start	end	sequence
Contig1189 21 reads, 171 bases	p4	(GATA)7(GACA)34	164	7	170	CTACTGGATAGATAGATAGATAGATAGATAGATAGACAGACAGACAGACAGACAGACAGACAGACAGACAGACAGACAGACAGACAGACAGACAGACAGACAGACAGACAGACAGACAGACAGACAGACAGACAGACAGACAGACAGACAGACAGACAGACAGACAGACAG
Contig12099 28 reads, 262 bases	p4	(TATC)18	72	45	116	GGGTAATCCGCRCCCGTCAAATAACCCTGAGGCACATTGCCACATATCTATCTATCTATCTATCTATCTATCTATCTATCTATCTATCTATCTATCTATCTATCTATCTATCTATCTRTCTRTCTATCTATCTATCTCTCCCTGCTTTAGCATAACGAGCAGTATGCGGGGGAGGGCTTGTCACGGTTGCCGCTGCACTTAGTCAACATCAGTTCCGAAATTGGACATGTCTTAGTATTTCTGGAACATCTGTGTCCTCAKK
Contig13851 24 reads, 220 bases	p4	(CAAG)7	28	103	130	TACACTCTTTCCCTACACGACGCTCTTCCTAAATTGCCTGCWAAATTTCAGCTCGCTAGCTTACGAGVAAGTGGGTTAAAAATCGATCCAAAGTTTTGGCGACAAGCAAGCAAGCAAGCAAGCAAGCAAGGTCGGTCGGTCGGCCGCAGACACCACGAGTTAATATAAAGGATTTAAAAAGAATTATAAAAATATATAGATCTATTTATGGCACAGTTAC
Contig1596 1630 reads, 617 bases	p4	(AATA)6	24	555	578	GGGTAATGAACAGAGTACAGACGTTGGGCCATGTGTCAGATCCACTACGCCCTTGGGGACACTGGATTTAGTTACCTCATTGGATTTGGTGATAAATATCCACACAGCCCACATCACAGATCCAGCTCGTGTCCCAATCTGCCTGCTCCGTGTGGACCTTTTGTCATGTCAGGCAAAGAGCCCAACGTCCACATCCTTTACGGTGCCCTGGTTGGTGGACCTGGTCAGAGTGATGGTTATACAGACGACAGGTCAAACTACGTCAACAACGAGGTGGCCTGTGATTACAACGCTGCCTTCCAGTCGGCCGTTGCTGGTCTCAAGTCTTTGTACATCAGAAAGCTCCACCCAGAACAGAAGAACGACGCCGTGTGTCCGTACTCCGCTGGTACGGGTGGC…
Contig15981 102 reads, 193 bases	p4	(CCAG)6	24	169	192	GGGTAATTYGTCCAGCCAGCCTGTATTCACGTGTCAGTACATTTATTTGTCCAGCCAGCCTGTATTTACCTGTCAGTACATTTATTTGTCCAGCCAGCCTGTATTTACGTGTCAGTACATTTATTTGTCCAGCCAGACTGTATTTTACCTGTTAGTACATTTATTTGTCCAGCCAGCCAGCCAGCCAGCCAGC
Contig29651 114 reads, 643 bases	p4	(ATGG)10	40	34	73	GATGGATGGATGCATGGATGGATGGAATGAAAAATGGATGGATGGATGGATGGATGGATGGATGGATGGATGGATGATAGTGTCAGATCGACAAAAGTTCTTTTTTCTAAATGACGAAGATTAAAACAAAGAGATAAATTACTGTAATGTGGAAGGTCTTTTCTCTGAAGTTCATTTGAAATCCCGAACCTTGTGTAGTGGGCTCAGTGTAAGGGTAAGATGAAGTAGAGTCTGAATAATTGACACTTGAGTAGGTAGTTTCAGTTGGCAGGGTGCTGCTGAAACTTGTTGTCGAATCACACGAGGCTTTCCTTTTGAGATCTCCTTTAGCTCCTAAAACTTGTTCCTCGTGTCTGGGCGTGTACACACAAAAGAAAATGCCTGCTTCAGTGCATGAAG…
Contig3310 513 reads, 303 bases	p4	(ACAA)8	32	89	120	AAAAAAAATAGGGATAACAGGGTAATACATTGCTAGAAAACCTGATTCGTGTTGACGCTGTAGTCGTACATCTAAAACAAATAAACACACAAACAAACAAACAAACAAACAAACAAACAAATAAAGGGACACGTTTCCATTTGTTTACATGTTACCATGACGACACATTTCCAAAAAGCTGTCGTTGTTCTTGTCGTTGCTGTGTTTGGACTCAGCTCTTGTACTATTGCTGACCCCTACTGGCGAAACGTCTGTGGACGGGACTTCGCTGAGTGCGCACTGTGGTCTGAGAATGSATTTTTG
Contig35231 12 reads, 150 bases	p4	(GACT)7	28	16	43	CTCGCATAGCGTCAGGACTGACTGACTGACTGACTGACTGACTGCCACTTCTTGCGTGACAATTGCAAATTATATTGTTTAATATTTAGTACTAGCTGACCCGCGGCGTAGCATACGCCGCTAATGATTTAGTGACGGGTGAAGACTTCC
Contig7287 31 reads, 249 bases	p4	(ATCC)6t(TCCA)38	177	52	228	CATCGATCCTTACATCCTTCCATCCATCCATCCACCCAYCGCTATCCAGCTATCCATCCATCCATCCATCCATCCTTCCATCCATCCATCCATCCATCCATCCATCCATCCATCCATCCATCCATCCATCCATCCATCCATCCATCCATCCATCCATCCATCCATCCATCCATCCATCCATCCATCCATCCATCCATCCATCCATCCATCCATCCATCCATCCATCCATCAACCCATCCATCCATCCAT
Contig8073 480 reads, 599 bases	p4	(AAAT)7	28	90	117	TGAACATCATCTTGAATTAAATACATTTTATGTGCAATAGGATATCTTTGCATGAACAGGGGACTTTTTGAAAAGTCATCCATTATGTAAAATAAATAAATAAATAAATAAATAAATAGCATTATGCTGTACATAGCAAGAAGAACACAGGTTAATTTTTCTGAGATGTTTTCCTATATTGTCAAATTTGTGCAGTTTAGTCACATGGTGCACAATAGTGCAGCCTAGACACTTGGAGAACAGTGTTGAAGTCTAGAAACATGGTCACAGTGGTGCAGACTAGACACATGGTGCACAATGGTGCAACCTAGACACATGGTGCACAATGGTGCAGCCTAGACACATGGTGCACAATGGTGCAGCCAGACACATGGTGCACACAGCTGCAGCCTAAACACA…
Contig8367 84 reads, 170 bases	p4	(AAAC)6	24	97	120	CAGGGTAATTAGACTGATTGTGNATTNCTNCCAGGGTAATAGAAAACCTGATTCGTGTTGACGCTGTAGTCGTACATCTAAAACAAATAAACACATAAACAAACAAACAAACAAACAAACGAATAAAGGGACACGTTTCCATTTGTTTACATGTTACCATGACGACACAT
Contig8457 18 reads, 126 bases	p4	(ACAA)6	24	69	92	GGATAACAGGGTAATACAATGCTAGAAAACCTGATTCTTGTTGACGCTGTAGTCGTACAAATAAACACACAAACAAACAAACAAACAAACAAATAAAGGGACACGTTTCCATTTGTTTACATGTTA
Contig853 3442 reads, 659 bases	p4	(TTTG)6	24	519	542	TGTTATCCCTATTTTTTTTTTTTTTTTGATTAAACATAATTTTAATGTATAATAATAGGAGTTTTATTTTTAATTTTATTTTAAAATTGAACATTTCTGCATCAATCAAAGGTTGTAAAGTAGTTATCCAGCTCTTCTCATTGCTATTGCTAATGCACTCGCCATGTTTAGCTTGTCTAATAATCAGGTACGAGACCTGCGAGACCAGCATTCACAAATCCAGAGCCCCACAAAGTTATCAGTGTTGTAAGGTAGGCATCGTGTCCTATTCAGGAAGCAAAGACCTCGTCGAAAACCTAGCCCTTGGCACCATTGGGTGCACGTTATGGGGGTTCTAGGATTTCCATTCTCAGACCACAGTGCGCACTCAGCGAAGTCCCGTCCACAGACGTTTCGCCA…

## Sheet: penta-rep
ID	SSR type	SSR	size	start	end	sequence
Contig3512 47 reads, 178 bases	p5	(AACAC)5	25	78	102	CTCACTATAGGCTAGGGATAACAGGGTAATATCGTTCTGAGGCTGATTGTCTACTCCAACATCTGATTCTACAACAGAACACAACACAACACAACACAACACAACTAACAGACAATGTACAAGGCCGCTATTTTTGTTTTAACCTGTGTCTTGGCTGGTGGGAAGAGCGGTTCAGCAG
Contig37156 52 reads, 391 bases	p5	(ATCTT)5	25	246	270	TTTCAAATGATACTGACTGGCCTAAAATTGAGGATACTTCACAACAAACTAGTCGATAAAGGTCTTGATAGTCACCCATTAAACACTCATCTCAGACCACTTGACACTCAACAAATCTTTACAAGGACAACTACAACTTACATGTATTCACTTCAGACTTAAACCTAAGCTACAATTCCATTTGTTAAGGAAAACTGGGACAGAACATTGGCTCGTAGACCTTGTTAGAAGCAACATGTGTACACATCTTATCTTATCTTATCTTATCTTTTTACCGACGCTCCTTCTATACAGAAGATTATTGCGTCCTACGCTTACCTATGGGGGCGAGGGGAGAGATCCTTAGTAGCATCCACAGAAAACTTACCAGCRCCTGTGGGGTTTTTCGACT
