# Supplementary material for: Short read Illumina data for the de novo assembly of a non-model snail species transcriptome (Radix balthica, Basommatophora, Pulmonata), and a comparison of assembler performance
Source: BMC Genomics. 2011 Jun 16;12:317. doi: 10.1186/1471-2164-12-317 (PMC3128070; doi:10.1186/1471-2164-12-317)
Supplement: Additional file 7 — VELVET assembly contigs. [file 1471-2164-12-317-S7.ZIP]

Archive with 1 entries (1 files):
- Addtional file 7_Velvet_contigs.fas
