# Supplementary material for: Short read Illumina data for the de novo assembly of a non-model snail species transcriptome (Radix balthica, Basommatophora, Pulmonata), and a comparison of assembler performance
Source: BMC Genomics. 2011 Jun 16;12:317. doi: 10.1186/1471-2164-12-317 (PMC3128070; doi:10.1186/1471-2164-12-317)
Supplement: Additional file 7 — VELVET assembly contigs. [file 1471-2164-12-317-S7.ZIP › Addtional file 7_Velvet_contigs.fas]

>NODE_1_length_87_cov_3.862069
CACGCAGCTTGCCTGTTAGGAGGAAATTTTGTATGTTGCACTTAGCAGCCATCCTCACAT
TTAATATGTACCTGGGGAATGGATTTTCTAAAATTGTAAGAAGTCACATTGGGGGAG
>NODE_3_length_41_cov_11.219512
CCCCTCCCCCAATGTGACTTCTTACAATTTTAGAAAATCCATTCCCCAGGTACATATTAA
ATGTGAGGATG
>NODE_16_length_33_cov_140.666672
CAGGCTTCTGGTAATCACCTGTCTACTGACTCTCTACACTTTGTCAAAGGGTAATCCAAT
AAA
>NODE_60_length_50_cov_173.039993
TGTCCCTTTAGTGAATACCACTGCACAAAGGAACTTTGGTATTACAGCTGTAGTACACAA
TCAAGATCCTATACAACAAT
>NODE_109_length_105_cov_39.980953
TCCAAGCTGGTCACTTCCTGAGCTATGGCAGAGCCCAACAAGCAAGCGCCCGAGCCCAAC
CCTCCCCCGCAGGTCGTAGAGGCACCACCCCAATATGGGGCGCCTCCACAGCAGTATGGG
GCGCCCCCTCAGCAG
>NODE_110_length_97_cov_52.701031
AGGGCAAATTGGGCAGTTGCAGAATTGACAACCGGTTTCATTTGTCGTTTGGCTGACCTT
GCAGCCAGGGGGACACCTGAGCGGTGGACATCTGCACTGACATGTCGGGCAGTTCCACCT
GTCTCTC
>NODE_145_length_195_cov_56.989742
CATTTTGCTCTCATCAAGCACACCAATGCGGACAAGACGGCGGAGGAGAGCATTACCCTC
GAAAAGTCGCTTTTGGTCCTTTTCGTCAAGTGTTAGGAGATCTCTTGCAGCTTTCCTAAT
TTTTCCCAAAGTATATTTCACCCTCCATACTTCTCGTTTGTTGCGAAGACCATACTCTCC
AATAAGTTTCAACTCTTGATCAAGAGATCGGAAGAGCGTCGTGTA
>NODE_254_length_69_cov_4.405797
TGGGAGGTTCGATATCACTCGGACAATGTAGAAGAACGACAGTACAAGCAGGGTAATTGG
TATAAATCTGATAAGGGTCCTCGCGTTCGGCTCACGGAG
>NODE_255_length_96_cov_4.156250
TGCCTGAGAGCTTCTTCTTCGCTTAGGCCTACCTCCGTGTCACATACCCCAGGCCCATCA
ACGACCTTCAAGGTGGATCCGTCTACAAGTGAGAACTCGTACTGCATCACTTTGGTTAGG
GAGTTG
>NODE_334_length_40_cov_23.475000
TCAACACTTTCTGCATCTGCTGGTTCAAAAGTATAATGTTTTATCTCTGGTTCTAAGGCT
GGGTCTCCTC
>NODE_335_length_31_cov_44.870968
TTATCTCTGGTTCTAAGGCTGGGTCTCCTCCTTTCTCCAAATACAAGTTATTAAATGGGT
A
>NODE_338_length_32_cov_58.625000
AGATGATGACATAATAGGTGAAGATCTGTGGGGTTCTAATGCTAATGAAAGATTCACCTA
TG
>NODE_340_length_38_cov_7.342105
ACCTATGGTCAAGTTGTAACTTTCGTTTTATTGATTTTTGGAGGATTTTTTGCTGCATGG
AAAATTTT
>NODE_347_length_181_cov_2.348066
ACCAAATATTCACATACATTTGTCATTAAATAAACGTGTGTATTAAAACTTAAAGCTGAT
TAAAATTTCAGATCATGTTCAACACAATCTCTTCCTCCAACTCAAGGGCAAACAAAATGA
AACACTCGCTGACACACAAACCAGGCGCAATACTCCACTTGTGTTTGAAGTAAAAACATT
TATTATTGTACTAACGGATGTCTTTCAATCT
>NODE_348_length_200_cov_1.795000
ATACAATCTTAGATCATACCGTCCAGTGACGTAGCAAGGATTATTGCGCATGCCAAGACT
TGTTACTTCTTGAATTATAAAAAAAAATAAAAATTATTAACCAGTCGGCCTCCGTTATTA
GAGAAACAATGTCCTTGCAGTCGTCCCTGCGCTAGGCGATAATTGACCAAAAGGATGGAA
TTCATGAAGATTGAAAGACATCCGTTAGTACAATAATAAATGTTTTTACT
>NODE_360_length_73_cov_2.863014
GGGTAATGTAGGTGCCGAAAACTTCCGCCATTCAGTGCGTGGTCAATGCACCCGATGACT
TGTGGTAAGACTTCGCGGTATTAGTCCCTTTCTCTTAACTACC
>NODE_361_length_140_cov_2.478571
GACTTGCACACAAATTTATGAGAATAAACATCACTAGACTAATCGCAAGAACTTATCCCT
CACATTAATAATTAATATCCTTCATATAAAATTTGACAAGGGCTTTCTTTTACCCTAGCC
CAATGCGGCATCCTTTCGCTTGTCAACAGCAGAAACGATTTCAAGAACAA
>NODE_363_length_36_cov_86.000000
GTACAAGATACTTCTAGTTTTCCTCATCGTCGCTGTGATGGGACTACATGCATGGCCTGA
TCCATT
>NODE_373_length_44_cov_170.931824
GTATTGTGACATGATCAAGGCTGCCATCACCAGTCTCAAAGAACACGGAGGCTCATCCCG
CCAAGCTATCCTCA
>NODE_391_length_83_cov_64.325302
AGTTCGTCATCAACCGTGAACGCAGGCATTCCGTGGCCAAGGCGGAGTGCGAGCATCACG
GGGGGACACTGGCCATCGTCAGCTCCCCAGACATCCAAGGTTTCATTTACAAC
>NODE_422_length_55_cov_133.727280
CAGCCAACTCACCAGCCAACTCACCAGCCAGCTGACATAAACGCAGTGGCAGTCTCTACC
TTCACCAAACTGGACGCCGATGGTG
>NODE_549_length_37_cov_125.243240
TCATGTTGGAGTTAAGCATATCTTCAAATTTGTCTGGTTCGATGTGAGGTACCCCAGTGA
CAAGGTC
>NODE_551_length_98_cov_71.622452
AGAGAATTCTTCTCATTGGTTGAAAGATAATCTGGCGCATGTTATACAATTTGTTGATGA
TGTATTGGCTGGCAAAATACCATCTGACAATGTCACTGGTAGGTTTCTTCTGGACCTTGT
CACTGGGG
>NODE_553_length_141_cov_56.375885
TTCTACTGTGTCCACCCTGCCGTCTTTGCCTTTCCCCTTGCCGTCAGCGGTAAATCTCTC
CTTGTGGGACCCAGTGTAGCCAGAGGCGTCAGTGAGGCGGGCAGTTGTTGCATCCACTTT
CTGGGCTTTGACTTTAGATTCCCCAGCCTTGGCGGCCAGCTTGTTCTGAAT
>NODE_554_length_111_cov_49.198196
AATTGTTGGGTCACGAGTTGTGTTCTCCTGTCAGTGAGTTCCTGAAATGTGTCTGTGTCA
AACCCCATGTCAGTTACAAGACTAGCGAATAATTCCAAGAGGTCAGCATCTGATTTGTTG
TGAAAGTTGACGTCACGCAGT
>NODE_619_length_175_cov_47.234287
AAATTGAACTGCTATAATGGTATCTACAGAATTTTTTTGATCCTCTCAATGGTTTAACAT
ACATAACAAGGACTTTATCAGTCATCTCGAATACTTTAATTAATATTCTTCTTCCCCCTC
AGTGGGTTCAATTTCAGTGGAGTCCACTCCTACTTCTTCGTAGTCTTTCTCTAGAGCTGC
CAAATCTTCACGGGCTTCAGAGAAC
>NODE_620_length_60_cov_17.166666
GCTGCCAAATCTTCACGGGCTTCAGAGAACTCTCCTACTTCTTCGTAGTCTTTCTCTAGG
GCTGCCAAATCTTCACGGGCTTCAGAGAAC
>NODE_678_length_699_cov_16.032904
GCCACTGATGAATCAGTCAGTCAGTCAAGTAAGTCCGTGAGAGCATTGCATATTATTAGT
ATAGATATAAATATAACATGTATATTTTGGCATTATTTACAATTTTCTGGGGTCAGCGTT
AGGGTCAGAGCCTGGGGTCAGCGTTAGGGTCAGTGGCCGGGGCAGGGTTAGCCAGACCCA
ACATGACCAGCCCAGCAAAGCTTGTCCACTTCTGGAAGTAGGCGAGTCCATAGCCAGAGA
TTAGGACGTGTAATATGTCACCAGCTTCAAGTTCAAAAGTTCCTCCGACGTAACTTGTCT
CCTCGTCCNGGTCGGGTCGTTTCGAACAGGTGAAGACCTTCATCCGCTCAGGTATCGGTC
TCTAATCCTGCACATTATACAGTGGTCGAAGTTCAAGTTTTCAAGGAGGCTGCATTGAAC
AGAGGAGCAGGTAGCATGTGAGCAGTGTCGTCCACACCTGACAGAAATCCTATGTAGGCC
AGGACCGCCCCAGCAATCCACTCTAGAAAACTTGTTTCACGTTGGTGCAGACCACAACTT
TCAGAAACGTTCCCACTCTGCTGAGACCAGACTTCACATACGACGACATGTGTTTCATTT
CTGGCCTCACTTGCTAAGAGTTTGGTAGCCCGTCGTGGAGCTGGGGTGCGAGTACAAGGT
GGTCCCCCAGTCCGCTCCGGAACAGCACAAACTTTTCGTCCATCTGGCTCAGCAACAGTT
TCGCCCCTT
>NODE_679_length_48_cov_79.270836
GACTTGACCCTTGGCGACCAGTGCGGTCAGATATTTAAGGACATTCTTGCTGAGGCAAAC
ACTGCCCCCTGGGGCGCC
>NODE_682_length_81_cov_220.629623
TGACCTCCAGGCGTGCATCACCACCAAGTACGACTTCAGCAAGGAGCTGCTGGTCAAGAC
GATGCAGCAGGTCACGTGCGAGAGTGCCCACATCGGATTACAGTGCGCCTA
>NODE_683_length_43_cov_40.790699
ACAACAACTACAACAACAAAACCAAGACGCATCCCGAACAATCAAAAGCCTCCGACAAAC
CAAGAGCTAGATA
>NODE_684_length_49_cov_34.959183
AAAAGCCTCCGACAAACCAAGAGCTAGATAAACAGGCCATATATGATATTATTTCCGGAA
AAAGGTGTACGCCTAATGC
>NODE_685_length_105_cov_15.742857
CCAGGCCTCCGTAACACCGGTGGCCGAGGTGAGAAGCGCCAGGGATTGTGCCAACCTGTG
CGCCCTGGGTGAACGCCTTCCCTCGTGCGCATCCTTTACTCTGTGTGGCGATGAGAGGGA
TAGGCAGTGCGCGCT
>NODE_747_length_142_cov_97.352112
GTGTTGGCTGATTCTCATCTAATGCTTTCCCACAAGAATAAACTAGCCGTCATAGCTGCT
CACACAGACCACAGTGTGTTTCTCTACCCTCGCCCTCAGTCTGAAAAAGGTTTGGCAGTG
AAGTTGCCTGATGATGGACAGTATGAAGTGTTCAGTCAAGTGGAAGGACAAC
>NODE_760_length_71_cov_2.084507
CCCTAAGCAAACCACCTGTCGGCTTGATTTTTAAAAAATGAATTCTATACACTTTAACAT
TAGCAGTAGCTTTGTCAAATGCAAGAAATTTTTAAAAAAAA
>NODE_761_length_142_cov_11.704226
TTTCCCCGGGCACACGGAGACACCTGGCTCCGTCAACGGTCGAGCTTTTGTCTTCCCGCC
AGCTCCCTTCTTATCACAGCCCCAAGATGCGCATGTCCCATGCTCACGTGACCAGTGTGG
TGATGAGAAGATCTGCCACTGCCCCCACATCATCTCCTACTCACGTGACGAC
>NODE_767_length_31_cov_15.870968
TTAAATACATGCACAGCAATCACAGTTGATGGTAACATAGCTAACTGCTTTGGTGTAACT
A
>NODE_777_length_34_cov_196.735291
AGCAGCCCGTCGTCACGGACTTTGAGACAATCCTTGGCGTGGAGATAGCTCCTTACTGTG
GAGC
>NODE_806_length_187_cov_2.459893
AGAATTTGATGTAGACAATGAGTGCGCCATATACAAGTGCTGCGCCGATAATGCCGAGAA
TAATTGGAACTGTTCCGTTTTCGATAACTTTGGTATGTACAAGAACGATGGGGACAGCGA
ATCCAGTGCAGAGTAGTAAACCAGTTAAGAATAATGATGCATCTTTCCAACCACGTGACT
CAGTTCCATCGAATGAGATTCCCCCGCCATCCATGTT
>NODE_881_length_31_cov_120.129036
AAAATAGGGATAACAGGGTAATGTAAAGAAACAATGGCGACGAGTCAAAGGAGTCTCAAG
A
>NODE_966_length_179_cov_15.787709
TGCGGCTCTTGCGACTCTTTCTCAGAGCACCCTTCTGGGCCTTGGTCTTCTTGGTGTGGA
GGCCAGCCTTCTTTGCGACTTTCACAGCAGCTCTGATCTCCTTCAGCTCGGCACTGACCT
TGGATCTGGCGGCGTCGTCGAGGGTCTTGTATCCAGCACGGTAGGCCTTGCGAGAGACAT
ACTTGCTAGGACGGGGCAGTTTAGATGGC
>NODE_967_length_157_cov_27.554140
CGGCTGCAGACTTCCACATCATTGGTCACAGTCTTGGTTCACATATTTCTGGTTATGCTG
GTGAGAGGATTCCAGGCCTGGGCAGAATAACAGGTCTTGACCCCGCTGGTCCATATTTTG
AGAATACCGATCCAGTAGTAAGACTTGACCCCTCTGATGCTGTCTTTGTTGACGCCATAC
ACTCTGA
>NODE_981_length_79_cov_7.620253
CGACAGGTTCAACTGGACACGAGAAATCGTCAAAAGATAATATGCAGAAGAAGCCGCCTT
TGCACCAACGGGAGGCAACATTGTTGTGATTCGGTCATTCAGTGAAAAC
>NODE_983_length_102_cov_100.833336
GTATTTAAATGTCCTGGTGATCATGTGATCGCTGGCGTCAACAGTTACCATGAAAACAAG
CATGAGGATCGCAGGTTCGCCTTTCAGTGCTGCAACGTCCAAGGTCGTAAGCCACGTGAC
TGCTACATCACT
>NODE_1095_length_50_cov_332.119995
GCTCTGGTCACCACGTTGTTTCTGTTTCCGTCGGCGCGGCCGAAGATGACATCAAGGTCG
TGGTGGCTGATGCGACCGTC
>NODE_1096_length_136_cov_94.941177
AATAAACCATCAAAATGAGATACCTCTTGGGAGTCGCTCTGCTAAACTTTTTCCTAGCGG
GTACTAACGGTCAACTCACGGCCTCTGAATCCGTCGGGTCCGTCTTCTTATTCAGCACAC
CGATCTACTGCAACGCCTTGGTGCCACAACTACAGACCTGCCCACC
>NODE_1113_length_197_cov_149.771576
GCGGAGTACTCGTTGTCAATGTGACCCCAGATGGAGGCAACGTAGTTGTAGTTTTGGTGG
AGCTCCAGCCACATGTTGCCACTGCTGTGTGAGAGGGCCTGGAACTGGAAGACGTAGAGT
CCTGCCGTGGGACATGTAAAAATTCCAGTTTTGATGTCATAGGCTCCTCCCACATTGGCG
AAGACCGTGTCGTAGATGACCTTCTGAGATCGGAAGAGCGGTTCAGC
>NODE_1218_length_263_cov_10.520912
CGCCTCTCTCTGGAATCTTTACTTCCGTAGATCGTCAAGAACTTGTTCCCGTGGGACGAC
GAGAGACAACTCCAGCGGGTACCGATGTTGTCTTTTCTTGAGGAAATCCCTTTGATCGCT
CCGGGGAGTCGTGCAGCGAGAATTTCCTCAAGTGTCTAGAACATTCTCCGAGTGAGTACG
TCCGTGCTGAGCTCGTCTGGAGGGNGATCCTAACTTCTACAAACGAGAATCGGTATGTGT
CTATGTGTTCTCGTCCTGGCCAGAATCGCTAACGCCCCGGGATACGTAATGGG
>NODE_1237_length_84_cov_99.892860
AGCAGCTGCCGCCTGGCTGGAGACGGGTTTCAGATAATATATGACGTCATTGAATTGTTC
AATACCATCTTCTGGTGTCGGATCCCGACTTTTGTAATCATCCCACGAAGATCT
>NODE_1250_length_36_cov_154.027771
ATAGACATCGCTGGAGACTTGGAGGAAACTTTTTGCAACAGTTAACATCTTCTTTTGGCT
TTCAGG
>NODE_1254_length_525_cov_11.272381
AAAAGTACAAGTTTAAAAAAAAAAATATATACAAAATAATTAAAATGCAATTTCTTTAGG
ATTTAACCATTTAAAAACACTGAATACTAAAGACTCAAAGAGTTAAACCTGGCAAGTTGA
AATACGTGGTTAGGTGTAAAGTGTTCTTCGTGTTGGCGTAGTCACACCAAAGAGGTTGGT
CCTCACTGTTGCCGGGGATGGATTAGCCATTTGGATCGGACTACTGTTACGGATATTGTT
GTACAATGGATGGACGGAAGGACTGTTCAAGTAATCTATCTCTGGCAACCTAGGAAGGNC
ACACAACTATACACTCTCACCCGGCTGCCTCTTAGTGTCTAATCTAGATATAGGTTCAAC
AAAAGTATCAGTAGTAGGGTTCGACTCAAGACATTGTGTTCCAGACAATCCCGTAGTAAT
AATTTACTGTGCCCCTAAAGATTCATCAACTCGAGTCTTAATAGGTAAAAGTTCACTGAC
ACTGAAAATCCTCGGCCCCTGGGTATCAGACTAGCGTATCCTCATATCAGGGAAACTTTA
CTTCCTCTTATGAGG
>NODE_1396_length_34_cov_139.411758
AAGAGAAGTCGCTCTAGCAGTCCTAGACGTGGGTCGACGATCTCATACGAACCTGTGGAG
GGAG
>NODE_1397_length_57_cov_90.824562
CGACGATCTCATACGAACCTGTGGAGGGAGGAGTGAGGATAGACGTTTACGTGGCCGTCA
CTCTGTTCGCCATGGCCATCGTCTTCA
>NODE_1398_length_68_cov_45.352940
ATGCTTGGGAAGTACTTCAGACGTGTCCTGAGATTCAGTGTTTGGGAAGTACTTGAGACG
TGCCTTGAGATTCAGTACTTGGGAAGTAGTTTAATGAA
>NODE_1407_length_40_cov_129.074997
AAAATCTGTCCTTGCCAAGAAGCAAAACCGGCTCTTGAAGCTTAACACGAAGGATTTCAG
GCTCCATCTG
>NODE_1491_length_88_cov_70.511360
CGCCCAAGGCAATCTGGGTGACCTCGTCCACAAGGAAGTAGAGGCTCTGCTGGCCATCTA
TCCTGGCCTGACGGTTGCTGAGTGCGCGGTCAAATGTGACGCCCTGTTTGATCTGAAC
>NODE_1492_length_141_cov_20.106382
GTCAAATGTGACGCCCTGTTTGATCTGAACGACGATGCCTACGAGGCACACACTGATGAG
CTGTGTCTACATGCTTGTGAATGTGAAATCTTAAACAACTGTGAGGATCACACCCATCCT
GACCATCCACCCCATCCTACCCACCCCGAGATCGGAAGAGCGTCGTGTAGG
>NODE_1502_length_48_cov_317.458344
CGCTTAAGCACCGAGGAGGAATCACGGCAGCCGACACATTAAAATGATGACATGTGTTTC
TATGTGTATCAATTTGGT
>NODE_1521_length_55_cov_291.345459
CGTTCCCTTATTGTATTGTATAACTGGGACACTTTGAGAGGGTACCAAATTGATACACAT
AGAAACACATGTCATCATTTTAATG
>NODE_1522_length_65_cov_131.184616
TGTTATATCACCAGACGAGAAAACCCATAGCGATTCATCTCGTAGGAAAACGGGGCACTT
TTAACTTCGACCTAGAAGTAGAATGGCGCCCATTT
>NODE_1534_length_49_cov_74.918365
AAAGGGCTCCTTCTTTTCTTTTAGTTTGAGCAGTCAGAAAAGCCTCTAATTGGGTCATAT
CCATGTCAGCTGATACCAA
>NODE_1537_length_42_cov_193.047623
TTTTTCTACCCGTTAGATTTTACTTTTGTTTGTCCAACTGAAATCATCTCGTTCAGTGAC
CGTGTTGCAGAC
>NODE_1538_length_45_cov_213.133331
TGACGCTTGCTCGAACATAGTTTGTTTAAATAGTGGGACGTGTGTCGTGTACCCAGCACT
GCAGACAACGAAGTG
>NODE_1547_length_73_cov_135.095886
ACAAGTATATGCTGAGTAGTCTGCCTCAGCAATACAGGTTCCTCCGTTTTGACATGGCAG
GTTAGTGCATGGATTGATTCTTGAACCACAGTCATCGCCTTGC
>NODE_1657_length_86_cov_16.488373
CCTATTTTTTTTTTTTTTTTTGAAAGATTTGTAAAATAATTTATTTGTAATCAAGATCCC
CGAATGTGAAATAAAAAAGAGTAAAGAACGCCGTACTTTGTCATGGCGACAAGAAG
>NODE_1660_length_78_cov_117.051285
TGCTTAAAGAAATTTGAATTTGAAATCAGCAGTTGTTGGCTGGGATTTTGTTGAAGTATT
TGGTGTCTATCCCGTATCGTTTCATGTTGTACTTTTGGAATTCGAGGC
>NODE_1720_length_68_cov_49.602940
ACCCTCCAGTTCCACCAATCTGACGTGTCACAGGAACTACTACCTTGACGTCACACAGCA
CACCTGCTCCCGGTGCCCGACCTGCACGTTCCTTGACC
>NODE_1721_length_95_cov_24.294737
CCTTCTGACGGATGTGCTCCCTGACCTGCGGCACGGTGGCGCAGACGGCGTTTCCGCACA
TGTTCATGCCCCCGGTGTTGCTGTTGCCCTCGCCGTCCACCCCGAAGAACGCCGCGGTGG
CCATG
>NODE_1722_length_59_cov_104.440681
TCCACACCTACGCCACGACGGCCGCCATCAGGACCCAGATCACCAACGCCTACAACGCCG
CCAAGCAGCACGCCACCTGGCAGCTCAAC
>NODE_1736_length_42_cov_160.214279
CAGTAACAGGTGGTGCATGGCCCCTTGTCATAGATGTCACCAGGCTTGTATGTGATGCCT
TGGTATACACAC
>NODE_1789_length_197_cov_4.578680
TTTAAACACATTTTTTTAGATTAATGTTCATTCATGTTTTGAAAAATCATATATATTATA
TATCAGCAATTAAGATAACAACTATATCAAACTTCCGTGAATATCAGTCAGCAGATTGCC
TGCATCTTACTGCCGTCACATCCTTTAACTGGAACTCAAACTGCCCGCCACTCGTTTGGC
TCTCGATGTAATTTGTGATGGGCAAAGCATCTTCCATGACAGTTGTA
>NODE_1897_length_38_cov_66.000000
TAATCTTATTTTCAAGGACAGAAAGCTCAATATTGGCCCAGCAGTGAGAAAACAAGGTTT
ACCTCGCC
>NODE_1903_length_49_cov_30.918367
AGCTTTGGCACGGTCTGGAATGAAGATTGGTCGTATTGAGGATGTTACTCCCATTCCATC
TGACAGTACCAGAAGAAAG
>NODE_1919_length_156_cov_18.756411
ATCTCCATTCTCGTAATCGATGCCATCAACTGTGCAGGACCAGGAATGAATGTAGGCGGC
GTTAGCAGCAGCCACCACGACTGAGCCAATCAGAAACAACGCAATCCAAGATTTCATTGT
AATGAGTTTCTTTCTTTCTTACAGCGGCCAAGAAAGAAAAATTACCCTGTTAAGATCGGA
AGAGCG
>NODE_2009_length_31_cov_22.258064
GGAGTAGGCGATGCGATATCGTAAGGCCTGCCTATAGAGTTGTCCTTCCTTGTCTAACTT
C
>NODE_2039_length_31_cov_1.193548
ACCTCTTTGTACAATTTGTCATAAGTGGCCATGTCAAAAAGGATCAAATTGTTAAGCTTA
T
>NODE_2041_length_62_cov_116.774193
AGCCAGCAAGACAACGGTTGGTAAGCCCAAGAAGGAGGGTTCAGGTGGTAAAGCCAAAAA
GAAGAAGTGGTCCAAAGGAAAAGTAAGAGATA
>NODE_2065_length_45_cov_97.111115
AGACTAGTTCCAAGAAAATCTTGCACACTTGTCTGATGCCACTGACATGCAAGCAGCACT
CCATCATTTCAGAAA
>NODE_2066_length_94_cov_15.478724
CTTGGCCTGCTCCTCATCATCACCATCATCATGTGCTGCCTCTTGGCGAGACAGAGGGCG
AGCGAAAAGCGGCGCCCTGAGTACGACAGCATTGGAAACTGCTCTTCCTATCAAAAAGAC
TACA
>NODE_2074_length_219_cov_3.817352
TTTTGATTTAATTAATTGATTTATTAAATGGACCGACTGATTTCCTATCAACTCACTGAG
TTCAATTTTCCTCTTCAGACTCTTGTTGTTGTTGTTCTTCGTCGTCGTCTTGAGGAATCT
TGGAGTCGTCATGAATTTGAAGNGTAGTTTCTGCCGCAGTATCGCTAGGACCCACTCCCA
GAACTGTTTGAACACAACTGAACTCCGTCCTTGCAACTACTGGAAAGACCACAACCGTTG
CCTAATGGG
>NODE_2184_length_481_cov_12.773389
TGCTTATTACAACTTACCAAGAGATTAATACCACTATCTCGTCCAGCCCGTTGCTAGAAT
GACCAATCCAAAGGGTTATCGCCGTGGTACGCGCCATTTGTTCTCGCGTGACTTCAAGAA
GAATGGTCGCATCCCGCTGGCTACCTACATGAAGATCTACAAGCGCGGTGACATCGTCGA
TATCAAAGGCAATGGCGCTGTGCAAAAGGGTATGCCGCATCGATTCTACCACGGTAAAAC
AGGTCGTGTGTTCAACGTCACTCGACATGCCGTCGNGTTTTCCCATACGGCGTAGCTAAG
ATGGTGCCATTTTGTCCAGCACACAAGTTGCAGTGAGCTGTACGGCAGCCATAGTAGCAG
TTGTTCGCACAAGCAGTGGCACAGTAGCGGTTTGCGTAGTTGCACGCGTAGCTCGTATAA
TTTGTGAGCTTTACGGCTAGCCTGAAAGAGTTGGCGCAGTTCGTCTCGCTTGTCAACTTT
GCGCGGCGCTTCCTCAGCCCGTTCGGTCACG
>NODE_2279_length_32_cov_32.500000
AAAATAGGGATAACAGGGTAATAAACAATCCTGGATACAATGGTAACCCTGGCAACAACG
GA
>NODE_2280_length_84_cov_1.821429
CTGTTATTTAAATCACGCAAACATTTTTAGGAATTATTTATTTCCTGACAACCAAACTTT
TTTTAAATTAGTTCATAAGTCTTGTCTGCATTTATCTGTGACATGATATTTATA
>NODE_2282_length_31_cov_180.225800
AAAACAGCGATAGTCTCCACTGTCGCTAAAGGCTACGTTCTTTATCCGAAATCTTCGTCC
A
>NODE_2284_length_89_cov_82.842697
GCCATTGTTGATGAATATGATAGAGATAACGTTGTCCGAGGACGCCCTTGGCTGGTGTAT
AGGAGTCCCAATGTTACGGTGGTACGGGGTAAGACTCTAATACTGGAATGTGTCTTCCA
>NODE_2352_length_44_cov_55.136364
AGATTACGCTGTGGCTCAAATACACATAGGACCGATAGGTGGTCAACAGGCTCCGATATG
CTACAGTTGTGACA
>NODE_2353_length_47_cov_188.021271
CAAGCAAGGGAACACCCATGTACATGCAGCTGGTAGGATCTCATTGTCACTAAAGCTGAT
CCACTGTTGAATCAATG
>NODE_2384_length_51_cov_124.549019
CCACTTAAACTCCAGATGGAACGTTTTGCTGTCTCTCATATGCAGAGACTGCCATGCCTT
CACAGCTCCAATATCTTATTG
>NODE_2443_length_484_cov_2.966942
AAATAGGGATAACAGGGTAATATAACCACCCACACAAGTTCAACTCAGTACACATTCGTA
AGCAGAATACCGTTGCTCTCTCACCATGGCCCGTCGTAGCAGCCAGAAACGCCGTCGTGA
CCCAAACGCGCCGAAGAAAGGCAAATCGGCCTACCAGATGTTCATCGCCGATAATCGAGA
CGATGTTGCGCAAAAGCATCCCGATATGAACAGCCGAGAAGTTCTGAAGAAGCTCAGCGA
GATGTGGCGTCAATGCGATGATCAGACGAAACGTCGATATCAGAAGCAGCNGCTACTAGT
CTGCTTTGCAGCTATAGTCTTCGTCGTTGTCAGCCCAGTTCGACTTATACTCCTCTTTGA
CCGGCGCATGTTTCTCCTCGCGTTCTTGTTCGCTAGAGTTAGCAGCTTTAGCTTTAGCTG
CTTCTTGTTGTTGTTGCTGTTAAGGTTGTCAGTTAGCTTTTTCCTCTTAATGTTGCTTTC
GTTGCTGCTGTTGTTATTAGTCCGCACTACCGGC
>NODE_2453_length_51_cov_4.627451
AGTAGAGGAGTAGCGAGAATCATGACTCGAAGTAATATAAAAAACTTGTTTAGACATTGA
TGGAACTGGATGAGAGCAAGA
>NODE_2454_length_31_cov_4.612903
AGACATTGATGGAACTGGATGAGAGCAAGACCTGACACACCTCATCCAATGTGGCACAAT
A
>NODE_2455_length_218_cov_6.495413
AATCTGGTGTTAGTGGTGACACCATTGTAAGAGTTATGTCCCCTATAAAAGCCTATGTTG
ATCTCATGAAGACAGTATTCACTAGTTTCCCTGTAGCACTGGGTTATATGACGTGACCAT
CTGAGTGTAACACCAGCAGGTCAGGTCATCATTGGATTGACACATGACTGGATATTGTAT
TGTGCNATATAATGAAGCTCTGTACTAAGAGCGATGATGAGATGACATATATATTTACAA
GGATGATG
>NODE_2489_length_103_cov_38.398060
ATAGGGATAACAGGGTAATATTTTCTGTCTCTGACCATGTCCTTTGATCTTTCTGCTGCA
ACCTGGAGGAAGCTGCCCCAAGATCCTATTAGGCCCAAATATGCCACATCAAACTCGATC
CAGTTCTGGGCTC
>NODE_2490_length_31_cov_166.322586
ATTACGGATGTCAACACGAAGAAGTCGAGTTAACATCACACCCACTAGAGTTGGTAAACG
G
>NODE_2492_length_84_cov_9.047619
GGTAGACATGCCAGTAACTTTCAATACAACATGTATATAGCAGAAATGAACACTGAATTC
AATGGCCAGGAACACATTATAACCAACACAATTTGAGCCACATCAAAAGATCGG
>NODE_2495_length_78_cov_9.923077
CTTGTCTGCAAGAAAACTGTTCTTCGGAACCGCAGTCCGACTCTATGAGATATATTCATC
AGTTAAATTCTGAGACCTACTCTAAGCGGAGTCTCCGGTCCAGAACTG
>NODE_2510_length_129_cov_68.682167
ATAGGCTAGGGATAACAGGGTAATATCTCTCAAGTCATTAGCCACAAAGTGAGAAGCAGA
TAATCAAATGTCCAGAATAGCTGTGATTGGTGCAGGGGCCATTGGACTCTCTTCTGCAGT
CAACATCCAGAAGTTGCTGTCGAATGCCAAAGTTACAAT
>NODE_2511_length_98_cov_7.642857
TTTCAGTGACGACGCCCTATGAACCTCTATTTAAAACAACGCTCAGAAACACACTGGGGT
GATGTGAGCAGTGTCCAGCTACTAACTTTTGCTTTTATAAACTAGCGTCAGGTCAATGCC
AGGCTTGG
>NODE_2517_length_45_cov_7.155556
GCGGCGCTACTACCTATCGGCAGACACCAACGTGCTGGTGACAGAAGACGCAGAGGCCAT
GTGTGAAATATTCGG
>NODE_2519_length_48_cov_42.833332
GACGCAGAGGCCATGTGTGAAATATTCGGAGGTTACCTTGTCGAGATAGACAGTGCTGAG
GAATATCACTTCATTGTA
>NODE_2520_length_358_cov_2.986033
GGAGAATTTAGCTTGTATACAAATATATAATTTTAAAATGTCTGAAGGTATTTAGTTACT
TACTATACAACGAACTACCATGGTGTTTACATTCCAATAACATCATTTAGTGGAATGAAT
GCACGAACTGGGGCGCTGGAGCAAGTACACTCAGAGCTCTCTTTCTGGGTAGTGTGAGGT
CGATTATGGACTACAGCATGCCCGTCCAAGCCTTTGCCAGCAAAACGCCATTGGAAAAAC
TGGGTCGAATCCAGAACCAGGCCTTAAGATTTATCTNCTATAAGCATCCCTGTTCCGTTA
GTATTGCTGACGTCTCTCCATGGCGTCCAATCTGAAATCCCTCGGGACGATGGTCTACGT
CGTGTTGACCCCGCCTGCACCCACAAAC
>NODE_2525_length_44_cov_277.454559
ACAAGCTGATCCTCCTCGCACTTCTCGTCGCCGCAGTGGCCGCCCAGGACCCGGCCGCCC
GGAAGGCCCACATC
>NODE_2535_length_31_cov_93.516129
CAGTCACAATGCGCTCTACCTCCTCTTCTGTCAACTCTCCAGCCCTCTTTCTGATATCCA
C
>NODE_2538_length_112_cov_1.196429
CAAAAGCTTTTGAATGGACCAGCCAAACCTATATCCACTCCAAAGGGTGTTAAGATTGTA
AAAAGTTCTTCCCAGGCGTTGAATAGCACAAGTCAAGCTGTTAAAGAAGAGCCAATGGAG
ATCGGAAGAGCGTCGTGTAGGG
>NODE_2541_length_68_cov_54.382355
ACCACAGATCCATCTGGCCATCATCTATTTTAAAAGTCTCATCATAACCTTTAACTTTCA
CCCACTCAATAGTTAGACCTCTTAAGACCACAATGGCC
>NODE_2550_length_121_cov_2.479339
GTTTAGCTTCGCAAGGGCTATGTCGTCGGCAAACGAGGTAGGATTGTAGCTTTCATGGAG
CACCGCGACTTTCAGAGTTCTCTCCTGAGAAAAGGGATTGTTCTCATCACCGAAAAGTTT
CAGGGACCCTAGCACGGCGACGGATTTGTTG
>NODE_2551_length_173_cov_9.236994
GTTTGAAAAGCGTTTGCACAGAAATTTGGAGAACAACCAGGCAGACGATGATTGACGTCA
CAGCGAAGGCTAAAACAATTCTTCTATACGTATCACTGGATGNGCACCAAGTAGAGTAAG
TCCCTTTCGAACGTCAAGCACCTCTCACCTATAATCAGGGGAAACAACATGCTTGCAACC
AGCAAACTACCGCGGTGACTTTG
>NODE_2560_length_174_cov_15.091954
CTGGTATCAGAATTGGTGGAGTTAAATACGTCGCTACTACTTTTGACCAGGACGAGAACG
CCGCTTACCTCAAGAGCGACAATGGAGGTGCTTGCGCTGTTAGAACTAACAAGTGCATCC
TGATCGGCACCTATGACACTAAGGCCAACCCAGCCCAGACTTCTGGAAACTGCAACAACA
ACGTCGCCAAGCTCGCTAAGACTT
>NODE_2574_length_33_cov_160.606064
AAAACTTTGTGTTCCTGATAGATGCCTCCGGTGTATTTCTCGAGTCCGTCTGTAGCGTCA
ATG
>NODE_2600_length_36_cov_42.388889
TAGTAACTGGGTATGTACGCCTCACACAGGCCTGTCACTGGCGCCAGACTGCACAAGTCC
GGTCTT
>NODE_2603_length_59_cov_11.915255
TCAGGCAGACACTGAAGAGAAAGACACAACTCAATTTAAACAGCATATTGTATTGATTGA
CTTGCTACTGTCACAGATCTAGTGGCAAA
>NODE_2632_length_80_cov_6.137500
TTTTTTACAGCTGCTTCTGATAGGCGGCTCCTCATAGTCATTAACCTCTCTGCATACAAA
TGGGCGTACTGACGATTGAAGTTTCGGTCGCGTACCACGAATTTGTCTTT
>NODE_2643_length_70_cov_229.557144
TCAAAAAGAAAATATGACGTAATAAAGTAATTGGCTTGTCAGTAACACTGGCACTGGTAG
GACTTGCCGGACGTTGAGCATTTGGATTTGGCCAGCACGC
>NODE_2645_length_357_cov_3.582633
AAAAAAGTCAAAATATAAACCCCTCCTTGGTTCTTTTAAGACAACTGGTCAGTCAGACCA
TGGGTTTGACAAATATGCACACGAAAAAAGTTATTCTCTAGACGGGGAGCAGTGGAAAGT
TCCTGTACAGAACCAGGAGCCATCAAGTGGACATCAAAATTGAAGACCTCAGAAGACTAA
TTAGATCGGAAGAGCGGTTCAGCANAACTTCTGGAGTCTTCTGATTAACGAGTTCTATTG
TACTCTATTATATATCACTTTTTTATAAAGAATGTAAAAGAATCTATTTCTCTGTGTTTT
GTATAAACAATTCAAACTTAATTTCAGCTGTATGTTTTTTTAATCAAAAACCATTTAAGA
AAATAGACAATTATTCACGATGTTAGG
>NODE_2649_length_156_cov_66.506409
TCCAGTCACTTGAACAGACGTGGTCATGTTGCCTTGAGCTGACCGCCTAGTCCTAGGCGC
TCTGTAGGGGTCATATTCACAAGATATTAGAACTTGCTCGTGCAAGTTTTGGAAGCATCT
CCTGTGACACTCGTGGTGCCAGATGTAAAGAGTTTCGTTTGGTGTTGCCGTGGAAAATCT
GTTTCT
>NODE_2668_length_85_cov_43.894119
AAATAGGGATAACAGGGTAATTTTATTCCAAAAAGGGAATTCCTCAAATAGCCGCGATTG
CAAGGGTGTACAGAGAATTTTGTTCTCATTCATGTTTCAAGAATAAACTTTTTTT
>NODE_2673_length_171_cov_72.169594
CCAAATCGTCCGCCCCAACCACCAGAGCGTCCACCCCATCCGCTGCCCCAGCGAGGGAAG
CCACCTCGGAATCCACCGACTCTGCCACCACGATATCCACCCCAGTACTGGGCCATCGCG
ATGGACAGCAGAGCTGCAAGCAGGAACAATGCGAGGAGGGCGTTCATCTCAAAGCCTCGG
GTGTTCGAAGGTTGTCCAGCA
>NODE_2798_length_37_cov_148.405411
TATTTATCATAAGTGAAGACGATATGGGGATAATTCACATAGAGCCACACAACTTCACGG
ACGTATC
>NODE_2799_length_31_cov_147.580643
GTGTTACAGGACAACGTGAAGGCGTACTTGGGATGATCCCCGTCCACCCAACGGGTGCAG
T
>NODE_2800_length_31_cov_27.677420
CAGCGTACCTCGACGGGCACTGCACGTAGAAACTGAGTTTTGGGAACTTCCTGTAGCACC
T
>NODE_2801_length_31_cov_52.000000
GGTGCGCTCAGACAGAATGAGAAACACAAGTACACTTCATAGTCTTTCATTTAATTTAAA
G
>NODE_2802_length_42_cov_18.214285
ACACTTCATAGTCTTTCATTTAATTTAAAGTGCTCAAATGTTGGTCCGGTCAACGCTCTT
GGCCAGGCTTTC
>NODE_2817_length_92_cov_129.782608
GTTGTCCCCGTTGCTGTCGGCCAGGGCGAAGAACTGGTCAAAGTCGCGATGGTTGACCTC
GTCGTCGTTGTTGAAGTCGTACACGGCGTAGAGAGAGATTAGATCGGAAGAGCGTCGTGT
AG
>NODE_2857_length_109_cov_20.192661
ACCCAACTGTATCACTTATATGCTACCAGGGTATCGGCATATCTGTGAAAATTCATTTTC
CTTAAATGTTTTCTGGTCAATGAATTAAGTACTAAGCTGTGATTCTAGAATCCAGAAGTG
TATATCCTTTAACCGCCGC
>NODE_2870_length_199_cov_29.763819
TTTTTCGAATTCGTCGAACTGGACGATGACTCCCTCCCGGGATTCGGTGATTTGATGAAT
CGACCGGAGCAGCTTCTCCATTTCCTGCACTCGTTTCCTGAGGGCCATCAGCTTGTTTAC
AGGCGTGTCGCCGAGAACCCCTCCAGCAAGGACAACAAGTGTCAAGACGCGGAAAACAAA
TGCCATCTGCATGAGGAGCATGTTGAGAAGATCGGAAGAGCGGTTCAGC
>NODE_2871_length_71_cov_1.112676
TTAAAAGGTCCGACAACGTCTTTGGTGATCCATCCACCATAGAATTGACCTGGTTGGGGT
GTAACACGTTCGCCATCTACTCGACATTCGTCCATTCGACC
>NODE_2872_length_142_cov_1.901408
CTGGAAACTAGTCATCCACCCTCGTACTATATCCCACCGGAAGATGTTCGTTTGAAAGAA
TATTTTAAACCATCTTCTGATCGACATTCCTCTTTTTGCGAGTGGAAAGGTGCAGCGAGT
TATTACACGATTGAAGTCAATGGTAAACGAGCAGAAAATGCTGCTTGGTATT
>NODE_2883_length_70_cov_16.657143
AAGGGTAACGAGGCTGAAAATCAAGTTCATTTTAACAGTTGCAATTTCTCGCTTAAGCCA
ATCTGATTTCAAATATTACAGATCGGAAGAGCGGTTCAGC
>NODE_2884_length_40_cov_59.400002
AGGGGCAGAGAATTTGTGCAAATCCAAAGAAGTGGGGAAAGCGTTGCAAGAACAAGAGAA
AAGAGGTGGA
>NODE_2886_length_45_cov_76.755554
TGCAAGAACAAGAGAAAAGAGGTGGATTTATTGCAGCTATTTGTGCAGGTCCTACAGCCC
TCCTTGCTCACAATG
>NODE_2989_length_40_cov_267.924988
CATCATCGCCAATCAATTCGCCGATCTCAAGTATGGTGACGCCTACTTCTTCCTGAGCAA
AGAATACCCC
>NODE_2993_length_82_cov_147.475616
ACACCATCACACATGATCCAGCACTCTAGTAAGGCTGGTCGAAGTATTTGGCGAACACCT
CGGCGTTGAACTGTGGGTGCACGGAGCATGGCCTCACGGGATTGGATTCAGA
>NODE_2997_length_35_cov_336.600006
TTGGATTCAGATGGAATAAACCATGTGTTGTCTTGGACGTACTGAAGTTGGGCGCTCTTA
CACAG
>NODE_2998_length_31_cov_7.225806
GGATAACAGGGTAATAGAAGTGCCCTCTACTCTCTACAGAAATCGTCAACATGGCGCTGT
T
>NODE_3002_length_34_cov_147.617645
ATGGCGCTGTTATTAAGATCTCTTGCTCGGTCACAATGTATTTTGAGGCAGACTTCTTTG
ACTG
>NODE_3007_length_31_cov_33.645161
TGGCAAGATGGGGCTTGTAGACTGTAAGAAAAGGTGACAGAGGGCGATTCAGCTTTCTGT
T
>NODE_3062_length_32_cov_4.812500
ATAGGCCTGTAACTCTAGGCAGACCACATCCATAATAGGCCTGTAACTCTAGGCAGACCA
CA
>NODE_3065_length_54_cov_1.870370
ATAGGCCTGTAACTCTAGGCAGACCACATCATTTATAGGCCTGTAACTCTAGGAAGACCA
CACCCACAATAGGCCTGTAACTCT
>NODE_3066_length_612_cov_21.305555
ATTGGGCTTGACGCCGTATGCTGGACCCCCGTTGGCCTTCTCCTCCTCCTCCTTGATACG
CACGTAATCAGTGGTCAGACACAAGGCGGCAAAAACGGAGAAGAAACCAGACAAAACAGC
AAATCCNATAATCGGTGGTCAGACACAAGGCTGCAAAAATGGAGAAGAAACCAGACAAAA
CAGCAAATCCAAATGACCACGAGAGGAAGTTTGAGTCTGGGTTGGGCAGCCACTGCCTGT
CGATGTCTGCTTTGATACCAAATATGGTCACGGAGACCCCAATCAGCAGGAATGACACAA
ACATCATAATGGCCGTGGTGAAGACGTGTTTCCTTTCTTTCTCCTTTGGAAGACAGCGCA
CGTAGTACATGATNAGTATTGTTGACACTATTTGACGTCGTAGTCTGGGTCCCACTAGTA
CTAGACCTGCCGTTCCTTGGTCCCCCCCAAGTTGGTTCCGGTGTGACCAGCCATGAGTAT
TACCTTTTAGGTGGTCGTAGGCAATATAAAGAACGACTCCATCAGGAACATCTTGCAGGT
CAGCAACTTCGTTCGGAGGGTGTCTGGGTAAGACTGCTTCTGGAACCAGTAAGAAAACAC
ACCCTTAGAGAGGTCGGTCACACCTCAACGCTTTCGGTGCTG
>NODE_3150_length_108_cov_5.111111
CTCGACATTGTTAAGTAAAAAGTATTAAACATTTTTAGATAATGGTGTAATGTTTGCTTC
TCTCCCAATAATGTAATAGCAACCTGCTTCAGAACATACAAAAAAGACGATGATTGTGCT
AAAGTGTGTTATGCCTAT
>NODE_3151_length_87_cov_1.965517
TTTCAATTAAGATTATTTTTTTTTAAACTATCATTTATTTTTTATGTTAATAATTCAAAC
AAACAAGTTTTAATTGCATAAATTGTTAGTGAGTTGCGTGCAGCTTACACGGTTTGG
>NODE_3152_length_116_cov_92.155174
TAATTTTTACTGCATACAGATAAAGATCACGAAGAACCTCTCCAGTATGTACGCCTTGAG
TTTTCTCCTTCTGCTGCCTATCGTATCCGCGCAAGTGGCTACGCCGCCGAGGCCGATAGG
ATTTGTGTACAACAGAGGCAGCTCCA
>NODE_3153_length_36_cov_29.472221
ACGTAAGCCGCCCTTGATGCGTAGAAGGCGTTTTGGTGGTAAAGACGGAAACAAGAAGGG
GTCTCA
>NODE_3207_length_40_cov_198.925003
TGCAGCCCTGGCAGCCATGCTGGGGGCGTGTCCATGGGATGCCCAGCCGGATATGTTTGT
GTTTTCAATG
>NODE_3218_length_37_cov_195.729736
GGAAACTTGGCATGGACCTGATTGACGTAGGGCACCAACAGCTGGCTGACCAACATCTCA
ATGTGGG
>NODE_3221_length_54_cov_183.129623
TCATTAATTGCTGCCATTGCCAGCAGGGAATCAAGGGGTGGAACTCTTCTTGTTGCAACT
GGTGGATGGGGAGACAACCACAAT
>NODE_3313_length_63_cov_51.412697
CCAGAGATTACATTAGGAACCATACCTGGTGCTGGTGGTACCCAGAGACTGACAAGAGCC
ATTGGCAAGTCCAAAGCCATGGAAATGGTTCTC
>NODE_3393_length_56_cov_129.125000
GCAGAGAAGCTGAGGGATCTTGGCGTGCAAGTTCTGTGTGTCGCCATAGGCAGTGAACTG
ACGGATGCCGTTGTCCTCAATATTTG
>NODE_3529_length_369_cov_6.346883
ATTACTTAGACATTCGGCAGACTTACTCGAAGGTGTGCGACTGGATTGTAGGGTTGAAGT
TCGCGTAGTATGGAGTGATTTTGTTCTTCTCAGCGTTGTACTTGTCCAGAGATGCTTGGG
CGCCGTACAGAAGCCTATCATCCTTGATAANAAGAAGGAGTGCTACCGGCCCGTTCTCGA
TTAGGTCCGCAACATCCAAGCAAGCGTGAAGTCCACCAACAGCATTTGCAGCAACCTGAA
CAGGTCTGTCTACTTCACCAGAAGGTCTGAGAGGGTCGTCAAGAAGCACAACATTGACTC
ACTCACCAGTGAGTCACACACGCGTTTGCACCCGCTCATCTAGCTGCTTGACAAGGAACG
GTAAGAGGATGACGAACAGCCGATTAATGTCATAATGGG
>NODE_3540_length_142_cov_4.239437
AATTTGTTCGAATGGTAGGGTATCTCTCTTGAGGCAAATCCCAAATATAGTTGAGTCTTC
AGCACAACTTTCAGATTCAAGCAAGTCCTTCACTTTTTTAACCACTGCTGAACACATAGC
CAAACTATTCAAGCTCTTTGCAGTAAGGTTGTTAACTTTTATTTTACCTGCA
>NODE_3708_length_61_cov_164.213120
TATACATAGTTCTGCTCTCTGTGGGGTTGGCCAAGAGTTACGGAGGCTGCTGGTACAACC
ATCAGTTTGTTCAATTGGGCGCATTCCAGCC
>NODE_3711_length_76_cov_60.381580
GGGCGCATTCCAGCCTGAGCCCTGCCTCTCTTGTTTCTGTTTCGACTCGGGCTCCACCGA
TTGTTTCATCATCCAATGTCCGACATGTCTATTTTACTACTACAAA
>NODE_3712_length_42_cov_51.333332
TTATTTCAAAAAGTGATTTTCCAAAACCGTTCTATTTCCAGCTTATGTTAATCCGACATC
CACCTACGTTTC
>NODE_3753_length_37_cov_100.837837
CGTTTGCCTCCCGGCACTGGCCATGAGCGCCATTGACTGGGATCTTGTGGCTTCCGGGGC
ATTCGCC
>NODE_3754_length_188_cov_96.127663
AGTTGTTGCAAGTTTCATCTGGGATGCCATGCGTGTGGGCGTATTCCCAGACTGCATCGT
CAGAGCCACCTTCACAACTTCCGGCATTGGCACAGTCGATCACGTGCTGAGCGGACAAAT
AGGCTGATGGCCAGACAGCTTTACGTGCAATGTTGAGTCGGTCAGCCAATGCGCTAGTGG
CCGCCATGCACCAACAGGAACCACAGTACTGGGGGATG
>NODE_3757_length_31_cov_98.774193
TAAAGACATATCCTCGCCCATGGGAGTACCCTGATGTAGTGGCGTCTCTCCCGTCACAGT
G
>NODE_3830_length_46_cov_35.891304
ATGTGGCCCCACGACCATTCGACTTGTGCGGTGTTGCAGATCCGCGAAGTCCACCAACGG
CTTCGTCTCGTCCTCC
>NODE_3869_length_51_cov_64.607841
ATGTGGTACTTGATTATTTCAGCCAGATCGGCAGGATGAGCTTGCAAATAGGCCAGTGCC
GTAGGGGATAACTTGCTGATG
>NODE_3903_length_68_cov_8.985294
CAAATTAATAAGCTTGCGGGTTTCTGTTGGTTTGACTATGACCACTTGTTTCATGATCAC
CACTTCCCAGATGTTAAGAAACTAACTAATGAGGAGCT
>NODE_3906_length_31_cov_28.548388
CACACCTGCATCAACATCAACTACACACGCCCCAACAACAACACAAGCACCAACAACAAC
A
>NODE_3912_length_47_cov_3.404255
CAAGCACCAACAACAACAACACAAGCACCACCAACAACTACACAAGTACCAACAACAACA
CAAGCACCAACAACACC
>NODE_3937_length_35_cov_223.600006
AACATATTTGACAGTTGGTTTCCTGCCCTCATGATGAGTCAAAAGATCGGAAGAGCGGTT
CAGCA
>NODE_3938_length_36_cov_58.083332
AGGGACAACCTTAAACTACTGGAACAAATCCCTGTCTTCAGCTCATGACTGTCTCATCAC
ACCATC
>NODE_4099_length_31_cov_6.064516
TTGACTTAGGAATTTCTTTGATAATAGATGTTAGATGTGGTGCAGCACTTCAACGCTACA
G
>NODE_4101_length_209_cov_4.464115
GAAAACAGGAAAAAATAAAACATTAGTAAAAAGTCTTTACTTGGCCTAATGATCTTAATG
CTAGCCAAGCAGATTTTCAAACATCTTCATATTTCATTTAACATGTTATAAAATGCATAA
TTTAGTAAAACCTTCTCTACATTATCAATTCATCCCAGTCTGTGTTGACTGGTGAGCTGT
TTACCCTAGGTGACAAACATGACAAACACTTAAATAGCTCTAGAACTTTGCATCCTCTC
>NODE_4102_length_44_cov_69.204544
CTTCTTCTGTGTGACTTCCAAGACTTCAAAACCTGAGTATTGCCCGTAGTTGCCAGTCTG
GGTACTTTGATCTA
>NODE_4122_length_71_cov_2.140845
AAATGTGCAAATTTCTTAGCTCAACTGAAGGTCCGAGTCGCCGTGATAGTTTCCTGTTGG
GTCAATGCCATGCTCGTCTGATACAACTTCCCAAAACTTCG
>NODE_4123_length_113_cov_2.973451
AAAATAGGGATAACAGGGTAATAAGTTCCTTGGTTACCTCCAAGCCCACTGAGAACAAAG
TAAGGCTGACGTTTTTCTAGGTGCATCGAGACCAGACCAAGGATTGCCGTATTTCCAAAA
TTTTTACCTTATGGAACATCCTG
>NODE_4124_length_33_cov_62.242424
TTTTTTTTTTTTTTTTTGTGGGCAACGAATTTATTTAATTTATTTAGTGGCAACAGCAGA
GGA
>NODE_4294_length_174_cov_59.695404
TTGGCTCAGCAACGAGCATTGGCCCAACAACAAGCTTTGGCTCAACAGCAAGCTATGGCC
CAGCAGCAAGCTATGGCTCAGCAGCAGGGTCTTTTGCCCGCCTTTGGTTATCCGGGATCC
CAACGTCCCAGCCAAGATTCTAATGCTGACGACAAGGAACAAGAGCCTTTAAGCTCCCAT
GTCGAGAGAGTCAGAGCCAAAAAT
>NODE_4296_length_54_cov_46.148148
TTGACATTTTTGGCTCTGACTCTCTCGACATGGGAGCTTAAAGGCTCTTGTTCCTTGTCG
TCAGCATTAGAATCTTGGCTGGGA
>NODE_4309_length_150_cov_57.400002
GGCGGAGAAGGAGGCGTGTCTAGCTGTCAATTAAAAGACAACTTTTTGACTTTAGGCGGA
GATAAGGGCCTGTCCGGCTGTGGGACCTCCCTTTGCAGATCAGACAACAACTTATCAGCA
TTATGTTTGAGTCTTAGAGGCAAGTGGGATTCAGGATCACATGCTGTCCCGCTATTGAAA
>NODE_4310_length_69_cov_87.681160
ATAGGCTAGGGATAACAGGGTAATTGTTTATTTGCTTGTCTGGACATTCCCGGGTTTTAT
CATAGTAGTAAAAGCATCCATCTCGACGTACCAGTTTCT
>NODE_4315_length_39_cov_61.153847
AAAAATAGGGATAACAGGGTAATAGGACTTCCTGTTATCTAGTAACGCTAATGGCGACAT
CTGTTAAAA
>NODE_4316_length_58_cov_148.689651
TAGTAACGCTAATGGCGACATCTGTTAAAATGCCCTCCCCTCTTCAACCCAAATCCATGA
CCAGACCAACACAGTGGAATGAGGAGGT
>NODE_4376_length_37_cov_62.621620
GTTTTTCAAAGTGTTCAATAGCCCAATCAACTTTCTGGGCAACAGTACCGCCATTCAGCT
GAATTTC
>NODE_4380_length_424_cov_49.004719
AATAGATCCAGAATTCAAGTATGGCTTTATGAACAGATTAACTTGCGTATTGAAGGTTGC
ATTGTGGGATTTGATGAGTACATGAACTTGGTACTTGATGATGCTGAGGAAGTGCATTTG
AAGACGCTAAACAGAAAGAGGCTGGGTCGCATCATGTTAAAGGGAGACAATATCACATTG
ATCCAACAAGTCCAGTGATTGCCTCATCACATCAACCATTCATTCATCATTGGTGTGTCA
GCCGTGTGTACCAGTGAGGTGTGCTTGAATGTGGAATGACCTTGAAATGTGTTTGTTCAA
TAACTAGTAGTGTTGTATCCATTCACAATAAACATTTATTATAAAATTATACAGCTACCA
ACAATTTGTGCAAATAGTTGGTGTAGGTTAAAGTCATCATTTCATCTCCTAAAAGCGGGT
GCTGTTGATCTTGCCCAGGGCCACGCCACAGTCG
>NODE_4430_length_102_cov_176.450974
GCACGGAGATCAGAAAGTTTGCTGAGACTTGTAGAGACATTGGTGTCCAGTACATGGGGC
TTTGTTGCGGCAATGCTTCTCATTACTTTCGAGAAGTGGCCGAGGTTTACCAACGTACCC
CACCTGCATCTC
>NODE_4434_length_68_cov_47.882355
TCTTTTCAACTTCCCGCTTTGCTTTTTCCTCTTCAGATAGTGGTGGCCTTCCTTTCCCTC
CAGTGGCCTTCTTTGCTGGTGATTCTTTGGTTTTCTTT
>NODE_4460_length_243_cov_51.736626
ACAAAATAATTCCTAAAGCGTTTGGTGGTCAACAAGGGAAACAATAGTAGTATTAAGATC
AAATAATCTCAGTGATGACGTCCCTTTTCTCCACTGCGGCCTCCTTGTCCACCCAGAAAT
CTACGTAGTCCTTTAGGGGGGGTAGTTGGGGGTGGTGCAGGGGCGTTGACGATCAGATTA
AATTCTTGATCCAGAGTGAATCCCCTCAGAAGTACGGTAGTGGAGTCCTGGTCTGATTCT
TCTGCTCCTAGGGTTTGAACCACACGACCTTCA
>NODE_4469_length_41_cov_200.804871
GTCTTTTCTGGCTTCTCTGGACCTGTTTCTGACAACTTTAGAGTGGATAGCACATGACAC
ACAGTATAGAA
>NODE_4474_length_42_cov_45.000000
TGGATTGACTTGACTGTTGTCTCTTGGTTGTCCTACAGGTGTTTGGGTTGCCAAATCTCC
CGCCGGTTGAAA
>NODE_4517_length_50_cov_63.160000
TTTTTTGGCCTTGGCTTCTTCTTTTGAACCCAGTTTGAATGAACCAGAAGCACCATCGTC
AAGTAGCAGTGACGCCCACA
>NODE_4522_length_94_cov_111.308510
AAGCTATCCTCAAGTACATCATGGCTAACTACAATGTTGGAAAAGATGAAAAGATCATCA
ACAGCCATTTGAAAATGGCCCTGCGAGCCGGGGCAAAGAATGGTAATCTCAAACAGTCCA
AGGG
>NODE_4582_length_119_cov_3.588235
CTGGAGTAAAGCCCCCAGAAAGTTCTAACATACCTGAGTCTACAGATTCAGCAAATGTCT
CATCAACATTCAGTTCATCAACATTCAGTTCATCTGCACCTGAAAATCCACCACCCAGAC
CACAAATTAATAGCACTGTGGAAGCAACC
>NODE_4583_length_78_cov_16.820513
TGCAATGGGGTCGTCGCGCCCCGCTCCGTGTGGCGGATGGTTCTGCACGCTCCCCTGGTC
AGTGTGTGCGATGAAGCGTTCAGCTTGGTAGCTCTGCCCTACACAAGG
>NODE_4586_length_34_cov_31.264706
ACACTGCGTATGTCGAAGCCTGTACGTGTACACGCACTACACGTACAGAAGCCGGTTATT
CACA
>NODE_4587_length_137_cov_5.313869
GACCCCCTCCAGCTGCCAAGCACAACTTTTAAGTCCAGACTCGTCAGACCCATCAGGCCT
AAAAAAGCTGAACATAGCGAGACTGATCATGATGTACACTAGAAAATTTGAAGCCACTGA
TGCCAGGGAGGCACTTCAATATTTTTATTTTCTGAGAAATCTGAAAA
>NODE_4593_length_37_cov_69.621620
TTATGGAAGAGAGCTGGAGATCGAGTTTGCAAGAGGGGATAGAAAATCACCTGGTCAAAT
GAGGGGT
>NODE_4605_length_105_cov_145.800003
AAGTTCCTGTTTCCAAGATGTCGGAACGATACAGTTTTTCTCTTACAACATTTAGTCCCT
CAGGGAAGTTGGTACAAATTGAATATGCTTTGGCAGCTGTCGGGGCTGGTGCTCCCTCTG
TGGGTATCAAAGCTA
>NODE_4651_length_213_cov_5.305164
GACAAAGATTGCAATGAGAAAGAGTGGTGTGCAGCGGAATTCGTTTGCCACGACGCTACA
AAAAATAATGATTTGAAAAATCTTAAAGATCATTTAAACAAGTTCCAGACCTTACAAGGG
GAACTCTACAGAGATTACAAGACAAATGGAGGGGGCCAGATGGTCATCATTGTGTCGCAC
CCACACGGGGGCCCTAAAAGAATCAGTTACTACACGAATTTCCGGCATAGGGAGATAGTG
ACG
>NODE_4673_length_99_cov_5.909091
AAGCTCTAAGGTCACCGTGCTCAAACGGGTGGGCTGCAAGAATGGCTGGGCCGTTACGGA
GCTACGATCCTTCGAATTGCAGACGAGCTGCTACTGCGACACAAACGGGAGATCGGAAGA
GCGTCGTGT
>NODE_4688_length_122_cov_16.385246
TTTTCTTTTTAGAAGCCTGCTTTTTGTTTTGTGTCTAGTTTATTTAGTCTTTGGTGAATG
GAAAACAGCTCTGTTGACTGAATTTTTGTCCGAATATTAAGCTGCTGTCTGTCTTAATAG
GAAAGAGCTTGTTGGTAGGAATAGAAAATTTA
>NODE_4724_length_38_cov_199.289474
GACCTCACTGACCCACAGAGTTACTGGTGTTGCCATGCAAGTTGTTATCTGTGGCACATC
TATCTTAC
>NODE_4725_length_136_cov_133.411758
CCAAACCCCAGGCCAGCATCCCAGGCCAAATGCCTGATCCCATTGAGGAAGTGATATGTC
ACTGGGAAGGCAAAGATATACTTGAGGCCATAAATGATGATTGGACCGAGACTCAGATTA
CGTATGTATTCCAGGTTCGTCTTGTAGTCTCCAGGCAGACAAAGCA
>NODE_4744_length_73_cov_66.972603
GCTTTGGGCGGAGGTTGTGAGTTGGCCATGATGTGTGACATCATCTATGCTGGAGAGAAA
GCTCAGTTTGGCCAGCCAGAGATTACATTAGGAACCATACCTG
>NODE_4746_length_99_cov_91.323235
TTTTTTCAAAGTGTATGGACTCTGCCAATGTCAGTTCATAACCAGTATTAACAGACTCCT
TGCAGATTGCTGTGATAGTTTTAGAAAAACTTGCAATTTTCTCAGCTGTTTTAATTGCTT
CTTCGACAA
>NODE_4892_length_42_cov_72.261902
CCATGTCTTCAAGAGGCGCAGGACCAAGAAAATATGGGTTGTCCTCTGTTCCTATGTATA
ATGTCAATTGAA
>NODE_4896_length_99_cov_72.686867
AAAAAAAAGTACCTGGCTATGTCCGGGGCTATTGCAGACGGTTCTGGCAAGGCAGTGAAG
ATCATCGTGGAGTACCTGGAAAGCCTGGGCGAGTTGCAACTTTGGTACCATCTGAAAATG
AAAATGATG
>NODE_4900_length_180_cov_3.961111
AAATTACATCTCTGATCATTTTATCACCCATTCTTTCAAAATTTTTTGTTACTTTTACAA
TGGGTGGTTGGCTACAACTAATGCTATAATCATCTATAAAGGATGTAACTATTTTTTTTC
TTATTTGTTAAACTTCAGTTATGCATTAACACATGTTTAAAGTTTTTGTTTTTAAAATTA
ACACATGGATCGAAAGTGAAAGAAGATAAA
>NODE_4901_length_123_cov_74.146339
ATATAAGGGTTTAAATGCAGTTGCTTTTTTTATTAGACTCGACTGAAATGTTTTCATCCA
ACTGGACAGCGGTCACTTGGCGCACATATACATTCCGAAAAAGACGCAGACCATCAGTGC
CTTGCAAAAGATGAGCCCCCCGGCCACGCCCGC
>NODE_4902_length_217_cov_88.967743
GCATCGCCACCCTCAAGACCATCCACGTCATGTACAGCATGCACAAGATCAAACGACACA
GCCAGAACAGCATGATGTCACAGAGAGCCGACGAGATTGTAGACGTGATTCTCAACATTT
TCCTGCTGGTGTGGCAAGGGCTGGGCACGTACTGGATCTTCTCAGAGTGGTGGCCCCCAG
AGACAGAACCCCTGTACAAGGACCCGAACCTGTGGTGCGACCAGACGTGCTACCTGTTCG
CCGTCAT
>NODE_4944_length_68_cov_53.926472
GTAGATAGTCTCGGCCTAACACTGAAGCACACGGGAGCTTGCCTGTAGGGCGTCACATCG
CCAAATGACACCTTCAGCAACGTTCATGAACATTCAAG
>NODE_4990_length_40_cov_79.824997
CCAAGGTGGTGAAGGAGATCCTCGGCCTCCTCCCTGTCCCCACCTCCATGTCCATGGAGA
ACAGCATGAC
>NODE_4991_length_207_cov_12.632851
CACAAACATAGTGTCATTATGATGATGTTAGATTTTATGTTTAAATACTGCCCTAATGAA
ATATACATAGACTCAGAACTTTGTTTTAAATTTGCAAGCAAGAAAGACTCTTTTGTTTTC
TTGTCTTGTCCAACAATTTGATGCCTTGTAGAATTTTAGCCCNTTTATGTTACAATACTT
GCCCTAATGAAATCTACATAGACTCAGAACTTTCTTTTAAATTTGCAAGCAAGAAAG
>NODE_5015_length_39_cov_259.820526
GTGGACGTGATGTGAATGGTCCAGTTGTCCCCGTCACGTGTGATCTCCTCGTAGCTTGTG
ATGTTGTTG
>NODE_5017_length_36_cov_118.500000
AATCATTAGGGTAAAATGTCTTCAATTTTGTCTCTCATCTATTTAACTGTGGTGCGATGT
TCATCC
>NODE_5096_length_31_cov_9.129032
TCCAAATCGCAAGTGGAACTTCATTGAAATCAACATCTCACAGGCCGAGGTTCAAGCAGT
C
>NODE_5097_length_31_cov_167.612900
GTGATGAAGCAGGGAAAGACGCACGCAACTCCGCATGCAGTCTGGCAACACTTGTGCCTG
T
>NODE_5104_length_279_cov_4.677419
GCAAGACGACTTCTTTTACACTACACGTTACTTACCAATCAAGCGTGACCAGTATCAAGG
CTAACGGCAAATCAGATTACCTTTTCGTGCCAAAAGGCCAGAACGTGACTATCACCTGTG
AGGCTAATGGCGAACCCAAGCCTCAACTGTCGCTGACAGCCTCAAGGCCTGACAACTTAG
CCCTAGGGGGACCAGTCATAGTGAACGATCTNATTAGTACAACTTCTCAATCCTTGACTG
TGGTCATCAGCAAGTCATCTTCAGTATCAACCACAATAGCGTGTTCTAGACTATAGCTCA
AAATGTCGT
>NODE_5141_length_77_cov_99.558441
GCTTGGGAAGACAGCAGAAGATCCCAGCGTTACATAAAAGTTACAGCGGTCACCCTGGCA
GCACTCGTAACATTCCCAATCCCGGTACCAATCCCTCATGCACTTCA
>NODE_5142_length_500_cov_10.184000
CAGGTCACTAGTTTTTTAAACACCGGTGAGCGTCTTTAAACACATGTTGGCGTCCTTAAA
CACATGTTGGTGTCTTTAAACACGTGTTAGTGTGTTTATTAATGTTACTATTGAAAGTTT
CACATTTGAATTTGTCTATATAATGGGGTGTGATGTCATGGTTGACCTTAGGACGACCTT
GAATCCAAGACGTCTTGGCCCGGGGTCACCTCCATCTTGTCGGCCACTGCCGTGAAGTCC
ATCTTGTTGAAGTCCTCNACTAGTCGCACCGGCACATCTAGACGACCGGTGGGGACTTGT
GCTGGTCCCGACCCTACGACAGGTCGCACTACAGGTCGAACGGCCGGTAGCTGAACCGGG
CCAGGTACAACCGGCGGTCCATGCACTGCAGTCCTACCAAGAGCCGGCGAACGTATTTGA
GTTTGGCCTAGAACGCTGTTCGCCCCCTGGTGAGGCACATCTTCATCTGGTGCTGGTGGA
ACAGTCACGAACACTACCGAAGGGAATCAAGGGGGTCGCAGCTCTACTTA
>NODE_5143_length_74_cov_4.932433
GGCGTCATTTATCAACACCGAAGAGAAGCTTGTAGACATCCAGGCTCCTAAAATAGTCTT
TGCTCACGAAGTATTTCCGCCGATTGTGATCGATTATCGAACAC
>NODE_5263_length_38_cov_110.289474
AATAACACACAAATATGACCAAGCTGGCCATTTGTTTGACTGTTTTGTGTCTTTTTGGAA
TGAGTTTG
>NODE_5296_length_34_cov_239.382355
TAACAAGTATAGAGCAGGCATTGCTTGGTGCCAGCTACCTGGCAGGCTCCACAAACACAG
CCGG
>NODE_5297_length_56_cov_103.821426
CTACCTGGCAGGCTCCACAAACACAGCCGGGGCTCTGACCTACATACAAAACACGGGCAT
GTTCAGTAGTGCAAATGGGGGCAGGG
>NODE_5303_length_51_cov_232.627457
TATGCCAATAGAGATCATATGATAGCCCAAGTCTTTCAATCGTTGGGCTGCAGTTTTAGT
CTGATCTGGATTATTAGACTG
>NODE_5317_length_32_cov_127.000000
CCCCCGTGAGAGGCGTATATGACGATTGCCGTTACTTTGGACAGATCGGAAGAGCGGTTC
AG
>NODE_5318_length_57_cov_262.842102
TTTTTTTTTAAGTTGTGAACATTTATATCTTTATTTCTGGTTGTGTTTCTGGTCCAACGT
TGAACTATTCCCACATGCCTGAAGAGG
>NODE_5341_length_122_cov_40.180328
TTGACATCTCTGTGGGCCAGGGAAGTTCCACTACACATGTTACCACTTCTCTTAGGAAAG
TTTGGCTGGGGAGGATTTGTCCCGGGGCAAAACCAGACAACAAGGAGTCTGTTTTGAAGG
CTTTTTATTCCCGCCGCCCCCAACCAAAAAAA
>NODE_5343_length_119_cov_7.798319
GTGTGGGCTAAGGAGCATGTGAGTGCTGAGGAACGTGAGTGCTGAGGAACATGATTGCTG
AGGAACATGAGTGAGACGAGGAACATGTGTGATGAGAGACATTTGTGTGCTAAGTGACCT
GTGTGTGCTGATGTGTAATTGTAGCAACC
>NODE_5344_length_38_cov_34.921051
CACAAATGTCTCTCATCACACATGTTCCTCGTCTCACTCATGTTCCTCAGCAATCATGTT
CCTCAGCA
>NODE_5363_length_51_cov_42.686275
ACCAACTCGGAGATATTGACAAATCACGAACGTTTACTGGACGATGGACCCGGAGGAAAT
CTTACACTATATTTTTGAAAC
>NODE_5364_length_187_cov_27.550802
TGTGTACTATCACCTGGCATGGTATTTCTACTGGTCATGCTGAATTGAGGTGGTGCATGC
TTATAAACATCAGGCTTTGTTACATTATAGGCCCCAGGTCCAGGAGTCCTGGCAAGATCC
TCATCAAAGCCTCCTTGTTTACTGCGACCAACAAGAGAATAATTGGGTGCAGATTTTTTA
TGGGACTCGGTTGTTTTGCCAAGCATTCCAGGCAGAG
>NODE_5453_length_66_cov_139.257568
GGCTCAACGTCCAGCGACCCAGGTCTCCCAGTCCGGCATCACGCGGACGTTCATGTGCGT
TTCGTAAATAGAGACCGCTATGAGGAAACAGAGGAG
>NODE_5509_length_325_cov_6.895385
GTATCATTGTCCTTCATAACTTTCTTCACAATGACCTTAACAAAGTCACTGAAGTCAAGC
AGGAATGACTGATGAATCACATCAACCGACCCCCTCCTCGGGGTAGGATTAACTTTAGGG
GGAGGCAAACCGACAGCCTGGCAAATGATTGTCGCTATCCGATCAGCCTCTTCGATGTCT
GTTCTTAAAGGGAAGAGGAGGCTACCATCTTCTGCTCTCTCAACCAAAAAGTTAAATATC
TTCCAGATTTTGAAGCAGTCTTTACTGGGGAAAATTTTAGGACTTGGCTTCCCACCAAAA
ACATCCATGGGCTCTTCTAGATCTTCTTCTTCAACGTCATCCCCATTTTCATGAT
>NODE_5510_length_33_cov_19.151516
CTTCTTCAACGTCATCCCCATTTTCATGATTCTCCCCGTTGGGAACGTCTGACAGGATTC
GTT
>NODE_5512_length_388_cov_7.824742
AATCTGGGACAAGGTGCCTGAAGACAGCATAGACTTCAACCACTTCATCACTGTGTTGAA
CAACAACCTGCTGGTGGGGCTGGACAAGCACCCGGAGACAAGGCAGGCCACTCTGATATC
CGAGATAGACAATTTGTGCTGGATGCTGTGTGAGAATGTTTATCGCCAACGAATCCTGTC
AGACGTTCCCAACGGGGAGAATCATGAAAATGGGGACGACCTTGAAGAAGAAGATCTAGA
AGAGCCCATGGATGTTTTTGGTGGGAAGCCGAGTCCTAAAATTTTCCCCAGTAAAGACTG
CTTCAAAATCTGGAAGATATTTAACTTTTTGGTTGAGAGAGCAGAAGATGGTAGCCTCCT
CTTCCCTTTAAGAACAGACATCGAAGAGGCTGATCGGATAGCGACAATCATTTGCCAG
>NODE_5523_length_224_cov_29.357143
TAGAGCAATTGAACAAGATGGACTTGTGTGGGGAGCTTCCAAACTTGTTGAAGTTGGATA
TGGCATCAAGAAACTTACCATCATGTGTGTTGTGGAGGACGACAAAGTCAGCATTGAAGA
TCTGTCTGAAAAAATCACTGGCGAAAATGAAGATNGTTGTTTTAGATCCGACCCTGTCTA
CACATCTTTACACAAATTACACTACGTTATTATTTTTTTATATAAATACACTTGTGATGG
TTAAAGTTTTTTTT
>NODE_5579_length_55_cov_3.872727
GTGGAGATTCGAAGTGATAAATGTATTCAAAGGACGCCGGAACTAGTGGAAACAGATATG
AATCTCAACATGAGCAATGTTGTTC
>NODE_5586_length_31_cov_5.677419
CCATTTTCCAGAATTACTCCACATTCCATCGATTGTGATGTGAAACTCAGACATTTGGTG
G
>NODE_5588_length_50_cov_153.740005
TGTTGGCCTGGTAACCTCCGTTTCTGCCGTAGGATGATCCTCTTCCAGAGCCGTACCTGC
TGCCGTATGACCTTGAGGCG
>NODE_5592_length_349_cov_24.183382
ATCATTCCGTAAAGACAACAATGAACTATTGCTGTTCATCCTCAAACAACTGGCACAAGA
TCAGATCGCCTACCACAGAAATCGTTTTGGAACTGACTTGGATCAAACGGAAATTTCTGA
AAAGGACTTGGCCGATAAGGCCCGACAGATCAACATTCACAGTTTGACATCANTTTCACT
TTATAAACTCCGGTTGTTGAAGTTCGTACTGTCGTTTTCTTTTCAATAGTGAAAGTGCAA
AATTAGAGTTGTCAAACAGAGTTCAGATGGTCATTATTTCTACTGTTTTCTAAATAAAAT
TATAAGTCAATTATTGTAAAAGGTAGGTTCATGCTTATTAAAAGGAAGTGTGTTATTTTA
CATAATATATATACAGTTT
>NODE_5605_length_65_cov_29.353846
AGATGAACTACGCTTTTTTATTTTTTTATTTTGTTTGTAAAGTATAAAATGAACATCACG
TTATATTTTGTTTCTTTAACTTTGCATAAAATATT
>NODE_5607_length_135_cov_24.718519
AATTCATGCAGTAGTAGTTGTCGACACAGTTCGTGCAACAGCGTCAGTGGTATCTGTGAA
GGTTGTGAAGATGGCTACACGGGGGACAACTGTGACCTACCTACTATAAGTGCCTTGGCT
GATGATACAGCAAATAAAAACGTATTTGCCAGCGGCATTGGTGTC
>NODE_5684_length_31_cov_22.129032
CGTTTCTCTTTCCGCCAACAAGTGATCCTAGTTGGTTTATTAGGGCATCAATTTCATGTC
C
>NODE_5930_length_127_cov_8.992126
AACATCACCAGGCAATACACATACTTTTAAGTATGAGGAAATCTCTGTTTAAACCACTAT
AAGTGTAAGATTAACTGATTCTTTGTCCGTTTTTNTCGAATGTCCAGCCGGCCCCGCAGT
ATTCGACCAGTTGACGCGGTGGTGTCCGCAACTCTGT
>NODE_5941_length_517_cov_15.174081
TGTCTTTCTCATTGTTCTCATAACACTAAACTTTTGTGTGCTGATAAAACTCTCCAGCAT
AACACGGATGGCCATGTTGACGTCATCTTCATTGACATAGTCTCTGAGGTGAATTCTGGC
ATGTGCCTCACTCATCCTTATCATAGATTCTATGTGACGCACTGTGATTGGTATGCTCCC
AGTTGCCATTGATTCTCTCCTAAGCTCTGAATACATTTTTGCAATTTTATCTTGATCCAT
CTGATGAAGTTTTGGTCGCACCTTTTCCTTGGCATACATGATGTATTTACGGAGTAATTC
TTGTGGCACTGGGTCAATCTTTGACTCACCCAATTGCCTCTGTGGAAGCTCTGCCATATC
ATCACTGGCATGAGGATGGTGCTTCATATGGCTGCCAACGACAAATCTTGCCAAACGTTC
ATCCTGAACAGAATCAACTGTGTCTCTGACTACACACAAAACATCAAAACGAGAAAGAAT
GGGCTCTGTTAAATCAACATTTTCTGAGAATGTCAAGGACGGATCGTATCTTCCACCTAT
AGGGTTA
>NODE_5951_length_72_cov_162.000000
GGGTTAGGGCAGGGAATGCCGGATGTAGCACAATGAGATCCCTCATCTCCATTTGCCAGG
TTGGTCTTTGTTAGACGGAAGCCCAAAATACATCCGTCACAT
>NODE_5976_length_44_cov_1.159091
GAGACTGCGGACGGCTCATTAAACCGGTCGACAAATGCACGACAGTACGCAAATGAGTGA
AAGCTCAAATATAC
>NODE_6039_length_48_cov_142.854172
CAAGACCTACGCCATTGTTGGACTGTGTTACGGATATTACGAGTGCTACTATGGCGAGTC
TCTCTACCGTCAGTGCAA
>NODE_6040_length_110_cov_54.263638
AAAAAAAACAGCCACAACAAAATGGCATCTCCACCGTCAGTTCGTATTCTAAGACTGTCC
CTGCTTGTACTTGCGGCTCTGGTGGGTTGCATGGCTGAACAGGAAGACAGTGGGGTCAGA
TTCGTGTTCCCGTTCTACCC
>NODE_6050_length_31_cov_135.064514
GCTCGGACAGCAGTCTCCGTAAACTGTTTCCGGCTCTACACCATCCTCACACTGGACGGG
C
>NODE_6055_length_31_cov_14.483871
GTTTCCATGTTGTGGGAAGGCCTACCCCTGTGATATTTGCCATGATAAAAAAGAGGATCA
T
>NODE_6165_length_367_cov_8.250681
GGGTAATCTCCCTTTAACCCTGGCATTGCTCTGAGAACGTGAGTTCCTCAAACACAAGAT
GGCGAACTTCACGTCTGCATGGGGAATTTTAGCTCAGCTTTTCTTACTGTGGGGACTGGG
TGCCGGCCAGAAGGCAAGGTGCCCCGAGGATTATCGCTACAGAGTGGAAACATGTGTCAT
GGAGGCCCAGGTGGCCCCGCAAGCAGGAGGGGGTCTGCCTCTGATTACTGATATGGATAA
ACTGGAAGAGTTGTGCGAGAGAGGCATTCTCCAGAAGACCATCGACTGCCTGAGGGACAT
TCACACGCGATGCTCCGACAACGTCACCCAGCGGCTGGAACTCGACATGCTCTTCAGTAT
TGATGAGTGGAAGCAGGGCCAAGAACTCTTGTGTGAA
>NODE_6166_length_287_cov_7.048780
CCCTGCGTTGGTGATATCTTTACGGAAGTTTTGTGTCCTCTGGAGAATGCAGCTGGAAAT
GCGTGGCCCAAACTTGGACACGCAGTCAAAGTGATTCTTGAATAGGTTAAGATCTTCACA
CAAGAGTTCTTGGCCCTGCTTCCACTCATCAATACTGAAGAGCATGTCGAGTTCCAGCCG
CTGGGTGACGTTGTCGGAGCATCGCGTGTGAATGTCCCTCAGGCAGTCGATGGTCTTCTG
GAGAATGCCTCTCTCGCACAACTCTTCCAGTTTATCCATATCAGTAATCAGAGGCAGACC
CCCTCCTGCTTGCGGGG
>NODE_6188_length_87_cov_121.091957
CGTAGAAGCCGAACTCTCGTGCCAGAAAGTTATAAATGGCTGTGCTCTGGGCATAGACGA
CACCGTCTACGTCCAAGGTCGGGACTAGACCATAAGGGGTCAGTGGCTTGTACTTAG
>NODE_6205_length_94_cov_65.191490
GAACACAGTTTTCGCACAATCGGGTGCATTGCCCACAGTTGCATCTGACATAAGTCACTC
GAGGCAACATAGGACAACACACTCCCAAACGTCCGTCACGGTAAACCTTGAAGCATGACA
GTGT
>NODE_6210_length_35_cov_2.742857
TGTGTATGTGTATGTGATAGTGAGTGTGTGTGAGAGAGTGTGTGTGTGTGTTAGTGAGTG
TGTGT
>NODE_6266_length_113_cov_90.504425
AGTACGCCAACAAGCCCTGGATCTATGAATAGACTGCTGTAATACTCAACACAATGCTTT
ACATGTCGTCGGGGTTAGGCTTAATTTATTCTTGCAGTAGAAGTCCCTTGTTTTAGTACA
GGATTCGATCCCCATGCTCGATA
>NODE_6369_length_31_cov_119.193550
GTTGAAGTCTTGTCTCCATGCATCAAATACGGGAAAAGGTTGTCCATGCTAAAGCCTCTT
T
>NODE_6392_length_51_cov_359.686279
ATCTTGACCATGTCCTCTATCTACCTGAGAATCCTCGGCTTGTCCTGTGTCCTGCTCATC
GTCCTGGTGAATTGCGAGGAC
>NODE_6455_length_56_cov_60.910713
CTTGGAAATGTTTAGGTGGAGTACGGTCAAGCTGATAGCGGATGCTGCTAAAGTGAGAGA
CATCCGTATTGTAGATCTACAGGTTT
>NODE_6482_length_145_cov_132.882751
ACTGTCCTTGATGGTCATCTTGGCGTATGTTGATGGTCGGTCACAAGTAGGAGATGATGA
ATGGTCTCCCGTGCAAGATACGACCGACACCAAAACGCAGGATGGTTACGATGGTAGTGA
TAATGGTGTAACGCTAGGAGAGAGGGACTTGATCGAAGTAGAAACTCTGTTAAAA
>NODE_6488_length_137_cov_6.510949
TTTTTTTTTTTGCGACATTATTTGTATTTTATTTTGCATTCCAATCGAAATAAACAATCA
CAATCAAACAAGAAGAACTGCATTGATACAGCCATCATTTTCAGGATTGTTTGTAACTTG
AGCATATTTACCCCAAACTACTTTTCCAGCATGTGTGACAAGGCCCA
>NODE_6489_length_31_cov_7.806452
GCAAATGTTACACACCCAGAGTTGAAAGCTTCATTCTTTTTGCCAATAATTGGTGTGAAG
A
>NODE_6490_length_37_cov_9.540541
CATTCTTTTTGCCAATAATTGGTGTGAAGAAGAACCCAAGTTCAGCCATGTATACAAGTT
TAGGTGT
>NODE_6491_length_50_cov_7.080000
AAGTTCAGCCATGTATACAAGTTTAGGTGTAATCACAAAGGGAACAATTATTGAGGTTAA
CATTAGTGAATTGGGCCTTG
>NODE_6492_length_135_cov_2.666667
CATGAAATCATCAATGTTTACCGTCACTGCTGGTTTCATGTTTAACATTTGATTCAATCT
CATGATAAAAGAAGACTCCCTGTAGAAGACGTCACTGACGTACACTTCCAGTTCACAAAT
ATGAAGATTGTTCGTAAAATACATAGTGAGGCGAACAAACCTCCC
>NODE_6493_length_149_cov_12.335570
TTAAATTTGAGGTGTGTGATTTATTAAGTTCTAAATCAACTGAGAATCTCTGGGGTGGAA
AACGTTTCGATGTTTGTCTAGACAAAGGGACGTATGATGCTATCAGTCTGCATAATGCAG
AGAAGCCAGATGATCGCCTGACATACATTCGTAATGTCAGCTCGCTGTTGAAAGAGGCT
>NODE_6570_length_316_cov_24.104431
ACACGGAGACGCCAAGCACTCAGGGCATATGGCATCCATTTATGTTTAGAGATACCGAAT
GGGCAGTCACAAAGTTTCCAAACAAAAAGCTTTCTGATGTGTTGAGAATAGGACAAACTG
CTACAGATCTTGTCCTTGAGGAACANCGTCAGTGTTTCAAAGGTTTGTTTTTCGAAAGAC
TACACAACTCTTATCCTGTTTGACGATGTCTAGAACAGGAACTCCTTGTCTTTCCCCTCG
GTGAGTAAGTCTCGTACTTATTCACATTTTATCTACTGTTTACTCTAATTAGTCAAACAT
AATTTTTCCTAAGAGATAATGGTTTTTTTTTTTTTTTTTATCCCTA
>NODE_6640_length_35_cov_106.685715
ATAGCAAAGACATATTCGTATTTGACCCCTGACCTATGGAAGGAGACAGTGTTCACCAAG
GCCCC
>NODE_6642_length_82_cov_18.756098
CCCCATACCAGGAATTCACAGACTACCTGATGAAGAACCACTCCCGCACGGCTGTTCAGC
GCCAAGAACAGAAGGTCTATTAACATTAGATAGATCGGAAGAGCGTCGTGTA
>NODE_6662_length_92_cov_3.065217
TCGGATTAATGGTATGAGATGATAACAAGCAATGTTTCGGGCCAGGAAAGTTTTCAACAT
CAAAGAGCTACAATGGTTTAGAGATTTAGTTTCAACATCAAAGAGATCGGAAGAGCGTCG
TG
>NODE_6692_length_76_cov_30.302631
AACAGGATGGCCTTGGTGACCTTGTCTTGGATGAGATACACGAACGGACGGTCGACCTTG
ACCTCCCGAGCGTCGAATCTATCGGCCGAAAATCGGGCTATCAAGA
>NODE_6799_length_37_cov_79.459457
TGTTTCCTGACATACATGACACTATGCACGTTAGTCGTGATTTATTTCCCAGTCATAGTT
TGCCCGC
>NODE_6801_length_103_cov_40.689320
CAGTCATAGTTTGCCCGCAGACTTCAGGCCCGGTCTGTGGCAGCGATGACATCACGTACA
ACAACGACTGCCTCCTCCAGGCCGCCAACTGCGCCAACGGGCACCAGAACCAGATTACCA
TCAAGTACCCAGG
>NODE_6802_length_87_cov_32.781609
GCAGTTGGCGAAATCAAGTTGGCAAGGGTTACCGTACGTGATTTTGTCGGAGCCGCACAA
CGGGTCCCAGACCAGTGGGCACGACGGTGGGCAATTGGTTGGTTTGCACGCCCCTGG
>NODE_6848_length_82_cov_11.134147
AAAATCCTAAACGTAATGCATCGTTACAGACCTTCGCTCACAGATTAATGCACTACAACA
ATAAAACGGAAGCGCTGATACCTGAGATTTTAGATCGGAAGAGCGGTTCAGC
>NODE_6882_length_40_cov_53.500000
AACGTGACCAAGCTGAGGATGTGCTGCAACGAACTCGTGGCCCAGACGATGAGTTTCCAC
CACGTCCCGC
>NODE_6883_length_49_cov_43.102039
CCCAGACGATGAGTTTCCACCACGTCCCGCCCGCGTTCGAGGAAGCTCATGACGATGAGT
TCGAAGGTTGTTTCTGGGA
>NODE_6890_length_31_cov_11.451612
GTATCTGAAAAATTTAAAAAACAAAATCATGACGTCCTTTTTGCCTGGGCTCGCAGTAGA
G
>NODE_6891_length_31_cov_6.161290
CTATAAGTCTATCAAACTCTGAGATATCAATTATATAAGTTACCTCTATAAGTCTATCAA
A
>NODE_6913_length_40_cov_92.175003
GCAGATTTTGTAGTCGAAATAAGTTCCAGCTGGACATGACATTTATTAGATCGGAAGAGC
GGTTCAGCAG
>NODE_6944_length_35_cov_231.085709
GGGGGGCTTCTTTGAGTTACTCGATGATGATGCCTTCAATCAGTAGCCGTTGTAGCTGTT
TCTCC
>NODE_7015_length_34_cov_21.735294
TTTCATCCTTATTTCGATTTGCTCTTAAAGTATCCTGAAAGTCTTTATACTTCTTGTCAA
AACA
>NODE_7074_length_230_cov_158.173920
TCATACTTGTAGCACTGGCAGATGCACTTCCCCAGCTCGACCCACATCTCCTTGACGTGC
AAGTCTCTACAGTACTGGCAGTGCGCCACGGCCTGCTCCATGAGGTCAGGCTGGTCAGAG
CTGGGCACGGGGGGTGGGTGGAGCTCACGTTCCGCTGCTGTGTGCGGCACGAGGAGGCCT
ACAAGAGCTGTGACCAAGATGGCCGCGACGGGCGACCCGAGCCCAAACATCATATTTAAA
AGCAGTGATGTGCACGAGCT
>NODE_7084_length_261_cov_4.839080
ATGCTGTCAAGGACTTGTATTAATTGGAGTAAAATGACAGACATGAATGCTATTAATATA
AAAAATATCAATAAAATAAGAGTAACTTTAATTAATTTCTGATGTTTAAACCAGACCAAG
ATACATGTCAGGCCCAGTGTTCCCTCTAAGGTTCGTTGGTCCGNNNNNNNNNNNNNNNNN
NNNNNNNNNNNNNNNNNNNNNNNNNNNNNNNNNGTTATTCCGGTCTACTGAAGTAATGTG
TTCCGAACGATTATTTTATACTCTCACTGTGTACTACGTGAAAGTTTGTAA
>NODE_7098_length_176_cov_56.880680
GTTTCCTGGGTGGGGTTCAAACCCAGGCAGTACAGCATGTGACCTGTCTTGAAGGCGTCC
ACCTCACCGTCACGACCATCCCAGAAGTCAAAGAGCTCAAACACTTCACGGATCTCTTCG
ATCTCGTCTCTGGAGAGGTCGGTGGCCATTGTTTTAGTGATGTGTTGAGTTCTGGAGACA
AACCACGAATGTGGAGGAGAACAGAG
>NODE_7112_length_100_cov_26.520000
TTTATTGTTGTTTCCACAAACTTCTTATGATGTTATAGATAAATTATAGATTCATTTTCA
AACGCCGGAATCTCATATTTGGATGTTCATGAATTTGCAGATGGTCGAATACTTTTTGAC
TTGCGAGGTG
>NODE_7147_length_564_cov_15.347518
TGGTACTGTGAATATACAGAGAATCTAGAAAGAAAAAAAGATAGCCCAACCCCAGCAACA
GCCGAAGAAAGAAAAAGCAACCCCTAAGCCTCAACCTGCAGCTGAAGAAGAGGATGAAGA
ACCCAAATCGGAATCCAAAGACCCCTTTGCTTCTTTGCCTAAAGGTACCATGAATCTTGA
TGAGTTCAAGCGTGTTTACTCAAATCAAGACATCTTAACTGAAGNGTTGGGGATTCGGAG
TTGGACGTCGACTTCTTCTCCTACTTCTTGGGTTTAGCCTTAGGTTTCTGGGGAAACGAA
GAAACGGATTTCCATGGTACTTAGAACTACTCAAGTTCGCACAAATGAGTTTAGTTCTGT
AGAATTGACTTCGATAAGGGATGAAAACCTTGTTAAACCTAGCGCTCTTAATGAGTTAAA
CCATGACACTTATATGTCTCTTAGATCTTCCTTTTTACTGTAAATACCACAGATTAGAAC
AGCTCCCATACAAGGTCTCCAACCTATTCAAGTCTTTTTTACGAAAGCCCTCGTACCAAT
ATAACCCTCTTAGATTCTTCTTGAGGTAACGTCCTAACACCAAGACCTCCAGAG
>NODE_7176_length_61_cov_53.147541
TGCCGTCGGGGGCTGGTCAGTTGTGACACTTTGTCGATTTTCAAAATGTTCGGTTGTGCC
GGGCTGTAAGGCTCCCACTTGACGGCACCTG
>NODE_7177_length_31_cov_40.774193
GGCTGTAAGGCTCCCACTTGACGGCACCTGATGGCACAGTCGATGTCGGGTCACCCGTCT
T
>NODE_7178_length_74_cov_3.513514
CCCAATTTGGTTGGGCAATTCTTTTCCGGAGGTCAGTCCGGGGTCAAGACTCAGCTATGT
GGAATGATTGACAGTCTGCTTGGTCTGCTCACAGGGATGAGCGT
>NODE_7179_length_43_cov_64.000000
ATAGGGATAACAGGGTAATCTCTCTTTCTCAGAAGATCACAGTCACAGACCACCATAAGA
TTGAGTTCTGAGG
>NODE_7192_length_154_cov_1.785714
TGGATATTAGGCGCATTCCACAGGGTTTAGTAGCAATAAATCAGTGCGTGTGTGTTCCAT
ACGTTAACATAAACGAGTATATATTTAAACATTGGCTCCCGTAAAGAAAGAGATTTACCG
TTTCGGGAAAAGACCCTGCTACTGAAACTCACACACTGACATTGCATCAAATGACTCTCA
CCCG
>NODE_7193_length_46_cov_24.086956
AAAATAGGGATAACAGGGTAATACAAGAGCAGACGTTTAGTTGCAACACAGACCATACCA
AGTGAGGGATAACTGG
>NODE_7212_length_94_cov_2.117021
CAACACAGCAATACTGAATATGTGTTATATCATTCCAACTGTGATAAGGGGCCGTCCATA
AAGTACGTCACGCTCCAGAGGGCCGAGGGGGTGAATGTCACATGTGATTAACATAATTTT
GTGA
>NODE_7213_length_155_cov_6.748387
CGCAAGACCATCCAAAAGTACAAAATTGCAGTTGTGACGTAAAACATGTTTAACATAATG
CGCACTGTTAAGTCTCTATGTTTAGGTGGATTGTACCTTGCTCTCCGCTACACACAACAT
ACACAAGAGATGACACAAGTCTGTGTAACGATGCAATGTTTATTCTACTATAAACAACTG
TACAA
>NODE_7224_length_91_cov_62.186813
TTGCATTGCCCTGAGCTGTAACCATGTCCAGTTTGTGTCCAACTGAGTGGAGCGTAAAAA
CGTAACAAGTACAACGAGGGATCTATGCACAGCTGAGCAATCAATGCACAGAAACACCCC
A
>NODE_7258_length_96_cov_112.875000
TTTAAACGTCCGATGTGATTGGGCCAGCCCCGCACACCCCCTTATAGGCTACGCCAACGG
GTGGGCACACATGACAGGCGTTGCTGTAGGTGACCACATCTGTCCCACACACGGGGTCGT
ACACAG
>NODE_7415_length_41_cov_197.878052
GTCATAAAATAAGTTGTAACGCTGACCAACTCCGATGTGACAACCACAAGTGTATACCAG
AAACATGGCGC
>NODE_7583_length_87_cov_7.954023
ATCCCTAAGAACTGCTGCCCAGACTTTGGCTGTCACAGACCAGGGGTCAAAGTTCATCGC
TAACCTGCTCACGGCGATAGGATTTTTCTTGACTGTAACAGATGTTGTTTGCCTGAG
>NODE_7607_length_76_cov_3.092105
CATTTGTTAATTCTTCCAATCAACTCAACAACAATTTTTCCACCTCTGTGGTCGTCAACA
ATCTCAAATTCACCAATGTAACCGTGCTTTTGCATCACTTGGAGAA
>NODE_7608_length_71_cov_1.309859
CAATCGTCCAAACGTTTTCGTTTCTTTTTCGACGGTGATTTGTTCACAGTGATTTTGGGT
TCTTTTGAGCCAAATGGTAAACATCGAAGTTTCAATTTTTT
>NODE_7696_length_119_cov_11.226891
GTAAAAAAAAAAATCCAATACAATATATAATATAATTTCCCTCGATAACTCAAATGTAGA
ACAATGCTTCAATTATAGACTTTATATCTTACTATACAAAACATATGCATATTTCACGGT
AAATTCTAGATCGGAAGAGCGTCGTGTAG
>NODE_7697_length_62_cov_2.403226
CCCCATGCCAGTGGCTTTGTTCTGTTACCTAATATCTCCCATGAGAGAGGGTGAAATGAA
TAGAGCACATTTTTATGCTATTAACTGTTGTT
>NODE_7698_length_57_cov_52.000000
ATATTTATCATAATAGTATTGAGAGGTGTCAAAGTAAATGGTGAGGTTGCCAAATAGTTT
CCGCAGTTCTTAAAATGACAACATGTT
>NODE_7702_length_87_cov_230.827591
CCTTTGTGTACCTAGCTGCCGCCGTCTGCACGGCTTCTGCCTTTCTTCGCTACCAAGGGG
CCATACCTAACGGAGACATCGTCCCTGACCCCTGCCGTATCGGTGACTGGCCAGGCG
>NODE_7703_length_88_cov_128.897720
CTGGATGTGTCGTGGGTGCAGCTAAACTTATAGTGAGGTCGGTGTCCAGCGACATGTGGG
GTCACCCAGCTCTTGACCATTGGTCCTCCCATCCCTGTCCGAGTCTCTGTTACATAAG
>NODE_7704_length_67_cov_20.283583
TCAAGAAACATTGTGACGTTTACTAGAATGGACATTTCTCACAGGGATCTTTTTTACTGG
TAGTCGCGCATTTATAAGCAGTCATTGGCTCCACAAA
>NODE_7720_length_222_cov_13.414414
AAGTTCCTTGGTGTACACAACCTATGGATGACGCCTATGAGAAACACGTTGCGGTAGATG
AACCTAAAATCTATGACAGGGTCAATTGCCGATGTGTGGGAATGAATACAACAGACCTTA
CAACGAGTTCGACTATTCTGGTCAAAGGAATACCTTTTGTGGAGCCAATGACTGCTTATA
AATGCGCGACTACCAGTAAAAAAGATCCCTGTGAGAAATGTCCATTCTAGAGATCGGAAG
AGCGGTTCAGCA
>NODE_7736_length_31_cov_21.935484
CCGTGGAATGAATGAGCACACACAGGGCCGGCGTACATACAGTTGGCTGGGTGATGGCAA
A
>NODE_7739_length_170_cov_10.100000
ACAGTTGGCTGGGTGATGGCAAAGTAACGCTCCAATAAAATCTAGGTAACAAGACCCGGC
GCAAACTTCTAAATAACTATTTGTTCGTTGAGGAAGGCTCTTCGCCGAAACGTTCGCTGT
TGTGTTAAGTCCTGTCNACAAATGCGATCATCGGCCATGACCCCCACACCAATCGAACTG
CAGTAGTCCCAAAGAACCGC
>NODE_7780_length_131_cov_4.870229
TTGTTTTAACAATTGTGTGGGGCTACAGTTTAATGACTTGGACAGAACATTTTTTACTGG
AGCTGGTGTCTTTGCATCCGCACACGTGGTATTGATAACATCAATATGTTTAACAACGGA
ATTGAGCTTTTCACTGGTTTCGGCGCCAGATTTCTTGACTG
>NODE_7791_length_37_cov_154.621628
TCACAATGAAAACCATTGTCTGCATACTGGTTGTGATTTTAGCTGTTAATCTCGATGAAC
ATTTTCG
>NODE_7805_length_209_cov_44.631580
TGCGAAGAAGAGTGTAGACAAACATCCTACCATAAAGGAGAGTGTCTCCTTGCTCCCCGT
AATGTGTGCCCTCGTGTACGAGGCAATCAATACAAATGCTTGTGCAGTGGCAGAGACTAA
GGCATCAAGTCCTCCTGTTTTTAACAATGTCCAGAGGAAACATTGATTTATACAAAAAGT
TAGAAAGCCAATTTTACTCCATCATTTTTTATCCGAGATCGGAAGAGCGGTTCAGCAGG
>NODE_7839_length_41_cov_31.317074
AAAAACAACATAAGCAGGAGAGTAACTTAGTGAAATTAAAAGTATAAAATACACTTTACG
AATGAACAAAC
>NODE_7850_length_42_cov_269.928558
CTGCGCTGATGGCAAGTGAATCAAGACTCGAAGTTCCTAGCTTCAGTTCCTTCATCGGTA
ATTCTCTGGCAC
>NODE_7854_length_157_cov_11.076433
TTTTCCTCCACAGACCTAGGGCAAAGAATGAACTATTTTACAAGTTCAAAGTTTAATCTC
CCTATACATTGAGTTATGTAAATGAGTTGATAATATTGTAAACGTGATCAGCTTTGGGCT
CTCAGAGTCCTTGATTATTCACAGTTCAAGTCATAGACTGACAATACTTGACTAGACTGA
CAGTACT
>NODE_7915_length_75_cov_86.239998
AGATAAAGCCGTTTGTGTCTTCCTCCAAAGCACCGAATCCATGCACCCCAGTGAAGACGA
TAGAAGCGATTGATGACTCTGTGTTCTCTCCATTGCTTGTACTCA
>NODE_7955_length_41_cov_5.073171
AACTAAAAGTTATTGATTATTTTCAAACGCTACAAACATTGACAGACTGACACCGAGTGA
TGTCCCTTGTC
>NODE_7980_length_61_cov_39.786884
CTTCTCTTGCTCAGAGAACATGCTCTTTGTGGCCATGGGCGGCACCTGTACCTGCACCGA
GCTCCTGCGCCTGAGCAGAACTATCAGTATA
>NODE_8037_length_47_cov_48.276596
GAGGTAGAGCGCATTGTGACTGTAATGACCAATCCAAGGCAGTATAAAATCCCTGATTGG
TTCCTCAACAGACAAAA
>NODE_8038_length_41_cov_134.853653
TCTACCTCTACGACCTGTGGTTTTTGTGTGCTGACCTCTAACACGAAGACCCCAGTAGTG
TCTTAGACCTC
>NODE_8048_length_94_cov_5.212766
TTTTTTGGTAGGTTTCAAAACGAGAAAAGTATACGAAGCATTTGGTTTACAGAAGAAAAG
ATATTTACTCTCGCCACACCAGAAAATTCACAAAATCATCGTGTTTATTCTGAAGCAAGA
AAGA
>NODE_8049_length_189_cov_103.280426
TTAAGAACATGGAGACGTCAGTTCAGTTTTGGACTTTGGTGGTCACGGCCATTTGCTTAT
CAGCCTACTTCCACGAATGTTCACGTCTTATGAGGGGACCGGCCAGACGTAGGACATACG
TGAACCTGACCAGCACGCACAAGAACTACGGCAGCCTCGACGACAAGCTCAAGCTGTTCT
TCATCATCGCATTCCAGGACTTCACAAGATCCGAGTACT
>NODE_8050_length_195_cov_86.584618
CAGTAGAAGTAGTACACCGGACTCTCGCTCTCGAAGTAATGCCACGAGCACTTCAGCGGT
GACTTTGTTCCACCCGTCAGAAGAAGCTTGTGATAATTGGCGTGCTGTTTGATGAAACTT
TTGACGAATTCGAGCTCTCTCCTGGACCCGATCTCCACCAAGTACCCGCCTTGCAGGTTG
CAGAAGAGATTCGAGACGCCCCTGTTTTGGTTGGACACCGCCGAT
>NODE_8051_length_89_cov_1.842697
CATTCTCTATATGCGTTGATTTGAATTTTGGCTCTTCTGTCTGATTCTGGGCAAGTACAG
AGTCAACTACAGTTTGTTTACCAGCCATGCTTTTATTACCCAGATCGGAAGAGCGTCGT
>NODE_8083_length_104_cov_74.971153
TGGAACTTTCGATAATCCTTAAATCCTTACGCAGGACCGGTGGGACCCTTCCCAGCTACG
CCGCTGCTTCAGTCACAATATAAACGTTAGTAAGCTGTGTTTGGGTTCAAACAGGATAAT
AATTGGAAAACGTC
>NODE_8119_length_33_cov_179.727280
CAGAGACAAACAGAATATTGTTTCAAAGATGCCGAGGTCTACAGTTGGTCATCACAGTTT
GAC
>NODE_8145_length_122_cov_38.811474
GTAGCGATAACTATAACCACTCGGATAATGCCGACAGTTCCTGTAGGCTTGTTACTGCTG
TTTTATTGCGCTGCTGTCAAGGCGTCTTACGTCAACGAGTTCGACCAGCAGGCGTTGTTT
CACTGTGAAACCGGAGAGTACATCGAGGAGAT
>NODE_8146_length_49_cov_139.428574
CCTTTGGAGAAGAGACCCTCCTTGTACTGTGTGGTGGCCATGTCTACCCGGAGAGGTTTC
GGAATGTTGTCCTAACACT
>NODE_8155_length_40_cov_137.925003
TAGGGATAACAGGGTAATCTTTTTCCCTTCAAGACCCCGCGTGAGTGTTTATCAAGGGTT
GCTGCAATAA
>NODE_8193_length_112_cov_12.223214
CGGGTGGACCAGGAGCAGGTTTGGGCTCAACCACAGGGTCCAAGTTAACTTGAGCCTGTT
CGGCGACAACTGAGGGTTGTTGGTTGGCTGATGGTTGATGCACTGAAGGTTGTTCTACTG
AAGGTTGCTGCACTGAAGGTTG
>NODE_8194_length_125_cov_2.056000
GCTGAAATCTCAGACAAAGGGGTGCTTGAACATCAAATGGACGTAGCAGAGAAGCGAAGA
CAGACTTTACTTAAGGAATTCTTAGATGTTCAAATCCTCTAACGATGTGTCCATGAAACC
TCCTTGCTCTGTATGTGTGGTGTGAGAGTCATCGA
>NODE_8195_length_113_cov_1.451327
CGTCACTTCAATTAAACATTACACATAGTGCAAACTGATAGGAGAATACAGCAGGCAACA
AGCTGGCAATCCATTGGAGTCACAATCACAGCTCAATCGAGACAAGCAAGCAGGCAATCC
AACAGAGTCACTGGGTCAGTCAC
>NODE_8212_length_151_cov_118.503311
ATGACCTTGTGGAGAGCGTCGTAATCAGCGGTGGTGCAGCCGATGATGCCCAGAAGAGGA
CGGAAGGTCTCCAGCGTGGCGCAGGCGCTGGCGGGGTCAGAGCCGGACTGTGCCTCGACC
TGGGACCTGGCTGTCCTCTTGCAGCCGTCCGAGGACAGCTGAGTGTCTATGACACAGAGG
A
>NODE_8213_length_68_cov_65.647057
CACCTCTGCAACACATTACATGCACCTGACGGGAAAGAAGATGAGTATCTCTATCAGACG
TGGCGATACTTTGATCTCAGTCACCGACCAACCGATCT
>NODE_8241_length_34_cov_24.617647
ACAAGGGTCAAGGTACAATCGGAGACAGGCCAGCATCAGGATGACAACACAGATGCATGC
CATT
>NODE_8296_length_128_cov_155.679688
GCCCTTTGTTTCCACCATGGGGTAAATCCGGGGCGTTTCCACCAATCAAAAGGTCCATTA
ATCTTCAATGGCTTCCAGTCCCTCTTGCCAACAACAGATGTAACAACTTTACCCACTGCC
CAGTTCACGGCAGCATTCTTGACACCATTCCAAATCTT
>NODE_8302_length_41_cov_89.634148
TTTTTTTAAAGTACATATGTCATTCCATGAGTCATTCCAGGAGTCTTGTCATTCAATTGA
GGATGGTCAAC
>NODE_8315_length_50_cov_152.380005
AAAAGTGCTGGATATTCAGCTTACCCCAAATCATCTGCTGTATCATACAGTTTAGATGCT
TTTGTTTTCAATGACTTTGC
>NODE_8316_length_70_cov_4.371428
CGGGTGCGTGCGCGTGACCTTCGTCGCGGGTGACAACACCAAGCGCACGAAGTTCGCCAC
GTTCTCGTGGGCCGGCCCCAGCTCGAGCGTGCTGCGCCGC
>NODE_8317_length_50_cov_21.480000
CGTAGTCCTTCTCCAAGGCTGCAAGATCTTCACGTGCCTCGGAGAATTCACCTTCTTCCA
TGCCCTCGCCGACATACCAG
>NODE_8319_length_49_cov_18.632652
GCTGGGGAGGCCGCGGCCATTGTTACAATAAAAGCTGCTAGAATAATCTTCATGTTGTTT
TGTTTTTTTGACAGTTTAG
>NODE_8324_length_107_cov_187.364487
ATCTACTGTCCAGGAGCTCCACGACGTTCTTGTTGGAGTATGAAACACATGGAGACAAGT
CAGGAACAGTACTGATAGAATGAATGACCCTTTTAGACAGATGCTTTTCTCGCAATATTT
CTTTGCTACATTATCCA
>NODE_8332_length_31_cov_16.967741
TTTTAATGAATAGACTAAGCATGTGAATAGTGCTAATCCCAGTGATAAAAATCATATCTA
A
>NODE_8333_length_158_cov_93.006332
TTTTGTGGGCGAACTTATACGGAGTGCAATGCATTCCCCGTAAATGACGAGAGAGTTGGG
AAACCCTGCCAAACAATATGTAGCGACATGGGATTTCGAGTGGGGTTGTGTGTTTTGAAC
AGAAGAATGTGCAGAACTTACATCTATCGGGGAGAGCGAACAAAATACATGTGCAAGTGT
AATGACTT
>NODE_8334_length_32_cov_27.812500
AACAAAATACATGTGCAAGTGTAATGACTTACTGCCAACGACAACATTGGATTGGCGAAC
AA
>NODE_8355_length_126_cov_19.436508
GATGTTTAATGAATTGAGCATTATTCAAAAGAATATTAAAAAATCTCAGTAAAAGACCAA
CATGTCCCTGACATGATGAGACAAAGGTGTCTATTACCGAAAGACCTCAACTGAGCCATA
CGCCGGATACACCGCACAATCGTCTGATCTTGTCCT
>NODE_8362_length_97_cov_55.257732
TAGGTTGTTTTAGCTGAACTTTATTCACGTCACAGCAGCTACTTCACAAGACAGATATCA
CCATAAAGATGTCACTCCAGATGTCACCGCAGGTGGAGGGCAGAGGAAGAGGTTGCTAGT
GACGTCA
>NODE_8377_length_63_cov_59.873016
GTATTTTTCGTCGTTCTCATCCTCTACCTCATTGCTGGAGTAATTTTTCAAAAGTTTGTA
CGTAAAGCTGAAGGCAAAGAAATCCTTCCCAAC
>NODE_8378_length_31_cov_19.096775
AAAGCTGAAGGCAAAGAAATCCTTCCCAACCTCTCGTTTTGGTCCGGACTTCCTTCCCTT
G
>NODE_8385_length_137_cov_65.605843
ACGCCCAGAAGAAATGCGAGCCATGTTTGGAAAGTATGGACCCATCACAGATGTCTACGT
TCCTTTGGACTATTATACCAGACGTCCTCGTGGATTTGCCTATGTGCAATTTGAAGATCC
CCGGGATGCTGATGATGCACTGTACCATCTGGACAGGACACGTTTTT
>NODE_8413_length_108_cov_16.157408
CAACTTACTATATTCATCTTATCGTTGTGTGTAGTGTTAGGGACAGCTGCCGGTGGCCAG
TTTGGGACCTGTGTTGAAATGTGCGGTTATCACCTGTTTCGCCGTAACAGTGGTGACGAC
GGCTGTGGACCGGGCTTA
>NODE_8414_length_50_cov_101.139999
CTTACTCTGAACCTTGAGATCTGGAATCCGTCGCTGTTGTCGACCAGACTGACGATGGCG
CTGGTGGCGTTGGCAGTAAC
>NODE_8417_length_31_cov_151.193542
GTCTACAAATTCCCATCAGCCTTCTCCGCTGTTCCCGAACTCCAATGGGGCATCACTGGG
G
>NODE_8436_length_39_cov_184.794876
GTTAAAACATGAACTTGCTTACTGCCTGGGCCAGATGCAAAACACACATGCCTTGCCATA
TCTCATTAG
>NODE_8437_length_38_cov_224.236847
CACATGCCTTGCCATATCTCATTAGAGTGCTTGAAGACAGGTCTCAGGAAGCTATGGTTA
GACACGAA
>NODE_8556_length_44_cov_1.818182
AAAAATAGGGATAACAGGGTAATATGGACATGATGGGGATGAAAACGGGCATGGGTTCCC
TGATTCACAAGGAA
>NODE_8557_length_59_cov_195.474579
ACCTTGGTATCCCCCAACTGAGGATATACAGTCATTCAGCAGAAAGCATTTGCAACATTT
AAGATGAGAGATCGGAAGAGCGGTTCAGC
>NODE_8560_length_31_cov_22.129032
TTGCGTAGGAGGCGAATCGCGACCGTTGCTGGATACCTCGAAGACATCCCCTAAACTCAA
A
>NODE_8611_length_170_cov_4.017647
CCTCTCTCCAACTATCTTGCGTGAATGGTTGCAATTCCTGCAACTCGTTGACAGGCAAGT
GCGCTAGCTGTTATCCTTACTACACTCAAAAGGATAACGGACCTGCTGGAGGAATCGATT
GCGAGGATACCGTCGATGCTAAAGTAGCCGAACTCAACAAAGCCAACTCTGGTCTGCCAA
AGCCTTTCATCATCACAATC
>NODE_8646_length_74_cov_259.013519
TTGACGCTGTCTCATAGTCACGACACCCCTATATTTATGAGATGCCAGGTACCTGGGGTC
GGTCTCAATTTTACAGGTAGCCACCAGCTCACCATCTTTATCGT
>NODE_8651_length_107_cov_168.439255
AGTACTTGGACTGACGCCTCTCCCTACGCCCCTCGTCGGGCTTGTTATCGTTGAGAAGCG
CCTCCAGGAGCAGCTCCCTCAGGGGGGCCTCGGCAGCTCTTAGAATTACGCCTGGGTACG
ACGCCGAGTCGACTGAC
>NODE_8715_length_80_cov_2.625000
CGGACGGCGCCCACTCCTTCAACTGCGTGTGGAACTGCTCCTACAAGTGCTTCGAGTGCT
GCAAGGGCTGCTGCTACAAGTGCCTGACCATGTGCTGCGGCATCCCCCTC
>NODE_8716_length_44_cov_284.340912
TCTGAGGAGCATGTCTGCGTTACACGGTCGCAAGCAGGCGATCTGACGCTCGGTTAAGAG
GGGCGAACATTTTT
>NODE_8787_length_41_cov_213.902435
AACAGGTCTGCCATCACCCGCACAAGCTACGTTGTAACCTGCAGCATGTCTTTTAACAAC
AGGTCTGCCAT
>NODE_8788_length_48_cov_182.895828
CGTGCCCGTTGGGTAGCCTTTAGTCCATGACGCCAACACAAACGTGTTGGTTACCGGGTT
TATCCACTCGTCTACGTC
>NODE_8819_length_31_cov_25.161291
GGTAACCTATACAGTTCATCTATCTGTTCTCACTATGATACATCAGTCATGTCTATTAAA
A
>NODE_8832_length_164_cov_101.695122
TACAACACACAGCGAGTAAGTTAGACTGGGTTTAGAGAGTTTGACATGGAGAGAGCCCCT
GGGGTAGTGCCAGTCGATCTCACCGGAAGTACAATTCTTTGGGATGTTCACCTCAGCGAC
TTCTTCGGGACCCGAGAGACGGCTGATGGCACTGGTACTGCATGGGTCACCAAAAGGAAT
CGACACGAGAAGAC
>NODE_8869_length_131_cov_1.923664
GACATTGTCATGCCAGCAATTTTCTTCAAGAAGCACAACTTTTGCCGTCTAAAATAAGTA
GACGAATATTTCATGTTTCATTTCGGCATTATACATTGTCAATGACATGTCAACAGTTGA
CTAACAGATTAATCCAGTCAAAAACGAAAATAACACGAAGC
>NODE_8870_length_111_cov_9.873874
AGCAGTCCGCCTTAGTGACTGGAGTTCACCACGCCAGAGGGCCAGTAATACACTGCCCCT
GGTCTGTGTGAGATGATGATTAAGAATGTGGTAGTGTGCACACCCACACACTGCACACCC
ACACAGCGCCGCACCATGTGC
>NODE_8871_length_33_cov_6.272727
GAACAACTGTCCTTCATTACCACGTTCACTGGGCTAGGATATCAAACAGTTTTATTTCAC
CCC
>NODE_8875_length_285_cov_17.856140
TTTTTTGAAAGAGTATCCATAATGCTTTAATTACAGGAGAACCCAGATTAAGGCTACAAC
CAGAGTATCAGTCTCATTATTTTCAAATGATTTCATTGTTTCGGACAGTCGACTGCGAGC
TTCGAAAAAAACTCCCGGACATCGAATGCATCATCGGAGATCGACTGCANCACCTCTGAC
CTGAGCCATGTACACGTCTGGTACGGGAGTAAAAGTGGCTCGAGCTAACTTCAGTGGACC
CAGTCGGAGCGCTTACGCTCGCCGTAGGACCAGTCGAACCAGGGAAGTTCTATTTCACAG
AAGTCGCCCCAAAAC
>NODE_8952_length_45_cov_215.355560
TGACCTTGAAGACTGTGTCCAGGAATGTCACCCCAGCGATCAGGTGGATTTGGACACGTG
TTCTGCAGGCATGGA
>NODE_8964_length_36_cov_22.527779
AATTTCCTGTTATGAACTAATAGTGCAAAATATTAAATAAGAAATCTAAGGCCCACTAAA
CGAAAT
>NODE_8972_length_118_cov_25.889830
GCACCTTCAATTGTAGAGTACAGAGATAAGGAATACTCAGACCTATTTCAACCTAAGGGA
AAAATAAGGTCTGAAGAGAGAGGGGAAGAGACCTTTCGCGATCCGCTGACAAAAAATGAG
ATCAGAGACTTGCCTCCCATTAATTCTT
>NODE_8973_length_102_cov_10.833333
AGATCAGAGACTTGCCTCCCATTAATTCTTCTTTCACTAACAGCTGGAATACAACCATGG
AGTTGATTTTCACTTCAATAGCCAATATACCAGAGTCCACGGTCAACTACAGCCAACTGT
TGAAAAGGAAAT
>NODE_8998_length_38_cov_27.289474
TTCCTCTTGGTCATCTTTGTTGTGAGCATGGTCATCATCACAGACAGATCGGAAGAGCGG
TTCAGCAG
>NODE_8999_length_255_cov_5.423530
CATGGCAACGTTCGGCCCCTTCCGGACTTGCATATTCACTCTGCCCTTTGTGTTGGCCAA
CGACTACACAAGGATAGAGAACTCAGATTCCAAGAAGTCCAGGGTCGGCAGAGCTATGAC
GCTGATCGGAGCAACCTTACCGGCCATCTACATCATCGTCTCCAGCGTTATGTCCCCTCT
GATTGACCTGACCGGAGATCGGAAGAGCGTCGTGTAGNGGAGCCTTTGCAGTAAAGATAA
AATGATAAAAGATAAGATAAGATGTAGACTAAACGCCACTTATTA
>NODE_9000_length_130_cov_40.953846
GGAAACAATATTTGGGGTGAGTCGTAGTGACGGCCGATTCGTGGGAAAGGCTTGTTGTCC
TCCGTGTAGTAGGCGCGTTTGCCCACCCGGGGGTAACCTGGCTCGTTATTTTTAAAGTAG
AAAACTGCGCAACTGGTTCCGGCCATGACGTAAACAAATA
>NODE_9003_length_51_cov_226.980392
AAGACAGCAGTTCTTTCTGTGGTTCGCCGGTGATGGCAGCGACGATATCGAACTTTGGAG
TCACGAGTGTGTTGGTGGCCC
>NODE_9004_length_69_cov_253.913040
GTAGCAGTGGTCATGGTTGTAGCAACACTTATCCACATCGTCCTTGGGTGTGGTCCCTGT
CCCCCCAAGACCACAGAAACAGCCGTAGTTGAGGTAGTC
>NODE_9005_length_38_cov_89.184212
CGGCTGGATTCGCTCGATATGGAAAGCACTGCTTCCTGGAAAGAGGACGCGGATCTAAAG
CTTCAGCA
>NODE_9015_length_89_cov_54.348316
CTCGTCTGCTCCCACCAGTGAGTCCAGCACTGGGCCTGGGATGTGCATCCACTGGACACA
GAGGATCCACCGTCCAGCCTGTTGTGGACAGTCCAAGAACACATCCCAGTATCGCATGA
>NODE_9016_length_66_cov_79.863640
CAACCCACGCCCCGCACGCTGCCAAATGTGTATGGGATTGTTGCAACTCATCCAGCTGTC
TCAACACGCACTTCGGTACCACTTGGAACACAGGAG
>NODE_9017_length_32_cov_130.781250
CGCACTTCGGTACCACTTGGAACACAGGAGCATTCACAACGCTGAACCTAGGTCATATTT
AT
>NODE_9019_length_79_cov_88.696205
AAAAAAGGTAGGGCTGCCACCACGCAGGTGATGGACACAACGGGTCGAAAGTCTCCTGAA
CGTTGACTGCAGTTCAAGGACATGCTCCAGACCACACGGGTGTAGTTCA
>NODE_9020_length_141_cov_58.148937
TTTCAATGTTCCTCAACCTGTACAATAATCTAACACTCTGTCTCAATCTGACCTATTTGT
CACAGAGAAGCCACTTAGATATTGTCTATGATGATGACGACGGTGGTAATGTTTCGACCA
CATGCACAATATGCAAAACAATGTACAACTCTTTGAATGATTTCTTCAATA
>NODE_9022_length_38_cov_132.605270
GAATGATTTCTTCAATAACATGGATGATCGTACTGGCAATGGAATCTGTATGGATATTGT
TGATATGA
>NODE_9041_length_285_cov_84.677193
CTTGTAACTGACATGGGGTTTGACACAGACACATTTCAGGAACTCACTGACAGGAGGACA
GCCAATGACTACGAGAGGTTGACGAGGGTCACGTGGAAGTACGCTTGCACCCGTGGTGTT
GCTGGAACCCCGACCTTCTTCATCAACGGAATCGCTAACCTGAACATTGGGAGCAAGTGG
ACCCTGAACGACTGGACGACATTCATTGAACCTTTACTCGTCCCTCAGATACTAGATGAT
ATCAGCGGCGTCGCATCGCCCAGTGAAATCAAGCCAGCAGGCAATAGTAACAAGATCGGA
AGAGCGTCGTGTAGG
>NODE_9044_length_750_cov_13.248000
TGCAGCTTTTATATCAAATAATGTAGCATGAAACAGTTTAATATTAAACAAATAAAACAA
TGTATAATGTATAAAACTTGAGCTAGGTACGATGAAAATATTTTTTCAAGTACTCCGAAA
AATCCTTGATCAACCTAGCCTTGACCTGTTTATGGACAATGGAGGTAGCTTGTTGTAATT
TAATTAAAGCAATTCACTGCCTTATTTCACATTCATCTTAGAGCTGCTCTAAAGTCTTAT
GAGAAAAGGTTTTCCTTTCCATGACTGTAGCTGTACCATATGGGTGCCTTGAATCAAAAC
TGTGTGTTTTGTTACAGCATTTGTAAAGCTCACATGTCAAGTTTGTCATGGTGCACATAG
TTTATCAGCAGGTATCACTGCACAGTGGGGAAAATCTTCCTGAACTGTTTNAAAGTTGTG
GGTCCGTAGGTGATTCACTAAAATTAGTAAATAAAAAGAAAAGACGTATGAAATCATCTT
GGGTTAGACGTAGAAGTTGTCGAGAAAGGTAATAAACTAAATAAGAAAGTAAAAGTCTAA
GTAGAAGTACCGAAAACTAGGGGTAAAAATACACTACAAATATCATTCCAACTCGGAGTC
GTCCATCAAAGAATTGCGTAGAATTTTCTATAGATATATCGACTTCGCCCCTAAATTTTC
GTCCGTAAAAAATTGTTCTCGATTATATTTTCCGGTTTTCGATTCCAATTCAATACCAAA
AGTTCAAGGTTATATTAAATTTCAATTGCATCTAACTGGAAGACACTTGTTTTAAAACTT
>NODE_9048_length_59_cov_56.186440
CCAAGAACATTCAAAGCTGAGAAAGCCAGAAAGCCTTCAGATGATGAGCGTAAACATAAC
GCCTTTGTTGCCCTACGTCAAGCCAGAAT
>NODE_9066_length_31_cov_212.580643
GACAGCGATCACATAGTTGCCAAGTATTTAGTCGAGAGCACCCAGCCACCGAGAGATGCT
G
>NODE_9069_length_32_cov_20.625000
GAATGAGCAGATTGCCATTCCGCAACATTCGATAATGGTCGCCTTCACTAGAAACACCTG
GT
>NODE_9070_length_31_cov_14.741936
TAATGGTCGCCTTCACTAGAAACACCTGGTTGAAGATTTAAATTGCTTCCATCTTTCAAC
C
>NODE_9077_length_654_cov_8.461774
CAGTGAGAAAACAATGGATGTTGCTTTGGAATATGAGAGGACACTCAATGAGTTTTTCCT
AAATGTTAAAGACAGCGTGAGATCCATTCCATCCTTTGGGGTTGCTGCTTTTGCTAAGTG
GTCAGAAGAAGAAGTCAAACTGAATGAAAAATTCCAGGACAAATGCAAGAGTGTTCACAC
AGCTCTCTGTGACAATGTTGATACCAGAAGTGCTCTTGAACACATTCGTGAGCTTGTATC
TGCTGGAAACTCTTACATGTCAGCTGCACGAACCAGCCACAGACAAGTAAACAGAAAGTT
ATTGATGAACATTGGGGCGTACATTACAGATCTGCTTAAGGTTTTTGGTGCTGTTCCCAA
GGATCAAATTATTGGATTTCCTCAGAGCGGTTCACAGAGTGCAAATGTAGAAGAGACAGN
CCCCAAAAACCACGACAAGGGTTCCTAGTTTAATAACCTAAAGGAGTCTCGCCAAGTGTC
TCACGTTTACATCTTCTCTGTCACTACGGAATAGAGAGTCGTAATCGTCTAAAGTCCCTG
TCTTATTCTAGTGAACGATTCCTTTGTTTTGTCTTTCTGTAGAACAATCTTACACTGTTT
TAGTCTCTACTACAAAATGGACTGGACCCACAGTCTAATCTTCTAGTACTTCCCTGTGGT
TGTCAATAATTTGAACAACTGTTT
>NODE_9081_length_67_cov_239.477615
CACATCAACACCTCCCCAAGTCTGGACATTGCCGACGCCAAAGTTGTAGGCAGCTACACC
GCCTTGGAGAGCTTGGTCAAGCGTCCATGTGGGATGT
>NODE_9103_length_113_cov_3.548673
GTTTTCGTGATGTTCAAATCGGTGATGTGGTAACCATTGGCGAATGTCGTCCATTGAGTA
AAACCGTTCGATTCAATGTACTCAAGGTCGCCAAAGCAGCCGGTTCGAAGAAACAATTTC
AGAAATTTTAAACACAAGACAAC
>NODE_9108_length_51_cov_45.941177
TGCATCATGGCACTTCGTTTTCTTTGATAACTTCAATTACATGTGTTTAATGTTAGCCCT
CTCTTTTCCCATAAAGTTTTT
>NODE_9121_length_88_cov_66.000000
CCATGTGAAAGCTCCTCTTTCCTGTTCGTCACCAGCGTGGAAGCTCATTCCTACATCTGC
CAGTACACACCAGTAGGCAGTACCCAAGTACCATTAACCACTATCATCTTTGTGACGT
>NODE_9229_length_152_cov_3.638158
GGGTAATGCATACACCAACTCTATGGAACTATAACGTGTCTTATTCGCACACAACGTTAA
GGACGCAGGGACTGACGCGCACAACTTGCGTCTTTAAAGGACAAGTATATTCATCAAGCC
TGCCACTTATACTGTATGTGTCTGTTGCTCCCAATGTCACATCTTACAGATCTCTAACAT
CA
>NODE_9230_length_77_cov_2.740260
TGTAAAACTCCAGGCGTGACCAACGGGGGCCGTCATACTGGCACGTGAAGGTGATCGTAC
CACCGTCACAGATCTCACGGTCGCTGCTGTTCAAGTTGACTCGCGAG
>NODE_9231_length_75_cov_1.680000
TAAAAGTAACAAGTATTAGTTAAACGAACGATTAATTTCACAATTTTAAAAACGTGAAAT
TTTAACAAATGAAATCAAACGCCATGTTCATCCTCGTCGTCACCG
>NODE_9233_length_58_cov_51.637932
AACGCCATGTTCATCCTCGTCGTCACCGCACTGGCCACACTCCTGGCTGTTGGCAACTGC
AACAAAAACTTCACCATCACATCAGAGG
>NODE_9234_length_82_cov_92.987808
CATCTCCACACTGGATGAGCATATCTTTGACCAAACGGTGGCAGTATGTGTTCCTGTAGC
TGATCTTGGCTTGGTTTGGTCTCTTGTAACCTTCACACAGTGTCTTGAAGTT
>NODE_9250_length_59_cov_35.813560
CTCTGTCTTGCTGCCAGAACGTTGAACAATGATGTAGTCTCGAGGAGTTAAAACAAATTC
TCTGTCTTGCTGCCAGAACGTTGAACAAT
>NODE_9251_length_163_cov_2.858896
TATGTTGACTCAGAACAACCCACTTATGCATTTTCACCCTGTGGGCACATGGTTTCAGAA
TGTACCGCTAAGTATTGGTCAAGAATAGCTGTACCACATGGCTCACATGGGTTCCAGACC
ATATGCCCTTTCTGTGCTACACCTCTGTCTGAATCCACACCATATACAAAACAGATCGGA
AGAGCGTCGTGTA
>NODE_9283_length_175_cov_3.251429
CTGTCATAATCATCATTAGCTGTGTATGTCCCAATGATCCTGTAATCCTGAAAATCTTAT
GTCCGCTCAGAACGCTATTGAGTTTGTTGCTATGATGACGTCTTCCATGTTAGAATTATT
AAACAGTTGTGTCTTACCTTTACAAACTGACATCACTCAACAGCTGCAATGTGTCAGTCA
GACTCAATCAATTATGGGAAATAGG
>NODE_9464_length_48_cov_73.437500
ATCAGCTTGGGTTAACAGGACGAAAGCTAAAAAAAAAACAACAAAAAACATAGCTGCCCT
ATCAGGAAAGAGAGAAAT
>NODE_9506_length_71_cov_95.140846
ATGGTTCACGTCCAACATGGTTGGATCAAAAGGTGAGGACTTATTTAGGCAGACGTTTCA
GCTCATGTGCCAACCAAACAGCAAAGCTAAGAAGGACAAGA
>NODE_9508_length_31_cov_3.709677
AAAAACATACACAACATACAAAAGTGAATAAAAATTAAGGCAAATGGTGGAAAGTTTTTT
T
>NODE_9509_length_102_cov_4.049020
AGGGGAACCAATCTGCCGTACAACACAGTTATGTGCTCTCTGTCCATGAGGATGAGGCCC
AGCTTACTGTTGTTGTACTTATCATGGGCAGCTTCGAGTAGAGCAACCTCATAGAAGCCA
TAGAATCTGCCC
>NODE_9517_length_31_cov_1.838710
TCTTCCGCATGTTTGATGAGAACGGTGACGAGTCAGGTCTCATCAATTGCATCTCAAAAA
A
>NODE_9542_length_102_cov_91.362747
CCCTTTTCAGCCTCGGCCTGAAGCACAGCTTGACCTTGACCTCGGCTGATAATAATCACG
ATCAGTTGATGGTTTTGGAAGACGATGCCGGCGGGGTGTCCATCAACACAGCCAAGATCG
TCCAGAAGGACG
>NODE_9543_length_158_cov_89.000000
TTTGGACAGCAAAACATTTTTTCTTGATGATGCTCGTTGAACGAACTAGGAGCTTGTCGC
CTGTCCCTATGAATCAACCAACAACGATGCCGTTATCGGCAATGTTGATGAGAACTCGGG
GTGGAATCAGCAGCTTGTTGATGACGTGGATGACTCCGTCGGTGGCTATGACGTCCTTCT
GGACGATC
>NODE_9553_length_423_cov_5.047281
GCTGGATCGGAGGCAGCAGATGCCCTTACTTCGCCAACAGAGGTGAGTCCGCCAGAACTG
AGGCTTCTCCTAGAAGAGACTCAGCTAGACCATCTTTCTGCTCAACCATGACCGATTCAA
ACTCTCAGGCCCATCAGACACAACCAAACACTGAAAGGCCAGCATCCTTCAACCTGGAAC
ACTTATTCAGAAACGCTAGAATNCTTTCCGGTCGTAGGAAGTTGGACCTTGTGAATAAGT
CTTTGCGATCTTAGGGTCTCTTAGACTCTTTACAACGCGTTTTACAACGAGGAGTCGACG
AGTCAGTGGACTGATCTGAGTGGGTCGTTGTGAGTTGGGGTCGAGTCGTCGATCGGGTTC
GACGAGGTTCTCTGGGTCAGCTTCTAAACTAGTTGTCACGACTTCTTCAAAACCCTCATC
AACTGTCTGTGAAGGAGTCCCTAAAGTAGTAGT
>NODE_9554_length_31_cov_1.000000
CCTGGAACACTTATTCAGAAACGCTAGAATACCAGAGAATCTGAGAAATGTTGCGCAAAA
T
>NODE_9561_length_67_cov_41.850746
TCTGGCTTGGAGACGGCATCCTCGTATGACGGTGGTACGCTGACGACGTCTTCATACGAC
GGCGGCTGGATGGTGATGTTGTTCTCCTCGTCCTTGA
>NODE_9582_length_31_cov_93.483871
TCGCAAGAAAATTGAAGAAAACTAAAAGACTACAAAGTCACTGGACGACAAGTGGTCACA
A
>NODE_9616_length_65_cov_92.507690
CAATCAGCATGAAGTCGATTATTTTGTCAGTAGTCGTCGTGGCAGCCGTTCTGTTTCTGG
CACGAGCAGACGATGGGGACTGCATCCGAGAGTGT
>NODE_9618_length_32_cov_223.312500
AATACTTTTTGTGATAAAAAGGAATCGTGCTCGCTTATAAATGGAATGGAGACAGGACCA
GA
>NODE_9619_length_143_cov_50.055943
ACAGAGTTATCCGGAGTTTGTCGTTAGCGTTTATAAAGAAAATGCCGCCTGTGTATGACG
TCTCTTCACTGCGGTTACAGCTGGGACAGCACGTGTGTACAGATCTCAGCAGCACACCTG
TGTTCATGGGATGGTTCGGACTCTCTCGATTAACATAATGAAACCAGGTCTGG
>NODE_9627_length_50_cov_116.760002
TTTTTTAGCGATTTGATCAATCATTTCTGGTGTGTTGTACAGGGCAAGTTGTCCGAGATT
ACTTAGGCTCAAATCCAGTG
>NODE_9687_length_47_cov_122.340424
TTGTGAAAATGGGCAGACAGATGTTGGGTGCTACCAATCCATTGGCTTCTATGCCAGGCA
CCATCCGTGGTGACTTT
>NODE_9837_length_38_cov_84.000000
TACGTTAACGAAAAGACCTGCACCAAAACAGCAAATATGCAATATAACAAATCATCTAAG
TGCTCTAA
>NODE_9841_length_47_cov_55.829788
AACAAATCATCTAAGTGCTCTAAGGTTGACTTCCTGTGCTTCATCTGTAACAAAATTGTC
TCACCAGCCATTGTTTA
>NODE_9842_length_146_cov_48.842464
TGTATTCAGCCTCCATTGTGAGGAGCATATTGCGTTCCTTTAACAGCACATACCAGAGCT
TGTGAAGGTCTTGATTACTTTTAATTCTCAATTCATCTACTCGGTATGGTCTTCCTGTTG
GAACGCTGGACTCTGCCCAAAATTCTTTCCTGTCAAAGAACTCCATGAGATCATTA
>NODE_9849_length_45_cov_190.044449
CAAAGTTGAATCGTACAACCAGGTCCCTTCTTTCTGTAGATCAGTTGCTGCCAGCCAGAC
CAACGAAGGCGGGTT
>NODE_9875_length_103_cov_87.699028
GGTAATGTACAGATTTATTCCAGCAAGTAACTGTCACAGCTTATCTGAACCTGCTACCAT
CCATAGAATAACAAATGACTCAATTCTGCTCTCTGGGTGCACCACCGCCAAAGCCGCCAC
CCCCACGGCCTCT
>NODE_9919_length_31_cov_20.838709
ATGATGTCACCAGCAGGAACAGGGCAAGAGTGGGAAGGACGTACATGGCGGGAAAGTTTG
C
>NODE_9923_length_39_cov_133.025635
AACGACAACCGGTGGAACTTCACCTGCAGCACCTTACCGACGGACACTGTGACCGTCCTC
AGCAACTGT
>NODE_9943_length_38_cov_175.789474
AAAATGGTCTGTATGGACACACCAACACAGAACGACTCCAGATTGACCAAGTGCTCGAAC
TCATCCTG
>NODE_9951_length_486_cov_15.131687
GTGGCCGAACTCCTGCACGGACCAAGCCCCCACCCACCACCACCAACCCCAATGAAAAGA
CGACCCTTCCGCCGACCACAAGGCGTCCCAGCGGCTTCAGACTGCCGTGTAACCTGTATG
AGGAATCTAAGGCGGCCTGCCTCAACGACGGAAAGTGTTTCACCCTCGAGCTCATGGGAG
AGCGGACGGCCCACTGCCAATGTCATGAGATGTACAAGGGATTTCGCTGTGAAGTCATTG
ACGGCGACATCTACGTGTTCTCTGCGGACAAAGTTGAAAAAGCAGGTATCGCTGCTGGAG
TTGTTGCCATTATTATCATTANCCATAGCGACGACCTCAACAACGGTAATAATAGTAATA
GTGTCAGTAGTAACACATAGAGCAGTAATTTTTTTCTTTGTTTTCTTTTTCTCTCTGTAA
TCGTCTTTTGCCTCTACGATTACCTGTACGATCGTTTGAAAACCTTTTACTAGGTCTGTT
TCCCCATTTAATATTGCTATAACTTTACCTTTTTTT
>NODE_9996_length_84_cov_63.154762
TTAAACACTTGCTTTAACCACAGAAATCAAATGGACAAGTCGTTAATTGTTTGTGTATTA
GCCTGTGTGTTGGCTGGGACAACGGCTCTTGTTGGCGAGGAATGTGCCACTGAT
>NODE_10060_length_127_cov_2.370079
GTTTATCCCCAGCTGCATCAACAGCTTGTTTGACACCGAAGACATAACTCTCAAGCTGGT
TCCTGGCTACCACACGCTCCTGCTGTTTCTTATCCTCTTCTTTGTACCTCTCTGCCTCGG
CCAGCATTCTGTCAAGACATTAGCAAAGTCTTTAATT
>NODE_10061_length_59_cov_44.186440
TCTGTCAAGACATTAGCAAAGTCTTTAATTTTCTTGTGATTTTTCAGCTGCTTGACAAGA
GTTAGAATTTCATCATATCTCTTGTCTTT
>NODE_10062_length_92_cov_74.586960
TTTTTTAGAGCTGGCTCAGACAGTGAGAGTGAATCAGAGTCAAGTGATGATGGGGTACAG
GACGTACGCCCTATTGCCCCAGCAAGGGCAATGCAATTCAGTGATGATGAAGAAGAAACA
AG
>NODE_10089_length_118_cov_272.745758
TGCCGTGTTATGAACAGGGTGGAACTTGTCTGTCCGTCATGTCCATGATCCACTGCCCAC
AGAGACTCGCGGGTTCCTGTGACAGCTCCAGTCAATACTGCTGCAAGCTGCAGACACTTC
AGACAGCGGATTCCTTGCACCTACAAGC
>NODE_10096_length_210_cov_109.538094
CTTTCCCCAAAGATGACAAAACTAAACCAGTGCATTTAACTGCCTTCATAGGCTACAAAG
CTGGCATGACCCACATTGTTCGAGAAGTTGACCGCCCAGGATCTAAAACCAACAAGAAAG
AAGTTGTCGAGGCTGTTACTATTATTGAGGCACCACCAATGGTCTGTGTTGGTGTAGTAG
GCTACATTGAGACCCCTACAGGCCTCCGCACGTTTAGAACTGTTTTTGCTGAACACCTTA
>NODE_10101_length_252_cov_68.476189
GCTCTGCTTGTGTCCAGCTCCGCTGATTGCCAACCTGTGAATCAGAAGTGTAATCTCAGG
ACTGAGCTTGGAATTGTCCTGGACTCCTCCAATTCTCTTAGTTACGATGATTTCGATAAA
GCCAAGGAGTTCGTGGTACAGTTTCTCAGTTCTTTTGACATTGGGCCCAGCGATACGCGT
GTGGCTCTCGTGATGTACGGCAACGATGTTGACCGAGATAGCGCCATTGGACTGGCTGAC
TACAAAGACAAAGACAGCCTGCTCAACGCTGTGCGGGATTTG
>NODE_10152_length_71_cov_1.760563
CCCGATTGTGTCCCTTATCCTAACTGAAGAAGAAAGGGATCTATTATTCAACCACGTGCT
TCAGACGATACCTGAAATAAGAGACGGAAAAGACAATCCCA
>NODE_10215_length_177_cov_124.966103
TTTTTCCCTTCGTCGCCATCATCAGATTGCCAAGATGGTGCGTATGAATGTATTGGCAGA
TGCCCTCAACTCTATTTCTAAAGCTGAAAAGCGTGGAAAACGACAGGTGTTACTGAGACC
AGCATCCAAAGTCATCGTAAAGTTCCTAGGTGTAATGATGAAACATGGTTACATTGGTGA
ATTTGAACAGATTGATGACCATAGAAG
>NODE_10253_length_40_cov_24.475000
TGCCGTACAGTCGGGTCTGTGATGGTGTGAGGGATTGTGTCGACAACTCGGATGAGACCG
AGAATTGCAA
>NODE_10255_length_78_cov_20.205128
CTCGGATGAGACCGAGAATTGCAATTTCTGTTCATCTGGGCAGTTTCAGTGTGTCGGTAT
CAAGAAATGTGTCCCGTCTTCGAGTCGCTGCAACAACATAAATGATTG
>NODE_10352_length_95_cov_3.347368
GGCGTTATCAACAAATAGCCAGTGATAATGTCCAGCAGGTGGTCAGACCTTTTTTGGATG
TAGGTATTGACCATGAGATGACCAGCCCTCTTGTGGACCATGGTAATGTCCGTTTCGTGA
CGAGT
>NODE_10353_length_63_cov_2.984127
GGGCTTCATTCTGTACCGGCGGACTCGTCACAAAACGGACATTACCATGGTCCACAAGAG
GGCTGGTCATCTCATGGTCAATACCTACATCCA
>NODE_10385_length_99_cov_44.828281
CCTGTTATCCCTATTTTTTTTTTTTTTAAGGATTCTCACAATTTAATTATGGTACACCTA
AGCTGGAGTCTTTGATAGGTAATACATTTGTTTGTGGGAAATCTTTAGCCTCTTCTGTTG
CACTGTCTT
>NODE_10394_length_38_cov_19.500000
CCTCATCTCGTCCTCTTTTGCTTTCACTGCGTTTTTCAGTATCTCTTTCTTCCCTTGGCT
TAGATTTG
>NODE_10395_length_170_cov_15.982353
TCATGTAGGCAGCAAGTGGAGCAAGAGTCGTAGCCCGTCTCCACCAAGAGATTCCTCAAC
TGCTAAGAGACAGAGAGGGTCATCAAGTCCTGTACAAAGATCTAGACCCAGGGATTCTCG
AGAAGTGGAAAGAATAGTTCTAACTAAAAGGGGAAAGTCTCCAACAAGCAGTTTGTCCAA
AGGTAGTGGAGACAAATCTA
>NODE_10503_length_39_cov_257.282043
ACTACCAGGTGTCACAATTGAGAGCTTGGGGGTGGCAGTCCTGGAAGGCCTTGTTGGCCT
TGACATTGG
>NODE_10554_length_64_cov_110.390625
GTTGCCTTGAGAACACAGTACACGTATTCACTCGTTGACCAATGGTCAGCCCCACACATA
GGGCGACTAGCACGAAGGTGAAGGTCAACCAGCT
>NODE_10596_length_41_cov_107.536583
CAGCCACAGCACCTTGAAGTGCTTGACTTATTGTCCAGCTGGGAAACTTGGCATGGACCT
GATTGACGTAG
>NODE_10597_length_31_cov_13.064516
CGAGAGGGCCTCGTCAGAAGTTCGCCCCGTGTATCCTATATATCAGCCGCGAGTGTTCAT
C
>NODE_10598_length_420_cov_8.900000
AGAGATTTCGGGGATGGCATTGACGACAAGACAGTTGCTGACAAAGAGGAAGTGTTGTAC
AGAACAAAGGGTAAAAACACCATTAAAAATAAGGCTGTCAAGGGCAGAGAATCTAAGAAA
GAATCAGGGGAGAGAACCGGATCTAAGAAAAGTCAAGCGCGTGTACCAACTAATTACAGG
AGAGCGTCTCAAGGGGGCAGTTCGACAAGAACCAGGGGCGTGAACTCACGCTCATCGCGA
CAGAGATCATCCCGCGAGAGGGCCTCGTCAGAAGTTCGCCCCGTCTATCCTATATATCAG
CCGCGAGTGTTCATCCAGGACAGAAATATTGGCGCGATGGATTCAAAGGAGATGGCAGCA
GCCCACGGGAGGAGCTTTATCGGCACGCTGGACTCTAAAGAGATGGCCGAGTCTTATGGG
AGACAGGATAAACTGGCCCCAGTCAGGAGC
>NODE_10619_length_56_cov_99.250000
TTACACGCCTTCAGTGAGGTCACAGATGCGTGTGATGAGGCTTGTGGTTGCATCTCCCAA
TCCATCGTAACTGGCTGCTCTGATGA
>NODE_10622_length_46_cov_8.673913
AAAATAGGGATAACAGGGTAATATCTATAGCTGTGAATGGGAACACAGATGTACAAAAAG
GCATAAAACAGAACTA
>NODE_10645_length_80_cov_6.775000
ATCTCCCACACCATTGTTGTTGGTTAGTCCGATTAGCATCAAGTTACCGAAGGAATTCTG
AGTCCATTGTAAGCTGAGGGGACGATTACCCAGATCGGAAGAGCGGTTCA
>NODE_10716_length_87_cov_11.390804
AAAATAGGGATAACAGGGTAATCTAGTCCTATCACCCAATGACTGACATCCAGACCGAAA
AGTACTTTCAAAAGCAAGAAGCCTTTGACATTCAGAAATAACCAGATTGAGACATTC
>NODE_10727_length_67_cov_11.119403
GTAAACCTGAAGGCTGGTGAGTTATTTCACTAGTCTTGTTTATTTTTAGATGCCTTGTTC
TTAGAACAAAATTTGAATACAAACTTAATGGCAAGAC
>NODE_10729_length_40_cov_29.125000
ATTTGAATACAAACTTAATGGCAAGACTGAGCAGTAGAAACACAACCAATAGGACACCAG
TGAGGAATGC
>NODE_10735_length_43_cov_122.558136
AAAAATAGGGATAACAGGGTAATCCATGGAGGTCTGTGTTATCAGTTCGTCCTAACGCCA
CACAAATCCCACA
>NODE_10736_length_87_cov_160.298843
ATGTCGTTGAGGCCGATCCAGACTTTTCCCCATGTGCTCTTGTACGTGTGGACCATCTCG
CCGTAGATGTAGTCCTGGATGTCTTTAGATGAGACGATGGCCAAGGTGCCACCGTTG
>NODE_10743_length_118_cov_61.483051
GAGAAACTAATTTATCTCTGTACAGTGTTGCTGCTCTACTGTGGTACTTTTTTTGAGCAT
CAGTGGTAGTGCAGCCATGTTGTTGGAAAAAGGCTCTAGCATTGGCATTCCCTCCAACTT
GCATTGCCCTGAGCTGTAACCATGTCCA
>NODE_10744_length_248_cov_16.153225
TTTTTGTTTTTCATGTTGTTTGTTTTTATTCTTATTTATTCTTTTTCCCCCATCGGGAGA
TGTGAATCATGACGATGAACAGCAAAACAAAACAAAAGAGGAAAATAACAGGTTGTTCGC
TGCTGTTATCGAGAGAGTTGTCTTGTGTTTAAAATTTCTGAAATTGTTTCTTCGAACCGG
CTGCTTTGGCGACCTTGAGTACATTGAATCGAACGGTTTTACTCAATGGACGACATTCGC
CAATGGTTACCACATCACCGATTTGAACATCACGAAAA
>NODE_10745_length_36_cov_13.055555
GGCCCCTTACTTTCACCAAGAGACAACACCTAAAATTCTTATCACAACATCAGACAGACC
CAAAAA
>NODE_10792_length_145_cov_1.689655
TTCTGCTCGACAGGCTTACCAAACAAAGAAGTTCCAGGAGTTCCGAAAGCTGAGCTGCTT
GTGCTGGCATTAGAAAAACCAGAGTTACCAACTGTTCCACCAAATGAAGAATTTTGAACG
CTTATGTTTCCAAATACTGATGACCCAATGCCAGGGGCAGCTGATCCAAATGGAC
>NODE_10866_length_135_cov_47.755554
AAACTCCAACTTACAAAAGCCATAATCAATAACACACCTGTTTCCACCAGAGTAAGGCTC
AACAAGGAGACTGTATTGCAGTGCGGAGAACCAACCAACCTTCTCTGCATTCCAACCAAA
ATACTTCCCTAAATCTGCCACGCCTGTAGTTTTGTCCAACTGAAC
>NODE_10867_length_35_cov_46.857143
CAGGATTTGAAATATCTAACACTATTATCAGCTCCAAAATCTACGTAACCATGGATGCCT
TCTAT
>NODE_10886_length_92_cov_61.217392
TCAACTACTTCTTCCACGGCTCCGAGCTGTCCACCAAGCACGACTGCTGTGCGACCTTCA
AAGTGTGCTACAAGGTCACCGTCTGCAAGACCAAGTGCAGGCCGCCACCCAAGCATCCAA
AG
>NODE_10887_length_70_cov_350.871429
CATCAAGCCGCGAATGTCTGCCTCCAGCCACCACTGAAAGGCTTCGCGAGGTGTTCCGGA
GATTTCCGGAGGTTTCACAGATCGGAAGAGCGGTTCAGCA
>NODE_10893_length_71_cov_1.943662
GGTCTTGCTAGCACCAGGTGTGCCAAATTTTTTTACATGGAAGATAAAAATGCTGAACAC
ACTCTCCACTTAGACATCAGAACTGAAAGAGAACATAATCA
>NODE_10894_length_56_cov_229.982147
ACCAGCAGAAACTTTCTGAATCTGATTGGCTGCCGGTCTCATACAGTTGACCGCGAGCAG
GGAGCAGTCGTTGGAATAAGTGTTAC
>NODE_10906_length_46_cov_39.326088
GACAGCACAGACGCCATTTTTCAATGCTTGCCATCATCGGCAGTGCTTGTCAGCCCTAAC
AACACGTATCTGGGTC
>NODE_10927_length_119_cov_99.268906
TGAAATGTTTACCTCCATTTTCTGTCTGGCGGGTCTGTTCCTTGCGGTGACGGTCACCCA
GAGTACTGACCCCGGCTACCAGATCCACGTACTGCCTCTGTGTACGTACGGGAGTGACTG
TGCCCTGATGGAATGCTGCGTACGCAATA
>NODE_10950_length_47_cov_465.829773
TGACCTGAATCTTGATGCCTCCAGGACCTTCTGTCTCCGTCGTCTCACCCAGCACCGACG
TGTCTTTGCGAGGCTCC
>NODE_10952_length_33_cov_421.393951
AGCACCGACGTGTCTTTGCGAGGCTCCTTGCCCTCTATGTTGACCACGGACGTGAAGGTG
TTG
>NODE_10956_length_66_cov_98.787880
CACGCCATCTTCTACGGTCAGGGAACAGAACCCATCGGGACACGTGACATCAACCTCGTT
ATTCCTGCAGAACTGGTCACACTTTGTACAGTTGAC
>NODE_10958_length_84_cov_269.261902
TGCAAATGGAGGTCAGTATGTCGTTGTCCTCGTCCATGGCACAACGACACGTGTAGCCGT
CCGGCAGTGACACGGTCCTACCCAAGGGGATGGTGGCCCCGTGCGTCTTGCAGT
>NODE_10970_length_73_cov_32.191780
GAACTGCAGCAACGTTGACTGCTCGGACCAGCAGTGTGCTGACGGTTACACGCCCCCAGG
GCATTGCTGCGCTGTGTGCCCTAACGGTCCCAACTGCAAGACG
>NODE_10972_length_178_cov_11.224719
GATGTGAATGTTATCACCCATCACATGCAACGTTACGCCGTATGGTTTGGTGGATCCATG
CTTGCATCCACTCCTGAATTCTACCAAGTGTGCCACACGAAGNCACCTGTACGGACGTCC
TTTGATTTAGTAAATTTTAACAATTAAATTGACCCAATGCATTGGAACGGGAACAAACAA
AACCCCACCCCACCGACCGCCACGACCA
>NODE_10973_length_75_cov_164.306671
GTAAGTTGCCTTTGATGCGTAGTAGGTTGTCCCAAAGTATTCGTATTTGTTAACAAGGTT
TAGACTTTTCTCATGAGGGACGCATTTTTCACTACCGAATATTGG
>NODE_10986_length_54_cov_111.111115
ATTTAATTCCCACTCGGCAGAGCCCAGAGCCAACGCGCCCATTGTAGCTTCCCCCGTATA
TCACCCTGTTCATTCCAAGGTAAA
>NODE_10990_length_38_cov_126.921051
AAGTTCAAGGCAACACCAACTCCATCCTCGGCTACTTCAGTGACAATGGTGGGAGTGGAA
TGGCTTTT
>NODE_11000_length_32_cov_385.125000
CAGACAACCGCTCTACCTCAACGACTGCCCTAAGGTCAACCATCACCTCCCAATCATCAT
CG
>NODE_11005_length_139_cov_116.719421
AGCCCTCCACCTTTTCGATCAGGGTCTGGACAAGAGGGTAAGCCTCCGTGTTGACCAGTC
CTCGCTTGACCAGTGACTCGAGTTGGTCGAATACAACAACGTCGGCAAGCGTCAGCGACG
AACCAACGAAGAAGCCAGTGCCATTCTCTCTGAGCAGTTTCTCAAAAAA
>NODE_11006_length_142_cov_123.577461
GTTCGGTCAGCTGCCAGTGCTTGAAGTGGACGGCAAACGCTACGCACAGAGCAGGGCCAT
CGAAGCCTACTTGGCCAGAGAACTTGGGTTGTATGGTCAGTCGAACCTTGAGTCCCTCGA
AATTGACCAGGTCGTCCAGCTATCTGCAGACTTCAGCACGGCGCTCTCAAGG
>NODE_11010_length_59_cov_114.728813
AGAGAATGATACTTCCTGCAATGCCGGTGTTCAAGCTGTTGACCTGGTTGGTCATGGGGA
TGGTGACGTAGTGCCCAAAGTGTTTGTAG
>NODE_11011_length_39_cov_13.076923
GGAATCTTGAAGTTTGCCATTGGATGAGTACACATTGGTACTTTAGCTGGTCCAGGATAT
CGACCTGAT
>NODE_11012_length_31_cov_16.387096
ATGTAATGGCGTAGACTGCATCAGTCATAGGCATGGTGTTTTAAATTCTGCTGTTGCTGA
C
>NODE_11067_length_75_cov_104.586670
CTCAAAAATTCCGTACAAACGTGAATGTAGAGGCTACATGTGTGCATACAATCACTTGAG
TGGCACAGCGGCGGAGAAGTCAGCCCAGAAAACGCTCCAGCTCTA
>NODE_11085_length_33_cov_2.727273
GGTGTATAAGTATAAATATAATAATTATTATAGTATAGTGTATCGTAGTTAAGACGCCGT
GGG
>NODE_11087_length_46_cov_8.739130
AGTGTATCGTAGTTAAGACGCCGTGGGGCCGGTATTTTGTACTTTGATTGGCCGACTTAG
ATAAGAGTTAAGGCTT
>NODE_11096_length_76_cov_1.315789
TGACAACTGTCCAAGCGATATTTCACTATCACCTAAGAATTGACTCTGGGGATGGGGGCT
TCTTCATGGGTTTTCAGACACCGGGCACGCCCCCGACACCCACCAC
>NODE_11160_length_140_cov_2.857143
TTTTTTTAATAATGTCAAGTCACTGATTTTTAAAAATAAAATATTTCACAGCTTGTACAT
GGTCGTAATCATTTAGTCTTTCTATTAGGCCTTTCGCCATTTCGCGTGACAGATTTCCTG
TTGCCATTTCCTAATTTTGCAAATCCTGAAAAGTTTTCCGTCTGTCACAC
>NODE_11161_length_38_cov_177.631577
ATTTGACGCCGAGTACGATGCCATGGGAGAGAAGATCGCCTTTGATGAAGTAGAAGACTC
TGGACCCG
>NODE_11163_length_78_cov_191.602570
TCTTCTCCTGGACCACCAACGTAGTACTCGGCTTCAAATGTGGCATTTTCTGGCACAGCG
AAGGGGAAGAATGGACCAGCATCTCCTTTCTTGCACACTTTGGTCTGA
>NODE_11216_length_519_cov_51.273602
AAAATAGGGATAACAGGGTAATAATACGAAATGAAGGTTGTTCTGTTTATCCTCCTGATT
GCAGCGAGTGCATTGTCGGCGCCTGATACCAAGCATGACTGTCTGAGAACCGCCCTCGGA
CTTTCGAGTGCCGCACTGTCGCAGGCCCGTGGGGAGTACGACATCAGAAACATGTTGACC
CACTTCACTGCATTACCAGAAGCCACCCAAGGCGCGATCAAAGCCTGCAACCTGAACATC
AAGCCTGCCATGCAAAGATGTGAGGCTGCCCACCCAGGCCAGTGCGAACAAATCACCCCA
GCCGCCATCCAAATCAAGTGCGACTCCAGATTCAGAAGAGTTGGATGCTGCCACTGCGCC
ATGCACTGCCCAAGCGACGCCTGGAAGGAAGACGAGTACCACTGCTACAAGCCAGAAACC
ACCGAATCTGTCGTTTTCCTCAACGAAGTCAGCTGCGGTGTCGACTGCGAGGAGTTGGCC
GGCAAGTGGGTCCAAAAATGCGGTGAAGGACTCAAGAGAGTCGGACTTAGACACTGTCTC
GCCATTTGT
>NODE_11217_length_237_cov_38.687763
TTCGGTGGTTTCTGGCTTGTAGCAGTGGTACTCGTCTTCCTTCCAGGCGTCGCTTGGGCA
GTGCATGGCGCAGTGGCAGCATCCAACTCTTCTGAATCTGGAGTCGCACTTGATTTGGAT
GGCGGCTGGGGTGATTTGTTCGCACTGGCCTGGGTGGGCAGCCTCACATCTTTGCATGGC
AGGCTTGATGTTCAGGTTGCAGGCTTTGATCGCGCCTTGGGTGGCTTCTGGTAATGCAGT
GAAGTGGGTCAACATGTTTCTGATGTC
>NODE_11227_length_43_cov_143.558136
AATCCGACAAAATGTGATCGAGGCCAGACCAGGTTGTCCACCTTTGACCAGTCCCCTCCC
TTGCAGACGTCCG
>NODE_11279_length_65_cov_85.061539
TAGTCAGTCTGGCCTGTACGAGACAGCAGTCAAGATGACCCCTACCGGGTGCTCGTCCAT
TTCAAACTTGTTCGGTGTGACCACGACACTTTGCT
>NODE_11281_length_31_cov_162.806458
TTCGGTGTGACCACGACACTTTGCTTCACGTCCATCAGTGGTCAGAATATGTTCTGTTCA
G
>NODE_11282_length_99_cov_28.848484
AGTGGTCAGAATATGTTCTGTTCAGGAGATGGTGGCGCCCCCACCTACTGCAGGGCGCCA
AGCAACGGGGAGTGGATTCTCGTCGGTATCCTCGCTTTTCAGACAAGATGTAATGCCAGT
CCAGATGTG
>NODE_11286_length_253_cov_77.743080
CAAGAGGAAGGATGAAAAACATGAGGCACTGTCTCAGACTGGACAGACTTGATTTAGCTT
GGGTATGGAATGACCTTCACATCTGGACTGGCATTACATCTTGTCTGAAAAGCGAGGATA
CCGACGAGAATCCACTCCCCGTTGCTTGGCGCCCTGCAGTAGGTGGGGGCGCCACCATCT
CCTGAACAGAACATATTCTGACCACTGATGGACGTGAAGCAAAGTGTCGTGGTCACACCG
AACAAGTTTGAAATGGACGAGCACCCGGTAGGGGTCATCTTGA
>NODE_11335_length_106_cov_2.575472
CAACAATGGTCCTTGCGTTCACTTGCAATGTTCCCAGAATAACTTAGTGTTCTGGTTATC
ACGTCCGCTTTGTACGGGGAAGTTCCTGGGTTCAAGCCCCAGTGAAAAAATTGTTTTTTC
TTCAATTTTTAAAAAT
>NODE_11346_length_107_cov_4.887850
GAACCCAAGAGTACTGGGATGAAGCATACAGCCAGGAGCTGCAAGCTTTTCAAGAGCTCG
GGGATGTGGGAGAAATTTGGTTTGGTGAAGAGACACAAAAGAGAATTGTCCGTTGGTTAG
AAGATCGATCAGGCTTA
>NODE_11360_length_31_cov_20.677420
CTGAAGTGGCCAGAATTATTCTCGCTGCCGTTGGCAAAGAATTCGAAGATATCCGATTCG
T
>NODE_11361_length_32_cov_37.687500
TGGCAAAGAATTCGAAGATATCCGATTCGTGAGCGCGGACTGGCCTAAGTACAAGCCACT
GA
>NODE_11381_length_211_cov_38.085308
ACGAAGCGAAGGACACGTGACTAGGACAGTGCCAGTCCTGGGACAGGACCACAAGCTGAA
AATGCTGACCAGAGTCTCGGCGGAGGTCGTTGATGATTGGAATGATTGTGTCCCCTTTGT
CAACGGCCAGGCTTCCGGCAGGAAGGAAGCAGGTCTGTACGTCTATTATGAGCATGGCTG
CGCGCATCACTGACACGGCTCCATACGGGTTACTGAGGGTTAAGGTCAGGACAAGGGTCA
C
>NODE_11386_length_31_cov_3.967742
CCATGATAGATGACAACGTCGACAAAATCTCGAATCAATGAAATGAAATAAGGACAGACT
G
>NODE_11403_length_387_cov_16.596899
ACAGCACATTCCATATCAACAACGCTCCAATGCTTTTAATGGTGTGTTGCACATTTTAGC
TCCGAGCTCACAAAACCAATTCAACACTTTCCTCAGATTTTGACTGGATCCAAGAACCTG
TACGTCGACTTCAGTTTGGTCAGTCGTGGCTAGTGCCTGGTCCTAATGAGAATGTAAACA
TTGAGATGTGCAGCACCACACCACTGGACGATGACTCTGATCCGCTGGTCTGTCCCCATG
GTTACGAGTGCAGCATTGACGACGTGGGCAGTCCAGAGACGGGTGTACCTAACCGAGGTC
ACTGTGTCAGAGTTATGGGGGATCCAGGGATGAAATCAGTTCAGTTTAGTGAGACCCAGA
ATGATGAGCCGCCACCTGACATCCACGATGACACGGAGATGGTGGACACCGCCATGC
>NODE_11409_length_164_cov_6.146341
CCCACGTCACCTTTACGGAAGAACGCCTTGAAGACCAGATTCTTATTGTCAATGTACGCC
TGCTTCATGTCATCGAACCCAGCAGACTTGGCGATGTCTTCAACCAGCTGATCATCAAGA
GTTATCTCGAGGAAGTCTGAAATCTTTCTTATCTCCCTTGGCAGGTCCTCTTTCATGTCT
TCATAACGCACCAC
>NODE_11410_length_67_cov_2.940299
GGACGGACAAGTGGAGTATGGCAACTTCTTCGACTACTACAAGGATTGGGACAACGTCAT
CAAGTCAAACCCAGACCTGTCGATTTTGGTGGTCAGT
>NODE_11412_length_117_cov_3.564103
GGAAAATGGCATTGTGCGGAATTGGGAAGACATGACACATTTGTACGACCATACATTCGG
CAAGGATAAGATGAATCTTGACACCAGAAATACACGCATACTGCTGACAGAGCCTCCCAT
GAATCCAACAAAGAACAGGGAAAAAAA
>NODE_11450_length_154_cov_29.084415
AAAACGTTGGAAAACATGCCCCACAACTTCACCTCTTCGTCGCTTTCGGGTTTTCCCAAC
TGAGAGGCCACGAAGGAAGGGAATTTTTCTTGGAAAGCACTGAAGTACNGCTGGTAGCTC
AGCTAGGTGAACCGGTGCTACGCACGCACCGACTGTTTAAGAACTAATCGGTTGTCAAGA
AGCG
>NODE_11451_length_77_cov_2.285714
GGTGTAGATATGATATGTATATACCATTTTTATACGCTTTTTATTAGGGTCAATAAGCTG
AACTTGCTAAAATTTGCTGCGCAGTAATTCTAAACTACTGTCCGGCG
>NODE_11452_length_71_cov_2.309859
TGTACTTGTTTATAAATGTCAATGAGCTTTTTAATTAGCCCTACCCAACTTACTGTGATA
AAGTTTAGAAGAAGAAAAAAAATACCATTGTGGACCCAATC
>NODE_11453_length_40_cov_47.200001
GTCTCCCCTCCTTGCATGACCTTTCCTTAGGTTTGTAATTAGTGCACTGATAATATTTGC
TACAAGACGT
>NODE_11454_length_97_cov_50.082474
TTGACCTTTGACCTCAACTGTCTTGGAATCCATATCCCCTGCTGCGTCTATCGCCATACA
TTCGTAGGCTTCACTTGTAGTACAGTCGGCAGGAATTGTGTAAGATATGCCTCTGCTTGT
CACTGTG
>NODE_11455_length_412_cov_18.237864
GGGTAATACATACCCACGCTACGCCGCTGGTAACGCGTCTTGCTTTGGTAATCAGCAAGC
CAGTGATCGAAAAGTTAATAGTGCACAAAGTGGTTGCTATTTTCATTTTCAGCCAGACCA
AAAACAACAACAAGTTTCTAAAAGGTGAACAAAATTTTGTTTGTTTAAAGGTCTAAGCGC
TCGCCTACCTGTACAATGTTTTAAGAAATGCATATTATCAATGTGGATTTAGAGGCCTAA
CCCGAGTAAAGATGAACGTCAGGAATATATGCGGCTCTTCTATTTTAATGACTGTCTTCA
TTTTGACACTAAATGATTTCTTCGTGACGCCAGCAAACGCCGCCACCACTCCTCTGATTG
GAAATTTTACAGTTAATGGCCAGACGGTAGTCACCGTGACCCAAACGACTAACCTCGAAC
TGGCATGTTCAAAACTTGACAA
>NODE_11457_length_35_cov_137.114288
AAGCTCCACGCATACCGGTCTGAAGTCTATCAGCACCAGCACACGACAACATCTTGTTAA
TCCTA
>NODE_11462_length_83_cov_154.096390
AAGAAAGCACGTGTGGATGAGTTTCCTCTTTGTGTCCACATGATCTCTGATGAGTATGAA
CAGTTGTCATCTGAGGCTCTTGAGGCTGGACGTATCTGTGCCAATAAATATTT
>NODE_11464_length_87_cov_81.965515
CAACAAATGCCCTAAGCTTAGGTTTCTGCCTGGCCGGTGTGCTTGCCAGACGCAACAACA
GATGCGAGTCTTCAGTGTCAGAATGCCTTTCATCCTCTGATCTCCTGGAGGTTAGGA
>NODE_11553_length_63_cov_2.349206
CCCAGGTATACATTTTCCAAAACAGCTTTCAGAATATTCTTCGTACAACTAACCATACTA
AAACACGTCTCCCATTTCACAGTAGTTTTTAAC
>NODE_11558_length_62_cov_249.354843
GATGGCCAAGGTGCCACCGTTGGCCTCGCATGCCTTCTTGGCGTTCGTGTGGGATTTGTG
TGGCGTTAGGACGAACTGATAACACAGACCTC
>NODE_11561_length_102_cov_26.019608
CTGCCTAGCTTCTGCAACTGTTGCCCGCAAAGTACTTCAGGTTTTGGAAGCCCTGAAGAT
GGTCGAAACTGATGCAAACGCTGGTGGCAGACGTCTTACTGCACAGGGTCGTCGTGATTT
GGACAGAATTGC
>NODE_11565_length_692_cov_19.296244
CGCAGCTATTGTGGCCATTCACTGGAATTTGATTTCAAATGGTTTAAAGTGCTGCGGTGC
TGGAGAAACTTGGCCAGAAAGACAAAATGAAAACTATACAGGATCTGAGGCATTACCACC
TGGATGGAATAGTGATGACAGTATTTATGCACTTCGTTATGTGGACCCTACAAGTAACAG
AACATATTTGATGAAAGCATTGGCAATAGATGGAGCACTCATATTGCATTTGTTGAGATG
TTTTGATGAGAAAACTGTTAGCACTACAATCAGAAGTCGAGATTTTGTGAATGAAGACAG
GTCCAATTTTACAAGTGCCTTTAACAATTTAAAGGAGCTTAATGGAACTGTTACAAAAGA
ATTGTATGCAAAAGTCATGGACTCCAACAAGCCACCAAGTACAGAGCGAAGATCTGACTC
TAGTACAACACAAAGCCAACCTGGAAGATCACCTCTGATGGAAGATCCAAGACGTGGAAA
CTCCTCTGGGGGCATTGGGTTCATCCCGCCCAGACAACCAATGAGACCAGACTTTAATGA
CCCATTTAGTGTTGGACGATCTGACCTAGATCCACTGGGTGGTGGATTTGGTGGTGGTAT
GTTCATGGATCCTCGTAGCTTTCCAACTGCAGGTGGCTTTCGACCAGGTGGTTCAATGGG
TATCCAACCTCCAGGATTTCCACCCGGTTCAATTCCTCCTGGTGCAAGGTTTGATCCAGT
TG
>NODE_11566_length_40_cov_32.599998
TGGAAAGCTACGAGGATCCATGAACATACCACCACCAAATCCACCACCCAGTGGATCTAG
GTCAGATCGT
>NODE_11588_length_31_cov_1.000000
GTAGACAGGCAACAGATGCATGCCTCTTTAGGTCAGATCTGGCCAACAAATTCAACTCGT
T
>NODE_11601_length_74_cov_108.770271
TTCAAATATCCTGCACTGATGGAAGAAGCATTGCAGGAACACCGTCGTTACAAGGCAAAC
TGTGTCTTCGTCCGTCACACGAGAGTCATAGGCAATGAAGTCAT
>NODE_11602_length_163_cov_57.914112
TGGAAATCCAAAACATTCTCTTTGAAGAAGAAGCCGACAGAACTTACGAAAGACGAAATT
TGATGTTACAGATGAAGTAAAGATGATAAAGCTAGTCGCTGGTTTGTTGGTGTCTGGATT
TCTCATCTTTCTTTACCTTAAAGGGGATGGCGTGGTGCCACCATTTCCGTTACCAGCTGA
TTTATACGAGAAA
>NODE_11604_length_174_cov_73.965515
AGCCATATCTACATCACCATTGTAAACAAGGATACGTAACTTTCTATTAATTGCTTTTTG
ATACTGTGCAGCCATTGAGGTATACAGCCTGACATAGTTGGCACCCACTGTAGTGCTGCA
TATATCCCAGACTTCAGCCTTGTCTGAAATGTGTAGGGCCTTTTTAACAGGGTCAGAGTT
GAGAGATCGGAAGAGCGGTTCAGC
>NODE_11684_length_31_cov_104.000000
CTCCTGTGTTCCAAGTGGTACCGAAGTGCGTGTTGAGACAGCTGGATGAGTTGCAACAAT
C
>NODE_11685_length_305_cov_25.852459
GTTGAGACAGCTGGATGAGTTGCAACAATCCCATACACATTTGGCAGCGTGCGGGGCGTG
GGTTGCGCCAGCAGTTGGTGTGCAAGCATCTTTCGCCTGGTCGGTGAGGCATTTCTGGTA
TTNCTTGGCAGGGTGCGGGGCGTGGACTGCGCCAGCAGTTGGTGTGCAAGCATCTCTCGC
CTGGTCGGTGAGGCATTTCTGGTATTCGTGGAGCGGTTTGCAATGCCCCTGCACAGCGAG
CTGATCGTTCACGCCGACTTCACAGAACTGACCTTCGTAGCACCGTGTCGCCGTTGTCAA
ACAACCTGCCAGATTATTCTGAGCACAGGAGCCAG
>NODE_11704_length_108_cov_74.592590
GGTGGCAGAGGTCGAGGCCGAGGACGTGGCATGTCCATAAATATAGAAGCTCTTGGTCTA
GGGAGAGGAGAAATTTTGCCCACTGTTGCTCAACCACCGCCACTTTTTCCACCTCTGATG
TTTAAACCAGTTCCATTA
>NODE_11718_length_121_cov_9.256198
AAGCCAATCTCTCACTTTGCTTAAAATTTTTGATACATCTCGAATATTTTGAGGCTTTTT
GTACGACATTTTAATAATAAATATCAAGCCTGCAGACTACAAATACTACAATGCCAAGGC
TTGACCAAGGCCGCCAAGGGTACTGTAACTT
>NODE_11742_length_60_cov_295.283325
TTTTTGACTTTGGTCGTCAACTAACTGAATGTAACCAGGTTGCTGGCGGACAAAGTATCA
CTGCAGTAGGTGCTCTGACAGCAGTAGGTG
>NODE_11808_length_32_cov_129.843750
AAATTAAAGGTGACTGGAATTATGTGTTTTGCATTGCTTGATTGGTCAGGCATCAAGTAT
TT
>NODE_11812_length_196_cov_96.688774
CAACAACTGCAATAGCTTCAATTTCAACCTTAGCTCCTTTGGGAAGTGCAGCAACTTCAT
ATGCAGCCCTTGCAGGTTTGGTTTTTGGAAAGTATTTTGCATAAACCTCATTGACAGCTG
CAAAATCGTTGATACTTTGTAGAAGTACAGTGGTCTTCACAACATTGTCATAGGTACCGC
CTGCTGCCTCGAGAATATATCCAATGTTTATTAATGCCTGATCTGC
>NODE_11830_length_55_cov_5.272727
GTCCCTCTACTGGTCCCACCATTGGTCCAACTACTGGCCCCACTATTGGTCCCGCTATTG
GTCCCACTACTGGTCCCTCTATTGG
>NODE_11831_length_34_cov_4.147059
TATTGGTCCCACTACTGGTCCCTCTATTGGCCCCACTACTTGTCCCACTACTGGCCCCAC
TATT
>NODE_11835_length_93_cov_4.301075
TGTTGGATAAAAATGATGAACAGTTTTATGGCCAACCAGGTTACTCAATTCTTGTATAGC
ACTTTATTTCATTCATATTCAGCAATATCTCGCAAGATATTAAATAATGTTGTTTTTTTT
TTT
>NODE_11837_length_48_cov_224.062500
TCGTCCAAGGTTGACTTTAACGACTGCAAGATTATTAGCTGGGGAGAACATAATACAAAG
TTGACTCAAGGTGGGGAG
>NODE_11873_length_47_cov_84.574471
TTTAACGAGTTTATTCCTCGATCAACCAATCGCCGACGAGTTTACTCAAACATTCTTACA
TACACAATATGCACATT
>NODE_11874_length_70_cov_110.014282
AAACATTCTTACATACACAATATGCACATTTGGTCAGGATGTCAACCTGGATGAGGGCCC
CCTCACAGTTGGCCGGGCACACCACCACCGGACATGCGAA
>NODE_11888_length_40_cov_120.650002
ACTACGGATAACGCGCAGATAGCCGCGTATGCTATAGATGAGTGGGCGTCTGAAGTTAAG
AATGTGAATC
>NODE_11891_length_43_cov_49.255814
ACAGCTCGTCTTCTTCAGAGTAAGCGACACATTTTTGTAGCATGGCTTTTTACTAGTATG
GAATCTGATTTAC
>NODE_11927_length_44_cov_1.272727
GAGATATTCAACGATGAGGTAAGTAAGTGGACCTGGACTGCTTTGAGATATTCAACGATG
AGGTAAGTAAGTGG
>NODE_11928_length_95_cov_46.063156
TTGAGGTCACACAAGTTTGCGGGCAGTCCAACGACCTGGTGGTTCTCGGGAGAAGTGCAC
AAACTGCTGTAGTGTGCTGCTTTGCTGTTCAAATCTTCAACGGCAAAAGTTGACAGAGCG
AAAAT
>NODE_11935_length_97_cov_1.649485
CGCGAGTCCTGCAGCCATCTGCTCACCTTGTGGCCTCTTAGTTTGACAATCACATCGCCT
GACCATCTCGACTCGTAGTCACTCCAACTCCTGGCCACCTCAACATGAATGGCAACAAAA
CCGATTC
>NODE_11943_length_321_cov_24.532711
CACATCCATTTTTTTGACATGATAACATGTAACATTTAAAACGATCAATTAAACATACAA
AAATGTTTGAACAACAAAAATAGAGATAAAAAAGGCTTAATTATTAATTGTTTTTATTTT
CCGGTTAACTTAATGTTCAACAGATTGAGACGAACTCTAGCCCTTGTAAGCAANNNNNNN
NNNNNNNNNNNNNNNNNNNNNNNNNNNNNNNNNNNNNNNNNNNNNNACCATCAACGGCAT
CGGCTGCCGGTTCTGTGGTACCAGGTCAGCACAGACCGACGTCTTGTTTGACACCATGTG
TGGTGGCGACATGTCGACCTTCGATTCAAACGACCGTAGCTACCGGTGTCT
>NODE_12007_length_77_cov_13.064935
TTTTTTGACAGTATCCATAATGTCTGTAACACTCGCCTTGCCAGTTCTGCTTACGTGTAA
ACAGGGTTGGATGACACATCCCTGTGTTGACCAGGTAGCTGACCATG
>NODE_12084_length_198_cov_55.070705
GCAAGCTCAATCCGGACTTATCCCCAACATCGTAGGGCGATGTGACAACGACCCGAACAT
GTCGCTAGGGACTTTCGTCAGCAGCAAGCTGCATGAGTGCGACTCTCCTGTGACACTGTT
CAACACGAGCTCCGGCGTCCCATTCGGTTAAAGGAACCAGCTGGACGTCCCAGTGGACAT
CTAAATTAATGACCCTTGACGGACCTTCCTACTCAAATGATGATGACG
>NODE_12133_length_48_cov_103.333336
GCCACGACGAAGACCTGGTCATCCTTGGCCAGCCTCAAGATGACAGAGTTGCCAGCGGCG
GAGTACTCGTTGTCAATG
>NODE_12134_length_57_cov_27.192982
CATCTTATGTCCGTGAATTAAGTCCAAACATCTTCAGCTATCGTAAATCAAGGTTCTCTA
AGAACGTTGATGTATCAGAAACATTTG
>NODE_12179_length_897_cov_21.013378
AACCTGCTGGACATCAATACCACGGGCCAGCAAATCAGTGGTAATGAGTACACGACTCGA
GCCAGAGCGAAACTCTCTCATGATTAAGTCTCTTTCATTTTGGTTCATGTCTCCATGCAT
GGCTGAGACGGTAAAATCCCTTGAGCTCATCTTTTCGGTCAGCCAGTCGACCTTCCTGCG
TGTGTTGCAGAAGCTACAAACTAAAGTAATTGTAAGGGTCTCATACAAATCACAAAGTGT
GTCCAATTTCCACTCCTCTCTCTCTACTTGAACGTAGAATTGACGAATACCCTCAAGGGT
AAGCTCCTCTTTCTTGACAAGGATCCGTACAGGATCTCTCATAAAGCGCTGGGTTACCTC
CAACACATCACTCGGCATGGTGGCAGACAACAATATCACCTGGATCTCAGTAGGCATAAA
CCTAAAGACATCATAGATTTGATCTTTGAAACCCCTGGACAACATTTCATCAGCTTCATC
CAAAACAAACATTTTAATGTCCTTAGTATTAAGAGCTCTGCGGTTGATCATATCATACAC
CCTGCCAGGTGTGCCAACAACAACATGAGCCCCACTCTCCAATTTTCTCATGTCTTCACG
CACCAATGTACCACCAATGCAGGCATGACACTGGGCACCAAGATAATCACCAAGAGCCAA
GACAACTTTCTGAATCTGCTGAGCCAGCTCCCTTGTTGGAGCTAGCACAAGTGCTTGTGT
GTTACTGTTATTCAGATCAAGTTTCTCCAAAATAGCTATGGAAAAAGTAGCTGTTTTTCC
TGTGCCAGACTGGGCCTGGGCAATCACATCTCGACCACCAATGCATGGCAAAATTGCCCT
CTGCTGAATAGCAGATGGCTTTTCAAAGCCATAAGCATAAATGCCTCTGAGCAAATCTTC
CCTGAGGGACATGTCATCAAAAGCATC
>NODE_12232_length_161_cov_1.633540
CGTCTATGTTCTTTGTGAATGAGTAGTAAGTTAAAAGAGACCCGTCTTTAGATATTGTTA
CATATGGGTCTTGGGTCGCGGGTTGATAACGAAAATCTTGTTTCAGCTTGTACCAAGCAT
AAAAGTCTGACTTTTTTGGAGACATCCTCCCACACCATAAGTCGACCGAGTGGTTAAAGG
TGTAATACGTT
>NODE_12237_length_101_cov_45.811882
GTCGTCACTGGGTCCGTACTTGACGCATTTGTAGACCGTGATGGCCGCGAAGATGATGGT
CAACCCCACCATGATGGCCACAATGATGCCGGCCTGTGCTCCAGTGGACAGGAAGTTGAC
GTACTCTGTGG
>NODE_12242_length_31_cov_24.516129
CCACCACCACGCCTACCCCGACCACGCCTATCACGACCACAACAGCGGCGCCAACCACCC
G
>NODE_12258_length_64_cov_171.484375
AAGTACAAACTCGAGGGCGACTCGTGTAGCGTGTTTGAGCGGATGAACGGCCACTGCAGC
TGTGAGCCAGGCACCACGTGCCACACCTACGAGG
>NODE_12259_length_122_cov_4.934426
CAGCTTTGACTTTTGCATCGCCTTTTTTTTGAATCATGCCGATTGTTGAGGATTTGTTGA
ACCCGTCGCAGGCCCGCGAGGCACGCCGACACAAGCTCAAGCGTTTGGTCCAGAGCCCGA
ACAGCTACTTTATGGATGTGAAATGCCCTGGC
>NODE_12262_length_31_cov_1.000000
CGACCGACTCACAGACACACACACCCAAATCAACATGTCTAGCTGTTGGTTAGTTAGTCT
G
>NODE_12322_length_99_cov_3.424242
GCGCATTTGCAACTTGAGGTGCAAAATTTATTGACTGAAGAAAATGAGAATACGAGAGAG
AAATGTCTGGATTGTTTTTATCGTCGTCGACCAGCCCATGCATTAAAACGTCGTTTACCA
ACGACACTT
>NODE_12323_length_168_cov_4.517857
CACGACAACAATGATGAATACAATGATCATGTTCACCGGAATTTTCACATGTCTTTTATT
GATGTTGAACATTGCCCAAACCTATTCCTTGAATGAAAAGACGAACGATGATGAACATTC
AATTCTTCTCGATCGACCATGGGCATTTGCATCGAATAGATACTATCCTCTCTATCAAGA
TCAAAGCATTTTGACCGA
>NODE_12349_length_188_cov_65.074471
GCTAGTTCATATTAATTCTCCTGAAGCAAGCTTGCTTGTGACAAGTGATGGCTTTCTTGC
TTGGATATTCTCAGGGGTGGGAATAGTTTCTCCAACAGCTTCTGCCTTGATAATTTTCTC
AGGTGGTGGTGGAGGTTTTGATTTGGCACTCAGCTTAGCTTTGGCCATGGCATAATCCCC
AGAATCAAAGTACTTTTGCCCTCCCTTTTGAAGTCTTT
>NODE_12365_length_31_cov_1.064516
CCTGGCTTAGATACGATTAGCCTGTCATGGTGATTGTTAGCCTGGCATCACCATCGTCAT
C
>NODE_12382_length_109_cov_1.522936
GTTTCAAATAAATCAGCGCTTTACTTTTAGTAATTCATGGACTAAAAATGTCTATATCCC
TGAAATTTGTTTTTGTTCCTGTGATCTAAAGGAAGAGCGCGGACGACGAAAAACCGAACG
CTGAAGATGGACGGAGACT
>NODE_12383_length_314_cov_19.910828
GATGCACACATTTGTCAGCCACTAGAGTAGCAATGTCACGAAACATTTCATCCAGTTGGG
CGGCCCTCTCTTTTTCTGACACCTGCAGCTCTCCTTTACTAAGAATCAACTTGCAGATTT
CTGTTTCATCGTCTATGTCAAATACTTTTTTCAAGTCTGCCATCTTGGCAAACTCTCCTT
TAGAAACATTGGTGAATACTTTTTGCGTTTGTAAAACTTCATCTATGTCTGTCTCANACA
GAGTTAAAATGAAGAGGTAACTCTGTGAAATAATCCTATTGTCCGTTAAAGTTTCGCAAA
AGGTGGAAAAAAGTCAGCTTGTTAACGATGTAAACAATTAGCAA
>NODE_12391_length_54_cov_78.296295
ATGTAAAGACAACTGATGGATACTTACTCCGTGTATTTGTTATTGGCTTCACAAAGAAGA
GGAACAACCAAGTCAAGAAGACAT
>NODE_12418_length_31_cov_1.000000
GACCATAATTTGCACCGACATCAGATACCACGAGGACTGTGTTGGCTTTAGCTTTCATGT
T
>NODE_12426_length_31_cov_62.838711
ATGGATTACTCAATCCCAGTCCTACTTATTTGGGGATGCAAGGACGCTGCGTTATGCAAA
G
>NODE_12430_length_205_cov_10.643903
TTGAGTTCCATTCGACAGCAAGGAAGCTACAACGAATATAAAATTTCAGTGAACTTTAAA
AATGTTTGAATAACTGAATTGTGTATCAGTTTAAGAGGGTAGTTACATGGTTTTAAAAAA
TGGATATATTCACACCAGCTGTTTGAAAATTGCTTTAAAAAATAATTTAATGTCATTTAC
GCATGAGCTGAATCAAAGTGTAAAGACTGAATAATGGTCGACCATTCTCCATTGC
>NODE_12435_length_75_cov_1.013333
GATTACTGAATAATTTTTTTTAAAAAGAAAGCTGAAAAATAATCGCATTACGTCAATAAA
TGTCTTTGGTGACTGCAGAATTCAGATCGGAAGAGCGGTTCAGCA
>NODE_12496_length_47_cov_8.914893
AAAATAGGGATAACAGGGTAATACATTCATGAAGATTTGTGCTTTCAAAGTTATTCTTCG
TTGAAATAATTGTTATT
>NODE_12498_length_51_cov_102.607841
TCTGGGTCCTAATCTGATAGGTCCTAAAACTGCAGCAGATATGCACATGGGCAATCTTGT
TTGTATTGCCTCAAACCATTT
>NODE_12500_length_75_cov_71.866669
TATTGGAAATTCCTTTCTGTCAACGGATTTTCACCAGATGCTCGTCGACCTGTTAACTTT
GTCGATGACCCAGAACTTATGTATGTTATGCTGAGATATAGGCAG
>NODE_12535_length_31_cov_6.935484
TTCACGATTTTATTCCTCTCCGCACTTTGCGGCTGGGTATCTGTGTACTCAATAAGCAAT
C
>NODE_12536_length_34_cov_7.852941
GCTGGGTATCTGTGTACTCAATAAGCAATCAACAAAATGATGGCCAAGGCGAACTCGCTA
ACAG
>NODE_12553_length_90_cov_95.599998
ACATGCATGGCCTGATCCACATTGGATAAGTCAATGTGAACGTACTTATGAAGAATGTTG
GCTATTTCGAGATGCATCAAATGTCACAACGACATGTCAATGGCATTGTGATAACCATAA
>NODE_12575_length_130_cov_21.761538
ACATTAGCAGCATTAACAAATGCTTGACTGTAATCCACTCCTATAACCTGCTCAACACCT
CTTGTAAACTCAAATGATAATATACCAAAAGCACACCCAATGTCCAGTGCTCTGTTAGGT
ATTCCTTCCTTAGGCTGATAATACTTCAAGCATAAGTCTG
>NODE_12576_length_40_cov_45.450001
TAGGCTGATAATACTTCAAGCATAAGTCTGCACATCTTTTCGGAAAGTCAAGCGAATCTT
TAGGTCCGAA
>NODE_12588_length_159_cov_52.459118
AAAACCATCAGCAATCCACTTCCTCAAACCCCCATTCAGGACGGACACTTTATCATGGCC
AAACAGCCTGAAGAGAAACCATGTCCTGAAAGAGGGTCTAGAGTTGAATCTATCGTAGGC
TATCACATGTGTTTCATTGGAGATTCCGAGGCTTTCCACGTAATCCTCAAAGAAGTTTGG
GTCTGGAAT
>NODE_12589_length_41_cov_90.048782
GTAATCCTCAAAGAAGTTTGGGTCTGGAATCTGAAATTTGATTGTGGATCCTTGTTTAGG
TGGGCTGACTT
>NODE_12594_length_31_cov_106.096771
GTAGGCACACAATGGCTTAGGGAACAAATTCTTTGCACAGCTCGGGGATCATCAAAACTC
A
>NODE_12597_length_31_cov_142.225800
GGGATCATCAAAACTCACAAACACCTTTAGGGTTCTAGACACATCTTGGTCTCCCGAAAC
C
>NODE_12630_length_661_cov_18.508320
TGGTGCTTGAGTTGGTGCTTGAGTTGGTGCAGATGTTGGAGCGGGTGTCACAGAGATGAC
ATTCGTCCCCGTACCGGTGCCGATAATGTTTCCCATGTAGGCCCCGAAGTGTGCACTCAG
ACAAGATGTACTTTCACAGAAACCTAGTACACAGCTAGACACCGTACCAAGGGCATTCAC
ACAAGGATCCCTGGCACGGTCATCAAGGCATTTCTGGTGTTCATGGTTGTTCAAACATTG
GCCTTGCACAACGTACAGCTCATTGACATTTACTCGGCAGAACTGACCTGTGTGACAGTA
AGTGCCTGTTTTCACACACGTTGCTAAATCAATCTCAGAGCACTGTCCGGGACAAAACAG
TCCTGGGTCTGCGACATGCGTGCCGAATGTCTGCTGTAGCACCAGCGATATGTCTCTGAC
ACAATCGTTTGTCTTACAGCACAGTTCACATCTTTCGTGTGGGATCTCTACTCCTCCCCC
TGCACAGACGCCCAACGGATGAGCTATCGCCCTGGTACAATCCCCTTCTTTCATGCACTT
CACAATGGGCTGTCCGTTACCGTACGTCACTGAGCACACCTCGCCAGGGTGACATGTTAT
AGGGGCACCGAGGCACGCCGGGAAGAGATGACCACGCCCGTCGCAGTTATAGCAGGTTAA
ACTTGTGTCCACTGTGCCTAGAACTCCAACG
>NODE_12669_length_129_cov_127.131783
ATAGACTGCTTTAATCAAGACCAATCATAGTCAATTATCCTACAGTGAAAAGGCTCAAGT
GGTTCTAGCTGAGACGCTGTCTTGCCAAAACACTAGGTGTAAGATTCTCATCTTACATAG
CTGCATTGATGGCATCAACTATTTTCTTCAGCTTCTCTT
>NODE_12670_length_37_cov_211.486481
CCTTTCGTGAGGAGTTGCTTGATACCTTCAAACCAGGAACTATAGAAGTGACTGGTGAAG
GGACTCC
>NODE_12696_length_93_cov_82.193550
TTAGAGAGCTATGGCGATGCCCCCGTTCCCGCCGCAAGCCCCGTTGCCGGCCTGTGTTAT
CTGACTATCAGCGGGTCGGTCACAGTTGGCAAGGGACAGGAAGCAGGAGTTGCTGTAGGT
CTT
>NODE_12718_length_88_cov_2.363636
GGCTTTGCAATTTCCGAAGACGCCTTTCACTCTCTTATCACAGATGATAGAAAAAGAGGA
AGACAAGGAATGGAGAGACAGGAAACAGGAAGATTAAAGATCGGAAGAGCGTCGTGTA
>NODE_12749_length_40_cov_36.700001
GATAAGGACTCCATAGATTGTACAAGTAGTCGTCAAAATGGAACATTTCAAACAACAATA
ACCAAACGCT
>NODE_12758_length_35_cov_156.657150
TCCCTCTCCTCGTCAGACTGCTTCTTAAAGAACTTGTGGAAACCTGGAAGAGCCACGTCA
TCTCT
>NODE_12760_length_72_cov_70.513885
CCACGTCATCTCTGTCAAAATGAAAAGCCATTGAAGAATAAACATAACTGGCGTAAAGTT
CCAAGTTGATTTGTCTGTTTATCGCAGCTTCGCATTCTTCAG
>NODE_12784_length_91_cov_29.318682
GCCACCAAAACTCATCAACTGATCAGGAATGACTTGCACAAGCACATAAGATTCTGGCTT
TTTGAGCTCATCTGCAATCAATTTCGTAGCTTCCCGAAGGAAATTTTCTGGAATTTGATC
T
>NODE_12799_length_61_cov_187.770493
GACTTATTAAAGTTGATGGCAAGATCCGCACTGACAATTGCTATCCCACTGGATTTATGG
ATGTGGTGACTATTGATCGCACTAATGAGAA
>NODE_12801_length_40_cov_257.549988
CATCGTTTGTTGTAATGTATGGCACATTCTTTGGACCTGTTGCAGCTTTGCGGACACGGC
AAAGTTTGTA
>NODE_12857_length_36_cov_63.305557
TGACCAGCTGAGACTGAACGTTCTCTTGTTCCCGCTTCCTTACCACCAAAACGCCTTCTA
CGCATC
>NODE_12858_length_68_cov_101.911766
TCCTTACCACCAAAACGCCTTCTACGCATCAAGGGCGGCTTACGTGATCCACAAGTTATC
CAATGGCACCAAGACATTTGACTGGATAGAGAGGATCC
>NODE_12859_length_139_cov_86.050362
CGCCTTGGACACAGCAAAGGACATCACATTATTTGCGCCATCTGAAGCAGCCGTGTCCAG
CTTGCCTGCGTCCTTGGTCCAGGCCCTAACATCGAACAAAACTTTACTCCAAGAGGTTCT
TAAGTTCCACGTGGTTCCCAGCCTTGCACCTGCCAGTAGCATCAAGAAT
>NODE_12872_length_102_cov_38.568626
CAAATTCTATGGCTGGTGTTGTCAAATCAATGGAGGCTGCAATGAAATCCATGAATCTTG
AAAAAATATCACAGCTGATGGACAGATTTGAGCAACAATTTGAGAACCTTGATGTTCAGT
CCCAGGTCATGG
>NODE_12910_length_97_cov_4.340206
AAGTATACGCCAGGTTTTTTTAAACTCATGTCTGAGACGAGAGATGGCGTCACCCTGATC
AGGGTGGGCACAAAGGTCCACAAACCCACCAGCAGACAGTCGTCCAATGTGGACAGCGTG
GAAGTCC
>NODE_12912_length_43_cov_140.720932
TTTCATTTGCTATCACTTCAATCAGGGGTGTGGGTAGGAGATTTGCTACAGTTGTTTGCA
AGAAAGCCAATGT
>NODE_13069_length_69_cov_5.159420
GTATACTGTCAACAACAAAAACAACAACAACAAAAACTGTAAAACAGAAAGAGTACGAAC
TGAAACGAGGTGAAATCTTATTTTACTATGTTAATGTTT
>NODE_13078_length_73_cov_4.273973
ATTCCACAAAGGATAAGTAAATACAAGAAAACATTATGTAATTGTACCTTATGTTGCAGT
CCAAAATGCTGAGCGATTAAAAAAACAAGATGTTACATTTGTA
>NODE_13079_length_107_cov_2.271028
CGATTAAAAAAACAAGATGTTACATTTGTATGTTATGAAATTGAACCAGACACATTCAAC
AATATTGTACATTTTAGACACATCATCTCATTTATTTTGTATTCATGATAAATGTTTAGT
GAACAAACTTAATCTCT
>NODE_13080_length_334_cov_73.230537
ATAATAAATCCTTGAATGAAGCTCCTGTTGGCCATCTGCTTGCTCGCTCTGGTTGCCGGA
TCAAACTGCCAGGCTGCCTACACTTTGGAGAACTGTCTGTATGCCTACGGATTGGTTATC
GCTGATTTGGCTTTCGTGAAGAAGGATCTGAGAAATGCCCAATACATCTCCAAAGCCAAG
TCCGATGTTGCCACCCTCAAGAGTGTCTGCGTTGCCGTCATCAACAGTCTGCCAAAGGTC
AGCGAGGAGCCTGAGAACCTCACTGCCGGTTGCGACACCTTCCTCCAGCAATACAAGATC
GCTGTCAAGACCACCCCAGCCAAGGCACTCCCTCTGCTCCAAGATCGGAAGAGCGTCGTG
TAGG
>NODE_13087_length_67_cov_1.164179
GTTATCCCATCTGAATGATCACTAATTAAGGGATTAATATAGCCAAGAATTTTTTTTTTA
AATCATGGTTCTTGATGAATCAAAAACAATTCTAATT
>NODE_13089_length_34_cov_88.235291
TTACCACAAAGAATCCATCCTTAGTTATTCGTCCCTGTTCCTGCTCAAAAAGCTTTGGTT
TAAT
>NODE_13114_length_506_cov_26.622530
GCCGTTCTGGTTCTGCTGCGGACACTCAGGCAATAGCTGACATAGTCAAGTACCACATAG
AGTTTCACAGAATGGAGACAGGTGAGGAGCCCTTAGTAAACACAGTAGCCAACATATTCA
AACAGCTTTGTTATGACAATAGAGATCAACTCTCGGCTGGCATCATTGTAGCAGGTTGGG
ATAAACGAAATGGAGGACAGGTCTACTCCATTCCTATTAGTGGGATGTTACATCGGATGC
CATTCTCTATTGGTGGATCTGGCAGTACTTACCTGTATGGATATGTGGATGCTCAGTATA
AGCCCAAGCAGAAGAAAGAAGATGCTTTGAAATTTGTTGCCAATTCCGTGTCCCTTGCTA
TCNTTTAAAATACTCCTTTTAATTAGTAATAGTGTAATAATAATGTGTGCAAAGTCAAGT
ATATAAAGTAACAGTACCTCGTTACACGACAATTGTAAAGTATTAACAAAGAAAAGACCA
AGTAAACAGACATGTCTCACTATTAGAAATTTCGACTTTCAACAGTATTTAATAAA
>NODE_13117_length_32_cov_68.468750
CAACCTGCTACAATGATGCCAGCCGAGAGTTGATCTCTATTGTCATAACAAAGCTGTTTG
AA
>NODE_13118_length_86_cov_58.441860
GCCTTGGAAGCCACATCGATGACAAGCATGTTGTGCAGGACGCTTGAATACGGTCTCCAG
TCCACTCCCGTCACATTCCTCGTGGGCTCGCCGTACTTGGCGAAGTTGGTCCACAT
>NODE_13119_length_31_cov_40.129032
CTCGCCGTACTTGGCGAAGTTGGTCCACATCGTCTGCACCAGATTCCCCACGTCTTTCTG
C
>NODE_13127_length_34_cov_86.323532
GAGACCCACAATGACCCCCCAGTGTTCTGCTCCTCTTGCACTGACGCTGAATGCACAGCG
ACCA
>NODE_13152_length_37_cov_203.162155
CCCCCTTTGCACATGGCACAGACTAGCATAATCATGTGTTTTGGTGTGATAGCACATAAT
TTTTGTG
>NODE_13153_length_47_cov_223.361710
TCTGGCATAACGCCGGGTTATGTATGCAGTCTCCGTAGTTATATCCCCAATCACGACACA
AGCGTGGACAATCCCAG
>NODE_13184_length_198_cov_9.398990
GCCTGCTGTGTATATACTGACATCAACTTTAGGCTTTCGTTTGTCCTCCTGTTTCAGTTC
ATCAAATGAGTGCAAAGATAAAAGGGAACCTTCTGCAGCAGCTTCAGGATCACCACATGG
ATCAATTTCAATTTTCGTCTCGCCAGCTTCTCGCAAACTAACCACAGCATTAGCAACTGC
AGTTCGAACATTTTCCTTTCCTTGATCCAGCTGTTCTTGTGGATCATA
>NODE_13185_length_313_cov_6.242812
AAAAGACGGACAGTTCATTCTGACCCCAGCAGCCCAAACCTTCAATGAGGCCACTGGTGG
AAAGCTGGAGAGTACTTTAAAAATAGCTGGCAAAAAGTTAAAGTGTGGTAAAAGCAGAAT
ACTCTATGGTCTTGATGAGTTATACTCATCAATAGCTGTTGCAAATTTGGGCAAGCAAGA
TGCTGGTTATGATCCACAAGAACAGCTGGATCAAGGAAAGGAAAATGTTCGAACTGCAGT
TGCTAATGCTGTGGTTAGTTTGCGAGAAGCTGGCGAGACGAAAATTGAAATTGATCCATG
TGGTGATCCTGAAGCTGCTGCAGAAGGTTCCCTTTTATCTTTG
>NODE_13186_length_219_cov_10.351598
CATCACTACTGTGTGGAGACAGAGGTTCAGTGTCACTACTGATGCCAGAGTCACTTAGGG
CTGTGGATTCAGGGGAAGACACTGATGAATCTTTTATACTTAAATAATGTTCATAAATCT
CATCANCTTAGAAAATATGAATTTATTACAAGTATTTAGAGTAGTTTATTGAAACGACCC
AAATTCAGTGAAAGACAAAGACAGTCTACACATAGACCAAAACACAAAACACTCTCTGAT
TTTTTACTC
>NODE_13337_length_148_cov_79.594597
CAGATTGACCAAGTGCTCGAACTCATCCTGGACTACTGGCGGAAGTACGTGGAGGCTTTC
TACCACCAGGATGCTGCTACTAAGCTCACTCTGATGTCCCGTCTGGAACAAATCCACACT
CCCGCCATGTTGACGTCACTAGAGAGACTATTAGAGGAAAACGGCACGGGATTTTTTA
>NODE_13339_length_239_cov_73.334724
TTTTGGAATGGACATGCTTTCTTGGTAAATTGAAATCCAATAACATTTCCTGTTCTCCGG
CAAGTTTTAATGACACATTTGTTGAGGTGAACAGACGTCCCTATAGGATAACACGTGTTG
TTGCTGAGACATCTGTGATCTGTTCCCAGACGTTCGAGGCCATTATGACAATAAATATTA
TAGCAGAGATTGTTTGTCTTTTGAAAGTAGCTATTCCCGTTGTCATTGGGTGAGCAGGTA
CCTAGAATCGGCCCGCCATCAATGAGCAG
>NODE_13340_length_38_cov_16.368422
AATCTCTGCTATAATATTTATTGTCATAATGGCCTCGAACGTCTGGGAACAGATCACAGA
TGTCTCAG
>NODE_13341_length_182_cov_3.554945
CATGTTGACAGTCACTTTTTCGCTAACTTTGTCACTGGGGCTGTACGTGTAAAACTGTGA
CTTGTTAAACGTCATCATCATGTTGGTTAGGGCTGGACTTTGTGTGTTACCAATGTATAT
AAAACTGAACTCATCTATGCATGAGTCTTTGGGAAGTTCTATACTTCTACCACATTTTCT
CACTGTAGTAAAGGGTTTAGCCACTGGTGCGT
>NODE_13355_length_52_cov_13.461538
GTGGAAGTTTTATGACAGACAATTAGCCAGGACAACCACATTACCCCAACAGGTGGAAGT
TTTATGACAGACAATTAGCCAG
>NODE_13356_length_158_cov_8.012658
TGACCATGTTGACCAGAAGGGGAAGTAAAGTTCATTTTGTCGCCTGGCGTTTGCAGTGAC
TATGGCCAGGGCCGTGTCAATGGGGGATGCCGGACTTACAGTGGCCAGAGTTTTATCAAA
TGTGCAGCTCTTCAGCTGCTCAATGGCATTTTCAGTTCCTATAAAGCCTAAAGTGCAAAT
AGTAACAG
>NODE_13357_length_327_cov_8.535169
GTTTATTTAGCCTCTTACTCTCTACCTCACATTGTCGCTAACCATGGAAGTATTGTAGTG
GTCAATAGTTTACTAGGAAGAATTCCCCACTCATTTCTAGGAATCTATGTTTCCACCAAA
CATGCGCTCCGTGGTTTCTTTGAGTCTCTGAGGAACCAATTCAATACCTTGAAACAAGAT
GTCGCTGTTACTATTTGCACTTTAGGCTTTATAGGAACTGAAAATGCCATTGAGCAGCTG
AAGAGCTGCACATTTGATAAAACTCTGGCCACTGTAAGTCCGGCATCCCCCATTGACACG
GCCCTGGCCATAGTCACTGCAAACGCCAGGCGACAAAATGAACTTTACTTCCCCTTC
>NODE_13358_length_31_cov_22.387096
TTACTAGGAAGAATTCCCCACTCATTTCTAGGAATCTATGTTTCCACCAAACATGCGCTC
C
>NODE_13360_length_35_cov_161.800003
GATACCAGATGAAACAACAACATATTCCGCTTGATTATTCCGATTCTCCAAGCCAAGGGC
CGCAG
>NODE_13371_length_88_cov_2.420455
AGGGATAACAGGGTAATCAGTGACCTTGACCATCTATGATGCCAACACATATGGAACAAC
AACATACAAACTCATCATCAGTAGTGAGGCTGGCTCTGTGGAAATGAAATTAGAAGTT
>NODE_13436_length_31_cov_2.451613
TGCACAGACAATGTTGATAATCCTGGACTTTCCGACTTTTCTTTTCCATCTTGAAAAATT
C
>NODE_13445_length_72_cov_93.263885
ATTAAATACTCTTGTACGAAAACTGTCAGTGGCACTACTAGCACATACTCCGTCAGCTCT
GTTGGCGCTCGCTGCAAGGACAGAAATGGCGTCTGTTATAAT
>NODE_13446_length_70_cov_1.385714
CGGCAATTGATCTTGCAAGGCTGGCAAGAGCAGGTGTTCGTCAATCCGGCCAACGTTGTT
TTCGTCTACCTGCTCGTACGTGACACGCTCACCTACGTGA
>NODE_13453_length_45_cov_86.599998
AAATTGGGGTTGATTGACTGCTGTAACATACCATCTGTTTACATTTTGATAAGGCTTGCG
AAATTCAGGATCAAG
>NODE_13454_length_67_cov_1.462687
TCAGATAGTGATTCATCAAGTTCAGAAGATAAAAAGAAACCTGCAGCTAAAACTACAACA
GCTGTTAAGACACCAGTTCCTGCAGCAAAGGTTACCA
>NODE_13457_length_41_cov_164.512192
TCTGTTATATTGCATGCGGCGCTTGGCACGGCCAGTCTTTCCTTTCTTCTTTTCTTGTTT
GTCAACTTTTG
>NODE_13478_length_88_cov_2.420455
CGTAATCTAGGCTTACAAATGTCAGCTGGATGGGTACATTTCATGCTGCATAATCCAGAA
CCACATGTTTTGCTCTTTCGTCGTGCATTGAAATCGACATGAATGGGATAAACTTCGT
>NODE_13483_length_134_cov_49.925373
TCATGTTAGAAACAAGACTTGTTGAGTTAGGTGCCACGTTTGGCCAGGCAGATAACTGGC
AAGAGAATGTTGTGGTTGATGGCAGGCTTATCACTGGACAAAACCCTGCTTCATCGTCTT
CCCTTGGCAAAGCTATTGTGGCACAACTCAAATGATTCAGTACC
>NODE_13500_length_39_cov_129.743591
AAAAAAGTTGATTTCTGCGCCCGCTCCAAGGAAGGAATCTCTTGTTTTGATGGCGTTAGA
AAAGATCCA
>NODE_13534_length_119_cov_158.201675
GTCAAACTTCCTGGACGTCGTCCGTGGGAAGGAGTTACTGTAACAATGCTAACATTCACT
TCAGCGACACTGTGTGCTCTGATCGCAGCCCTAGCGGGTGCTCAAACTCTGAACGACTGC
CCCGCAAAATTGCCTCGAGACAGTTTTTT
>NODE_13538_length_40_cov_9.425000
TTCACACAGCTCAGTCAATTTGGTCAATCGCTCACACAGCTCAGTCAAGTTGGTCAATCG
CTCACACAGC
>NODE_13540_length_32_cov_4.437500
CAGTCAAGTTGGTCAATCGCTCACACAGCTAGGTCAATCAGGTTAATCGTTCACACAGCT
CA
>NODE_13549_length_62_cov_9.403226
TTGCTGACAGAGTCAAGAGGTCAACAACAGCGCCACCAAGCGGAGTGCAAGAAACCGACA
GTCTATAAAGTCTATGCCAATAATCATTAAAT
>NODE_13614_length_41_cov_4.634146
ATTCCAACATTTACACGAATAACGATTGGTATGACCTACTAAGTTCTCTAGCTCTGTGCA
CCAAGGCTCAT
>NODE_13615_length_276_cov_6.086957
CTAAATGCATATGGGGATCCATATTGGATATCATATTGTGAACTTAATCATCAAGAGTGC
TGGCTCCAACGAGCAACAGATAATACGACATACACATGTCCATGGTTATGTGATAACAGA
AACTTTGTACATGGAGATTGCTTCATCAATGAGGCTTGGTGCACAGAGCTAGAAAACTGG
GTAGGACATACCAATCGTTATTCGTGTAAATGTTGGAATTGGTTAGGCCCACACACGTCG
TTCGATCCAGATATTGTTTACTAATAATTGGCAATGATTATAAGAGATCGGAAGAGCGTC
GTGTAG
>NODE_13620_length_31_cov_121.806450
ACGCCCCCAATGTTCATCAAGATGCCGATGCCAAGAGTGACCACGCCCACCTTGTAGCTG
G
>NODE_13657_length_279_cov_10.275986
TAATAATAAAACCTTATGAAGATCTCAGCTGTGTTCGGACTTCTGTGCATCGTGCTGTTG
TTGGCAGCCCACGTAGAGGCGAAGCCTGCCCCAAAGCCAGTCAAAAAGGCCCCAGCAGCG
AGCACCAAACAAGCCGCTCCGCCAGCACTGCCGCCGTTCGACTGGACCAAGTTCCTCACT
CTGNGTGGTAGCCATTGCGGCCGTTGTTGTAGGTTTCACCACTCTTCGGTCTCTTTCAGT
GTTTTCCATAAAAGCTACCGCATGATCCATGCTAACTCTCACCGTTTTCGGGTGTCCTCG
GACGACCTC
>NODE_13790_length_45_cov_142.511108
TGATGATTCTTCAGATGAGACAGATTGTGAACACTTCCAGTGCATTGCAGGGGAAATAAA
GTGCGACAACTTTCT
>NODE_13792_length_46_cov_67.108696
CAGGGGAAATAAAGTGCGACAACTTTCTTTGCATCGAAGAGGGATGGAAATGTGAGATCG
GAAGAGCGGTTCAGCA
>NODE_13817_length_47_cov_19.021276
GCTTTTACTTCTCTCTAAGAATGATGCATACGCTGTTTCATCAAGTCCGCCCCGTTTCTG
AAGATTGGTGAGAATGA
>NODE_13819_length_32_cov_122.750000
ATCCACCGAATCCGCCAAATCCACCGTATGGAAATCCAAAGCCGAATCCATTTCCGAAAC
CA
>NODE_13903_length_91_cov_58.758244
AAAAATAGGGATAACAGGGTAATCCAGACCCACCAGGGCCGAGTTCGGCGAGGTCCAGCG
GCGGAACCTTTCCAGCTAGATCCATACTATCTCCGCCTTTCAAAGAGTGGTACCAGGGAT
A
>NODE_13965_length_454_cov_17.174009
TTGAAGTTCATTGATCGATTAGCGAAGAATGCGATGTTTATCGAGGTTGAGAAGAAACTG
GAATACGTCCTCCAGGTTGAACTCCACGTAATTTCATTTCTCGTGCTTCTTGACAAACGG
CGCATGGAGAGAGAAGACACGTTGAAACAAAATCACTTGGATCTTCGGGAAGATTGTAAG
CAGCACGAAGTGCTTGTCGTTCAGGTTTGTGGACCAAACAACAGAGATAACAGTTTGATA
AACAGCANGAAGCCCTTCTAACATTCGTCGTGCTTCACGAACAGCAAGTCCAAACACCTG
GTTTGTTGTCTCTATTGTCAAACTATTTGTCGTTATGAACGTTGTACTAGGATAAAACGG
CCTAGGTGAATAGACAAGTCGTAAACATGGTTTGTTTATCGTTGGTGTTGTGGTCGGCTC
ATTTGTCTGACCCTGTAGAAATTTCGTTAGCTTCTAAGGTCAAAAGGTACGTCGGTATAA
TAAA
>NODE_14010_length_31_cov_3.193548
AGTTCCATGCGTTGTATGTAACATCTCATAAGTTAACCCCAGTTTCGCAGACTGGACAGC
A
>NODE_14043_length_31_cov_39.612904
TTTTATTGTAACAATGGCCGCGGCCTCCCCTGCTGTCCTTGACCTTGGCATGATTGGTAT
C
>NODE_14045_length_117_cov_56.521366
GACACAGGATGTCCACATGGAAGAAGAGCTTGACCATTTGTTGTATGGCCTGATGTGCAA
GTCGGCTGGCAATCGTTTCACTGTCCGCATCAGCCCTAGTGCCAGCTCTACTGACGTCAT
CGACGAGTCCACCAGCCTGAACAACGC
>NODE_14046_length_107_cov_3.140187
GGGTAATCGTGCACAGCGACAGAGTTCAAGCGCTGCCGCCAATCCTCACGGCTCTGAAAG
CCGCAGATTACTTCAAGCACCCCCAGTTATAGATCAACAACAGCCAACTCACCACCATCC
GAAACACCACCAGCGTC
>NODE_14256_length_606_cov_21.872938
GCTCAAAACATTTAAAAATGGCAGAAGAGGCCATTAAGTCCAAAAAGGATGAGCCCAAGC
GTGCTCAGCGTGCCCCTTCCAACGTTTTCGCCATGTTCCGACAGACGCAAGTCCAAGAGT
TTAAAGAGGCATTCACAATGATTGACCAAAATCGTGACGGAATCATCGACATTGAAGACC
TCAAGGACATGTATTCTAACCTTGGGCGTATCCCTCCCGACTCCGAGCTGAATGAGATGC
TGAAAGATGCCCCCGGGCCCCTCAACTTTACCATGTTCCTGAATCTCTTTGGTGAAAAGC
TCAGCGGCACTGACCCAGAAGACACCATCAGGCAAGCCTTCTCCATGTTTGACGCCGAGG
GCAAAGGTTTCATTCCTGAAGAATACTTGAAAGATTTGCTCTCAAACATGGGTGACAACT
TCACTGCAGAAGAAATCAAAGGAACCTGGAAGGAGGCTCCCTTGGAAAAGGGAAAGTTCG
ACTACAACACATTTGTGGGTATCCTGAAGGGCAAAGAGGACGATGGTTCACCATAAACAA
ACATCGCCTCAAGTTTCTAGAATCAAGCTCTCTTCTCATGACCTACTCACCATTTCAGAT
TCAATAGAAACAAGCAGATCGGAAGAGCGGTTCAGC
>NODE_14353_length_31_cov_52.967743
GCGGATGGAGCTGTGAGCACAGATGGCGCCAAATCTACAACATGGTGGCCTTCCGTAACG
T
>NODE_14355_length_52_cov_56.480770
TACAACATGGTGGCCTTCCGTAACGTCGCATCCGGCACTGGCGTCAACAACTGGTGGTCA
GGGGCAGACTATCAGATCGCCT
>NODE_14356_length_114_cov_74.666664
AAGGGCCGGGTCCTCACAGCTTGAGCACACCTGAATATGGGCGGTGCCGTCGCCATTGAC
CGTCACAGATTTACCTGTGCAGCTGCCGTTTTCATAGTTACCACTGATGACGTCACAGTA
GGTGCCACCAGGAAGACCCGTCTG
>NODE_14430_length_75_cov_47.133335
CGTCCTGTCCGCGCTGGTCCTGTCTGTCCTATCTCAGGGTCCCACCAAGGAGGCCGTCCT
CTGCACCGCCGAGAAGCTGCCCAACCCGAGCTGCAGGGACGCTGT
>NODE_14436_length_37_cov_4.837838
GCCAGCCAAATGTTTCTTTGCATTCTGTTGGTGAGTGGCCAGCCAAATGTTTCTTTGCAT
TCTGTTG
>NODE_14437_length_193_cov_2.046632
AAAAATTTAAACAGTTCAATCTTAAACAAGCGCAGAGAATAACATAGAAGAAAAAAAAAA
ATCCTTTAATATTCTTTAAGCTAACTCAATCATTGAAACTACTCACAATTTCAATTGGTA
ATCACAATTACTGCAGCAGGCTTTAAATTCAGCCACCTGTACAGACCTCGCTCACATTTA
ATAATACATGTATCAGAATGCAAAGAAACATTTGGCTGGCCAC
>NODE_14439_length_43_cov_170.906982
GAACCCCTTGAAACAGTCTGAGAAGCACCCGTGGGGGTCAGCCAGCGTGAAGGGGCAGTC
TGAGGCACACTTG
>NODE_14509_length_123_cov_16.422764
GAGAGTAGACTCCTTTTGAATGTTATAGTCTGAGAGAGTGCGCCCGTCCTCAAGCTGCTT
ACCAGCAAAAATCAACCTCTGTTGGTCAGGAGGAATACCTTCTTTATCCTGGATTTTAGC
TTTGACATTTTCAAGATCGGAAGAGCGGTTCAG
>NODE_14510_length_86_cov_67.290695
AATAGGGATAACAGGGTAATCTTTCCGGTTTTTTGCCATTGCTTGTAGAGTGGTGGCATC
ATGCAGATTTTTGTGAAGACCCTGACGGGCAAGACCATTACCCTTGAGGTTGAGCC
>NODE_14532_length_42_cov_29.380953
TGGACCACAACTGTGTCTCCCTTTTTAGCATCCTCATCAAGAGATCCCCTGGAAAGGAAA
CTAACATGATAG
>NODE_14533_length_32_cov_86.062500
GATCCCCTGGAAAGGAAACTAACATGATAGTATCTCCTTCCATCTGAACGGGCCGCAAGC
CG
>NODE_14627_length_92_cov_42.239132
TCCTCGCAGACTAACTGTCAAAAGTCTTTATCTCCCTGTGGGACGGTTCAACTCATCTCT
TTCGACCTACACAGCTTGTGGTCCTCACACTATTGTTGAATGTTGGCGTCAAACCTGTAG
CC
>NODE_14628_length_126_cov_69.936508
TTGTTGAATGTTGGCGTCAAACCTGTAGCCGGTCAGATCCGTCGGTGCAACATTCAAGGC
AGCGCACATCCTCTAGGAGTCTGCGGCTCTGCCCTGACAGATATGCTGCAGTTTGCGTGT
TCAACGTTGATGAGCTCTGGAAAGGTCAAGAGGAAC
>NODE_14633_length_64_cov_1.500000
TCTAAGTACAGTTTTACCCTTAACCTTGTCAACAGTTGGAGTAGTCATTATCCAATTCTG
ATTTATTTGTTCTCTTACAATACTTAAATCATAC
>NODE_14669_length_40_cov_64.925003
TTTCAGACTTAGACTTCCATTTCCAGCTGAACACAAAAATAATATGTCAGGTCAACTGAG
CATGTTTTTA
>NODE_14703_length_44_cov_4.250000
AAAAAATAAAAAAATAACAAGCAAACATCATTTGGCGGGTATAATCATGACTGTATACAA
AATTAAGCAAATTA
>NODE_14704_length_35_cov_21.628571
TCATGACTGTATACAAAATTAAGCAAATTAATTCCATGGAAAGTATAATCACCAAACACT
GACCA
>NODE_14710_length_33_cov_51.606060
CAGTGGACCAGTGGGCAAACACGGAGCATATATTGACACAGTATCAGGCCATGCAGAGCA
ACA
>NODE_14725_length_120_cov_294.774994
CGAGTTCCAACAATGCTCAAGTTATTCGTCCTCGCTCTCCTCGCCATGGCCGTGACCGCC
CAGGACCTGGCAGCCCAGAAAGCCCACGTCATGTGCGTCATTGAGACCCAGCTGTCCACC
GACTCGTGCAAGAGGACGGCCAAGTCTCAG
>NODE_14726_length_199_cov_80.673370
CGGGGGTGGGGGAGCTGTTTACGCAGGGGCCACGGTGGTGGCGTGAGCACACGGGATGTC
GACGTGTTCACAGATGAGTTTGTGGAGGATGTCGTAGTCGTGGGCGTTACAGCCGATGAT
CCCCAGCAACCCGTGGAAGGTCTCCAGGGTGGCGCATCCGGAGGCGGCGTCAGCAGCGGC
GTTGACCTGAGACTTGGCCGTCCTCTTGCACGAGTCGGTGGACAGCTGG
>NODE_14727_length_136_cov_8.882353
CGTACTTTTGCAATAGTTACAGACTTAACCATAGAATATATTTTTTATTTGATTCATTTC
TCTTTCTAGTCAGACAATGAAATCCATTATTATTATTAATTTTTTTTTGCGTGTGTGTCC
CTCCCATAACCTCGTGGTCGTAAGGGGTTCTCTTATGTTTCCATTA
>NODE_14735_length_45_cov_1.177778
GCGAAGTCAATAGTGCGCTCGCCTCACAAACTGAGGGGCGTGGGATCTAGCTCACTTTAA
AGCCACAATGATGAA
>NODE_14736_length_636_cov_5.723270
AAAATTGTAAATTTATTTAAATATAGTGTACAGGTTTCAGCGTACATATTTTTGTTACAA
ATTTCAGCATACATATTTTAAGTTAATATTAATGTACACATTTGATTGCTCCACTTCTTC
TTGAACCTTACAGTCAACAAAGTATTTTCCACTGACGTCTTGAACATCTTCAGATACAGC
TAAGTAGATACTAGTTTGAGCACCTTCCTCACCAGTCTTGCAAAAGATTTTAATGAATGT
TTGTATAGGAATTCGGAGAAGGACAAACATATTCTTTAGCAGATCAGTGGCAACGGAGCC
AGGGTGCAATACANTATCCTTAAGCCTCTTCCTGTTTGTATAAGAAATCGTCTAGTCACC
GTTGCCTCGGTCCCACGTTATGTAACCGTCAGTGTGGACAAGGTAGTTCGGAGAACCGTT
CAAGTGCACATTTCTCTTACTGTCGATTAAACGATAGTTTTATTGCTACCACCACATGTT
TTAAGAAAAGTCGGACGTTCAACAGTTTTAGTTAACAAGGTTTAAACAACTGGTAACTCC
TTTCTAACTGTTACGCTGAACCCCATCTAAAAAAGTACTCTAGATCGTCATTCAACCAAT
TTTCTTTACCAGGTTTTATTAAACGACTTTTGTTAGAGAGTTTCGGAAGTAGACATTCTT
GAAAAC
>NODE_14737_length_33_cov_152.303024
CATAGATATATTTAAACATGTCAACAATCTTCATGCCGCCGCCATCTTTCTCCCAGAATT
CCC
>NODE_14747_length_35_cov_195.571426
AACTACGATAATGCCGGACCATACAGCAGCAGCTACGCCTCAAGGTCATACGGCAGCAGG
TACGG
>NODE_14833_length_377_cov_7.702918
GTAAGTTCTAAACAATAATGGATCCCAAAATAGCTAAGAAAACTCAGGATACATTAGGAA
AAATTATAAAAAAGCCACCTTTGACAGAAAAACTGCTTGGTAAACCACCCTTTCGTTTTC
TTCATGACATAACAACTTCAGTAATAAAAACTACCGGATTTATGCAAGGACTATTTACAG
AGTCAGAAATGAATTCTGAAAATGTCAAGGAAAAAAATGACAAGATAGCATTTTTACAAA
AAGCAATTGACATAGTTGTTGCTGTGACTGGTAAACCAGTGAGTGCCAAGCCAATCAAAA
TTGTTGCTGGTCATGAGCCTGAAAGAACAAATGAGTTCCTACAAGCCCTGGCAGATGCTA
TCAATAAAAATGTAGACAACAATGAGTATGTGAAAAAAGTTCTAAAA
>NODE_14864_length_113_cov_234.327438
AACCAAGATAGACTTGCTTATCCCATTCTGAGAACCATCTGCAGGAGGTACCTGAGGTAC
TCTGGTCTTGAGACGCGGCCATCGCCGTTGGTGTCGTAGACCTTGAAAGCCAGGTCCAGT
TCATTCCTGTTGACCACACCGTC
>NODE_14865_length_109_cov_2.587156
CCTCGGTGTCTCCATCGACCGTCAACCATGACAGAATCGTAGCCGCGGGGTAGTCTGTGA
AGTTTCTTTCTCTTTTTGCGACGTGGACTTCCCCGAGTAGCATGCGACAAAGGACCATCT
TTAGCCTGTGTCCAGGGGG
>NODE_14866_length_31_cov_89.387100
TTCTGGGCTGAAGACAGTTCCAGAGTCATAAACGAAGTCAATCACTAAACCATAAGTGAA
A
>NODE_14875_length_71_cov_88.943665
TCGCTGCCGTACAGTCGACGATCAAACCAAGAAACCATGACCTCTGAAACTATTTTCAAA
GTGCTGGACAGTGACACAAACGGTGTCTTCGATATGGATGA
>NODE_14878_length_67_cov_63.089554
GTGACACTACCGTCCTGGTTGAAATCTAAATTTTGTAGGATGATCTGCATGTCCACGACA
TCGAAGACGCCGTTAGAATCTCTGTCTAAATTTCTGA
>NODE_14887_length_145_cov_8.751724
TGTCCTCTGAGCATAGGGACAGAATCTCATGCTGTACAAACGAAGTACTCCAGGCTTAAG
TGGAGGGAATGCAGACCCTTTTGAAAACGACTTCTGTGTCATGTTAGCCTCGTTAATTTG
TGTCAAATTTGAGCAATGTTTACCAACAATTGATAGACGCAGACTTGCCAGTTTG
>NODE_14888_length_35_cov_73.571426
CCTTCCAAACTATGTCAGACAGTTGATAATCGGTCCAATTGAGATCGATCTTTCAGAAAG
ACAAA
>NODE_14893_length_140_cov_51.200001
GTTAAAGCCATCTGATGCTGTCGTTCAGTCCGAGGTGGAATTCACAAATTCCTTCCACAA
TCCATTTTGTGTCTGGGACGATCTCACTAATGTCGACTTCATCGGTCGGCGACCACCCAC
ACCACCCACGTGAATGGTTGAAGATCACATTACCACGCAACTCTACCACG
>NODE_14904_length_31_cov_27.838709
CCCACCCAAACCCTTTTCTTCAACCCAGTGTTGATCTCAGTTCTCTCCTCCTGGTGTCAA
C
>NODE_14934_length_31_cov_2.096774
GGCCACCAGTAAGGTAAATCTTTCCATAGGCGAACAGACGCACATCAGACGGTTACCTCG
T
>NODE_15022_length_372_cov_3.602150
TGAACAGAAGACTGGTGATCGAGGAAAACTAGCGAAAGCATCTGGGAATTATGCGACTAT
TGTTTCACACAATCTTGAAGGTGGCAAAACCAAAGTGAAATTACCATCAGGTGCTAAGAA
GACACTCTCTTCATCCAATCGTGCTATGGTTGGTCTTGNACAAGCACCACAATGATACTT
GGGACAACTGGTAGGTAAACCACCACCATTAGTAGTTGTGTAGCCGTTTGGTAGTTGACA
GTCAGCAATGCGAGGTGGGCCAGCATTTCAGCCAGAGTAACGACGAGCAGCATGTCCAGC
ATAGGCACCATGTTGATAGCGGTTTCTTCTAATTAGATGGTAGAGAGTGAAAGAGATGTA
TGTGTGTCTTCTTTCTAAGTCAAAAACAAAAGAAAAATTTTG
>NODE_15023_length_68_cov_63.117645
CATCATTCCTTTACACTGTACAAGCACATTCTTAAAAGTTTGCGTAAATGTCCTCAAATT
TTAGTCCAAATTCAATGCCTCAGTAAATGTAGATTTTA
>NODE_15069_length_47_cov_134.297867
TTGGTGTTTGGTGTACACCTGTTGCTGCTGTCAGTTCCATTCTTTTCTGTAGCCATTGCC
TGGACTCTAACAAATGT
>NODE_15109_length_31_cov_44.451614
TACAGTTGGTCATCACAGTTTGACCACAGTGTCATACCAGCTGACGTCAGTTCACTAGAT
G
>NODE_15114_length_32_cov_215.781250
ATAATAAAATTACTTTAGAGGAGCTTAAGGAAGTGCTGGCCAAACAAGATCCTAAAAAGA
AA
>NODE_15118_length_123_cov_1.203252
GTGACCTGCCAGGGGGGAGGTATCAAAGGTCAACGGTCAAGGGAGAGGAGAAACGATAAC
TGTTTTCTAATACCAGATCCAAATTATGAAACGAAACAAAAACATCCAAAGTAATTAGCA
AGGTCATTTTTACAGATCGGAAGAGCGGTTCAG
>NODE_15119_length_185_cov_48.210812
TTTCTCAAGAAGTCTCTCATTCACCTCTATTAACTGGCCCTTGATGCAGCAGACTAACGT
ATACAAGCTTCCATCACTGCAAGTTACTTGACACAATGGGGCTTCATTGTCCAGCCACTG
AGCCCCCCTTTTTGACTTTCCAGAAAACTTGTTGTCAAGTCTGTTCCATCCTTTATTTTC
AAAGCTTACTTTCGAGATCGGAAGAGCGTCGTGTA
>NODE_15122_length_35_cov_37.599998
TTACCCCATGGTGGAAACAAAGGGCAGACCTGGTCAAAACCCAAGATCGGAAGAGCGGTT
CAGCA
>NODE_15161_length_152_cov_1.250000
ATACATGTACCTCTGATGAGTTTGTTTGTGACAAAATCTACTGCATCAGCAACCTTTATG
TATGCGATAATGTTGAACATTGTCAAGATGGAAGCGATGAATTTAATTGTACAAGAAGAG
GTCCAGATTGTGGAACCTCCGAATTTCTCTGCACAAGTACTCAAAAATGTGTATCTTTGT
CT
>NODE_15164_length_31_cov_4.967742
AGCAGCTACTTTTCCAAATGCTGAGAGTTAAAATGAGATCCTAACATACTTTTTTTCAAC
C
>NODE_15166_length_222_cov_24.135136
CAACCTACATTGAAGGGGCAGCAGGCAGAGATCCTCAGTTCCCCATCCGCTTATGGAATC
ACCATGATGCAGCTTTTCAACAGTGCCCTAAAACAAAAAACTGTTGTGAGAGATTTCACA
ATGCTCTTAATTCATTATTCCACTGCAGTCATCCCAGTATATGGTTCCTNACTGTGACCA
TTTATGAGTCCGTCCGGTACATCTCCACATTTTTAATTTTATGGTTCTAGAAGTACATAA
TCAGCGATTAAG
>NODE_15173_length_59_cov_7.491526
TTTTTTTTTTTTTTTTAATCAAGTATTATTTCTTTAATGGGATGTATTCATGTCAATAGA
GGAATTCAGATCTTCTGCCCAATCTAAGT
>NODE_15294_length_49_cov_27.836735
TCCATGTTGATTTGGCGATTTATGCCTGCCTCGTTTTCAGCATGGTAGTTTTGGCGAGCT
TGACTGACTGACATTTTTT
>NODE_15321_length_37_cov_11.216216
ACAAAAAAGAGCTCAAAGGGAGAGAAGCATCTTCTAGCACTGATCCCGGGACTCTTGTCA
ATAAAGT
>NODE_15323_length_31_cov_22.677420
CGGGACTCTTGTCAATAAAGTTTCAAGCCTGCCCATAAAATACTCAGGAACATCCCAGGA
A
>NODE_15402_length_437_cov_4.478261
GGGTAATCAATCCTATTCCTGGTGAAGCTACGTCTTACCCCAAGCCACAGCCGTCGTTTG
CTACGATGGCTCTCAACCTGTTGAAAAAATATGCCCTTATTGTTGTGAGGTTCTACCTGC
TAGGTGTGTTGTACGCTCTCTTCTGGCTAAAGAAGATTTTCTTACGAGCCCTGGAGCCGC
TTGAGCCCGTGTTTGAACAGGTCAGGAAGGTGCCCCGGAAGGACATCAGTGCCGAGGGCA
TCTTCTANTCCGACGTCAAGGACCAGGACGACATGAACAGGGGGGACCACCAGCCACGGA
AGTGGATGGACCGGGTCGGGGACCACACCCGCTCTCTGACCTACGACCGGAAACACCTGC
TCCTGCCGTCGTGCACCCCGTTCATGAGGTTCCGCCTCATCTTAACAACCTGTTCAGTTT
AAATATCGATGAAACTAGAGAACACACAACCAACTGTGCTGTTTAAA
>NODE_15404_length_225_cov_48.680000
CATTCGGATCCCTCGGCTCAATCCTCGGCCGCTTTCTCCATCACGTGGTCGACGAGTGGG
GGAAGTGGTTCGACAAAGATGGCAACCTCCTTGAGGCGCACGCCACCTGGTGGTCAAACA
GCTCGCTGACCGCCTACGAGCCCGTCAGGAAATGTGTTTACGACATCTACGACAACATCA
CGAAGACCTACGTGTTTCCCGACGGCGTGTCACGCGCCGTCAAGGTCAACGCTGCCCTCC
AAACGCCCTCGGCCA
>NODE_15405_length_221_cov_85.742081
CAGGACCCGGCCGCCCGGAAGGCCCACATCCTCTGTGTCATAGACACTCAGCTGTCCTCG
GACGGCTGCAAGAGGACAGCCAGGTCCCAGGTCGAGGCACAGTCCGGCTCTGACCCCGCC
AGCGCCTGCGCCACGCTGGAGACCTTCCGTCCTCTTCTGGGCATCATCGGCTGCACCACC
GCTGATTACGACGCTCTCCACAAGGTCATCTGTGAGAATGACCAGACTCCTTGTACGCCC
GCGGCTTAAAA
>NODE_15406_length_97_cov_52.175259
ATATATATAAACTCTTAATTTATTGCATTTATTTGATGTGAATAAATTCGTCATGGCCGA
CGCGTCGTATTGTCAATACACTTCAACGCGGTGCCTCGGTTGTCATGGATATAATTTTAA
GCCGCGG
>NODE_15409_length_53_cov_179.905655
AAAGGTGCATTATTCCGTCATGAGATAGCCTACGTGTTGGGACAGATCCAGAGTGACGCC
TGTGTGCAGCAACTGAAAGAGAA
>NODE_15426_length_61_cov_67.737701
ACAACGATTGTGGTACTGGTTATGACGAGGCCAACTGTACCTCCTGTTTTGCCAGCCAGT
TCCAGTGTGCTGACCAGTCCAGGTGTATTGA
>NODE_15427_length_82_cov_122.121948
ATTCACTGGGGTGGAGGGTGGGACATCCTAATTCATCAGAGGCGTCGCCACAGTCGTCAC
CGCCATCACATCTCAAGGAGATGGTTATACATCGTGTGTTGGCACATTTAAA
>NODE_15428_length_69_cov_75.782608
CTACAGATAATAGAGTTGATGAAATTTTGACTTTTGGCTGTAGCGGAAGGTCATGTCAAG
GTCCTAAGTCTGTGTGTGCGATGAGTCAGGGAATTCCCA
>NODE_15430_length_32_cov_128.312500
CGTTCAGGAGACTTTCGACCCGTTGTGTCCATCACCTGCGTGGTGGCAGCCCTACCTTTT
TT
>NODE_15438_length_60_cov_25.283333
TGGATTCCTGTGTAGTCTGTTCGGTCGCCGTAGTATAAGCGACCTCTGGTCATGGCTCTT
CTAAATGACGTCATCTGAACCTCGGAGTCA
>NODE_15441_length_124_cov_138.814514
GGCGCAAGCGGCCTACGACTACACGAACAACAAGACGTACGTCAAGCTGGTGGCCATAGA
GCTGAGCCCGCTGTTCCCACAGCCTGTCAAGTCCGAGTACACGATACTCACCGATTACCT
CAAAGGAGTTCAATATCAGTTTACTGATACACAC
>NODE_15468_length_77_cov_3.038961
GGGTATCATGTCAGTCATACAACATTGCTAGACATTTTTGTTTCAAATGCATTTGATCAT
CTGTAAGGAATCTCATGTCATTTCAGAAGCAGATTAGTATTGGGGTA
>NODE_15611_length_191_cov_8.973822
CCGCCAGGTGGCCGAGGACAGGAGTGGCTATCTGGAAGACAGAAGACCATCATCCAACTG
CGACCCGTATGCTGTGACGGAGGTTTTAGTACGAACCACCGTGCTGTCGGAATAAATTTG
AACTGGCGAGATCGGAAGAGCGTCGTGTNTGTAAAAAACGTACAGTTTTCAATGTAGCCC
AAACAAAGAGCCTCGAGTTTTTGTAAAAATTTTTAATAAAA
>NODE_15698_length_42_cov_204.904755
ACCAAGAAAAATGTTTGTCGTGCTACTCACTGCGGTGATTATTCCGTTTGTTGTCTGTGG
ACCAGACTCGTC
>NODE_15752_length_38_cov_296.342102
AAAGTCTGTCGAATTAATGAAGTTAGTTACGCCATTGGGACAACTGTGGGCAGACTAGTT
AACCCTTG
>NODE_15823_length_272_cov_3.187500
TATGAAGCTTGACGTCGCATAGAGGCGTTGCTCTACTTTCTCCTCCATGTGGAAAAGATA
ACTAATGATAATGCTGTCAATAACTGTTAACATAGACAGGATAAGTAGAACGAAGAGGTA
GATTGTGACCTTTGGCATCGTCAGGGATGACCTTGGAAGCATGCCGCTAACTATGCTCAT
AAAGACAGACAGTGCCAAAAGAACAGTTATGCCGTAACCTATCTTCTCTCCTGACTCTAC
AGGTATCACGAAGACCAGCAGGTTGAGGAACGACAGAAGCACGACGGGAAGAACAATGTT
TA
>NODE_15824_length_46_cov_69.326088
TTAACTCAATGATGTAATGGTCTGACTGCACGAAGGAGCCGTAAGGTAACGTTAAAGTGG
ACTGACTAAAAAAAAA
>NODE_15825_length_100_cov_52.980000
TCACCGTGGGCGACCACTCCACATACATCGTCCAGGGACGACCCTCCAACCCATGAGCAA
CCCGTGGGTTGTGCCTTGACCCGGGAAACAAACGACCAACCACCGCCATCGTATGATGAA
GCCTGCCAAG
>NODE_15834_length_100_cov_1.640000
CTGCGGGCGGCCTCCGGGAAACCAAAGGCTTTGGGTTCCGGGGGAAGTATGGTTGCAAAG
CTGAAACTTAAAGGAATTGACGGAAGGGCACCACCAGGGGATTTTAAGACCACCAGATAG
ACCGAGAAGA
>NODE_15843_length_194_cov_9.381443
CAAAGTACGCCACTCAGTCGTTTGCTCCACTTGGAGCAGCGACTCCAGGTTTCGTAACAT
CTTTTGAATACACCGGCTTCCGTCTCTGGCACAGACAAGCTCATCAAAACAATGAGAACC
ATGACGATGCTCAATTGAGTAATCGATACCATGTTCACGCCAAAATTGTTCAAATCCTCT
GACGTAACTTGAGAAACAAAATAGATCGGAAGAGCGGTTCAGCA
>NODE_15844_length_48_cov_26.916666
TGCCCTCACCAGTGTACCAATGGAGGAAAGCCTTACGACGGAACATAGCTGTGAATTCCA
TCTCGTCCATGCCCTCAC
>NODE_15851_length_110_cov_6.827273
TTGGTACACTGGTGAGGGCATGGATGAGATGGAATTCACTGAGGCTGAGTCCAACATGAA
TGACCTCGTCTCTGAGTACCAACAGTACCAGGACGCCACCGCTGAGGAGGAGGGAGAATT
TGAAGAGGAAGAGGGAGAAG
>NODE_15852_length_118_cov_4.618644
GAGATTCTTTTTTGGAAAATGAAACTATTTATCCTGTGGCCAGACTCTTTGATGATCCAG
AGCCTATAGCACGAAAGAATGCTCATATGTGTGTCATGAGGGTATCAGAGACTCCCCCAG
GTGCAGAAGGCATTGTGCAGGCACAATT
>NODE_15853_length_87_cov_5.839080
AGGCTGTTCATGTTTGAGCAATAGTGTAAATGCTTCCATGGCATTTGCTTCAAGTGCATC
AGTTGTGTCCACCCTCATACAAAAATGCAGAGTGTCTAGAATGATGTCCTTTATATT
>NODE_15881_length_31_cov_1.935484
TAGTCTACAACCAGTTAAAATGGCGTCAACGTGGTTACTTTCATTGATCACGGCGTGTGT
A
>NODE_15907_length_194_cov_73.948456
AAGCCATCAGGTTTCTGTGTACATGTACACTCGTACTGGCATCCCTCTCTCCAGGTCTCA
CCTGGCAGGTGGGTCACCCCACTGGGGTCAAGGCAGTACTCTCCTGAACAAGTGTCTCCC
ACCAGGATTGGACAACACTGACCCTCCTGCTTGACCTCGTTACAGCCAGGAGGCAGGCTA
ATGTAGTGGGGGCAAAGATCTGAGCATTGGATGGACATGAAGGT
>NODE_16077_length_83_cov_63.265060
TACAGTTGGCATCAGCGCTGGCCTGGTAACAGCTTCTGTGATTGTTGAGGGCGGGGAGGT
CGTGCTGTACTTCGGCGTTAGATGCTGCGACACCTCCTGAACGCCTTCCTGTG
>NODE_16078_length_40_cov_11.750000
ATTCTGCTGGCAATGGTTACAACAATGCTGGAAACGGTTACAACAACAACAGAAATGGTT
ACAACAATGC
>NODE_16086_length_31_cov_26.193548
GTTTCTTGTTTCATTCTTCTTGTTGACTTAATTTCTTGTTTCATTCTTCTTGTTGACTTA
G
>NODE_16164_length_48_cov_72.458336
CGCTTTCGGCGCATAGAAACAGTATTGTTTCTGCGCCAGTTCCTTCTCCTTGATCCACCA
ATAGTTTTGTTGAAAAGA
>NODE_16187_length_185_cov_22.870270
GGCTAGGGATAACAGGGTAATACACGCCCAAAAAGCACAGCTGGAATGCCGTCCCACAAG
TCGTTCAAGGTCAAGAAAATTCTGGCCAAGAAGCAGCACCAGAACAGATCGGAAGAGCGG
TTNCTCGACATAACGCAGGTACCACACACAGTACCAGTCAGAGACTAGTAGTGGTACCGC
CTTGTAGAGGAGACTTGTGCAAGCAACCTTCTTTT
>NODE_16188_length_75_cov_114.226669
CACCAATGGGGAGTGTATCCCACAGCTCTTCTACTGTGACTCTGGGCGGGACTGCAACGA
TGGTTCTGATGAGGTCAACTGTCCTGCCGGATGTACGTCAGAACA
>NODE_16258_length_70_cov_10.600000
GTCTGGTGTATAGCACGATGAAATATCAACCAATCCATTGGATTGATCTGTACTGTACTC
AAAAAACACAGCAAACCAGATCGGAAGAGCGGTTCAGCAG
>NODE_16279_length_222_cov_7.779279
CGTATGCAAGAACAAACACATACAAATTCTCGTTCTTCCCGTCCAGACTTCGTGCGTGGG
ATGGGTTGCTGAGGTGACGCATGTTTTGGGAGATGGTTCGCTTTAACGTGCCCTGTACTT
GTAGTGGTGCCCGGAACTGGTGCTGGCGCCCTATTCTAGTAGTGGCGCCATGTACNGGGA
CATGACCACCAGGGAACACGAGCTTTGATTTTGATTCTCTTAGTGTCCTTCATAATGGGA
CAATAGGGATAA
>NODE_16367_length_31_cov_13.612904
TCATTGCAGTGAATTGTTCCGTTCCTGCCGTGTCAAGAATTTCTAGCATGCATTGTTGGC
C
>NODE_16411_length_124_cov_16.209677
CCCTACTACTGCTCACAGCAGATCAACATCCCCCCAGAACTACCCGACATTCTCAAGCAG
TTCACCAAGGCAGCAATAAGAACACAACCTAAAGATGTTTTAGCCTGGTCTGCTGCTTAT
TTTCGGGCAATGTCTAAAGGTGAAATCCCACCAG
>NODE_16471_length_31_cov_69.903229
GGAAACAAAGAACGTGGGCATTTTCTGTTTATCTCTTCGATCAGCCGTTCGTTGTTTTTT
T
>NODE_16472_length_57_cov_56.192982
AGCTGACAGCATTTCTGGGATTTCTGTACTCATTGATGGCTTCGGCGATTGTGAACGAGC
AAGAAATGCCGTTGCTATCTAAGGATG
>NODE_16473_length_97_cov_48.577320
GGCGGAACCGATTTCGGTCACAAAAATCACTGGGTCTTTGACCGCAACGACAGAAACGTC
ACCTACACCAAGTGGGTGGCGGGAAGACCGTCAACAACTGCCACCTACAACTGCATGTAC
CTATCCG
>NODE_16475_length_42_cov_13.904762
ACTGCATGTACCTATCCGGACCTACCTGGACGATGTATGATTATATATGCTTCGAGGTCA
CTAGAAATTATA
>NODE_16488_length_200_cov_1.585000
TTCATTTGTAATGCATGTACAAAAGTAGCCAGTGGCTCAACATGACACAACTGTCAATCA
AGTCTAAAGGCAGCGGATGACCAAGGTCAAGGTTGAACATGAAAACCAAAACAAATGATA
GTTTTAATGACATTACCAAGGGAAGGAATCAAAAAATGTTGTTATAAGAAAATCAATATA
ATATACATTATTTTAAAATCTCTTATCTTATCTGTTTACAGACGCTCCTT
>NODE_16534_length_39_cov_132.769226
AAAATCAGAAGAACGCCTGCAGAGAGCAGGGCTGCGCGTGCACGCGGACAGAGCGACCCT
CCATCCCTC
>NODE_16569_length_62_cov_59.612904
TTTTTTCAAGCTGCTTAAACTTTCTGCCCCTAGCTGATTTAAGATTCCAGGCAGCATCTC
TGCAATCTGTTTGTTCTCAGCATGACCAGTAA
>NODE_16598_length_67_cov_47.597015
AAACTGCGTTGATGACTACTGCAGTGGGTGCAAGACCCGTTGGTACGTCAGAGATGTTGA
GGTGACCAAGCAGTGCGTGACCTTATTAGCACCAATA
>NODE_16608_length_98_cov_7.295918
TTTGTTTTTCAAGAAAAGCTACTTTGGAACTTACCCACAATCATGGAACAGAAAAAGAGG
AAAAAGAAGTTTACCACAATGGTAACTCGGATCCAAGGGGATTTGGTCACATTGGTATTG
TTGTGCCT
>NODE_16609_length_80_cov_4.650000
TGTTCAAAGCTTTATGACGTCACATTGGAGGAGGGGGTCTAATTTTTTGTGACGAAGGTG
GACAAGGCTGGAGGGGGTGAAAAATCGATCAAAATCGCTTGACGTCTTTT
>NODE_16613_length_128_cov_13.695312
TACTGCTGTACTCGAAGGCAACAAGTTGGTGGAAAAATATAAAACGGATGATGGCGTTGC
CTGGACGACAGTTAGGACAGTCAATGGACACACTATGACGGCAATCACACATGGTGACAA
TGAAGATGAGAAGTGCACAGATCGGAAGAGCGGTTCAG
>NODE_16614_length_126_cov_46.817459
TCCCTATTTTTTTTTTTTTTTTTTGATGTAGATATTAATTTATTATTCCTAGTTATCCTG
TTTTGTGGATGGTACACGCGTTTGATGGTGAATGATAAATGAACAGTCAAATTTTGATGA
GTTCCTGGGTGCACTTCTCATCTTCATTGTCACCAT
>NODE_16648_length_60_cov_64.949997
ATTCCTGTCGATGAAGTTGCTCAAGTCAATGTCAATATCGAGGAACATGGATGTCGCCGT
CAGGTCATAGGGTTGCAGGCTCAGTTGAAA
>NODE_16653_length_74_cov_239.229736
CTCACTCGGCTCGCGTCTAATCCTAAACACATTTAAGGATATACAAATCGTCGAGGCTGG
ATCGGACCGGCTTCCAGTTCGGCAGCAGTGACGTGGTCGGGTTG
>NODE_16654_length_37_cov_380.405396
CAGTTCGGCAGCAGTGACGTGGTCGGGTTGGGAATCACCTCTGCCGTGCAGGTCGTCCCG
GGGGTGC
>NODE_16662_length_264_cov_8.875000
GGGACCTACTTCGTCATGCAGCCACTCATCGTCATAGAACTGCTAGGGGCACACAACTTC
CCGTCCACCATTGGCATCTACTACGGTCTGACGGGTGTAGGAGCTTCCATCTCATACCCC
ATCTGTGGTGCACTGCGTGACATGGGCGGCTCCTACACGTACTCATTCAATTACCTTGGC
CTTGCTGCTGTGGTGGCGGCCATCATTCTAGTCATNCGGTCCGTCATGCTGTAGTTCTCC
TTTCATGAGTGACTGGGTCACTCGAACCTGCACCTGCCGATTTGATTGTGAACT
>NODE_16665_length_46_cov_173.369568
AGCTCGATTACGTTTTGGGTTTGAGGCTAGAGGACTTTTTGGAAAGACGTCTTCAGACTC
AGGTGTTTAAGTTGGG
>NODE_16704_length_77_cov_5.545455
TTGAGCTTTTTTGGGGGGCGGTACTCCTCAGCAAAGTTTTTGAATTCCATCCATTTAGCA
ACGATTTCCTTGGTTAATGAAGTAGGAACTTCCTGTGTCTCTTCCTC
>NODE_16705_length_31_cov_6.322581
TGAAGTAGGAACTTCCTGTGTCTCTTCCTCATTCGAGCCTGAAGATAGTGCATCCATCCT
A
>NODE_16792_length_163_cov_1.797546
GAGGACAGCTCTAAATGATATATATGTCAAGGTAAAAAATATTTTTCAACTACCCTTTTG
AATTCACCCTTCGTAAGAATGTCATTGGTTTCTTAAGTTAGAATTTTTTTAATGTAAATG
TTCATAAGCTATAAAGAATATAAGATAGACATATAGCAATCTTTAATCACTAATAATGAC
CATGTCATGACTT
>NODE_16793_length_219_cov_7.073060
TGTGGGTAAATATACCAAGTTCTGGAACATATTTGTAGGGCTTGGAACGAGCTGGACCCC
TGCTTGTCCTGGGTATCATTTTCTCCTTAGGTATCTCCACCGGCACCAAAGAAGATGCTG
GGGTATCTGTCTCCAAGTACACATCAAAACACATGAGAAGTCTCTGCAACTGATTGGGGA
GTAGCTGTTTGCGCGTCTTGCCAACAATGAGTTCATGAAAGTGCAAATTGATCTCCTCCT
CCATTTCCA
>NODE_16920_length_55_cov_129.090912
TTGTTTAGTTGATCCAGGTAGGGACAGAAACTGAATGACTCTAAAGATTGGTCAGTGGCT
AAGGCTCCAATGATGGCGACCTGGA
>NODE_16965_length_54_cov_94.037041
CAGATTTACAGAATGGACTACACGACACTTTTTGTACTGCGATTGCTGTAGTTTGCAGCG
TCAACGCAATCACCTGCCCCTTGT
>NODE_17091_length_87_cov_5.908046
AATTAAACCACAGTGATCTCCCCTGATGTGACCACGTGATTATATCATTATTTCATTGGT
TGATTGCGAGGCGCATGCGTTCTGGGTTGAATGCTGGCCTAATCTGATGTTTGTTTC
>NODE_17092_length_98_cov_2.938776
TGATATAATCACGTGGTCACATCAGGGGAGATCACTGTGGTTTAAATAATTCTTTCATTT
CACCCAGACCATCAACAACTAACTGACTGACTGACTGTGTGACCAGGATGACCACAATAC
AATGGCCA
>NODE_17119_length_92_cov_79.565216
ACACAATGGTCCCTGATGACGTCTACCCCACGACGGTGCCGGCCGGACAACGGGTCAGCC
CTGGGTTCAATGCCGGGTTGTTGTTGGCGTACACCTGCACCAATATGTTGAAGAGGGCGG
GG
>NODE_17140_length_32_cov_161.906250
AAAAGAAGGAGCCCTTTCAGATGAATTAGCAGCTGCATTGAGAAAGTTCTGGAAGGCGAA
CA
>NODE_17141_length_90_cov_113.088890
CTGCATTGAGAAAGTTCTGGAAGGCGAACAAGATAAAAATTCATGACAGCATTGTTTCTC
AAACAATGTGGGGGAACACTTTGGAAAAAGTAGCCTGGCGTGTGGATCTAAAAACTCAGT
>NODE_17145_length_73_cov_293.027405
GAAACAAGAAACATGGCGGATGAATCTGTATCAAGGCCTGTCAGTGCCGGTGGATTGATA
GCTACTGATGCTGTGGAGTCACAGGATGTTCCAGAAAATATCC
>NODE_17170_length_836_cov_3.807416
GATAATCTGACAACACAACATTGACGGAGTGGTGTCAAGCAGGACAGACAATCGTGTTCA
GCTTTCCCGAACCCTTTTCCGGTGTCATGGTGAAGAATAAATGAATCAACTCCAAAGTCT
TTAAACCTTTCAAAATGATGTCTGTCGATGTTACCGATAAGAAAATCAAACACAGCCATG
TCCATAAGATCCAGGAGTGTTCTTCCTCTGACGTATAAGTCTTTTTTCTTGATGTCTGTC
TCGCAGTAGTCTGTGTTCTTTTCCCACTTGTTCTTTTTGTTCACGAATGTTCTTTGATAG
GGATGTTTTTCTCGAATTCTCAAGTTAACGGGCAAATAAGCTACAACAGAACCTTCCAGC
AACTCCGGATTTCCGCAGGCAGCGTTCGAGTGATCACAGTGCNGTTTATTCGATGTTGTC
TTGGAAGGTCGTTGAGGCCTAAAGGCGTCCGTCGCAAGCTCACTAGTGTCACGTTCGTTA
CCGGTAGTTTCGTTTGTGCAGGTAGACCTCTACACTTATGTGAAAAGGAGTTTCTGAGCA
GGGGCGCATTTCACTACAGGTTACACTGTAAATATAAAGACGGTTATCGACCTCCTTGGG
CTATTTTAGGTTCATTAGACAGTTCTACTTTACGACGATAGAGGCGTCACACCGAAAGAT
CTAGATCTATCTTGTTAAATGGGACGTTGAAAAGATCAGGAAATGGGACCGCAAAACCAA
ATTTATTAGGTTCCGCACGTAGTAGCATACAATTAAAATAGAACACGAAAACAGGCGAGA
CAAGGAGAAGACTGTCTTGTTAGAAGGCTGGTGACTCCAGGCGGTTTTCCAGAGCCTGTC
AACACAGCAGTAGTCCCAGTATGTCC
>NODE_17222_length_178_cov_8.134831
CTTTGGGCTCTTATGCAACAAGTGAAGTTCGGCTGGTTGAAATTTTGGAACATATTTGTG
ATGACAGTTCTAAAGAGTGTCATTCAGTATTAGAAGAATATGAAGAACTGGTGGAAAAAT
ACTGGTTTCAAGAATTGGCTCAAAAGAAAGATACTGATTTGTACAATTACTTTTGTATTG
ATCATGTACAAGCTTGTTGCCCTAACAA
>NODE_17232_length_37_cov_80.756760
CAGTGTTCATCACTCATCTTGCGCATGGCGTTGTCCATTTCCATTCGTCGGAAGCGTGGT
GGGTTCG
>NODE_17275_length_158_cov_1.886076
CCCACCGTCAACGGTCTCAGTAAAGTTCTGTCTCACCTGGTGTCTTCCGGAAACTCGGTC
CAAAACGCTACATCTTCATGATTTCTTGGTTCTTCCTCTTCGACGTTTTCCCTGTGTGTT
CCATCCGGGTGCTTGATCTTCCTTGTTGGTGTCTTTTCTCAGGATGTGTCATGTACTTCT
CTCATTTT
>NODE_17368_length_41_cov_551.731689
ATGCTTTTACTCTGACGAAGAAAAGAAATGGGAGTCGAAGTTGAATCTCTCAAGCCTGGC
GATGGTCAAAC
>NODE_17395_length_63_cov_117.047623
TTGGTGGCCCTAGTTTACTCTACACAGGGCTCCACAAGTATTGGATTCGGTTGTCCCGAT
GGAGTTAAGGCAGGCGACTCCTGGTATGAAGAA
>NODE_17409_length_31_cov_1.000000
ATGGGTTCACAACATCCGGGGTATTTCAGGTCTTCGTCAAAACTCAAAGTGCAGCCAGGT
T
>NODE_17461_length_32_cov_36.062500
TTGTCATCGGAGCCTTCATGGCCGTGAGTTTTATTGACGTAGCCGATGCTGGCATTGTCA
AA
>NODE_17472_length_55_cov_154.581818
GCGGATCCTGTGGTGACCTTCACTCAAACAACTACATGAACAACTGTGGCTACAGCGCTG
CATTCAACTTGCTCAACTTCATCTA
>NODE_17486_length_93_cov_133.645157
CTGTGTCTTCTGTGTAGTATTCGTAGTCTCATTTGTACTTGTAGCTGTTGTAATCGATGT
TGTCGTTGTAGGTGCAGTTGTGGTTGGGGTTGGAGCATTCGAAGATAAATCTGTAATGTC
TGG
>NODE_17527_length_46_cov_175.434784
CTTGGGCTGGGGACCGTCACCAACACGCTGACCGGTCTGGTGGACACCTTGGTGGACAAG
ACGACGGACATCGTCG
>NODE_17534_length_41_cov_124.097565
AAGATGATGGTTTGTCGAACAGATTTCTTTGTATATTATAGCGTCTTGTGTTAAAAAAGA
GCAGGTGTTTT
>NODE_17546_length_227_cov_24.299559
CAAGGATCTCAATTTCGGCCACGGCACCCTTGGGGAGTTCCTTGACAGCCACGCAGCTTC
TTGCTGGCTTGTGATCTCCGAAGTAAGCTGCGTACATCTCGTTGAATCTGGCAAAGTCGG
ACATGGCTGCCAAGAAGCAGGTGGTCTTGACGATGTCAGTCTTTTGAACGCCAGCCTCAG
ACAACACGATATCCATGTTGATGAAGATCTGCTTGACCTCAGCATCAAGTCCTCCTTCAA
CCAAAGCTCCAGTCTCC
>NODE_17547_length_93_cov_2.193548
TCAACACAGTCTTAGAAAGTATTGGTCAAGCAAGGGATTATGTCATACTATCCACTGTGA
GGTCTCTCCCTGACTCCTATATTCAGTATCCACCGAGCCGTGAATGGACTAACAAACATT
TAG
>NODE_17548_length_272_cov_2.687500
GCTTTATTTAAATTCTTCTCAAGGCAAATAAGAGACGTCATATTTTAGCTGTTATGTTGC
AATGAGTTTTCCAGTGAGTCAAGCATTGAGAAGCAGGTCTTTCACACTTAAGATCACTTT
CTTGCAAGAGGTTCCCCATGATTGCAACATTGGATTTGAATAAAAAATGTCTTTGAAAAG
CCACTATGACTGCATGGAATGGAGAAAGTTCCTTGAATCAAGCTGAAGGCTCTTTCTTTG
TCGGTACGTCACCAGCAGAGAGTTCCATGGCTTACAGCTGCGCAAAAGTTCTTTGTTGCC
TA
>NODE_17592_length_130_cov_52.000000
AGGCTATGTGTATTCTTTTTCTGTTCATCTTTCTATTTTTCTCTGCTCTTTGTTCAAAGA
CAGCTTCTGGTGGGTCCGGTGGGGCCAGTCCAGCGGTCATCTTGTAGTACACCACTGTGG
TATCCAGTTCATTTATGGCAAGGATGAAACTATCAATAGG
>NODE_17593_length_37_cov_45.972973
TTTCCTATTGGAGTTGATGAACGGTTGTCACTGAATGAGTTTCAGCAATTCTTTTCTCGT
ATATTTG
>NODE_17594_length_43_cov_80.790695
AGTTTCAGCAATTCTTTTCTCGTATATTTGTTGATGAGGAGCCTATTGATAGTTTCATCC
TTGCCATAAATGA
>NODE_17595_length_31_cov_1.322581
TGCTGCAAAAAAAGTAGTGTGGCGCCCAAAAATATCCAACCACTGGCCACTAAAACCACC
A
>NODE_17596_length_117_cov_5.264957
ACTAATACTAATAGGCTCAATCACCCTGTTCTTTCCAAATCTGATTAAACCTGGAACTCT
CCGGTAACGAATATAAAACTGTAAGGCGTCAGTGAGCTTCATGATAATGTACAAATATTA
TTTGAACAGATCGGAAGAGCGTCGTGT
>NODE_17597_length_38_cov_51.184212
TCTATTTGACCCTAACTATAATTCTCAATGAAATCTTATCTGTTATTAAGTTCAAATAAT
ATTTGTAC
>NODE_17691_length_59_cov_140.050842
GGATTTGGCCAACCAGCAACAGCACATCTCTGACGGGCCCCCGTCTGACGTCATGTCCGG
TGGTCCTCTATCTGGGCGGGGTGCAAATG
>NODE_17696_length_216_cov_29.875000
TTGCGTGCCCGTACATCAACATCAATATCCCAAAAGCATGGCGGACGCCAAACTGAAGCT
CTTCTATTTTGACGGCCGTGGTCGAGCAGAAGTGGCCAGGATTCTCCTAGCAGCTGCTGG
CAAGGAGTACGAAGATTTTCGCTTTTCTGAGGAGGACTGGCCCAAGTACAAACCCATGAC
CCCGTACGGACAAGTCCCGAACCTGCACGTCAATGGCGTGGTTTACGCCCAGAGTCTCGC
CATCTT
>NODE_17697_length_32_cov_132.625000
AACTTGACCGTACGGGGTCTGGGGTTTGTACTTGGGCGTAAACCACGTCATCAACCTGCA
GG
>NODE_17974_length_346_cov_11.945086
CTGCTAAGCGCCAACTCACTGAAGCGGCCTGAACGGTCCATTGTCCTAGAGAGGACCGAG
CTGGACGATGGCGAGTTACTGCACCAGGACCCACAAGCCATTATCAGGACATCACATGCG
TCTGACCACGGCGGGGTCGAATGTAGGTCAGCTGAGGACTTCACTCTGCTGGACACGAGA
AATTGGTTCACGCAACTACCTGAAACAGAAACGCACCATTTCAAGTCCTCGTGTACTTAC
AGCGTTTAAATTATGCTACCATCCACCTCCACCATTTAAAACATTACCCATCATTTACCA
AAACATTTCATACAACTTTAAATAAGATCATCAAAAACATCCCACTACCGTTAAACAATG
AAATTGACTGGGTTTA
>NODE_17975_length_44_cov_45.954544
AATTTAAACGCTGTAAGTACACGAGGACTTGAAATGGTGCGTTTCTGTTTCAGGTAGTTG
CGTGAACCAATTTC
>NODE_17976_length_305_cov_11.950820
TTTCCCATTTGTACATGTATTTGTTTTGTTTTTGAGGCTGGACAAGATGTTACCTCGGAT
AAACCCAGTCAATTTCATTGTTTAACGGTAGTGGGATGTTTTTGATGATCTTATTTAAAG
TTGTATGAAATGTTTTGGTAAATGATGGGTAATGTTTTAAATGGTGGAGGTGGATGGTAG
CATAATTTAAACGCTGTAAGTACACGAGGACTTGAAATGGTGCGTTTCTGTTTCAGGTAG
TTGCGTGAACCAATTTTGTTATCGAAGGCTAAATCTAAACGCTATTTTCTGTTGACGTTT
CTGAGTTTCTCGTGTCCAGCAGAGTGAAGTCCTCA
>NODE_17977_length_196_cov_8.801021
TCTGATATCATTGAAATAAGGGCAGCGCAGCAGGCAAGCCAAAATCAAACACTAAGCTGA
ATTTTGAAAAAACAAAGCTGCNATTTGTAATTATACGAAAGAGACACACAAAATCCGATT
GAATTCGATTTAAGAGCAAAGTCTCCATTTACGATTAAAGCTTTATATACACATATAATT
TTGACATAATCTATAACTTTTAATTTTAAAAGTTGTGCGTTTTTTT
>NODE_17978_length_64_cov_3.109375
TATAGGCTAGGGATAACAGGGTAATCTAAGCTGAATTTTGAAAAAACAAAGCTGCACCAA
GTCCACAGCGAGAAGATCGGAAGAGCGGTTCAGC
>NODE_17979_length_37_cov_268.297302
TTTCCTGTCGTATTCGAAAGCCATGACACCTCCAAGAAAACCCCGACAAGAGCTACCCCA
AATGCTG
>NODE_18020_length_132_cov_58.000000
CATTGTCACTGAAGTAGCCGAGGATGGAGTTGGTGTTGCCTTGAACTTCGGCGTCCCAGC
TCTGTGACATCGCATCACCGGCGTAGCCATTGTTGGTGCTCGAGTCGCCCAGGTTAAAGG
TCCAGCCCGAGGGATTCTCAAAGTCCAAGTCCAACACGAACC
>NODE_18023_length_58_cov_113.637932
TTTACACGAAATATTGCTACAACCCGAACACGGTCCTTGCTGCAGCTGTGTCGACAGTGT
TCAAAAGGCAACAGTTATTTTAAAAGAA
>NODE_18024_length_64_cov_94.343750
TGTACGCCAACAACAACCCGGCATTGAACCCAGGGCTGACCCGTTGTCCGGCCGGCACCG
TCGTGGGGTAGACGTCATCAGGGACCATTGTGTG
>NODE_18078_length_128_cov_3.335938
GGAAAAACTGAAACAGACCGAGTTGGACTGTGGGGATAATGTCAAGAAATATGAGAAAGA
AATTGCGGAAAGGAAAAATCAGGTGACTGCTCTGATTCAGGACAACACGAAACGTTTGAC
TCAGCTGGCATGGTTACTAACAGAACAAAACCAATACA
>NODE_18079_length_31_cov_3.741935
CATGGTTACTAACAGAACAAAACCAATACACAAAGTCTTTGGACAATCACCAGAAGAAAC
T
>NODE_18080_length_83_cov_4.048193
TGAGCAGGCGGCAGAATGTGACCTCCCTTTCTGGAGAGCAACATGATCTCCTCTTTCAGA
GCATCAATCTCCTGAGCTTGAAGTTGGACGAGCTGAATGAGTCGCTGCTTCTC
>NODE_18118_length_47_cov_57.914894
TCTTGGATTGCGTTGTTTCTGATTGGCTCAGTCGTGGTGGCTGCTGCTAACGCCGCCTAC
ATTCATTCCTGGTCCTG
>NODE_18119_length_205_cov_1.931707
AACCAGGGGACATCGAAAATGAGATGAATTGTCCTCAGATCGTGCAACGCTTTCCTAAGA
AATGTTATGATCCACGACTTTTTGAAACTTGCTGCAAGTCATGTATAGCTGTTTTCAAAA
TAGATTACATGAGTCAGAAATGTGACAAGAGATCTAAGAGAAACTCTTGCAACGTGTGTT
TACAACGTAAAAGCCCAATAGAAGGTTGCCAAGTGATCGACAACATTAGTACAGC
>NODE_18131_length_260_cov_1.415385
CTGTCAAGTGCTCTTTTACACAGCTTTCGGCTATGTGTACAAACTCCTGAAGAAATGAAA
TCATGCTATCTGCATTTTTTAGCCTCTGTTGAATAAGGTCAACCTTGTGTTGTATTTTAA
GGAGAAGTTTCCATTCACAACTAAACTGGGCATCACACAAACGTCCATTGCTAGGAATTT
TCAAATCTACTCTGTATGACTGACCCGAAACATTAATAAAACCAGAGTAATTGACAATTC
CATTTGTAAAGTTTAAGCCCAAAGGGATAGATCGGAAGAGCGTCGTGTAG
>NODE_18132_length_77_cov_1.025974
CGTTAATAGCCAGCACCATGTTTAATCCCTTTGGGCTTAAACTTTACAAATGGAAATGAC
AAGTCCACTAGTTTAAATAATGTTTCAGATCGGAAGAGCGGTTCAGC
>NODE_18133_length_594_cov_6.215488
CCTCTGTTTAAATGTTTTAATAAGTTTGCATAATATTGTTGTTTGTTTCTTTTTATTTCA
TTTTCACGATGTAAGCATTGGCTGATGTAGTCTCGGCAATATGGGGCGATGGATATACAC
CGCGTATTCCTAGAGTAATTGCTAAAGCCCGACTGACATCGTTGGATAGGTATAAAAACC
GATTGCGTGCGGGACAACACCATAATCCATTTGCCACCAAAATACAATTGGAGTTTGGTC
ACAGAGTCACCTTTCGGTAGCACTTGTAGTTCTTCATAAACAATGGGGAATGCCCAATGG
TTGACANGGCTAACGCACGCCCTGTTGTGGTATTAGGTAAACGGTGGTTTTATGTTAACC
TCAAACCAGTGTCTCAGTGGAAAGCCATCGTGAACATCAAGAAGTATTTGTTACCCCTTA
CGGGTTACCAACTGTTCGAACTATTCAGATGGCAGCAGCCACGGATTCTTTTACTGCAGT
ATGAAAAAGGGTAGCCTCCGTAGTTTTAATCTCAGTTGGTCATAGACACAGTTGGAGCTG
AAATGTAGCCCTTTCATCTTATATCCGAAAGGAGGTTAGCCAGCTTGGCAGAGACGGTAG
AACCCTACAAGGTACACTAATGGG
>NODE_18134_length_102_cov_77.950981
ACTAGTCCCAGTCATTCCATCACAATGAAAGCCGTGCTTGCCTTCGTCTGCCTGGCCCTG
ATGGTCTCAACCACCTCTGCTGCCCTCTGTACCGACACCTGCAAAAAGACATGCGAACTG
GGCAACCAGCTC
>NODE_18141_length_120_cov_78.366669
GGGAAGCAGATCAGAGCTCCACTGCTCCAGTTCTCCAATACCAATATCGAAGCGAGGAGA
GATGACTCCACACTTGTTGATGCGGCCATTGAGCTCAACAACAATCTTTCCACCACGCTT
GTCATCAACAAACTCGAACTCGTTGATGTA
>NODE_18213_length_36_cov_215.611115
TGGCAAACAGAGTCCCTGCAAGGTATGGGCAGTATGAACTCATGGGGACCGAAGGTACCG
AATGTG
>NODE_18217_length_40_cov_69.949997
AACCAAACGGATTTCACAGATATGCTATCAGTGCAGTAAAAGACACCCAGAAAGTTTCGT
TCAAGTTTAC
>NODE_18218_length_69_cov_67.724640
GGCCTGACCGTCATTGTTGGTGTCCATCACACAATCACGTCTCTTTAAAAAATATATATA
AAGGCCCCCGTTGAAATTCGTTTACTTGTTGGGTAGCCA
>NODE_18227_length_197_cov_71.766495
ATTGTTCGATGTCAGTTGAGCAGGTGTTCCTTGTGCTATCACTCTATTATACAATAGCTG
ATAGAATTCTGGGCCAAACCAATCAAGAAAGTCATCTCCCTTTATCCAGGCGCTACGTGC
TGGAGAGACATTTGTCATTGCCAACGTCCTGTGTCGTATGGGGATGGCACATAAATTCAC
TTCCAAATGCTTCGTATCGCAAGTTGTGTTGTCAGACACATGTGACG
>NODE_18242_length_68_cov_40.647060
GTGCATACCATCATCAGGTATGCTTGTCGATACTATATTATATTTACTTCGTGGCTATTT
CGAATCAATTTTACCATATATACACCGCTTAATTTACA
>NODE_18255_length_31_cov_10.419354
AAAACTGTGTCACCTGCCAACAGACAGCATAGCCTGTGAAAACTGTGTCACCTGCCAACA
G
>NODE_18257_length_31_cov_2.548387
AAAACTGTGTCACCTGCCAACAGACAGCATGGCCTGTGAAAACTGTGTCACCTGCCAACA
G
>NODE_18259_length_74_cov_72.297295
GATGAAGATGATGGGGACCATCAGGAGGGTGATGCTATAGGTCCAATGCCGTCTGAAATG
AACCAAGATGGAGAGGATGTTGTTCAAGCTGCTGAAGAATTTGA
>NODE_18260_length_80_cov_34.849998
AATGTTCGACTTTGAAGGCCAAAGTTTTTCCCCATTTCTGGAGGCAGTTCAGTCATCCAT
TCTTCTCGCTTACTTGGACCTTCTTCAGCTTCAACCTTAACAGTTAGTTT
>NODE_18271_length_37_cov_531.918945
ACATGAAGGGCAGCCGTTGGCAGCTGTGGCATAACCGTTAGATTACCCTGTTATCCCTAT
TTTTTTT
>NODE_18394_length_32_cov_65.031250
ATGAAGATGAAGAAGAAGATGATGATGAAGACACAGAGACTGATGAAGAGCAAACATCTA
GT
>NODE_18395_length_166_cov_1.518072
GGCCGCCGGAGGCAAGAAGCGAAAGAGCTCGCCGAAGAAGGCCAAGGCGGCCGCCAAGCC
CAGTGCATAAGGACACCCACCTCAGTCTACTCCATCACCAAATACAATCCTAATCATCAT
CAGCGTCCCAATAACAATGCACTTATCGTATCGCCCAGTCGACATAATCATCAGCGTATC
ATGCGTATGAGCCAGT
>NODE_18447_length_31_cov_11.387096
TAGCCACAACTCTCTTGATGAGCCACTGAGATGGGTCTTTGGGAGATATAAGCGAGACAA
C
>NODE_18484_length_41_cov_60.414635
TTTGACATTAATTATTTCCAAGTTCGCTTGTTCATGCTTGCGATGCCTGGGCAGGCCTTT
GAAAACGTCTA
>NODE_18490_length_177_cov_54.045197
TTTTCTTAATGGCATTAGTCAATGTTCCACGCTCACAGTATTCCAGCAATAAAAACAAAT
ATTGCTGCCGCTGCATGCCCACACGATACGCTGTAAACCAACGTTATTTGTCTTATTTAG
CGATGTCGACGACACGGATGTATCGATGCCAGGATCAGAAGAACTTCTTACGCCTCGTGA
GTCCGATAGTGAATTGACTTATCTGTC
>NODE_18500_length_178_cov_11.258427
GCCTTGTTCTGTTATCAGTCGCAGAGCTATACAACGGACAATGTTTCTCGTGTGTGTCGA
GTCTATCATACTCCCCCAGTTCGATGTGTTTCGTTAGTGATAACGATCGTCCNTGTACGC
GATAAGAACTCAGAACGTACTGGGTAGAGGTGAAAATTGTGCCGTTACTTAACAAGATAA
GAGTTAACCTAATGTATTGTCTCAAGTC
>NODE_18505_length_33_cov_1.000000
ATGAAACAATTTATGGCATCATTCTAAGGGGGCCCCCAGAAAATAAACAGCGATGTGAAG
TTA
>NODE_18509_length_31_cov_3.290323
ACAGAACCCGAGCTGAACACAAGTTCCTGTAAATGTAACACAAGTTCCTGTCAATGTAAC
A
>NODE_18522_length_40_cov_52.799999
CCGAATGGGCAGTAGACCGCACAGGCGAGCAGAATACAGGCGGGAATACGTTTAGTAAGG
ACAGGTTGAC
>NODE_18523_length_65_cov_1.846154
TCCACTTTTCCTGCAATATTCCCAGTCACCGTCTAGTGTTGTGCAACTGTCAACAAATAC
TCTCCAAGACAAAAGGTCGGCAAATGTCCAAACAT
>NODE_18550_length_178_cov_42.803371
CGGCTGTCCTGTTGGATCCTATAGGGACTACATCAAGTAGCCTCGACGAGACGATGAGGG
GGGCTGACAATCTGAGAGATGCAAACAGGACAAGACGCTATGCCTACGAGGATACCCACG
AATGGCCCAAGGACGGCTCTGTCGCGTATGATTTTGATGACGGTTCAGATAAAGAGTTAA
CTTTGTGGGACAAGCTGGGACAGAACTG
>NODE_18551_length_50_cov_84.260002
CTGTCCCAGCTTGTCCCACAAAGTTAACTCTTTATCTGAACCGTCATCAAAATCATACGC
GACAGAGCCGTCCTTGGGCC
>NODE_18552_length_69_cov_52.420288
AATCATACGCGACAGAGCCGTCCTTGGGCCATTCGTGGGTATCCTCGTAGGCATAGCGTC
TTGTCCTGTTTGCATCTCTCAGATTGTCAGCCCCCCTCA
>NODE_18567_length_55_cov_52.636364
GAGCAGTCAAGTGCATTCAGCAACAGCAGCTTCCAATTCTTCCTTCAGTTCAGCAGCTGT
GGCGTCCAGTTTCTCCCTGGCAAAA
>NODE_18621_length_65_cov_61.246155
GGATTTCAGCCTTAAGGGTCAGCTCACATGTGATTTCAAATTCACCACATTTTCATGTCG
GCAACGACGCCAACACCAACAAGATAATCAGGAAA
>NODE_18650_length_114_cov_39.192982
ATTTGAATCAATGTTACAAAGCAGATGGAGCATAATATCTTGTTAGCTACCAGTAGTGTG
GATATGTTCCAGTGAAGCAGAAATTTAATAGTAGTTGTTGTAACCCTTGCCGTAACCACC
GATTGGGAGAAGTAGGGCCTTTCC
>NODE_18651_length_37_cov_96.459457
ACCACCGATTGGGAGAAGTAGGGCCTTTCCGTAACCACCATAACCACCTCCATAACCACC
TCCGTAA
>NODE_18737_length_39_cov_62.487179
TGGTGTCTGCCGACATCAGTGACCCAGATGTTGTCATGTTGATCGATCGTAAGTCCATGA
GGCACATTG
>NODE_18738_length_172_cov_8.331395
CAACGCCATGCTGCCTTGGTCTGTCTGATGGTAGTCCTTGCCAGACAAATGTGTAGTTGG
CCTCAACCACTTTGCCGTTTTCAGCCAGCCGCGTCTCCTGTAGACATGCAATGTCGATGC
CGAGACGGGAAAGTTCCCTGTCAATGACCGCTGTCTTCCTTATATCTTCCGCACATGAGG
GGTCAGAGTTAAAACCAGTGCA
>NODE_18780_length_87_cov_11.770115
ATAATATCTCCATGGTATCGCTTGATGTCTGTTCAATGAGAGAAGTGAGGGCCACACATT
GTATTGACATTTGACGTTAACTATCCTTCCTGGTATAGACAGTTCTCCGAAAATTTG
>NODE_18787_length_62_cov_5.548387
TAATCTTCTCTCCCTATTTTTTTCATTCATATCAATCAATTCGTACAATACAATGCCTCG
TGCGGCTGGAGGAAAGAAAGCTGGCAAAGATC
>NODE_18788_length_447_cov_7.733781
AAATGACTAAGCTAACTAATAAGCTAAACACACAAGTTCACATGCCGTATGCAGCCCTAA
GCATCTACTATGCCCTACCCTCTACGTTTAAAGTTCACATGTTACGTTCTCGTTCCTTTT
CCCGTTTACGTCTTCCGTTTTTTGTTCGTCTTAGTGAGTCTCCCCTTATATAGGTATCCC
AAAGACAGCGCTAGAGCTTGTCCAGTCATGTCATGCTGATTACGTAATTGGTCAGGTCTG
GGCAGCCAATCCTGGCCATACAAGGTTGGCGCCNCCCACGTTTCGAACAGGTAAGTTATG
TTACCAAATGGTGTACGGGACCCCGTTAGCACCGCCTGATTTTAAAAGGCGTCAGAAATA
AACAGCCGGTGAGGGCCTGTATTTCACAGTGGACAGGCGTGGGCAGGTTGTTGGAACCCC
GTGTAACGGTGTATATATATAATTAATTTCATATTTGAAGAAACATCACATAAGAAC
>NODE_18820_length_39_cov_146.051285
CCAAAACTGTACCCCGAATCTTCATTGATGGCCAGTGTGTGGGTGGAAACAGTGACCTGA
AAAATCTCA
>NODE_18826_length_71_cov_51.366196
GAATATCTCATTTTTGTGTGTAAAAAATCAATTTTGAAAGTGCATTGAGGTACACTTTGG
TATTCCGGTGCTTATGGCATAATTTTGTCCAAAATCCTATG
>NODE_18832_length_295_cov_20.189831
CTGATCGAGTTTGTTTGATATATTTAAAATCGTTTTCTTAGTAAATAGAATGGCATAAAG
GAAAAAATGACTTTAAAAAAAAAACGAAGTAGAGCAATAACAGAAGCACTGTAATATCAC
ATGGATTTAAAGATCAGCACGTTTCTTGGTGCCTTCGGTGTAGAGTTGACCAACAGCAGA
CCAATCGATAATACGCCAGAAGTTATCAACGTATTCACTACGACGATTTTCATAGACTGG
ATAGTAGGCATGTTCCCAGAGATCAATACCCATAAGAACGATGTGATTTTTATCGAACAT
GATTGGGTTGTCTTGGTTAGCAGTG
>NODE_18833_length_331_cov_15.389729
GAAGCCATCGAGAAGAACTTCAGTTCATTCGATAAATTCAAGGAAATGTTCACCAATGCT
TCAGTCAATCTCTTCGGTTCCGGCTGGGTTTGGCTCTACATTGATGCTCATACCAAACAA
CTCGTTCTCAATTTCACTGCTAACCAAGACAACCCAATTATGTTCGATAAAAATCACATC
GTTCTTATGGGTATTGATCTCTGGGAACATGCCTACTATCCAGTCTATGAAAATCGTCGT
AGTGAATACGTTGATAACTTCTGGCGTATTATCAATTGGTCTGCTGTTGGTCAACTCTAC
ACCGAAGGCACCAAGAAACGTGCTGATCTTTAAATCCATAGATCGGAAGAGCGTCGTGTA
G
>NODE_18847_length_148_cov_121.229729
CCATCATTGGCATCATTGGTCCACCCGGTCCCATAGGTCCTCTTAAAGGACCCATTTGTC
CAGGCATGCCTGGTCCACCCATCATTGGTTTAGGAATATTGGGAGCACCAGGTGGGGGAA
TCATGACACCTCCAGGTCCTGGTATACCCGGACCGGAAAAGGGATTAGCACTGATTTT
>NODE_18849_length_61_cov_159.377045
TTTTCCAGCTTGGTATGCCGCAGTTGTGTCATCTACAAGCTTCTGTACCTGCTCCTCCAA
CCATTTTTGGTAATATAACCTTACATTTTCC
>NODE_18852_length_52_cov_157.076920
AACTGGAAGGTTTGATGACGTGGTCGGGACCAACGTTGAGTTCAAATGGGACACGATCCC
CTTGACCAAACGAGATCTCGAA
>NODE_18860_length_40_cov_97.400002
TGAAAACCTGGAATGACAGTGGCTCCCTGATGATTGCAGATGCCGTCAACACAAGCGTGT
ACTGTTGTGT
>NODE_18877_length_130_cov_140.992310
TCCTGACAGACCATCTGTCTCAGGTGGGTAGGGGATAGTCTTCTTGTTGAAGACTTTGGC
CTCCCAGTCGTTGTCACTGAGGTCGACCTCGGCCAGGACTGACAATGGAATGCTGTAGAT
CTTTTCCAACGTGTTGTCTACTGACCGTTTCCTAGGGAAC
>NODE_18878_length_44_cov_7.454545
TGGACTCGAATGCTTGGTCTATCCAGTAGAAGGATGAGATGGTGTCGATGACTATCATGG
CCACCTGGGGGTCA
>NODE_18879_length_195_cov_75.220512
TTTGTCGATTCCGAGGAGGGCAACCTGGGTTACTTAGACCGCAGCATATTCCACTGCTGG
TAGACGAATTAGTTAGGCGCTTAGGTGCTTGCCAGGTAGGCGATCAAGTCGGCTCTTTGC
TTGTCGTCTCCGATACCGGCAAAACTCATTCTGGTGCCTGCGACGTACTTGGCTGGGGCC
TTGATGAAAGCGAACAAGTGCTTCTCCGTCCAGACGATTCCTGAC
>NODE_18880_length_179_cov_35.804470
CAGGAGACAAGGCCGCCGGAAAGACCATCTTCGAGCAGCAATGCTCCAGTTGCCACGCCA
TCGAGCAGGGTGATGACAAGACCGCCGCCGCTCCATCCCTCGGAGGTGTTGTCGGTAGAA
ATGCCGGTAACGGTGCTTTCCCTTACTCCAACGCCATGAAGAAGTCAGGAATCGTCTGGA
CGGAGAAGCACTTGTTCGCTTTCATCAAG
>NODE_18881_length_40_cov_39.650002
AAAAAAGCATGGCATTTTAATGCCTGCAGATATCAGAAGTTGAGTAAAAAATCAATGTGC
AGCAATTTTT
>NODE_18926_length_65_cov_1.246154
AAAAAATAGGGATAACAGGGTAATAACTACTTGTCCTTTGTTTTGATAACTGGAGTGACT
TCTGATCATGACCAGTTCTGTTTAGTTTCATTATT
>NODE_18942_length_40_cov_87.525002
TCTCCTGTGTACAGCGTTGTGTATAGCAGCCGCTCTTGGCTACCCCGATTTCAAGTCGAA
GATCCCCAAC
>NODE_19010_length_40_cov_269.000000
CCAGATCAGTCTGGTCTTTGGAGCCTGTCCCCACATCATCACCAGGGCCCAGTGGGGGGC
TCGTGCCCCC
>NODE_19011_length_40_cov_158.149994
ACCAGGGCCCAGTGGGGGGCTCGTGCCCCCAAGAGTGTAACTCACCTGGCTGGACCGGTC
CATTACGCCT
>NODE_19014_length_296_cov_98.472977
CGCCCCTCAAACACTGAGCCGTCACCACCGATGACGTAGGTGTAGCCGATATCAGACCAA
CCATGTGTGTCCATGTGGTAGTTCTGAAAGCTCTTGACTTGTGCCTGGCATGAGGCCCTG
TCGTGACACTCTGCTCCAGCTGAATGATGGATGAAGGCGTAATGGACCGGTCCAGCCAGG
TGAGTTACACTCTTGGGGGCACGAGCCCCCCACTGGGCCCTGGTGATGATGTGGGGACAG
GCTCCAAAGACCAGACTGATCTGGAGACAGACAAAGACGGCGAGTATTCCTACAATCATC
TTGACAGATCGGAAGAGCGTCGTGTA
>NODE_19022_length_105_cov_1.409524
GCGATTCTTCCGATCTGTCGAGGACAAGATGCCGTACAGTTTGAGATTAAGATCAACCCC
GAGTCCGAGTACCAACTGTTCAGTATTGGTATGGGAAAAGCTCTGACATGTACCGTGTCT
GAAACACCTGATGGT
>NODE_19068_length_35_cov_80.514282
GATTTCTGCAGTGCTGATGTGGTCAATAAAGTCATTATGAAAAGTGAGTGTCTAAAGGAA
GTGTT
>NODE_19090_length_253_cov_2.683794
CAAGAAATGAATCTGAGTGACGACTGTAACTGTCCAGACGACACGTAACACGCAAGGCGT
CATGTCGTCGACCGTAACGTCACACCCCAGACGGCTGGTCATGTTGCTGACGTCTGCTTG
TCGTAAAAAACCTGTGATCTTTTCAGCTCTGGTTGGAGTCGTGCTATGTGTTCCAGCATT
AACCCTCCTCTACGGTCATTCCACGGGTCTCAGATATCGTGTTGCATTCGTCGACACACT
GTCTTCGTCTCCCATCTCAGGGTCACCACCATCCTCACCATCA
>NODE_19095_length_371_cov_19.743935
CTGTATTAACAAAGTAATGGGAGTTTTATGTACTACAGATATAACCCTTGACCGGCATGT
GATCTATGACAAGCAGACGTCCAGATATCATGGCGACTGCTTTTAGAACATTACATTTAA
GCCACGTCTTTAATAGACGCCCGTGATATACAACAACGTTATTGTAATTATTATTCCACT
GTCTATGATGTTAAGCCCCGAGCATGATCTAATAAAATGATTTCATCTATTAGATTATAA
TATCTCCTGTCATATAATATGTTGGCCTAATGCTAGCACAGCACCCCAAGCTGTAGGAAA
ANCACCGGCATTTGACTACATTAACATACACAGTAGGAGAATACAGTAGGTGACTACAGT
ATTTGGTTACAGTAGTTTACAATATTTGACTACAGTCACCG
>NODE_19096_length_138_cov_5.543478
CTGTATTAACAAAGTAATGGGAGTTTTATGAACTACAGATGGCCTTTGACCGCCATGTGA
TCTATGACAAGCAGACGTCGAGATATCATGGCGACTGCTTTTAGAACATTATATTTTAAG
CCTCGTCTTTAATAGACCCCCGTGATATACAACAACGTTATTGTAATT
>NODE_19098_length_33_cov_36.848484
TGTTTGTCCTCAGTTTTCCTACAGCTTGGGGTGCTGTGCTAGCATTAGGCCAACATATTA
TAT
>NODE_19163_length_53_cov_76.452827
TACTTGGTGATTATGAACACTTCAAAAGTATCACATAATTTTGTCGGTCCTACAGCAGAT
AGCTGCATCTATGATGCTTATTG
>NODE_19164_length_224_cov_9.906250
AACGCCGGCGATTCCTGCTTGACGAGAGTGATAACTGCCACTGATATGAACTTTGCATGC
CCCTGTGCCTCTGGCTTGTCCTGTAAAGGATTGGGTCTTTTCGAAATACCATTGGGCGAA
AGAGGTGTATGCTCCTAAAATCCATAAAATGCTTCCAATAAGCATCATAGATGCAGCTAT
CTGCTGTAGGACCGACAAAATTATGTGATACTTTTGAAGTGTTCAAGATCGGATGAGCGT
CGTGTAGGGAAAGA
>NODE_19214_length_73_cov_2.054795
CGCAAACCTCTCTTCGCAGCCATATTGGAGTGGTGCCTCAAGATACGGTTTTATTTAACA
ATGATATCAGGTACAACATTCGCTATGGTAGACTTGGGGCAAC
>NODE_19215_length_35_cov_53.742859
AAATAGGGATAACAGGGTAATCTTTACCTTTTATTTCTATAACTTTTACAGCAGGTCACT
TACCG
>NODE_19282_length_126_cov_94.380951
GACGTCATCACACTGAAAGTTTTGGCCAGATTTCAAGTCGTCATTTGGAAGCACACCATG
ATTGTAGTGGCTCCAAAGAGTTGTCCAGTTGGATGTCAAGGTCCCTGGCATGTATCGCAT
CCAATTGTATTTAATGTGGCGTAAATGTCATATGTC
>NODE_19283_length_58_cov_7.931035
AGTCTGAGTGGAAGAAAGTGGTGAGACCAATATTTGAGGGGGAAAAATCAACTAACTAAG
TCTGAGTGGAAGAAAGTGGTGAGACCAA
>NODE_19284_length_121_cov_24.322313
TTGTCAGTATATTATAGATGATGTAAAAAATTTAGCTGTCAGGCATGTATAGATGTTGAT
AAAACTAGAACAATAATTTACTTCATGTATTAGAATGTTACAATTGACATTTCAGTAAAT
TACAGGTCAAGCCCATATAACATGACAGGTC
>NODE_19285_length_31_cov_33.000000
ATGTTATCTGGGCTTGACCTGTCATGTTATATGGGCTTGACCTGTCATGTTATCTGGGCT
T
>NODE_19318_length_31_cov_4.258065
ATCAGGCAGGTGCACCACAACCACATCAGGTAGGTGCACCACAACCACATCAGGCAGGTG
C
>NODE_19340_length_31_cov_138.161285
TTTGATCTTGAAAGTTACGTGGAGACCCGAGATAAAATACCTATTTCAGCGAAATCTTTG
A
>NODE_19360_length_36_cov_147.750000
CCACTTACAACAGAAGAAGTTGTCGTTGTCACAAGAGACGTTGACGACATGAAGACACGC
CACGGC
>NODE_19362_length_38_cov_6.526316
GACACCCAATCAGCTTGTACGAAACTCTGTGGGTATTGAACGAAGATGATGAGATAAATT
GACAGAAC
>NODE_19369_length_62_cov_64.161293
ATCAATACACCTGGACTGGTCAGCACACTGGAACTGGCTGGCAAAACAGGAGGTACAGTT
GGCCTCGTCATAACCAGTACCACAATCGTTGT
>NODE_19370_length_88_cov_130.102280
CTGGTGAGCACGAACTGTTATGTAACAACGGTCAGTGTGTCCCCAGGGAGTTTACGTGTG
ATGGTGACAATGACTGTGGGGATATGACGGATGAGACCGACTGTCATAAAATAAGTTG
>NODE_19373_length_53_cov_84.490562
GAGGTTCATGAGCCTCTTCCTCTTCTTCCTCAGCTGGAGGCTGAGTCACAGTTGGCAGTC
CATCAGCAGCTGAGCCACTGTCT
>NODE_19458_length_147_cov_68.061226
GGAGATGATACTGAACAAAGACCAGTACCCTCAAAGAGACTGCTGACCTTCTTATCTCTG
TTCAACGGTTACTTCAGCAGTGCCAAGGAGGTGGAGTTGGAAAAGGTCTACCTGGGATAT
CCTGATCATGACGTCATCAACGCGACCTTTAGGAACGTCTTTGTGCCAGCACTTGCT
>NODE_19466_length_51_cov_12.901960
TTGAGACCTTCCTCCTCTAGCTGTTTACATGGAGTCAAAGGATTAGTCCTTGATGTGAAA
CTAAAGACGTTATTTGGCAGA
>NODE_19486_length_96_cov_75.812500
CCCCCCTCTCCATTCTACGCATTTGGTTTCTGGGTGGTCGGAGTTTGAAGAGGCTTATCA
CATTTGGAACTATATTTATCGAATATATTTAGAAACTTTTAGGCTGAAATGATGCTCAAG
TGACGA
>NODE_19491_length_59_cov_261.491516
TTTGCAGTGCGAGTCCTGCTTTTAATTACAACAGGTTTCTGGCTTTTAAGAATAGCACAT
GTCCTCCTAACAGCAGAGTTAACCAAGTC
>NODE_19524_length_47_cov_45.851063
AAGTGATGATTCCAAATTGCAGTGAGTGAATGAGATACCAATAGTTGTTCAAGGTCCCAT
ATCAACTTGTCATTGAG
>NODE_19536_length_41_cov_14.219512
AAATGGTTGAGGAAATGGAAAACAAAATTCGCAGCACACTGAACAACATTTATTTTGGCA
AAACCAAAGAC
>NODE_19550_length_181_cov_17.359116
GACAACCCCTGGTTGTTGATGACACCGGAAATGGTGGCGTTGTCGTGGACGACGTTGTTG
ACGATGCCGGAAAATGTGTTGACGGAGGCGATCTCCTGGTAGTTGATGATTGCTGTGTCC
TGCGAGCGGTAAACGAAGAGCGAGACGAGACTGGACATCTCAAGGTCGGTTCCATGGTTG
AAAGAACAGTTGAGATTGAACTGTGGTGTAA
>NODE_19565_length_36_cov_261.000000
TTAAAGATGCACCTGATGTAGGTATTCGCCTCCTGACAGTGGAGTGCGAAGTTGATGCCG
TGACGT
>NODE_19604_length_61_cov_172.639343
TTTTCAAGATAGGACTTACAGAATGCCATACGAACGATTTGTTGAGATAGGCCGTGTGGC
TTTTGTTGCTCACGGAGATGACAAGGGCAAA
>NODE_19607_length_71_cov_1.619718
CGACAGTGTACAGTACTAAAGGCAAATTAAATATCGTCGATCCATTCAAAACACATCCGT
TACAACCAGAACCGACGCCTGGTCAATTAGCTGAAGCAGCT
>NODE_19686_length_145_cov_34.110344
CCCGTAGCCATTTTGGACGGCATAACAGGCCTTTTCCTTGACACTCTGTTGGTTGTCATA
ACCGATCCAGTTACTTCCCTGCAGGATGTAGGGGTTACGCTGAGAGTTGTCAAAAGTCAC
ATGACCGCCCGCTCTGATTATGTCACAAATCTCGAGATCGGAAGAGCGTCGTGTA
>NODE_19687_length_48_cov_118.416664
TTCACAACACCATCAGCAACTAATATGAAGACTTTACTCGTGGTCTTTGCCGTCATGCTG
GGAGTCGCGGCCGCACAG
>NODE_19732_length_31_cov_36.225807
TCAACTTCTGACTTGCAAACATCAGTCAAAGAGTTACGCAATGATTCTCAGAACTGATTG
A
>NODE_19784_length_73_cov_1.315068
AACCTCTTGATGAGCTGGAGCTTTTAGCCCCATTTAAAGGAGAACATGCAGGAATTCCCA
AGGAAAAATTGGATGATTTTCAATCGAGGGCAAAGGACTTGAT
>NODE_19853_length_59_cov_168.423721
ATGACTTCTGGTCAACTTGGAGATGGTGTAGGAAAGGGTGGTGGCAGCGGAGGAGCTGTG
TGTGAATAGTTACTCTAGATTAAATTGTG
>NODE_19854_length_275_cov_15.800000
TTGAATGATTAAAAAAATATAAATACAGTTGTTTTTTTTTTTACAAGGCTTTGTTTAATG
ATTCCATAGAAACCGTTTCTGTTCCTTAGCAAATAATTCTGTCAGNAGTTCCTTCTCTCA
CGATATAGGTTGGTAAAGACAAGAACAAGGACGTTCGAAAGTCGTGAAACTGGTAATAGA
ACGAGACCAAGACCGGAACGACAATAACCGTGGACTTATAGGAGAAACCCATCAACTAGT
CTGGAGGTAAAGAGTAGATAGTATAGGTAATTTGCAGGTAGTGCAACTATGAGTGATAGG
TAAAT
>NODE_19880_length_200_cov_30.059999
AAAACATTACGCAGTTTCAGACTGTTTCCTGACGTCAATGCCACCGCGCCGTTGTTCGCC
ATCTACGCCGGGCTGGACAAAGGGGGTCGTATCAAAATTGGGGATCCCGTGTACGCTGTC
AGGGGTGACGGACTGGGGATCAAAATCAGCCCGGGTATTTGATGCNTACACCTGAGACAA
TCACATAATTTGGTCTTAAAATTGCCTTTTTTTTTTTTTTTTTTATCCCT
>NODE_19885_length_50_cov_63.820000
TGTCTGTTGTTGTTGTTGTTATTGTTGTTGGTGGTGAAGGGCCATTTCCCAAGGTCAGGG
TTGCCGTTGATGTCAACCTG
>NODE_19886_length_128_cov_7.546875
TGAAACTTTTCTTCCATCTTCTGTGTACATCAAGGTCTTGAAACAAATACGACAGAGAAA
TGTTGGGTCTGTTGGTAAGAGATCAGAGTCCCGTACAATCCATTTGGCAGATAGTTTACT
ACAACCCTGGCATATTACCCAGATCGGAAGAGCGTCGT
>NODE_19890_length_31_cov_2.258065
CTCTGTTGATGCTGTTGGTGCCTTGGCAGGGAAAGGGGAGTTGACTGCATCTGGGATAAA
G
>NODE_19931_length_116_cov_91.922417
TATCCCTATTTTTTATTTTTTTTTTTGCATTTTAAAATATTTATTTTGTTTAAATTTTGC
TCTCGACTTCAGTGGAGGACCTTTACTTAAAAGATAGAAGGGACCAAGGCACCCTGTCAG
CGTGACACAACCAGCCCTCGGCATCA
>NODE_19937_length_115_cov_34.295650
AAAAGAAGAAGAAGGCAGGCAAGTCCATGGTAGAAAATGCAGCAGAAGCTGAGGAAGAAG
ATTGAGCAATCACAGGTTGACTTTTGATTGGCTAACTTGAGGGGTTCTGGTGATGATGAT
GCCGAGGGCTGGTTGTGTCACGCTG
>NODE_19942_length_46_cov_27.739130
TCTCTTCTAGTAACTTCTGCTTGGCCTCTTCCGTTAATTCAATGTTTTTTATCTTTGCAT
CAATGCCAAGGTCAAT
>NODE_20012_length_220_cov_57.259090
CGGCTGTTACTACCTGGCCGTAAATATTTGTTCTGATTTGTGAGTTGCCAGCTAACGTGG
GAACAAGTTGGTCATTCTTGATGCTACTGGCAGGTGCAAGGCTGGGAACCACGTGGAACT
TAAGAACCTCTTGGAGTAAAGTTTTGTTCGATGTTAGGGCCTGGACCAAGGACGCAGGCA
AGCTGGACACGGCTGCTTCAGATGGCGCAAATAATGTGATGTCCTTTGCTGTGTCCAAGG
CGGATTTCAG
>NODE_20068_length_31_cov_57.516129
CGTATAATTTTAGTTTTATCCATGACATACGCCGTGACACGGGCTTTTCTTGTTGAGACT
A
>NODE_20070_length_65_cov_68.153847
GGGCTTTTCTTGTTGAGACTACTTTGTCTGAGACATCGTGTCAAGGCCGCTGTGGTGCTG
CTGTCGACTCCACCAAACCATGTCAGTGTAACTCT
>NODE_20071_length_42_cov_8.761905
AAAATAGGGATAACAGGGTAATTTTCTCTTGCTGGAAAACAAACCCTGTAATTACAGCAT
TCATGCAGAAAA
>NODE_20072_length_40_cov_14.075000
ACCCTGTAATTACAGCATTCATGCAGAAAATGGGTTATGGCTTAGATTATTCAAAACTAG
AAGAATATTA
>NODE_20074_length_197_cov_6.862944
AACAACTTGACAACAAAGTTTTCAGCCCCAACCCCGTGACTTTAGCCATTTCTGCTTGCC
ATCCGCCTTTCCATACATTAACCACTGTGTCCGGTGCAACCTTTGCACCATTATCAATCA
CTTCCTGCCAGATCATGTAACCTTTCTTCAAGGAAGAAATAATATCCAAGAGGTTTTGCA
TGTAATATTCTTCTAGTTTTGAATAATCTAAGCCATAACCCATTTTC
>NODE_20075_length_31_cov_5.806452
CTTTCCATACATTAACCACTGTGTCTGGTGCAACCTTTGCACCATTATCAATCACTTCCT
G
>NODE_20078_length_52_cov_60.000000
CAGACATCGCTTCCGCAAAGGAAATAAAAATGAAAATGCATCACTGCAACTGCAAGTCGA
CTTATGCTCCGTAATTTTTAAA
>NODE_20089_length_127_cov_10.259843
TAACAGGGTAATACATCGCTTCGATCGTTCTAAGAAATCTTCTCTCTACGACCTCAGCTA
AGAATCTCAAGCAACATGTTCGCTAAAATCTTACTTCTCGTTGCTCTCCTCGTCGCCGTT
CTGGCCACGGTCTCGGATGCCTACTACTTCCGTCGTC
>NODE_20094_length_31_cov_163.129028
AACAGCTCGGTTTGACTATGGGGATTGTTTCGGCTCAATTGGTACTTGCAACACTTTTGA
C
>NODE_20103_length_45_cov_116.266670
CCACCTAGGCCTCCAAGCCCGCCAAGGCCTCCAAGTCCACCGAGGCCCCATCCGAGTCCT
CCGAGACCGCCAATT
>NODE_20116_length_92_cov_7.902174
GCTGTCTCTCATTCACAAACATTAAAGCTGTTACTCTCGTCCTCAAACTTTTAATAAATG
AATCTTATACTTTTCTCAGAAGGACTGAGTGGACGACCAGTAAAATTGTTTAGTCTCGTT
GA
>NODE_20121_length_73_cov_134.616440
TGCGTGAATTAATGTGAATTGCAGAACACATTGAACATCGATATCTTGAACGCATATGGC
GGCCTCGGGTCAATCCCGGGGCCACGCCCGTCTGAGGGTCGGC
>NODE_20122_length_34_cov_17.617647
CCTTGATAGCTCCCTGACGTAGGGTTGCACTGACTCGATTTGTTGTCATTGTTTGCTTTC
GCTT
>NODE_20123_length_89_cov_4.898876
GTCATTGTTTGCTTTCGCTTGCTGATCACCGTGGCCGGACATCACGTCTTGCTAGTGAAC
TGAATTGTTAAAGCAAAAAATATATTAACATATATTACCCAGATCGGAAGAGCGTCGTG
>NODE_20149_length_92_cov_20.467392
CATCCTCCATTTCCAACATTGCTGGAGTGTCTTCATCATTGATTGGATTCCCATCAAATC
TGAATCTTACAACACCTGTTTGAATACCCGCTCTGTTGCAATATGCACCCATTAATTTTC
GA
>NODE_20158_length_147_cov_55.823128
ACCATCGGATCTTACTCAGGCAGCCAATTACTCACTGGAACTGGAACCGGAACTAAAGCC
ACAACTGGCACCGGTGGAGGCAGCCCATTTGGCAGCTCATCATCAGTAGGCGGTGGCCTT
TTCTAAGTCAAGTAACCATAGCAACCATCGTTATCATCAGGAAGTTACTTAAAAAAT
>NODE_20169_length_38_cov_39.026318
CCAATCCGAGGCGCCCTTGACAGCAACTATCCTGAAAACGTGACGCTCATTAACAACAAG
TGTCCAGC
>NODE_20170_length_38_cov_49.763157
AGTCCAGTTATTTTGTCACCAACGGTACGTCTCTTTCGTCCAGCTCCATTGGAAAGACAG
GATCTGTC
>NODE_20174_length_35_cov_19.485714
AAAGACAGGATCTGTCGCACTGGGGCTTAGCGTCCGTCGCTAAACACACACGCAGGTGAC
ATGTG
>NODE_20177_length_63_cov_1.222222
ATTTTATGTCACTGCCGCTTGCGTTTAATTCTTTCTTCGCAATATGCCGTCAATTCAACA
GGGAAATATTTAGATCGGAAGAGCGGTTCAGCA
>NODE_20182_length_95_cov_57.294735
GGTGGTCGTTGTGACAGCAGGCGTTGTTCGGTTTGGGACAAGCTTCTTGGCAAAACAAGT
GGTTGTTGTTGCTGCAAGTGATCTCACCATGGTCATGGCAATGGCAGTGACCGGATGGGA
CGTCA
>NODE_20255_length_156_cov_13.967949
TTTGAGGGACGTGGAACAGGAGCCTCTGAACCTGTTGTTACTGGTTCTTTAAAGCCAGGA
AATTGAAAACCATCATACGTCATTTGTCAATCAAATGACCTAGATTTGTCTTTTTCGGAA
TGCAGGGACTTCAATTAAAATCATGTTCCTCTGATACCAAAATTTGAGATCGGAAGAGCG
TCGTGT
>NODE_20257_length_101_cov_45.287128
CATCAGACCAGCTGGCCACAGACCCTCCACAACATCCACAGTCTCCACTACCTGTGCTCA
CAGTTCCACCAATGACGGAGAGGACAGTCCAATAGTCAGCTGTGATGATGGCAGCTTCGG
TAAAGGTGGGA
>NODE_20292_length_31_cov_33.548386
TGGATTCCAGGTGGCGTTCTAGTTCTTCTCTAGTCATTTGGCCAGGAGATTCAAGCTTAA
C
>NODE_20294_length_112_cov_12.937500
GGGTAATAATATTGACATCAGATCTTGCAACGAACCACTTCAAAAAGAAGAGATTTCTAT
TAAAGAACGAACGAATAACAACAAATACGTTGTGAAATCAAACATGGCTAAATGGGTTGC
TGTTTTCTTGATCGTCTGCCTG
>NODE_20322_length_37_cov_154.891891
GCCAACTACCGCAAAGAACTTCAGTTTTTATCTGACTTCACCTCAAGGTTCAATGTTGGT
GCCAGTG
>NODE_20323_length_87_cov_106.712646
TCACCTCAAGGTTCAATGTTGGTGCCAGTGGCGTCCTCTTTGGAGCCGTACAATACAGCA
ACATCGCTCAGAAGCTGTTTGACCTCGGCACAAATCCTTTGAAAGCTTCTCTCGCTA
>NODE_20329_length_241_cov_58.058090
GTCATCGCCGTACGACAGCCGCCATTACAGTTTCCATAACAACGGCTCAACACTCGTCAT
CAACGCCATAGACAAACCCGACTTCGGCTGGTACCACTGCCTGGTGCTCACCCACCCCTT
CTCTGTGCACGCCACCGTCCGCCTGGGCGTCAACGTCAACGGACCCTACTTCGGCGACCT
CCTGGAGAAGTATTCCTCGAACATGAAGACGGGACTAGCCGCAGGGGGCGTGGTGTTCAT
CGTCATGGCCATGTTCTGTTTTAACTACGAC
>NODE_20330_length_63_cov_56.111111
TCATTCCGATGCAAGCGATCTTGCCTGCAATGTCTGGTCTCAAAGCGAGCTCAGGGCTTC
CGAGTAGGTCAACACCCAACAGTTTGCCGAACT
>NODE_20338_length_46_cov_86.630432
GCATGTGCTGAACTGACTACTAGTGTGAACCAACTCGCCTACGTATTGTCAACCGCTATC
GGAGAGTCTTCGCTCA
>NODE_20339_length_95_cov_62.789474
TGTCAACCGCTATCGGAGAGTCTTCGCTCAAGCCAATCAAAGAGATCAGGGCCAGGGAAG
GCACTTCTCTCTACAAAACCCAGAACAAGTACTGGGATAGCAGATCGGAAGAGCGGTTCA
GCAGG
>NODE_20350_length_223_cov_101.677132
CTATAAATTTCATTACCTTGATTCTTTCATTGTATACATGCTCACAACTAGCTACTATAA
ATGCCTTTGTACCAGAAGAAGAGTGGGACTACCTTGTGTTAGCTCAGTTCTGGCCATCTT
CGTCCTGTGTTTATTTTAAAGAGCCAGATTGTGTGCCACCACAGATTCACAACTGGACTA
TACATGGCTTGTGGCCTTCTCTCCGTGGAGCATCAAAGCAGCCTGAAAACTGTAACAAGT
CAATGCCTTTCAA
>NODE_20352_length_70_cov_83.628571
GTAGGCACATGTCCCATGTTTCTCCCACTCATGATCCCAGAGATATTGCCTGTCTTTAGA
AGCCTTGTCATAATATGGCCAATATAAGTCTAAGTCAGGT
>NODE_20353_length_119_cov_64.731094
GCAACAGTGATAGTACTGGTTGAATCTCACGGAATTCTCTTGTCTACTAGATTGTGCTGT
GATTGAAAATGGAACGAGGTTTTGGTAAAACTAGTAAAAGGAAGCGGGCAGAGAAACCTG
TCCCCTCCTCATCTGTCAAGCAGGAAAAA
>NODE_20355_length_45_cov_61.977779
AATTGTTCATTGATGAGGTCTATGATTACTTTAAAATCGCTGTATGACCAGTTATGTGTA
TTTCGCCACATGGTC
>NODE_20356_length_116_cov_31.172413
GACCAGTTATGTGTATTTCGCCACATGGTCCGAATCACTTCCGCAGCCTCATCATCAACA
TTTGGGGGAGCATAGGCTTCAAAGTAATCATCTTTTTCCTGCTTGACAGATGAGGAGGGG
ACAGGTTTCTCTGCCCGCTTCCTTTT
>NODE_20359_length_31_cov_219.580643
ACAAAGGATAAACGTCAACAAAATGATACCTGTCCAGTATGTCTTGAAGAGTTCACTACA
G
>NODE_20371_length_40_cov_115.550003
AAAGAGCAGAAGTTCTCTGCACTTGATCTAGGCACAAGTTCAATGCTTGAAAAGAATTTA
CGACAGCTGA
>NODE_20372_length_35_cov_17.828571
CAATGCTTGAAAAGAATTTACGACAGCTGATGGAATGTGTAGATCGGAAGAGCGGTTCAG
CAGGA
>NODE_20387_length_117_cov_1.350427
GTTAACACAAACAGTGTGTTTAACTTTGCGTCTAGGTATCAATTACACGCTAACAGTGTC
TGGAAAATAAGACATGACGTCATTTCTTGTGGAATCGACATTCGGAGACTATAAATCTTG
GAGTTTACATCGATCTCTCGGGGAAGG
>NODE_20413_length_101_cov_45.198021
GCTGCGTGGTAGAGTTGCGTGGTAATGTGATCTTCAACCATTCACGTGGGTGGTGTGGGT
GGTCGCCGACCGATGAAGTCGACATTAGTGAGATCGTCCCAGACACAAAATGGATTGTGG
AAGGAATTTGT
>NODE_20425_length_36_cov_72.194443
TTTTTTGTATTGCTACACGACCCATGCTGGTAGTTCCACCATTTTCAGGGTAGTATCTCC
AGGCTT
>NODE_20426_length_51_cov_114.411766
CACCATTTTCAGGGTAGTATCTCCAGGCTTCATTTCTTATCCATGGGTCTTTCAAACCAA
GGGCAGAAAGTCTAGTTTGAA
>NODE_20430_length_53_cov_164.471695
CATAGCGTTCCTGACTGGAAAATTTACAAAGCAGAAGGAATTCCCGAGCTTGAGCGTCTT
CAAACTAGACTTTCTGCCCTTGG
>NODE_20431_length_71_cov_1.056338
CTCCTCTATTTATTTTTGTGATGTCATAATTTTTTTTCACTCTGTTTTTGTTTTCTGTCG
GATTTTTCCGTTCTATCCTTTGTATTGTGTCCCATATTTCA
>NODE_20432_length_142_cov_67.683098
CCACTCTGACATGCCCCTGTTCAATAAAAGTTGTAGCAGCTTTCAGAGTCTCTGCCATGT
GGTTCCTCACCATTAGAACTGGCAGCCTCCGCCTGCAGAAGGACGATGCCATGACTCTGT
CGGCCAGCTTCAGACTTCGTTTGGTTGGAATCAGCCCCATGTTGAAAAGTTT
>NODE_20434_length_65_cov_31.707693
TTTTTCCAGCAAGTTGTGTGTGAACTCTATTCGCCTCGGGTGATTCTGGTCCATCTCTTT
GATCTGCCTGGCCATCAACTGGTGAACTGTTATTG
>NODE_20445_length_90_cov_1.766667
TTTTAAAACATTTATTGACTGGAGTATAAAAACAACTCATATCTAAACATAAAACCGAAC
AGCACATATTTACATACAGATCACTTACTTTAAACCAACAGATCGGAAGAGCGTCGTGTA
>NODE_20446_length_146_cov_1.363014
TTTGTTTTTAAATTTTGGCAACTATAATTTAACATCATACTTGTATATTTGTTAAGGGAA
TTTCCATGTTAATGAAATAGTTACATTTATTTTTAAAGCTGTGAATAGAATTTATGTTAT
TTAATTAAAATATAATTCAGCTTAAAAAAATGATGTTACTTGTCTCTTGGTGAAGT
>NODE_20475_length_31_cov_50.774193
ACAATCTCCATGTCGAAAGTTATGGTTATCGCAATGCCATTGGCATGTCGCTGTGACATT
T
>NODE_20484_length_74_cov_46.959461
TACGTCCTGAACGAAGTCGCCACGGACTATAACTCCGGGTTCCACGGAGCTCTGGCGGCC
ATCGAGCATCTGCAAGCCACAAACAACTTCCCGGTGACCCACAA
>NODE_20485_length_211_cov_2.199052
GGTGTCATGCCTGTCTGTACGACAATGATGGCTCTCATAATGTTTTCTTCCTACATTCTA
AAGCAATAGGTCTTGATTGTTTTAATTCCGACTTTGCTCTCATCAGGGAAAAACACAAAC
ATCTGATCAGTTGGGTCATCATTATGTGCTACTAGTACAATCAAATCACTGCGACTGGGT
TTCCTTTCACTTGGTTTGTCACCAAACTGTGCTTTGAAACCATCCAGGGTTTGGTCCAAC
T
>NODE_20490_length_70_cov_8.028571
TATGGCGTCACACAACCCGACGAAAGGTTACTCTCATTCTTCATACCAAAGACCAGGTGA
ACATCCAAGTCATGGTCACGTGCCCGGTAACAAGCCTCCA
>NODE_20500_length_37_cov_40.810810
CATAAATGTCATTTTTCCTTCTAGATTCTCTGTATATTCACAGTACCAAATTGAGTAATT
CTCGCGA
>NODE_20504_length_31_cov_32.741936
AAAAGCAACCCCTAAGCCTCAACCTGCAGCTGAAGAAGAGGATGAAGAACCCAAATCGGA
A
>NODE_20505_length_116_cov_70.318962
AAGGCGAGTGGCAGGGGATAGCTGCTGAGGGTACCCCGGCCATCTGGACCACCAACGACG
TCCTAAGTCCTGCCTACAACCCTATGAACACCTACGGACCCCACTTCTGGCTGGTTGACA
TTGAGGTGGACTGCGGCAATGTCTTG
>NODE_20507_length_48_cov_40.395832
CCCGCCCCCCTTATATCCCGAGAGCGCCACCTACAGTGCCTCCACGCTACATTTGGTTTA
CTTATCTTAAGTGAATGA
>NODE_20626_length_195_cov_2.846154
GTGGCCACCCCACACGGCACAACACCAAGGGGCTTACCCAATATCAACCCACAGAGGGGA
TACGGACCATTTGGTGCAGGAGTTCCTTACCAGCCTGCTGTCACCCCCGTCATGACACCC
ATGCTCACACCATCCTCCTCGTACCAGCACATCGCCACCCCTAGGACCCATGTGGGGAAC
ACCCCATCTTACCAGCCCACACCTCGCCCGGCAGTGGGACCGGGT
>NODE_20666_length_378_cov_11.650794
AAGAACCCAGTCTCAGAGAGCGTGAACGCTTGCACTACAACATGCCAATTTCAGCTATGT
GACATCTCGCGCGTCAGGTCAGCACACCTAGTGACATCTGTAACAATCTACCTTTTGACA
TCTGGAACTTTAACAACCTGCTGCCTTGTGACATCTGGCATTTGTAACATGAAATGATGA
AGTTGTAAAACATTTTNCGGAACACTGTAGACCGTAAACATTGTACTTTACTACTTCAAC
ATTTTGTAAAAAAATTTTTAGTCGAAAGGAGTTATGGTTATGACGTCGACACATTGATCA
CCGGCGATACTGCGGCAACCACACTCTTATAATACGTTTAGGTTGTTTATTTAGTATTTC
ATTTCTTTTAAATTCATTTATCTTTGTTTTTTTATTTTTTTTTATCCC
>NODE_20667_length_47_cov_76.085106
GACTAAGGGCCTCAAGTACTTTGGTACGAAGGACAACATCAGATAGCAACTAAACCAGGT
GATGAAACAACGGCTGA
>NODE_20723_length_38_cov_25.052631
GGCCATGTAGGGGCTCATTTTGCTATCACGTCGGTACAGGGAAAATAGTGCACCGGTCCG
TGGAGCAA
>NODE_20727_length_89_cov_31.483147
TATCCCTATTTTTTTTTTTTTTTTTTTCACTGTTGTGGGTTGAATCCCAATATTTATTGA
GCTGTACACAGAAAAGTAACAAAAATAAAACTACAATCAGTATCTGATGCATGCATTTC
>NODE_20728_length_43_cov_57.581394
GACCACAATGAGGACAGTGACAAAGAAGGCAGTGAGAAAGCAGCAGACAGTGATGATGAG
CAAGAGAATTCCC
>NODE_20747_length_42_cov_1.095238
TTCTACCAGCTGATGGATGGTGACGGCAACAAATTGATCAGACACTTCGAATATGTCCGT
TATTGGTCTATT
>NODE_20856_length_73_cov_3.205479
CGAATGTTTTAGTGCCAGTCTTAGGATTAGGAACAGAAATACATGTGTCTGCAGGAGAGC
GTTGCAGAAAATAAAGTCAAGTTCCCATGATCTCACCATGACG
>NODE_20918_length_189_cov_99.174606
GGAGTTCAATATCAGTTTACTGATACACACTGCGAAAAATCAAGTGTAGGCTCCATGCAG
AGGCAGTGTATCCCGGATAACGCAATTAAAGAGAACAGTGGATTTTTCGGCAACAACCAA
ACCAAGGTCGTGACCTTTCAGTTCACACTTTCCGGCACCAAGCTGACCTACCTGGTCACT
ATTGACCCGTCCATGTGTAAGATCGGAAGAGCGTCGTGT
>NODE_20952_length_86_cov_10.279070
ATGAAGTGAAAAATCTCCTGTACATGTTTTTTGGTGGCAACATTGCAATCATACTATGGA
AATGTTCTTGATTGCCTAGCTTTTTCGTTAATGAGATCGGAAGAGCGGTTCAGCAG
>NODE_20972_length_46_cov_68.652176
ATCAGACTGATGGCTGTCAAACGTACGTCAGATGTTTAGGAGAGTCTGTCGTTGGTCAAG
TTTACTGTCCGGCAAA
>NODE_20983_length_31_cov_44.645161
TAAAACATAAACTCACCAGCTGGACTATCTGCAGAGGACAAGACAGGTTCTATAGAGAAA
T
>NODE_21049_length_34_cov_42.941177
CATCAGCACCAGATAATAGTGCGATGCGCTTTATTTAAACCATGGCGAGGGCAGCTATTT
TCTT
>NODE_21106_length_118_cov_79.059319
AAAAAAGATTACAGATGCCTTTGACATTTTTGACCATGAATCAAATAAAACTGTGGATGT
CAGGGAGGTGGGAACAATTATTCGGTCTCTCAACTGTTGTCCAAGTGAAGCAGAACTCCA
TGACATGCTAGCAGAGATTGAGGAAGAA
>NODE_21108_length_497_cov_31.939638
TTTTAGCCTATAATGTATTCATTTCTAGGAAGTTATTTCTGTTAAGGTGCTCGATTGACT
TCTTGTACGTATGTGTTTTATGCTGAGAACTGTAACAGAAATCAATGAAATTTCAAATTT
ATTTGATTCCAGTGAAAAGATGAACGCCAGCGTTTTACAACTNCACACGACAAACACACC
GCACTCGCGTCAAAAACCTGTGTTGTTCTGCTTATGGACATAGCAGTTACTTGTCCACAT
ATTACGTCCCCTTGTCTAGTTTTATTTTTAACTGCCGACGTTGTTGACACGAACACAGCC
CTATAGAGAGCGAACGTGAGTCGTGTTTACGTGCGCATGTTCTTCAACGACCGAGTGACC
TTTCCTCATGTTCNAAGAGTCAAGAGAAATATCATGAATATTAAACAATTATGAGACTCT
GAAAAGATGAACGCCAGCGTTTTACAACTTGTGTGCTGTTTGTGTGGCGTGAGCGCAGTT
TTTGGACACAACAAGACGAATACCTGTATCGTCAATGAACAGGTGTA
>NODE_21113_length_31_cov_66.129036
ACTCGCTATTCGGGGTTCAGCTCGGACACAACCATAGCATCCCATGTTTCCATATGTGCA
C
>NODE_21115_length_31_cov_19.806452
TCTGGAGTTGGCTTAGGGAACAACTCTGGGGTGAAGAGGGTAGCCTTCTTCATGTTGCCC
T
>NODE_21116_length_34_cov_18.088236
TGAAGAGGGTAGCCTTCTTCATGTTGCCCTTGATCTTCATCTTGCCTTGCAGGAAGGCCA
TCTG
>NODE_21120_length_51_cov_26.588236
ACATTAAAATGAGACTAGTGCTTACTATTTTTACCCTGAGTGTTTGTTGTCTCATCGCTT
GTTTTGGAGAGTCAGAGACTC
>NODE_21169_length_132_cov_4.651515
CTCCTTTTGTGCTCTTTAACACAGGACACAGAGCATGTCTTCACATAACAACCGGGGCAA
GTGTAGATGGCTGTAGTCAAACCACATAGTTCACATACTGTATTTTTTTGTGAGCCATTT
GAAACATCACTCTCAATGCGCATTGACTCGTTGATATGAGAA
>NODE_21230_length_31_cov_35.000000
TGAAGATGGACGCGATTTCCTGGAAGGCCACGTTCTCGGGGTCGTTGGAGCGTGATATGA
A
>NODE_21366_length_42_cov_35.428570
AAAAATAGGGATAACAGGGTAATAATCAAGTTCAAACAATGCAAGCCAGCAAGCCTATTG
CCGTAAGCATCG
>NODE_21428_length_68_cov_78.073532
AAAAAAAGGGCAATCTCTTGGATAGAATTTATCTTGTATCCACACTGTCTAATAAAAGCA
TCAGCCTCCTGAGCTACTTTAATGGCATTGATTGCAGA
>NODE_21429_length_31_cov_37.903225
AACAGATATGGACTTACACCCAATGGACAAGTCCATGCCACTGGAGACCTCAATCAGATA
T
>NODE_21442_length_123_cov_13.146341
AAAAATAATAGTCGCAAGACCAAAACATTTGTATGTAGATGTACCGGTAGTATTTTTAAA
TGCTAAAATTAATCATGGCTTCAATCATTTATTTCGTCTTATCAGCATTGTTTATGTTAG
TCCTTGGAGATGAACGTACAGAAGATTCATTTT
>NODE_21443_length_53_cov_3.905660
TAGTTGGTGACACAAGTCTTCAATAGGATGGCTGGTCCCATGCCACCAATGATAAGATGA
GATCGGAAGAGCGGTTCAGCAGG
>NODE_21444_length_52_cov_55.134617
ACTGCAGACAAGTGTTATACTGTAAGTTCCATGAGGCCAACTGCACACAAGTTACAACAG
AGAACACCTGGGCGTGTAACAA
>NODE_21445_length_114_cov_27.491228
TCACCTTGACATAGCATTGCTCTCCCAGTGGACAACTGTCGCTGCTCGTCACTTGGTACT
CTGACCCCGGGGATGTGGCAGAACACACCATTTTGAGATCCGTTTTACAAATCCTCATGA
CACATCCTCTTTCATTGATGTCCG
>NODE_21462_length_82_cov_15.853659
ACGACATCTTAGATTTTGGTTATTTCTAAAACTTCTCTTTGAGCACACTTGTGTGTGTGT
GTGTGTGTGATTGAAGGTGCGTGCGGGTAGTGGAAATGTATGTTTGTTGGTT
>NODE_21465_length_41_cov_200.780487
GGCTAACTGCCAGCTACAGTGTCAAATGACGCACCGCTGCTTCATGGACAGGCCAAGCTT
CTTGTTCTCAA
>NODE_21467_length_38_cov_98.105263
CATGGACAGGCCAAGCTTCTTGTTCTCAATGATTCCAACAAACATGTGTGGCGAGCACTA
CGAAGAGT
>NODE_21503_length_96_cov_207.958328
ATCTAAAATTTAGGCAGTAAATGGAGACAGCAGCGGAGATCGAGGCGTAGGACGCAGGCT
CCAGCACTTGCATCGCCAATGTTCATTTGGTTCGTGGCTCTGGCATAACGCCGGGTTATG
TATGCA
>NODE_21504_length_94_cov_93.340424
AATAGGGATAACAGGGTAATCATCGTCCTGTGCACCAGCGCCGACCCCTACCACCACACC
GTCAACATCCTCGTCCACGAGTTCGCCCACCTGGTCCACACCTACGCCACGACGGCCGCC
ATCA
>NODE_21519_length_100_cov_2.710000
CAAAAAGCAAGGTTTAAAATGTCTGTATCGCTAGCTTTACATGTATATGAAAAATAATGA
TAATATATTATTAACTGTTTAAAAAATAATGTTTCATGATTTTTACCTTTAATTAACTGT
CTGAGCAAGA
>NODE_21520_length_95_cov_4.010526
TTTTACCTTTAATTAACTGTCTGAGCAAGACATTATTGTATGATTTACAAATAATTAATC
CATTAGAGGTACAATTTTTACACATAAATGTAAAAGTAAGTCCAGATTTTAAATAAAAGG
GTTTG
>NODE_21521_length_101_cov_4.128713
CGGACTACCTTCGAAAATGTGGACTGCCCACCACTTTGATGCATCTCTCCATTTCAGACA
TCCTCCAAACCCTTTTATTTAAAATCTGGACTTACTTTTACATTTATAGATCGGAAGAGC
GTCGTGTAGGG
>NODE_21528_length_43_cov_77.813957
TTTGTCTTCCTATTTCGCAAAGGAATTTAACTTTTACGGCAAGAACAACCTGGAAGCACT
GAAGATTGACATT
>NODE_21555_length_44_cov_43.886364
TAACATAAACCAGGAAAATGTTCAAACTGGCTATAGTGTCGCTGGCAGTGGTCACTGTGA
TTCTTGGCCACCCG
>NODE_21558_length_288_cov_17.621529
AAAAATTAGGAGATGAATGGACGATAGACCAGCTGGATCTGGAAGTGTTCAGCTCAAACC
AGAGGTGGAAGTTTTATGACAGACAATTAGCCAGGACAACCACATTACCCCAACAGGTGG
AGACACCTTCAGAAACAACATGAAATGTTTTGTAAAAATTATCTGTCTGTGATATTATTA
TGTCTGATTTTTCCAATTGCTATGGTGTGTGGCAGNTACCACACACCGTCGATGGATTGA
CAAAAGGACGGAAAGGACACATGAACATCTTATTATTAACACTTTATTTTCACAAGTCGA
GTTTGGTCTCCACCTTCA
>NODE_21618_length_57_cov_35.912281
AAACATCCCATAATTAGAACTTGCAGTTATTTCCTCGTCTTTGTGCTTCGTGACGACCAT
TTGATGACGTGCCCAGGCAATACTTGG
>NODE_21629_length_162_cov_53.462963
TGGATGAACAAACTCGCCACAATCCAATCCATGTCCCTGTTTCTACCACGGTCCACGACG
TTGTACAGAATGCTATCCAGTTGACGACATTGGCTAGGAATGTTATACAGAAAGCGATTT
TGGTGGCGATGTTGGCTCCCATGAATCCATCCTTGACTCCCATTGTTGTGTTGGTTTGTG
GCTAACTCTTGG
>NODE_21631_length_103_cov_79.456314
AAGCCTGAATGGGTAATACTACTGACATGGATTCTGAAGTACCCCGAATTGGATTGGTAG
TTTAGGAAAGGGACCGTTGTCAGTATTTTGGGAATGGTTGGGAGTGGTTCGGGAAAATAA
ATAAACCGTGAGC
>NODE_21644_length_49_cov_17.469387
CCGAATTTTAAGTGGTGCAAACCGCCTCCACGTTATAACGACACATTCTATGATTGTATC
ATTACAAGGCTGTAACGTA
>NODE_21647_length_32_cov_1.000000
TACTGCTGTTGTAGGTTTAAATGCAGATCTATACCAACTCCTTGGCCTGAATTTGACCGA
CA
>NODE_21722_length_86_cov_68.418602
TTTCGTTCAGTGACATTGCTTGATTCCTTATCGCTCTGTTTCTGCTTTCTTGAGTAAAAC
GTCATTTCAGTTTATTCCTTGCCTGTAACTGGTTAAAGATTATGGATTCTTGCAAA
>NODE_21762_length_175_cov_3.542857
CTGCTTCCAACGAGATTTATTCACTTTCAAGAAAAGCACGCAAATATAAGGGGCGTCTTT
GATTCATTCTTGAAAAGAAAGATGAACACGCGCTCCTTCAGCACCTTTTCTCTCCTTCTC
CAAATGAGACAAGGAAGAGATGCAACGGCCTAGCCAGGGACAAGCATCACAGGATGCTCA
AAAAGGTCAGAAGAGGTTAACGTTA
>NODE_21833_length_35_cov_40.285713
ACAAGAGCAGGAGGTGAATGGAAGGGTCTGTGTAAAAGTGCATCCTTTGTTAAGCCTAAC
CGACA
>NODE_21876_length_35_cov_79.514282
ATACAATATGCAGTGTAATACAAGCATTAAAAATTAGTTGGGATAATGGAACTGGATTGG
TTTTT
>NODE_21878_length_67_cov_69.268654
CATCCGTCAGCCCCCCTCCAGGACTTCGATTGTTAACTTCTCTGAGTAACATCCAGTCTC
ATTATCATCAAGTTTACGTAGTACTAACAACTATTCT
>NODE_21879_length_118_cov_2.847458
ATTTGATTGCGTGACAGAACTGTACTTGGTCAGTTCGAAACTTAATTGATTAAAAATAAA
CGTTTTCGGCCTGAGTGCTTTCGCGGAGTGTTGCCATGGCGTTTCATCATGAGTGGGCGT
GGTACAACCTCTACTTCCCCAACCCCGA
>NODE_21880_length_62_cov_2.580645
TTCCTGTTGTAGGTCAGGATCCTGTTGGCCTCCATCCCACCGTTGTTGAACCATTCAAAA
TCCCGCCATCTCGCCATGCGGTGCCACTCCTG
>NODE_21887_length_422_cov_8.521327
GAGCAGAATCAACTATTGCATCTGGTCATTCAAGAGCTGGCTCATCCAAGTGGAGAGGGC
ATATGATTACCAAGATAGGATTCAGAAAATATTAAATAATATCTAACCTGTATAAGATGG
CTTAGGGTAATAAGCATTTAATTTAACCACAAAAAATGCAGACTTATGAGAAACTGTGTT
GAATATTAGTAAAAACAAGTTAAATCTGAAGCCTTTTATTGTTGCCGTTTCATGACAAGA
TTGAAGTCAGAAGTGGCCAACAGCAAATATTTTCTGTTTCAAGGATGTAATTATTGCTGC
GTGCCAAAAGGGGCCACCAGTGACATAACTGTTGTGGTGTGTAGGGTCTCATCCAAATTT
GTCTTATGTGCCCTAAGTGGCACATATGTCATGAGTTTGCCACCCTGATCTGAGTTAATG
GAATATTGATTTGTGTATATTTATGTACATTT
>NODE_21892_length_62_cov_68.258064
TTTGAAAGCTTAAGTTTCTTAACTTAAACGTTCGTAACTACTGTGTGACAAGATACAACT
GGTCTAATTTGCTGCTAAAATCAGGAAATTGT
>NODE_21893_length_115_cov_2.573913
GTTCAGCTTCCGGTGCTGCAACGTCCTTGGGCGTCAGCCAAGTGACTGCTACATCACTGG
TTACGTTAATTACTGGGACGATTATCTGTCCTTGAATGTTCCGGAAGGAAAGGCCATCAA
AGGCGCCTACAGCCACCACAACAAC
>NODE_21894_length_71_cov_1.478873
CTGGCCTCATCAGGGGTGATAGTAGCACACTTGATTCCGACTTTATACTTCTTGATTGCT
CTTGCAGCATCCATAGTGACCTTATCATCAGTTTTGTCTCT
>NODE_21909_length_96_cov_74.645836
TCGAAATCTGTTTCGCTGTGTGACTTGTTCGTCCCGTGACGTCAGTGGCACACAGAAACC
GTTCTGATTGACCAGTCCATGGTTACACACACATACGAACTCGACGTGACGAGCGCAGTA
GGAGCC
>NODE_21918_length_90_cov_137.511108
TTTTTTAATTATAACATCAAAAACATTCATCGAAGTCGATGACGTCACTATGACGTCACG
GACACTTGATGATTGGAACACAACATCCGGGGTATTGCAGGGTTTCGTTAAAGGTCAAAG
>NODE_21992_length_31_cov_1.064516
TGGCCGATTACCTAGTATCTAGTTCATCATTAGATGCCTGCAAGGAAAACGTGAGATGAA
G
>NODE_21998_length_36_cov_134.111115
ACACCCTGCGCAGCCTGACAAGGCACCATCATTCACATAGCTCTGATCCACATTGCATTT
GTCTTG
>NODE_21999_length_37_cov_2.675676
TTATCCAAAATACTACTTTAACAAACACCTGTGCCTTTGTTATTAGCATCACAGCAATCT
TACTCTA
>NODE_22000_length_157_cov_6.923567
TGTTATTAGCATCACAGCAATCTTACTCTAGCGTGCACACACATACCACCGACCGCACTA
AACTGCACTTGAACAAAGACAATGTCCTTGAACTAAGCATAACTCCAACAACCCAAGTCC
AGTACAGTCACCAGCGTCATGCTTGTCTATCCAAGTCCAGTGCAGCCACCAGTGTCATGC
TTGTCTA
>NODE_22001_length_31_cov_19.645161
TGCAGCACTGAAACGACCACATTCTGTCTTGCCTCGAATTGTCATGGACGGACTCTATCC
C
>NODE_22002_length_38_cov_16.394737
TCACTCACATTTGTGTTGTTTGATGTTGTATAATACTGTCACTGTCATGTTACCCACATA
GTAACCAG
>NODE_22003_length_73_cov_15.849315
TGGACTATGACGTCGCTATCTTCAGACTCCTGGACCAGCCACCGACCAACAACTACGTGT
CCGCTGTTTGCTTGCCCAACGAGGATTGGTTCGTGGGGGAAAC
>NODE_22004_length_233_cov_2.995708
AAAAATCGGTCTAAGTAAGACTTGTTGCACCTTTCGTTTAATTTCAATTACATTTAAATT
TAATATTGTGATTTGTGTTACTTTTTTTGTATCCTGATCTAGTATCTTGTATCCTGATCT
AGTATCTAATATCTTAAAGTTCTGAATAACATTTTATTTTTAAATAACTAAATCAATCAC
CAAACCCCTTCTTTGCCTTTTTTCTTAAGATGCTCTTTAAGTACGATGCTCTTTGAAGTA
CCGGTATCGTATGTCTTTTTGTG
>NODE_22005_length_31_cov_6.354839
GAGTACTGAACACAAAAAGACATACGATACCGGTACTTCAAAGAGCATCGTACTTAAAGA
G
>NODE_22006_length_117_cov_22.820513
TCTGTTTCCTGGATATGAATTCCATGGTTCATTTATGGGCAAGATTCCAAAGACACACGT
CAAGCAGCCCAAGGCTAGCAGTGTTAGTATCAAGTTCCTCATGGTCAGGTTTCGAACCGA
GGCGGCGTGGCTTCTAGTTAGACAGAT
>NODE_22049_length_353_cov_10.654391
CTTTTGATGGCTGCTGCCCAGATTGTAAACTTCCAGGAGATGAATGTCCACTTGTTTGGG
GACAGTGTTCACATGTGTTCCACATCCATTGTATAGTAAAATGGCTCCAGTCACAGACAG
TCAGCTCACCTTGTCCTATGTGTCGCCAGGAATGGAAGTGGAAAGCTGGATAACTACAGA
CATTTATGTATTTCTTTAGAACTAAATTTGTAAAAAAAATACTTTNCCTTTATCAACTAT
TCTGAAGTAAAAATGTTGTCATACTGAAATTAAAAATCATTTTACCCCGATTCTTTCCAT
AAAGACAGTGGTTATCATAAAAATTCATTATCTCACAGAACTTGTTCATATAATTTTAAT
TCAACTTAATCACCTCAAATTTA
>NODE_22050_length_184_cov_9.847826
TCACTTTTTGCACCGGTGCAGACCATTTTCCCTGAGCTAAATATTAAAGCAGTGGTTCTG
GGATCCCTGATACGCATAATAACGGCAGCAAATCGCTTAGGGTTGTATTCTGCATTTCTA
GCCCTTAAGGCTATTGTTTTTAAATCAAGCTTGCAGGCCAAGTTTACTGTGCAAACAATG
TTTTGGAGTTGCGGCTTGATACCTGAAGTTGAAC
>NODE_22051_length_340_cov_8.567647
CAAGTGACGAAAATATCTTCATGTTCATGGTGGTCAATGCCCTGATAAACTTGCTTGTTT
AGGATCGTCCTAACAGGTTCCTGTGTGATGTTTCCCTCTTCAGAACATGCCCAGAACTTA
ATGTTTGCATCTTGACCACAGGACATGAAGAAGTTTCCACTTCTGTGTGCGCACAAACCA
CGAACAAGCCCATCATGTGCCAAGACACTGCTAACACTGCGCTTTGATGCCAAGTCCCAC
AAACGAATCTCCCCATCACTAGCAGCCGAAATTACATGCGCAAGTCGTGTTGGGAACTTG
GCTAAGGCTTCTATTCCATCTTTGTGACCTTCCAAACCACACAAGAAAGGTTTTGCAAAC
ACTCGTTCTA
>NODE_22059_length_49_cov_48.020409
AAAATAGGGATAACAGGGTAATAACAACCTCTAAAGTTTTAAAAAGATGTCTTGGAGCGT
CAGTGATTCGTTTAAAGCA
>NODE_22063_length_48_cov_217.812500
GATTCACTCAGTTGAGCAAAGGTGAAAGGGCCAAGCTTACCATCTCTCCAGACTATGCTT
ATGGGGAAAAGGGAGCAT
>NODE_22065_length_85_cov_58.023529
GACTATGCTTATGGGGAAAAGGGAGCATCAGGTGTAATCCCACCGAATGCAACATTGATC
TTCGATGTAGAGCTTATTGATATAAAAAGAAAGTAGACATTGAGATACACAGTGA
>NODE_22066_length_131_cov_10.450381
AAAATAGGGATAACAGGGTAATCTTCCTCCGCCTCTCTCTCAGTGTCGCGCCCGGCCTTA
CTTCAACATGCAAAACGACGACGGAAAAACCGTAGACCTCTACATCCCGCGCAAGTGCTC
GTACACCAACCGTTTGATCACTGCCAAGGACCACGCTGCCG
>NODE_22100_length_31_cov_88.419357
CCACCAAAAACGACATGCGCCACACACGCAGCGTGCTCCAGTTTCTTGTACTCTGCCTCA
G
>NODE_22101_length_53_cov_67.471695
CGTGCTCCAGTTTCTTGTACTCTGCCTCAGTGCAGTACTTGGTCTTCACCAAACAGTCGT
AGGAGTTGGTGCCATTCTCCTTG
>NODE_22129_length_140_cov_86.635712
AGCTTTAACTACATTAAGATCTGGCCATAGCCTGACCTCCAGGGGCCTGAACTTCCTGCG
CCTCCTGCACCAGGGCGCACAGAGTGCAGCACCAGATGGACAGGATGTCCGTGATCAGGC
TCCCCTCGATGTTCCGAGAATCTCGTATTTTCCCGCGGACCATGATCATG
>NODE_22142_length_105_cov_69.295235
GCCAACACACATTCAACATGACCCAATTCCAGCACGGTCTTTTCGGCTGCTTCGACAACA
TCGGCCTTTGCCTCATCACCTACTTCGTGCCGTGCTACACCTTCGGCAAGAATGCCGAGG
CTGTGGGTGACTCGT
>NODE_22143_length_188_cov_42.872341
ACATGAGGTCAAACTTGTGGTCAAGCCTGGCCCATGCCTCCGCGATGGCAGTTGTGTTGC
TCAACATGCACACAGCGCGTTGTACTTTAGCCAGATCACCCCCAGGGACCACAGTTGGGG
GTTGATAGTTAATACCAACTTTAAAGCCAGTTGGGCACCAATCAACAAACTGAATGGTCC
TCTTGGTCTTGATTGTAGCAATAGCTGCATTGACATCC
>NODE_22144_length_38_cov_66.026314
CAGCTGTCAGTTGCTGAGATCACCAATGCCTGCTTTGAGCCAGCCAATCAGATGGTCAAG
TGTGACCC
>NODE_22145_length_45_cov_37.622223
GCCAGCCAATCAGATGGTCAAGTGTGACCCTCGTCATGGCAAGTACATGGCCTGCTGCAT
GCTGTACCGTGGTGA
>NODE_22196_length_31_cov_30.483871
TAAAAGTGTGGACTCATTCAAGATATTCGGCCACAAAGGGACAACGATGGATTCCAGATC
T
>NODE_22197_length_229_cov_10.794760
ATCAGACTCAGGCTGTACTAGATAAACTGGAACAGAAGGCAACCATTAAAGATGGAAGGA
AATTCTGGCACCAGCCTGAGGCCCCCAAGACTACAACCAACTCCTGGGAAAACCCCAACC
CAANACTTGTCTCTTTGAGATTGCCTCCGAAGAGTAGGTGTGTCCTGTGACAAGACCGAA
ACTTACGGGAGAGACTTAAACGGTTCGTCTGGATGTCGTTGTTGAAGTTGTAGGTCTAGT
GGTGTGTCAACTTGCGGTG
>NODE_22198_length_175_cov_13.274285
TTGATAGACAACGGATAAACGACAATGTCTTCATTTCAGCAAAATGCACCTAGTAGTGCT
CCTTCAAGTATATCCCAAGAAGAGTTTACTGTAAGAATTCCAAGAGACACAAGAAGAAAA
TNATGTTTTGTCGTTTACTGGAGCTATGTGACGGGTTTAAACCTCGTCCGTCACTCATGC
CGGCTCTGGTTTTCCTTCTTAGTTC
>NODE_22265_length_34_cov_257.500000
GACTATAGACAGCTCTTTCCATTATCCTAGTAGGATCCACCTCATGCACCCTCCATGCTG
ATGC
>NODE_22267_length_31_cov_75.064514
TGCTGCACAGTTCAACTGTCCACTCAAAATTAGCCTCAAGGAAATCTTCTCCAAACGAGT
T
>NODE_22271_length_36_cov_46.583332
TTCCCATCTCAACTATAGCATGATTCAGGTATTTCAGTTAGCAGTCACAGTGGCTCTGGT
TCTCAC
>NODE_22272_length_111_cov_13.972973
AAGAGATTTTATCTATGGTATAGACAAAGAGTTGCCCGTGAAGGAGTTGTTTGTACCGTT
CACAGACGACAGGTGCAAAACTTTGATTGGGAAGCCGAGGTTGTTCTTCATACAGGCCTG
TAGAGGTAATTTAGTGGACAG
>NODE_22273_length_60_cov_108.283333
TTTTTTCTCTGCTGCAGCTGGAGCAGCAGCGGCAGGAGCAGCACCACCTTTAGCAGGAGC
AGCACTAACTGCTGCAGCAGCAACAGCACC
>NODE_22541_length_179_cov_10.385475
CAGACTTTAAATTTGTGAGATTTACCTGCAAAGTTTGCTCTTTAACAAGATATTTTTTTA
TTTTATACAGCTAATCTTTTATTTATTTGTTTATTTCATTTTGACTTTGTGAAATCACGG
ACATTCTCTTATGGGCTGACAACAGCCGGGGTACTTCAGGCTCCTGTCAAAAGTAACTTC
ACAGCCATGAGCATTGAAGGCCACTGATC
>NODE_22549_length_49_cov_41.795918
ACGGTCAGATTGCGGTCAGCCAACCCACTGGACTATCCTTCCATTGACTAAAACATGTGT
GGATTAAACGAGGAGACTT
>NODE_22555_length_103_cov_3.699029
TTTTTTTTCCTTCTCTATCAAAATAAAAAGTTTAATCCAAAAAGACATTTTTATTTACAG
TAAATTACAAGACATTTTTATTTACAGTAAATTACAGTATGGACTCGGATATAAGGTGTT
GGACTAAAAAAAA
>NODE_22556_length_31_cov_5.354839
AAAAAATAGGGATAACAGGGTAATATCCAGGTTTACCGCAACTCCAGGTTTTTAAAAAAA
G
>NODE_22563_length_32_cov_39.031250
AAACCCCTACGATAACTTTGATTATTCCATCTAAATCTAATAGCAGAGATCCATCAGATA
GA
>NODE_22578_length_115_cov_1.556522
AGGATATTTAGGACTATTTTTTACTTTTAACACTTCAGGCATTCGATTTTAGACTTGGTA
CGGTCTTGTAGTTTCTGTACACTTTTTCATTGAACAATAGTTTACGAAGGCTTTAGAGTT
GCGCTCTTCTCTATCGAAATTGAGA
>NODE_22584_length_94_cov_4.127660
CGACGTTGGGGACATCCATGTTGTGAGTAGAGGGGCAAAGCTCCTCATACTTTCTTCCGG
TGAAGATATCAATACCGACCAAGTGAACCTTAGCACCACCGTGCTTTCCGGTCTTGGAGG
TGGA
>NODE_22601_length_60_cov_7.783333
AAAAATAGGGATAACAGGGTAATCTTCCGGAGCCATCAGCCGTAGCAACGTACCAGTCTG
AGTGACCTGACCACAATGGCAAATGCTGCC
>NODE_22609_length_40_cov_61.849998
AAATGAAAAGCACTAGAAATGACGTTTGCATCAATTTTATTCCTCCATTTTCTGTTGATG
GACTTTAGCC
>NODE_22610_length_80_cov_52.262501
AAAGCATTTAAATAGAGTCTTCTGGGCAAAAGGTACTTCTCTGTCTGTTAGGAAAACCGT
GTAATACGGAGGGGTTGTTATATTCGTTTTTCCACAGCGGCAATTAAACG
>NODE_22618_length_154_cov_1.610390
TTTTGCACAAGTTCTGGTCCTTGTGCATGTACTCGTTGGACTGAACGTTGCTCTACAATG
TATAATGGAATCTGTGTGAACGCTATTGATACACTCGGGGTTTTTCAGACAGATCATATT
GAAACTACAGACGATTTTAAATTTCGATGTCAAGATATGGAAAATCTAATGAATAGTTTA
AGTC
>NODE_22626_length_126_cov_33.873016
AAACGTGTGGGGCCCGGGCTCGGCGAGTACATGTTCGACAAGGAGACCCTCAGTTAAGAC
ATACTGTCGGGTCAAGTGTCCACACAAGGATTCGGACAGGCGCACCACGGATTGTCCCAT
GAGTTGATTTGATGCTTCATGCCCTCAGAACGTGAC
>NODE_22669_length_39_cov_37.974358
TGAGTGTGCCCAGTTCCGAAAGGAACGCTCGTAACTGCATGGCCGCTCTCATGCCTCCAT
AGGGTCCAG
>NODE_22699_length_101_cov_189.089111
GCGGCCTTTATGCAGATAGGTGAATGTCCACATGGCCACAAGCCAGGAGATACCTGGGAC
GATGGACAGTGCCAACGATGTGACTGCATGGAGAATATGTATGCCTGCTACAGCTGTGGT
GTCTATGCCAT
>NODE_22700_length_31_cov_298.967743
TGCCTGCTACAGCTGTGGTGTCTATGCCATTACTTTTGACCAGTCGTCCTGCTACAATTA
C
>NODE_22705_length_82_cov_54.597561
AACCCTCCCATCTACACGGGCACCGTTAACTGCACCAACCTGGTCGTTGTTAAAGAGGAC
GCCAGATACAGGAAGCCCGGCACTGCTAGCCGTCGCGTTATTCTCCAAAAAA
>NODE_22706_length_66_cov_84.924240
GTGTTCAACGACGCCTTGATGGTAGGGTCATTTCAAGCGTTCATTAGTCTCCGACTGGGG
TGGTTGGTGTTCAACGACGCCTTGATGGTAGGGTCA
>NODE_22708_length_130_cov_100.676926
GACGCCTTGATGGTAGGGTCACGGTGACGTCAGCTGATAGAATATCGGTCCAAAACACAA
TTCTTTCTCTGACAACTGTGGCCACGAACTGAATAGCGCCCGATGTGAGATTCGCTGGGG
CCGTCCAAAGAACTGTGACGGAATCCTTGAGGGCTGGGGA
>NODE_22764_length_128_cov_3.773438
TATTGGTATTACTTAAATTTAGATAAACTTCTTCTATTTTGGGTTGGAAACAGGAGGGGT
CAACATTCCGAATAGGGGAAGGTTAAATGATTCCTTTAGTGCCTACCTTTAGGAATTGTA
CATTTAACATTTTGTATGTTAGTTTCATACAATCAATG
>NODE_22765_length_192_cov_4.880208
GTTTTGTGGAAACAAGCTTTAAAATATAACTTTTGTTGAAAGATCTTATATTGGCGAGAA
AGTTCCGAAACTGATAGCATTATTGTACTGGATTTTCTCAGCAGGCAAAAAGAACATGGG
CACATAGCCTAGACGCCCAGATGACCAGACTATGCTAAGCAAAGCTCCTTTCTGAAAACC
AGGAAGAAAAGCAATATGGTGCACATTTTCGCCTGATCTGCC
>NODE_22818_length_100_cov_2.360000
CAAAAATCAGTTTAGCTTTCAATAGTTTAGGCACAAATCGAAATGTCAATGAGACCCTCG
TACTTCTTTTTAGCACATCACCAATTGATGCCGACACAGTGGTCAAATTGGCCAGATCGG
AAGAGCGTCG
>NODE_22819_length_34_cov_63.352940
AAAAACTTATAATAACAATGTCCTTGGGGAAAACAAAAGGTTATTTGGCATCACTCTTCT
CTAG
>NODE_22853_length_110_cov_15.600000
CATGGGCAGCACCGAGTGCCCGGGCACCGCTTTCTGGCATCTCATTAAGACGTGGCCACA
TTACTAAATAAACATGGCCACCCATCAAAGAGTTTCAAGGACCATTGATCTGGACACGGC
AGATCGGAAGAGCGGTTCAG
>NODE_22908_length_64_cov_27.890625
CAGGATATCAAGACGGCACACATTGAGGTCATTGGCTGCCCACTCATCTTTGGATAAACA
AATGAAATAAACAATGGCCCGTGGTCAACTCAAG
>NODE_22954_length_61_cov_48.852459
ATTTACAACACAGCTTTTACGGGCAGATATATATATACTACGTGAATAGCTAACGTATCT
CTGCAATGGTCAATACGTTCAATCAATATCG
>NODE_22955_length_123_cov_103.365852
GTCAACCCTGCAGTGGACGCCCTGTTCCACACAGACGACCCTGCGGCCAAGGAGGCGGGG
CTGAAGAAGGTCAAGGACGAACTGGCGCCCCGCACCCTCGGCTTCCTGGAGGCCATTCTG
GAGAAGAACGGCTCCGGCTACCTGGTTGGGGAC
>NODE_22968_length_140_cov_4.471428
GCGAGGATAACGAGGATGCCAAGTGGACCCGTGTCAACGAGAACCTGCTCTTCGACGAGA
CCTGCGACTGCATCGATGTCCACGCCAACACGACCATGCTCGTGTTCACCAGCGACTGCA
AAAAGGCTGCCGATCTCTCATTCGAAGGCGAGTTCTCCAAGGACATGTCC
>NODE_22981_length_41_cov_62.682926
CCTACACGGGTCGTGCCGCCCTTGACTACAACGGTTACGGTTGTTTCTGTGGCCTTGGGG
GGTCTGGAACC
>NODE_23008_length_56_cov_30.017857
TATTGGCAATAATTACCAATTTGGCTTTCCCTGCTCTCAGGGTCTTCAGTGTCTGCTTAT
AACCCAAAACATATTTACCAGACTTC
>NODE_23023_length_35_cov_486.028564
TGAGTCGTACTGGACTTGGGGCGCCATATCCAGTCGTAAGAGGGTGGAGAGGAGCTTTAA
AGTTG
>NODE_23033_length_63_cov_11.079365
TCGGGAATGCCCAATGCAGAGCGCAGCTTGTTGTGACCCTCTAGGAAGGCAGTTATAGCA
GAATCAGACAGTGTTTCGGGCACGGTAGCTTGG
>NODE_23062_length_31_cov_1.064516
AGTGCCCTCCCCTGGGGCGAAGTTCTGGTATGTCAGTTGTGTGCCATCCTCCCAGACAAA
T
>NODE_23120_length_41_cov_8.365853
GCAATAGGATTTAACCCAGCATTTTCAGCCAGAGTAAATGGAATAACCAGATCGGAAGAG
CGGTTCAGCAG
>NODE_23121_length_35_cov_27.285715
AAAAAAATAGGGATAACAGGGTAATGCTGATCTCCACAAGGCTACTAGTGACATCATCGC
CCTTG
>NODE_23122_length_31_cov_157.806458
ACAAGGCTACTAGTGACATCATCGCCCTTGCAGAAGCCATTTTAGCCAATCCTGACTTCA
A
>NODE_23178_length_39_cov_140.641022
AAATCAAGGCATCGTTCAGATTTCTTCAAGTAGTTATGGCATTTAATGTTGCAAAATTGT
TCGTTTTCG
>NODE_23185_length_32_cov_3.500000
TGTGGACGCCTCAGGGAAACCAAAGTGGTTAGAACGATTACCCTGTTATCCCTATTTTTT
TT
>NODE_23200_length_249_cov_21.052208
ATGTCCTACACCAAGAGTTACGAGATCATGAGCGTTGCGGTCCTCTTGCTGCTGACACTG
GTCATATTCGAGCCGCCATACTTCTTCCCATCCTGGGTGGTTAACAGCGTCCACAAATAA
ACAACATCCCGTCCAGTGTATGAGAGATCGGAAGAGCGGTTCAGCANTGTAGGGCAGGTC
ACATACTCTCGCAGGTCGTTATTCAGGGTCTTCGGTAACAGATTGTTTCAGTGGTTGACC
CCACTTACCCAGATATTTATTTTGATAACTTTACGTTTT
>NODE_23201_length_65_cov_31.153847
AAAAAATAGGGATAACAGGGTAATTAGTCACTGATTAAATCTGCAGCCCTGAAGGCGACA
AAGATCTCACAGATCTTCTCAAGTTTCCGTGTATC
>NODE_23238_length_44_cov_94.045456
TTTTCTGATGGTTACACGTGTGACACCAGGGACTGGCTTCAAACCAAGCTTGGACATGGC
TTTCCTTGCTTTCT
>NODE_23241_length_31_cov_77.580643
GGTGTATATACCCTATTTTCAAAGCTTTGTCCGTACTGGGCTTCAACCGCCACGGTGTAC
T
>NODE_23320_length_37_cov_110.324326
AATCCATGCGTGACGCTGTTGGTACTATCAGACAGAAATTACGGATGTCAACACGAAGAA
GTCGAGT
>NODE_23321_length_102_cov_2.490196
ACTTACCAAGAGATCAAAACAAAACAAAAGCAAATCCATCTCCATCAATCCAAACGAGAA
CAATGCTCGGTGGAATCGTTAAATTAACCCTTTTCGTCAATGTTTTATTCTTGTTCATCA
TTCTCCTCTGGC
>NODE_23322_length_397_cov_15.335012
GCCGTTGTCACGCTCGTCATCTTGGCGATTTGCCGTTGGGTGATGAAATCTCCATTAGCT
CGGACAATCACAAAATGCCTGTCTAGTGCCTTAGACACCTGTATGCCGCTGTTTGTGCAC
ACCGCCTCCTGGTTAGCGATCCCCTTACAAGACTTGATGGGGTAGCTGTACAAGCCGGAC
ACCTCCCCGACCAGTTCCCACTCCCTTCTGTCCAGCCTTGACCACAGAACCGCGGCAGCC
ACCACCGCNCTGGTCCGCTGGTAACATACTACCCATCCTACCGATTACTTGCGACGTTGG
AGAGTGTCCTAGTCTAACAGACCAGAGGAGGGTAAGGACTTCTCAATTAAATTTTATTTA
TCTTTTTCGCAAACCGGGAACGCAGTCAAGAACCGGTTCCATTATAATGGGACAATAGGG
ATAAAAA
>NODE_23324_length_35_cov_232.000000
AACTCCAGCTGCCCCAAGGTTGTGACGGACATGGGCTTGTCGTGTAGTTGTCCAATACCA
GCTGG
>NODE_23401_length_194_cov_2.654639
AAACGAGTATTTTTAACAAGTAGTAGGATTTATTTAAAGCACCGTCCAGTGATTACAATA
AGACTTAGGTTTTTTTTAAAAGAAGAAAGCAAGAATAATAACCCAGATAATGGGAGCGAT
AAAGATGTGGAATATTGCTTCAATGATAGTTATAGTTATGTGTTTGACACAGCTCAGCCA
ATCAGAGATGTGGGGTGGATTTAAATCGTTCACGAACTCGGTAT
>NODE_23407_length_97_cov_50.103092
CATCTTGTGCTGGAGTAAATCCATGGCGTTACGCATGTCTCCAGAAAATCTTGATTGAAC
CTAACAGTTACCTAAGGCATCATCAACAGTCCTCTCTATTCTACCTTGTATTATTCCCGC
TTTTTCA
>NODE_23415_length_31_cov_28.322580
AGTCGCCCAAAGTTAAGATGGAGTCGCCAAAGGATCTCAAGTCCGAGTCCCCTGCTGGTG
A
>NODE_23417_length_180_cov_2.555556
GTCCCAAAGCCCAAGAGATCGAGCTATGAGAGAAGAGAGACGCAGAATTCGTAAAGAAAA
TGAGGAGCATCAAAGGGAATTAGAATCAGAGAAAGATAGAAAAGATGACAAAGAAAAGAA
TGATCAAGGTCCTCCTATGGTTCGTGAAGCATGGCCACATGGGCCTCCTCCCCCTCACTA
TAGAGGTGGACCCAGAGCTCCACATCCAAG
>NODE_23432_length_183_cov_24.355192
AAAATAGGGATAACAGGGTAATCAGACAGGTCGTGCACTCTTCAGTGCGTCACGTGCTGG
GCGTGTTACTACAAGTGGCGCTCGCACCACCAGACAGTACGGCAGACCAGGCAACTACAA
CGATGCTGTCAGAGATTTCAACAGATTTCAACCTGACGGCGTCCGGTCATTTACCGGACC
CAATGGAATCAGCAGATCGGAAGAGCGTCGTGT
>NODE_23433_length_52_cov_96.673080
GACAAACAAGTCATAAGAAATTATTGATCATATCTGAACTTTCGTACAAATTCTCTACTA
TTAGGTTTGGGAGATCTAATCT
>NODE_23434_length_101_cov_71.792076
CTCTACTATTAGGTTTGGGAGATCTAATCTCCAGTGTAGGACTTCCGTTACTACTGCCAT
CACGGACGGTAATTCTGTGGTTACCAACAGTTCCTGTTCGTCCGCTGATGCCATTGGGTC
CGGTAAATGAC
>NODE_23440_length_37_cov_127.864868
AAATACCGGGTATACTATCTCCAAAGTCTTACACAATACACAGCTTCATTGGGACCTTCA
CATTTTC
>NODE_23445_length_184_cov_41.038044
AACTGATTTGCGCTTACGCTCTCCAGTGCGTCGTGGACGATAGCAAGAGTGGCCCTTGCT
AAGTAGGAGCCTCACGCGTCCAGTTGTAAGCACACCTTGTTTCATAGGGAAACCTTGTTT
GTCATTTCCACCACTAATGCGCACAACATATCCTTTCCACTCATCTCCTAAACTGTCAGC
TGAAATCTCTGCAAGATCGGAAGAGCGTCGTGTA
>NODE_23446_length_136_cov_57.191177
ATGGGTTATTGAAGAAACCCAACATCAGAGCAACATGAAGCTCAACATCAGTTTTCCAGC
GACTGGTTGTCAAAAGTTGATTGAAGTTGATGATGAAAGGAAACTACGTCCATTTTATGA
CAAGCGTATTTCTGCAGAGATTTCAGCTGACAGTTTAGGAGATGAG
>NODE_23447_length_81_cov_126.283951
TTCCGCCAGCTCCGTCCTCCAAAAACAGCAGCAGGTCACGGTTGTTGTCTGCTGAGGTCA
TGGTCAGGCTGTGCTTCAGACCGATGGTGAAGACTGTCATAGATCGGACTA
>NODE_23471_length_41_cov_29.512196
ATAACAATACTGTAAATTCCAAGTCACGTGGTACAGGAGGTTTCTTTGAATTCTAACCGA
CGACCACGCCC
>NODE_23472_length_59_cov_57.254238
GCTGTAACCCAGAAGGCTTCGTGACGCACGGCTGTGTGTACACCCCGTACATCAACACCT
ACGACAACATGCTCACCTACAGGGTGCCG
>NODE_23479_length_43_cov_25.348837
GAAATAAACGGAGCTAAAGTCAAAGTAAACGAGGCCTCAGTTCTTGTTGCAGATGGCAGT
GTCACCAATGGAG
>NODE_23480_length_137_cov_6.941606
TTGTTGCAGATGGCAGTGTCACCAATGGAGTGGTGCATGCAATAAACCGAGTTCTCATCC
CTTCAGATATTAAACTACCCTAATTTTATTAGATTTGGCCAATACCATCTGCGGTCTATC
CACTGTTAAATGTTTTCAAACATTTCTGAGATCGGAAGAGCGTCGTG
>NODE_23484_length_41_cov_149.731705
AGACGATGCTACTCAAATACTGGCAAACACTACTGGAATATGTAATTAAACTCCAGCCTC
AGCCAGCTCTG
>NODE_23485_length_61_cov_124.360657
TAGTAAAATAAATGTACAAGTCTATAAATGAACTTGAGTGATGTGTGCCGAGAGTGTCTG
CACGGCAAACAGTCAGCGAGAATTTGAAACA
>NODE_23529_length_130_cov_32.161537
TTCTACGTTCCTCTTGACCTTTCCAGAGCTCATCAACGTTGAACACGCAAACTGCAGCAT
ATCTGTCAGGGCAGAGCCGCAGACTCCTAGAGGATGTGCGCTGCCTTGAATGTTGCACCG
ACGGATCTGACCGGCTACAGGTTTGACGCCAACATTCAAC
>NODE_23530_length_75_cov_56.213333
GCTTGATAATTTAAAATGGCTCGTGCAAGCCTCTTTTTCTCCAACGCCTTGACGGTCACA
GTCGTCATCATACTGTTGTTGAATGTTGGCGTCAAACCTGTAGCC
>NODE_23531_length_407_cov_5.280098
CTGGGTTATCCGCTTCGAAGCGATCGGGGTCTACTTGATTGCAATAGCCGCTCTGTCCGG
CTTGAAGTTCGAATGAACCATCAAGCTCGTTCTGTGAACTTAGCTTGGCTGGAATTAAAT
TCTTAGCTGAATCTGGTTCGATTTTTGCAGGAACAAAATGTGAAATTTGTGAAAACGCTC
TGCCTGTTTCTTCAGCCACCAATTTTCTTCGGTCTGCAACCTGTAGTCTTTCTTGTAACA
AATAGATCGGAAGAGCGTCGTGTANGAAGCCAGACGTTGGACATCAGAAAGAACATTGTT
TAGCAGTTAATCCCGAACCACAACTAAGGCTCGGAGGTAAAGCTGAGGAGCTATAAACCT
TGTTGCTTGCTCACCAGACAGAACCTATTCCGACCCTTTACCAAATGGACGTACGACTAA
ACCCGTTGAGTACAATA
>NODE_23596_length_36_cov_311.972229
TTTTTCTCTTGGCCTTCTGGTTGCTATCATTGGAAGCTGATTCTAACGTCACGGATTTGA
ACCAGT
>NODE_23662_length_192_cov_34.692707
GATGACATCAGAATACACACCTGGTCGCCCAGCCTCGGCGCAGCCGTAACCCCAGCTCAC
GATACCAGTGAGCGTCCATCTGTTCTCTCTGTAGGTGTATAGTGGACCGCCACTGTCTCC
CTGGCAAGAGTCGACGCCGCCTTCAGGCAGACCAGCGCACAGCATCCTGAGAGTGATTGC
CCCTTGCCCGTACCTCAGCTCGCAGACTGATCTCGGCTTGAT
>NODE_23685_length_103_cov_107.728157
CCAAACTGTTGTAAGAATGGTCGTAAGTGTAAAGGTCCACAATAGAAAACGTCCATTCAG
GTCACTGGAACGGCCTCGCCAATTGTTGAAAACGTTTAAACTCAGCATTGCCAGATAGGT
GAAGAGAAACAAG
>NODE_23686_length_52_cov_45.192307
GTGAAGTCCTTTGAGCTGCTGTACAGATATGATGAAGAGATCGGCCATTTGATGTGGTAC
ATTCCGTTTTTCCTCTGCTTGT
>NODE_23689_length_31_cov_32.967743
TTTACTAAGTCTACACCAGTAAAAGGACAACGTGTTGGTTTGAATTGGTTGGTTTTAGTG
T
>NODE_23704_length_454_cov_22.524229
TGGTTACAGAGGCCACCCGACCCCCACACATCTGTGACCAATGCGCATGTAACGCGGTGT
GTGTCAACAACGCTTCATGTCAGTGCAACGCCAGCCACGCCGGGGATCCAACATTCCATT
GCTACGATACCAACAACATCTACTGCCACATCAAGAGTGACCCGATGCTCAGAACGTTCT
CCGAGCAACACTTCAAGCTAAGACAAACTGGGACATTCCTTCTCGTTAACACGACACTCG
ACAGACTCGCCAGGGGAGGTGGAAAGTGCGACATCGTGATCAACGTGACCCTGGCGACCA
TCTCCGGCCGGATCTACGCTAACGAACTAGAGTTTGAATTGGTTCAAAGGTCAAACGGAA
GGGTGCTGACGTTCAGAGTCAGAGTCACGGCGTTTATGGTCGGCAACGTCTTCGCCTGGA
ACATCTACTACCTCAACAGGGGCGACGACAACAACCCGTGGATCAGGATCAGGTCCGACG
ACCC
>NODE_23719_length_393_cov_6.923664
ATTATTTGGTGCGTCACTCAGTCCAACCACACACCAAACATGTCCTCTGAGAACTGTGAG
CCAATCCATCACATTTATGTTTGTGAAGCTCTAGATTTATTGAGCTGTGTATAGATTTGA
CCTAACTGCCATTAATACAGAAACTGATCATGTGTGTGGTAGTTNTGGTATCTAAGATGA
ATGACGTCAAATTCGACTACTATTTTACTATCTTGAACTGACCGTAAGTCGCCGAAAGAA
AGTACAGTTTCATCGTTCCTTTAGAATCCCGAGTAACTTTATTCGAGTAGTCACAGACGA
TTCCAGTGTGGGATTATAATCAAGTCTCCCTTCTACCTTACAGACTAACTGTGAATAACA
CAAAGGTTGACTAAAATATTACAATATAATTCTTTTATGTTCATATAAAAACAAGTTCTT
TTT
>NODE_23734_length_81_cov_69.827164
GTAAAGTTTCCCACTTATCTTAGATGAGATTGTGTTGTTTGGAACTATCAAAGAAGAAGA
ACCTGTCGCCAGCGGTCCTGTAGATGTAACGGTAGACCAGGTCTTTGCTGG
>NODE_23766_length_409_cov_17.826406
CAAAGACATCATGACGTTCTGGTTTGATGCTGGTGTGAGTGGTTTTCATATCCAAGGGCT
GGAATATCTTGTTGAGGATGCTGATCTTCGAAAAGAAGATGACCAAAAATTTATGTCGCG
AAATAATAGGGGTTCTCTAGATTTCCTTGAAGAGCTTAGGGTTATTGCAGACCAATACTC
TGATAAACCAGGACGAGAAAGACTGCTTTTTGGATCTGTGCTCAAGGCCAACAGAAACCA
AACCCAAGAATATTGGGGTACTGCTGAGACAAAGAAACTCCAAATTGTTGTGCCTGTTTT
GGACAAGTTGGATGATTTATGTAATGCTGCTTGTGTTAAATCTTTGACTGATGAGTTGAT
TGACAACACCACCCAACAGTGGCTTGGGTTGCAGCTGAGCAATGAATACGTTCAACGAGT
GGCTTCAAGGATGGACAGG
>NODE_23770_length_78_cov_71.500000
AAAATCATCAAGACTCAATGGTCCTTCTGCAAAATCCAATCATTTAGTTGAAACCATAAA
ATGGCTCTACTCTCGGGAGCAACTCTTTCCAAGCCTTGAACTTATTCA
>NODE_23791_length_31_cov_135.322586
TGAAGCAGGCGTTTCCTTGGGCCAGATTGTTTGTACAACCCCGACTTGTTCATTTTAGTC
T
>NODE_23830_length_202_cov_18.009901
TTGTCCTTGATGTATCATTTCCTAGATGAATTTCTTTTTCTGTTCTCTGCTGAGCCATTT
TTCATACCAAGGGTTGTTAAAATAACAGAGATGGACCTGGAGAATTTTAAGCTTAAGGTT
GTAGGGTATGGGGAACCATTTGACATATCTAAACACCCACAGGGCACAGAGGTCAAGGCC
ATAACATATTCCAACATGCAAGTGCATTCCGAAGATCGGAAGAGCGGTTCAG
>NODE_23831_length_101_cov_2.207921
AAGCACTTCTTGATAATCATAGTAACCAATGTTCGCTTTAAGCTGCGCAGCCACGCAGAT
AATCTGACCGCCGACTCACAGCAGTTTAAAATTAAAGCACACCAAATTTAGGAATATATT
GCACAAAAATA
>NODE_23832_length_81_cov_2.382716
AAAAAAATATTTTTAATTAAAATCTAACCAAGGTCCTTCATGACACCATTTGCTTTAATG
TGAAGTTAATGACCATGTCACTATCAATCTTCCCTCTGAGGTGCTAAGTAA
>NODE_23833_length_90_cov_30.788889
GGTTCCCAGGTGTTAAAATGAATAGTATTATTTCCTGTTCTCATATTCAATCACAGACAA
TGCCAATGTGGTTCCACACAGCTCAACAATTAGGGGCTGAGCCTATGAAAAAGAAAAAAA
>NODE_23852_length_123_cov_7.593496
TCTCTACTTCTTTAGCTAATTCATTCTCTATTTCTTTTGCGACATCATCCTGACAGCAAG
CCAATGTGGCAAGTACCAGAAGAGCAAGTGTTGTCGAAAGCGTGGACAGTTTCATGACAA
GCTTTTTCACTGCAGCCTCAACAAAGTCAAATA
>NODE_23881_length_49_cov_64.530609
GACCATAATAACGTGGTCAGTAAGGGAGAATTCGTGACAGTTTGGCGAGACCTGACCCAG
TACGACACAGAGATATCCG
>NODE_23915_length_117_cov_17.743589
ATGGAAGATTTCATCTCCCACCAGACAATCAGCTTTGATCCCTGTTGCTGTCAAGAGGAA
GAGAGTCGCCAAGCAGTGCAACACAGTGAAAGTGCTCATATCGGTTTTCTCTTATTTTTG
TTTTCACAGCTGGTCTTAGACAGTTGC
>NODE_24036_length_71_cov_1.098592
CTCGTTGCTCTTATTCACTCTACACGCCAACAGCATATATGACTCCGACTTGGTCTTTAT
GCCGCAGAAGTTGAAGACCTTCTTCTCTGTCGGATTGTAAA
>NODE_24054_length_32_cov_35.281250
GGATAACAGGGTAATATGCAGACTGGGCAAAGGAGAACTGTCAGAAGACGTGTAACCTGT
GC
>NODE_24061_length_59_cov_70.915253
TTGAGAGGCATGCCGAGGTGGACTACGATGTTGTCGAGATTCCAGTCGGCAGAGAGTACC
CCCTGCCCCCCAAGATCGTCCTGAAGAAG
>NODE_24066_length_130_cov_1.676923
TTAGAATGCATTCAATTGTTTTTGAGATTTTAGTGTGTCCATGCGCAAAGGGTTCAACAC
CCCGTAGGGAATATCGTTAAATCTTTGGTTCAGACTGCTCAAAGGGCCATTAAGTGTTGA
CAGTAAGCAAGTGAGTGTCTTGTGTTACATGTTGTTGATG
>NODE_24067_length_48_cov_3.770833
AACTGTACCACAAGACACTCACCAACAACTTTAACACAAGACACTCATCAACAACATGTA
ACACAAGACACTCACCAA
>NODE_24068_length_31_cov_8.451612
ATCCCGTACTTCTCTAGATATCATGATTGTGGCCATGTTTAACGCATTTTTAGAACAGAC
G
>NODE_24070_length_171_cov_51.631580
GTCTGGCTTACTACGAGATTTGTGACATAATCAGAGCGGGCGGTCATGTGACTTTTGACA
ACTCTCAGCGTAACCCCTACATCCTGCAGGGAAGTAACTGGATCGGTTATGACAACCAAC
AGAGTGTCAAGGAAAAGGCCTGTTATGCCGTCCAAAATGGCTACGGGGGTCTCATGTTCT
GGGAACTGAGCCTCGATGACT
>NODE_24113_length_32_cov_94.031250
CTATCGTAGCCTGGGCATTTGGCAGAAAGTATTCAGACATGGTGGACAAGTTGATCATCA
TG
>NODE_24114_length_90_cov_9.822222
AAATAGGGATAACAGGGTAATAACACACCAAATGTTTACACCCTGGACTACTTACTTTAT
CCTTTGCAATGCTTTGTGGGTCCAGTCACCTCAGGACTTCTTGAATTGAGCTCTGCTTGA
>NODE_24115_length_326_cov_64.009201
TAAAGCAGACCTTGTAAATAACCTGGGTACCATTGCCAAATCCGGAACAAAAGCTTTTAT
GGAAGCGCTCCAAGCAGGTGCAGACATATCTATGATTGGACAGTTTGGTGTAGGTTTCTA
CTCTGCTTACCTTATTGCAGATCGTGTTGTTGTTGATTCTAAACACAACGACGATGAACA
ATACACCTGGGAATCATCTGCTGGTGGATCCTTCACTGTGGCAATATCCAGAGCTGCACC
ATTGTCTAGAGGTACAAGAATCACATTATTCATGAAAGAAGATCAACTTGAGTACTTGGA
AGAGAAGAGAATTAAGGATGTTATTAAAAAGCACAGCCAATTCATTGGGTATCCCA
>NODE_24116_length_84_cov_62.773811
CGGCTGTGCTTTTTAATAACATCCTTAATTCTCTTCTCTTCCAAGTACTCAAGTTGATCT
TCTTTCATGAATAATGTGATTCTTGTACCTCTAGACAATGGTGCAGCTCTGGAT
>NODE_24129_length_58_cov_49.931034
CACACAGGAACGAATCGGGATCACTCAGTCATGCAGCCAACATGGCGATGGCGGCACTGG
TAGCAGCAGATGCTGGCATCAACCCAAC
>NODE_24130_length_154_cov_56.701298
TAGAATTCAACGAAACCTCCTTTCAAAAAAGATGGACGTGGCTTGCGAGGCGCTCCCTTT
CTACGGGGTGAGATTCCTCGTAAGTTGTCAGTGTCCTTTCATGAGTTCCCCGAGGATTTG
GAGAATCTCGTTGTAGCTGAGGTCACTGAAATATTGGGTCAAGGTCTGGTCATTCTCCTG
GGCT
>NODE_24132_length_39_cov_187.948715
CTTCACGCAGTCAACCACATTCTACACAACATGCTCACCACCAACGACGATGCCCGTTTC
TGGACACTG
>NODE_24140_length_34_cov_47.970589
TATCTACACTGTAGATGGCCAGCTATCACGGAACGGAGGCAAGTGTGCACAAACAGATGC
ACAG
>NODE_24199_length_165_cov_15.163636
GAGGCTTGTAGTTTTGACAACATGAAGAGGCTGGACGATGAGGGCAAGAAAGAGATGCCC
AAAAGGGGTGTTAGCGAGGACAAGGGTCACGGCAAAGTCACCATCTATAGAAAAGGAACC
ATTGGAGACTGGAAGAATGTGTTTACTGAAGAACAAAGACGACAGTTCGATGAGATCGGA
AGAGCGTCGTGTAGG
>NODE_24286_length_35_cov_453.799988
TGTACGTGTCTTCACCGGCCGATGCGAATAACACTCGTCTCGCTGTGATCTCGGTGACCA
GATGG
>NODE_24349_length_44_cov_116.227272
CGGACCCTTCCAATTGCTATGCCAGTTGTGAGGGAGATATGGCATGCGAGGACCTATGTC
GTATCACCCTGGAG
>NODE_24368_length_35_cov_1.200000
ACGTTAACTATATTTCGAAGTCAAAACACCAATCACAAATTAATAAAGTGACAACAGTTA
ATTTA
>NODE_24378_length_35_cov_192.828568
ATTTTTCTAAGTTTGGCCTTTCTAGTGGCCAGCACAGTTGCCGCACCTGCAAAAGAAATT
GTGAG
>NODE_24385_length_216_cov_85.370369
ATCTCTCTGCCACACTCAGCTCTAACTACAGCTACAGCTCTAACTACAGCTCTAACTACA
GCTACAGCTCGGCTTCACACGTATACATCATGGCCATAGCAGACAACTTCATCGGCGCCA
ACCTGGCCTCGAAGATCGCTCTCTTCCTCATCTTGTTGGCGGATGTGGTCAACTGGATTG
CATTTTGTACAACATCCTGGTACCTGGACAGTAACAACACCTTGTGGCACGGATTGTGGA
GGAAGT
>NODE_24390_length_185_cov_2.345946
TGGAAGTGTTGTATATGATCAGAGAGTCTATTGCAACCCTACTCAGTTTAAATCTCCTGT
TTCTTTTGTAATCCCTCCACCAACTCAGAATGTGAGACCAACTCTACCACAGCAGTCTTC
AACTCCTCAGCTGTATTTTATAAACAACACACCCCAACAACCAGGCATACAAATACAACA
GCTGCCACCAAAAACAGATCGGAAGAGCGTCGTGT
>NODE_24391_length_72_cov_37.513889
TTTCAGCCAATAGATTCTGATCCATGGGAACCTGACTGGAATAACCCACTGAAGCCACCA
GTTATTTCAAAGAGAGAAAATGGACTTGACTCAAGAGCATGG
>NODE_24419_length_205_cov_7.351220
TGTTAGCCGAGTGACGTCATGGGGAGGTGTGGATGCCGGCACAACTGGACACGACTACAG
CAATGACGTCATCGCCAGGGCTAAGTGGCTCCATGCCAACGGATGGAACTAATGTGTCTC
TTCTCTGTATGGGAGCTAGCCCACATCGCTCTATTAACCGAACGTTGTTTTTGTAAAAGG
GGACTTAATTTATAAATTATTTATTGTTGAAAAAAAAAAAAAAAAAAAAAAAAAA
>NODE_24420_length_90_cov_15.433333
TGAACACGTAAAAGCCGAATTCAATCGCTGGTGCTTGTTCGTGTTGTTTCGTTTGCTCAG
CGCATGCGTCGTGCCTCGCGCTCCTGCTCGAGAAGCATCAAGATGTCGCCCTCACGCACG
>NODE_24421_length_62_cov_2.370968
GGATCGCAACAGCCCCACATCGTCCATCACACACACCACAAACACCACCATCCACAAAAC
GCACAAGCCCACCACCATCCTCAACAACATCA
>NODE_24466_length_43_cov_27.488373
ATAATTTAACTTTAAGAACTTTTCCAAACTGTGAGAAATATTCAAAGAGCTGCTTTTCAA
AAAATCCATGTGG
>NODE_24467_length_39_cov_13.384615
AAAGAGCTGCTTTTCAAAAAATCCATGTGGCACATGTCCTATGTAGACAACTCCTGGCAA
ACGATCTTC
>NODE_24480_length_232_cov_6.073276
TCAATGTATCGAGTTCAGCGATAGCATCGTCGAATGCTTGTTTAGCCAAGTGACAGGCAC
GATCAGGTGCATTGAGAATTTCATAGTAGAAGACGGAAAAGTTCAGTGCAAGACCAAGAC
GAATGGGATGTGTTGGTTGCATTTGATTTTTCGCAATATCAAATGCATCGTTATATGCCC
GTTGTGATTCCTCGATGACTTTTTGTCGTTCATCGCCTGTGGCAACTTCAGCCAAATATC
GGTAGTAATCGCCTTTCATTTT
>NODE_24481_length_71_cov_1.774648
CTGGAACTGTACTCAACAGTTACCACAGTCTCCAGCACTGCTCCAGATGACATCCCTGAT
ATGCCACTCATGGAAGAACTTGATGTCATGCCCACACAGGA
>NODE_24482_length_31_cov_6.967742
GTGGATGGTTGTACCAAGTTCAGAGTAGCAGAGGGCGCTTCCAAGGGCAGAAACTCCCGC
C
>NODE_24483_length_233_cov_2.038627
ATTTTAAACAAATTGCTTGCTTGCCTGTTTGTCAGTCTGTATGACTAATTGATGTAATCT
ACCTTTAATGTAGTGTTTTACACCATTGATTGAATAACACATTTTTTCCCTCTACTTTTG
TTACATTATCAAGTTATTATATATTTTAAATGACAAAAACTATTGGTCATTGAGGTTTGA
TCAACACTTGTTCAATTCTAGCTTTCATTTACATTTTAATTAATTGACATAAAATGAAAA
GGGCCAGATTTATTTTTAAAAAA
>NODE_24491_length_66_cov_178.393936
TGTAAATAAAGAAGTGTTTATTGGACATGGATTCTACGAGATCATATATGAGTAGTGACG
TTATTTCTCGGCAATCTCTTGATTAAACAACGTCCT
>NODE_24594_length_107_cov_55.560749
CTGGACAAGGCGCTCCTGGGAGTCTACTCCCACCAGGAACAAATGGAGGCCGCGCTCAAC
AGATTGAAATTAGCCCGTGAGATGGAGATGGACACTGAACTTGAAGGGGAAGACAAAGAG
TTCTGGCTGAGATGGTA
>NODE_24605_length_44_cov_76.795456
AAAGGTCGCAGAATCCGTGAGCTGACATCTGTTGTTCAGAAACGATTTGGTTTTCCAGAG
GGAACTGTTGAGCT
>NODE_24613_length_36_cov_63.083332
ACAACCTGGCAAAACAGAAACACAGAACTGGGAGACAATCAGCCAGTCACATCTCGTGGA
GCTGAG
>NODE_24615_length_39_cov_35.615383
CATCTCGTGGAGCTGAGCGTTGTGGCACCACTAGGACAGGAACAGATTGGGGAGGACATG
AAGAACTTT
>NODE_24618_length_78_cov_140.807693
TCCTGTCCTAGTGGTGCCACAACGCTCAGCTCCACGAGATGTGACTGGCTGATTGTCTCC
CAGTTCTGTGTTTCTGTTTTGCCAGGTTGTATTAATCTGTAGATTTTA
>NODE_24650_length_52_cov_82.961540
TGGATTCAAGGTTTCAGGCTTTGCACTAGAGGGTGAGCGAATCAGTGCCTTTGTCTCAGT
GGAGTTGATTGACAACAACCAG
>NODE_24655_length_32_cov_33.656250
TTGGTGTCTGTGCTTTAGCTTTTGGTGTTGGTAACTTTGGGTTAGAAGCTAATTGAGATT
TT
>NODE_24659_length_41_cov_45.878048
CATCAAGCTGTGTGAAATAATAGCCGACTGTGTTGAGAATAAAATCATGCAGACCTTGAC
CTTGTCCAGTA
>NODE_24689_length_37_cov_282.594604
CTGCTGAGGGCAAGTTGAGGAGATTGTTGACACCCCCCGTGACCTCCCTGACCTCTGCCA
CCATTGT
>NODE_24707_length_185_cov_32.810810
CTAGCCTTACACAGACCCCAAGAGCCGTCCGTTCCAGCATCCTTGTTGTGGATGCAGCAT
TCTCCAGCGCCACAATCGTTGTGTTCGTCACAGGGGTTGTTGACATTCCCCATGCAGCTA
CACACTACACACGCCGTGATCAATGAAAGTAACCATGTTGACGCCATTTTATCTGATTGT
AGACTAAGTTGTCCAGATCGGAAGAGCGTCGTGTA
>NODE_24718_length_69_cov_45.797100
GGTCCCCCATAACTCTGACACAGTGACCTCGGTTAGGTACACCCGTCTCTGGACTGCCCA
CGTCGTCAATGCTGCACTCGTAACCATGGGGACAGACCA
>NODE_24719_length_95_cov_77.115791
TCAAGGCCAAGGTACTGTGCATCATCGAGACCCTGTCGTCCAACGCCTGCAAGACAACGG
CCCGCAGTCAGGCCAACACCAACAGTGACCCGGCCACCGCCTGTGGCACGTTGGAGACCT
TCAAG
>NODE_24741_length_31_cov_90.483871
GGCTTCCTCTTCTGCGGCCCTGGCGTTGTCGGGATGGGAACCTCCTCTGCCGTGCAGGTC
G
>NODE_24756_length_31_cov_12.806452
TGGTGTATGACCTGATGTATGACCTGGTCATTCAAGTGTTAGTTTAGCCGTCCACGTCCA
A
>NODE_24760_length_60_cov_61.400002
AAATGTTGGTGACACGTGGGCGTCCGCTTGTTTTGTTTACAGATGCGTCAAGATTGAGTC
AGACACAAGAGATCGGAAGAGCGGTTCAGC
>NODE_24768_length_274_cov_44.021896
CTCGGACTTGCCCTTCATTTTTTTTTTTTGATGTGTCACTAAGACGGAATGACCCATTAG
CCCCGGCGCCCCGTGTCCGTATGAGACTTCCAGCTTTAACACCAGCCTTTAGAGTTAGAT
ACAGCCGGCTCTTGACTGCTGTGAGATTTTCACCTAAGTTGTAGTAGGAAGTGATGTATT
TGAGAATTTCCTGACGTGATGAGCCTCCCCGTGCCTTGTATGCTTGAATAGCAGCAGCAA
TCATTTCTCTGTATTTAGGATGGTTGGTAGCACAGCTGGAGCAGGTTTCAGGCATGGTAC
CCCT
>NODE_24769_length_119_cov_109.672272
GAGGGTGCCCTGGAGGAGGGGGTAGAAACACTTAAGCCCCCCGAGGGAGCCGTCGCTGTT
CTTGCAGGCGGCGAAGTCTGTGAGCGCCTTCTCCCCGCAGGTGTCAACACAGATGCAGTT
GATGTCGAGATCGGAAGAGCGGTTCAGCA
>NODE_24790_length_45_cov_209.266663
CTGTGCTGGCCGCTACTTGCAGTGCCGCAGGACTTTGTGCCACCAACTGCAACGCCGTCT
GCGCAGTCCGAAAGC
>NODE_24879_length_32_cov_51.375000
TGCGATGAAGTACTTTCCTTTACTTTGCCACTGCTATCTTTAGGGCGACTAGAACTGCTA
CT
>NODE_24919_length_74_cov_262.608093
CTTTGACGGCGTTTAGCTTAGGCTCCGATGAAAAGCGCCAGACACCGGTCGCCCGTCCGG
CCTTCTCCGCTGGACTGACCAGTAGCATCAACGTGTCTGAGCAC
>NODE_24939_length_107_cov_60.514019
ATAGGCTAGGGATAACAGGGTAATGCAAAAATGCGATCTCTGAAGCCAAGCGACTTATTC
AAGATGCTGGAGTTGAGATTGTCAATGGAAATGATCGTGGTCGTGGTTGGTGAATTATTG
AACCTTTGATAGGCTGA
>NODE_24954_length_141_cov_2.744681
GCATGATATAGCATCATAACAATTATCAATTTCTTCTCTGAAGATAATGTGGTAAACTTT
ACGAACCCACTGAAAACTTAAGTTATTGTAGTTTTTTTTCCTAAAGCCAATCTGTCATGC
GACCTGTCATCTACTCATTTGATCCAGGGAGATCGGAAGAGCGTCGTGTAG
>NODE_24974_length_65_cov_244.861542
CCTCACGTGTTTTAAACCCACAGAGGACTGTGCTGTCACCGGACGTAAGAAGGACGGCCC
CAACAATCTGTACGAGCATATCTGTGCCCAGAAGT
>NODE_25091_length_129_cov_1.744186
TAATACTCTATACAAAATCTCTTGTTCAAACATTACTTGTAAATGAATACTTAAATTATC
AGAGATACAACAATTGATGTTGTCATTAATTTTTTTCCACTAAAATCTTGTGAAACCATA
TTTAAGATCTTTTCTTTAGTGATTGTTTTTGGAAGACCT
>NODE_25092_length_56_cov_5.750000
TTTTCTTTAGTGATTGTTTTTGGAAGACCTGTTATCTGGTTTATTATTTGACTCACCCAT
AGTCCAGAGATCGGAAGAGCGGTTCA
>NODE_25097_length_359_cov_20.094707
AAATAGGGATAACAGGGTAATTCAAAACTTCAAGTCGTTAACTAGTGTCGAGGTCATACA
GCCAACATAACAGTGAGAAAATGTTTGCTCGAGTCTTGAAATCCACACAATTCTGCTATG
TTTTTCGCAACAAATTTTCAACATCATCTAAGGTTGATGTAAAAGTAGCAGTGTTGGGAG
CTGCAGGTGGCATTGGTCAACCACTATCACTTCTGTTGAAGCAATCCCCTTTGATTTCAC
ACTTAGCTTTGTATGATATTGCACACACTCCTGGTGTTGCTGCTGACCTTAGTCACATAG
AAACAAGACCAAAAGTAACAGGTCATCTTGGAAGTGAACAGTTAGCAGAATGTGTGAAAG
GAGCAGGATCAGCAACTCTCTCCATGGCT
>NODE_25163_length_61_cov_42.147541
TCCATTATAAACCTCTGCGGGGAGGCTGTCCAGAGTGAGATTACAGGAGCGGATATTCGG
ATCGCTGTTAAAAATATCAACGAAGATCTTG
>NODE_25213_length_222_cov_12.855856
GAAATGATCGTCTGATAGTGACGTCATGCAGCCCGTCCTATAAAGGCAGACATGGCGAGG
TCCGTTAGGAAAACTTTGTGATATCTTTTAAAATGACATTTTGAGCTCTATTAGGGAAAC
GTGTTTATCTTACCCCNGAATATAAAAACCTGACACTAGTGAATGAGTTTTGCACGTCGA
TGAAATGTTAATTACAGCATTAATATGCGAAATTTGGTGGTCAACTTACTGTAAACAAAA
ACATGCTAGTAA
>NODE_25229_length_55_cov_12.163636
AAAATAGGGATAACAGGGTAATATAAATACTTCTTGATTCCACTGTCGTCTGCTTTAAAC
TGGCATTGGGACGAACCCAAGGGCC
>NODE_25282_length_63_cov_35.825397
GAATAAAATCTCTGGCTGCAAACGATTGTGCTCTAAGGGTTTAACTGATGTCTTAAATAA
ATTAAACATGAATCGACCATTTACTTCGTTAAG
>NODE_25283_length_63_cov_94.841270
CGAGGCGCCACAGGCGGCCTGTTTGAGGCTATTGAACTCATCGTTCGTACAAGCGTTGTT
CTGCAACAGACAGTCATGACTTGTGGTTCCCTG
>NODE_25326_length_36_cov_112.444443
GTTGGCGTTGCCAGCATAGAACTTGACGCGAGAACCCTTCTTCAGGACGATCTTGGGGGG
CAGGGG
>NODE_25329_length_42_cov_117.833336
GGCAAGATCTCCACCGACAATGCCGTTAAGGCCAAATTCACCTCCACCGACTACCAAGGT
AACGCTGTAGAG
>NODE_25358_length_85_cov_17.929411
GTTAGATACTCCTCAGCACCCTCAACTTTGCCAAGTTTCCATTTCCCGACGAACACTGCG
GCCATCTTGTATGATTGAGGCTTTGCCTTTAATCTCGGAGTCCTAAATGACGATG
>NODE_25365_length_43_cov_197.511627
AATTGTTCTTTCTCAACTCATACTCACGGACCTTAAGCCCCTTTTCCAAGATTTCCTCTG
CTTTAGCCCCACG
>NODE_25375_length_43_cov_31.162790
CTCAGCCACACCTCGAGATGCAACTTCCTTGACTGCTAGCACTAATCCCACAGACCCTAA
AAAGCCAAAGATA
>NODE_25377_length_115_cov_69.147827
CCAACAAAACAATGCGATATGATCAGAATCTCAAATTCATTGCCTCTTTTGCCTCAGTTG
AACAGTTTTGGAACATCTACAGTTATATAGTTAGACCAGCTGATATGACAGGGCATGTAG
ATTATCATTTGTTTAAAGAAGGAAT
>NODE_25418_length_36_cov_255.361115
TGGACCTCGTGAAGATTCCACTCGCATTGGTCGTGCTGGTACTGTCCGTCGTCAAGCTGT
TGACGT
>NODE_25419_length_92_cov_3.097826
CTGGAATCTGAAACTAGTAAGATAGATGAAAGGCTACTGCTGACTGAAGCTGAGCTGAAA
GAACTGGATGACCTCTTGAACTCAAGTGAAGATGAAGATCAACTTTAAATCTCTCCTACA
AA
>NODE_25421_length_81_cov_1.271605
CCTCAACCATCATCATCATCGACAACATCAACAGCCAATATTCGTGTTAATAGTATTCTA
CGTCTTACGACCATTTACGATGTCACTCGAACGGGTAAAGTCGTTGCCTAT
>NODE_25422_length_100_cov_281.570007
TACTCCTGTTGAGTGACGCGGTCGTTGTTGTTGCCGTCGATTTGGTCGAACAATATGTCG
TTATCGATCTTGTCGATGGTGTGGTCGTTGTTGAAATCCAGACCATCGAAGAGACTGGTC
AGGCCCCGGA
>NODE_25424_length_75_cov_69.253334
AGTCCAAGAACACATCCCAGTATCGCATGAAACGTTTCTGATTTGGTCATGTGAACAGGC
TCCGTCCAAGCATTCACCACAATAAATATGACCTAGGTTCAGCGT
>NODE_25472_length_45_cov_81.955559
TCTTGGCTCAGGCAGCAATGTGGATCTCTGTGTCATAACAAAAGATAAGGTGGAGTACAT
TCGACCCCATGAGAT
>NODE_25474_length_81_cov_6.185185
CGATTAGAACATTCGTCGTGTCATTATTCATTGCCATGGCTTTTTCCACAGGTGTTTGTT
CATCAATATCCTTCAACGACAGATCGGCTTTATACTTTAAGAGAGATCGAA
>NODE_25475_length_110_cov_2.190909
GTAAAATTATCTTTTATAAACAAATTGTAAAAAGTAAAAGTGATTCAAGTCATTTTTAAA
AATGGGAGAGAAAAAAAAGGAGTTGACTCTCAATGAACATTTTTAACCATCCTATTAGAC
AAGCAATAGCAAAGTCAACA
>NODE_25477_length_41_cov_8.463414
AGTCAACAAATAAGAATAAAACAGTTTCTTTTACTGTTTTCCATTGCCATTGATATTCAT
CTGCTTAAAAG
>NODE_25493_length_121_cov_4.834711
GGTCAATGTTTATTTGCAGTAATTATAAAGAATGCATTATAGTTGATACAAAAATAAGAA
TTGATAGAATTGACAAACTACATGTGTTGACAACAAACATTGCTGGCATTTTGTGCTTCT
GGTTTCAAACACTTCATCTATCCATATTAAA
>NODE_25501_length_97_cov_3.628866
CGAATGTATTAGCTATAGATGATAAAAGCTAACATGACTTGTTTTTTTTGGTCCATTTAA
TATGGATAGATGAAGTGTTTGAAACCAGAAGCACAAAATGCCAGCAATGAGATCGGAAGA
GCGTCGT
>NODE_25509_length_104_cov_45.413460
AATGATGAATCTTGTGGTGCTCAGGCTAATGATGCTATGGGCTTTTGCAACAAAAACTAT
GGCTTTTGGAATAAACAACCCTGACTACGATTATGGGGACCAAGACGATGGTGACGCTAG
AGCTGACTACAGTA
>NODE_25510_length_240_cov_71.345833
CCACCTCCACGTCTTGTTCATCGTTGTCTCTTGCCGTGGTCAAATTTTCAAACCGTTCAT
TCACGGCACACGATAAAAAGGCGGGCGGTACACGAGGTCTGTTTCTGTTGCGATTTTCAT
ATACAGACTGTGGTGGGGCCGGAGGAGGTTGAAAGTTTGCATCCCATGGCATTAACTGAA
CTGGCTCCAAAATTGACTCCTCTGACTTGGTCCCAGATGTTTCAGAGGGATCATCGTCAA
AGAAATCACCGTCGTCTGCGCCAAAATTTG
>NODE_25513_length_89_cov_49.359550
TTAGGTGCTTATGTTGACGATGAATTACCCGATTACATAATGGTCATGGTTGCCAACAAG
AAAAGCCGAGCCCAAATGAGCGGGGATCTGGCACTTTTTTTAGGCACAAATACTGATGC
>NODE_25514_length_67_cov_7.328358
CTGAGATACTTAGTCCGGTCTATCCCAGTGCATAAACTCTGTACTGCAATCACCGAACTT
ATAAATTTATTTTTCCTTAGCTGAAGCATCGACATGT
>NODE_25515_length_35_cov_79.142860
CCCGCAGATGTTTTGGCCTCGCAGTAGCCTCATGTAACCTTGCTCTCCCACGAGACACCC
CAAGA
>NODE_25613_length_36_cov_10.027778
CAAACAACATACAACAATAACGGGGAGGGGGAGGGAATCTGCACAAAGAGAGATGTAACT
ACAGAA
>NODE_25614_length_31_cov_2.967742
GCCTCGTCAGCTACAGGGATATAGTGCGGGCCACCGTCCCGTCCGTCTCCTTGTAATGTT
T
>NODE_25615_length_32_cov_104.937500
AAAGCAGATGATGTCCAGTTGGAGTTTGTCCGAATCGATCCTTTTGTTCGCACCACTCTG
AC
>NODE_25619_length_35_cov_60.085712
AAAAATAAATCTCATTCACGGGAAAATGACTTGAGTGACCAAATCGTTGTCAGAGATCTT
GGACT
>NODE_25651_length_325_cov_15.701538
ATTTTCTGCACCTACTCTTGCTACAGCAACACAAATGGAATTAGGTGTAAGATCTGAATT
TGTTTTCTTTTCATCTCGTCTGTTTTCAATTATTTCCAAAAGTTGTTGCACTGCCTGAGC
AGCACTTAAAAAACGAGGTGGCTCATAAATGGGACGCCCTCCGATGATTGTTCAACCATG
TCCCTGTCANAAAGTAAAATTATAGATCCTCTGTGTCACATACGTCTGGAGAAACATTCA
ACCGATTTTAGAACAGTATTTTCGAAAGTCCGAAGGTAAGTAGTCAGGTTTTATGATACC
TTTGTCAAAGTGGTATCAACATTTCGTCACGAAGGAAAGGTTGTCAATCTTAACT
>NODE_25697_length_71_cov_47.183098
AAAAAATCCAAGACAAGGAAGGCATTCCCCCAGATCAACAACGATTGATCTTTGCCGGCA
AACAATTGGAAGATGGACGCACTTTGTCTGACTACAACATC
>NODE_25756_length_33_cov_26.575758
GACTTGTGAGACCACATTTGCCACTGTGTACGCTGGTGCTTGAGTTGGTGCTTGAGTTGG
TGC
>NODE_25769_length_46_cov_76.652176
GGGACCCGAAGGGACACGTCACAGCACGTGAACTTGAAGCGACGGTCCTCGTATTTGTTG
TCATTGATACTCTCGA
>NODE_25774_length_45_cov_68.488892
GAGTCGGGAATTCCCACGTCTTGATGATGGCCTGGAAGATGAAGATGACCCGTCCAGTGC
TGGTGTCATGTCCAG
>NODE_25779_length_41_cov_58.658535
TCACACCAATACAGTCTCCATGGTACCATTCTTCACAATGGTCACAGCCTATCATAAACC
TCTCAACATCT
>NODE_25782_length_66_cov_82.621216
CAGTTTGTTCTAGTATGATAAGCTTCATATGGAGAATCAGCAAAATATTTTGGTTCCCTC
CACTTTGGTGTTACTAAAATGTCTAACAATTTGCAT
>NODE_25818_length_35_cov_7.571429
CATGTTACATCTCTGGTAAGGATTGTTTCATCACGGTGTACCTTGCATCCTCGTAACTGC
ATCTT
>NODE_25819_length_62_cov_5.435484
GTGTACCTTGCATCCTCGTAACTGCATCTTCTAGCAAATAGTGGCAAATGATTTAACAGG
GCGTGTTACTCCTTGTCTATGTAATGGTTTGG
>NODE_25829_length_36_cov_143.777771
AAATAAATAAACCGCATGTTGTTTAGCTGAACTCTAGCCTCGGTCTCTGCACCTCAAAAT
GTTTTC
>NODE_25837_length_35_cov_371.914276
ATCTTGGTTCAGTTGTATCAAATCTAAAGTGACTACGAACTTTCCATCATTGTCATCATT
GTTCG
>NODE_25838_length_31_cov_156.838715
CGAACTTTCCATCATTGTCATCATTGTTCGGTAAAAGAGGCGAGGATTTTCTCCAAGAAT
T
>NODE_25852_length_92_cov_3.282609
TTTGTCTTTTTGGGTGTGGATTTGTCTACACCAGCTTGAATCTGCTCAGTCTGTGCACCT
CCGTTTGATTGCTGAAGACAAGGTTCAAGCATGTTAGTAGGTTCTGATGTCATGTCAATA
TT
>NODE_25853_length_110_cov_8.636364
TTTGGCGGATGTAGATGGCGACGGTCATGTGGAGTTATTCGCCCCATCCTACGACGAAGG
CAGTGTCTATGTCTACCGCCTGTAAACTGTTAGTTCACTAAATAAAATATAATTTCCGAG
ATCGGAAGAGCGGTTCAGCA
>NODE_25888_length_86_cov_51.488373
CATGATGACTTAAAATGGGGAACTTAAGTAAGAGAAGACAAATATGGCAACAAATATTAC
CTAAATAATTATTACTTTTATGGAAGGAATAGATGGGTATCATTTCCACCATCAGT
>NODE_25921_length_67_cov_15.194030
GTTATGGTGCCTCTTTGCGTAAGCAAGTTAAGAAGATGGAGATTACCCAACACGCCACCT
ACACTTGCCAATTCTGCGGCAAGGACTCCGTTAAGCG
>NODE_25928_length_158_cov_28.563292
CAAGTACGACAACCACCGAAGAACCGGAGACTGCTCCGGAACCGGAACCGGAAGCAGAGG
AAACTCGCAAACCCATTAAAACAACCACTAAAAAACCTAAAAAGGGGGTTACTCGCAAGA
CCTTGGAGTTTGAGAAGTAATACTCGTTTTGAAAGTTGACGAAAGAGAAATGAACTAAAA
CAATTAAA
>NODE_25934_length_165_cov_70.933334
AGCTTTGGTTCCAAGATTGTGAACAGTGACAATGACTCAGGTGTTATCTTATCGGCAGAA
GCGACATTCCAATGTAAGACAGCCCGAGGAAATAATGCACATGGCCCAAGAATGCTAAAG
CCGGAGGCAAGTCGAAATCCAGTAGAGCTGTAGGCAGCAATATAATTGTGAGATTCATCT
TCCAGACAAATCATA
>NODE_25963_length_73_cov_145.534241
ATGAGCAGATAGCCTTCCATTCCCCAAGTGTTACCCCAGCTGTTCTTGATAATCCAGTAA
TCAACTTTGTCTTGGGTTCCATATCCAACAGCCAGAACACCAT
>NODE_26004_length_167_cov_21.964071
TACCATTAATGCTAAGCATGAAGAGAAACAAGACAACCATGGTTTTGTCTCTAGGGAAAT
AACACGCATTTACAAGCTACCAGAAGATGTTGATGCGAAGTCTGTGACATCAACCATGAA
TGCCCATGGTGTCCTTGCCATCAAAATTCAAAAGAAAGCATTGGAAGAACCAAAAGAGAT
CGGAAGAGCGGTTCAGC
>NODE_26025_length_141_cov_2.297872
GTCAAAGATTGCATTGAGAGCTAAGAATCCAAATGATGCCGACTCTGAATTGGACAATAA
CAATTGTGGTAAATTGGCCAACACTCCATACGGTCCATACTTTGATGGTGGTTTGGTTCA
AATGTGGGCCTCTGGTAAATTCTACTACATGTGTACCAGAAATAACAACTT
>NODE_26026_length_93_cov_5.279570
TTAGAACAACATGTTGAAAGCCAAAATCAAAACTGAGCTCAAAGCAACCATCCATGTGGT
CATTGATGATGGGGCAACAGCTGGAGCAGCAGAGAATTTACCATCTTCAACAATCATAAC
AGC
>NODE_26027_length_44_cov_78.931816
ATGGGTACAATTCCTTTTAGATTCTGTCTTTCCCATCTCTCGTACCAGGGTTTCGGATTT
AGTTTAACCTGGAG
>NODE_26028_length_31_cov_114.387100
CCAGGGTTTCGGATTTAGTTTAACCTGGAGGGTATTTACTGGGACCTCAGCGCCACGGGG
C
>NODE_26029_length_51_cov_30.274509
GTATTTACTGGGACCTCAGCGCCACGGGGCAGTGGCACAGGCTCCATGTCAAAGCTGAAC
GTGCTGTGCTCTTGTGGGCAG
>NODE_26031_length_435_cov_12.802299
CTCGTCTTCACGCTGCGTCTCCAGAGCTTCTCGTGCCTGACCCTGATCGGCGGCATCCAG
TACGTGGCGCTGACGAGGTTCTTCACCACGGCGATCGATCCCATCCAAGGTCAAGGCGAG
CACCACGTGGTCGTGGGCGTCAGGTACCTGACCAACACCGTGGAACAGCTGATCGTCAGC
TCCGCCGGCCAGCTGATTCTNGGCTAGGACCACGACAAAAAGCATAAGCCCGCGCACCGG
AAGAAGAAGCCCATGTCCCGGAGCATGAACTTCTCCTGGTGCCCGAAGTAACGCTGGAAG
CCGCGGTCGCACCGCGACACCCAACACCAGTAGAAGTTCCAGTAGAGTTCAGACGACGTC
ACTTCGTTACTGGTTGCCAGAGGTAAGGAAGGTGCTATCAAAGTAAAGTACAGAGTTGCA
ACTGTAACAAACACAAACGATAGCATCATTAATTTTAACGAGTCA
>NODE_26032_length_31_cov_83.161293
CTGAGACGAAATACCAGCGATTATGACGCGTGGCAATCAACGTGACCTTGCTCGTGAGAA
G
>NODE_26058_length_253_cov_2.474308
GGGAACGAGAGAAGATGTGACAACTGGTAAAAATGAATGTGTGGTGAAGGAACTAGATCT
AGGTGGGGAAGACACTTTCAACTCAGAGAGCAAGGATATTTGTTTGGGTGAGGTTAGTAG
TGATTCGTCTGACAGCAGTGACGACCAGAGAATAGAGCTCGAACACGACAAAGGAGAGAG
AAATACCACAACAGAAAACAGTCTTAAAAAGAAGAAGGGAACTGCAAGGGTCCCAGAATT
TTTGACAGCTCCCCAAACTTATCCCGTAAACGACCCCTTCTTT
>NODE_26085_length_200_cov_135.589996
ATTGAATTCTGTTTGTTTTGAATTAAAATTGTGTAACAGAACATCAGTCAGTGCTGGTTC
TTTAGTTGGCCTCCACCCAGTCCGCATACTCGGACACACGGGTGTAGACACTGGGCATGT
CACCGGTGCAAGAGGCGAGACCCCAGGAAGTAACACCAGCCAGCAGTTTAAAATCAGCGC
CACACATCAATGGGCCGCCACTGTCACCTTGGCAGGCACTGGGACGAGTT
>NODE_26127_length_86_cov_2.174419
GTTTACCCGAGATGACACGCGTTACAGCTTCTTACCACGTTTTTATTAACTCACTTTCGT
TCCTGTTTGTCTGTCCACAATTTTTCAAATTTGCCAACGTAAAATTAAACCACTTC
>NODE_26130_length_58_cov_121.724136
CTTCTTTTTCTCTTCTGCAGGAGCTTTAGCTGCTGGTGCAGCACCAGTAGAATTTCCTAC
ATTTGAAATTAAATCTTTGACGTTCAAT
>NODE_26149_length_169_cov_194.390533
GGTTCGGCATCAGCTGTCAATACAATGAACTCAGAGAGGCCCCTGTTTAGAGTTTTGGTA
GCCTCATTGGCACCCTTTTTCAGTTGCTTATAGTTAGCTGCCTGCTGTACCAACTCCAAA
ATTTGCTCAGTGAGCTTCTGATCAGCAAGGGGGTATGCTTTACTATTTACTTCTTCCGAA
TAGAGCGTGTCTATTTCTT
>NODE_26163_length_56_cov_117.375000
TATTAATTCTGCTAGCTGCTGTAGCTACCGGTCAGCTACACGAGTGTCCAGTGTGTACCG
ACGAGTACGATTACAAGTCTTGTACC
>NODE_26182_length_114_cov_5.412281
CCGCAATTCATGCTTCAAGGTGGTGACATCACCCGCCACAACGGCACCGGTGGCAAGAGC
ATCTACGGTGAGAAGTTCGCCGACGAAAACTTCAAGCTCAAACACACCAAGCCCGGTCTC
TTGTCCATGGCTAACGCTGGCCCG
>NODE_26221_length_254_cov_11.043307
GCTGTATGTTTTTCCACCTAGAAACGTGCAACTATATCTTAAGGTTCCGTTGTCACATTT
ATTTGCTGGAACAGTCAGATACCTTTGCCATACGTGTTCGCCAACTCCACGGTAGCTGCT
ACAATCCGGTCTTCGAGGACACTTCAATTCATAAGTAATAAATTGTGGCATGACCTCCCC
TTCATCCAGAATTATCTTTCCTGTGATGTTAAACATACCNCAACGTACAGCTAAACTTTT
TTGATAAAACGAAAGCATTTCACAATTGGATCTCGTTTTTATAT
>NODE_26244_length_158_cov_86.006332
ACCATCCCGTGATCGTTTGGAAGCATGTTAATCACTATTCTCCACTAAACCCGGGAAGTG
TTTGTTGTATACAGTGAAATTGAAAAATGACTGCGAAGCTGGTTGGCTTTGGGTACCCAC
TGCTGGACATCATCATTGACGACTCGGGTGAGCTGTTGAACAGATATGGACTTACACCCA
ATGGACAA
>NODE_26245_length_35_cov_109.142860
CTGAGCTACTTTAATGGCATTGATTGCAGACCCCCCTGGCACATACTGAATAGAATCTCC
ATAGG
>NODE_26257_length_111_cov_41.378380
CTGCGGCCGTGGCGTTCTCGTAAAATATGTCGATGGGTCGGAGAGTAATGGACTGGATAG
ACGTCACCTCCCGGAAGTCGGAAACTTTTCCGCTGTGTGAATGGGAGAGAATCATTGAGC
TGAGTTTCGTGAGGTTTAGCT
>NODE_26258_length_32_cov_32.062500
AAAAATAGGGATAACAGGGTAATATTAACCGCAGTTCGTGCTAAAGAGCTAGAAGATGAA
TG
>NODE_26260_length_46_cov_57.108696
AAAGAGCTAGAAGATGAATGCATACACCTTACTCTGGTTTACCTGGCTGTTGTGTCTTCA
TGTTACAGTCGACTCT
>NODE_26293_length_48_cov_6.270833
TTAGATTGTATTTCATTTAATAGCTAACTATATATCATATTAACAAACATGACCTTAACA
AAATATATATATAATAAT
>NODE_26294_length_102_cov_20.539215
GGCAAGCCAAGCGTGAATTCAACAATGATGCCACTTACAACTAAAAAAAATGATGCACGA
GTCCTCACAAGTAACTCTTTGGCGAATTGGGTCATTTTGGCTTCAGCGCTGGTGCTCTGC
AAACTTGTATCA
>NODE_26336_length_35_cov_77.400002
TCAGGTAGGACAACTCTTACAGAACAAGACTTAGAGATCAGGTGGTAGATTTCTTCAGAG
ATGAC
>NODE_26381_length_122_cov_148.663940
TGCACCAACACCAACAGCAACAACTGTCGCCTCAAGGACTTTGCCTTGAGACTTTTCAGG
TAGCATAATTCCACCTTTAGTCTTAAGCTCAGGGAGAAATCTTTCCACAAGTACTCTATC
AAACATAGGGATGAATTTCTTGAATCCTTGTG
>NODE_26401_length_616_cov_28.360390
CCGGTGTTTCGTGTCAAGTCTGGGCTTCGTATACTTGGATTCGTGGGAATATAGTATCAT
GTCTCAGTACTTCTTCAACAGTCTGTAACAGAACACCCTCCGCGGCGGGAACATGTGGCT
GCTTTGTTTCTTCTCCTTTACCCTTTGTTACAGCTACTGACTCATTTACTCTGTCACCTG
GCTTTTTACGCTGAAGAGTTTACGTTAGAAGTACTCTTACTGTTCGCAGCTCTGGGATAG
CTAATAGTACAGGTTACGCCGTGGGTCCTACGACTGAAGCAGGGCGGCGGACCGTTGAAG
GGGCAGTTTCTTCAGATCTGGTTGTGACTACCTCATCTCCTACCGTTTGAAGAAGACGCT
CTTCTTCTACCTCCGATACTCCTCCCACTCAGAACACATCAGTNCCGAAGCATATGAACC
TAAGCACCCTTATATCATAGTACAGAGTCATGAAGAAGTTGTCAGACATTGTCTTGTGGG
AGGCGCCGCCCTTGTACACCGACGAAACAAAGAAGAGGAAATGGGAAACAATGTCGATGA
CTGAGTAAATGAGACAGTGGACCGAAAAATGCGACTTCTCAAATGCAATCTTCATGAGAA
TGACAAGCGTCGAGACCCTATCGAGATCGGAAGAGCGTCGTGTAGG
>NODE_26421_length_119_cov_33.176472
AAGCCAAATGCCAAAACGTTTTGCACTGTCACCATTCTGGCCATTTTGGTCTCTTCATCC
ATTTTCTTTTTATCTTCATCAGCATCACCACCAGCTCTTTGCATTCGAATCATTTTCAAA
CAGTTCAACAGGAGTATGTGATTAGACGT
>NODE_26457_length_181_cov_20.276243
GGGTCGTAATGACGTGTAGGCATGTGTAGATGGACCCCGTAAAGGCTGCCTGGTTTGATA
GCTTTGGGGTTGGTGCTGGCATTAAGGGGGAAATCCTTGCCGCAGGGAGGGTTGGAGTTT
TGGAAGCAGTCGACAAGAGTTCGGTTACCAGTGACCAATCGCTGAGGAGGGTCCTCAATA
CACATGTGCGCAAGCGCAAAAGTTACCATCT
>NODE_26459_length_36_cov_20.500000
CAAGCTTATTTGCCGTTGCTATAGCTACCAAAGTGACCAACCAGATAAGTGGATACAATG
TTTGTA
>NODE_26461_length_81_cov_2.395062
CGCCAAGGTGAGTGCGCTCTCGGTCACCAAGGTTGGCTGCATGATCTGGTCGTCGATGGT
GTTGGAAACCACAAGACCGGTCTTACCGTTCAGACCGCAGTTCTTCTCTCC
>NODE_26483_length_31_cov_76.870964
GATGACATGTCATTTAGGCGTATTCCTGACCCTCTCCACCTTCTCCCTCCTCCTCGTCAA
A
>NODE_26484_length_112_cov_6.553571
AAAAAAATAGGGATAACAGGGTAATTTGCCATGTTATAGTACTTTGATCCTCCCCATGTC
TCCATACACAATGCCAAGAATGTAACTTTTCATGTCCAAGTTGTAATCAATAATGAACTC
TGGTAGATGGGCCCCAACAGCC
>NODE_26486_length_348_cov_23.390804
AATGAATAAGGAAAATATAGAATGTACAAATGGATCAGCAAGAGTTCGTTTGGCAAGTAC
AGATGTTTTAGTAGGTGTCAAAGTACAGCTCGTGCCTGTTGATGCTAACAAACCTAATGT
GGGGCGGATAGAATTTTTTTTAGATTGCTCCGCCAATGCAACACCTGCATTTGAGGGACG
TGGTGGGGAAGGCCTGGCATCAGAAATTACAGCAATGTTGACACGAGCNTAGTCTTTAAT
GTCGTTACAACTGTGCTCGAATGTCGACGGGGTCACGATAACTAATAGAAAGTGAGACAC
AGGAAGGTCCAGTCGTCACGACCGAAGAGATGTAACTGCAAGACGATGAACTCACACCTC
CTTTGAACAAACTACGAC
>NODE_26514_length_97_cov_5.896907
TTTTTTTAACCTGGATACGGGTGAACGGGGCGTCACATCTAGTGTAACACGTGGGGCGCC
CTCAGCCACAGCACCGCCTTGACTTCCTGTGTACATGTGGTCATCTCATGGTCAATACCT
ACATCCA
>NODE_26518_length_41_cov_158.195129
CGCCAAGAGCGATCCAGGCAAGGTACTCCGCTGTCCTAACGTCTGCTGACTGTCGTTTGA
TCCTTGAACTG
>NODE_26527_length_56_cov_44.392857
CCTTGGAAATGGCTCCAGCAAAAGCCTTCTGTTCATAAGGTGAGAGACTGTAGGTGATTA
CACCACGTATGTTAGTCGCCATGTTT
>NODE_26528_length_48_cov_14.416667
ATTACACCACGTATGTTAGTCGCCATGTTTCCCCATTTCATTCCCATTTTCAGAGAGTTT
GAGTAACAGCAGGTTAGA
>NODE_26531_length_76_cov_8.013158
GTAACAGCAGGTTAGAAAGAAAATTAACAAATGTGCGACTGTCCTTCTAACTCAAAGGTT
AGTGTAGTGACGGTAAGTGACATTACCCAGATCGGAAGAGCGTCGT
>NODE_26532_length_229_cov_5.493450
ACTTCACTCTCAATCAGACTGGATCTGATTAGTCTCTTGGGCCGGCTTCACTCATTCTCT
TCCGTGCGCAGGCGAGCGCTACCATTGGTTAGCTTGATAGCCAGNNNNNNNNGTACACCG
CCCAGAATCGTAACGAGGGCATTGGTTAGCAACCGTAAGCGGAAACTGGGAACTTCGCAG
ACGCGTGAGCCAACAGTTAAGGAAAACCAAACGCGGTCAAGCCGAAGTCGAACGCTATTG
CTAGGCTGACTACAGCTCA
>NODE_26534_length_31_cov_70.483871
CAGTCGTGTCAGCACTAGGCAACCCGTCAGGGACCTTCATACCCTGCGACATTTACTCCA
C
>NODE_26556_length_36_cov_126.250000
AAAAAAAACACTATCGTTGGAGGATACACTTGATGCTAAGATGGCGCTTCCAGTGAGTTA
CCTTCT
>NODE_26557_length_120_cov_8.541667
CAGGCCAGGCGTGCGGCGACAACCCGCTCAGACGTTATGAGGTTGTCATCAAGAAAATAA
ACGAGAGGTACCCGGATAAAGGAGCTATGACCCTACTCAACCTGCTGATGGACTCTAACC
CTGCCGTTTTCAAACCTCTGCTGAACGAAT
>NODE_26613_length_148_cov_2.391892
CGGGGCTTCAGGATGGTTGTTAATGACATGCATGTCTCACTTACAGGCAAAGTTGTCCTT
TTGGCAGTACGAGCCATACGTTGCATATTCTCCATAGGTCGAAACATTCTAATTCTGTTA
TCTATGCACCTGTAGGCTTTCATTCCCTCAAAGAGCTCACTTGCATAGTGCAACACTT
>NODE_26633_length_76_cov_1.289474
CAGGTGTTTGAGTGTGAATCAAAGGGTGACCCTCATTACACCACTCCTGATGGCACCAGA
ATTGATTTCCAAGGAACATGCACATACAATCTGGCATCAACGTGTA
>NODE_26634_length_131_cov_4.274809
AAAAATTCAGGTCGCTGAGTTCAAACATCTTTATATGTTGTAGTTGTGCACGAAAAGAAA
TGAAATTCTAACTTTGTTTAAACAGGTCATAGAGATTTTGAGACATAACCTCAAAACATC
ACTACGTGACATAAGACGTCGTAGCAAAATATCACTAAGTG
>NODE_26649_length_43_cov_48.860466
ATGATGCGGCACAAGGGACTGGCATAAGCCACAGTCACCAGATAACAGTATTACCCAGTC
CAACTCAACAACA
>NODE_26651_length_63_cov_4.111111
AAACCAGAAAGAAACAACAGCTTAAGGTCAAGAAAGAACAAAAGAACAAAATGAAAAACA
TCGAACAATACTGAAGACTTTGAAAAAGTCTCT
>NODE_26654_length_36_cov_45.666668
AGACTGCTTGATTGGCAAGTTCATGCATCTTGTTCGTCCACTTGTAGGACTGAAGCAACT
GAGAAT
>NODE_26655_length_127_cov_138.968506
TTTTTTATAAACACAATAAACGAATGCCTTCTCGGCCGACTCTTTCGTTTCCTTCCATCT
TCGGTGATTCACTGATCCCATCCAATATATTTATTTGCCCGCGTTCAGCAATGCAGGGCC
GATAAAACCGGTGGCGTAGGACAACAGCAACTTGGGA
>NODE_26657_length_152_cov_96.361839
ATAGGTACACAGATCTGCACTTCTGCCTGTGACGTGGTCTGTGGGTGCGCTGACAAGTGT
TTGCCTGCCGCCACCGAGCAGTTCCTCAAGTGCCGGGGAGAGAAGGTCACGGACATCCTT
CTGGCCACGGGCTGCGAGGGTCTCTACATCAACTCCGTGCTCCTCTGCTCCGGTCAGTGC
GG
>NODE_26659_length_31_cov_4.483871
TTTTGGGGATAAACTGATATGGGTAATGAACATTTGTACTGTAAATAAACATTGGTGTGT
T
>NODE_26664_length_31_cov_53.548386
CCTTCTACCCCTTGTCATATAGTGTCGCCACAAACACTGCCTCTTTCTGAAAGATCATCT
C
>NODE_26665_length_57_cov_107.105263
TTCAAACATGGTCGTCGGTCAAGGAAAGGCAGGAAAGGGAGTCGGCAAGGGCATCGGCAA
GATCGCCGCCAAGAGAACCTCCAGAAA
>NODE_26724_length_180_cov_102.449997
AGCCAAGTAGGAAAATAAAGCAGGAATTTTGCCCAATAACCCACAAGCCCCTAACTGCAC
AGAGGGCTACATGCTGCTGATGTTAGGATGGGTTGTGGTAGCTACACTGCTGTACCTTCT
CAGGCCTAAAACTCTGAGATTGAGGGGAGATGAGAAGCCTGCACCATCATCAGGGGATGG
ATCTTCTAGATCGGAAGAGCGGTTCAGCAG
>NODE_26739_length_92_cov_47.532608
TGATCGCCTTGTGTCTTGGAGAACACAAAGCGAATCTCATGCTCCTACTCGGCTTTGAGC
ACGGGACAATCGAACTGGCCATAGGTAACGCGAAAGGAAGAGAGACCAACTGGTACACTA
TG
>NODE_26776_length_39_cov_20.461538
GAGTTTTGCTCTGGAAGTGTAGGCAAACCACCAAACCACAATGGCTGAGATCGGAAGAGC
GGTTCAGCA
>NODE_26777_length_95_cov_2.136842
CGGCGAACCAGACTTTAGATCTTCACGCACCTTGAAAAATCGCTTATTTTTCTTACGAAA
CAAAAGGTTTAAAAAGATTATTTTAAACGTATTGTAAAGATGAGGATCCCAGGGCTTCTC
AATAC
>NODE_26800_length_110_cov_40.118183
GTGGTCAGGGAGCTTTCCCATTGGTCCATGCCATCAGTGACGAATGTGGTGCCGCACCCC
AGGGCCCGAGCGTGACTTTTGCTCCAGTTGTAACTCAAAAGCCTGTTGGGGTTGTCACAC
AAGCGCCCGTGGTGACACAA
>NODE_26815_length_107_cov_1.495327
TGAAAACGTTCACCTCGTTGACGTTTTTTATCTTGTTGATCTTCCGCTGATTCACTGCCA
ACACCAAATCGTTCCGAACGTCGTTTTTTTGCTGCATCTTCAAGAGCTTCGTGTGGTGTA
CCAAAACGTAATGCACG
>NODE_26819_length_382_cov_13.958116
AAGTTATTCTTCGTTGAAATAATTGTTATTGTAAGGTTGGTCGTTCAGTACGGATATAAC
TCTAGTTCTTTAATACAGACACAAACATTTTTATAGTGTTATTAAAATTTTTGGTCAGTA
TTGTGACTGATAGATATCTATGCCTCTACCGCACGGAGGCTGTAGCTGAACACACTCATC
TGGCAGAATCATGCTGGTTATGTTCTCCACGCTGCTGCTACTGATGCTGACCGTCGCCAT
GACGACGGTGGATGCGCAGTTCGGGTACTGTGCCGGAAGGTACGCCGTCTGCGNCCAGAC
GTATGGTAGGCAACGGATGAGCTCGGAGACGATGGGAATGAGGCTCATGGATCGCGTATA
GTTGAGAGTCTTCTGTTGCTTTGGAGGATTCCATACGCGGCCCGACATGGTC
>NODE_26931_length_71_cov_6.492958
AAAAAACAGCTTGAACTAAAAATGCACAGCTCTAGTTATGGGCCAGGTTTCTATTTCACA
CAAACATTGAATTTTAACTTTACACTACAGGAGCAGGCCAG
>NODE_26933_length_46_cov_7.630435
TGAGACATCTGTTTATTTAAATCCAAACAGCACCTGGCCTGCTCCTGTAGTGTAAAGTTA
AAATTCAATGTTTGTG
>NODE_26936_length_43_cov_3.534884
AAAATTCAATGTTTGTGTGAAATAGAAACCTGGCCCATAACTAGAGCTGTGAGATCGGAA
GAGCGGTTCAGCA
>NODE_26959_length_33_cov_90.090912
TTGAGCGGCGGCCAATAATTCATGCAACTTCATCCCTGTCCATTCCTTTATATTGTCCAG
TCA
>NODE_26960_length_75_cov_43.013332
TGTGTGTGGGCTGGGTGTGATGGACGTCTCTCAAATAAATGCCACATCTTTCAAATTGTC
TCTGGATGTCATTGGCCAGTCAACCTCATGCACTCCACAACAACG
>NODE_26961_length_65_cov_69.892311
CTGGATGACTTTAGGTGCAATCAATGCCAACTGCCTAGTGGTCAGCAGCCTGAGATTTTC
TTCACTTAATTCACCAATCAGATGTCCCAGGTCTC
>NODE_27069_length_63_cov_98.317459
GAACTACTTTTCGTTCAAAACTTCATTTTGGCCAACACCGTCGCGGGCCAGAAAATGGTC
AGGGTCGGAGGCACGGACGAGGGCCACGAGGGA
>NODE_27072_length_99_cov_92.202019
AACAATTTCTGTGTTGCTGGAGTGCCGGTACGTCATATGCCACGTCAGCGTTAGAGGCTG
CCACACCTCCGTTTGCCTTGCCTGTAGGTTGTAGCTGGTTGATGTCGTAGTCGAGGGCGT
ACACACCAC
>NODE_27091_length_37_cov_8.081081
GTTTTCAAGGAAATGCCTTCGGTTCTGTCTTGAAATTTGAAACCAATCCAATGGTGATAC
ACCAGAT
>NODE_27112_length_112_cov_27.303572
ATTCCCGCCTGTACTCTGCTCGCCTGTGGGATCTACTGCCCATTCGGGATGAAACCTTCA
ACAAACGGATGTCCGTCTTGTGCCTGTAACCAGGATCCATTTCTGTTATTGACCCTGTGA
TAACAGATCCCTGGCCCAAACA
>NODE_27129_length_208_cov_3.004808
GCGGAGATGAGCATGTTACAGAGGTGGTCAGGGGAGATAAGTTGATTAATAGGAGTGAGG
GAGGGGGAGGATTAAAGGAGTCAAAACAAACAGACAAAAAATTTTTTTAGAGTTTTCTTT
AAGAGTAAATTATTTCCATAAAACCAATTCCACTAAGAAAGTATGAACAGATTAGTAGAT
CTAGTTAAGCAATCAATACAGCCACAGCTCTAGTTAGGTAATCAATACAGCCACAGGT
>NODE_27139_length_49_cov_23.244898
TGGACACCCTCCACAGTTGTCCTTGACCGTGGTGGTAGGTGGCATTGTAGTGGTGTAAGG
AGCCTGTCTATCTTGTCTG
>NODE_27204_length_74_cov_3.729730
AAATGAAAGGCTTGATCCCACCAATTCCAATAGGAGTAACTGGGTCCAAGCACTCGTTGA
TATCCACCGAGCAGCTGGGACCAGACCAACCTTGTTTACACAGA
>NODE_27232_length_40_cov_4.900000
CTGGCTATTGTCTTTGTGGTATCGTGGGTCGACAGTGGTGCATCCGTTTGGCATAGAGGT
ATGCGTATTA
>NODE_27278_length_754_cov_10.614058
AAAAAAATAGGGATAACAGGGGTAATAATGTGAAGGAATCAGCCACATTTGTGAACAGGA
GATCCTTCTACCCCAACCCTTGAGCTAGCCACACCCCAACAAGGATCAGGGTATTTACCC
AACTAGGCGTGCAGTGGCATAAGAAACTATGGGTGAAAAGATTGTCCTCGTCCTGTCGTT
GCTGTTGATAGTGTCTGAGATTTGTCTCCAGTCCTGGGCTAAAAAGGAGAATATTGTGAA
TATGTCTATGGATGGTTTTGACAATAATACAGGTCATGCCATTAACTGTGGCACAGTGCC
TATCAAACTTTCCTGGACACCAAAAGACTTATCACCGTCAGGAGANGACAGCAACGACAA
CTATCACAGACTCTAAACAGAGGTCAGGACCCGATTTTTCCTCTTATAACACTTATACAG
ATACCTACCAAAACTGTTATTATGTCCAGTACGGTAATTGACACCGTGTCACGGATAGTT
TGAAAGGACCTGTGGTTTTCTGAATAGTGGCAGTCCTCTACAGTTCTAATGTGAATCGAT
GCTTCAGGGAGTAAATGACCTGTCACCAAAGAAATTGCGTTCAGAAATAAAGGTGCCTCT
GCTTTCGGGGAAGGAGCCGATACGACTGTTGAAACTGACATCGTGTTACTTCGTCATACC
CTATGGTACAGGTAAATTTCTTCCGAACTTTAAGTGTAAAAGGTTTTGGTAAAGGTTAGA
GGTACACGACTGTTCGATAGGTCCAATAATGCTACGACAACATGTTCAAACCTTGTCATT
TAAG
>NODE_27283_length_235_cov_46.131916
CACTACCTGCAAAACAACCCCGGTGAGCTGCCTCGTGTTATTTGTATAGCTGTTGCTGGC
ATGGGTGGTGTTGTCTTAGGTTACAGAGGTGGATCCATACGGAAGGTGACCTACGGAACC
ATTGCCGGACTTTCGTGTGCAGCATTGTGTTATCCTAAGAAAAGTGTTGAATTGACACAC
GAGATAGCTGAATTTTTCAAGTCATCCTGGAAAGAAAATGTTGGAGAAGATGTTGTGAGC
AAGATTTGGCCCTTTCCTAAAAAAG
>NODE_27331_length_33_cov_21.515152
AGATCGGGAAACTTGGACACGTCCTCTAGTCCTTTGGTCACTATTTCAATACCATCAAAA
TCC
>NODE_27408_length_32_cov_234.187500
ATCAGCTTTTCAGCATGCTCCCTCTCCTCATCGGATTGATGCTTGAAAAACTTGTGGAAG
CC
>NODE_27409_length_140_cov_18.621429
TGGCAGGTTTATTAGTGATGATCACATAGGCTAGGAAGTAGGGCCGGTCATAGACCACTG
CAACCAATGCCGCCGCAGTGGTCCCCACACTTTCAATAGCGTGGGGCCTATCTTAAACTT
CTCTTATTGGTAGGCTGAATGAAACTTGTGAACGCTGCTTCACTTGCCCC
>NODE_27417_length_503_cov_5.421471
AAAAACCAGGATGTCTTTGCTTCACTAGCTCCTCACTTTCCGTATTGATGATAGAATTGA
CGCAGTGATCGTGGTGTCATGCTTAAAAACTTGAGATCCCTCTCTAGGATGTTCTGCCAT
CCAAGGCCAANTGGTCATACAGAAACGAAGTGATCGAGGAGTGAAAGGCATAACTACTAT
CTTAACTGCGTCACTAGCACCACAGTACGAATTTTTGAACTCTAGGGAGAGATCCTACAA
GACGGTAGGTTCCGGTTGCAAAGGGTAGGTCGATTCTGATAACAATAAAAAAAGATAATA
GAACAAACGACACTACTCCCTCAAACGGAGTTACTTTAAACGGAGGTGTAATTGAGTTGT
GCTTTATACTCACACACGGACCACACACTTCCCTGGACAGTTTAGACTGGTCAAAGAGTT
ATAAACAACAACCCCTCACCCCCTCCCCCTCGAGACTCCAACCGCTCACACTGTATATTC
TGTCATTAAATCAAACCATTACAGAATTTTCTTCTCAATACTGAACTTTTTTT
>NODE_27426_length_346_cov_23.323700
AAAAGATGGACCTCAACAGATTTCTTTTACTCGCAATGATGCTTGAAAGTGAAAGTTGAC
CGGACGGGAATAGAATATCCAGTGGATTGACAATGGACTGCACGCGCTTTTTGCTTCCAA
CGAGATACGGGATATCCACAAAGATATCATGCCAAAGAGCATCGGTGAAGATTGCCGCCA
CACGATCAGGGTCTGTGTTTGTCGATCTTTTCCCGATAAGTTGCAACAAATTAGTGTAGT
TGAAAATAATTGGAATAGGGTCGTAAAGAGGGTCGTTCTTAGGGTCGAAGTGAATGTTCT
TCTTTCCCAAGGTGTGAATCCACTCATTGTTCGGTAAAATGGGATCCTCAGCAAATGTCC
CCACGACAAGTGCAGT
>NODE_27434_length_84_cov_44.226189
CCTATTCCAATTATTTTCAACTACACTAATTTGTTGCAACTTATCGGGAAAAGATCGACA
AACACAGACCCTGATCGTGTGGCGGCAATCTTCACCGATGCTCTTTGGCATGAT
>NODE_27436_length_35_cov_61.257141
TGAAGTTCCTTTTCAACATTGGACTTTGTGGGAAGCACCGCCACTTGTAGCTTGACATCC
TCTTC
>NODE_27445_length_46_cov_134.586960
GTCTTGTGAACGGAGCCAATCTGAAGAGTCTGTCTCACGTTCGATTAAAGATAAACAATG
AAGACTTAGAATTTTT
>NODE_27463_length_59_cov_80.067795
TATTGACATGTTGTCCCCATCGTTGCAGCAGTAGACTACGCCGTTGATGAAGCTGAAGCT
CTTGGTCTAAGTTATTTATAACGATGTTT
>NODE_27477_length_40_cov_140.800003
TCACCGCCACGGTGTACGGGGATATTTGTTGTGTGCCCAACCAGTTCGAGGCGAATTTGA
TCTATGACAA
>NODE_27478_length_31_cov_4.129032
AAACCAGTGCCATCCAGTACAAACCAGTGCAATCCAGTACAAACCAGTGCCATCCAGCAC
T
>NODE_27497_length_95_cov_76.389473
CCCCGACTGCTGAGAGACGAGATCAACCTGCTCGACCTTCACCGCCCCGGGCACGGCCAC
CAGGGTGAATCTGAAGTTGTTGCTGCTGGCCTGGATGCCGGTACAAAGAGTGGTCAGCTG
CGCTT
>NODE_27500_length_145_cov_36.027588
CAGTTGAGTCGCCAGCTGCGTACGCTGGTGGGCACCTACGACCTGTCCTGTACAGCTACC
TCACCGTGCCAACAAAACCTCCCCACTTTCCGGGTTGACTGCCAACCACTCGCAGGTTGA
GTGCCTCTTGGAGTTGGCCCACACGAGACCGACACGTGAGCAAGACACGTGACCC
>NODE_27519_length_56_cov_119.053574
ATTACAGAACAAGCAATGACTGGTCTACTGACACCACAGGCTCTTCCAAGTGCTTGTTTT
GACCTTACAAAAATGTAGGGAACATT
>NODE_27527_length_374_cov_9.128343
GCAAGACCCATTCATAACAGTAATAGTTACCTAAATGTTATTAATGTTGTGAAAAATTAA
AGATTAAGATTACCTAAAGATTTTCCTTGATTGGAATTGTAATGGCTACAAAANAAAGAG
TAGTCGTAGACTAAGATAACTGTTGATATATGTTTTAAACTGACTTCTGTGTTGTTTTAG
AGTTTGTCACACCGGTCTATTTGACAATCCAGGGAACCCTGGTGTTCTATTTGCTAAAGG
AGAGGGTCCGTCTTATCCTGGGACACAATTAAGTTCTGTTGATTTAGTTTATTTATGGTT
TCTCCACCACGGAAGGGAAAGTCTCGAACTACGGTATAATGGTCGTCGAGGTAAGGTTTC
TGTGTAACTATGTTGACTTGTTAAAAATTGCAGTTAACTACTCT
>NODE_27543_length_78_cov_44.423077
AGGTCTCAGGAAGCTATGGTTAGACACGAAGCAGGTGAGGCTTTAGGGGCCATTGGAGAT
TTTTCAGCGCTTGAGGTTCTGAAAACTTTTATTGATGATCCCATTGTG
>NODE_27567_length_76_cov_106.105263
CAACCCTACCATGACGTCCTCGCCGTACTTATCGCCGCTTTCTGCTGCTGGTGTTTCTCT
ACGACCAACGCTGCGGCGATCCTGTACCCATTGGCCCCTATTAGTG
>NODE_27583_length_36_cov_158.611115
CCCCGACTCCCGCAACCACCCTGTCCAGCCACCGCCCTTCAAACCTGTCCACCATCACGT
CATTCA
>NODE_27587_length_158_cov_3.708861
CAGACGACAAGATGGACACCACCTACTTTGACCCTAAAAACTCAGCCAGAGGTTTAGTGC
TGTCAGCAGTGGACTTATGATAGGACCCCTTTCTGATGAATGTTTGACAAGCAAGAAATT
GTGATGGAAGCCCCTCCCTAAAGCCACTTGAATCGCTGTGACAGACAGGCTTTGTCTCCG
CCAACTGT
>NODE_27588_length_459_cov_4.074074
CAAATTCTTAAATACGGCCCATATAAATATTAAATGTATAGGACCGATTTCCTACTACAA
AGACTGAAAAACATCGACTTTTAAGAACACCCCGGAACCAGTCACTATGTGATAAGTTCT
TTTTACAGACTTGTGGCAAGTTCCACATACGACCAAAACGTTATGTGTGGTTTTAGGCGT
TATCGTAAGATGAACAGTTGGCGAAGACAAAGCCTGTCTGTCACAGCGATTCAAGTGGCT
TTAGGGAGGGGCTTCCATCACAATTTCTTGCTTGTCAAACATTCATCAGAAAGGGGTCCT
ATCATAAGTCCACTGCTGACAGCACTAAACCTCTGGCTGAGTTTTTAGGGTCAAAGTAGG
TGGTGTCCATCTTGTCGTCTGGTGCTGCCACAAAAGCAGGTTCCATGTTGATCAAGTTGG
CCCAATCAATGGTAGAGAAGAAGGACATGGCCTTGACATCTGGGAAACCTGCTTCATCTG
CTGAGCAGT
>NODE_27600_length_167_cov_36.940121
AAATAGGGATAACAGGGTAATAAATCCTAAGTAAATGGCAGGAAAACCTGACTTCACCAA
GCTCGAAATCCTCACTTGCAAGTTCTGCGGTGGTGAAGGTACCCCAAAGACATTCTCCCA
GAAGACTGGTAAGTTGGGTGTCCAGGTCAAGCAGATCGACGAAGAATTGAAGAAGCAAGC
CGCCGACTTCAAGGGCA
>NODE_27601_length_42_cov_24.738094
AAGTCAGACAGTATACAGATTATTCCAACAGTACAAAATAATATTGAAGTTTTATGGACC
AAATCAGCCTGT
>NODE_27602_length_46_cov_35.804348
CAATATTATTTTGTACTGTTGGAATAATCTGTATACTGTCTGACTTCATGTACTTTGTGT
TACAATCACTTAAACT
>NODE_27647_length_97_cov_1.618557
CCACCACACTGACTTATTAAAACAAATACTAAAAAAACCGAAACAGCACGCGTCTTAATT
ATCAACATAATCTTATTTTTTAAACGAGTTTTCAGCAAGGTGCAGGAGATCGGAAGAGCG
GTTCAGC
>NODE_27668_length_93_cov_323.720428
CCACAGTTTGCGCCACACCACTGCTTGTCTCCGCCGTTATCGAAGAATTTCTGGTTGGGG
GCGGTCACCAAGTTCTGTACGTTCCAGGCGAACGGTGTGTCTGAGTTTGGGGGTCCACAG
CCA
>NODE_27669_length_151_cov_33.026489
GTTTTCTCAATCATGGAAGTCGCAGGAAAAACACCTGCCAGTTGACGGCCAGAGAGAGGT
TCCCTGGTTTGTTCCTCAGCAGAGAGAAGGTCATGTGTATCCTCGTGGACCCGGACGGCC
TGTCAGAGGACAGCTACCGAATCAGCGATGTCCAGCTCCGTGTGCCCTTCAACCCGAAGG
C
>NODE_27688_length_31_cov_38.709679
AGCCAATACCTGCAGCAACATCCAAGCCCTTGTCTACAGTTTCAGCCACTCACGGCCTCA
C
>NODE_27690_length_35_cov_9.285714
CACTCACGGCCTCACAGGGGCGGAAAAGCGTGTAGCCAATCTGAAACAGTGGTGCAAACA
GCAGC
>NODE_27691_length_90_cov_28.922222
AAACTATCTCATCATAATTTTAGTAGTGTTGTTATCCAAATCCTCAAATATTTTCTAACA
AAAATTTGTTATGGGCGTCACAGACAGCTGATAACATAATTGTCTCACCAATGACAGTTG
>NODE_27720_length_36_cov_24.333334
AAAAAGGCTTGCATATTTATCTATTTGTATAACAGTTAACTAAGATCGGAAGAGCGGTTC
AGCAGG
>NODE_27722_length_34_cov_201.382355
TTGGAATCATCACCTGTTTCCTCAATTGAAGATGATTCATCTGACTCTGGTTTGCGAGGT
GTTC
>NODE_27724_length_42_cov_79.500000
CATCTGACTCTGGTTTGCGAGGTGTTCCAGTGACCAAAGTGTCAACTTCACAGATCGGAA
GAGCGGTTCAGC
>NODE_27740_length_105_cov_2.095238
GAGGTAACCAACTTCATCGTTGATGGCCGATATATACAGGATCATACCGACAGCCAGGGA
CAGACCTGACAGAATGAAGAAAACCCCTCCTACAAGAGTCTTTGCGTCCTTTCTAATGTT
GCCCACCACAGTGAA
>NODE_27742_length_58_cov_204.517242
AAATGTCTGCACCAGTCCCCCAAACTGTCATAGAGGAGCAACCAACTGTGCCCACAGCTA
CACCTGTGGCTTCAGATTCGAATACTGT
>NODE_27757_length_31_cov_202.483871
CAACAGCAGATGTTGATGATGACGATGATGTCCCTGAGTTAGTAGAGAACTTTGATGAAG
C
>NODE_27763_length_65_cov_151.646149
AAAAATATGCACATACGGGCACTTCTTAGTCATGTTGTGGTGTCTGTGTGTATAATTTTA
GTATGAAATCAAAAGTCAGCTGTACACTTTAGGTA
>NODE_27767_length_37_cov_17.729731
ATCTTTTTTTAAAAAGGACACGCTTTTATTTACAAACATTTACAGACTGAAACGCGCTGA
TCTCCCC
>NODE_27768_length_31_cov_2.677419
TTTACAGACTGAAACGCGCTGATCTCCCCTTCCCTTGACGTAAACACGGGAATTCGGTAA
A
>NODE_27791_length_55_cov_108.836365
TTTTTCGGCGATCTGTCCTCTCCATCTCAGAGGATGACCAAAGCCGCATCGTGGCAGAAG
TGTTTGACCTCCCAATTGCAAACAA
>NODE_27792_length_81_cov_134.925919
CAACGTCAGGCTGTAGTAAGGGCGTTCCCCTACGTAATCCTGGGAACAATCTGGCCAAAT
GCCAGTGAAGAGGAGTTCAGACACCTCCGTGAACACAGGTGAGCACTCGGC
>NODE_27810_length_120_cov_45.299999
TTTTTTTTTTTTTTTGTTTTAGTGAGAATTTTTATTGATGCCAATAATTGCACACACAAA
AATCGCATATTTTCAAAAACCCATTCATTCCCTCAAGGCAAACAAATCCACGAATAACCT
GGCTTGCTGGGCGAACGTCTTGCCAGGTAG
>NODE_27818_length_42_cov_67.452377
ACAAACGACATGCGGTGCTAATGAGTTCCATTGTACCAACGGTCAGTGTATTCAAATAGA
CTGGTTCTGTGA
>NODE_27819_length_36_cov_50.583332
TCAGTGTATTCAAATAGACTGGTTCTGTGATACTGGCAAAGACTGTAGTGATGGCAGCGA
TGAGGT
>NODE_27820_length_54_cov_62.629631
GGAAGTTGTCACAGTGGAGCTCTCCAGTCGTGCACTCAACTTTGTGACAATCGGTCTCAT
CAGTCATGTCTCCACAGTCATCAT
>NODE_27823_length_197_cov_133.573608
TTTTTTTTTTAATTGAAAATTTTGGTCATTTTGTTTATCTAACGCTACCGTGTGATGTCA
ACTTCCATTCAAGGCGTGTTGGTGGTGCCGACATTGAACACGGCCCTGCAGCCGTTGTTG
ACAATGATCAGGTTGGCGACGATGCTGTAGCTCTGGTTCTCGATGCACGGCGAGCCGGAC
AGCTGGGTCCTCACGTTGTGGTACAGGATCTGAAAGTTGGCGAAGCA
>NODE_27899_length_64_cov_11.937500
CGCTTACACCCCGTGTGGCCTGGCCTGGAGAGACAAATGGGGGGCAAACAGATACGCTGG
AAACTCCGCCTTCGTCGCGCTGGTCGCCGCCGAG
>NODE_27947_length_278_cov_5.794964
ACCCATAGCTTCGGATAAAGCAAAACCCAAGATGGCATATGAGAAGAGCTGTTGTTTCAA
ACTTGGATTACGTGCATAAGCTACTACGAGTGAACCGAATACTGTTCCGATACCTGCACC
AGCACCAGCGACACCCACGGTNTTCTTAGTAACGACCATTTACAACAACTTAGTTTGGTC
GTAATGCTAACTAGTTATTTGCCGTATTCCGGCTACTACTACAATTACTCTCTGCACAGT
TACTCCGGTAACTATATCCTGACTAGTGAGTCAACTTATCGAATCTGCTTAGAGAACCAT
TCAACACA
>NODE_27948_length_43_cov_331.348846
ATGCAGATACAACTTCTTGGTTGGCTTTGCTCAGACCTTCACGGATCGCCGCAGCATCCA
GTCTGTCCAATGG
>NODE_27973_length_57_cov_73.526314
AACTTTGTCCCAATTGGTCAGAAAGTTACTGTTGTATACTTCTGGGAATGAGTTCATTGT
CTGCATCTCTTTAATGTCGGCACCAGC
>NODE_27979_length_31_cov_154.354843
GCAGAAGCTGATAAAGATGTTGGAGCTATTGTCATAACAGGAAGTGAAAGAGCATTTGCC
G
>NODE_28102_length_32_cov_32.968750
TTTCAAGAATTTAAGCAAGACCTGCAGTCTGGAATTCAACAGATTAAAAGCTCTGATTCA
TA
>NODE_28111_length_68_cov_58.558823
GTGCCCATACCACGTGACCCAATGACAATCAGGTGTGCTTTCTCCTCATTGGCTACTTTA
ACAACAACCTCACCAGGACTGCCTCCGACACTCTTCAC
>NODE_28145_length_76_cov_87.934212
AAATTAAACTTTATTCGCATAGCCACGCGACTTTCGTCTCCTGTGTCGACAACTGGAGCA
CATTGTCCTCTAAATCCTCCTCACACGTCTGCACTGACATCTGTAA
>NODE_28152_length_309_cov_8.650485
CTCAATTTATTTTGCTCTCTTACAAAATAGGCTTAGTTGAATTGAAAGTGTTTCTGTCTA
AAAGAGTAAAAGTACTGTAGGCTTTAAAAAAAATAAATGTGATAAAATATAAGCATTGGA
AATAACAGCACTTGAGCCTGCAACTATTGATGGCCTAGAAGTATTAACCTTAATGAAAGG
CATATGAGATTTGCAGAAGCCGGATGCGAATTATAATAATTTTCCTTAAAATATAAACAA
AAATGCCAAGATGTGTATTTTATATATTTACAACTGCTGCTAAGTTTTTGGAGCCAGACT
TAAAAGTTTAACAAGCCACCACAAGCCTGCACCATGGCA
>NODE_28153_length_114_cov_4.403509
ATTTGTTTTAACTTCCAATAAAACTCATAAAATCTCTGGGAAGGGGGCTGGGAGAAATGA
AGACAACTAAGCTTTTAATCAATCACATGTAGTTTAATACAAAACCTTGGCTTGCCTGTG
AAAAGTATTTTTTCAATTGCTGAA
>NODE_28161_length_138_cov_7.326087
CTCAAATTCACACTGTATTGTAAATCATAGTTTGACTTGTAGCAAATGTAGATGTATGCT
CTACTAATAGAGCTTGCAGTTGTCAATACTACTTATTATGGAGAGTTGTTCAGCAATTGA
AAAAATACTTTTCACAGGCAAGCCAAGAGATCGGAAGAGCGTCGTGTA
>NODE_28163_length_114_cov_38.421051
CAAACAAGGCGGCGCCTGACTGTTGCCTTGCATCAACTGGCTCGGACGAGGGTGTTCATA
CAGAGGCCCAAGCACGTTGTCGGCGTACATAAACCCAATGGTGGTCAGCTGTTGGTTGGT
GAACATGAGGAACAAGGGAAAAAA
>NODE_28167_length_50_cov_6.200000
GGAACAAGGGAAAAAACTTACATCGCGCTATCGCTGTGCTGTTGTACCAGTAGTGTAAAC
CCATCCTAGGAATACATGGT
>NODE_28168_length_77_cov_126.142860
GATTTGGCTTCAAACCTTAAAATCGGACCAGGCAACGTCCTTGTCGGAGCAGTTGTTTTC
AGCCATCTTGCACAGAAATATTTTGATCTGAAAGATAATCCAACGTT
>NODE_28169_length_67_cov_79.447762
GTTATTTGATTGGCCGTCCGTGATGACTATGACGTTTTTGAAAGCATTACTTCGTGCACC
GGCCAGGGCAGTGAACATCCCGGCATTGGTGATGAGG
>NODE_28170_length_416_cov_5.615385
CAGGGAGAAGATCAGGAATCAACGCAAAGTTCTTTTAACAATACAGTTACTGAAACAAAC
ATTCCAATACTCACAGCATGTGCAGAGGCAAATGTGGAACCAAATACAACAGTCCTTAAT
GGATTACAGAAATCTATGGACTCTCCCAAAAGCAAATATAACAATGATGAGAAAAATGAA
GAACAGTGTAAAATGACCATCTTATCTGAAACTAAGGAGGTTAATGTTGAAGAAGAGACA
TATNAACTTCTTCTCTGTATAGTACCTTTCTTTAGACTGAAACCTGGTCACGGCTGTGGA
GAGAACTTAGGTGATCTGTTCCTTCAGGGTCTATTGACCCAGTTTCACCTTCCCCTCAAG
TAAGATCGTCGACGTCAGATAGTCTGGGTAAACCCGTCACTGTACGAACGACGAGGACTA
CGAGTAGATTTACTACCGGTGTAAGT
>NODE_28251_length_32_cov_268.968750
CTCTGTGATTGGTTTCGTTTGTCTGGCATTGGTCTACGCTCAAGACGAAGAAAACAACGA
TT
>NODE_28277_length_40_cov_105.675003
TTGATTAACTGTTCATTTCCACCAGCATGATCCCAGTGATGATGAGTTGTGAGAACAGTT
GTCAAATTTA
>NODE_28278_length_47_cov_67.957443
GATGAGTTGTGAGAACAGTTGTCAAATTTAGCCCATCTTGCTGAAGAGCTTCTTCAACCT
TGTCCGGCTCAACAGGG
>NODE_28284_length_80_cov_70.425003
CAGCCCTAGAGGACAATTATATGTACCTCATCATTGATGAGACATCCAACCAGTGTGCTG
TTGTTGACCCTGTTGAGCCGGACAAGGTTGAAGAAGCTCTTCAGCAAGAT
>NODE_28367_length_41_cov_77.073174
TGGGCTTTGAAAAACCATCACGTCAAAGTGTCTGGATTTGTACCCTTTGGCCAAGCCATT
ATGTGTCTCTC
>NODE_28396_length_31_cov_21.419355
AGGGGAGAAGTCCGTGGAGGTGATTCTGAGTGGAAAAGATGACGAAGAATACCCAAAATC
T
>NODE_28402_length_37_cov_53.621620
CTAGCGTTACGGTGCAGTCGTCCTTGACATCTGGTTCCTGCTGGCCACAGGCTAAAACAC
TGTCGAA
>NODE_28403_length_302_cov_4.149007
AAATGGCAGCTCTAGCAGATGGCCAGCCCCAGGGTAGGTTATCCACGTAAAATTATTTTT
GAACTCATCAGGTATATTCTTCTTATAGGCATCAAGAACTATTGGATTTACACACTGGTC
ATCCAATCCGTGGAGGGCAAAAATCTTTGCCCCATGTTGCCATCCAGGGCAGGAAGGGAC
GATATCCCCAGGCAAAAGCATATCTCTGAAGACGACCGACCCATCCANGACTTCTGCTGG
CTGGGTAGGTGTATAAACTGTGCTAGTTTAAATTTTGACCTATAAAGACGAAGAAAAGGA
AGGTGATCAACACAAGCTCGTTATCCTTCGGG
>NODE_28405_length_32_cov_78.156250
CTTTTAACAGCTCATTCCAAAACACAGAAGTAGCAGCTCGATCCATAATAGGTGCCCATT
CC
>NODE_28415_length_31_cov_105.419357
GACAACATGCTTCAAGACTTTGCCTTCTTGGTCCATAAATAAGATCCTTGGGATGTACGC
A
>NODE_28418_length_419_cov_7.489260
TTTTTTAGTTGGCAGGTTAATTTGCATTTTATTATTGAGAATAAAACAAGGGACAATGCA
TTTCTTGAATTCATTCCAATTATATGAACAAATAACATGCAATGAAGTAACCTCACATCT
TGTACAATGATCAGGTTATCATAGTTGACCTTATACATATTTTCTTTAAGCCTGGCTTGG
TCAAAGATCTTTTGAGGGGATCAATACATTCTTGATACCTTGAGCTGTTACTGAAAATCT
TAAAAAGCTACTTTGTAAAATGTAGTAATGTCTTTGCATTACTTAAAATGAAAAAAACTC
ATTAACAGAATNTATTTCTATAGTGTATAAAATTTAGATCTTAGTTGAAATCGTACAGAG
GTGTCGTTTACTAGTCTCTTCTGTTGAACGAAATTAAAATACAATATGAAAATTTAGATT
TGTTGAAAAAAAGGGGGAGGTATTAAAGT
>NODE_28419_length_55_cov_147.000000
TCAGTCGCCTGACTCCGGTGCACACTGCCGTCGTCTTCAGCTTGATGGCCATGTCGTTTA
TGAGCTGGCGCAGAAACTGACAGGA
>NODE_28443_length_71_cov_1.605634
ACGTGACCATCATGCATGAGCGAAGGCGGCACAATTCAACTTGTTGAAATGATTAAATTA
AATTTAAAAAATCAGTTATTAAAAATAAATAAATTCATCGT
>NODE_28444_length_86_cov_2.023256
CGTCACCACGAGTCTTCCTGGAAAATTGCAGCGCGATAGGATACCGGGAAGTGGGCTAAA
AATCGATCCAAGTTTTTGCGACAGACAGACGTTACGAGTTAATATAAAGGATTTAA
>NODE_28445_length_32_cov_20.406250
TATAGGCTAGGGATAACAGGGTAATTAAAAGAAACGAACCCCGAACCTACAGTGGTGTGC
TC
>NODE_28468_length_93_cov_3.225806
AAACAAGTTTCAGATTGAATGCTAAGGAAAGTTACAAATTTATACATAGTCAGGAGATCT
TTACTATCAAATAAGAATATGAGTTCTGTTAAATGCCAATCAATGTCACACACAAGAGCA
CAA
>NODE_28469_length_31_cov_10.483871
TGCCAATCAATGTCACACACAAGAGCACAAAAGACAATTAAGCACATGAAAGACTTAACA
G
>NODE_28508_length_60_cov_5.583333
ACAAAAGCACCCAGTGTTGAGGATTTCAGTGACTTACATGTTACATGTGTAAGAGAAGAC
CATGTTGAACAGTTATAAATCTTTAGGAGG
>NODE_28512_length_88_cov_7.238636
GAGCCCAAACGATTCCAACAATGTAACCTACTTTGTCCAACAAAGGGGCCCAAATATTCC
AATATGTGAGTTAGCCTTTTCAACGGATGAGCCCAAACGATTCCAACAATGTAACCTA
>NODE_28513_length_81_cov_3.765432
CGAGGCTCTTGAAATAGTATCCCACATTGTTTGAATCTTCGGGCCTATCTCTTGGAAATG
TTAACTCACATTGCTGGATTATTTGGGCCCCTTTGTTGGAAATAGTAGCTC
>NODE_28515_length_67_cov_4.402985
GTAGCTCACATTGTTGGAATCTTTGGGCCCATCTGTTGAAAAGGCTAACTCACATATTGG
AATATTTGGGCCCCTTTGTTGGACAAAGTAGGTTACA
>NODE_28547_length_47_cov_15.808511
AAGAGCCCCAACCGCACGAGGACACCACGCAGCTCCGCCCAGTTTTACCGGCAAATCATC
AGAGACAATGGATTCCC
>NODE_28549_length_50_cov_64.699997
TTTTTTGTTGAAAATTTTTATTAGCTTTAGAATGATAAAAGAGTCGAGGCTCACGGTTTA
GGGAATCCATTGTCTCTGAT
>NODE_28555_length_98_cov_2.642857
AAGAGACTACCTGGAGAGAAGAATGGAACCAAAAGAGTTTCTGACGGTGATAGTTATGAG
CAATACGGTGAGGCAAGAAAGTATCGATTAGAAGCGAAGGAATGTACTTGACGAGGAAAA
TTAGAAGT
>NODE_28568_length_132_cov_4.045455
ATCTATTTGCAAATGCATGTATACCTCCAGGTAAGACTGTTCATAATTCAGCACCTAGTA
CATTGTTTGTTTCTGGCCCTGAGTTGCCTCTCTTTGCACCCACTATTTGTTTGTTCAGTC
TACCCTCAGGGTGAAAAGGTGAGATCGGAAGAGCGTCGTGTA
>NODE_28576_length_116_cov_98.629311
TAGCCAAGCAGCATCCTGCAGAGATCCCGAAGCACAATGCACGAAACCGAAGACTTCTTG
TAGGCAAGCGGCGGACGTGTGTAATGGGGAAAACAGATCTAAGAAAACTTGTAGCAAAAC
ATGCACTGGAAATTGCAGAGATCCGA
>NODE_28577_length_32_cov_29.531250
TAGGGGGAGCAAATGTCAGCACTGCCATCGCCCTCTTCACGCCCAGCCTCAAATTCGATC
CT
>NODE_28604_length_31_cov_245.967743
CTGGTCTTGTGATAAATGGTGATTTTGTGTGTTCCCCTGAAGCAAGAGAAGTACTCAACA
A
>NODE_28606_length_454_cov_5.295154
GGGCAGCCGTCGAACGCGTGCCTGGATATTGTCTGGAGTGGGTTCGAGTCCAGAAACACA
GACTTCAAGTTGGTCATGTTCATGAAAGTGTCGTCCGTTATCTCGGTAATTAGATTGACC
GTGAAGTCAAGATTGACGGCGCTTCTCGGCAGATTCCTCAGGTTGGTGATTTGATTACTC
TGTAGATCTAAATCTGTTATGTTTGACAGCGCTGNAATCTAACTGGCACTTCAGTTCTAA
CTGCCGCGAAGAGCCGTCTAAGGAGTCCAACCACTAAACTAATGAGACATCTAGATTTAG
ACAATACAAACTGTCGCGACTCTACCGCAAACCTTACAGGCGCTCAGAAGGTTGACTCTC
GCAGTCTTCCAATTCAAATAACAACTGCACGCAGTCCCGCAGCAGACCCTAGTGGGGCTA
CCGCGACAACTTCTAGAGGTCGAAAAGGTCGCGGCACTTCATTCTCTAGGTTCGGCCGGT
GCTC
>NODE_28613_length_684_cov_21.948830
TTTTTTTCGTGTGTGTGTGTGAGTGCTGTTGAACTGTTTAACAAAGAGCCTCAAATTGTC
TACACCTCTTCATGGCCACAAAACACTGGAACATCACCAGCTCACTGACCGGACCTCTGT
ACGGCTGACCAGTGATCCACTTGATCAAGAACGCGCGCCGCCACATACTGACCGCGGTCA
ACAGTNTGCTAAAGAAGAGGGGCACACTGTCAAGCATACTGCTCGTGAGATGCCTCTAGC
CGCAGTGCCCTAGGAAGACAAATTGGAAAGCATGACCGAAGAGAGCAGACCTACTGCGGC
CGGCTGTAGCAAACCCCAACGGCAAACTAAAGGAGAGTTGGTGGGAGCTCAATCTGCGTG
CCGCCCATCCGCAGCTCCTAAAGGAGTCGAAGAAGAGAGGGAAGTTGGACATCGCCAGTC
GTGACCAGCACCATTTCCGCGCCAGGACCGTCAACTGGGTGAATCGCAGCTGGCGCTGAC
GTAGGGNACAGTTCGTATGACGAGCACTCTACGGAGATCGGCGTCACGGGATCCTTCTGT
TTAACCTTTCGTACTGGCTTCTCTCGTCTGGATGACGCCGGGCGACATCGTTTGGGGTTG
CCGTTTGATTTCCTCTCAACCACCCTCGAGTTAGACGCACGGCGGGTAGGCGTCGAGGAT
TTCCTCAGCTTCTTCTCTCCCTTCAACCTGTAGCGGTCAGCACTGGTCGTGGTA
>NODE_28638_length_67_cov_2.805970
GGATACAGTCACTTGTCTCCTGGAATCCTACGTTAAATTTACAGCACAGCTAGCACCTAG
GACGGCGATATCCTTTACATTTTAGTTAAACTGTACA
>NODE_28647_length_56_cov_45.714287
TGTCGATGTTTGTAGCCTCTTCTTACGTGTCACATGGCGCGCAGACTTTTCAAAGGGGAT
GTTCTGAAGGCCGTAATAGTGGTGAC
>NODE_28669_length_46_cov_136.956528
GAGAAGTCTTCGATAATAGCATTGACCAACTGTCCCGGGCTGGAGACCTCTGGCTCTAGA
GGACATGTCACTGTCA
>NODE_28670_length_67_cov_158.462692
CCTCTGGCTCTAGAGGACATGTCACTGTCATGTTGTCACACACGACTTTCCCCAGCTTGT
CCTTGTCACTCAGGGAACAATTGTAAACCTCCATTCG
>NODE_28702_length_66_cov_7.666667
ATTGTACCGACAACTCAGATGAGTTACAATGGAAAAACTACGACTGTTCAGAGGGTGAGA
TCAAACGTGACAACTACATTTGTATAGATTCCTCCT
>NODE_28703_length_34_cov_38.264706
GACCAGGTGGAATCGGACCATTGATGGTCCCCGTAGGTGCACAGGACACTGTTGAAGCTG
TAGC
>NODE_28747_length_60_cov_328.083344
CATCAGTTCATCCAACAACAATGCCGCTGTCGGTAATGTGGACTGCCACAAGGGGTGGAA
TGAGCACCTTGTTGATGATGTGGATGACAC
>NODE_28748_length_74_cov_71.135132
ATTGTGGTTCTGGGCGTGGTAGTAAGAGCCGGCATTGGGGCCCTCCCCAGCGTCCCAGTG
TGTGAAGTTCAAGGCCGATCCATCCTCCCATTTGTAAATATTTT
>NODE_28756_length_170_cov_1.705882
GAAGTATTCCATTAGGTCTTATCACATTCTTTGTCACGCAATACGCGATGTCAAGAAATC
TCATCACGAGCAAAGCTAAATGGGTCAAACTTAGCGCAGGTTTATTTTCTGGTTATGTTC
TCGGCAAGATTTCATACGCTCCGACATGTCGAAATAAGATTCTCACACAAATTCCGGAGA
GTAACTTAGCACATGCTATT
>NODE_28770_length_55_cov_20.381819
GCACGAGTAGAAGCCTGTACATGAGCACAACAACTGCTGAGAGGGAAATTGTCCGTGATA
TCAAAGAAAAGCTCTGCTACGTCGC
>NODE_28772_length_47_cov_5.978724
ACTGTTGAAAAGGAAATTACTTAACTCAAGCAGCGAAGAAAAGAAAGTTTGAAATTTCAG
ATCGGAAGAGCGGTTCA
>NODE_28809_length_104_cov_3.500000
TTTCACAACAGCTACATTTTCCCGGTAAGCCAGGCAACTCTTGCTAACACCCACCTGGAC
GAGTGGTTGCCATTGATTGACGTCAGCGACGATTGGCATCTGGAATTCCTAGGCCACAGT
GTCAAGGCCGTGCT
>NODE_28831_length_498_cov_17.939758
TTTTTAACGAGTAAAATGCTTTTAATGCTGAGCTCCTAACAGCACTTAAAAAATTAGGAA
CATTTCATTTTAATGATAAATGGTGACGTTTTTATTACGTCACTGGAGCTGCCAAATAGG
AATGTCACAAAACAGTAAAAGTTTTTTGTCATTTTAGGTTCATGTCCTTAACTTTAGTTT
GTCCCGTAGTCTCCAGCCGAACACTGGGTCATGTGGTACATGTTCAGGTGCCGCCTGAGG
TCGTGTAGGCAGAGAGCTCCCACAAGAACTTCAGACTGTTGTCCTCAACGTAAAATTTAG
ACTCCAGGACATCATGAGTAACCAACGGACAGTTCCCCGACAGGTTGACCGTTGCGTTGA
GGGCCACCTCTCCACCTTTGGAAGGCTTGGGACACTTGCAGTGGAGACTCCACAACTCCG
CGTGCTTGCGTGTCCTTGGGTTGAAGAGATGACCAGAGCCCAGCAACATGATCGGCCACT
TCTGCTGTGCCCCGTTGGTGCCCTCGGATATGAGTACCTGGACCTGCA
>NODE_28832_length_39_cov_13.282051
AAAAAAAAATAGGGATAACAGGGTAATGCGGAGTTGTGGAGTCTCCACTGCAAGTGTCCC
AAGCCTTCC
>NODE_28887_length_115_cov_2.208696
CGCACGATCAATTGCGAAAGACAGAGCAAGCTCAAAGTTCACTGATTTTGATGTAGACTG
CAGCGACAACTATTGCATGAAGTCGAAGGGGGCAATGGCAGAGTGGCAAAATGTTGCCAA
GTATCTTTTACTTGTCAGCCTTGCA
>NODE_28888_length_31_cov_6.580645
GCCAAGTATCTTTTACTTGTCAGCCTTGCATCATCTGCAACATCCTTGCTGGTCCAACTG
C
>NODE_28892_length_161_cov_7.596273
ACAGTAACGGCCACTTGTGATATGAACGATATATTCTGGTGTATTGCATATGTCTCACGA
AATGTGTCGGATTTCCAATTGACTAAAGTCGTTGTTGATTCTCCTGTCTGCAATGGGTGG
AATGTTTTCACACCAAGAACTACTCCTCGAAATGGTGCGAAGGTGCATGCAACACTCTCT
GTCGTGTTGTG
>NODE_28908_length_31_cov_606.903198
TCGACACCAGCACCAACCTCCTGGGACAGGCCGCCACCGGGGTGGGCACCGCCCTTGGGC
T
>NODE_28910_length_48_cov_29.520834
TAAGGTTTTCAAAATGGCCGCCGCAATATCCCAGCATTTCGAGGCTTTTAAAGCTAGGCT
TGATAAAGTTTTACACGA
>NODE_28911_length_31_cov_15.774194
TAAGCCGTGCCGTTGTTTCTGTACACCAAGAAGTTCAAATTACCAGGCGTCTTGCTGTAG
T
>NODE_28912_length_60_cov_15.633333
AGTTCAAATTACCAGGCGTCTTGCTGTAGTAATACCACGTAGTGATCTTTCCAGGGAAGG
GAACTCTGTAACCGTTTCTATCCATAAGCA
>NODE_28914_length_57_cov_204.052628
ACCACCAAAATCCCAACTACTATCACCATGGCAACCACTACGAACACCTCGGCACCCCCT
ACCTCCGTGAAAACCAGGGGAACACAC
>NODE_28915_length_132_cov_93.977272
CACTTCCGGGTCATCCTTTGTTATCTTTAGCTCCTGTGAACAAATGTAGGAAGGCGGGAT
CTTCAACATGTGACGCCATTGGTGAGTTTTTGGAGACCGGAAGTAGCTTGCGGTGGGTCA
TGGAGGCCATAAGACGCTGAAGACGCTTTGCCAACAAGTCGG
>NODE_28951_length_96_cov_2.979167
AAAGAACACAGAATGAATTTAAAAGCGATAACAAATATTAATTTTTTGAATGGTAGCAAC
GTTGCAATAACATCTTATAAACATTTTTTAAATGGTAACAACATTGCAATAAAAATATTT
CATTCA
>NODE_28952_length_81_cov_2.481482
ACAGAGCACATCGTGTACAAACACAGAGGGTTTGTTACATTCAGGCCTACAGCTGAGGTG
TTGTGTGTTGACTCTTGTTGTAAAACCAATTAAATACGTTTTGTTGAAAAT
>NODE_28963_length_38_cov_90.289474
AACGATGGGAAACATAGTTTTTGAACTATATTGGAAGCATTCTCCAAACACATGCCGTAA
TTTCGCTG
>NODE_28974_length_46_cov_167.565216
GCCAGTCAACGAGTCATTTGGGTTTACTGCAGATCTACGTTCCAATACTGGTGGACAAGC
TTTCCCTCAGTGTGTG
>NODE_28977_length_31_cov_57.806450
GGCATATGTGCTTTGACAGTAATCTGTGGGGTATTGCCAATTTGCTGGTTATCAAAGACA
A
>NODE_28978_length_52_cov_11.615385
TTTTTTTTTATTAACCTTAGCTTCATTTTGCTTAAGAACCTGTCCCACCTTATGACCTTG
CCAAGTTGTTAGTTCAGCTGTA
>NODE_28986_length_31_cov_25.225807
CAAGAATGATTAGCTATCAATTTAATTAGAAATTGCCAATTATTGTTGATGAATGAATTA
C
>NODE_28987_length_78_cov_3.358974
GTATACGCCTGGTACTGCCCATGGATGTAGTTATTGATATAATCTGTTCAGGGAAACCAA
CACTCCAGCCAAACTGACGTATACGCCTGGTACTGCCCATGGATGTAG
>NODE_29037_length_37_cov_118.135132
CAATCGACTTGAAGATCTTGGGAGTGAGAATACCTGGCATAAGTGGCGAGTACCAGGCCA
GTGTGAG
>NODE_29051_length_38_cov_125.921051
ACATCCAAGCTAAGCGATTGGACAGCTTGGCTGAAAAGATTGCTGCTATCCGTAAACTGA
GGGAAGTG
>NODE_29056_length_41_cov_148.170731
CATTGATGCTAACGCAGTGAAGGACTTCAATCTGAAACTTAGACTGAACGATTTCGAAGC
TCAAATTAACA
>NODE_29066_length_45_cov_39.488888
TGCCAGTTTCGGTAATATTCAAAGCGTGAAGCCTGGGCGTCGGTGGTTTGAAGATAGATG
AAGTAGCGTTGGCAA
>NODE_29067_length_31_cov_45.419353
TCCCCAGCTATGCCTATCAGTATGACAGCTTCCGTCGCGTGCAACTGGCAGCTGTCAAGC
A
>NODE_29068_length_63_cov_3.555556
CCGATACAAAAACAACTTGATTCTTTATAATTTTATATAAATCTTGCAATCTAATTTTTC
GCACACATAAGAACCTAGAAAAAAGCTTGAGGA
>NODE_29069_length_31_cov_10.193548
CACATAAGAACCTAGAAAAAAGCTTGAGGAAAATGACGCGTTGCTGTGCTGCATGGACAC
T
>NODE_29076_length_77_cov_7.350649
CTTTATCCTAAAACCTGTGGGTTATCTAACGTTATCCTAAAACCCGTGAGTTCAACCACG
TAATGTCATTATAAGCCTGAGTCCAAGGAGTCAAAGGAATGTGTTCA
>NODE_29097_length_86_cov_9.802325
AAATTGTTAAACCATTTTGACTTAAAATACTGCCATTAAAACGTCAAGACTCTGCTGCAT
GTAATGAGTCATTCAACAGCTTAGTTGTTTCCCTTTTCATAAATGCACTAAACCAG
>NODE_29098_length_580_cov_16.818966
AAAATAGGGATAACAGGGTAATATTTGAACGGAAATCGTGCACTTGAAATGATGTAGTTG
GTGTGTCTGTACTGCATAAACTACTGTAAACGTAGATAACAANAATCAAGGTAGATTTCT
CCGACGAACAGTCTCCAATATCTCGTCCCAGTCTCCAATATCTCACACTGCGGGTCAACT
TACCAATTAACTAGTCGGCTTGTTGTGACTACACGTGTAGAGACTAACTGTAGATTCACC
ACTTGTGACTGTAGACTCACCACTTGTTAATGTAGATGATACCGTGTTATAGGTTCAGTG
NATGTAGTCTTATAACTGGCCTGCAAGGTTACAAGGCTTAGTTCCATCTAAAGAGGCTGC
TTGTCAGAGGTTATAGAGCAGGGTCAGAGGTTATAGAGTGTGACGCCCAGTTGAATGGTT
AANGTCATACTTAAAACACCCTTGTCCACGGGGTCGGTCCCCTCTGTTGGACTTGTCTCG
TAGTCAGTCAAGTTAAGGTCAGCAATNGTGTCAGGTTAAAGAGTGGGGTCAAAGGTCATA
GAGTGTGACGCCCAGTTGAATGGTTAATTGATCAGCCGAACAACACTGATGTGCACATCT
CTGATTGACA
>NODE_29122_length_74_cov_2.878378
CGCCAGTCTTCTATTGGAAGTATAAACAAAATCATTCCTGTGCCAAGATGCATTTTACAA
CTACCGAGCTTGTCATAAAAAGGATATGGTTGTTTGGTGTTGGG
>NODE_29123_length_90_cov_4.822222
GCGATGGGGTCCGTTTTTGAACAGCAAAATTATGATGAGACACTCTCAGCACAAGGAGCT
GAAGCAGAAATGAAGCCTTATCATACACCTGCATGCAGAAAATATCGAAGTCACACAGAG
>NODE_29124_length_35_cov_161.628571
CAGCAGTTTTGATGATTTCTTCTTTGTTCTCGTCCCAGAATGTTGACACGGTGTTCAACG
CATCG
>NODE_29129_length_37_cov_65.405403
ATTGCCTTGAATTTCTGAATCAAAGCGTTATTGTCGGAAGGATCAACTCCTTGCAAAGCA
TCCAACA
>NODE_29130_length_124_cov_57.572582
AAAAAGCAATGTTATGAACACGGCTGGAGTAACACCCGTACGGGGTATGGAAAACCTCAT
TGTGAAAGGACGGCTGTATTGACCAGCGTAATGGCTGACAAACAAAACAACGTGACTAAG
GATCGCTTGTTTGGCATCCGTTGTTGCATATTCC
>NODE_29162_length_49_cov_81.408165
CCTGGAAGGATTTGGTCAAGGTCTACGAGAACATTTTCAACCGGCGGGAGATTTGGCAAC
CCAAACACCTGTAGGACAA
>NODE_29173_length_146_cov_5.397260
GTTTGTTTTCCGCTGCTGTACCAGTGGGTGTTTTGAGGATTGAGAAGAAGAGTTTGTGAT
TGATATAACCACCACCATTATTACGTAAAGCTAAATGATAAGCTTCCGGTAAATGTTGAA
GATGAGTAAGAATTAATTCGATTGGTTGTTTAACTAAATCTTTTAATTCTTTTGTA
>NODE_29174_length_309_cov_8.776699
TGCTTATTACAACTTACCAAGAGATCAATCATGTTTGCTTGTCTTGTTCTTGTCGCCATT
GCAGCTGTTTGTGCACAAGCACAAATGGAATTAACTGTTCCACCATTACCATACGAATAC
AATGCCATGGAACCCGTTCTTTCGGAAAAATTGATGCGTTTACATCATGATAAACATTTC
CAATCCTACACCACCAAGACCAATGAAGCACTCAAAGCCATGATGGCTGATGAGAAAGTT
ACCAAAGAATTAAAAGATTTAGTTAAACAACCAATCGAATTAATTCTTACTCATCTTCAA
CATTTACCGGAAGCTTATCATTTAGCTTTACGTAATAAT
>NODE_29178_length_39_cov_38.076923
CACAGGTCAACAACTGACCCTGGTACGTGGCCGTCACGTGGATCTTGACCCCACCGGACA
CCTTGACCG
>NODE_29179_length_361_cov_48.609417
CAAGGTGCAGCCCAGCCCTTGTCGATTATCAGTGAGCTGGAACTCCAGGCTCACCAGGAG
TTCAGGAGCTTGTTGGATCATCTGAGCTTCAACAAACAGAGGAATGACGAGTCTTACTCA
GCGAGGAATGTCAAAGGTCGACTCCAGACCTTCTCTTTCAAGAACTGTGCCGACCCCAGC
ACGGAGATAGCGGTCCCCAGCAACATCAAGGTGTCCCCGGACCCCATCAAAATACCTGGA
AACATCACGGTCTCTGGAAACGTAGTCTTCAAGAAAAGTTTCGGCTCACCAATCAAAGCC
GTTGCCGTGATTGAGAAGGAGATGTTTGGCGTGTGGGTCAAGGTCCCTTGTGTCGACAAC
GTTGGCTCCTGCACATACGAGGACCTGTGTA
>NODE_29180_length_32_cov_88.875000
ACATCATGCACACCGACGCCGAGCCGATACTTAACGCGGGTTTCGGGACACGTTATTCCA
TC
>NODE_29181_length_170_cov_41.358822
TTAATTTTCTCCTCGGCCACTCGTGAAAAGTATTTAGCCTTGACAATGACTGGCTGGCTG
GGAAGGATACCTTTGCCCAATACTTTAGCATATCCAGCGCGGACAACGTCGATGACTGGT
GCCTTATCTGTTTTGTCCTTGTAGGTGAGACGGTGCTGCTCGGTGACCAAGCTCCACAAT
TTATCCAAGTTAATAGCTGG
>NODE_29182_length_42_cov_128.095245
ACTAACTGCTGCAGCAGCAACAGCACCCCCAGAGGGTACAGATGCAAGTTTCTTGGCTCC
TGCAGCAATTAG
>NODE_29196_length_34_cov_182.647064
TTTTTGCAGAGATGATGGCCTGCTTGTATGGCAGAAATTACCTGCTGACAAACCAGTATA
TGCA
>NODE_29199_length_40_cov_99.349998
ACCTGCTGACAAACCAGTATATGCAACAATTGTGGGTCTTGTTACTACTGGTGTACTTTG
GTCTGTCTAT
>NODE_29213_length_209_cov_67.966507
CCCCAGCCGCCCACAGGAAGGATATACTGGCGGGCTCCTTGTTGGCCCACACATACTTTC
CCTCAATGTCGATGTCATTAACGCCAGACCATGCTTTCTGATTCAGGCCATTCTTTTCTG
GGGCTATTATTAGCCTTTCAGCGTCTGATCTCACTGAGGCCAATATCCCTCCTCCTGGTA
GTGACTGACAGTACGCCTGTGAATCAGCCCAGTTCTTGCGATCTGAAATGTACTTGAAA
>NODE_29214_length_225_cov_78.884445
CTCTAGTTCCAGCTCTCATCAGGGGCACTGCCACCCCAACTGGCACCACCTTCAACGGGG
GCAGCAGGGGCTGGTGGTTCAGCGGACCAGTCTTCCATTTTAGGAACAGCCCAACTATCT
TCCGTAGCAGCAGGAAAGGTAGCTGCAGTCAAGGGCACAGTAGGCACACTGACAGCCTCA
GCAGCCCAGTCACCAACATCAGCTGACACAATACCTGCATCTGGGTTCCAATCTTGCTGA
GGTGCAGGGTTTTCC
>NODE_29239_length_96_cov_1.937500
CGCGTCATTACTCAGATCCTGGTAGAAAGCTGTGTCCTCTGTATCTCCTACCATCACCCT
CTGGGCCTCAAACACGCCATCAGATCTTAAAACTAGAGTGTGTAGAGGGATGCTCTTGGA
CATGTG
>NODE_29251_length_204_cov_29.441177
TTTCGTTCAGGTTGATCTTGACTTCACCGATGATGTCGGACGAGCTGACTGAATCGATCT
CGTTGACGATCAGGTGCAGCTCGTTTTCGGTACCCTGAACGAGGTGGCTCAGAGAATCAG
TCCACTGAGGAGTTCTGCCTTGATCCTTGGCGATGCTCGATTTGTACACCATGTTTCCGA
CGCGGAATTCGCACTGAGGGTCCATCTTGCCGAGATCGGAAGAGCGGTTCAGCA
>NODE_29290_length_67_cov_73.223877
AGGAAACAGAATCTGGAAACCCCCGTGCATCTGTTATAACCGTAAGACCACCGATCTGAC
CACTCGTTTGCAGGTCTGCGATGATTTGAGGGAACGT
>NODE_29316_length_316_cov_9.218354
CTTCAACAAAATGCAACATTTCATCTCGGAAGTTGCGTAGCCGTGACGTCACTTGCACAC
AATCCTATCCACCATTTTATGTTTCCTTATGGGACACGTGACCAAGCCATCATCATCAAG
NACAGTTGTAGAACAGTGATCACTATGTGGTATGAAGCCTGCCCCTCTTGTATCACTTGG
TGAATATTTACACATTTACAATATAGTAGTCAATGCTATAAAATCGTATAATGAAGGACT
CGGAAAAATCTACAAGTTAAATATATTTACAGATCTAGATCAGTTATGATAAACCGATAT
TCCACTCCAAAATTCAACCCTATGTAAATCGGTCCGATTTATTTTT
>NODE_29345_length_84_cov_228.964279
GAAGTACCCAAGTAATATCTGATCACAATGCTGAGCATCATCCTTGCCGCACTGGTCACA
GTACTTGCAGCTACGGCTGAGCAAGTGCCGTGTAACACCGGGAAATCAGTTTGT
>NODE_29381_length_234_cov_2.957265
TGTTTACGGGGAATCTCCTGCTGTGTAAGGGGGACAACTTCAGTAGTTTGTGTTTCGTTT
CTGGACCTTGACATTTGATGACGTTCCTCTAAGATGTTCACAATGAGAACGATAGCGTTG
AACACCACACTCAGGAAGGATTGGATGAAAAGTAACGTCATGTACATCACTAAAATGGAA
AAATTTTCCGAATTCTGTGGGATTCGCCCAGATATAAAATCTATGATGACCGTGAAGGAG
AGCAGCACTGTAATGGCTACCATC
>NODE_29382_length_135_cov_2.348148
ATAAACTTGGCCTATTCCCTTGAGTAGATCCGTAGACCATTTAACGGTTAATTTATAACA
TTCTGTCAGCTTGCTTCACAGCCAGCGATCCGATGGACAGCCTAACGGGTGAAGTGAACA
ACGTCATATTTACAGGACCTGACGGTCTACGCGACTGCCGTGCTC
>NODE_29385_length_32_cov_168.781250
CTTGGCCCATTGCACATCTTCCAATAAATAGTGAGTGCTCCAATCTCTTGGCCCAGTGCA
CA
>NODE_29500_length_37_cov_202.000000
CTCATTTCTAAAATCATGCCCTTGCAACCAAAAGAGTAGTTTGATGCCGAAGTGATGGCC
AAGGTGT
>NODE_29501_length_107_cov_47.177570
GAACTTGTTCTAAAACACCAAGTGTTTATGAGCCTGGCAATAGTCAGGGGTGTTTATGGA
ATTTTCGGCATTGTAATTGGATGTTATGCGATCTTCAAATCTACAGTGCTAGATCGTGAT
GTAGTTTTTGGGAGAAA
>NODE_29502_length_183_cov_74.338799
GCTAGATCGTGATGTAGTTTTTGGGAGAAATGCTACAAGCTCCTTCGCAATGTGTGTGAC
GGTAGGATTCTTCATCTTTGAATTATCAGCTGTACTTTTGTCAGATGTAGCTTTTAAAAC
CTTCTCAAAGATGCTCATTATGCACCATGGTCTGGCGCTGGTGGCCTACACCTTGGCCAT
CACTTCGGCATCAAACTACTCTTTTGGTTGCAA
>NODE_29503_length_125_cov_195.807999
GGCAACGTGTAAGTTGTCAAGGAACTGCCAGCTCCTGAAGGTGACGAAGAATTGAGAACC
GTTGGTGTTGGGTCCCCTGTTGGCCATGGCTATTGTCCCTTTCTCACTGATGCCGATCTG
GAAGTTCTCATCGTTAAATGTGTCTCCGTACATGC
>NODE_29504_length_132_cov_186.856064
TCTCATCGTTAAATGTGTCTCCGTACATGCTGATACCTCCTGAGCCATCACCGGTTGTGG
TGTCGCCGCACTGGAAGTTCAAATCCTTGATGAGTCTATGACAGTAAGTGTTGGCGTACT
TCAGTTCACCAGAAGGCCGCTTGACGCCGTTACAGATGCTGA
>NODE_29505_length_117_cov_42.572651
AAAAATAGGGATAACAGGGTAATACGACCTGACCAACAACTACGACAAGAACGGTGACGG
CTGCGTCACGCTGCAGGAGTGGACGGACGTCTGGCGTCGGTTCAAGTTCTCGGCAGAGTA
CGCCGCAGCCAGGCTCAAGGACCTCGG
>NODE_29535_length_40_cov_83.275002
TACAGTGTCAATGACAACTATTATAAAGATCGCCGTTTTGGTTTCCAGTGCTGTGATTTC
AAAGGCCGCC
>NODE_29542_length_85_cov_12.141176
CCTCGTTCAGGACGTAGTCAGATCTGACATCGGTGTACTGGTCGTTGTTGTCGGGGCCAC
CCACCAGGGCGCCAGTCAACACGTGGGGGTTGAAGATCGGAAGAGCGTCGTGTAG
>NODE_29550_length_259_cov_8.853282
GCGGAGTCGACATCGTGATCGTGTCAGTTTATTGTTTTTTTCATCACAGTTTTGTGAGCT
GCAATGCTGGTTTTAGAAGATGGTATGAGGCAGGAAACAAAATGAAAAGGGAAAGAGAGT
TCGTCTACGCTGATGTTGTTGACTGTTTTGAACAGAGAGTGAGTCTATCCACGGAATTGG
TAGCCAGCGAAGTTGCCGTATGGTTGGTAGGTGTTGGCGAAGGCTTGGCCGGCGAATGGG
TTGCTCGCTGGCATGGCGCCCATGAAGTTATCGAACCGCAGGCCGAATG
>NODE_29553_length_207_cov_57.512077
AAATCTTCCACAGCAATGACTCCCTTGTTGCCCTTGTCCAACACACGGAATGCCTCCTTG
AGCTCCCGCTCATCCTCGTCCTCCCTCAGTTTGATTTCATAGATTGGTTTGAACTGATCC
CATCGGATAAATCCGCATGCTTCTTCATCGGCCTCATCGGCCCACTCTTTCAGCTTCTGT
CCATCTACCTGAAGACCTAAACCTTTAAAAACCTGGCCTAGGTCTTTAGTGTTGACT
>NODE_29566_length_69_cov_4.623188
TGGATATCACAGCCAATTCATTCTCAAGTATCCAAGCCAGACACATAAGTTTAGGGATCA
TCACCATGGCCCCAGATATTACGTCTATTACTCTATAAA
>NODE_29570_length_31_cov_11.290322
TGAACCACAAGGAAACCTTGTACACATTATGTCTATTACTCAATAAAACATACAACCTGT
A
>NODE_29585_length_112_cov_78.580360
TGTTTGAAGAGAAGTGCAGACTTGAAAGCCCTTGGAAGTTGAAGTATTTCCTGGCCACAA
ACATGACAGTAACAGCAACGGCTATGATGGCCACGCAGCCTATGACGATCCCGGCGATAG
AGCCACCACTCAAGGATGAATC
>NODE_29591_length_73_cov_37.547947
GCGTGCAGTATTGCACTCAATGAACGGAACTTATCCACCTCCAGCTTTTGCAGTTACAGC
AGCTATTACAGATTCACCTGTTTCCACAAGGAATAATCTGGAC
>NODE_29604_length_479_cov_4.747390
CTGCAACCAACTCAGTCTAATACAGAAGTGATGTCAAGTTGTGACCCGAATTTCTGAATT
CGTCTATTCGTTTATTTTGGATTATACACTTAGTACAAAATTTCAGATATGGCAAGTGAC
AAGGAGGGTTCCCCAAACAAATCTAGACAGCAAGATGACAGGAAAAAAAGGAGGAAAATG
AGTTCTCATGATGTGAGTCCTCATCATAAAGGCAAGCGTAGGAGTTCTAGCAGTTCTCAA
AGAAGCCCTTTATCATCAAGGTCTGCAAGTCCATCAGAAAAGCATAGGGGCAAAAGGAGT
GAAAAGTCAAGCAAAATAAAAGATGACAGATCAAGAAGCCGTACCCCAACTGCTTACCGT
AAAGATGCTGGGGACAGGGATGACCCTAATGTTTGCCATTGTCTAGGAGTGTTTGGTCTT
AGCAGCTACACTCAAGAGAAAGATCTAAAAGAAGTTTTTGGCCGATATGGAGCCATAGAT
GATATTTGTATCATTTATGACAGACAGAG
>NODE_29605_length_91_cov_1.703297
TTCGCGAATGGCACTCGGGCTTTTTGAAAGACTGTCCAAGTGGCAGACTAAACAAGAAGA
AGTTTATCGAAGTCTACAAGCAGTTCTATCCCACTGGCAAAGCAGAGAAGTTCTGCGAAT
A
>NODE_29607_length_31_cov_2.000000
GCTTGACCTTGAACTCCATTGTGTCAAGGGCATCGGTAAAGATCATGCAAAATTTTCTCC
T
>NODE_29610_length_119_cov_5.529412
ATAGGCTAGGGATAACAGGGTAATATTAAACTCAACCTTAATTTTAGTCTATGGGTAGTC
ACAGTAAAATTGTTCCAATCATTTTCATTGACTATTTTATGAAGCATTTAGTTCAATTCC
ATTAGAGAGATCGGAAGAGCGGTTCAGCA
>NODE_29613_length_47_cov_41.085106
GAATGCGTGAACAGTACGGTGAACCTGCCCAATTTGCACACAGCTATACAATCTTGAGAT
CGGAAGAGCGGTTCAGC
>NODE_29619_length_41_cov_54.634148
TGCGACAGATCCTGTCTTTCCAATGGAGCTGGACGAAAGAGACGTACCGTTGGTGACAAA
ATAACTGGACT
>NODE_29620_length_31_cov_63.645161
TGTTACGAAGTTGTAATCTGCTCATCACTGGAAGAGTCGAGGAAACGCTAGCTACAAGAT
G
>NODE_29621_length_32_cov_85.125000
AAGAGTCGAGGAAACGCTAGCTACAAGATGTAAGTTTTCGAGATTAGTGTTTAATGAAAC
GC
>NODE_29726_length_72_cov_109.791664
CGGCCACTCTCGTGTAAGCACCTGGTAGCCAGCCTTCACAAGAGCTGAGTCCAAAACTTG
CTAGTCCTGCCAGGTACTCTCTTGATTGATGACGGCACAGCA
>NODE_29731_length_54_cov_34.074074
AAAACATCAGGAAGTGGGGGCTCATCGCCTGTTCTCATGGAGGTAGCAATGCCAAAGATT
ACCTTCGAGGAATGCAAAGCACTT
>NODE_29732_length_121_cov_60.909092
GACTACAACGCCCTCTTTGACGACGCTGACGCCAACGTCAACAACCAGGTGTCAGCACTG
GAGTTCAACAGATGGTTTCATCAGGCCGTCGGCTCAGGTGTAATCGGCTAAACTATCATT
GTGAACACCAGATCGGAAGAGCGTCGTGTAG
>NODE_29733_length_31_cov_40.580647
CTTCAACATTCAGCGTGGACGTGATCACGGCATTGCCCCCTACACCACGTACCGCGCCCT
T
>NODE_29737_length_31_cov_16.483871
CACGTACCGCGCCCTTTGTGGTCTGAGGCCAGTTCGAGGGTTCAACGACGTCAAGGCCCT
G
>NODE_29743_length_39_cov_76.051285
TATATTATTTTTTATTTGAAAGAAATCAGCTGTGATCGCATTAGCGTTTCCATCTCCTCC
TGGCCACTA
>NODE_29785_length_147_cov_71.061226
AAAAATGGCGTCTGTGCTGTCCATTCTGTATTTAATGCACTTGCCGCTTGCTGTAACATT
ATAGGCGATGAATGTTTTAAGATCAAAGACTATAACATATTTGCCTATTGCATCGTACTT
CGCTGCTACATTTTTAGTAAAATCAAGGGAGCAAACAGATCGGAAGAGCGTCGTGTA
>NODE_29786_length_53_cov_20.188679
GTCCAGATCAAGTATGTGACCAACAACGACCCACCATTTTTCTTTCAGTGTAGCGATGAG
ATCGGAAGAGCGGTTCAGCAGGA
>NODE_29787_length_81_cov_3.086420
GTCAAGTTCTCATAAATGGGGCGTACGTGGTTACCGTGGCAACATCACGATTGGCGTTTT
GTTAGCGATGACCGCCGAACCGGAAACGTTAGTTCAAGTCCGCTACCGTGA
>NODE_29821_length_45_cov_85.111115
GTAAATGGACGACGAAATGTTGGTTTGGTTCGAATCTTTCGATTGCGTGTTAATTGATTA
CCACGAACAGCACGT
>NODE_29822_length_52_cov_69.673080
CGTGTTAATTGATTACCACGAACAGCACGTTGTTTCGCTTTGAGTGCTTTTGATTGCCCT
GTTATCCCTATTTTTTTTTTTT
>NODE_29847_length_50_cov_164.300003
CATCAATCATTGCACTCTTAGGCAGATGTTTTCACCAGTTCGGTACCTGGCCGACTCGTT
TTGGGAAACGATGTTTAAAA
>NODE_29872_length_50_cov_38.660000
AATGATGACAACATATTCGAGTGGGAAGTTGCAATTTTCGGGCCACCAGGAACTCTGTAC
GAAGGTGGTTATTTTAAGGC
>NODE_29876_length_123_cov_2.154472
AGTCACTGCTTTTCTCTTCACTGGTCTTTGACTTTTTCATCGGATTAAAAAAATCAGAGC
CCTGACCATTCTTCTCACTTTCTTCAGACCCGTGGTTATAGAAAGCAATGTGATGAAGTA
TTTAAATGCACAAAAAGCGCAAAGCCCTAGAAA
>NODE_29877_length_91_cov_3.923077
CTCGAGATACAAGTGCCCTAACATGTGAGTTATTTGAGATATGAGCTGTCGAGCGTGCGA
AGTTTTGTTTTGAAATACGAGTGACATTTGAGAAACGAGGAACGGCCAGCTGCGACGCTG
C
>NODE_29913_length_47_cov_4.829787
CCTCTTTGTTTGCGTCCGTGTCTTTGAAATGTACCGTTACTATCTTTGAATCGGAAGAGC
GGTTCAGCAGGAATGCC
>NODE_29916_length_180_cov_12.738889
CAGAAACTACAAAACATTATTGGAAAATATCGCTACCTTGGCATCTTCTTCTAGCTATAG
ACTGACTCATTTGTTCAATCGATAGTGATAACATTTCAGAAGAAGAGCAATCAGGGAGCA
ATTGCTTGAATTTCGATCAAATGTTTCGCTGCTGCCACCGATTTGACGGTTTATACACCG
GGCAAAAGGAGGCTCAATTAATGATACCGT
>NODE_29918_length_79_cov_38.784809
TCAAACTCAACTTTTTAATGAACAACATTTCTATAATATTATCTGACATTATCATTGGTT
GTCCTGTTGTATCAGATCCGAAGCTTTTTCAGCAATCATGATTGTGGGG
>NODE_29930_length_56_cov_4.482143
GCAGCAGTTTTGCCAGTCAAGAGTAAAGTTAAAGTACTTAAAGTTTACTTGAAAATGTCT
CTGGATACCAGGCATTGAAACTTAGT
>NODE_29931_length_86_cov_3.406977
CAGTGGAATGATGTCTTTCTATTAGGGCAGCCATGATGTTTAAGGTGCTCAATCATCGAG
CGAACCATGGTAAACAGGTTGGAAACTCCTCCGAAGCGATTTGGTAATGTAACTTT
>NODE_29933_length_35_cov_73.057144
TGTTGGCAAACACCACATCCCTTGGTATTGGTCCATACAAGCATGAAACAGATTTTGAAG
AAAAA
>NODE_29934_length_322_cov_8.366460
TTAATGTAAAGGAAATAAACTAGTTGTACAAAAGTTTTGTATTGAACTCATCTCGACAAA
CACATGATTGTACTTAAAATGTGTGTAGATGGGTTCAACAAATATAGTTTTCTGATGTGA
TTCGTTCCGTCAAGCTGTTAGTGAACTTCTTTCGAGTTTGAGCAGATCTTTATTACATTG
GCCTGGCGTACTGCTCTGCTTTCACTATCTTCGCTTCCCTGGCAAGTTGACAAAGCGAAA
GTACGGGACAACAGCAGACGATACAGCAGTCGTTCATCACAGACCCCGAAATGTTCCTCT
GTGTTCTGACCTTGGTTCTCAGGACGATTTGCCACGCCGGTACGCAGTATGG
>NODE_29938_length_408_cov_9.428922
CTTCGACCTACATGGACCCTGCGGGCTACATGGGCCCCCCGGCCCCTGGAATGCAAACGA
TGAACCATTCAACTAATGTCACCATAGTACAACAGCCGCAGCAACAGCGATTTGTGTCTA
ACAACTGGAGCACGGGCTTGTGTGAGTGCTGCAGTGACGTGAACATCTGTATGATGGCCT
TGTGTTGCTACGCATGCCTGGAGTGCAAGGTTGCAACTGATTTGAACGAGTCCTGCTGTG
TGCCATACTGCGTACCGGCGTGGCAAATCGTCCTGAGAACCAAGGTCAGAACACAGAGGA
ACATTTCGGGGTCTGTGATGAACGACTGCTGTATCGTCTGCTGTTGTCCCGTACTTTCGC
TTTGTCAACTTGCCAGGGAAGCGAAGATAGTGAAAGCAGAGCAGTACGCCAGGCCAATGT
AATAAAGATCTGCTCAAA
>NODE_29946_length_88_cov_88.170456
GTGACATGTGTTTCTGTACGAAATGCATCATTTACGGAGAGGAGTGATGAGTCAACTTTA
AAATCAATAAGCACTTCCATAGTTCCTTATAGAAGTAAAAGTACAGAAGTTGCCCCTG
>NODE_29947_length_49_cov_71.224487
GCCACATGGAGCTCTTTCTTCCCCAATTGACAAGATCATCAAGTCTGGCAAGGGCATACT
CTGCTTTACTACTGAATGG
>NODE_29948_length_31_cov_65.451614
AAGGGCATACTCTGCTTTACTACTGAATGGCCCTTGAAAAGGTGAATAAGGTTTCCTGAT
A
>NODE_29949_length_111_cov_1.594595
CTTACATATGTGGAGAAGAAACAGCACTTATTGAATCCCTTGAAGGCAAACAAGGAAAAC
CCAGGCTCAAGCCCCCTTTCCCTGCAGATGTTGGTGTGTTTGGTTGTCCAACAACTGTTT
CCAATGTTGAGACTGTAGCGG
>NODE_29951_length_75_cov_73.599998
TTGCACTATCACCAGACTCATCTAGTAGATAAGGTAGCTTGACCTGACTTCTTGCTTGCT
TCTCTGACTCAGTGAGGGATAGGTTAAAAGAGAGGTCAGCCATTG
>NODE_29959_length_42_cov_18.119047
AGTGACCCAATGGCTGACCTCTCTTTTAACCTATCCCTCACTGAGTCAGAGAGATCGGAA
GAGCGGTTCAGC
>NODE_29968_length_152_cov_92.842102
AAAAATTAAAATCTGAAATGAGTATCAGACTCATCAATGAAAATGGCTATCTTTCTTGGT
GTCGTAATGGTTACCTGGCAACAGTTGTTGGTGTAGCCATGATAACAGGAGGATCAACTG
CATTGTCTCTGGATGCTGGTTTATCTGCTCTGTTCATCGCCGGACTGAACATCTCTTGGG
GA
>NODE_29969_length_46_cov_64.260872
GACATTCCCGAAACCTGCCGCAGTCGGATTAGATTGATGATGTGGCTCAGGGCTCCCCAA
GAGATGTTCAGTCCGG
>NODE_30051_length_31_cov_1.774194
CAGCGGACACGGTCTCTTCGTGCAGAAATAGCCAGTCTGTCGACAGCTACAATAGTTACA
G
>NODE_30116_length_78_cov_8.538462
TTGGGGCCACACTGGTATGATCCTGGGCTATAGGCGCCTTGTTTTTGGTAGTTATAGTCT
TGGTTGTTACTAGACGACGGGTAGGTTGGGTTACTTGGATAGGTTGGC
>NODE_30124_length_41_cov_139.463409
CCAAGGGGGCGACACCCACTCCCAGATGGGTCTTATCTCGGGTGAAAACACGTAAAAACA
TCCAAGGTACC
>NODE_30156_length_175_cov_45.354286
TCAACGCTGCCCTCCAAACGCCCTCGGCCATCGCCAGAACGAACGGTGTTCGCCTCGCTC
TCATCGCGTACAGGGATTGGATGAAAAATCTGGCGCAGACGGAGAAAATGCTTCCGGGTC
TCGGGTTGACCAATGAACAGATGGTATTCTTGGCGCACGCGCAGACTTTCTGTTACGACA
AAAAGATCGGAAGAGCGGTTCAGCA
>NODE_30157_length_31_cov_226.258072
GGCTTTTTATCATCCTTGTCTTCAAAGCAATGTGCAGCTGTTATCAACTTTGTTGGTGAG
A
>NODE_30158_length_36_cov_37.055557
GTGCAGCTGTTATCAACTTTGTTGGTGAGATGAGAATGTTAGGGCTGACAAGCACTGCCG
ATGATG
>NODE_30159_length_59_cov_113.152542
TGCCACTTTCTTCACAAAGTCTAATAATGGTGGCTATGACCTTGATGGTGAACAGCTTTG
TTCTGCTTTGCGCTACCACCGCCAACCAC
>NODE_30184_length_103_cov_185.737869
GATTTGGCTTGTACTGAACACCAACACCATCTGGGACCAATTTTCCTTCAGCCCTCATCT
TTTCATAGTCTTCACGTGACCACTTTGTGAATCCCCATTTCTTGGAAACAACAATCTTTT
GTCTGCCAGGATA
>NODE_30185_length_134_cov_4.373134
TAATTTTAGGCTTTGACTTCAGCATGGAGAGAAAAAACTTTTCCCTTAAAGGTCAATCCT
ATTGTGGACTTCTTCGCTGTCAGGTGGACGCCCTCACAGAAGATAAGGTCTCGTCCCTCA
TCAAGATGGACATTTATTATTTAAATAACAGAACTCTGATGGCT
>NODE_30192_length_48_cov_38.062500
CATCCAAACAACATCTACAAGTTTATCCTCGGAGGTCAAGAGATGGACTGTCCCCAGGGC
ACTTACTTTGACTTCAAG
>NODE_30208_length_52_cov_81.346153
TTACAGCATTCAGGGTACAGCTTGGTGACGTCATGGTAGTTGTAGCAGATGCTGATGTCG
TAGTCGAGGGCGTACACACCAC
>NODE_30232_length_153_cov_15.366014
TTGGGAATGTATTGGGACACGCCCAGGGGAAGCATTTTGCCAGTTGACGTTGACATGACC
TTCCAGAATGTCTTCTTAAGGTTGGAGGCAGTCAGTCCGTTAATCTTATTTATGAAGAAG
CCCAGTTTCTTTTGGTACTCTACGGTAAAACTGAACTCTGACCTGTTCTCGGCGGCCGCC
TCC
>NODE_30284_length_229_cov_53.519650
TCACATCCTTTCCAGGCAATCATTTCAGTATAGGTAGTGTCCCTTGCGCCTTGGACTTGA
AGCGGTCCTCAACTTTCTTTCTATAGCCTCATCTAACTTCGGTGCTTTGTCAGTCTGTGT
TAGAGACATGCCCTTGTGCACCCTGAAGGGAAGCAGTATCCTAACCACCACAGGACTGAG
TGTTACCATCATCACGCTCATACTGACCATTATCTTGACCATTTTATGTTGTAGAAGGTC
TAAACACTTGGACGGTGTC
>NODE_30300_length_41_cov_194.951218
AAAAACAAACAATGCATCTCTAAAGACTTTGTCTGTGATGGTACAAAAGACTGTGATGAT
TCTTCAGATGA
>NODE_30301_length_121_cov_3.438016
GAAAAGACATTCGAAAAGTATATTTCAACCCAATCCATTGCACTTTCAAACTTTCCTATA
GTATAGTTCACCGCGAAAGATGTCGATTTTGTTGCGTCATCGTCTTAGAACACTTGCACT
GTGACACAGCAACACACTAACGCGGATACAC
>NODE_30302_length_45_cov_45.377777
TCTTTAGAAGAGGCAACAACTCTAAGCCAGTCACGGAGGTTATTCTTTTTCAAGTACTTC
TTTGTCAGATATTTG
>NODE_30346_length_47_cov_283.808502
CCTTCCCACGACACACTCTCCAGGATAGTCGACCCTGGGTCTCAGGTGGACCGGCTTGTG
ACAGTTTCTGGCTCTGA
>NODE_30348_length_33_cov_53.151516
CAGTTCCTTGCGGATATGCATACAATTGGCTTGGCTCTCCAAGGCATATTCATACAAAAT
CTT
>NODE_30397_length_85_cov_252.411758
TTCGCACAATGAGGTGATCTAAACTCTCCAGCAAAATTGTCCAGTACCTGACGAACTCAA
AGTAGGCCACGATCCCGTCGTCGTTGCTGTCCATCAGGGCGAAGAAGTTGTCGAA
>NODE_30408_length_65_cov_89.553848
TCATTAGCAATAAATTGTTCTTTTTATTAGTCTCTTTTACTATATAAATTGTAGAGAGTA
AAATCTGGATGAATGTATTTGTGTCCAGGGAATCA
>NODE_30444_length_133_cov_53.082706
GGACATTCACAACAGGGGCCGGAACATTGACTACAGGTGCTGGTAGGTTCAAGACTGCCG
GTTGAGCTTGATAGACTGCAGGTTGAACGCGCACAGCAGGATTAATTTTAATGACTGGCC
TGACTTTGACAATTGGTCTTCTTACTCTGACGGCTGGTCTTCT
>NODE_30445_length_71_cov_1.929577
CGCTAACGAAAGGCCTTCCAAAAATAAGGACACAGACAAGTTCATGTGTGTAAATTTGTT
TGACGTGCACTTGAGTGACTGCTAAATAACTCGTTAGTTTT
>NODE_30446_length_115_cov_3.295652
CTACACCAATCAGATAACAAAACTAACGAGTTATTTAGCAGTCACTCAAGTGCACGTCAA
ACAAATTTACACACATGAACATGTCTGTGTCCTTATTTTTGGAAGGCCTTTCGTTAGCGG
CCTAGTTGTTGGAGGCCTTTTTTTA
>NODE_30447_length_132_cov_4.659091
AATTGACTGGTTCAAAGGTCATCAGACTTCGGCTTAAAGGACAGATACCCTGACGAGTTC
ATCAGAAAGTTCGAGTATGTTAATACACTTTCATCGTCAATCATTTCCTTCGTGCCTTGG
ACTGCGTCTGAACAAAGCATCGTGAAGTCGTCATGGTTGTCA
>NODE_30448_length_31_cov_34.709679
TGTACTCAAAGGTACACAGGGAGCTTGTACATGTACTCAAAGGTACACAGGGAGCTTGTA
C
>NODE_30456_length_32_cov_222.468750
TTTTTCAAATCCTCCTTTAATGAAATGATTGCAGTTTCAGTCCCACAGTCAGCCTGGTGA
AG
>NODE_30478_length_36_cov_10.250000
AATAGGGATAACAGGGTAATAACAGGGTAACCCTGGATTAAACATGTTCAGACTTGTCAT
TGCCCT
>NODE_30504_length_96_cov_77.770836
TTTTTTTTTTTTTTTTTAAATAGACCACCAGTTTTATTAACTCATAAATCCATTAACTAG
CAGTCTGCCTCTCTTTCCACAAAATAAGGGGTCCGTGATTTGGCTTGTACTGAACACCAA
CACCAT
>NODE_30507_length_40_cov_86.050003
CGTGCCCGTGAAAATCACGAACAGCAGGTCATTGAAGCTCTCCGTCGTGCCAAGTTCAAA
TATCCTGGCA
>NODE_30511_length_31_cov_190.516129
AGCTGAAACAGAGATTAGATGAATGTACAGCCCGTGTTGAAAGCCGGACCAAGACAGCAG
A
>NODE_30533_length_436_cov_84.841743
GTCATGTGATCACTTGGTGAGGGTGTGGTCGAGGGTCACGTGTCTTGCTCACGTGTCGGT
CTCGTGTGGGCCAACTCCAAGAGGCACTCAACCTGCGAGTGGTTGGCAGTCAACCCGGAA
AGTGGGGAGGTTTTGTTGGCACGGTGAGGTAGCTGTACAGGACAGGTCGTAGGTGCCCAC
CAGCGTACGCAGCTGGCGACTCAACTGCCGTCCTATTTCAGAGCACTGGTCTGTTCTAAG
TGCCGGGCCACCCGATCTACTAGACAAACGGAGAGTGACGGAGTTTGCCGAGTTTGGAGT
GACGAGGGCGGGCCTGACTGGAATATTGGACTGAACGTTTGGCCTGCTGAGTAAAACATT
GGACTGGAAGTTCGTTGGTGCAACACGCCTTGTTGGCTGCTGCAGTGTGTCCACCACTGG
CCGGTCATTACAATGAACGTCGGGGATGGCAAGGCATTGGCGCAGG
>NODE_30543_length_43_cov_147.674423
GGCCTTGGCCTTGGGGCCCTGCACCTTCTTCTGGCCTATACGCCCTTTCTTCTTCCCCAT
TGTTGTGCTGACT
>NODE_30559_length_37_cov_82.702705
GCCCACAGATGCTGGAGGTTTTATCAAGGTCAATGCCCTCAGGCTGAGGGAGTATGCAAG
ACTTCGC
>NODE_30560_length_58_cov_131.655167
GGATCACTAGCCTCGTACACGCAGATGTGTTTGTCAGTGATCAGCTGACCGTACAGCGCC
CATCGCAGGTTGCACTGGCTCCTGGTAA
>NODE_30572_length_135_cov_142.214813
GTGCAGCCTGCTGAGCTGGCCCCAAAAGGATCAAGTTTCGCCAACGAGCAGTGCATCATC
ACCGGATGGGGTCGCACCATCGGGGGTGGACCGACCGCTGCCCACCTCAAGCAGGCCTAC
ATTACCAAGATTACCAGGAGCCAGTGCAACCTGCGATGGGCGCTG
>NODE_30573_length_127_cov_5.716536
GCCGTTGTCAAGAACGCTGATGGAGCTGAAACGGTACATTCAAGAGAACGAACAGGGCGA
TCCGTTGATCCATCCGCCGGACAAGAAGAACAACCCGTGGGCGGAGAAGAGCAAATGTAC
AGTCATGTAATCAGCATACTTATTTACTCTCAACAAC
>NODE_30574_length_31_cov_3.580645
TCCTGTCGTAGTCAAGCACGTCCAGGTGGACGTCGTTGTTGTAGTCCAGCTTGGTAAACA
G
>NODE_30637_length_146_cov_9.061644
AATAAGCTTGTGGGCTTGACTTTCTTTATGGCATGTAAGTGCCAAGGCAGCATAGGTCCT
CATGTTAGGAGTCAAGTTTAGTTTGGACATGATTGGAAGAAGCGCCATGGCAGTATCACT
TTTATGTCTCTTATTTCGTCTCATCATGATATCATTTAACAGATCTGTATCTGGAG
>NODE_30648_length_114_cov_193.710526
GTACAGAGAGGTGTTCGCACAAGGTGGTTGTGCACCTTTGCCACAGTCCAGAATGGGCAT
CCTTGTCATGGTCCACTTCCCACTTGGGCGTGGCTAGACCAACGATGTGAAGAACAAAAC
CCATCGACGACAGGACGATGCCAA
>NODE_30653_length_140_cov_13.964286
TTTTTTTGTGAGAGATTTACATTTATTGTGTAAAATAATATGGCATTAAAGCAAACAAGA
CAATGTACATAGGACAATTTAGAATGGCACATGGCCATTATAATTCAGTATAAGCCAGTA
TAATTAAGTGTCGTTCATTTCAACATTGTGGAGTTCCCTAATCTTGTCAA
>NODE_30662_length_218_cov_12.266055
CCATTGTGGCCAACTACATCAAGGAGCGTACCAAAAATGCTCAGTTCATCATCATCTCAC
TGAGGAATAACATGTTTGAGCTGGCCGACAGGCTTGTTGGCATTTACAAAACGCATGACA
GCACCAAGTCGATTACCATAAACCCGTGGAAGATGGTTACCAGTTTTGTTGACAAGATTA
GGGAACTCCACAATGTTGAAATGAACGACACTTAATTATACTGGCAAGATCGGAAGAGCG
TCGTGTAG
>NODE_30665_length_252_cov_10.162699
GCTGTCCTCGGTGGCATTGCTGGCTCGCGTGGCATTGGTGACATCTTTGCTGGTCTCTCC
CAACAAATCAGCGGTGCCGTCACTGCTGCCCAAGGNGGAGTTGCAAGAACCGAGCGAGAG
GCTCTGGTAGTTGTTGCAAGTACCAAGCTAGCAGCCACCAGCAATTCACTAGCCACCTTT
GCCACGAGAAAAAAGGGAATAAGCTTATAAGTAAATACGAATAAGTTTAAAGGAGAAGTG
CCTACTACCCAAAGACTTTCGTGCAGTTATTTTTGTAGGGGC
>NODE_30687_length_60_cov_104.849998
AAGTACAGCACGACCTCCCCGCCCTCAACAATCACAGAAGCTGTTACCAGGCCAGCGCTG
ATGCCAACTGTATTCAAGCTTCAGTCATTG
>NODE_30723_length_69_cov_49.521740
AGAGTCACTTTGTCACCAACCACAAAACCAGTCCCATTGTCTTTCAGCATTTTCTCGAAA
TAGCCGAGAAATCTTGGACCGGCCTCTTTCTTGACCTCT
>NODE_30724_length_129_cov_2.705426
GCGCTCGCTGCGAGTCACCGCGAACGATACGCACTCATTTGAAAGTTTGGCGTTGTCCGA
CACATTCAATGATTTACTGTCTTACGTTGTATCGCAGCGTTCCCACACGATTTACTTCTT
GCCAGCCTTGACGGCAGCCTTGGTGACCTTGCCACCGGA
>NODE_30725_length_112_cov_5.964286
TCCAGCCACATCGCCTGCAAGTTCGCCATGATCGAGTCCAAGATCGACCGTCGCTCCGGC
AAGGAGGTCGAGAAGGAGCCCAAGGCCATCAAGTCCGGTGATGCCGCCATCGTCAAGATG
GTCCCCCAGAAGCCCATGTGCG
>NODE_30766_length_39_cov_307.051270
TGTTTAAGGCTTCTGTCCTTGGCATTCACATTTAGTGGCAGAGACATAAATGTGCGGGGT
CTCTCTTCA
>NODE_30767_length_111_cov_58.243244
AATACGACATCGAGAAGGACAACAGTCACTGTGTGGGTGAGCCTGTGACCATCGGCTCCT
GCGGTGACCTGCTCTGTAATGGCGAGGCCGGCACGTGCTGCAAGGCTGTCACCTTTGAGA
AGATCCAGGTCAACGTCCGAT
>NODE_30786_length_73_cov_3.904109
AAATGTGACAACTGAACTATGTTCACCTCTACAGGACTTTATTTACACCAATCAAAATAA
CAACATTCAATATCTGTAGTGGAGAAAATATGGTCTGCTTTCA
>NODE_30787_length_62_cov_2.967742
CTTGTGATTTATTTACATATTTCCCAGCTGCAGACAGCTTTCATTGTTTATATTTTTTCA
CTCATTCACTGAACATACAGCAAATTTGGCTA
>NODE_30827_length_31_cov_18.935484
GAAGAAGAATCAGAGCAACTTGCAGACAGTTTCTGTGACAGTAACATCCCAATAGAAGAG
T
>NODE_30828_length_172_cov_1.906977
AGGATCTTAGGTCAACTGTGCTGGACACGGTCCACTCTAAGGCCATATTGGTTTGGGTGA
CGACAAACTTTGTGAAGGTCAACTTTTTTGGGATGTAGTAGTTGGGGCACTGTGGCATTG
AAGGTGATATTGAACATATATAGCCTGATGTTTTATTGGACAAGACTTGGCCATCTTGAC
ACTTTGGTTCATATCCTGGGGG
>NODE_30829_length_152_cov_67.078949
TTTTGATAAGTAATAATCCTTTATTACATAGAAAATCAAGATTAAACCGTTAACCTAAAC
ACCTCAGGTTTATTAACAAATGGTTTGTCAAATACAATTGGTGGTTTCATGGGTCGTATT
TTCCTACCATGGTATCCAGTCTTTCTCTGCCACCAGCCACTGTGTGGTCGTTTACCTCGC
CA
>NODE_30862_length_257_cov_3.003891
CTTCATCAAGAAGAAGTTGCTTGTGGTACCATATCCAAGATCAAATCAGAATTCTTCGCG
TAGACTCTTCCAAACTCCAAAATGGCCGATAAAGACGACAAAAAAGCCAAGAAGAAAGCC
CAACGTGCCACCAGCAATGTCTTTTCGATGTTCGATCAGAAACAAGTGCAAGAATTCAAA
GAGGCATTCGGTCTCATGGATCAAGATCGTGATGGCACCATCAGTTTGGATGATCTGAAG
GAAGTCTATGCTTCACTGGGCAAGGCACCGAAAGATGCGGAATTGAA
>NODE_30863_length_63_cov_2.841270
CCGGTGGCGTCAGGGTCGAAGTTTTTCCATGCGTTCAGGATGACGTTCTCTTCATCGGTA
CCATTCAGTCGGTCACCGAACAAGGTCAAGAGC
>NODE_30865_length_71_cov_1.971831
CAGATCTTCAACAATGGTTAAATACTCATTGTCCAAGGCAATTACTTTTCGAGCAACCTC
GTAGTCATTTTGACTATGTAAAACATATTCATTTCCAATCA
>NODE_30869_length_32_cov_15.250000
TTAAATCTGTTACCTTGACATGACACAAGCTTCACTTGTTGGCTGAATAGATCTACCTAC
AC
>NODE_30873_length_68_cov_71.779411
TTAAGGTTATCATAACTTGGAGGTGATGGTACAACGCCACCATTCTGAGGATAGCCCCCT
GAAGCTTGAGGGGGGTAAAAAGCTGGACCTTGTTGAGG
>NODE_30875_length_44_cov_69.454544
AGCCTTCAGTTGTCGTAGCTCAAAGTACATCAAGCTCTCAAGGTGGCATGGTTGCTACAG
GAGGCTACCAACCC
>NODE_30901_length_168_cov_61.380951
GATGAGCTTGTCTGTGCCAGAGACGGAAGCCGGTGTATTCAAAAGATGTTACGAAACCTG
GAGTCGCTGCTCCAAGTGGAGCAAACGACTGAGTGGCGTACTTTGGAAGACCTGTGATGA
CCGCTGCAAGAAAGATTTCAAGAAGAAAGGTGGCCGATGTGTCAAAGTGCGTTCCAAATG
TCCCTTGTCCAGGAAAGC
>NODE_30902_length_71_cov_2.845070
GTCATTAGTCAAGTAGCCCCAAGTGTACTCATAAAGATTATCCTTTCCAACCCAGGCCAT
CTTTCCTCCGTGCCACCAAGCTTGTTGCAAGATGGTTTGAT
>NODE_30903_length_97_cov_3.340206
CAAGTCCCTGCTAATGGTGCTTGGCATTTTACCGATGCTTATGGTGTATGGAACGCTATG
ACTGATGGTGGAACGTGCTCTTCCACCGACAGTGATGTGCAACCTAAGTACAACACCCTC
CTCTGCC
>NODE_30904_length_32_cov_58.656250
TCTGACAGCGCAGAGTGCCTCAGTGGTTGCTGTAAAGTCAAAAGTCTGGGTCGCGGAAAA
TA
>NODE_30906_length_48_cov_18.375000
TGTTATCCCTATTTTTTTTTTTTTTCTTCAAGTATTATTTCTTTAATGTGTATTCATGTC
AATATAGGAATTCAGATC
>NODE_30945_length_104_cov_79.913460
AAAAACAAACGCATTTCAGTGATGGCGCCGTCACAAAGACTCGCGAGAAAGGTAAAACCG
GATGCTTTTACTGGTTCCTCATTCGTGATGGGACTTCAGGATACGACATTTAAAGAATAT
CTCACTGAGCAAAA
>NODE_30946_length_70_cov_2.200000
CAAATCGATGGTGAAGTTGATCTGTTTCTGGTAGTTGTCTTTTCCGATGCTACCGGAGGA
ATCCAAGACATAAATGAGGTCAACGACTGCCGTACAAGTT
>NODE_30995_length_44_cov_49.431820
ATGCTGCGTGGGTTTATCTTGGTGTTAGTGGCAACAGCGGTTACTGTTCTTGGTCAGCAC
ACGTGTCCAGTGTG
>NODE_31011_length_65_cov_3.461539
CTCGGCGCCGGCCTTGCTGTCGGTCTCTCTGGTCTTGCTGCTGGTATGTGCATTGGAATT
GTTGGTGATGCTGGTGTCCGCGCTTCCGCTCAGCA
>NODE_31035_length_64_cov_47.421875
AAAAAAAAATATCTTGAAACTCCCAGCTGAAAACAGCTGTCATGGTGACGGGTTGATCAT
CGAGCCGATTACTGGTAATGAAGATACATGGGGA
>NODE_31038_length_43_cov_13.744186
GACTTCATTCTCGTCACGTGACAGAACTGCAGCTCTAAAGCCAGGCACGAAATCAGCTCT
TGAAGAAGTTTGA
>NODE_31055_length_31_cov_1.000000
GACATCAAGTGTCGGCGACATCAAATCATCGACATGAAGTCCATCGCTGTTGTAGCCTTC
A
>NODE_31119_length_50_cov_71.639999
TTCTGTAAAAAAGATCGTAAATGTATCTGGACTTCTGATGATGGAGTCGAAATATTGGCC
AAAGTGCTTCTACTTTACGC
>NODE_31128_length_66_cov_5.924242
CCTTCATGGGGTTCTGTCTCAGCTTCCCTCATCTTTTGATCCAGCTCATCCAAAGTAGGT
TCAATAAGTTCCCATCCATCAGGTGGGGGTTTTCTA
>NODE_31143_length_34_cov_10.117647
TGCTGACTACATCTGCTCTATAACAAAAACTATCATCAGAATGGCCAGCTTCACATCTCT
ACCT
>NODE_31162_length_65_cov_2.446154
GTGATCGATCGCGAGATGATGGACGATTACGACGTGGTCGTGGTGAAGCGGATCTTGATC
GTTGACGATTATCACGTTTATTATGTTGAACTGGA
>NODE_31163_length_159_cov_30.735849
ATATGCTCTGATGAATCGTGGTCAGTGATAAAAAGGCTTCTGTCGTCTTCATTGACGACC
ATTAGCTGACCTCTGGTCAGCTCAGCACTAGTCTGGTGGNACCTCTCAGTTCCAGTCCTC
GGGGGTCCAGACAGAAGAGGTCGACAAGTCTCTACCCAGATGACCGATAAGACAGAAAGT
ACGGGTCGT
>NODE_31175_length_110_cov_115.572731
TCATTCTACCACGCGACCCACCACAACCAGAACGACTGCGTGGTGATTGACTTGGAGTAT
GACTCTAAGTGGGCGGAGTACCCTTGCGACCAGTCCACTTCCCTCTTGTTCTTCCCTGAC
AGGGAGGATCACTACTACGT
>NODE_31230_length_112_cov_165.008926
AAAACCCCTTATCTCAAAGACTGGTGTCACCCTGTGAGACGGCGTGCCAGAGGAAGTCCC
TCTTGTGCACCATCTCGATGGTGGTTTACCAGGGACAGTGGTTTGCCAAGTGTGATCAGC
AAGGCAACTTCCTACCCCAGCA
>NODE_31255_length_341_cov_7.316716
AAAAATAGGGATAACAGGGTAATAAATTTCGGTCATGGGGTCTCTTCATGCAAAGGCACC
TGCTGATCCCCAGCCAAAAGGTGTTAAAACATCGATTAAAAAAGCAGCAGAAAAGAAAAA
AGAGGAGGTTTATGTGNATCAATGGACAGTCTCAAGTTGCACACCAACAACTGCCTGATT
GTTCTTGATTTCTACTGTAATAATAGTTCCTTTAATTTGGTAATGAGTCACGGTTCTGGA
AACTGCTCGAACAAGTCGAGTCGATACCTCGTTTTCAGTTTTACCTCGCAGAACCAGAAA
AGTTTTTACAATAATATCGTTAGCTACAGTCATTTCTGTTTTTTCTTTTACCCATACTCC
AGAACAAACTT
>NODE_31274_length_40_cov_59.625000
GTCCCGAGAAATCATCTATAACGGAAGACAATGCTTAAATTCCTGACTATCCTGATGGTT
GGCGTTTCTT
>NODE_31282_length_102_cov_59.892159
CACAAATGACGTTGAAGAACAAACTCTAAGACGGCTGTGTAAAAGTTGAGCAGGTTGGCG
CTGACGAGCAGAGACGTGAAATTGCTCAGGTCTCCTCGGCTGAAGCTGAGCTGCGCCGTG
CTGGACGAGGGC
>NODE_31327_length_221_cov_3.506787
CTTTAGTGAAAGAAGGATCACTAAGAGCAGGGGAGCAAACTAGGGCAGAAGCAGTTGAAA
AAAGAGCGAGGAGGAAGGCCAGGCAACACTGCCCCACTGCATTCGTGTGTGTGACATGCA
GAATAGACTGCCACTCAAGGATTGGTCTCATCAGCCACACCAAGAGCTGCAAATAATAAA
GATAAATATATCGTCTTTCGTAGACGGACAGATGCCATACCATTAGTATGGATTCATCTG
TGTTTGGGATC
>NODE_31328_length_116_cov_2.284483
GCTCTCTCAATTCTGTTGCCCTTCTCAAGCCAGGCTGTTCCCGTGGAGCCAAAATGCTGG
CGCTCTGCTGACCTTTCTTAGTTTCTTCAATGTTCAATCTTTCTTTACCGTTTTCCAGAT
CAGAGTCTTGTTTTGCATTATCTCTT
>NODE_31329_length_31_cov_41.580647
CCAGCTTGACGCATGTAGTCTTTTAGATCCTGCCAACTGACACGGGAGGAAAGATTTTCA
A
>NODE_31330_length_170_cov_79.870590
ACGTTTCACTGCATGCTGTTCGCCCTCACGCTTGTCGTTTGTCATGGGCACGATTACAAG
ATAACCTTGCCTAACCACATTTACCAGGGTTTTGCCAATTGCTTCAAATGGTTCGATGAG
GATCGCAATCGATATTTGGACATGAGGGAGTTCTTTAACTTTATGATGGGTCAAAATCCA
AAACAAAAGCAGACTTTGCA
>NODE_31331_length_43_cov_46.046513
CATGTCCAAATATCGATTGCGATCCTCATCAATAACCAAGTCATTGTTTCTGTTTGCCAC
TTTGAAAAGCTGA
>NODE_31334_length_128_cov_55.851562
TTTGAACAACCACGAACACCAGAAATGCCTCGATGACCGTGCCAGGGATCCTTGTGTTAA
TGCCCTTGGTACGGTGTCATGCTGTGTTCTAGACTGCTGTGAAACTACATCTTGTCTGAG
TGCGCACTTCGGGGCCTACATGGGAAACATTATCGGCA
>NODE_31359_length_39_cov_100.333336
TCAGCTATTTGGGGAGCTATCCACAGAGGATACTGGAGTTGGGCTTTGAAAAACCATCAC
GTCAAAGTG
>NODE_31373_length_137_cov_62.124088
TCCAGCAGGTTGTCTCCGTTGAAGTCGACCAGGGCGAAGAACAGGTCGAAGTCGGTGTGG
TTTACGTGTTGGTCGTTGTTGACGTCGTTGACGGCATAGAGGGCGTGGAGTAAGTGGTTG
AAGTCCGAGTTGTGGATGTGGTTCTGGTTGACCAAAGTGGTGAACTC
>NODE_31377_length_271_cov_3.977860
CTTATGTAGGTTTAGTAATGAATAATCCTAGCATGGAGCTCAAATTGACTGTCTGAGCCC
ATTTACCTGTTAGATTTACCTGGCCCACACAGAAAACCATAGAGGATCTCATAACAGAAA
TCAAAAGAGACCATTCATACAGCAAAACAGCAACCCTCATTGCAGCTANGTAAAACAACT
CGTCCAGGTAGTTGCTCATGGACTTCATTCACCGGTGTCAAACGACCTACGCCCAGTACG
ACCGACTGGGGACCCGTACGACCAATGTCCCTTGTCTATGTTTGTCTTGTTCTCTCTTCT
C
>NODE_31378_length_62_cov_3.451613
ACAGCAAAACAGCAACCCTCATTGCAGCTAAGGTAATTCTAGGAAGTGAATCCCAAGCCT
CAGACTGACCTGACAAAGTGAGGCGTGCCGTT
>NODE_31426_length_61_cov_124.377052
CATTACCTCCGTTATCAATCTTCAACCGGCACTTAGGTTTAATGGTGGCGGGCACATTAA
TCACACCATATTCTGGCAGAACCTGAGCCCT
>NODE_31442_length_77_cov_153.961044
TGAAAGGAAACAAGAAGTGTTGGTGAAACTGGACATTGAATTAATTAATAATCAGCAAAA
ATCTGCTAAATCCAATGATGGCTGCTTTGGTCACTGCACTTTCTGTT
>NODE_31510_length_31_cov_188.677414
ATTTATAACAAGGAATATGTAGACCGACGATGGAAGTTTGAATGCAAAGAAGCTGGTGTT
A
>NODE_31545_length_71_cov_1.802817
CTCAAATGGGTAATGGGTAACATAGTATTTTTAGCATTCAAAACAGAAAGCGAGACAAAT
AAATTACTGACATACATCGTCATTGTGAAGGATAATTAATT
>NODE_31547_length_31_cov_2.032258
ATCACAGTTCATCACTCATCACAGTTCATCGCTCATCACAGTTCATCACTCATCACAGTT
C
>NODE_31566_length_81_cov_50.839508
CCCTGACCTGCATTTTACTGAGCTTCACAGGATACACAGACTTGCTGCAAGGAACCGGGG
TCAGCTTACCTAATATTGCAGCTATCGCAATTTTTATCTCCACTAAAGCCA
>NODE_31573_length_44_cov_49.386364
AGAAATCCATGGAGTTCACATCCCAAAGAACATGGTTGTACTTATCCCAGTTTACGCCTA
CCATACAGACCCAA
>NODE_31601_length_37_cov_50.864864
AAAATAGGGATAACAGGGTAATAAGAATGTCTCGGTGATGCATGTGAAAGCAGTATAGAA
GTAAAGG
>NODE_31618_length_396_cov_4.141414
GTCTTAATGTACAAAAAGGAATGCATCAAATTTTATTTTTAAACGTGACAGCATGTAGCA
TAAGCCTGGACTCCAATCTCAGCTCCGTACCTCGGGTAGCCGTTGACCGCAACACAGTGG
TCCACGCCATTGGTGGCTTCAATAAAGGCACCGGCCGCCTTAGCATTCTGCGTGTACACG
TTACATCCGGTCATGACCTGCCCGGCCGGACACTGAACAGTCGCTCTGGNAAGGTGGGAA
CGTTGTCCGCCGCGTACTCTTGTGTGGACCGGAGCCCAGCAGTAAGACACGATATGTGCT
CAACAAACATTTATACCTCGGTAGGCTCAGCCTATGTATTCTCATCCGGCTCGTCGGATC
TCCTATAGGTAGACGCCGCGTACCATGTTCTTGAACCAATAGATGTGGCCAGGGACGTCC
GGGCCG
>NODE_31674_length_198_cov_1.722222
CAAATATAAAAACAGGAAACTTGACACTTGGAAAAGTATGTGGGCTCGGAAACACCGTAT
CAATAACCCTTTTAAGATTAAGTCGCCACATCAGCCTGGTGCCTCGAGCTCTATGTCACA
GAGTGTCTCCCCTTCAACATCAGCTGATCTCAAGTCTTTAGAGAGCAAAACAACCTCAGC
TACCTTCTTCACAGGTACAGCTGAGGTAACACAATTACCATCAATTAC
>NODE_31701_length_64_cov_2.078125
TACACATCCGTGTTGTGGGCAGAGTGCAACAAACTTTTAGGTATCCATCACAAAATGACC
ACTGCTTATCATCCACAGTGCAACGGTATGGTCG
>NODE_31736_length_35_cov_152.314285
GGAATAACCCACATTACATCAAGAAAGCCGTCAGCAGCTCGTGCTCTTCTGGGAAAGACT
GCGCA
>NODE_31800_length_69_cov_127.028984
TTGTGAAACAGCTTCAGACTGCACAATTCCTTGTTCTCCACTACTGGGTAAGGGAGGCGA
TCGTTACCAAGTGCTTGTCTTCCCTGATTTGACATCCCC
>NODE_31801_length_106_cov_4.311321
GGGTAATAAAGTTTAGCTTGTCTGAGATTATAGCAGCTGGTTCCCAGGCTGGAGAAATTT
CATCCACTTTCACATTGACATCTGCCATGTCTCTACTACACTAGTCACTACAACTACTAT
TAAACTAAACACAGCG
>NODE_31842_length_156_cov_18.711538
GTGGTAAGATTGGCCTGCTGCACTGTTCCATAAGCTGGAGTCTCTTGGGTACTGTAAGCG
CCATATGTAGCACTGACATCTTGAACGCCGGTAGTTCCCTGGCCAGTACCATAATATGCC
TGGTTGGTGTAAGCTGCATCAGTTGAGTAGTTGGGTAGGGAACTACCGGCGTTCAAGATG
TCAGTG
>NODE_31846_length_96_cov_41.250000
TCCGAGAGGCAAAGTGATCGACAACGAGGCTGCCCTAATTTGTTTCGCGCACGAGTTCCG
CCGTAGAAGTATAGGATGCTGTTGCCCCTGCGGATCAAGCAGCAGCAACATCGCCACCAC
CCACAG
>NODE_31860_length_72_cov_72.833336
CTAAAAAGACTGTAAAGGTTTTAGTGGTCGGCAATCCAGCCAACACAAATGCCTGCATCC
TGAGCAGATATGCTCCATCCATCCCCAAAGAAAATTTCACAT
>NODE_31909_length_37_cov_308.054047
CGAGATCTTCTGAACTTGGCCACCATCATCAACGCCTACACAGGAGATCGGAAGAGCGGT
TCAGCAG
>NODE_31920_length_43_cov_108.488373
GCTGAGATGTAACGGCCAAGGCGTCACCCACACCTCCCCAGCCCTCAAGGATTCCGTCAC
AGTTCTTTGGACG
>NODE_31921_length_64_cov_49.375000
CTCAAGGATTCCGTCACAGTTCTTTGGACGGCCCCAGCGAATCTCACATCGGGCGCTATT
CAGTTCGTGGCCACAGTTGTCAGAGAAAGAATTG
>NODE_31929_length_348_cov_25.520115
CCCTATTTTTTTTTTTTTTTTGTTGTACTTATATGTTTATTTGAAGTACATGTATTTAAA
ATAAAGAAGTCCTCTAGTGCTCACATCAACGACGTTAACTGTAATGTAGTGCAACTACAA
ATCACAAATGTAATACTTCCATCTCCTGTCCTTGTGTTCGTTGTGAGGATAACTAAACGC
TCCCTTTAGCACAGACCCAGGCGGGACAATCAAGAGTAACCTTTGATCCCAGTCATTTGC
ATAGTCGGTGATGTAACAATTTTTAGGTTTTTTAGATGGAATGCCGCAACATCTAAATTT
GAACCGTCTGTCTTCCGATCCGTTGTCATGGTAACTGTCAATGCCAGTGACGACGGTGTC
CCCTGGACAGATGTAGAC
>NODE_31939_length_128_cov_53.554688
CTGAGTTTCACAAGTAGTATGTACGTCCTATCCTTCACTTAACAACAACATCTTTGATTG
TAGGGTCGCTGAACTTTCCCTGAAAAAGAATGTTTCCCGTTTCGTCATCTCGAATAAAAT
ACACGAAGCCACGATCAACCTTGAACTCAAAGCCAGGA
>NODE_31940_length_306_cov_14.741830
AAGTCGCACGACCTCCGAGCAATGCTGATGGTGCTGACAAAGGCTGGGTCGGGACCCTTG
CTGTTGTCGCAGACTACCGACTCGACCGGCCCCTGGTCCAGGATGAAGTTCAAGGTCACA
GTTTCAAAGGCGTTGACGTTCAGCTGGAGCACCACGTCATCCGTCGTCTGCTGGATGTCG
TAAAACCGTTTCACGGACATCGGCACCCATTTCTCGGGTTCCCCCAGTAGAATTAGTCTG
GACCGGAAGCCGAGCTGCAAGATGGGAGACGTGTAGTAGAGACAGAAGTCAACGTCAGAA
CAACTTGGGCCAAGGCTGAGGGGGAGAGACTCGGAG
>NODE_31941_length_34_cov_7.764706
AAAATAGGGATAACAGGGTAATCCATTCTCCGAGTCTCTCCCCCTCAGCCTTGGCCCAAG
TTGT
>NODE_31942_length_37_cov_157.675674
CGACCTCAGATCCCAATCTGATACCTTTACCCCACGGCAGGGCGCTAGAGGTTTCCCTCT
CTTTGAC
>NODE_31949_length_139_cov_48.474819
GACAGCATCGTATACAAACACCCTTAGGTATCTGAGATATATAATCTACTGCTCCTGAAA
CTCCTTGTTTCACCATCTCACAAATGTTTCATAGGTAACAAAATGTCCTCAACAACTTGA
TGACTTGTAACTGGAGGTCATGTCCTTATCTTACCTATACAGACGCTCC
>NODE_31979_length_44_cov_23.159090
TAAGAAAGGATCCATCACATCTGTGCAGGCCATCTTCGTCCCTGCTGATGACTTGACTGA
TCCAGCCCCTGCCA
>NODE_32014_length_32_cov_195.718750
CAAGTTTTATTGCCTGAGGCCCATGCCTACAGTCACAGTCTACAGTGCCCTACGCCTACA
GC
>NODE_32015_length_384_cov_5.973958
AAAATATCTTACCGACCATCGAGCTAGGAAGTAACTAAAAAATCAACTCATCTAATTTGA
CGTTCAAAGAATAGGGACTCGCTCTTAGAAACCGCTCGTGTTACTTCTGAGAATGCTCCC
AACAATGACAGTCGTGCTTCTACTTTTTAATGTGGCCCATATAAATGCTGCTTTTTACGA
TGCTGCGGCGGACTCCATGTTTTTGTGTACCTTTGGTAAGCGCATCATGCAGATCGAAGG
TGTTCAGGAAAATAACGCTGTGGACAGAACCTGGAATTTTAAATGTGGTGGATCTGGGGC
AACTTCTACGTGCAACTGGAGCCCCTACGTAAACAACTGGCACGAGATGGTGGCCTTCAT
TTGCCCAGGCGACGGTGTCATCACTGGTGTTGACAGTTACCATGACAACCTGGC
>NODE_32017_length_63_cov_112.888885
GAAAAGGTGTAACCATAATTGTTGTTACAGTTGACGTTACCATGGTGGTCGCAACTTTTG
GATACTACGTTATACTTGAGACCATCCGGGCAT
>NODE_32033_length_87_cov_171.390808
GGCAACTCTAACGATGTCCGTCGCTGTGAGGGGGACATCGTAAGACACGATGTTTATTCC
ACCTTTGTCGGCCATTCCGATCATCACTGTCATGTTGGTTATTGGTTTAGCCGTTGC
>NODE_32038_length_47_cov_73.106384
TTGCAATCAAGGCCCGGACCTGCTGGTAGCCCCTTACAGCAGCACAGAAGAAAAGCTCCT
GGCTTCCATGATCATTG
>NODE_32039_length_74_cov_102.540543
GAGACAGTCCAGGAAAACTGGGAAGACGTCGACCTTGACGGAGTTGGTCAGACACCTGCG
TTCCCGGGTGCTCAGCAGCAGATGGCCACAGCGGGACAGGGCGC
>NODE_32040_length_42_cov_139.642853
GCAGCAGATGGCCACAGCGGGACAGGGCGCTGGCCTTGTCACTACAGGAATTGAACACGC
TGGAGACCGCTG
>NODE_32061_length_82_cov_84.012192
CATATTTCTAAAATTTATTTACATACATTAAAATCACGCGCATTTTTACCATATCATTGT
TCATCTGTAAAAAACTTGGAGGAGTTGTGGGCAAGTTAGCCGACAATGACTC
>NODE_32134_length_32_cov_247.437500
CTCACAGTTCTGACTCTCGCCATATCCACACTAGTGCAGAGCATGCATGCCAATAGAAGG
AG
>NODE_32161_length_46_cov_174.478256
GTGCCCTGATGGAATGCTGCGTACGCAATAGATCATCCGGTCTGGGCCAATGCCTGCCAA
TGGGTAGAACAGGCAA
>NODE_32232_length_95_cov_73.547371
ATGATGACAACGTTATGCACAGTTCCGCATGGGAAACAAAGCTTTGCCACGATGGTGGAA
CATGTTGAAACCTTGTCTGTTAGCTAGCATCTCCCATGTTTTTGTATCCTGCTCTGCACT
AGCTT
>NODE_32237_length_78_cov_117.423080
GATCTCTTTAAAACTTCCAGAAATATGGACAACACCATAGCAGGTTATCAGAAGGCCCAG
AATGCACTGGAGAAAAATATCATGAGGAAGCATTGTGAATTCCTGCTC
>NODE_32275_length_41_cov_2.292683
GACTGAGTGTGGGGGAAGTATATCAATTGTACAACCAAATAACTGAGCAGTTCCAAGAAC
CTCCTTGACAG
>NODE_32310_length_70_cov_155.128571
GAAATCCCAACCACGTATCTGAACCGCCTCAAACAATTGAAAATGCATCGTTATCACCCG
TCGAGTGGCCACGCTTTACAAGAGATCAGCAATCTTTTCT
>NODE_32320_length_34_cov_228.823532
CCTCACTGTGTTCGGAGACTGTCAAAAGAGACAAATTTTCGGAGAACTGTCTATACCAGG
ACAT
>NODE_32360_length_258_cov_36.325581
AACCGATTTGCAATTGAGCTGATGAATCGCTTATTCCGTTGGCAGTTTTGAAAGCATCAA
GAAATTGTTTTGTGTAAGCTGTAATAGCTACGACACAGGAGAACAAGCCTAATGCACCAA
GAGCGGATAAACAGAGAAGGCAACCGAGAGTGCCACCAAGTGCTCCAAGAGCGCCGCCGA
GTGCACCAGCACCNGGCATCATACCTGCACCATGGCCTCAAGCTTGAGGCATACCAGCAC
CACCACCTTCCCATGCAGCTCGTCGCATGCTGTAAAATCAGATCTCTC
>NODE_32364_length_84_cov_3.000000
TCCGCCACCACCATAAATGTCAAAATTAAAACTTGAAGGACGCCGTAAAGTGGAAAGACT
AGAGATTGTGTGTCCAGTCTCTAGGCACTCAAATTCTATACTCATGGACAGAGC
>NODE_32366_length_36_cov_69.388885
AAACATCGCTTCACAACATTGCCCGCCTGAGGTTCGGCCACGTCGGAGCGCAGTGACCAA
CAAGAG
>NODE_32384_length_37_cov_214.378372
GAGTTAATGGAGTTAGCTACGCAAGTGGGACATCGTTGGGCAGACAAGTGGACCCTTGCA
ACAACTG
>NODE_32390_length_103_cov_3.961165
GGGTAATTGTCCATGTTGCTGCAAAAACCTAAAGCAGCCTCAGATTGGCGAAATGCGTGA
GACGTGGTGTGCTGTTGAAAGAATGAAAGAAGAGGATTGGTGTCGCAAACAAAGAGCACA
CATACCAAGATAT
>NODE_32391_length_98_cov_3.102041
TTGATATCTTGGTATGTGTGCTCTTTGTTTGCGACACCAATCCTCTTCTTTCATTCTTTC
AACAGCACACCACGTCTCACGCATTTCGCCAATCTGAGGCTGCTTTAGGTTTTTGCAGCA
ACATGGAC
>NODE_32503_length_132_cov_6.772727
AACACCTTTCTCCTGTGGGCCATCAGCCAAAACACACAACACTTTGACTGACGATAGTAA
GCGGAGACAAGCAGAAATGGTGCAGTATGCAGTAAAAATTGTTTTAAGTATAAGCAATGT
TCTACCTTGGTGCAGGAACAAAATGTGCTACAGTGTCACACA
>NODE_32513_length_57_cov_106.017548
CTATTTGACTGATACTTTTATGAACACATTGAGAGCAAGACACGTTCCTGCAAAGCTGCT
TAGTTTGCAAGGGGATAAGCCTGGAGA
>NODE_32514_length_42_cov_20.190475
AGTGAACAGGAGTCTATGGCCAGACTCAAGAAATTAATGACAATCATGGACAGTATGAAT
GACCAAGAATTA
>NODE_32515_length_33_cov_12.848485
ATCATGGACAGTATGAATGACCAAGAATTAGACAGCCTGGAGGGGGAAAAACTCTTCTCT
CGA
>NODE_32530_length_93_cov_1.849462
GGCATTGTGGTGTGTTGGTAGTCAAAGTCTCTCCTCCAAGTCAGTGGGAGACCTGAAAGA
CCATGGGCATCATGTGATACTTCCTTATTCAACAAAAATCTGCACCAATGCACTTCGAGT
CAG
>NODE_32531_length_49_cov_5.816327
TATCCCTATTTTTTTTTTTTTTTTTGGGGTTTTGTAATTTTATTTTAATAAAAAGCAAGA
GACCAAAGACCGAGTTGTG
>NODE_32567_length_70_cov_2.200000
CTTTCTACCCCAAGTAGGACCACAAGCTGCTTACCTCCCTTGATAGAGCGCTGCGAGTCC
ACATTTACCAGACTTACCAATTCAATGCTGTGCTATCAAT
>NODE_32568_length_71_cov_2.169014
CATCAACACGAAGTTCCTGCAGGCGTTCTGTCCCCAAGATCATGAAAATTCTCACCATGA
CAAATCAGATACAGAAGTTGATAATCCTTTGTCTAGCACTA
>NODE_32569_length_100_cov_2.150000
CTCTCGTGGCCCTATCATAAACCGCCATCGCATGCCGCGCCATACCGTGCTCCATTTCAA
GTTTGGCATACAACAGAAAAATTTCTTTGGCAAACTTTTCAGGGCATTTTTCTAAACATT
GTTCAAACAA
>NODE_32599_length_68_cov_1.338235
TTGAAGCTGGCAAATGTGCTGATATTAATCTGATATTTTCCAATGTTCGTGTCTTCTTAG
AAATAGTTAAAGTAAAATAAAATCATATTGAAACATTG
>NODE_32600_length_36_cov_283.694458
CTTGCCCTACAGTTACAGCTCGTGCAGACGTAGTCTGGTGCGCATAGAGTTAATGCGCAT
GGGTCG
>NODE_32611_length_110_cov_2.363636
ATAAGAGCGCCAAAAGCCAATAAGAAGCCAAGAAACAACCAGACCCTTGCACCTGTTTGT
CCTATACATCCTGTTGTGTAGGCCTCACCCCTAATTTGTCCATTTGAAACTGAGTTGATC
ATGAAGAAAGCTACAGTTAA
>NODE_32612_length_125_cov_1.968000
GTTTCAACCATGTCAGGTTTCTTAGATAACTGTCATTGGCCTAGATGTGAATGCATAGAA
CTTGGTGACAAAAGAAACCTTATCGTTTCAATCCTATCCGGCGTGATGTTTTTTGCAGGT
TGGTGGTTTGTGATTGATGCAGCAGCTATGTATCC
>NODE_32618_length_38_cov_300.131592
CACACATGACAGCTAAACAACTGGGTCGATTGTTTTCGCCACATTGACACTTTGTGCAGG
GGTCAATC
>NODE_32665_length_139_cov_5.028777
CACAGCTTCGTCTCTCAGCATTCTTGGGTTGCACGCCATCTCAATGAACCACTGCAGTGT
GTTCTTATAATCCACTGGGAGATTTGGGCAGTGATGTAAGGTCAACCCTGTGTCAGAAGC
TGTGGTGTGGGGTGATTTTTCCAGGTCTCTTGCAAAAATGGGACATTTC
>NODE_32667_length_38_cov_15.131579
CAGTTTTTCTGACTTCCTTGTATTCAATTTCATCCCTGTAACCAGCCAACTGAAATCTGT
AAGCTTCT
>NODE_32668_length_47_cov_3.212766
AAAGACATGTGCTGTTTGTTGCTGGATTTGATTAGTAGGCGATGACTTGATTTTTCTTCT
TCTTCTCCGCGCCCAGT
>NODE_32683_length_53_cov_78.943398
ACTCTGAACATGAAATAATGTACAATCACACAGTCAGCATCTCTTTCTCTCCAGAAATTT
AGTTTGATTCACATTTATCATCA
>NODE_32743_length_81_cov_85.444443
ACAAACCTTGTCCCCGCATCTACAGCCCTGTGTGTGCGAGTAACGGCAAGACTTACAACA
GCGAATGCGAATTCGAAGTTGCAGATTGTAAGAAACTAACCAAGGATATTG
>NODE_32744_length_91_cov_2.406593
CCGGCGTTCCCAAAGCAATCTTTTTTTCCTTGTCCTCCTTTAATTTCTTAACATAGCGTT
TGGCTAGCCATCGACGAAAGTTCTTTTGTAAAATGATAACTTTACTAAGTACAATGGCTG
C
>NODE_32758_length_78_cov_5.512821
AGCCAAGTAATTTGAAGCTGAGACATAAATCACAGATAATAAGGCGCCTTAAGTAAAGAA
CAAGTACTCGTACCTAGACGCCATTCTTGACCCGATGATAAAGATCAT
>NODE_32759_length_31_cov_18.000000
CGCCATTCTTGACCCGATGATAAAGATCATGGTCATCAAGACACCTCCTGGAATCTTCCA
A
>NODE_32768_length_41_cov_133.292679
TTGTTGGTGGCTGGGAGTTGATTGATTGCTTGAAGGTGAAGGATGCCGGTCAGGGCTCCG
GTGAAACCAGA
>NODE_32771_length_257_cov_59.906616
AGATTATCCGACGACTGTACAGGCGTGAGTTGTCCTTCCTGCCGTGGTTGGGATGTGTAG
CGCTACTTTGTCATGGAGGTTAAAAGCTCCCCGACAAGACGCAGACCAGCTATTGTGGGC
CGCTGTCAGGACCTCCAGGCCACCAATCGTGAAGGTATCGGTGGGAGCCGGGCCGCTAGT
GACTGACCCCAGGATCCCCGCATCCTTCTCATATCTGACATCCACGGCTGTCACTGTGTT
GCCGATGTCACTTTTGTACACCACATTGGTGGAGATTTCTGTGGCGT
>NODE_32772_length_436_cov_45.387615
GCCCAATCATCACTGGCAAAAGGCCCAAACTGATGGCGATTGGCGCGTATCTGAAGACCC
ACTTGGGTATGTGTTTGAACTGCTTCAGGTACGCCCTCAGCATTCCACTAATGTGAAATG
TTGTGAGAGTTGGCAGCAGAATTGTGGAGAAGGTTTCGAAGATGGCTGTATCCGTGGCCA
CTAGCAAACCATCGTACACACACGGCTGAAAGTGATCTAGACTCTTGTTCAGGGCGTGGC
AGACGACGAAAGTTATGGCCACCGTTTTGAAGGAGTCCTGGAGCTCTTTGCAGAAACGGT
ACCTAATGGCTACACCTACAGCATAGCCGTAACCTAAAGCCCGTAATGGGAACAAATTGA
AGGGGTCACATCGACCAGCTGACATAGAGGCGATGAAGTCAATGAATGTGAATAGCGGGC
TCCTGGCCGGCACAACACCTGACAGCTCGGACATCAGCTCGTCTTG
>NODE_32773_length_71_cov_1.338028
GCCGCCTACAGCTTGCTGGAACTGTGCAAATCTTTGAGCTGACGTCATCTGAGCAGGTCT
TTGGTCAGAAGTTATGGTTGGAAATTGACCAGTTGACCTTG
>NODE_32774_length_84_cov_1.250000
CCTGAATGGAACCTGGTAGACACTATCTCTTTACCTTTCTCTTACCTGTCTGTCAACTCG
AAGATTTAAGATGGGACTAAACAAACTAACTCTGACCTGCATACTAGGCATGGT
>NODE_32788_length_445_cov_31.267416
TTTATTTGGATCTGTAGCTGATGATCAAAAACTAATGATCTGGGACACCAGATCAAATAA
TACAAGTAAACCAAGTCACACTGTAGATGCACACACTGCTGAGGTCAACTGTCTATCTTT
CAACCCTTACAGTGAGTTTATCCTTGCCACAGGCTCTGCAGACAAGACTGTTGCGCTCTG
GGACCTTAGAAACCTTAAATTAAAATTGCATTCGTTTGAATCTCATAAAGATGAAATTTT
CCAGGTTCAGTGGTCACCTCACAATGAAACTATCCTAGCATCCAGTGGTACTGATAGAAG
GCTGCATGTCTGGGATCTTAGTAAGATAGGGGAAGAGCAATTACCAGAGGATGCCGAGGA
TGGCCCCCCAGAATTACTGTTTATTCATGGAGGGCACACTGCTAAGATCTCAGACTTCTC
TTGGAACCCTAATGAGCCCTGGGTTATTTGCTCTGTGTCAGAGGACAACATCATG
>NODE_32840_length_46_cov_53.195652
TTCATTCCGTTGAGCTTAGTTTTAACCTACTACAGGGTCGGTCTCATGGTTTTTAACATC
CGTGATGCTTCTAACT
>NODE_32854_length_473_cov_13.739958
AAAACTTCCGTGCTCTTTGTACTGGTGAGAAAGGTTATGGTTATAAGGGAAGTACATTTC
ATAGAATAATCCCAGGATTCATGTGCCAGGGTGGTGATTTCACCAACCACAATGGCACTG
GAGGAAAGAGTATTTATGGGAATAAATTTGCTGATGAGAACTTCAAATACAGACACGAGG
GTCCAGGGACGTTGTCCATGGCTAATGCAGGCCCCAACACAAATGGTTCCCAATTTTTCA
TCTGCACTGAAAAAACTGATTGGTTGGATGGCAAACATGTTGTGTTTGGCAAAGTGGTTA
AAGGCATGGAAATTGTGAGGGCTATGGAAGCNTCAATAATTAAGAAATTTAAAACATACG
TCGTTACTACAAAAGATCTTGTATAACTTTACTCTTTTAAAACTCGTTACATGTAAGACA
ATTTCTAAAAAGAAATTGAATAAACAAATATCTTGTTTATAAGAACTAAACAAAAAAAGA
TCATAAATAAAAACATTAAACGC
>NODE_32855_length_36_cov_40.555557
TGAGAGCCAATCATGTATGGCCTATAATGCCCCAGAGTCACCAATGACCACCTTACTTTT
AGGCTT
>NODE_32871_length_106_cov_9.650944
CACCCTGAACACCACTGCAGCCCCCAGCCCCAGTAGCAGTCAGTAACTGTTTCAATGGAG
AGATGTACTGAGATCTGGACTAACCCCAACAATAACTCTAAACTTTATGAAAAATGAGAT
TTACTGAGATCTGAAC
>NODE_32872_length_80_cov_6.212500
CAACAGCTAGTGCTAAAAAAACGACAAAACCCTCAACTGGTAGTGCTGCTGCTGCGACTA
CAACAACGACGAAAGTTGTGACGAAAGAACGTAAAGAAAAGGTTCAATCA
>NODE_32881_length_52_cov_50.596153
AAAATCCGGAAGTGATGAGGTAGGATTCCGTGAGCATGACAGCCGAGCAGAATGTGACCG
GGCCAGTGGGGGACGTGAACTG
>NODE_32902_length_95_cov_252.968414
TAAGCCTGTACTTGGCATCTTTGTCCTTCCTGCTTCTTTCTAAATGTTTACGGATGTTTA
CAGCCTTCTTGATCAAACTGTAGAGGTCCTCTGGTAAACTGGCAGCTAAGCCTTTCTTTT
TCAAA
>NODE_32937_length_135_cov_7.481482
CACGAAAGTAATAACAACAAAAGATTATAACTATAAGAAACTAGAATGTAATGATTTACT
TTACTTTGACACAGCATTGAGGAAGACGATACGATATTAATCGTCCGACGAAATAGTCTC
CATTTATCATCCCCACCTGGTCTAGTTTCAGCAGGATAAGAATGT
>NODE_32963_length_392_cov_5.683673
CACCGAACAAAACTTTTATAATTTTATTTGAATTTAACTTAATTCATCCGCGCTAAACTG
ACTGACCGTGGGGTCCGCCTGTTTCCCTTGAAACAGTATAAGGCCAGTCAGATCATCCCT
CAGGAAATAAATAAAAGGGTGGTCGGCCTTGAAATCAACCGTTGGTTCCCTTGGCGATGG
TCTGATTATGTTGGCAAGNGAAGACGTCTTAGACGCACTTGCTCTACCCATCTGGCCTTT
AAGGGCTTTTCAACCGGCGGACGCACTTCTAAAGCCCGTACGGGTCTAGCTAGTTTCGGA
ACAAGTCGAAGTCGAATCGGCACTCAAAGGTGAAGCCCTCGCATTCCAATTGGAAGCACG
AGAAGTTCGGGCACTTGTTTTGCAACTCCAGTTTCAGTAGGGGCTGCTCGACCAAGAGTT
TT
>NODE_33016_length_104_cov_8.990385
AAAAAATTACAAAAAAATAATAATAACATCAGTCATGTTTTAAAATCTGTTAACAGTTCC
AGTCTTGATTGAAAGCCAAATTCACAACCATTAAAGAACGAGCGCAAGATTTATCATTTT
ATTTTATTGTTTAA
>NODE_33021_length_31_cov_195.032257
GTTCTAGTACAATACTAACCTGTACCGACATCGACTGTCCCACACTTACTTGCCAGAAAC
A
>NODE_33048_length_127_cov_95.543304
AGCCTGTCAGATACATTTTGGTCAGCTTCCAGACACTAAATCCCAATATGTCAGACTACG
AAGAGAAGGCGTTGTTGTTCTTTCATCTGGCTGATGAGGATGGTAGTGGAAGCATCACAC
TGAAAGAACTGGTCGATGTACTGCACAAAGCTGGGGA
>NODE_33049_length_40_cov_86.275002
ACTGGTCGATGTACTGCACAAAGCTGGGGACAACAGCACTGAGGCTGAGATTAAGGAAGT
GTTCAGCACC
>NODE_33050_length_39_cov_63.282051
TCAGCGAGGAAAGATTCCAGCTCTTGTTTGGTGATGTAACCGGAACCATCGCTGTCGACC
TCCCTAAAA
>NODE_33061_length_31_cov_13.387096
AGGAGCAAGGACAGCGACTCTACCAACACTTAAACGATCATCAAGTTCTTACTGCACTCC
C
>NODE_33098_length_173_cov_3.971098
ATCTTTAGATGGGAAACTATATGTTTGAAAATGGTACAATGCAATTTCAAAAAATGGCTA
ATAAATAATTTTATTTCCCAACCACCATTAGTTAACATGAGAAGTGTCAGCAAAATCATT
CACAAAACTTTCACCATTGAGGGGCACTCTTTCTCTCAGAGGTGGGATCTAACACACAAT
CAAGATCGGAAGAGCGTCGTGTA
>NODE_33146_length_190_cov_82.573685
AAAGGTGTTTTAGCTGGTATGAATAAGTATGTCTTTTACACAAATGCGTTTCTCTAGGTC
ACAGTGGTATTTTTCTGGACACTTGACTTCGGGTGGCATACCGCGTAGAAACAGTCTCCA
ACACGACTCTCCCGGCTGGAGGGTTCTCACACACAAATCACAGCAACCGCAGTAACCGCC
TTTGACAACCACCGTTCCGTTGCAGCTGGTGATGGTTGCA
>NODE_33147_length_379_cov_9.266491
AGATAGTCTTCATTGGTTAGGAGGGGGGGCATATTTTTTTAATAAAAGAAATTCTTTACT
TGTTTTAACTTATTGTCACTATGGAGACCAAGCAGGGCCGTCACTTCACCATGGAAGCCA
AACAAGGGCGTCCTGTCACCATGGATACCTTGCCTTGTTTTCGCCTGAAGAGTCTCAAAC
ATCAACAGACCGGCCCCAAGCAGCAGTGACAGGCAGAAGACAAACGTACATCGTCGTCGA
GTCCTAACACCTGGTAAAACTAACGGTTTCAGATGTCCATCACAGCTACAGGTAATGTCC
CTAACGGTTTCTGATGACCATCANTCCATTACAGGGATTGCCAAAGACTACTGGTAGTGT
CGATGTCCATTACTACATGGATTGCCAAAGTCTACAGGTAGTGTCGATG
>NODE_33148_length_31_cov_25.129032
TAACTTATTGTCACTATGGAGACCAAGCAGGGCCGTCACTTCACCATGGAAGCCAAACAA
G
>NODE_33149_length_59_cov_51.322033
AAAATAGGGATAACAGGGTAATAGGTCATTAAGTTATCCTACAGCCAGTGGACTAGGGTT
GAAATCTTGACTTCTTTATACATAAGAGC
>NODE_33152_length_84_cov_54.214287
GAGTGAAAAAGAAATGTCGATAAAGTACGTGTTGGTGTTGACCGTCACAGTAACGATAGT
TGGTTTATTGGAGAAGGCTTCTGCGAGTCCTCACGTCATCAAGGACAAAGACAA
>NODE_33157_length_42_cov_19.428572
GTTTCTATTAATGTCCGAGGTGTGTACTAAACCAAATGTGAATCCATGGCTACCTGTTGA
TCTCTTGTCTTT
>NODE_33158_length_155_cov_2.677419
AATTGATCAATATCTGCTTGATTTTCAGCACTCAATCCTTGAACTTTACTGCTAATTTCA
GTATTGATCATATCAACTGCTGCTTTTACAGATGCTCTTGAATCAACATAGGCTTTTTGT
CTATCATCAAATGGCATTCTGAAGTTGTTTCTGGATATAATTGAAGTGCTTATAAGCTTG
GACAT
>NODE_33160_length_31_cov_15.516129
GTTTCCATTAGAACTTTCTCTGGGCTTGGTCGACTTAGCGGCGCCCATCTCCTCTCCAAG
T
>NODE_33176_length_31_cov_8.000000
CTATGTCAGCTGACCAAGATGTGACGTCATGAAACTATGTCCCCTCACCAAGATGTGACG
T
>NODE_33179_length_74_cov_8.445946
GACGCGGTCATTGTTACGTGACGTCAGTCTCCTTGTTGAACTCTCTACGAAAACGATTCC
AACCCCAACTATTTATGTTTCCAAGATCGGAAGAGCGTCGTGTA
>NODE_33228_length_31_cov_50.838711
CTGCTGAAACCTGAGCCACAAACGCTCAACTTCAGCTATACTTAACTCAGTTGAAATTGC
A
>NODE_33273_length_100_cov_24.030001
ATGAAGTGGTTGTTGGTGATCTGGTCATAACCAAGGAGGCTCACAAAACAGACCACCCAT
CTCCCACTGTAGTGACACCAGATAATATCACTGCCTACAGTTTACACGATGTGGTCCTAC
CCCTGCCAGG
>NODE_33274_length_31_cov_55.677418
TTTACACGATGTGGTCCTACCCCTGCCAGGACATGATGTCATTTACCCACAGAATGAAGT
T
>NODE_33275_length_40_cov_42.275002
CATGATGTCATTTACCCACAGAATGAAGTTCGTGACTGGTACAAGTCAACTTTAGAGTCT
GATGACCTGG
>NODE_33285_length_100_cov_241.229996
TAATGGTCTTGATGTCAGGTACTTGGAAGACCTGGTTGACGAGGTTGTAGGTGCCCGGGA
CGATGGTGTCGCACGTGCAGGGTATGTTGTTGTCGATCAGCTGTTGGGGACAGGTGGTGT
TCTCAAAATA
>NODE_33304_length_45_cov_30.822222
TGGATCTTGAGTGGGAGGGATGGGGCAGGAAACGGGTCTGGTCCCGTTGCGTGAGCGTGA
AGAAAGTCTTTTTTT
>NODE_33352_length_65_cov_6.307693
GATAAACTGGCCCCAGTCAGGAGCGGCTCCAAAAAGATGAGGAGGCACTTGAGGCAGAAG
AAATAAATTGCTGTTGGTATTTTTCGTTAAAAATT
>NODE_33353_length_31_cov_210.612900
GACGTAGACTGGCTCGTCACTGGGGTTGATGTAATCTATGACGAAGGGTGGCTCCCTGGC
C
>NODE_33382_length_150_cov_7.813334
TATAAAACACGTGACATATTTTCATGAATTAAAAACAAAACAACAATAATATAACTTTCA
ATATTCAAATTCAGCAGAACGGTTTGGAAATAAATTATGCGACTAGCGACTAGCGGAATG
TTAGACAAGTTTATCAGCAGAATTTAGTTACATATAAATTGCTTAAGTAAGATGGTTTGG
>NODE_33383_length_220_cov_3.881818
ACAGAAAAATGGGCCGAGATGACACGAGCTGTGTTAGATACAGTAGACAGTCACAGTCAG
TTAAACAAAATGTTGAAAGAACAAAGAAGCTCCCGGGGAGATGTTTGCCAATTTCCCAAA
CCATCTTATTTATATGCAACAAGATTCTGCTGATAAACTTGTCTAACATTCCGCTAGTCG
CTAGTCGCATAATTTATTTCCAAACCGTTCTGCTGAATTTGAATATTGAAAGTTATATTA
TTGTTGTTTT
>NODE_33384_length_63_cov_2.317460
CGCTCATTCATCATTTTAAACTGTTCAGCGAAGGTTTCGTAGTCCCACCTGGCGCGACGT
ACACCGCCATTGAAGCGCCAAAGGGCGAGATGG
>NODE_33385_length_68_cov_1.588235
TATACAGTCGGGGAGGGCTGGTTTAACGGTCAACTTCACCAAAGACGATATCCAATGTGC
CGATGATGGCGACAAGATCGGCAAGCATGTGACGACGG
>NODE_33403_length_40_cov_13.400000
TTTTTTTTTTTTTTTTGTACTGCATTTAATTTATTATTAATTTCCATCTCAGTGCTTGTA
TTTCACATGA
>NODE_33406_length_249_cov_24.759037
TATTACCATTACCATGTTTTGTCTGTGATGAATCTTTAAACAAATTGGTGCACAACAGAG
TGGAGGCTCGGGTTGCGGCACATGATTGTATTATTACATTACTATGACCACCTACTACAA
ATACACTTGGGTCATCGTCAGAAGCAGTCAGATTTGCATGGCTGTTGACATGCATACCCC
TTTCAAATGATTAGCCTTGATCAATATAGCGAACGATGGATGCTGGTTCGAGAGTAATGG
GTGGCAATACACAAAAACCTCTTACAATTGGTTCATTTA
>NODE_33434_length_47_cov_7.021276
TTTTTTCAACTTCTTTTGGATTTCAAATCTCTTCTTAAGGGCTGCACGTCGCAGATCGGA
AGAGCGGTTCAGCAGGA
>NODE_33509_length_91_cov_32.912086
GGCACAGCCGTAGCCCCAGCTCACAATACCTGTGAGAGTCCACCTGTTTTTCCTGTAGGT
GTACAGGGGGCCGCCGCTGTCACCCTGACAAGAGTCAATGCCACCTTCAGTCACACCAGC
G
>NODE_33511_length_299_cov_6.464883
GGCAGCCCTCCAACAGTTGCTAGACATTTGGTATTACCTAGATCCACAAAAGAAAAATCA
GAAGCTAAAGATAAAGAGGGCAAAAATGTTAAATCAGAAGATGATGATGAAAGTCAAGAT
GACGGGAAGACGCCATCATTTACAGTTCTTTTGCATGGCAGTTTGAGGGTGGAGAGCATG
GTGGCCATCACCAGAGTTTGTGATGACTGGTATNCAGTTTAAATTACAACCGGAATAAAC
TAGGTCCCGTTCTAAGATAAGGTACCTAACCTAGTAAACTGTTGGAGTGGAGAACATCTC
TTATGAGTAGTCTTCTACTTCTCTTTTTC
>NODE_33567_length_70_cov_29.700001
GAGCGCGGTGGTCCCCACCAGCGCCCCGTGTCCTTTTCCTCTCTCCATCTGCTTACGCAA
AGCCTATCACGAGAAAAAAAAAAAAAAAAAAAAAAAAAAA
>NODE_33583_length_159_cov_2.924528
TTGGCCATCAGTTTTAATTGTACAGGCTTCAACTAACCACAGCGTCCTGCACAGTAAACT
ACTAGGATATTGAAGCTCAAAATGTTTCAAACTAGAGATTTTAAGGAAAAGGCCATACAA
ATTGTATGCACACATCTCTGAATGAACTCATATGTTATTGTACACACACGATGACACGTA
CACACACGA
>NODE_33584_length_344_cov_21.162790
GAGCATAGTTTCCGGAACAGGGTAAAGACACTTACTCCGTGTCCATCAGCGGGAGTCAAC
ATCTCAACTGACAAAGTTTATCATATCAACTCGGTCTGTGACAATATTTTTGCAGCAGTG
ACCAGTTACCAGAAACTCCCAGATTGAACTTGGTAAGTATANAAAGTTTGTTCACCCGGG
GAGTCGGCTTGACGGATGATTCTCGTTTCATTAACAATGTGCACTCGTATCAAAGGCCTT
GTCCCATTTCTGTGAATGAGGCACAGGTAGTCGCCCTCAGTTGTAGAGTTGACTGTTTCA
AATAGTATAGTTGAGCCAGACACTGTTATAAAAACGTCGTCACTGGTCAATGGTCTTTGA
GGGTCTAACTTGAA
>NODE_33626_length_228_cov_53.587719
GGCCGTTGTAGATGTAGAGGTCGTCGATGGCAATATCACCGGCAGCCATGTGGGCCTGGA
ATGTGATCGTAAATTGAACTCCCGTTTGGACATTGAGGTTGTGTTTGTTCTGGACCCAAG
CCGCCTTGTTGACGTTCTGGAAGCTCTTGAAGACGGTCGTTGCCAGCGTGGGGCCCTTGT
AGATAAGATTCAAATAGGACGTTGGCCCCTTCTGGTACAGGTAGAACTGTATACAGATCG
TTCCACTGTGGAAGGTGG
>NODE_33675_length_39_cov_1.333333
CTAAAATAGTTATCACGAATGGCAGCATAGCCTTCTTGACCATAAAAAAAAAAAAAAAAA
AAAAAAAAA
>NODE_33677_length_403_cov_8.334988
TGCACATCACCACCACAATGGGAAGCTCGTCTTTTCGATAGCAATGAGGAAGAAGATTTT
ACTGTGATTGGCCGACTCAGTTATGACTCCACCTATCACCGTGAACGATTGATCGATGAA
GTTGACGATGGTACCAAAGTGGACAACTATGATTCAATTGCCCTTTTTGACTTGGGAGTA
GAATACATTTACAACTTCCGATTACGAAACTGCACACGTCAACCACTTACCCGACCATGG
CGTGACTTTGGCGTTCGACCGAACGCCACCTCATACGGTGAAGCTTACCTTGGCTCATCT
GCTGTTCCCGGTGCCGGCATGCTTGTAACAATCTGGGGTGGAAACTTCACAACACCAGAC
AAACAACTCATTCAATTCATGTCAACCTGGACATACATCGCCTGTATCCCAATTGCTCGA
ACAACATTCAGCA
>NODE_33678_length_180_cov_4.738889
AAATTGGTTGGTTATCTAGTTCCATTCTATTGAAATGTACAAAATAATTGGTCTCATTTT
TGTCATCAGCTTTTATCCAAGTTTAAAATTTGAAACATAGACTTGGTCGTTTTTTTGGTG
TTAATCTGGCACTTTGGACTGTATTTATAAATAAACTGTTAAAAGTTACCTTTATTAAGG
AAAATTACCTCCATTTCATTCATATGCATA
>NODE_33681_length_47_cov_150.106384
GAACGTGACTGGTGAATGTACCAATGAAGCAAAATGCGTAACCGTTGTGGTTGTAGTTGA
GTGTGTGAGCTCCAACT
>NODE_33715_length_122_cov_1.688525
TAAATGTGCTCCTGTGATATGATAATCATATTCTAATCATATTCTAATTCTGTCTGACTT
CTTTTAATATAGTTTATAGAATTTAAATTATTTTGCTACATTCACAGTAATAGTAGTAAT
ACTCTCTTGTAAAATCACATCCACTATTTCAA
>NODE_33716_length_65_cov_2.338462
TTTTGGTTACTTGAATTTTGAAAACTAACAAGTGGCCACAATCTTCAATCTGAATGAGAT
GTGATTATGGTAAATTTTCATTCATCAATTGAAAT
>NODE_33717_length_429_cov_6.244755
TTAAAAAACATGAAGCTATTCAGCAGCATCGGAGGAATGTTCAAGGGGCTCTTCCAAATG
TTCGGCCTCTTCAAAAAGAATGCCAAGATCATCTTCGTCGGTCTTGATGATGCAGGAAAG
ACTACACTGATGTCGGTGCTCAAATACGGAACCGTCAGTCCTTTCGATCCAACTATCCAT
CCGCACGCCCAGAACCTGGAAATCGGCAACCTGAAGGTCCAGTCAGTGGACTTGGGAGGA
CACAAAACCATGAGAAAGGTCTGGAGAGACTTCTTGATCAAGGTAGATGCAATCGTCTAC
GTGGTTGACTCGGCCAACTCCAAACGCTTCGAGGAAAGTCGCGAAGAGTTTAACAACGTG
CTGGGTGCCTTCACTGATCCAAACCAGCCCAAGCCACCAGTGCTGATCTTGGGAAACAAG
ATCGACAAGAAAGATGCCGTGTCAGAGGAGGAACTCGTC
>NODE_33718_length_40_cov_86.925003
AAACTGGGTGATGATTTCTATGCCTCAGCTGATACACTTGGCCTACACCAACGCAAGGAT
TCTGAAGACG
>NODE_33743_length_232_cov_77.659485
GCACTCCACAACAACGTCAAGCTTATTTGAACAAAGCTATTGAGGTCTATGGAAGCAATG
TCAGCCAATGGGATGATGCTGTAGTGGGAGACCTGGGACATCTGATTGGTGAATTAAGTG
AAGAAAATCTCAGGCTGCTGACCACTAGGCAGTTGGCATTGATTGCACCTAAAGTCATCC
AGACCTTACCCAGTGATAGAGTCAGTGCACTGTCTGTTGTCCAACTGACCTCACTAAGTA
CAAATCAGGCTAATGCCGTGAC
>NODE_33744_length_63_cov_121.222221
AGGACTGACAGCATTGTGTCCACCCTTGGTGTTTTCTGTAGTTTGAGTTGTGCTCTCCTT
ATTGAAGTTCACAGACACCTTGGCATCAAGGAT
>NODE_33802_length_324_cov_28.675926
AATAGTATATCTGAGAGCCAATTAAATACTTCAGAGCACCAGTTTCGTATCAGGATTCCT
TTACAGTTGTGCTAGCCAAGCCTCTGGATTAAAATGGGCGATGAAGATGTTGCTGCGTTA
GTTATTGACAATGGATCTGGAATGTGTAAGGCAGGATTCGCAGGAGACGACGCACCAAGA
GCGGTGTTTCCATCCATTGTTGGGAGACCTCGCCATCAGGGTGTGATGGTTGGGATGGGA
CAAAAGGACAGCTATGTTGGAGATGAAGCCCAGTCAAAGAGAGGCATCCTGACATTGAAA
TATCCCATTGAGCATGGCATTGTTACCAACTGGGATGACATGGAGAAAATCTGG
>NODE_33803_length_34_cov_64.235291
TTATGTCAATATAGGAATACAAAGATCTTCTGCCCTATATCAGCCACAGCTAACCGATCA
ATTT
>NODE_33805_length_63_cov_3.841270
GACCTTTCTGCCTGGATAGGTCACGAGCTCGCATTCTTCAGTGACTGGAACAAATGGGGG
ATTTTGTTCATCATCTGCTACATCACAGCTGCG
>NODE_33806_length_86_cov_1.883721
CCTGACCCTACCGTAGGCGAACACAATGGCGTTGGGTGGTGTGGCCACCGGTAACATGAA
GGCGAAGGAGCAGGCGAGGGCCGTGGGGAACATGTAGTACAACGGATGGACACCAG
>NODE_33807_length_302_cov_6.741722
GCCGTGAGCAGTCCTTTGAACGACGGCACTCGAACGAAGGTGACTAAGGTGTAGAGCTTG
TTTGTCGAGTCTTCGTCTTCGTTGCGTTGACGAGCGAGGCGAACGCGGACGCGGTATGGA
ACGTGATTGATTCCTTGNGCACCTCGCGCGAAGAACTTGCGGTGCGGCACGTTAGCGAAC
ACGTTCAACTGCCACATGAGCGCTCACTGCTGAAGCAACCACTAAACAAAGAACGACGAC
GGCGAGAGCGGGAAAAATGGAAACCACAACCGGTACCACTTTCTAGTCGGCCAGAAGCAA
GCACTATTAGAGAACCATTCAACATTATTCGT
>NODE_33819_length_31_cov_2.741935
CATCACCTTTACGGACCTCGTTCCAGAATGCGGGCAGAAAGACACGATTTACAACAGTAT
T
>NODE_33843_length_57_cov_108.526314
ATGTCGGCGTACTGCTAGTGTTCCTGGTCTATGCGGCCGTCTGCCGGGCCGACCCCCTCT
GTCACTACGCCTGTAATGTGCCACAGC
>NODE_33844_length_79_cov_2.405063
TTATAGTTGTCCAGAAAATTTCAAGAAAAAAAAACAAATGGGGTGGGATAAAAGTTAGAA
AAACGTGTACAACAATTTAAATCAATTGACACATAAAGACATATCCAAT
>NODE_33845_length_226_cov_72.203537
CGGACAAGATTCAGTTCAACACATACAGCATTGAGTCAGATGTAACAGCAGTTGTGGCCA
TCGACTACACTCGAAAGCTGCTTGGAACTCGATCAGCCAACGTTAGTGTTGTTGATGACT
TGGCTACAGGTAAATCCTACGTCACTGACGGAAGCGGCAACTGTCAACAGTACCTTCTGC
CCCTTGATAAGCTCTATCCCCAGTGTCTGCCAGCTGAAGCATCTTATGGAGGTGATCTTT
ACATTGGATTTGGTGC
>NODE_33847_length_32_cov_238.656250
TCATTTTTTAGGCTCTTCAATATTTTTCAACAGTTCTTCCTTCTTTAGGGCAATGCGCTC
CT
>NODE_33864_length_41_cov_43.487804
CAGTGGGCCAGTCAACACTTAGTGGACTTTCAACAAACCTTGACATCACAGTGGGCCAGT
CAACACATCAC
>NODE_33879_length_38_cov_3.473684
AACTGTCATTCTCTCTTCTACTTCCTTTCTTCTAACATACCTAGTGCATCTCGGTGCGGT
GCACATGG
>NODE_33880_length_116_cov_4.784483
CAGTTTTCTATAATCGTGTCTTTAATTTATTTACAATTTACATAGCCATATTTAAATGTA
TGGAATAACTCCATTAGGTACAATACATAACTTAGAAAGTGTAATGAACAGAAGATCAAA
GAGCAAAGTATTAACAACACGTAAGG
>NODE_33885_length_156_cov_3.955128
TTAATAAGTTACCTACAAATCTATAAATATAAACATTAAATACGGATGCTTTAAAAAACA
AAATGTCTTTTGATAATAATTGAGAAATATTCTACCCAACAACAGTTGATATTGTACGCG
TGTCTGCCTCGTGTAAGTAACTCGTGTCGTTCACAAACACCTTCCACACCCTCATATTCA
CGCCGT
>NODE_33912_length_177_cov_26.531073
GAAGAGGACAAACAAAAGGTTATTGATGACTAAAATCACACCCACAACCTGTTAAATTTC
CTCTTTCTCCTGGTGGTGTTGCTTATCAAAGGACATCCCCTCCTCCTGATTGGCTTTTGG
ACACTTGGCACCCTTTTGAGAAAGCTCAGTACCCTGAATATTTTGCACTTCGAGAAATCA
GAAAGAAAGAATTTATTGAAAGATGGG
>NODE_33967_length_70_cov_191.914291
GCCGTTGTGACTCCGACTGCTGCAGATATCAATGCTGTGATAGCCGGATTCAGCCTAGGT
TGTCGAAGCATTATTACTGCATGCACAGCTACAGCAAAGG
>NODE_34012_length_93_cov_35.000000
GACCAAGGCGGACAAGTCCAAGATCCCGGAGAGCGATAGGCGAGTCGTGGCTTCAGCCTA
CTTTAACATGGGCGTCGTCAGCTCCTACGCCTGGAGGGGTTACAACTGACCCGAGGCTTT
GTC
>NODE_34014_length_31_cov_19.322580
ACAATTGGCGACTAAAGCCGCACGAAAATCGGCTCCATCAACAGGTGGTATCAAAAAGCC
A
>NODE_34016_length_46_cov_44.956520
TGCTTCTTGGAGTGCACCGATAGCTGCCGATTGAAAACGTAAATCTGTCTTGAAATCCTG
GGCAATTTCACGAACA
>NODE_34094_length_75_cov_14.760000
CAATTATTATTTTTTCTTCAGCTTCTAAAAAAGTTTGTCACAAGAAACTAAAAATTTCAA
GAAATGCACCGACATTGACACTGTCTACAGGGCTACCTGTAAGAC
>NODE_34164_length_32_cov_44.937500
TCTCGGCTCAAGATCCGGACGAAAGTCTTCAGGTAGCCATTGGGCATTTGATAGAACTGA
CT
>NODE_34169_length_52_cov_86.596153
AACAGAGTGTGCGTAGTTTGCATTGCAGACTCCCATCCCTTGGTTAGAGAAGGCAAAACA
GCCACGAAAGTAAGCTTTGAAA
>NODE_34170_length_77_cov_86.012985
CTTTCAAGATGAGGTAGCCAATAGTTGATGTGATGTTGTTTAGGGTCAAGGCCGCGGGAA
TTAGGTTAGTGGGGATGGGGTAAATGACCTTGTCAATGATGTGAACA
>NODE_34178_length_49_cov_11.020409
TGGATGCTCGACAGTTTTATGCCAGCCAACAGGAGGCAAGGCCAGGCTTACAGAAGAGAT
CGGAAGAGCGGTTCAGCAG
>NODE_34182_length_121_cov_36.413223
ACACTGGCAAATAACTCTGGTAAAGAAAACTTTGTGAAACTGGTCCATGAAGTTCTTATA
AAAAATGTGATGTTGTCCCACTGTTCGTGAACCTAGTATTTAGCATTTGAGATCTCTTGA
TGATGATTACCAGATCGGAAGAGCGGTTCAG
>NODE_34227_length_77_cov_3.363636
CGCTGACCTCTCGCGGCAGCCAGTGGTACAGGAACTTGACTGTGCCCGAGCTGACCCAAC
AGATGTTTGACGCCAAGAACATGATGGCCGCCTGCGACCCCAGGCAC
>NODE_34228_length_272_cov_3.852941
CTCATCGTCCATGGTGATTCTTTAGGCATGTTGTTCTTCTTCTTCGCCCTCGCCACCTTC
TCCTTCTTCTTCAGCAGTTGCATCTTGATATTGTTGATATTCACTCACAAGATCATTCAT
GTTAGATTCAGCTTCAGTGAATTCCATTTCATCCATGCCTTCACCTGTATACCAGTGCAA
GAAAGCCCGCCTGCGGAACATGGCAGAAAACTGTTCACCCACTCGTTTGAAGGGCTCCTG
CATCGCGGTATTGTTGCCCATAAATATTGCGGACATCTTGAGTCCGCGGGGCGGGATGTC
AC
>NODE_34233_length_31_cov_93.161293
TGTACTGTGGTACAGGAATCTGTTTATACACAATGTGTTCACCACCTCTGTTCTCAGAGT
A
>NODE_34268_length_35_cov_19.057142
GAACAGAGCTTTCAAATTGTTAGGTGAGGCATCTAGAGCTTTATCACAATGTTCAATAAT
TCTCT
>NODE_34273_length_40_cov_174.824997
TGTCTGGATAAAATCCATCTTTGCGTCCTAAGCAAATGGTGGTGTCGCCGCAGGCGTTGT
GCCCTGTTCC
>NODE_34274_length_108_cov_60.333332
TTTCGAGTGTCCCTGCATATGTCCTTGGTGATTTATCAAGTCAGTGAAAGACTCAGGGTC
AAGCTGGACGGATGTAACGACTGTAGCTGTGAAGGTTACTATTTCACGTGCACCAACAAC
CCGTGCAAATTGTCCAAA
>NODE_34283_length_187_cov_92.090912
TCAACTAATTGCAGACTAAGACTGGCGAATTACTTCTTAGGAGCAGTCTTCTTCAGAGCC
TGTCTCTTCTCGTTAGTCCACTTCCTGAGGTGTCTGCCGAGGGTTCTTCTGAGGGTAACG
ACCTTGAATCTGTCGAAGTCAGACAGGTTGTCTCTCTTGGTCTGGTTGGCGACTCTCTGG
GCTCTGGCGGTGCTTGCCCACTTCTCGTTGAGCTTGT
>NODE_34300_length_46_cov_235.978256
TCGTCTGCAAGTTGGACTGTCTTAGCGTGTCTGCCGACGGTAAATCTGGCACGGACTGTG
TCAATCATTTCTACGA
>NODE_34348_length_56_cov_157.321426
GTCCACAGCTGTTCCACGGCACAGAAGTACAAGGAAGGCGAGACCTGGAGATGTCACACT
GCATGAGATCGGAAGAGCGGTTCAGC
>NODE_34351_length_92_cov_3.076087
CCCCTAATTTACAGCAATACAATTAACATTAAGTCTTTGTTTCAGAAAGCTAAATCTGCA
CTGAGCATAACATATTCAAATGGCCAATACTTTATTATCGAACAGAATTGTTCATTTTTA
TC
>NODE_34352_length_71_cov_1.591549
TGTCAATGCATTGTAATGTGTATTGTGCATTTTAGTGAAAAAAATCTTATAGCCATGAAT
GGATTTAATTTCTAACAAAGAAACATGGCCTTTAGCATTAT
>NODE_34361_length_309_cov_53.699028
CAACACGATAAATATGCATGATAAGCCGCTTGTGACATAAATAAACTTGAAGTTCAACCA
TGGGACTTCCTCTCGTGTTGTCCTCGGTAGGATGACTTGCAGGAAAGATGAGAAGACGGC
GGGGATCCCAGCCAGAACACCCAACATTGCCAACAGCTCGCAGAAGATAACGAAACCTGG
CTTTGATGGGTAATATATGCATCTGCCCCGAGAACAGATCTCCCACAGCGTCATGTAAAC
GTTTAGGTAGATCCCACCCCAGTTTGGAGTGACCACGCCCACAATGTGACAGGACACGCC
CAATCCAATAAACAGTGGTCCAGTCAGGCAAAGTTTTTT
>NODE_34362_length_38_cov_102.684212
TGAAGAAGACAAACAGTGTTAAATTCCAATGTTTCGATTTGTCCTTTTCTTTGGTCTTTG
CCTCAAAT
>NODE_34375_length_847_cov_22.893744
TGCTGCTAGATAACAAGATGAAACAAATGATCACACTTCATCTATGCTTGGCCATGGCAA
CCGTCTGTCTCGCCGAGATTTTTTGCACCAAAGGCCAGTACTTGTTTACTGATCCTGATG
GGGATTCCCGATGTGTTCCTTGTCGCACCGGTACATTCAATCCAAACGAACACCACAAGG
ACATTGACTGCGCCACGTGCACGGCTGCGGAGACCTACCAGCATGAGATTGTCATCTCGG
AGTGCAACGGTGTGCGGGACACCGTGATTGGCTGCAGGGAGGGGCACTTCCGCGTGCAAG
TGTACGATGGGATGTACTCAGACGGTGAGTGTTACAGGTGCGCACGGTGCGCTGCCGGTA
TGAGAACTGTCAGGCATTGCAGTGGAACACGTGACACGGTCTGCGCGCCTTCAGTCATTG
TAACGTAAAAAGGTTTTTTTCGCACGGGATGCCGCGTAATGTTTATATTATTTTTATTTG
CTGCATTCTACAATAAATATTACTTGGTCTTGCTTATAAACAAATGGACGCTTGTAACTC
AACACACAAACTCAACTATTGAAACCAGAAAAATGACAAATGCCTAACCATGTACAAACA
TCCAAATGAGGCAATGGCAGGGCACCTTATCATATGTCAATGCACTTCGCCGCAGGGCTT
AAGCTTTTATATCCACCAAAATGTACCTATGCCGCCGAAACTAACCACCACAATTACAAG
ATTGCGCAACAACAGCCAGTACACAAGGAAAAGTTGTAGAGAGTGTAGATGNCCGGCCGC
ACAAGGTTGTAGTTATTACCTAACCCGAATACTACTGTTAAAAAATAAAATTTTGACCTT
ACATAAGATTTATTATTTATATCAAAAACTTATTAGG
>NODE_34390_length_145_cov_3.903448
GCAAAAGAGAGACATCGACAGCCATCATGAAGCTGTAAAGAGCAGTCAAGTGGGAAGCAA
ACAGGCAGATTTGTGATACAAATTTTTTTGAACAAACAGAGCATCATGGAAAGCCAAAGT
AAACAAGAAGTGAACATTTGTTCAATTGACTATATCACTATTTCTAGATGGTCTT
>NODE_34391_length_34_cov_311.264709
ATCGCCTGCTTGCGACCGTGTAACGCAGACATGCTCCTCAGACAACTTGGGTTCGGATCC
TGTG
>NODE_34404_length_36_cov_53.611111
TCTTGTGACGTGTCTGGTTTTGATTCTGAAGCCGGGGCTACGTGTCGAATCAAAATAGGC
TCCTGG
>NODE_34437_length_170_cov_22.976471
TTTGCAGTCTGTCTTGTCATCATCTGGTATCTCAAAGCAACTGCTTTCATTAACCAACAC
GACAAGGCAAACTAAAGCAAGAGCCAAACTAACCAGACTTAATGCACAAGACACCATATT
TAAATGTTAATAAGGTTGGATATTGCTACTTATTGTCGCAGGACACGATCGAAGTTAGCA
GTTGGGAAGCTGTGTATTAC
>NODE_34439_length_33_cov_15.909091
CGTACAGCATCGCCTCGTTTCCATCAAAGATATCAAAGTGAGGCTTGCAGCACGAGTTCA
TCA
>NODE_34442_length_57_cov_19.350878
CATCATTCGTATCATGCCCAGTTTTCGACCTGTCTTATCTCTGACGTAGATAGGATACTT
GCAGCACGAGTTCATCATTCGTATCAT
>NODE_34449_length_126_cov_5.904762
GCAATAATCTTCTGTATAGAAGGAGCGTCTATATTAGTTAGTTATTCCTCTTGAACCGAA
GACGGCACATAGGGCAGAAGTCATGGATTTCCATTTACGACGATCCGTCGCCAATTGTAT
TAGGTCTTGATTATTTCTTAGACCCATGGTTGAGCT
>NODE_34450_length_125_cov_2.640000
CCCAGCATAGGGACTTATCTGTCAGCAATGACTTGTATGAAATCTTCATGTTGCGATAAG
AATATGTGTCACATTTTATAAGGAGAATACGATGGAATTATATCGGGCATGTTCTTCGAA
TGGATGGCCTTCATATGGACACCAAAAGGCAAAAG
>NODE_34455_length_160_cov_11.568750
CTGTTATCCCTATTTTATTTTTTTTTTTTCGCAATGACATACTTTATTTCGATTAAGTTT
TAAAACAAGCGAATTGTGTAATGTTATCATCGTTTCAATATATGTAGCACTTTATTAAAT
TATTTCGTCCAAAATTAATTTGTGCCCAGCCGAAAAGCCGATGAATATTTTAATTTAGTT
TATTGATTTC
>NODE_34468_length_228_cov_4.267544
GGGTAATCTCTCTCAAGACACCAATGCCTCACATGATAAAGGGGAAGCTGTCCCGTAGCA
CCGACCTCATGTAATCACAATAAAAAATGTTTTCGCTGGGACTCGAACTCTGGACATTCC
GCGTGTTAGGCGGATATGATAACCACTACACTACGATGCAGATGTCATTTTGTGAAGTTA
CAAGGCAAGTGAACGCAAGATGGGTAACCAGACAAAACAAGTATGCACGTCTAAAAGATC
GGAAGAGCGTCGTGTAGG
>NODE_34469_length_161_cov_90.447205
CCTCGTTTCCTTGAGCAATGTCAAGGCAGTTGGTAACCTTCACCTTCACTAAAGCCTTGT
TGAAGCGACAGGTATCATCCTGGGCGGTGTAGGCGTAGTCAGATTCCAACTCCAATCCAC
CGGTTTGGTTGATGTATTGAAAAGCTGAATCCATGTATCCACCATTGCATCCAGCACAGC
CATCTCCATGG
>NODE_34537_length_44_cov_28.363636
CCTGCCCTCATACCTGCACATATGATTGCCCCAATCAGAACCAAACACAAAACACGATTC
ATCTTCTGGGAAGT
>NODE_34539_length_40_cov_16.150000
AAACACGATTCATCTTCTGGGAAGTTTTCGGAATCTTTAACCTAAAGATCTTTGCCGAGA
TACAGAGCTT
>NODE_34540_length_173_cov_33.023121
TACAGCTGATCAGGGCAGCTAAGAGAAGTGTGATTGCATTTATTAAAAACTTGGGTTTGA
TTCGTTGTGCTTTTGATAAATTGGAGAGAAAGTTTATTTACTTTATGTTGCTTTCTTTTC
TTGCACAAAAAAAAGAGGCTGTGCCTTTGATTTAGTTTGGCTGAAAATTTTCTGCATGGT
AGCCATGCCTTCAGCTACGGAAG
>NODE_34543_length_41_cov_312.731720
ATCATGACTGTGAAGCGAAGAAATAACGGACGCAACAAGAAGGGCCGCGGCCATGTCAAA
TACGTCAGATG
>NODE_34544_length_45_cov_316.955566
GGGCCGCGGCCATGTCAAATACGTCAGATGCACCAACTGTGCGAGATGTGTCCCTAAGGA
TAAGGCCATCAAAAA
>NODE_34568_length_74_cov_52.459461
TGGCTGTGTTTTTAAATCCCTTGTATTAACTTCACCGTCTTGTCGTTCTCTCTGTCATCG
TGTCGTGGTCCCGTCCGTTAACCAAAGTCCGTCTGACATTTTCC
>NODE_34575_length_68_cov_58.191177
CGGTTTCTGCTTCAGCTTCGTATTCACGCCTAAGTTACCTCATAAAGACGCCAAAGCCAC
CTGCGAAAAACTTGGCGGCACGCTGGTCCTGGTAAAAA
>NODE_34576_length_360_cov_6.830555
GGGTAATATGTGAAATTGGAATTTACCCCATTGTTGCTGGAACCCCTGCTGTTGCAACTC
TCGAGCAATACACCCCAGCCGTTTTCCAATTCAACCAAACCTCTGCATCTTCTGCTGTTT
ACTGCAACATCTCCAATGCACAAGGATCTTCTTNCGACAAATGACGTTGTAGAGGTTACG
TGTTCCTAGAAGAAAGATGAGGAAGAGGTGATAACAAATGTCTCGTTTGGAGTGGTGGGT
TGTTGGGTACCCTCAGTAACGGAGGGTTTTGCCACCAAGAAGACCTCTTCGGAGAAAGAT
GTACGGGAAGCAGGGAGTTCCTTTGATGCAGTAGCAACGTTGGGGTTGACCTCCAAGAAG
GTCGAGAATGTGACACTGACGTTGGACGTG
>NODE_34608_length_44_cov_61.113636
GTCGGCAACAAGTCGTCATTCAGCCGTTGTGTCATTCAGCCGTTTTGTTATCCCTATTTT
TTTTTTTTTTTTTT
>NODE_34658_length_82_cov_204.756104
TGTTGGGAAGATCTTCGATTTTATGTTGCAAGTGATGTTGGCTTCTACAGAAAGGACATC
CGAAGATGTAAGAATCGGGATAAGACTTGGTCAAAACGCAAACTTTGGCCAT
>NODE_34659_length_146_cov_2.678082
AAATCCTAGTCATCGAGCATGTGGCGTGGAGTGGACATCAGTGGTCAAACTTGAAATGTT
TTATGGTGTGGTGTCAAAAACTTTGTTGCAGCCTCTTCGACACCGTGCCAAAGTCGAACT
ATCAGCACCTTAATTGTTGGTCATTACTTGCCCTTGTAGACGTCCAGGTGCCATTT
>NODE_34660_length_106_cov_4.066038
ACCACTCACCTGGGCCAGACGTCATCAAGAACAGCTTCATTCTAGACTGGACGGCAAGGA
CCCAGCAAAGGTGAATCAGCCAGTGTTTCCATACTGCTGCAGGGGCCATGATTACGTGTG
TAGTTCTGTCTACTGT
>NODE_34661_length_143_cov_2.300699
TTTTTTTCCAAGGTATCAGAAGATAATTTATTGATGACAAGTTCATTAATATGGAAGAGT
GGGCTAAACTTAACCATGGACGCTTCCCTTCTCGCGAACGTGGATCTCGTTGGCGTGTTG
GCAATTGGAGCAGGGGCCACAGAAGCACAATGTGCAGCAGTCGGTGCAGTAAA
>NODE_34680_length_92_cov_56.956520
TGGTGCAGGTCCCTCCCAGATCTCCTTGTCAAAAATTGGAGAGACAGAAGCGATTCCAAT
CACCTTGACCGGAGTAACCGTGTCATTTCCGCTGCAGTAGCTCGTACAGTTTCAACGGCC
AT
>NODE_34695_length_67_cov_2.149254
ATAATAGAAACTTCTGTTGTGACATCTGCGGTGACAGGGAGGACAATAACTTGGATATGT
TGTTGACGTCATAGCGAGAGCCAGAGCCACACGCGGA
>NODE_34740_length_60_cov_82.099998
TCCAGGGAATCGTTGACCCTGAGCTGTTCATCCCTCCCCAGGAATGTCTGCAAGCTCCCA
AAACCGAGTCAAGCAGCCTGGTTCAAAAAC
>NODE_34751_length_44_cov_63.136364
CTGACCTTCGACGCTGCGCTCAAAGCGTGCGTTTTTGACAACCACGGCAGCTTATGCATC
ACTACTGCCTGACA
>NODE_34752_length_173_cov_6.705202
CGATGCGCCGCTACCCTCCACTTTGACGCGTCCATTGTAGTAGCCCTCGACCACCGCGCC
GTCAAATGGCGTGACGCTTGCCACGGTTTCCTTACTGCCATATAGCTCCTTGCTGATAAT
GATAGAAGTCACGTGAAAGACGTCGGCGCGGTCGGAAAGACTATACGGTTGGAGATTTGG
AGTTGCAGATGTAGTTTCAGGCC
>NODE_34810_length_36_cov_36.333332
TTTTAAAACAAAATCTGCATTTGTGTTTATGTATGACCCTTCTCATCAGCTCATGAGTAC
ATCAAT
>NODE_34855_length_31_cov_22.032259
CAGGGCTTGTGGCACGCCATTGATGCTCTTTGACTTGAGAACACCATCCTCTTCAATCAT
C
>NODE_34856_length_151_cov_11.198675
GACTTGAGAACACCATCCTCTTCAATCATCACAGTCTCCTTTCCATTCTCCACAACCTTT
TTGGTGACAATGCGTTTCCCATTGACTATTTTGGTNACTCGACCTCTTACCTAGAACACT
CCTCTTCTTCCTCCTGCGTTTTGACAAGGGCACTCCCTTGGGACCTTTTCTACTAAGCTT
A
>NODE_34877_length_552_cov_9.304348
GAAAAAAATAATTCCATTAAAATATTCACATAAACTCTCTTTAAATTGTTACTTAATTAA
TCTTTGACATATTCAACAACCTCCACCTTAAATTAAACAAATTTTGAAGAAATTCAGATT
TCTGAAAAATATAAAAACATTTTGAGCTCTGTTGAAATGTATTGCAATAAGAATGGCAGA
CAAGAGACAACTAGTTATCATCTGTTCATGTTCCCTCTTTATTTTGATCAGGCAGTCTCA
GATAGTTTCAAGAAAAATTCATTCAAAGTGAACATTATTTTATTAGTCATATTCCTGGAG
ATGCTATCAAACTGATGCTCGATCTACAATAAGTTTTTTCAAGAATGGAATTGAGTGCAC
AGTGTGTAGGCCTAAACTTCGCAGCAGTACCAAAGGTGGGAAATCAGTGGAGTAGAGCCG
CTGAAGACCGTCTATTGTTAGCATCACTGGGACATTGTGTCTCTGTCTCTCAGTTTCATA
GTCCAAAAGATGGGTCAGAGAACCCAGATCTGCTCCATTTTGCACAGCTTTTGTTAATAT
TTCATTGAGACATTCAACATCACCGAAACCAAGATTGACCCC
>NODE_34881_length_126_cov_3.539683
TCAAAATAAAGTGTACATCACCGGGGCTGGTTGGGTCTAAGTCTATTTCGACCATTAAAC
AATTTACATTTTTATTGTTTAATATTTTTACACCGTCTCTTAGCTGTATAGTCTGTCTGT
CCAAAGGTATGGGTCTCCATCAAACTGTCTGTCAAT
>NODE_34882_length_327_cov_13.345566
GGTGCTCCAATACCTGAGATACTGCAAACATGCACACAATCATGGTTCACTCAAGCATGT
GTGTGGTAACATGGTGACAGCTGAAATAACATCTTTTACCTTTTCTGACATGACGCAAAA
TTAAATTCATACAACACATTCCCCCAACCCTTTGAAAACAAGATCGGAAGAGCGTCGTGT
NGGAAACTTTTGTCCTTATTTAACTACCTACAAATCCGGAAAAAAGATGGATTTAAAGAT
TGGTATTACTATTACGATTTTTATAAACGAATTTATCATCTTTTATGTTACAATCCATAA
TGATGTCAAGACGTAGGGTGGACTTGTGTGTTTATAGACTGGACTGCCCGAACGGTC
>NODE_34887_length_198_cov_2.449495
CAAAGTTGACGTACCCGCATTGCATTTTATAATATGGATTGCACAGCCAGTAAACTTGTC
ACAAGCTCAACATTGTCCTCCAAGGACCTTCCAAATCCAAGAAACAGTGAACACCTCCAA
TCTGAGGAAATAGCTAGAGGTAAATGGATTGCAATGAATATGATCACCTACAAAGATCCA
ACTGGGAAAGTTAGATCTTGGGAAGGAGTTACTAGAACTACAAAGTTA
>NODE_34888_length_31_cov_90.258064
GTCCACAAGTTCCTTGTCACTCTCACGTTTGACAGCAGGAATTTGCTCTTCCTCTCTCAT
C
>NODE_34890_length_100_cov_33.689999
AGCCTGTTCCTACTGACCTCCTTGCTGACCGTTGTCCAGTGTCACGCCGATGATGACAAT
GGCGGCCAAGACAACGAGTTGCCACCGGGCTTAGGTCGACTTATATTTAAGCAAATGAGA
TTTCGTGAGC
>NODE_34958_length_76_cov_7.302631
TTGTACCATTCAACTGAGTAACATGTAACCTGTAGCCTGCAACCAATAACCTGTAGCCTG
TAATTTGTTGCCTGTAACCTGTAATTTGTAGAATGTAACATGTAAC
>NODE_35002_length_323_cov_48.349846
GAGCGGCCAGTCCATCTAGTATCATGTTGATCTCAAGGTCATGAACGGTCACGTTGAAGG
TCAGCTGCTCCACCAGTTGCTTGAGGCCGATGACCTCATAGTACGTGTACATGGACAGGT
TGTACCTGAGGTCCATGACCTCCGACCTCAGCTCCCGATTCTCCCGCTGCAGGTCAGCGA
TGGTGTTGTCGTGGACGATGATGTACTTGACCAGGTCGGAGATGTCCGGCTCGGTTGCGT
CCACCCTGATGGACGTGCTCAGGTAAACAGAGTGCTTCTCCTGGTTGAGCGCGAACAGCT
CGCACGAGTACAGTCCAGCCTGGTCCGCGAGATCGGAAGAGCGTCGTGTAGGG
>NODE_35003_length_160_cov_21.325001
CGGCGCGGTGGTCGAAGGCTACTACAATGGACGCGTCAAAGTGGAGGGCAGCGGCGCATC
GTCCACAGTCTCCGGAGAACAAGCTTTCCTCCAGCTGACCTGGGACAGCCCCGTCGCGGA
CCAGGCTGGACTGTACTCGTGCGAGCTGTTCGCGCTCAACCAGGAGAAGCACTCTGTTTA
CCTGAGCACG
>NODE_35005_length_66_cov_1.666667
TTTGGCTTCTAATTTCAATCGTTTTTTCGTGCCTATTTTCCCACCATAATCGATTGGATC
TTGAGCCACATCATCTGCGAATTCAGGATCATCGGC
>NODE_35016_length_79_cov_120.797470
ACAATCATGTTCAAGACGTGATCAAGAATGCAATTCTGACTCTGCATGCTGTTCTCGCAT
ATGCAGTTGTCCTGCCTCTATGTTCTTTAGATCGGAAGAGCGGTTCAGC
>NODE_35017_length_47_cov_47.382980
AGAAATGAACAGAGAGAAAATAGCTATAATAGTGACTTGATGGGCAGCTTTCAATATAAA
ACAAGTGTTGTTAGTTT
>NODE_35024_length_110_cov_2.790909
CATTGTCAAGCCCGATATTAAAGGATGAAAGAGGATAAACAAGCACTGAAAAACTGAAAA
TAAGCACTTGTGTAAGGATGTCATCAGATTAATTTTGCATTAAAAAAAAGCAGACGTTAC
TTTAAGTAGAGCCGAAGATA
>NODE_35042_length_73_cov_16.835617
GGCCACCGACGGCGCACCGGTCGAAGGTGGTGGGATGGTAGCTGTTGTTGATAACGTAGA
GGCCCCTGGTGTCAACGTGGTCGGACTGGTTCTAACTGGCACT
>NODE_35048_length_41_cov_47.512196
GGACATCAATGAAAGAGGATGTGTCATGAGGATTTGTAAAACGGATCTCAAAATGGTGTG
TTCTGCCACAT
>NODE_35058_length_54_cov_2.092592
TGAACAAGTGCCATTCAGACAGACATGAACACGTGCCATTCAGACAGATGTGATCAAGTG
CCATTCAGACAGACATAAACACGT
>NODE_35072_length_32_cov_80.500000
TACACAATTCACACGAGTTGCTGCCCTCAACCACAACACGTCATCGCCGAGCTCTCTAGA
AA
>NODE_35073_length_71_cov_53.873238
ACAACACGTCATCGCCGAGCTCTCTAGAAACTCGTTTTGTCCTCGTTAACTTCCACCCCG
ACCGCGCTGCTGTGGATACTCGTGTCTTCTGCGGACATGTC
>NODE_35074_length_80_cov_27.875000
AAAATAGGGATAACAGGGTAATAAGAGTGCTACGAGCTATCACCTAGTCTGCATGTTATC
TTGCTCTGTAGTCAATAGCTATTAACTTCTGTCACATCACTGAAGAGTTT
>NODE_35086_length_77_cov_2.922078
GATCTATACTATGGGCACTATGGCTAAGCGTAAGCAATTTCACAATTTCTATCTGTTTCA
ATCACAGTGCACTTTATGTTTACAATGCCATCTTTAACGAGAATTAT
>NODE_35087_length_45_cov_18.133333
GATGTTGAAATCTTTAACCTGTTTGCTTTCCTCCCTGTCATATTTGATCTTGTTGACCCA
GTGCTCACAGTTCTT
>NODE_35119_length_48_cov_47.541668
TCACAATGAGTAGTTTTTAATCCGGAATAATGACGTCACTTGCATCAAATATATGTATTA
CTACTGGTCATTGTCAGA
>NODE_35134_length_41_cov_237.536591
TTCTACTTGTTACTATCAACTTTTCTGACTTCTTGTGTCACGCCTATAGTTTCTCAAGAT
TTTTGCAACGG
>NODE_35141_length_89_cov_2.000000
TGAAGCTCTTTACGAGCTTGTTGTCTGGATTGGTGTTGCTTTACTAAATTCGAAAGCATT
ATTTAAAGTTTTTAGGAAATACAACTACATAAAATGCAGATCGGAAGAGCGTCGTGTAG
>NODE_35142_length_32_cov_135.343750
CTGCTTGTAGTGGTATCGTTCAATGGTCACACCACTGCTGGGTTGCAGCAATGTTCCGGG
CT
>NODE_35144_length_476_cov_6.548319
TTTCATTCAAAAAAATGTTTATTCTTTTATATAAACCATAACATGTACATATTAGAAACA
ATTTACACTTATACACTATAAGTATTAGCTCAAGAATAATGAAACGCGTCATGTATTGCT
AATGATATGCTGGTTGATTGACTTAGCACTGGGTCACTCTATAGGTCACCACTTTGGGCC
ACCTCTATTGGCCTCCACTAAAGGTCATCTCTATGGATACAAGTACTCTGGCCTGGCTGG
ACTGCCGATCCAATCACAGTCGACATGGACGTACACTGGCCTGGACCTGGAGACTGACCT
CAACTGACCATCCAAAAGATTTCCACTATTATGTCTTGACACCTGNCACTTGAGACGTGT
GTACTACCGCAGGAGCAGAGATGAGTGCATGAGGAAACGGGATTTCTGTTTGTGTGGTGG
CAGGGCAAACAGTGTGTACTTAGATTACGAGAGGGGTAAGTAGTCTACGTCACACCGCAA
TGCGACGGTCTAGAGGTTCCTAGATC
>NODE_35145_length_31_cov_12.548388
AAGATTTCCACTATTATGTCTTGACACCTGGAAGCTGTAGAAGGGGTCATCCTGCAGGGG
A
>NODE_35146_length_333_cov_72.840843
CACACCAAAACACATTGGAGTTCTATCCAGTATCACTGACAAGCTTGTGGGTTGGATCTG
TCTTCTTTCATCCAGTTCCAGCATCTGCCGTATACTTTGTTTACCTGATTGGAAGGCAAA
AGTATTTCAATGGCTATGTGGAAAATATAGAAAACAGGATTCCTGGATTCAGGCTGAGTA
TCCGATGTTGGATTGGGTTGACTATAATGTGCATCCTGGGAACTGGGCACAAACTTGTAC
GCTACTATGGTGGCATTGACCTCTTTCAGCTGCTGCAGGACAACCTGCCAAAACTTCAGT
AACTCAAGAAATTTACAGATCAACAAAATGATCCAATTAAAATGCAAGATTTATTTAAAC
AAA
>NODE_35147_length_39_cov_83.153847
ACTGAAGTTTTGGCAGGTTGTCCTGCAGCAGCTGAAAGAGGTCAATGCCACCATAGTAGC
GTACAAGTT
>NODE_35193_length_31_cov_46.000000
AAAAAGCCTGTGGAGGAAAAGCCCATTGATGTTGAGGATAACCTGAACGAAGACGGCTCA
A
>NODE_35194_length_31_cov_33.322582
GTATCAGCTTCCCCTTCTACCTCCTCCCCGCAAGCAAATCGCTTAAACTGCAAAATTTCC
A
>NODE_35195_length_43_cov_12.372093
TGTACTTTATCGCCATCATCAACCTTAGCTAGATGTAACGAAATGATTCCTCCTCCCCGC
TCATCGTCTGCCT
>NODE_35207_length_54_cov_47.629631
GTCCAGCAGAAGCTGACGGACCCTTGTCTCGAAGACGATATCTTCGATTACATAAAGAAC
CAGATGTTGAGTTACTCCCCCCTG
>NODE_35228_length_31_cov_22.096775
AATTTCGTCATTTTTATACGGCACCCGTTCCACTACGCTGTAATATGCTGCTTCCTCAGC
C
>NODE_35286_length_759_cov_8.712780
GGGTAATACATCCTGTTTCATCTACTTCCTAGTTTCAGGTTGATAGTCTAACTCCATAAG
TCTCAAAGAGATTCGTGTAGACTGACCAGAGTCCGCGAATTTCGGTGAAAGATGTCTGAG
ATTCATGATTTTGGAGTCGCTCCTGTGACATGTCACTCATTTGACAAGGACAGATCAGGT
CTAGCACTCTCTCTCAATGATTCCAATGTTAAGATTTACAAAAAGTCTGGGACCAAATGG
CAAGAGACAGATACTTTAAGTGAGCATGGACAGAGAGTCACAAGCATTGACTGGGCCCCC
AACAGTAACAGGATAGTTACATGTTCTGCTGATCGCAATGCATTTGTCTGGATGCTAGAA
AATGGCAAGTGGAAGCAGGTCCTTGTTATTCCTCGGATTAATCGAGCTGCAACGTTTGTC
AGATGGTCACCCAAAGAAAACAAATTTGCAGTAGGTAGTGGTTCTCGTCTGATTGCTATC
TGTTACTATGATATAGAGAACAATTGGTGGGTCAGTCGACACATAAAGAAGCCGATTCGT
TCAACTGTAACATGCTTGGACTGGCATCCAAACAACGTGTTGCTAGCTGCTGGGTCTACT
GACTTCAAGTGCAGGGTATTTTCTGCGTACCAGAAAGAGGTTGATGAAAAGCCTGGTCCT
TGCTCATGGGGTACCAAAATGCCTTTTGGAGCCCTGATGGCTGAATTCAGCAATGGTCTT
GGAGGCTGGGTGCACTCTGTATCTTTCTCTCCTAGTGGCGACAAAGTGGCCTGGGTGGGG
CATGACTCC
>NODE_35287_length_80_cov_129.162506
GAACACGCCTTCTGTGCCTGATGCAGATTCCCACGATGGCGGCGATGACAATGAATGCTG
CAGCTGTGCAAGTCCCTGCTATGAATGGTGTGTCTGAGTAGAAAGGCGTG
>NODE_35299_length_267_cov_15.438202
CTACGGGTTACGGTAGTTTTCTACTACAGGTTTTCCGGAAGTCGACGAGACGGTAATAGA
AGTTGAGTATGTAAAACATAAAAAATTTTTGGGAATGTTTTAATTTAACTACTGTTTTTT
NCCAGCTCCCCAGTTATGTCCTCCAATATGGCCACTCTGCCCAATAATGCAGCCACTGCT
CAGAGCTAAACTATTGCAATTAACTGATGCCCAATGCCATCAAAAGATGATGTCCAAAAG
GCCTTCAGCTGCTCTGCCATTATCTTCAACTCATACATTTTGTATTTTTTAAAAACC
>NODE_35300_length_487_cov_10.930184
CAGGCAGCTCTTGGAGGTGGGAGGAGCAGAGGACCTGCCCAGTGTACCCACGGCAGAGCC
TTCGGAAGCACGCAAGGCAGCCCCTGCTAAAGCTCACCACAGTGAAGATGATGATGATAT
GAGGGAACTTGAGATGTGGGCATCGTAGAGTTGGATTCTCTCTGTCCAGGCATACGGCAA
CTGAAGTAAAGCAGATGGATAAATGAGAAACTCTTAGGTTTAATAACAATAGCAATCAAA
CTAGTTCCAGCCAAGTTTTTCTAACAGGTCAAGCCGACTCTTTCCCGGGCTATTTTATTG
TGTCTTATACTACTTATCAGTGATTGGAGATTTCAGACTTTTCAAGTAATAGCTCTTCTC
AAGATCAGCACACGCGTTGGATATTCTCACTAACGTTTGGGATTTGTCGCCAACTGAGGG
AAAGTTGTCTGAAATGCTAGAAGTGAGATTCTACTTTTACTGGTTTCAAACTTAATTGAA
TGTTTTCTGAGTGAGATCGGAAGAGCGGTTCAGCAGG
>NODE_35301_length_366_cov_11.180327
AATCATCTAAATGTCATCAAGTCAATGATGGTAAGTCAAGAGACCTGGTGGCTCATCAGA
AAAAAACAAACATAAATTTACAGAAAGCTGTTAATCTTATTATTTAATGATCAAATACCT
ATTCATTTCATTTGCTTGACTTGGTCGGGCACTCAGAAAACATTCAATTAAGTTTGAAAC
CAGTAAAAGTAGAATCTCACTTCTAGCATTTCAGACAACTTTCCCTCAGTTGGCGACAAA
TCCCAAACGTTAGTGAGAATATCCAACGCGTGTGCTGATCTTGAGAAGAGCTATTACTTG
AAAAGTCTGAAATCTCCAATCACTGATAAGTAGTATAAGACACAATAAAATAGCCCGGGA
AAGAGTCGGCTTGACCTGTTAGAAAAACTTGGCTGG
>NODE_35302_length_31_cov_1.258065
CGGCTTGACCTGTTAGAAAAACTTGGCTGGGACTAGTTTGATTGCTATTGTTATTAAACC
T
>NODE_35306_length_121_cov_51.487602
CGGTTCCCCATCGGCCCAACCGGTGCTCGCTTTGGTTGCGTCATCTTCAGTTCAACAGCT
CAGGTCATGTTTGATCTGTCTGACGACTTGGACAGGGCGTCTCTTGAAGAGGCCTTGGAT
TTACTGCCTTATCTGAACACAACCACACACA
>NODE_35307_length_285_cov_34.098244
GGATGTGCTGCGAGAAGGCTAGACAAAGATAGCCTTAGACGATGCCGGGACTCAAGCCGG
TCACTCATGACTGGTTACGGTTGTCTTTATTATCTGTGAGGGACTAGGAAATAGGCGACC
CGCCGGAGACGCCAAAAACAACACAACGAACTTTTCGGTAGTCAGTTTTTATGCTATTAA
AACCGGCGTAACAAAGAAGGCGGTAATAGCCGACTTTTTTACAGGTGAAGCTTCTGGTCT
AGTNCTCCCTGATCCTTTATCCGCTGGGCGGCCTCTGCGGTTTTTGTTGTGTTGCTTGAA
AAGCCATCAGTCAAA
>NODE_35328_length_56_cov_52.642857
TTACTTAAATAAAAGCGTGTAATAAGCAGACGACAATGAAACAATATCTGCAGCAGAATT
TGACTCAGGTGCTTGGGGGGCGTTTC
>NODE_35335_length_72_cov_103.722221
GTGGCCTGTGATTACAACGCTGCCTTCCAGACCGCAATCGCTGCTCTTAAGTCACTGCAT
CTCAGGGGACTGCACCCCGAGCAGAAGAATAATGCAGTTTGT
>NODE_35341_length_336_cov_4.160714
TTGGAGCTGATGAAGAAGCCGAACACGAGCACTGGCACCATCGTGATCAAGAGTCTGATG
AAAGAGATGTCAGTGAAGCACAAGAACAGGAAGAAGACGATCAGGCACGAGCCCAGGATG
AAGATGATCGCCGAGATTGTGTACATGTATCCGGTGGTGCCCCAAGCGTGCAGGAAGAAG
CCGATGGCGATCGCGTTGAACAGGCACAACCAGTAGANAGGGTCCGCGAGTTCTTAGGGG
TTCACATACGCTTCGTGTCACACTTCTACTGCATCTCTTGCTTCAAGTCGCCACTACGAG
ACTGAACTCCTTCCTTACACGTTTCATCCTACTACTACTGCGTCTACTACCGGCAGTGGT
CTCGAT
>NODE_35342_length_83_cov_5.084337
CTCCCTCTTCCGCAAGTTGACAACAAGATCAGTCTTTGTGGGTACAAATGTTCTTGCATG
ATGTGCATGTCCCCTGAGTTTCAGGTTCTTGGATGGCTTGTATTTTTTTTGTT
>NODE_35343_length_71_cov_1.971831
TTCCTTGTAGCCAGCCAAACATGTTAGGAGGATGATCATCTGAGACTTTAATTCCATGTC
TACAAAATCAACCCTCCAATAGAAATGGTACAGTGGCATAG
>NODE_35440_length_271_cov_49.309963
AACTTTCAATGTCCTGATGAGGGAGTTGTGACAGGCGTAGCTGCATACCATGGGGGTAAC
GTTGACCGATGGTTCCAGTTTCGATGTTGTTTCCCTGAAGGGTACATCGCTCACGCCTGT
GTCTTCACACCTGACCTCAACAGCCTTGGGGGGTTCATGAACTATCGCGTACAAGAGAGA
TGGTACATCCGGGGCTTCAGCAGTCAGTTCTATCAAATGCCCAATGGCTACTATGACCGT
GTGTTCAGTCTCAACGTTTGCAAAGTGAACAAGCTCTCACCGACTTGAATTGTCCAGATC
G
>NODE_35441_length_101_cov_9.623762
GATTTTTATACAGGGCCTAGCACTAATAATTTGGGAGACTGCATCCTCGCGGTTTTAAAA
TAACATGAAATGCTTTGTGTCCAGCCTTCATGGCATTCTTTGAAGTTTCAAGATCGGAAG
AGCGGTTCAGC
>NODE_35442_length_298_cov_5.308725
CTGATCAGCTTCTCCTTAGGTCGCACGGGCATAAGATATTGGCCGTCTGCCTTGAATAAC
TTGGTCAGACTTCAGACTTTGGACCTGTCCAACAATATTGTGACGTTTCTGAGGGACGGG
GCAGTGCATGCCTTTGCCAACACCCTGAGGGAGTTGCATCTGATCAACAGTAGTTTAACT
ACCTTCCAGGCAGAGTTCTCCAAGTTGACCAATCTTTGGCTGCTGGATTTGTCTGCTAAC
CGCATCCCCTCCATTCCTGACGGAGCACTGAAGAACATGTCTGGAACTCTACGGAAGTTC
TCCATGTCATCTACTCAACTTCACTACA
>NODE_35443_length_297_cov_9.390573
GCTTCCGGTGTTGAGGATGTCGTTGTAATTTGACTCCATGGGATTGTTGCTCAGATCCAA
TTCCTCCAAAACTGTTAAGTCTTCTAAAGCATCAGGAATGTAGTGAAGTTGAGTAGATGA
CATGGAGAACTTCCGTAGAGTTCCAGACATGTTCTTCAGTGCTCCGTCAGGAATGGAGGG
GATGCGGTTAGCAGACAAATCCAGCAGCCAAAGATTGGTCAACTTGGAGAACTCTGCCTG
GAAGGTAGTTAAACTACTGTTGATCAGATGCAACTCCCTCAGGGTGTTGGCAAAGGCATG
CACTGCCCCGTCCCTCAGAAACGTCAC
>NODE_35444_length_143_cov_4.671329
AAAGATTTATCACTTAGGAGAGGAATTTTCCCCGGACCCGTGCACATTCTGTCGATGTGA
TGAAAGTGGTGAAGCTGTTTGTGCTATCAGGGANGCTACCCCTCCAAATGTTCAAGCCCC
TCCTCAAGAGGGGGTTGGGTACATGTAAGACGTTCACACTTCGTCCGCCCCAC
>NODE_35445_length_41_cov_49.658535
TGGTCATGATATCGCTAAAGTGATTGCTTTCGTTCATGACTTCACGGAGCACCTAATGTC
ATTCCTGTCAT
>NODE_35452_length_396_cov_43.707069
AGAATGACAACGGGAAGACGTTTCCTGTCCTTGACGTTTGTTTCGGGTACAAGGAATGTG
TGGACGGAGAGCTGTTGTACCGCCAGTGTGACAACAACCAACGGTTTGATGAGACGTCTG
GAAAGTGTGTGGCTGATGTGTCTTGTGTCACAGCCTGTAAGGACAAATGGGCCCCACACC
CACGGGACATCTACAAGTTCCTTCTCGATGGTTATGAATTCTCCTGTCCACCAGGAACTT
ATTTCAACTACAGACTTTGTACTTGCCAACACAATAGATATCTACCCGGTGCCTACTCCT
ATTAAAATGACAGGAATGACATTAGGTGCTCCGTGAAGTCATGAACGCGTCAACTATGCA
GTGCGTCGTCTTATAAAAGGCCTGAAATAAACAACTGAACTAACAAAAAAAAAAAAAAAA
AAAAAA
>NODE_35453_length_81_cov_2.543210
TTGATCACCACCAGCTACATCATCATCGTCTTCGTCATAGTCATCCTCGGAACCATCTTC
CTCATCATAATCTCCAGCATCTTGATCACCACCAGCTACATCATCATCGTC
>NODE_35514_length_67_cov_33.000000
CTCGCGGTTGCCGCCAGTGTAGTGGTGAACGCCAGTCTTTGCCAGCATGGCATAGTATTC
TAGTTCAGACTTGCGCAGGGGAGGGCAGTTGCTGGCG
>NODE_35523_length_139_cov_14.928058
CTGATAACGTTCTCAACGGACTCCAGACCGCCCTCAGTCCACAGCTGCTTGTTGCCGTCG
GCGATGTCACGAGTGACGATGTAGACGTCGTCCGCCTGAGATGGGTGCTGGACACGCTCG
ATGATCTCCGAGAAGTGGAAGCCGGCCCTCCAGACGACGGACCCGCCTC
>NODE_35529_length_328_cov_7.304878
TTTTTGCGGTATCAGTCGCGATACTGGAGAAAGTTTCATGTTGGCTTCACCGATAGAAGT
GCTGCCACTCTAGTGCCTTTAATTGCGCACTACATTCTTCTAGGAAAAACAAATTTTGTC
TGATCAGTGATGCATTTACAAATGGAATAGCTGTTGCAGCTTGCATGGGTTACACTCACG
AAACAGCGAATCACAGCCTACATTNAGACAAAACATCCCCAAAACACCACGAAAAAGTTT
TTAAATAAATCCGGGGTCCGGATTGTACATAATCATAATCATTAACATAGTAACTAAGAG
CTTATCACAAACTATTAACTTAAAATAGACGAGGACAAATATGAACAATGACCTAATG
>NODE_35536_length_108_cov_4.092593
TCTCCTGTTACCTGGCAAGAAGGTGTACGTATCTCTAATGACGTTGACCGGAACTTTAAC
GCTGAGTGTCATCCGATTCATGGTACAGTTGTAGAGTTCTGACGACTTTGTTTCTATCTT
TAAATTATCTTTAGATTT
>NODE_35537_length_74_cov_35.851353
TTTGTATAAAATAAAATCGTCCTTTATTTTTTTATTTCCCTGAAATTATTATTTTATGAC
GTCAAGCTGTATGATGTTGACCGTTAGGCCATCCTCCAGTTTGA
>NODE_35543_length_35_cov_28.885714
CCGCTTGGTAGCAACAACTTTTCAGACACAACATGAGACCATACAACCTTCTACGATTGA
CAACA
>NODE_35544_length_51_cov_17.176470
GCAACAGCACACAAATCACTTGCACATCAGATACACATCATGCAACACACCAGATGCCCC
ATCTTGTGAAATACACGCTCA
>NODE_35556_length_277_cov_54.844765
TTCAGGAAGATTTGCCAGTAATGGTGTGTCAAACAATCCTGGGGCGATGGTGACTACACG
GATACCCTGCGATGCCAAGTCTCTTGCAATAGGTAAGGTCATCCCAACAATGGCCCCTTT
ACTAGCTGAGTAGGCAGCTTGTCCCATTTGACCATCATACGCTGCAACACTTGCTGTGTT
CACAATCACTCCGCGTTGTCCATCTGCATTCGGGGGATTATCTCCTATTAACCCAACTGA
TAGTCGTATGACATTAAATGTGCCTACAGTATTGACCTTAAGAACCTTAGCGAAGTCTTC
CAACTCA
>NODE_35561_length_82_cov_20.951220
TTCGTATATTTTTTTTACTCGTTTAATTAAATTTAAAAAAGGCAAGTATTAAAAAAAAAA
AAAATTTCAAAAAACGGGAAACTAAAATTGACCAATCATAAGATTTTACTAC
>NODE_35565_length_199_cov_2.246231
AAAGTTGTTTTACTCCTTAGAAAAAGAACGACTTCAAGAACTTAGCAGATAGTTCCAGCG
TTGGATGCGATTTTGGGCCACATCTCAGCAGACTCCTTGGCAACAGGACCAGTGATACCA
GAGCCCTTCATTTCTCCTTTGGGGTTCACAATAACGCCAGCATTATCCTCAAAGTAGATG
AAGATACCATCCCTCCTGCGCCAGGGCTTGCGTTGACGGACAACAACGC
>NODE_35602_length_178_cov_2.455056
CGCCAATTAGTGAAATAATATATTTATAGATTATTTTAGAGAATAGACGAATGTGTGAGA
ATAGCTGCTGTTTCGACACAAGAACATAAATTTTCTAGTTTTAAAAGGCACGTTACATCT
GGTGATTATGATATGTCTCGAATTGGTGGAAGGGACTGAACTCTTGATAACACCAGAGTT
GTCATCTCCCTTATCTAAGACAAACCGG
>NODE_35603_length_115_cov_3.634783
GTAATAACGCCGGGTACCCAAGCTAGTTAGTTATAAAATAAACACGACACTAAGCAATGA
CAAAGATCTACGCCTCAGTTTGCTTTATTTTTAAATTCATCATTTCTCTTGGTTCATTTG
TCAAGTGTAAGAGTTAAAACTTTGG
>NODE_35674_length_162_cov_82.722221
TCTTCTATTCCACCAATAAGACGGAAACTGCAAGACAAGGTGTGCTTCTAGCGACATGGA
TATTTCAGAGCCGATGCCCTACAACGTCAACCCGGACCATCTGAGCTGGCAGAGGTTAGA
GGCGGCACGACTCAGGAGATTGGGGATTCCGCACCGTGACTCTCCGCATTGCAACATCGT
CTACAACAGTCA
>NODE_35675_length_320_cov_23.653126
CTTCTGGTGGGTGTAGAAGGGCGAGATGGAGTTGGTGTTGTACCGTTTGGTGTCCTCCAT
CAGCTTGTCAATGCAGGGAGGGGCGGTACGGGGTTTTTGGTTCAACGCTGCGTTCATTTT
GGCGACCTGACTGTTGTAGACGATGTTGCAATGCGGAGAGTCACGGTGCGGAATCCCCAA
TCTCCTGAGTCGTGCCGCCTCTAACCTCTGCCAGCTCAGATGGTCCGGGTTGACGTTGTA
GGGCATCGGCTCTGAAATATCCATGTCGCTAGAAGCACACCTTGTCTTGCAGTTTCCGTC
TTATTGGTGGAATAGAAGAGAGACACAAGAGATCGGAAGAGCGTCGTGTA
>NODE_35733_length_364_cov_7.598901
CTCGCTTGGGTGTTGGTGTGTCTCTCAAAACCTCATACTCTCCCTTGGAGGCGACGTAAG
CTGCTGTCAAAGGCCTTATCTGTGTCATGGATGTACTTCCAAGTTCATTGCTTGACCAAT
ACGAGTTGTCAGCAGACTGGTTGGAGTACATGGACAGGTTTTCTTTCTCCTCCATTATGG
TCTTCTCAATGCATGATGTCACCCCAATTTTCATGCAGCCTCCATAGATTTTCCCATTTT
TACTGAGAGCTTTCTTGGCTTGTATTTTAGACAGGTAGTGAATGTGCATCCAGTTGCACC
CTGCAGTAACCACATGTTTGAGAATGGTACCATACTGAGAAAACTGCTGGAGGATGAAAG
ATGTGGCTCCTGGAGGAAACCCAAAGACTGTGAC
>NODE_35798_length_84_cov_210.380951
CTGGCAGTGAGTTCCTGTGAAGGCGGCTGGACACACACAATGGGGCGCATCTGCGGGGGC
AAAGCAGTGTCCACCATTTTGACAATGATAATTGACACATGGGTCAAGAATAAA
>NODE_35799_length_211_cov_5.540284
TTCATGTCATAAACATCTCTCCACTCACGGATTCACCCAAACGCCAGACTTATTTTGACC
TTGTAGCCACGCTTGTCCCACAGGTCACACTCCTCATCCTCCCCCAAGCCTGTCGTCTGC
GCACGGGCGANCTTTCGTGTTGCGGCGGCAGAAGCGGCCGAAACAAGCCCAGAGGCGAAG
ACTATTTCAAGGGCATTATTAGCTAATAACGCAGTGACTGAGAGTCTAGACTGCGCAGGC
C
>NODE_35846_length_92_cov_95.521736
CCTCATACATGGCAGCCTCCGACATCATTCCAAACAGGGAGCGCCACATTGGCTTCTGGG
ATATGTGTGACGACACCTTGACCTATGGCTGCAAGGACATGACGGAGTACCTTCATTATC
TG
>NODE_35847_length_48_cov_58.604168
AAGGACATGACGGAGTACCTTCATTATCTGGGTCAAGGTTATGACTGGGTGCACGGTTGC
CGTGCTTTGGTCATCATT
>NODE_35848_length_62_cov_151.693542
CTCGAGTGTTGTCTCCAGGACGTCCATGGCGTTGACCAGAAAGACTATTCCACCAATCAG
ATTGAAGATGACTGACACAATGTTCCCCCCAG
>NODE_35883_length_46_cov_51.217392
GGGAGTAAATGGGATCAAAATTCAGCACTCTCCTGGCCTTGGAACCGCTGAAGTACAAGT
CTGTGTTGATGTAGGC
>NODE_35884_length_86_cov_2.674419
GGAATCAGGATTTGGTCATCAACCCCAGTGCCCGACTGGCCAGCGTACTTGTAGGTGCAG
CTGAGCCCACTCAGACTACAACACCTGGCGCTTGCCTGAATGCCTATGGTCGTCCA
>NODE_35888_length_160_cov_30.937500
AAAACTGTTGTTATTTTGTAGCAACCAGGACATTTAACATCCATAAAATAACTGTTAGGG
CTCTGCACAAGACGCTTCAGCTTGCATTTGCGTTTCTCTTCCTCCAGAGAGGGATGTAAA
AGATCTTTTGCCAAAGGCATGTTTAATGTTTGTGATGAGCGAATAAAAAAGATCGGAAGA
GCGTCGTGTA
>NODE_35889_length_55_cov_140.199997
TTCTGGCAAGTAAGTGTGGGACAGTCGATGTCGGTACAGGTTAGTATTGTACTAGAACAT
GTGCAAATCTCACATGGGGACGGCA
>NODE_35901_length_31_cov_13.935484
CCCATCAGGTCACAGAAATCCAATCCTGGTTCACCCCAGAACCACGGAGTAACGACGGCA
C
>NODE_35929_length_109_cov_6.064220
GGGATTTCTACCATTTTATTTAAAATATAATTTCTCCAAGGTTATTATTTTGAACAAGTT
TCATTCCTCTAAACATAATTAACATTCTCATTTCACATCGTTTTCCGTACCAAAAATGTA
TTAAATCATATTGAAATGG
>NODE_35936_length_84_cov_47.666668
TGATGTACCTCACCTTGTTTCTCAAACTTTGAGGATCATCGTAACCGATCCAGACGTTGC
CCTTGACCAGGTAAGGAACGCCTTGATCGGTTACGATGATCCTCAAAGTTTGAG
>NODE_35952_length_64_cov_89.703125
TGCTGACGCAGCACTCGTCTGCTCCACAGTCTTTCCCAGATGAGCACGAACCGCCTGCTG
CTCTCCTACTCGGAGCCATCAATTTGCACGTCCC
>NODE_35955_length_91_cov_95.395607
CAGTGTTGTCTCAGTCCGGTCATGCTCAGGGGCAAACGAGAAGCTGTTGGCTACTGCCAG
GCCAGGGTGTCAGAAGGAGGCAAGTGTTACGTCAACAATGACCAGTTCCTGTCAAACCAC
T
>NODE_36012_length_63_cov_82.555557
TGGGCCCTTCTGGAACAGGTAGAACTCGATGCACACCGGGCCGTTGCGGAAGGAGGCCGT
GTGGAAACGAACGACCCCTGTGTGTCCAGGTAC
>NODE_36017_length_199_cov_14.844221
AAAATAGGGATAACAGGGTAATCTGGAAATCTGGCTATCCCAGTGGCGTATCTGGAATGT
CAAGTCTCAAAGCGAACGTCCGGTACTGGGCNACCACCTGACCACCAGCCTGGGGCGGGT
CTTGGGTTACGTGTTTGTGTAAATGCGCCCTGATCGGCTGATGTCCTAGCTTCTCTTGTT
GACCTCGTGTAGACTCTAGCAGGTAGTCTAGGTCGTTCAAGTCTATTCT
>NODE_36021_length_60_cov_87.316666
TTTCGTGCTAGCCCTCGACAGGCTGATGTTATAATTGTTGCAGGCACCCTCACTAATAAA
ATGGCTCCTGCTCTTAGAAAGATCTATGAT
>NODE_36097_length_159_cov_1.886792
CGAAAGCAAGGCACTGAGATCAACCATATGACGTTTGCCAACAGACGACATGTTACAATG
AGACATCAGACGTGGACGCCATGTTGTATTCTGGCGCGAGACATTGACGTGTCCATACCA
CTGAGATCCGGTCAAACTTCCTTCACCTCCACAGGTCGAGGTCACAAGAGCATCGTCACC
TCCAGAAAC
>NODE_36098_length_64_cov_1.875000
GGACAGGACGATGACAATGGAAGATTTCATCATGGCCATCTGTAAACTCACGTCATTATT
TGGCTCATTCCAAGAAGAACAAAGGTCAAGGGGC
>NODE_36105_length_156_cov_90.346153
AGTCAAAAACTCCCCCACAAGCCGGCACTGTCAGGGTCTGTTCTCGAGCCGCGAAGATGA
TGATCGCGCCAGCCGACTCCGGGAGAAATGCAGAGCCGCAGTGATCAGAATCTGTCAAAT
GGTTGTATGTGCGAACGACGTCAACGCGGGATCCCAAGTCCAAGTTCCCGTTGGTGTCCC
TAAAAA
>NODE_36109_length_217_cov_6.511521
CACCAGATGTGCTCTACAGGCAAAAGTGGGCAAGACGACCCTTAGCCGTGACGAAGGGAG
AACCAGTGCTGAAAACGTAACTGAGGGGGCACGACTTTGAAGTCNAGAGCGTATCCGTAA
AACTTCCGACTCGGTCCACAGGCTTCTACTCTTTCCTGGACCTGGTCAAGTAATCACACT
TTAATTATTCAATTTAACTCTTGTGTTGCATGTAAATAAATATACAAAACATCGACTTAT
AATAACA
>NODE_36110_length_137_cov_46.554745
GAAATATTTGATCCAAAGTTTTAATTCTTGTTTGCTGCTTATAGAATTCACTGTCTTTAT
AGGATCTCCAAGCTTCATTTCCTTGTCCTCTGTCTTTGACGCCACAACATTCCAACTCTG
TTTGTATCTTGTTCCAAACGTCTGTTATAAGCTTGTTTTCGTTGTTG
>NODE_36111_length_31_cov_9.645162
GTACTGTTAAAGCACGGTATTGTTGTGAACCGCGTGATGTAAGTGGAGCGAAGCCTGGCA
T
>NODE_36112_length_49_cov_4.714286
GCGTGATGTAAGTGGAGCGAAGCCTGGCATGAAGAAGTGAAGACGTGGGAATGGAACAGA
TCGGAAGAGCGGTTCAGCA
>NODE_36114_length_572_cov_17.000000
TGGTACAGCAAAAGATTAACCAGGCAATATAAACAACTCCACGGTAAACCTGCATTCACA
ACAAACTAATATGAGTCTAAGACAGACAGGCTATAAATAAAAGGAGCCTGNACCATGTCG
TTTTCTAATTGGTCCGTTATAATTGTTGAGGTGCCATTTGGACGTAAGTGTTGTTTGATT
ATACTCAGATTCTGTCTGTCCGATATTTATTTTCCTCGGACGAAAGAACTCTAAGTGTTG
TGGGATGTTAAAGTATATACTGTGTAAGTACGACTGAACTGAATTGTGTGAATACCTTGT
TTTGTGGGTAAGTGGTAATAGTTATAGTTTCGTTCCTAATTTATAACTTTAGTTAAAGTT
AGACCATTCTCAAATGTTATGTCTACCGAACTACGGCTTATGCTTTTTACAGCTCTGTTG
TCGACAGTCCCGGTACTGTTTCATTCGTCTGAACANTAAACCTGCATTCACAACAAACTA
TTATGAGTCTCGGACAGACAGGCTATAAATAAAAGGAGCCTGCTTTCTTGAGATTCACAA
CACCCTACAATTTCATATATGACACATTCATGCTGACTTGACTTAACACACTTATGGAAC
AA
>NODE_36119_length_78_cov_36.589745
CCTGGGGTTTGGCCTGAAGACACTCTACAAGTCTGCTTACTTTGTCATGGCCCTGAAAGC
TGTTGTCACGACATTATACGTATTCGGCATCAAGCCATCTGTATTGTA
>NODE_36122_length_71_cov_1.943662
CGTCCCACTTGTCCATGCTGGTTTTAATGTATTGCGCAATGTCTTTCTCCTTTTGATGAT
GTGATTGACCATCCACCGCCAAACGGATGATGTAATCACGC
>NODE_36146_length_68_cov_73.852943
TGCCACAATAGCCAGCTCGCCTTCATACCATTACTGGATCAGCTGGTTGTAAAGAAAACC
ATGATAACTTTGACAATAAAACAGATGCCTGGTCTGCC
>NODE_36147_length_31_cov_5.096774
CGTCCACGTGCCGCGGGACAGTTCGGCCCAGGTGTGAGTGGTCATGAAGGGCCATCGGGT
A
>NODE_36148_length_101_cov_2.772277
GTGTGAGTGGTCATGAAGGGCCATCGGGTAAATCCGTTCTTGTCATCGTCATCATTGGGG
CGTTGGCTTAAGATCATTGACGTGGTTCCCATGGGTGATGTCATGTACATGGTAACACAA
CCTCTGTAGGT
>NODE_36175_length_264_cov_6.045455
AGGCTAGGGATAACAGGGTAATAAAAATAATTCTTATCTGTTTACCAAAAACATAGCTTA
AAGATTATATTTTAAGTAAATTCTGCCCAGCGTTATTTATTAGCGGCCGCAGTACCTTGA
CTGTGCTAAGGTAGCATAATCAATTGGCTTTTAATTGAAGTCTGAGATCGGAAGAGCGTC
GTGNGAATCTTAAAAATGAATCAAAAAAATAATTTTTATAAAAAAACAACCCCGCTGTGA
CTTTGTATAAATTGAAAGTTCTAAATGTACTGTTTAAAAAAATTTTCTAGTTTA
>NODE_36176_length_41_cov_227.560974
GCCCAGGTGACACCAGCCCACTGTAACCTGGCGTGTCCTTTCAATTACGCACCTGTGTGT
GCCAGCAATGA
>NODE_36181_length_31_cov_13.838710
CGGTCTCAAGTGCAGTGAATAAAACAGAGAGGTAGTGAACGTATTCTGACTTCTGCAACA
C
>NODE_36203_length_71_cov_4.070423
TGCCAGTCAAGAGGAGAAACCATGGTAGACAAAAGAACAATAGAGGAGCAACATGCAACG
TGCAATGCAACCAGTGCGGCGCCGTTGTGGCAAAAGACAAG
>NODE_36204_length_76_cov_2.960526
CAAATCTTATCTTACGATCCTCGGTGCTTCTGACCTTCACAATCCTCAGATGGCACGCAC
AGCTGATGCAGTGGTTTTCAATGTTGTGGAATGTTGGAACTATTGG
>NODE_36205_length_70_cov_98.571426
CAAGCCATTCAATACATGGTAGACAACACACTGACACCAGAGTCTGAACTTACTCAAGAA
GTGGAGCGATATATCAAGATCGGAAGAGCGGTTCAGCAGG
>NODE_36207_length_71_cov_1.253521
TGTGACTTGAAACTAATGACGCAACACGTACTTCACGCAGTCTTCTCGTGGCGCAGGTAT
TTCCTCGAAGAAATTAACTGAGATCTGGGCCTCGTTTGGTG
>NODE_36218_length_214_cov_52.495327
CAGACATTGTAGTTTTCAAGCAGTAAAATTTTGTTGAAGACTGGGTAACTAAACTAGTTT
TTAATCCCTACGAAAAACACAATTACTGATACTTGACTGAAGGATCAAAGTTTTAATCTC
TATAAGGACCACATTAACAGATGAACCTGACATTAGCAATAAGATCGGAAGTTAAACGAT
ATATAAATTAGAGCATATATTTCAGACATTGTTTGTTAGTCGGCCTGCTGTGCTAGACTT
GCTC
>NODE_36225_length_98_cov_89.704079
AAGACAATGGCTGACTTTAATCCAGTCCCACGAAGACAAGAGGCTGTTCCGTACGTCCCA
GTTATTTTCCAAGATTCTGCTAACCTTAACGAAATTCACCAGGCTGATTGTGATACTAGT
GCGGACAT
>NODE_36228_length_60_cov_126.433334
GACATCGGGGGTCTCAAAGAAGATTTGGAAATAGATCTAGGCGATAAGGATAGGCAATGC
TGGTATCATAATGGGGTACTGCTGCGAGAT
>NODE_36229_length_141_cov_11.063829
GCCAAGAGCATGGTTGGTGAACTTGATAAAGGTGATGTTGAACTTCCAGTACAAGGATCT
TCGTGGGATGATTACGAAAGTCTGGTAGTTCCAGCGTTAGATTTTCCATAGGCAAAAGAT
GTCGAGACTGCCAAGAGATTTGATCCGACACCAGAAGATGGTATTGAACAA
>NODE_36234_length_81_cov_47.802467
ATTAGGCACTTTGTCTTGCCATTTAATGCCAAGGATGCGATGCAGGCACCTCAAGTGGAA
GCTATTAAGCTTGCGCTCATGGGATGTATAAGTGGTCCATGGACACACAGT
>NODE_36262_length_47_cov_46.851063
CTGCACTGACATCTGTAACGCTCCAGTCCCCAAGGTATATTCTGTGTTATGAGAGACTTA
CCTCATGTTAAAGTTTT
>NODE_36285_length_53_cov_91.000000
AAGAGTACAGGGCCATGGATAACATCTACAATTCAACTGGTTACCACCAGAAGGAAGCCT
TCCCCACAGCGGAAGAGATCCGA
>NODE_36293_length_41_cov_52.195122
TCGTCAACTTACACAGCTTTTATTTACAGGGACTAGTTCTTGAGAGTGAATTGCCAAACC
TCAAAAAAGAA
>NODE_36301_length_171_cov_20.198830
TCGTACTGATGTTGTGCCTTAGCATTGATGAAGCTGGCCTCCCCTCACCATGGTGGCAAC
TGACAATGGGCACTGTCGTCATGGCAACATTCAAACCATCAATTTGTTTATAGCGTCTCC
TACGGCTTACTTTCCCCTAGGTACCAGTTTGCCTTGGTTTAAAAGAATGGAAATTGTCAG
ATCGGAAGAGCGTCGTGTAGG
>NODE_36304_length_68_cov_45.823528
CAAAGCATATCGAAGCCAAACTCCTGCGACTTTCAGGAGAGGCTGGTTCTTCTATCGTCA
AGGCGGCCAACGAGTACAAGGCCACCTGCATAGTTACC
>NODE_36309_length_36_cov_17.027779
CAAAACGCACAAATCTTATAATTGGGGCGTCTTGTTTGCACCAGAAAACGTTAACTAAAT
ACTTTT
>NODE_36310_length_41_cov_3.560976
TTGATCACTAAAGTTAAGGGGGGAAATAAATGTAACTGATCACTACAGATCGGAAGAGCG
GTTCAGCAGGA
>NODE_36311_length_45_cov_27.711111
TAATGTTACTGAGGCAGTAGCTGAAAGCCTCACACAACGGCTGGAGGTAACATTGCAGAC
AGGTGCCGTAGAACT
>NODE_36357_length_31_cov_4.419355
CCCGGGCACCTACAACCTCGTCAAACAGGTAATCCAAGTACCTGACATCAAGACCATTAG
C
>NODE_36431_length_76_cov_43.263157
TAATATGCAATTGCATTGCTTTCAGAAAGAGGGGTAGTCACGTGGTTGAAAAAACACGAA
CTCAAAACAACTGTCGCCATACCCCCCCCCCCCCCCCCCCCCCCCC
>NODE_36432_length_43_cov_187.418610
ATAAAGAGACGGGACGACTAAGTACCTATTGGCCTGCATTTCTACTATGTGTTGCGTTGT
GTGCAACTCAACG
>NODE_36433_length_220_cov_88.000000
ACTTTGTGTTGCGTTGTGTGCAACTCAACGATGTTGTAGAATGCTTGCTGTTGTTTTGAT
ATTCGTCGTCCTGGCTCGCACAGGTGAGGCTATAGATTACCCATGTCCACCAGGAGTGCC
CACAAACCAGTACCTCCAGGTCTATGGCGACAGTTGTTTTGAGTTCGTGTTTTTTCAACC
ACGTGACTACCCCACGGCAGCCGCGTACTGCTCCAAGAACGGGGGGACTCTGGCCCTCGT
CAAGTCCCGC
>NODE_36437_length_41_cov_13.658537
TTATGATATTGAAAATGACATGCGCTCGCATCGAATCCCACAACCTGCTTCCAATAAGGC
ATAGTTTTTTT
>NODE_36441_length_35_cov_105.457146
GTCACATCTCCAATTGATGTTGATGCACCGCCCATTCTTGCACTGCCATTGGTGCACTGG
ATCAC
>NODE_36444_length_43_cov_132.488373
AAAATGTAGGAGCCAAATAGCTGGGCCTGTAGTCGTCTTCAACCATTGCAGCAGAAGCTC
CTCTTAGACCTAC
>NODE_36446_length_43_cov_17.069767
AAAAAAAAAATTTGTTGTCCTAAAGGCTTTCGATTTTGTTCTCAGCTCCGTGTTTTCCCC
ACGGGACCAGCCT
>NODE_36447_length_48_cov_111.354164
TTCATAAATATTTTCTAGGTCGTACTTTAAACCTCTAAATCCAGTGAAGCAAGATACTTG
TTTACTGACACCTTCTAG
>NODE_36452_length_48_cov_17.145834
GGAAGCTGATCTCAGATCAAGGGAGGGAAGGCAAGGGCAGCCTTCCAACAACTCCAGAAT
GTCTGGCTATACAGAATC
>NODE_36453_length_45_cov_4.133333
CAACTCCAGAATGTCTGGCTATACAGAATCCCTTAACAGCGATTTGAAGCTGATCTCAGA
TCAAGGGAGGGAAGT
>NODE_36485_length_47_cov_130.021271
TTGACAAGGGATCACCAGTTGAAATCCATCCCATAAGTGGATTCTCCCATCTTTCTCGCT
CATCAAACTCCATCCTC
>NODE_36492_length_237_cov_3.620253
GGAACTCCAGGACTTTGAACTCGTGAGCAACGAAGGGGATGACAACGATGGAGGGGACGA
CGAGCTGGAGAGGGAAATCCTCCAGCAGCTGGAGGAAGAGGCAGGAATNNNNNGCACAGT
ACTAGACTAAAATCAAACAAAAAAACATATCCCTATGTGATACTATAGTTCCCAAGATTT
ATACAATTTTAAAGTGGTAGTGTAGACAACACAAGTAAGAAACACTGGTAGCGTACTTTG
AAAAATTTTAATTATACTGGTCCATTA
>NODE_36493_length_39_cov_119.794868
ATTCTCTACTGGCCAGGGCCGCAATGACTGAAGCTTGAATACAGTTGGCATCAGCGCTGG
CCTGGTAAC
>NODE_36499_length_36_cov_180.833328
AGAACCTGTCATGGTGACATCACTCAACTGACTCCCACAGGAAGGCGTTCAGGAGGTGTC
GCAGCA
>NODE_36500_length_41_cov_48.073170
AAAAATAGGGATAACAGGGTAATAGCACTCGCCCTATATATGATGGCTGGGACGTGCGGC
TAGTCACTTGT
>NODE_36505_length_31_cov_59.129032
AGAAACGGGCATCAAACTTGCCAACTCTTGTACTGGTAGTGGTCACCTGCATAGCTTCCT
G
>NODE_36507_length_51_cov_31.470589
AAAGACGTAGGCGAATACACGCACGTGGAGGAGGAACTTGATGGCATGTGTAGAAACAAG
TGGTCATTTCACGCCTGTGTT
>NODE_36509_length_52_cov_64.384613
AAGTGGTCATTTCACGCCTGTGTTGACCAGCTCTGGTGGACATGTGGTAAAGATATTCAC
TGGGGTGAAGAAAGGTCAAACT
>NODE_36511_length_133_cov_3.842105
AGGTCAGAGATTGGGTCAAAAATCAAGTCATTGATGGATAAATGGAATCAGCTGCAAGAT
GGTGCAGCAGCCCGGAAAATAAGACTTGAGGATGCTATAGAAGCCCAGCAGTATTATGCT
GATGCTAATGAAGCAGAATCTTGGATGAAAGAGAAGATGCCGC
>NODE_36512_length_77_cov_2.610390
CAGAATCTTGGATGAAAGAGAAGATGCCGCTTGTCTGCAGTGATGATTATGGTAAAGATG
TTGCAAGTGCTCAGGCGCTGTTGTCTCGACACAATCGCTTAGACCAA
>NODE_36518_length_80_cov_33.599998
TCACTCCACATGGCCACGGGGCCCCCCACTGATGTCATCGGGTGGGCCCTCCGGTAGACG
TGCACACGGCTACTGTTAACATTGCCAGTCTATCACACAAGACGCCCGAG
>NODE_36533_length_72_cov_1.194444
TGAATTGACACCTACACAAAATAAAGACAGATACACTACGAAAAGATGACAATCATGACT
GCTATTAAAAATAAGGATTAACCTAGAGAAGGAAAAAAAATT
>NODE_36586_length_40_cov_266.700012
GACACTCGACGCCAATAATGACCAAAGAGTGACCAGGCAAGAGTACGTCACCGGTACAGG
CAACGGTTTC
>NODE_36587_length_99_cov_5.565657
CATCCACTGTAAAGCTTGGGTGTCGCGTAAACGTGACGTCACATTTTGCTCTTACTACTT
TATAACATTTTTAAAAATGCTAACGGTACATGAGCTTCTGTGGTCTCACGGTTAGGACGT
AAGATTCTT
>NODE_36592_length_156_cov_5.551282
TTTAACAAATTTGTCCTTGTTAAAAATGTCTAACACAGCTTTTGTATCTGAGGCTAAGAC
TTTGAGTAATGACTGGATTGTGTCGACTGACCTGTGCTCGTGTATAATAAGCAGTTTTAC
TGTGACAACAAGAGGTTGGGCAGCTGAGATTATAGACCAATGGAAAGCAGAATATCAACC
ACCCAA
>NODE_36593_length_69_cov_6.101449
ACTACAGCAATGACGTCATAGCCAGGGCCAAGTGGCTCAGAGCCAACGGCTGGAATTAAC
ATTTTAAAAATAGATTGACAAATCTAATTGACAAATCGT
>NODE_36611_length_71_cov_54.647888
AAAAAAATACTTTTTACAATAATTTGTTTAGTGTAAAATCTTTTAACATTCTACTTGACT
AGGTTGGGTCTCACACATCGCATTCACACAAAGAACATCCG
>NODE_36641_length_78_cov_80.538460
ATCGATTCCAGGTCTCTCTTGCTTAGGATCGGATTTATAAGTTCTTGAAGACTCGGATGG
CCTGTTGTCGGCAGAAAAGACTGACGGCGTTTCTTGCTAGCAATCAGA
>NODE_36680_length_58_cov_44.137932
TGCAGTTGATTACCCGCTTCGTTTTCGACCTCGGGAGGAGCCGTCTCTTTGATTGTTCCA
TTCTGGGTCATGTCGATATCTCCCCGGA
>NODE_36683_length_42_cov_45.666668
ATGACCGACTTGAGGAGACCGGGCACGTGGGTAAATGCGAGACGTGTTTCCAGCTCAAGT
ACAAGCAGTACG
>NODE_36684_length_31_cov_70.193550
CGTGTTTCCAGCTCAAGTACAAGCAGTACGAGCTGAAGAAAGAGCATAAGTTGATATCAA
G
>NODE_36709_length_71_cov_114.042252
AGAATCAAACAGACAGACACCAGGAAAATGAAAAGCAGAGATGCAGACACCATGACTTGC
ACTGACACAAACCAAGGGGGCGACACCCACTCCCAGATGGG
>NODE_36716_length_31_cov_66.612900
TCTATGTCAAGAATTTTTGAGTTGATAATTGACTGCAGAGATCGTGCCTTGCCATCCACC
A
>NODE_36717_length_90_cov_33.911110
AAGTTGTTGGTAAGGCCATGAAGTGCAGCCATAAATTCATTCCACTCTTGTTCTCTGCGC
AGTCTTTGTGACTGAAGCCAATCTGACTTTATTTCTTCAGATCGGAAGAGCGGTTCAGCA
>NODE_36729_length_41_cov_209.414627
ACAAGCCTAAAGCTACTTTCATCAGTCAAATACAAGCTCCTATTCAGTGTCTTCTTCGCC
CTGGTGTTTGG
>NODE_36731_length_31_cov_29.193548
TCACCATCCCTGTTATAATCACATAACAAATAATCTTTTCCTACAGTCTTGTCACGAACA
A
>NODE_36732_length_55_cov_122.872726
ATACTTGTTGGTCAAGTTGGATTTGTGATCATCGTCCAACGTGTTGAATCTCGTGGTCAA
ACTTCCTGGACGTCGTCCGTGGGAA
>NODE_36763_length_82_cov_30.268293
GCAGTTTCTTCTTTAGGCTCCACAATACTAACATGATCAGGTAGTGGACGTCTGGGACCC
ATCTTTCCAGTAGGATCCCAAGGCAACATAATTTTCACTTTGATACCAAGAA
>NODE_36818_length_31_cov_206.580643
ATTGCGGGACCTCACACAGAAATCTTGCTGGCAGATGCTCTTTGTCGCCTAGGATACAAG
G
>NODE_36820_length_60_cov_110.933334
GCTCTTTGTCGCCTAGGATACAAGGGACGTCGCCCAACACACATGCGCATTCCACGCCAA
CAGCGATTACCCTGTTATCCCTATTTTTTT
>NODE_36821_length_231_cov_18.186148
CTGGACGAGGTGCACTGCACTGGAACCGAAGACCACATCGCTCAGTGCGGTATCAGCCCA
CAGATGTGGGCAGTTCACGACTGCAGTCACGGTGAAGACGCCGGTGTTCTCTGTGAGCCG
TCACAATCCATTGGAACAGACAGTTTTATTGACAATTTCATCGTGTTCTGTGACGTCAAC
ACTGGACAGTTGATTCGAATGGATCTAAACACGTTCAGCTTTACTTACTTACCAATACCA
TCGTCACCCAATCCGGTTGCC
>NODE_36857_length_46_cov_164.630432
GCTTACAGTTGAAGGCTGTAGCGAAGTGCTTGCTATTGGACAACGCCTGTAACACCCTGT
ATTTAGGTTGGGCAAA
>NODE_36858_length_107_cov_2.037383
CTGAGTCCGGTGTTATGGAAGCTCATGACGTCATATCTGATCTTAGGCGTGGTGTCTTTC
GCTTTGATCATCACATTTTTAGACAGAATTGGAGCAAGAGCAGATCCTCATGTATCTCAT
ATGTTTCACGTTTTGTA
>NODE_36859_length_82_cov_1.963415
CGTCTCTGTGTGTCCTATTTATAGCGAGTGTCTATTCCCACGGATAATTGAAACCATTCC
ACGGCCAAAGCCCTATATGTACAACTTTGCAATAAGACATTTAGTTGTTCTT
>NODE_36860_length_34_cov_57.764706
CGCACCGCTTGTTGCAGATTCCATTCAGCGTGCCGCAGTAGCTGCCCAAGAACGGTGAGG
TCAG
>NODE_36866_length_93_cov_163.741928
CACGCCATGTTAATTTGCTGACGCTGCGGCTCCGGGGATGATCTGACCGACGACTGAGGA
GATTGTGGTGGCCACGCACTGGGTGCCGCAGATGAGGGTGCCCTGGAGGAGGGGGTAGAA
ACA
>NODE_36867_length_74_cov_1.243243
GCCCTGTACAGTTGTGCGTTACCACATACATGCGAGAGTCTGGTTTCAGTTGGAGCTGTT
CTTGTAACCAGGCAATCATTTGTGTTAAGTTGGCGTTGTGCCCA
>NODE_36868_length_121_cov_1.958678
TTCTGATTACCATGGCAAAAACAACCAAATTTTCAGTTATTGGAGGATTTCTTCTCGTTT
CCGTCATTGGGACTGTGCTAATTTTCAATTTCGCTCTGCGAACTACGAGCTCTGGTCGCT
TTCTGCAGGGCGACAATAGCAACAGTGCCAA
>NODE_36904_length_44_cov_323.250000
TCATGTTGCTCAGATTTACGCTATCAGACAGGCAATTTCAAAGGCTATTGTTGCATATTA
CCAAAAATATGTTG
>NODE_36909_length_51_cov_287.137268
GTGCGGCGACACCACAACCGGTGATGGCTCAGGAGGTATCAGCATGTACGGAGACACATT
TAACGATGAGAACTTCCAGAT
>NODE_36910_length_331_cov_9.990936
CGGGCGAAGTGGTAGTAGTCTGAATACTTGTGTTCTGCGTTGTGTAGCACTTGATATCCC
AACTGCACGTAGGTGTCCACCGCCATCGGGTCTCTCAGGTGGCTCTTGGCTCTGAATTGA
TCTGCCAGGTTGGCTTTGGCGTTGGCCAGACTCACTCTCTCTCCGGCCCATCCTTGCCAG
ATCCTCAGGATGAACGGCAGGAGTCTGCAGGCTCNGGAGTTGGTACAAGACCCTGGAGAA
CTGCGATCCGTTGACCCAGTTCTAGAACGACGGAGAACGCCAGTGCTATAACGAAGAACC
GAACGGTAGCTACCTCCAACCCAAAAGTGGGTGACACGACGACAACTCGAATCCCAACAA
G
>NODE_36928_length_211_cov_9.938389
CTTCAGTCACAGATATCCGCTGATGTCTTCTGTCACAGATATCCGCTGATTTCTTCAGTC
ACAGATATCCCCTGATGTCTTCAGTCACAGATCTCCGCTGATGTCTTCAGTCACAGATAT
CCGNAGAGTACACCAGTTAAGAGTTTATTAGAGCTCGAGGTTCGGTGGATATCTTACCTG
GTAACTAATAACGTCAAATAGACAAATAAAATAATAATAAATAATAATGACAATTCTTCA
G
>NODE_36929_length_38_cov_63.789474
AATTGAAGTTCTTGAAGTACTTGAAGAAGCGTTGTAATGTTAACCCTGCACGTGGACCTT
TCCATTTC
>NODE_36930_length_33_cov_120.333336
GTTAACCCTGCACGTGGACCTTTCCATTTCCGTGCTCCAAGCAAACAGTTCTGGAGGGTT
ATA
>NODE_36946_length_56_cov_5.375000
AACATCAATGAGGTCACTAGCGAATACCTTTCAAAACCCTGGCTTCCTTTGTCAAGAAAA
GTCCTAGATCGGAAGAGCGGTTCAGC
>NODE_36947_length_198_cov_14.898990
AAAAATAGGGATAACAGGGTAATATGAACATTGCCAGACAAATAGTATTCGAATACTTGG
CGGAAAGTTTTGAAGAAAACATCGAGTCTTACAAAAGTATAATTGATGCAGTTGTGGATC
GCTACGTGGATTGGGAGCGACCGGATGATGCGAATGCCATTAGCAATCGAGTTGTTGCCA
TTCTGACGGATGTCTTCTTTGTACTTCCTGTTGCAGAAACCGCCCTGG
>NODE_36993_length_31_cov_1.000000
TCCATTTTACTTTTAAAAAAAGTTTTTGTTGTTTAAATTAACATGAATTCTGGTAACATT
T
>NODE_37010_length_76_cov_60.407894
ATTGTGTTCCACTTTTCCTCGATCTGAGCTTCGATCTCCTTGATTCGATCAGGATCGACA
ACGTCTGGGACAGCCTCAGTTACGCTAGCATTGCCATAAAGTGCTA
>NODE_37017_length_55_cov_58.799999
AAAAATAGGGATAACAGGGTAATAAGGGCTGCTTGCCGGCGAAGATGAGTCTCTGTTGAT
CTGGAGGAATACCTTCCTTGTCCTG
>NODE_37076_length_37_cov_163.918915
TACAGAAGCAACATATCTCACACCAAAGTACCAGAAGATTATACTAATTGCAAGTGACCC
AAGATGG
>NODE_37084_length_57_cov_121.754387
GAGTCCATGTCCTACTATGCTGTGTGCACCAAATACTTTCTGTTACACTGACTGCTTCTT
CTGCTCTGGATCGTGCAGACGTTTTGT
>NODE_37087_length_76_cov_149.407898
GCCCTCAGGAAACGAGTGCAGGAAATGGAGAAGCTGCTCCGGTCGATTCATCAAATCACC
GAATCCCGGGAGGGAGTCATCGTCCAGTTCGACGAATTCGAAAAAA
>NODE_37098_length_149_cov_6.832215
AAACATTATAAGTTGGGTAAACAAAATGACTGACATTAGTGAAGAGTTGGATCTTAGTTG
TTGTTCTATAAATAAATACAATTTTCATCACAAAAATAAGCCCAGAACTTCTTGGTTACT
CCAAATGACTTTTTCAGCAGACAAACACACCTCAGTTACAAAGACTTGGAATAAAACAG
>NODE_37101_length_200_cov_3.080000
GGTTTTTCTTGCTCGTAGCAAACACAAAGCAGCAATCTCGTGTAGAATATGGAGTAAAAA
GCAACGACGAAAAGTCGGGAAGACCAAACACAAACAGGTTGCAAGAGAAAGAAAGCGTAG
GCAGGCTGACTAAGAAGGTGGTCTTGCTCGAAAAACAAGTGAGAAAAATCGAAGGACAAT
CGATTTCTGTTTCTTGTCTATACATGAGAAATAATGGACACGTCGATGCG
>NODE_37120_length_40_cov_94.699997
ATCCACGCCTACACGGGTCGAGCCGCCCTTGACTACAACGGTTACCATAGCACCACCTGC
TTGATCCCCC
>NODE_37131_length_64_cov_14.703125
TTATCCCTATTTTTTTTTTTTTTTTTCAAGGTAGATCATCTTTATTGGTGATTATAAATA
GGAGCCGTTGAAAGCTCTCGCATTGGTGGACTTT
>NODE_37132_length_35_cov_52.000000
TTGTGTGGGGGCGTGTCTGCAGTTGTCCTGTTCATGGGGTAAGTCACAAGATGATGTTAG
CTGGG
>NODE_37134_length_63_cov_15.952381
TGGGATTGCTGATTTAATGAAACCACGCCCATCAACCCTGTGATTGGATGGTGTGAATTG
TGTGAATGTAGAAAGTTGTGATGTAATGAAAAA
>NODE_37178_length_33_cov_351.090912
TGGAAGATTGTAGTTCTCTGGGTCAGCTGTTTGGTCAGTGTATGTTATGGCCATATGTGC
CTG
>NODE_37179_length_85_cov_4.376471
TTGGATTCAGTGTTATTGGTCTATTCGTTTCAACACTTGCTTGCTCGACCGCCGTTACAC
GTCGTAGAGCTAGAGAGCGGGAACAACAGAAGGACGACCTGATCAGGGCGGAACT
>NODE_37180_length_76_cov_2.842105
GAGGACGTCACACTGCTGGTGACGACTGGCGTGTCATAAGTGAGTGTCGACAAAGTTACT
GTTGGTGAGGTTATTTCCCCTTATCTTCTGTTCGTGAGACTGGCAA
>NODE_37293_length_77_cov_50.480518
GGTGTGCCATCCAGGACTGTGCCTTCCCGCCTTGTCAGGAGTACCACACGCCTGCCGGCC
AGTGCTGTCCTGTTTGTACTGGTGAGATCGGAAGAGCGGTTCAGCAG
>NODE_37342_length_69_cov_218.391312
TTCTTGGAGAGGGCTACAGAGTTGGTGAACGGCTTCAAGTTCAAGTCGACCTACTTCGCC
GGTCTCGGCTACTTCATCGACAGCATCTATGGAGTGGAG
>NODE_37346_length_36_cov_144.222229
TTTAAGGTTTTATCCCAAGTATTGCCTCATCACCCGACAATGACCGTAGACACGTATTTT
TGACAC
>NODE_37347_length_40_cov_243.274994
CAATGACCGTAGACACGTATTTTTGACACGATGCGTAGGTCTGAAAGGACGGGTCACGGA
CGCACAACTC
>NODE_37348_length_55_cov_87.145454
GTACGCCGCAGCCAGGCTCAAGGACCTCGGCGTCGACGTCACTTCCGCCTGTCCGCTAAA
AGTGGACGCCTTCAGCGCCGTGTCC
>NODE_37379_length_111_cov_2.027027
AGCAGCAGTAAGGACCCATGAGTTTGATATTAGAGAACCTCCACACGTCATACTTTGGTT
TGCGTTGATAGAGAGCAAAAATACTTGCCACGGCCAGGCTTTGTCTGGGGCTTCCTGTCC
ATTAACGATCGCCCTTGTAAC
>NODE_37380_length_75_cov_1.240000
AACCCTGGGAACGCATGTCAATGAACCAAAGTTACCGTATGATGAAACTTTACAAGATCG
ACTTTTTGTAAACTTTAGCTGTGGTCAGCCTGCTATAGACATTAC
>NODE_37381_length_69_cov_2.144928
TTGGCAGCGGCGTATCCGTTGTTGTTGTTGTTATTGTCATAAGCTACGGCTGGGTCAACA
TAGTAGCACGAGTTGTCAGCCACACATTTGCCAGAGTAA
>NODE_37386_length_41_cov_123.902435
AGGATTCATGAAGGGTGCTGATGAAGGAACACCTTCTCTGACTCCTCTCAGCCTACTCTG
GCAGTGAGACA
>NODE_37388_length_121_cov_4.768595
TCGGTGCTTTAATGTAAAGTAAGCAAAAGTACGCGTTAATACAAACAGGCGAAGACGCGC
TTTACTATACAGTAGGCCTGTATTTGAAGTTATTACTATTATTTTTTCAGCAAATTAAAC
GAGTTTATTCGCAAGATGTCATCGCCTCAAA
>NODE_37392_length_36_cov_9.500000
TGACTCAGACAAAATTCTTACGTCCACTTGGATTCCTCAGAACGACCTTCTCGGTCATCC
CAAGAC
>NODE_37394_length_69_cov_2.202899
AACGACCTTCTCGGTCATCCCAAGACAAAAGTCTTTGTTACTCACTGCGGACAAAGCAGT
CAGTATGAAGCCTTGTTTCACGGGGTTGCCACTTTGTGT
>NODE_37406_length_123_cov_38.650406
AAAAAAATAGGGATAACAGGGTAATACCGTGTCATGTGTTTGTGGTGTGCTGTGTGTAAG
AAGGACGAACCACTAACAATAATAGGCTAGCAGACGACATGCCTATTATTAAAATAGAGA
CCAATGTGGCGGCCAGTCGGTTTCCGGAAACAT
>NODE_37435_length_135_cov_2.303704
CGACAATGCAGAGTGGGAACCTTCCCTATTCCCATTCACCGAAAACCAAGGTGACGGATG
GCACGAAGTTCCCCTATTTAGCTCCAACTTTGGCAACTGATGGGCCCGAGTCTACTGGTC
CCCCAAAAGCCGCCAGTGAGACGGTCTCCACAAAAAGTGACGTTG
>NODE_37436_length_100_cov_3.340000
TCCATATCTAAATCTTTCGTCCTGATCTCCACACCATATTCACGAGCACTTCAAGTTGGG
CTAAATTAATGTTGAATCGCATTGCTCCAAAAGTGGTTCCGACATGTCCTTTCGTTTCAT
AGCTTTGAAC
>NODE_37482_length_34_cov_226.500000
ATACACAAAATCTATTGATTAGCGCCGCGTCCATCAGTTAAGACGGGGTTGGCCCCATCT
TCCA
>NODE_37502_length_51_cov_66.803925
AGAAGAAGCAGTCAGTGTAACAGAAAGTATTTGGTGCACACAGCATAGTAGGACATGGAC
TCACGCAACCATTGGAGCAAG
>NODE_37543_length_213_cov_64.718307
ATTTGTTGTCATTGATACTCTCGACCCCGGCTATGACTCCGTTTCCCGGGCATGTGTAGG
CCAACGGCTTGTCGTACTCGTTCACGTAGCCGCTGGAGCCACAATTGTGAGTGTACCCGA
CAGTCCTGCAGACAAACTCCCATCGTCTGTCATCGTAGTAATTCTCATGGACGCTGGAAA
TGTACATTATCACCTGGCCATCTGGACATCTGAACTCAAAAGAGATCGGAAGAGCGTCGT
GTA
>NODE_37544_length_206_cov_15.655340
AAAATACATATCTGTTAGTGAAAAAAGACAGTCTCCACTGAAGTCGGGAAAATAGCTTAA
TTATTTTTCTTTAAGGGAGAACCCTGATATTTGGTTGTTTTTGTTTGTGTTCCTTGTTAC
AAAGTGAAATGTTATTTCATTTATTAGAGTAGTTGTGTGTATGTGAGCTTTTCCCATTGC
CAGTTGTTTTACAACTTTTGCTCTACTAGTAGTAAGTTCCCTCTCAGACCATGAAT
>NODE_37571_length_31_cov_1.000000
AACGATTTTATAGATCTGCTCAACATGGGAGTGCAGTATGACGTGTTGATCTTCCCGACC
C
>NODE_37574_length_386_cov_22.668394
ATCAACCACAACTTTTCACAACAAGTTTTAAGAATGAATGAAGAAAAGTACACTTTTGAA
AAACCCAATCCTTTTGTTCAAGGGGAAGATGACACTGAAGTTGCTTCAGTGGGATATAGG
TATCGCAAATGGGATCTTGGTAATGAGATAGTTCTGATAGCAAGAACAGAACATGATGCA
GTTACTAATGGTCCTAATAATGAAATTCAATTTATGAACATCAAGGCTTTAAATGAATGG
GATTCAAGATTTTCAGGAGGTGTAGATTGGCGAAGTCGCTTGGATACACAGCGTGGTGCA
GTCCTTGCAACTGAACTGAAGAATAACAGCTGTAAACTTGCCAAATGGACCGTTAGTGCT
CTGTTGGCTGGATCTGATCAGATCAAGTTTGGTTATGTTTCCCGCTTGCATGCAAA
>NODE_37575_length_263_cov_12.197719
GTGTGCCAAGCAGTACATGCTTTGCAGTGTCCTTTGCATGCAAGCGGGAAACATAACCAA
ACTTGATCTGATCAGATCCAGCCAACAGAGCACTAACGGTCCATTTGGCAAGTTTACAGC
TGTTATTCTTCAGTTCAGTTGCAAGGACTGCACCACGCTGTGTATCCAAGCGACTTCGCC
AATCTACACCTCCTGAAAATCTTGAATCCCATTCATTTAAAGCCTTGATGTTCATAAATT
GAATTTCATTATTAGGACCATTAGTAAATTACCCTGTTATCCCTATTTTTTTT
>NODE_37576_length_63_cov_98.269844
TCGTTGGTTGGGGCGAACAAGGTGAACGGACCTGGACCAGAGAGAGTGTCTTTTAAGCCA
GCTTTATTGATAAGGGAGACAAGGCTGTCCAGC
>NODE_37580_length_55_cov_58.218182
TCCTTATATCCCTGGCCGCGGTCAAGGCTCAGGTAGACAAAAGATTTCTTTTCCTGGACT
CGAGATCGGAAGAGCGGTTCAGCAG
>NODE_37581_length_31_cov_9.612904
CCCAACTTCAGAAGGGCTAAAAAAAAAGTCTGGCCCTCTCAGTAGATAATGGCAAAATAA
A
>NODE_37584_length_370_cov_10.105406
TGGCAAAATAAAGCATACCTTCAAATATGACTTACTATGCACCAAATAAATGTTTGGGGG
AAAATAAAATTAAAGTAGAATAGGGCTATATACCTAATCCTATCTTATGATAGTCTAACC
ACAACATGAACTAGGAAATAATAAATGTCAACATATGCATGCAGCCANGATACGTGGTTT
ATTTACAAACCCCCTTTTATTTTAATTTCATCTTATCCCGATATATGGATTAGGATAGAA
TACTATCAGATTGGTGTTGTACTTGATCCTTTATTATTTACAGTTGTATACGTACGTCGG
TATTTAAATCATGGGGTGGATACGGAGAGATTTAACCTTCTTTAAAGCATGTTGTAGTTC
AATGTTCTTTAGGGAACGTTGGTCGTTAGATTGTTTTTTT
>NODE_37642_length_52_cov_126.057693
TCAGGTTTATTGACTTATCACGATGTCTTACCTATTCGCTATTCTGCCGTGCCTCCTGAG
ATCGGAAGAGCGGTTCAGCAGG
>NODE_37705_length_49_cov_226.142853
GAAAGTTCCTAGCCTTGATTTTGATTACACTGTGTGTACTGGAAGCGCAATGTTGGTATA
TGCCTAAACCCGTAGAAAT
>NODE_37706_length_74_cov_3.756757
CCTGCCGGTTCCTGTCATAGTCGCCAACTTCAACAATTATTACAGACATTATACAGTACT
AAGAGAGAATGAGATTGACGTCATTACTAAAGAAGAAGTGTCTA
>NODE_37711_length_159_cov_155.352203
ATCCCTATTTTTTTTTTTTTTTTTTCACTGTATTTTAATTTGTTTATTATGTATTGTATG
TACAGTCATCAAAGCCAAATGGTTAGAATATGAACATCTTAACTTGTGAACTGACAGTGA
ATATGGTTTCCTTCGTTCTGGCCCCAACCTCCCATTGCGGTGCAGGTCTGGAGGTACTCA
GCACTTCTG
>NODE_37738_length_131_cov_5.290076
CAACATTGGTGACGTAATTGATGCTACAACGGAGCGACACATATACCAGGTCCGTCTGAG
AGACCACCTCGTGAGTTCTTTGATCTTCTCCAAGGCACGTGACATGGAGCTGGCCTGGGT
AGACGGACAGCTGGACATACCTCCGGTGGAAGAGAAGGAGG
>NODE_37744_length_36_cov_76.861115
TCACATTCACAGCGAAGCTCGTCACTGGCATCCTGGCAATCATCATCACCATCACACTGC
CACCTG
>NODE_37802_length_112_cov_104.285713
TTCAATTTACGTAGTTTGCTGTCTTACAAAGTCTAGCCAACAGTCAGATCGGCTTCACAT
GTCATGAGATTGCCTCTGGTGACGTTGTGATAGCCGGTAGGACATGTGCTGCCCTGAACA
CATATGTACCGAGGCTCGGTGA
>NODE_37803_length_55_cov_171.272720
CCTGAACACATATGTACCGAGGCTCGGTGATTTCTACAGTTCCTGAAATGGTCAGCCCCC
TGTAGACGTATTCAGACGTCCTGTT
>NODE_37806_length_42_cov_157.952377
GCTACATCCGGCATTCCCTGCCCTAACCCACCCGACCACTGCCAACACGACGTCTACGCC
AACGCTGTGGTG
>NODE_37807_length_109_cov_2.954129
CCCACCGCAGGCTTGTTTCACCTGTATCGTGTCCCAGCCGTAAGGATAGATGGCCAGCCC
GCCTCCTATTAGCAAACCTGCACACAACTGCATGACTCCTGTGAACCTGGCCAGTCTTGC
AGTGATGATGTCCCTCACG
>NODE_37808_length_104_cov_2.221154
GGGCGCTATTCGGATTTCCTGGACATTCCAAGTATTTTTTGGCAGATAGGTACGGTGACC
ATAGGAACTGGCGCCTGTCTCTCACTGCTGATCTCTATGACTGCCCTGGTCTCGCTGTGC
GTGAGGGACATCAT
>NODE_37810_length_317_cov_11.886436
CGATTATTTTTCCTACAATCATCCATGTTCTATGTTAAGTCTTACATTTTCATTAGAGTT
TTAAATGTTGATAGTGTGTTCCTTTCCTGATTACTTCAGGCCACCCATTCTACGCCTGAA
TGCTAGGCGAGAAAATGGATTTGCAAGTGTTAATACTTGTTAATGAAACAAGAAAAGTGT
TTCATCCCTGTGTCTGTCCGTATTTAATTAGATTATTCTTGCGATGACTTCCCNGGAGTT
CTCAAAAGATAAAACAATAAGATAGAGTACCACAATAAGGTATACAATTTTACACCACGA
CAATTAAAATCAAACTTAATTTCTTTGTTACCATCTTTTGACATAAC
>NODE_37821_length_192_cov_19.625000
GTTATCCCTATTTTTTTTTTTTTTTTAAGACAAAAAAATGAGGTTTAATGATGTTCATCC
AAGTAAGTTTAAGCTCATTAGTAATCGATTATGAATGACGAATGTTCCATTTGCTGTAGA
CGACGTAGCATTCGGACAACGATTTTTTCAAGTATTGGATTCGAGATGAAAGTCTTTCGA
CGACTATCCGGGCTAAGGTGTAGATGCTGTCACCTTGACCCT
>NODE_37822_length_73_cov_93.520546
ATGGTCACAGAACCGCTACTAACAAAGAATTTTTTATTAGTTCCATCTTCTTCAAATACA
TTGACAACACCTGGTTTCAAGACAGCTAAAGTAGGAACATGGT
>NODE_37832_length_31_cov_333.580658
TCCGTTCAAGATGGCGTCCCTCGTTTCAAGTAAAGTTAGCCGGGTTACGCTGCTCTTAAA
A
>NODE_37834_length_118_cov_62.449154
AGTTAGCCGGGTTACGCTGCTCTTAAAATCATGTTCACGTTTGATGGCTGTCACTCAAAG
AAATTATGCCGATATGGCCTTCACATTTGCTTCTCCTTATGATGTATATTACAAAGATGC
CAAAGTAAAACAAATAGATGTTCCAACA
>NODE_37868_length_33_cov_98.393936
CCAGTGTTCTGCACATCTTGCACTGACGCTGAATGCACGGCGTCCACCAACGTCGCCTAC
TGC
>NODE_37876_length_94_cov_15.531915
GGACGTTTGATCCCACCAGAGGGCGCGGCATTCAGCCCTCGAAGCGCAACTTTTAGTCAA
ATGCCTTGTCCCGTCAGTAGCGTCATCGATGGTCACCTTACAGAAGCCTTGCAGGCAGTA
GGCG
>NODE_37879_length_81_cov_161.296295
CAACTCCCAGCAGTCGCAGACGGTGTCGTACAGAGTTACGTTTCCCTCACACAGTTTGAC
CAGTGAGTCGATGTTGGCGTTGACGAAGGCGGTCAGTGGAATGGACACGGC
>NODE_37880_length_86_cov_14.220930
TTTTTGTTTTGACTTTCCCCCATGAGGTAGCGGCCATTGACAATGCCATCTGTAAGGAGA
CGGATTGCTTGCAGCAGAGAACTACGTTTTTTAACTAAATCCACCTTATTTAAGAC
>NODE_37945_length_92_cov_55.173912
ACCTTTTTGGCAGAGTCTGGCACACACTGAGGTAAATCAGGGATGCTGCTAATGACTGAT
ACGGTACAGCTGTCCGGTGTGATGTCATAGCGCTTGCCCTCGTTTCCGGAGAAGTCTTTG
AC
>NODE_37951_length_150_cov_99.573334
AGCAACCAACTCAGACCCAATGAAGATGTGGCGCGTCTTATCCATGATTGTGATTGTGAT
TGCGGGAGGAGTGCTTGGACAGCTCAGACCATGCCTGCCGGATCAAATGGAGTTTACGGG
CTATGACACGTTTGGGAGAACATCTTACAACGCCGTCGACTTCACCAAGAAACTCTACGG
>NODE_37952_length_71_cov_1.943662
ATAAAATATTGCTAACCAATGTTTGAATCAACATCTAACAAAAGTATTCTTTTCTTAAAT
CATGCTGAGAAAATAATTGATTAAATTAACGGTGATGATAT
>NODE_37953_length_98_cov_1.602041
TGACCATAGAGGTTATAGAGATGACCATTACACTCCAAGTGTAACTTCAAGCAAGTCTGG
TAGCACTGCAAAGCCTTCGAGCTCTACTTTTGTGTAAAATCAGTTTTAAAAGTTGTGAGC
TTCCCAAT
>NODE_37954_length_91_cov_47.351650
AACCGCCGCACAGCCTATTGGGATCTTCGATGGCTGGCGTTGTGGTGATCGTCTCGCTGG
TGACGGGTTCATCACACTGACGCACGGGATTGGCGTCTGCTGTGAGCAACAAGGTCAAAA
C
>NODE_37966_length_31_cov_42.258064
TGCACCAGTCGACACTAGGGTCTCTACCTGCGCTGTCGTAGGCTGGAATGATGACAGCCT
G
>NODE_37987_length_34_cov_2.264706
CCCACTGCCCAATGGAGATGGGTGCAAGGACAGAGGAATAAACTGCCCTGTGGTCAAAGG
TCAA
>NODE_38026_length_216_cov_5.277778
GGGTAATACACACCGCCCGGAACCAGCCAAGATACGGGAACGACACGTTTCCTGAATGGA
ATGAAAAAGTGAGAGGAATCTTATGGAATGTCCAGGCTCGATGCAGGAAACTCTCCAACT
CATCCATGTCCTGAGGCTGATATTCCTGGGGAACCCATCGCCCGGTCAACATCGTGTCCA
GGTGACGTTGTCCCCAAGTATGTTGCTGTACTTTTGTGAACTGCTCTCTGAAATCTATAA
CGTCTT
>NODE_38027_length_110_cov_3.109091
GAAAATGGTGTCAATGCTCCTGTTTAAACTTTCGGCCAATAGTTTTCGTTGTTGCCGTGA
TGGGAGTCTTCACCTTGGCCAGATTTTTCGTTGTAACGCGAGTAGAAACCCGCCCAGGTA
CAAAAGACGTTATAGATTTC
>NODE_38028_length_71_cov_1.028169
CGTTCACGTATGAATCTAGTGCTTCACTTAATTCCTTGCAATGCATCAATGTTACCTTGT
CTTACGTATGACGCATTCTACAAACATGTGTTCCGGAACCT
>NODE_38030_length_40_cov_10.400000
CCTACAACAGCCGGGACATCTTCACACACTTCGAGGACACACCAGTGTACATTTGCTTCA
CGACGAACTC
>NODE_38031_length_153_cov_12.294118
AGCCTCGTCTATCTCCTTCTCTGATAACCCGGACTCCTCCGCCGGTGCCGGACTGCTGAG
TGCAAAACTGCACATGTGCACGGCGAACAGCAAGACGAGTAGCCACGAGTGAGACATGTT
TGGTTCTATTCAAAAGTCTGAATTAATAATGTCGACCGAGTTTCCAATCCGGGAGTACAG
ATG
>NODE_38090_length_62_cov_3.145161
GATTTGTTGCTTTAGGTGGGGGTGTAGACTAGAGGGTAACAGCAACTTAAATTCATGACT
TCTTGCCTGATGATGAAAACATGACTTGTTGA
>NODE_38156_length_107_cov_57.373833
GGACGCCGTCAGGTTGAAATCTGTTGAAATCTCTGACAGCATCGTTGTAGTTGCCTGGTC
TGCCGTACTGTCTGGTGGTGCGAGCGCCACTTGTAGTAACACGCCCAGCACGTGACGCAC
TGAAGAGTGCACGACCT
>NODE_38157_length_42_cov_28.428572
TTAATTATTGTATCTGTCCAGAGTGTTGGGGCCGCACCGTCTTCGGGCACCACCCACCAC
CTGCAAAAGCGT
>NODE_38158_length_31_cov_11.451612
TTGCATTCGGAGAAGTTGTTCATGCCCCACCGGTGTTATCAGTGAGACCAAAGAAAGCTG
T
>NODE_38162_length_33_cov_134.787872
ACGACTTCAACAACGACGACGAGGTCAACCATCGCGACTTTGACCAGTTCTTCGCCCTGG
CCG
>NODE_38198_length_31_cov_66.290321
TGACACTGTCAAGAGACATAGATCTGCTATTGATTGGGAAGACAGGAAATGGAAAGAGCG
C
>NODE_38199_length_259_cov_31.992277
GATTACTGGCCTTACCTGTAGGGTTGCTATCTATAGATTCAACAAACTTATCTTTGTCTC
TGGACAACGTTTGAACAGTCAACTTAATGCCTGAAAGTTTATAAAATGACACTGTCAAGA
GACATAGATCTGCTATTGATTGGGAAGACAGGAAATGGAAAGAGCGCGCTTGGCAACACA
ATCTTAAGAAGAAAGGCGTTTCTTAGCAGAAATTGTCAAGAGTCTGTTACCAAAAGAGTC
GCTTACGAAGTGAGTGATTTTGATAACCGCGTCATCAAGGTTGTTGACG
>NODE_38200_length_292_cov_22.256849
GATAGCCTCGTGAGTTGGCTGAAATTGCGTACTCCATGGCTCCCATCACTAGATTGACCG
CCTTCTCATTGTCCATGCGTGTGTCCCCAACACCAGGTCCGTCAACAACCTTGATGACGC
GGTTATCAAAATCACTCACTTCGTAAGCGACTCTTTTGGTAACAGACTCTTGACAATTTC
TGCTAAGAAACGCCTTTCTTCTTAAGATTGTGTTGCCAAGCGCGCTCTTTCCATTTCCTG
TCTTCCCAATCAATAGCAGATCTATGTCTCTTGACAGTGTCATTTTATAAACTTTCAGGC
ATTAAGTTGACTGTTCAAACGT
>NODE_38259_length_51_cov_113.274513
AAGATGCCAATCCCTGTTGATGAGAAAATGTGCACAGTAGGCATCCCACCTCCATCCTAC
ACCACAACAGCTGTTCAACAG
>NODE_38266_length_40_cov_1.200000
TGTGCACATTTTCTCATCAACAGGGATTGGAATCTTCTCAATTTCTTTGGTAATCACCAC
CTTCTTTTGA
>NODE_38267_length_45_cov_1.133333
CACTATAGGCTAGGGATAACAGGGAAATTAGAAATAACAGGGTAATCACTACACTAATGT
TCTCTTGTACATTCT
>NODE_38335_length_134_cov_2.731343
TGCCCTTTGACTTTCATATGCAACTCTTCGGAAATCCACCCACCATCATGGAATTTATTT
ACACACATGAAAAAGATACATTTTAGCATTATGCTTTATATCTCCTGGCTAGGGTGGTAC
TAGAATGCCAAAACTGTGTGAACACCAGCGTAGACAAAAAAAAA
>NODE_38345_length_38_cov_95.947365
CATAGTTGGTGACACTCCTTCTTGACAGCATGCGTGAGAAAACAACAGTGACCCGGCGCG
ACTTCCGT
>NODE_38349_length_47_cov_68.468086
TCGTCATTATATTTTTAAAATGAATAAGTGGTCTGAAGATGACATATTGGAAGCAAAGGA
AGTTTTTAGCATGTTTG
>NODE_38350_length_62_cov_44.112904
AGAAATCTTCAATGGGAGGCTGGATTCGATTTTTACTGATTGTTTGGAGGATTGGGAAAA
ATGTCTCAAAAGAAATTCTTGCCGCAGGATTT
>NODE_38364_length_40_cov_94.300003
TCACTGGTTCAGTAACCCCCACCTGACCGTTTACTCGGTAAACTATACAGATAAGATTGC
TACCTGCTTA
>NODE_38367_length_174_cov_38.701149
AGATAAGATTGCTACCTGCTTAGATTCCCCGACACTGTGGCCCTGTTCTTACAAGGCGTG
CCGTTGTGACGTCCAGTTCGCCGCTTGCCTGGCCAGGACGACATTCAACGATGCTTATAA
GAGGTACAGCAGGGANCTTCTCTGATTAAATTTTGTGTTTAATCTGAGAATGAGGTTTAC
TAACATCTAGAGACGATTTTAAAG
>NODE_38374_length_93_cov_74.612900
TGGAGCTCTTAAGGAGGGCGTTTGAGGGGGCGTTAGAAGGAGACGAGAGACCTTTGCTGG
CCATGGGAATGTCAGATAGGTCATGGCATGAGGTCCAGTTCGTGTTCCAGAAGCTTCATG
ACA
>NODE_38404_length_59_cov_7.101695
TTGGTTATTTTTGGGCTTGATGACATTTTCTTTTGTATTGAATAATTCCTTAGAGTAAAG
ACAGCAGATCGGAAGAGCGGTTCAGCAGG
>NODE_38408_length_297_cov_8.289562
AACTGAATTGCTCGTTAATGAAACCATCACTGAGTACTGATGGACACGGGTCAACTCTAG
AACTCTAAAAATACGATTTCTACTCAACTATTTCACATGGAAGGCTTACTGTAAATGTAA
TTAAGTAATGCGTTATAAAAAAAATACATCCACCTTTTCAAACGTCAAGGTTTAAATTCT
AAAATGTAAGCTCGCAGTGACTCATTTGTGCTGTGTAAAATGTTATGCGCATTTCTGGCC
AGTAAGAAATTAACTATATTTATCACTTTTTTATACCTTTAGTTCAGAAAACATTTAAAG
ATTTAATGTATTTTGAAAAGATAGGTT
>NODE_38484_length_88_cov_45.045456
AAAAATAGGGATAACAGGGTAATAAGAACATGACGAAGGCGACCTGGTGATCGCTTAGGT
ACTCGTGGAAGTTTTGGGACATAAGACCAGAAACCTTGGAGCTCTCGATGAATGCATC
>NODE_38562_length_50_cov_1.160000
GACAACAGGACTGTCAGGCCGGGCACGACAACCGTGAAACAAAAATTGAAAAGAGAAGCA
ACAAAATCGAGTACCAGTGC
>NODE_38563_length_41_cov_233.219513
GTGAACACATGAGTGATTCGTCGGATGCAATAATAAAGTGTTTAGAACCGTCTGGCGGGT
GACCCAACTTT
>NODE_38565_length_31_cov_2.612903
TCTGAACTGAACAATCCGGCACCACGACAACGTTAAATCTTATGATACGAGCGTTGCTGG
C
>NODE_38575_length_62_cov_59.306450
TTTCATGGTTTCATCTTTTATTTACAGTCACAGGGTGGCTTGAAGTTTTCTGCTCCTGGG
GCCACGTAAGGCAGGAGTGGATAACTGATAAC
>NODE_38578_length_47_cov_46.148937
ATCCAGAATGTGAGATCCTCTACATGCAGACCGACGTCAATGTGTTTGTTGGAACCTTCC
CAGACTGCACCCGTTGG
>NODE_38635_length_35_cov_25.971428
TTGTCCCCACCACTACTAGTAGACAGGGGCGTGGCTAGTGTTGGTATCACCCGGTGTTGT
CCCCA
>NODE_38636_length_215_cov_4.879070
TGAGAGGACCTCTAGAACTACACTTCCTCAATGATATGAGAATAGCTGAAAATAGTTATA
AATCATGTCTAGTCTAGGCATATTTAACTATAAGATAATGTGTAATAAATTTACTGATTA
CATAATGATAATAGCCAGCAGGGGATAGGTATTTAAAAATTACATTCATATTTCTTTTCT
TTTTTAAATTAAAGAAGAAAAGTTAAAAGTGCCTTTCAATGACATGTGAGAGAAACGATT
TCCCT
>NODE_38651_length_77_cov_44.922077
TAAAAAAACAAAATGAGAATCTAAAACACAGTATAAACTGTTCATTAATGATGTCCTCCA
TGCTTTTCTCCTTTGTTTGTAAGTTTGTCATAAGCTATGGTCAGAAC
>NODE_38698_length_83_cov_111.493973
TGGTACCCAGGTCTGGCCATGGGCGCCCCGCGTGCACTTCTACCTGTCGTGATGGGCACC
TCGTACATGTGGCAGTAGGTGCCTGGCTCACAGCTGCAGTAGCCGTTCATCTT
>NODE_38699_length_195_cov_3.487180
ATCCCTATTTTTTTTTTTTTTTTGATGTTTTCAGAATTAATTTATTTTTTTAAGTTGCTG
TGGTCACCGCACGTGGTGTTGTCATGAGATGAGTGGAGCGGTCCGGCCAGCACCTATTTT
GATTACCCCCCTGGCTCCGCCACAGTGTGTAAGTGTAAGCACGGGTATCCTTTAAAAAAG
TTGAGCACTGTTCTATTTACACTTACACCGAACACTCGCACTGAG
>NODE_38705_length_112_cov_81.294640
TGGATAGCTCGCGTGAATGGATGGTTAACCCACGGATTATCTCACTGACCATTGCTGCAG
TCATCTGTGAGCATCCAATGCCAGTTAGATCCATCTATCCTTTCACCAACAGACTTGGCC
AGTGACCCTTTCAGTCTCTTTG
>NODE_38715_length_31_cov_3.838710
TTGGTCAAAGTTAATGACACCATTATGGTTAACATTGCTTCAGGAAAGATGAAAGAGTTC
A
>NODE_38725_length_137_cov_1.817518
CGAACGCAAGGAGAGGAACCAAAATACCGCGTTGGCCATTAGCGCAATTGGCACCCTAGC
CATCTACTCACTTGCTAAGCAGAACATTGTACTCCCCATCTTCAATCGCTTCAGCAGACT
GCTCAAAGTGCACCGCCTCTTCAGCCAGTACCTCACCATCCTCACCC
>NODE_38726_length_107_cov_78.233643
CTGTTGGCCCCAGGTTCCTGGAGACCGAACTGGTTGCTAGGGAAACAGAGGATGTTGAAT
TCGTTCGGCGGAAGCCAGGCCAGGAGTTCGTTCATTTGTATGTACTGGTGGGTGAAGGTG
CAGAAAGTCGCCACGTT
>NODE_38733_length_32_cov_20.406250
AAGAAAGTCCTCCGCTGACCTGGAAGATCTACCAAGCCCCTAGTAAGTTCTAATGGAAAC
AT
>NODE_38751_length_228_cov_42.078949
GATAATGGCTGCTATACACTGGTGCATTGTGGTATTGACTTTGTTGTTTGCACTCGGTGA
GTGCAGCTTTAGCAAGAGGAAGTTCAGTAAAACTGCTCAAAGATATTCCCGAAGTCTACA
GGACTTAAACTACCAAAAGAGACAAGGTACCTGTGGTCCTGATCAGTTCCACTGCAACGA
TGGCGAATGTGTGTCTATAGAGTGGTACTGTGATACTGACAGAGATTGCAACGATGGCAC
TGATGAGCTCAACTGTCC
>NODE_38778_length_47_cov_37.042553
CAACCAACATTTTCACATCAACTATAAGCCTAACAATGACACAATTTGAAATCTTGACAT
TTACAAACCTAAAGAAA
>NODE_38782_length_189_cov_52.703705
AACAGATATTGGTCTGGGCTTGTGCTGGGGGGTGGAGAATCTACTCCCGATTCCTCCCCA
TACTTCTTGTATGAAAGGCGGCATTTTGTGCACAGGACGCCGCCGTCCTTAGCATTGTGC
CAGTCTTTGGAACTTGTAGTAAAGCAGCGCTGGCATCGACTAGCTACATCCCGGCTACCA
TCACTTTCTTCCGACTCTTCACCTGCTGACTCACTGCCA
>NODE_38783_length_198_cov_33.590908
CAGCTGAAAAGACAAAGTCCCAGAAATAATCAGCCTGATAACGAAGTGAGTACTGGCAGT
GAGTCAGCAGGTGAAGAGTCGGAAGAAAGTGATGGTAGCCGGGATGTAGCTAGTCGATGC
CAGCGCTGCTTTACTACAAGTTCCAAAGACTGGCACAATGCTAAGGACGGCGGCGTCCTG
TGCACAAAATGCCGCCTTTCATACAAGAAGTATGGGGAGGAATCGGGA
>NODE_38786_length_191_cov_13.329843
CTCCCTGTGCTTCTTCACCAACCCTGGCAAGGCCTGTAACATAACCCTGAACGGCAGCCC
AGTGACCATCATGACCTACAACAATAATGGACATCTGGCCACAGCCTATNTGTTGATGAG
TTTTACTATCTGTTCAGTTATTGTGTTGAGTCGGTCGACTCTCCTTACTTTCTCAACGTT
ATATTCAACTGAGATGATTTTCTTTACTCGGTATCCTTGAT
>NODE_38790_length_80_cov_134.975006
TGTCGATGCCCTGGCTAAAGTCGTCATCAGACACTGATTTGTAGGAGCCGTCATCAAATG
GTGACAAGAACGTGCTGTCGTCAGACGTCTGAGGGGTTTCCTGCAAAAAA
>NODE_38791_length_103_cov_3.203883
TTTTATTTTCCCGACCTTTCTTTTTCATATGTCGAACAAGACGTGATAAGGACAATGGTG
GTCGGTTGGTTTTCGACATGAACAAACGTTTCAATATCGTTTGATTGAATTTTGCACCCG
TTCGTCGTGCCAA
>NODE_38801_length_44_cov_136.090912
GTCTAAGAAGGCTCTCCGCTATGTCAGAAATGTCGGGCTTGGTTTCAAGACTCCAAGAGA
GGCTATAGATGGCA
>NODE_38803_length_39_cov_63.589745
GAGCCTTCTTAGACTTCCCCTGGAGATAAGCCTTCTTGTTCAAGAACACTGTTGGCTGCT
TTTGAAAAG
>NODE_38872_length_38_cov_52.710526
AAAAATAGGGATAACAGGGTAATTTTTCGGTTATTTTTAGCTTTAGTCCGACGCAGTGTA
CATCAAAA
>NODE_38875_length_33_cov_11.181818
GGACATCTTCTAGGAAGACTTCCACTTCGTCAGATTCAACCCCAACATTTTCCGTAAACC
AGG
>NODE_38881_length_927_cov_19.467098
TCTCGGGGACATCACTGTGAACTGTTGTAATGATGTTCCACATGAGCTGGTGTGTCTGTG
ACATGAGTGTCTTCAACTTGGCCAGTTTGGACTCGAGTTCGAACCTCTCCAGTGAATTAC
TGGCTGCCTTCTCCAGACGTTTCTCCAAAGTTCTTAGGGTCACGAGCTCGCTGGGAACCT
GATCTGTGGGATCCATGGGTTCAAAAACCTCAAAGCTGGTATTCATCTTGACGTACTCTT
TGTCATTGCCGAAGAATTTGTTCAGAGAAAATGTGTCGATGGAAAGGTCGCCATATTGTT
CCACGTGACTTTGATTAGTTTCAACCTTGACCTTCTTGTATTGCTGTTCAAAAGTCTCCT
TGCTGAGATCCGCAGCATCGGTGTCCTCCATCCACTTGACACTGTACGTGTCCCCGAGGT
AGGTGCTTCTTGTATCGTCCCAGTAGCAGCCCCAGCTTGACTCTGTCGGGTTGGCTGCTG
TGGTGGCGTACACGTTGATGTCCTTAGGGAGAAGTTTGTTGAAGATTGAGCCGGACTCGC
AGGCCTCCACGTAAAACACAAGCTTGGCGAACTTCTTCTTCTGGTACATGCTCTTGAGGG
CCGTGTTCAGTGCGCGGGCCTTGAGGTAGGGCTCCGTGGGCATCCCAAGGATACCTGGGG
CGCCGTGGTCAGCAAAGTTAACGAAGACGTAATCTTCAGGACCAGACTCTATCACCTTTC
CATCTTTACCTGTCAGCTGACGGATAGCCTCCTTATCGCCCTGAAGCACGGCGAGGAAAG
TCTTGGCGTTGACATTTCTCCCCGTGTAGTCCTTCAACACACCTGGGTAGACGTTGGGGC
CCTTGGGACGGTTGATGACGTTTCCTTTGACCGGGTTCTCCTTGTTGTTGGCGATGTCAT
CATACATCATGACGACGATCTGCTCGTCTGGAATTCCAGCCTTGTGCAGGATCTGGT
>NODE_38889_length_79_cov_116.316452
GTTATCCCTATTTTTTTTTTTTTTTTATCTGTAAAATTTTGTTCTCTTTTTAATTACTAT
TTTTTAACACTGGTAATGCACTCTCAAGTGCCCAAACAGCCTGGACATT
>NODE_38890_length_185_cov_70.059456
CGAGTACAACGCCAAAGTCCAGCCAGCCAAATTGGCGCTGAAAGGTGCGTCGTTCGTGGG
CTCAACATGCGTTATGACTGGTTGGGGACTTGTCAACGGCCTGGAGGAGACCTATCAGCT
CATGCAAGCCAACATCACAAAAATAGCCAACGCTGAATGCCAAGATCTGGTGCACAAGAA
AACGAAAGGAGAAGATCGGAAGAGCGTCGTGTAGG
>NODE_38908_length_124_cov_133.548386
GAGACTGAACTTTGACCTCCACCGTTTTCGTATCCGTGTTTCCCGAAGAGTCAGTTGCGA
TACAGGCGATGATGTCGTTCATAACACACGTGGCCGCTACTGAGTTAGTGATGCTTCTTG
ATGAGATCGAAACACTCGGACCTCCAAATATGTA
>NODE_38911_length_155_cov_10.612904
TTTAATTCTGTTGTTATCAGAAGTTATTTTTACTTCATCAGGACTATAATGACGGAGATC
TAAGCGAACTTTAAACTCCTTGTCTGTGTTCTGTACCTCTGAATCACCAAGCCTTCCACT
CAAATTAGCAAGGGTGCCATCTCTGTACAACATTGGTGATCTGTAGTCCCATGGATTCAC
AAATT
>NODE_38912_length_380_cov_17.755262
GAACGATTGCAGAGTCAAACCTATATATATATTATATTTTTTAATATGTTGTCGAGAGAT
TTCTTGGTACATTAAAAGTATCTTAGACGCATAATANTATATTTTTAATATGTTGTCGAG
AGATTACTTAGTACATTAAAAGTATCTTAGACGCATAATATACGAATAAAAAGATAAATA
ATACAAATCTATGTTATGTGGTATATACATTTTCCCCCCAATTTTTAGACGATGCTACTC
AAATACTGGCAAACACAACAGGCATAAGTAATTAAACTCCAGCCTCAGCCAGCTCTGATC
ACTGCGCTGTTTGGCCAAGGTAAGCTCCCAGGAATAGGGTGACCTTGTGGAAAGTGTCTT
GAACCATGTAGACAAAGGGTCGATCATTACCCTGTTATCCCTATTTTTTT
>NODE_38923_length_32_cov_71.375000
CATGAGGAACACTGTTAAAGATCATAATAAACATTTGAAAAGTTCATGACCACTGACGAG
TT
>NODE_38925_length_38_cov_48.184212
AAGCAACAAAAAGAATTTGATAAAACAAGGTCTCCTCAGCAAATATGGTAAACCAAATGA
AAAAACTC
>NODE_38929_length_106_cov_48.433964
CACTGATGACGCAACCAGCGGAGGCAAACTTCGTGGGGGACTGCTGGGACACGTGGAGCC
GCTGTTCTCGGTGGAGCAGTTTTCTGAATGGCATCGCTTGGGCCTCCTGTGAAGAGAGGT
GTCGACAACTTCGCTA
>NODE_38948_length_89_cov_56.876404
CTGGTACAGGCAGTCTTGTTTTACCACCTGCTCATCATTCGTATTGTTCTGGGTCGCCGT
GTGGTTCGCAGCCCATCGCTCAGGTCCGCCCTCTTAACTCTTCCTAGCACCACTTTGAT
>NODE_38949_length_36_cov_143.916672
CCTCTTAACTCTTCCTAGCACCACTTTGATCTCACCGCCTGTCTTCCTCTCATCCCGGTT
CATTAA
>NODE_38990_length_180_cov_66.677780
ATATATTACCCCTCTTTCATTTATAGATGTTAACATTTTCTCCATGAGTGCTAGACTCAA
AGAGAGATGTCACTTGATGGAAAACAATACATTATTTGGATGAATTGGAAGCCAAGGCAG
AAACACTGTTTGTGCCCAGAAGCAACTTCTCCACAATCAAAGCTTTGTCTGTGGTTTTCA
GCCAATCCACAATAGGATGCAAATTTTCCT
>NODE_38997_length_35_cov_83.685715
GTGCACTCAATGAAGTGGACGCAGCTCCCAGGGTCGGGGTAGATACCGTCAGGTAGTTTG
TACAG
>NODE_39027_length_55_cov_172.309097
AGGAGTGGTCATCACACTGGTCAGTCTCGGTTTCCTGGCCTCTTCAACGGATGGTGCGGC
CTTTATGCAGATAGGTGAATGTCCA
>NODE_39050_length_84_cov_1.202381
GGACAACTTTGAGAAGGGAAATACTGCATCATTTCAAGATTGGTGTGAAGCTCAAGCAGG
ATATTTTAAGTCTCTTTACGAAGAGTGCAATAAAAGATGTGTACTATTTGATAA
>NODE_39055_length_43_cov_20.046511
GACACACTTGTCATCCAGGATTTCTTTAAATTGTTTGATGGAAGCACACACCTTACTGAC
GTCATTTCCTGAG
>NODE_39058_length_46_cov_23.021740
AGCAGAACCAAACTGTCCGCGTCCAAGAATGTCAGGCTTCTACTTTGGCCAAGTTAACCT
CAGGAAATGACGTCAG
>NODE_39117_length_95_cov_7.715789
AATACTTTGTGTACATTTCAGGAATATTTCGTATTTATCATACAAGGATAAGTTACTTGT
GTGTGAGACGTGTTGCTGTGTTTACATTGGATGAGAATTCAATGACTTGACCTAGTATGA
AACAC
>NODE_39178_length_108_cov_3.166667
TTTTTTGCTTGAAAAGTTTAGTCTGTATAGTGGGTTCCTTGGGATCTGTGGAGCCAAGTC
TTTTCTCCAAGTGAAATCTCATTACTTCCTTTTCTGCATCGTCATACAATAGAAAAGATC
GGAAGAGCGGTTCAGCAG
>NODE_39179_length_133_cov_6.548872
ATAAGAGAAGCACTTCGAATGTCCATGGCCATACCAGGAGTTTTCACAGCAAGGATCTAT
GACAACCATGGACAATTTGATACATACGTAGATGGAGGAGTCTTGTGTAACTATCCCATA
CAATGTTACGATGGATGGTTTCTTTCAATGGACAAAGCGGACA
>NODE_39246_length_37_cov_225.945953
TTGGACATTAGCTTGTTTACTTGCCCGCCAGTATACCCATGAACAAAGCTTCCCTTTGAC
CTCTGCA
>NODE_39255_length_177_cov_7.672317
AGAGAGGGGGACTTAGTGAGGCTTACCTATACAGACGTTCTTTCTATACAGCAGATTATT
GCGTCCACAGACCATACCGGTCTGTTAGGTACCCNNNNNNNNNGTATTAGTATCGGACTA
GTATACTAAATTGCCGACTTGACTTCGCTAGCTCACAACAATCTATGTAGGTTCACAAAA
AAAACACACAAAGGACTGGGTCGTTTT
>NODE_39257_length_513_cov_3.859649
CATAAGAGCTTCCACTGCTTCCCATTTGTCTTTATTTATTGAAACTTCCACTAAAGATGT
TGCACTTTCATTGCTCACAACTAAAGGCTTAACACTAAAATTTGTCAGCATCATCGAACC
TACTTTGCGAGCAGAATGGATGTCTTTAGTGCTTACAGTACTAAGTTCTCTATTGTGTAA
GTACTCTCTGGTAATGTAGGCTTCTAATGGTACATTGTGAGGACATGCAGGCACTCCTAA
TGTGATCACTAGATAAGACAAGAACTGTTGTTTCTGGGCACCAGCACCTGCAATATATTT
TTCTAACATTTTCTTTGACTCTTTGGTTTTACACAGTAGCATTACACCACTGTAGAAACT
TTTGAGAGATAAGCCCACTTCCAGTTCTGGACAATGTAACTTTTCTCTTAAAAACGGCAA
GCAATGGTGAATAGTTGGTTTCAGCTGGTTTGATGCATCCCCAGCTTCTGATGTCAAGTG
GTGGCTTGTACCATAAACTGATATTCCACATGGCTTGTTGATGGCAACAATTTTACCATT
TCT
>NODE_39258_length_532_cov_4.902256
ATCTTGATACAAAAAAAATAAAATGTTATGAAAAACATGCAAGTTACACAACCATAGCTA
GCAAGGGTGACACAGCTTGTGATGGATTACACAGTTGCAATAGTGAAACTCTCATCAATA
AGCAGACATATGCTTCAGAAGAAATTCTGAGCAAAGTTATATTTAGAAATGGTAAAATTG
TTGCCATCAACAAGCCATGTGGAATATCAGTTTATGGTACAAGCCACCACTTGACATCAG
AAGCTGGGGATGCATCAAACCAGCTGAAACCAACTATTCACCATTGCTTGCCGTTTTTAA
GAGAAAAGTTACATTGTCCAGAACTGGAAGTGGGCTTATCTCTCAAAAGTTTCTACAGTG
GTGTAATGCTACTGTGTAAAACCAAAGAGTCAAAGAAAATGTTAGAAAAATATATTGCAG
GTGCTGGTGCCCAGAAACAACAGTTCTTGTCTTATCTAGTGATCACATTAGGAGTGCCTG
CATGTCCTCACAATGTACCATTAGAAGCCTACATTACCAGAGAGTACTTACACAATAGAG
AACTTAGTACTGTAAGCACTAA
>NODE_39339_length_70_cov_106.900002
AAACCTGAAGTACTTTGCGGGCAACAGTTGCAGAAGCTAGGCAGTGATGGCTAGGTGTTG
TTCCATTTCGCTGATTGCCTCCATATAGTTTTCTCAGAGC
>NODE_39404_length_104_cov_92.951920
ATTATACTAATTGCAAGTGACCCAAGATGGCTAAACTTACGCTCATCATTCTAACAGCGT
GCCTTGTTGCAGCCACAGTTGACGTGAGCTGGGCTGCCACGTGTTCTTGCACTTCAGGCA
CTAGTGGATCTGTT
>NODE_39405_length_49_cov_141.877548
GTGTACATTAACATTGGACGCTAATGTTTATTGTGTCTTGGCAGCTATTCTTCTGTCTCT
CTCCTCAGCAATAGTTAGC
>NODE_39422_length_113_cov_134.398224
TTTTTTACCGCGACCCAGAAGAGGTTGAGAAAGAAGAGAAGGAAGCTTTGGAACGAGCAA
AGGAGGAAAACCCTGCACCTCAGCAAGATTGGAACCCAGATGCAGGTATTGTGTCAGAGA
TCGGAAGAGCGTCATGTAGGGAA
>NODE_39457_length_108_cov_2.620370
TTCAGACCACTGAGCTCCCTGCTTCATGTACTTGAACTCAGCGTTCCTGTACAGAGAAGC
TTTTGTTTTGAGCCTGCCATCAGTTAGCATGAAATCCCATGACATACAAAACTGGTGGAC
TATCATACTGAGCTTCTT
>NODE_39477_length_67_cov_3.104478
CGGCACTTGACCGGCCTGGAGGAGTTCGACATCGTGTACGCCGATATCACGGACTGGAAC
GTCCCAGCGCTCCGACAAATCGGCGCCACTGTTAAGA
>NODE_39478_length_64_cov_4.812500
CTGAGATGGCGTTTGGAATGTCCGCGAGTCTTCCAACTGAGAGGGTCAGAAGGTTAAGTT
TATTGTTGACATGCGTCAGGGCGTCGTCTGGGAT
>NODE_39486_length_78_cov_162.666672
CCAGACAGTGAAGGTCAAGGATAAAAGGGTGACTGTGTCTGTAAAGTCACGGAAAGTTAC
AGTCAAAGGCCCACGGGGAACACTTGTCCGCAGCTTCCAACACCTGCC
>NODE_39515_length_67_cov_169.776123
TTGACGTCTTGGGCGAGGGTGAAGTGTCTGTGCCCTCGCATTTCTTTAAGGTAATCATCA
TTGAAACACATGACGGTAACCTGGAGCTGGAGTCCTA
>NODE_39543_length_171_cov_45.035088
GTAATATTGAAACGCCTGTTGCTTAACGTAACATAAGAAAGAGTAGATAAATAAATTCCA
GGGGTGATACTTCCGTGTTTTAATCGAATAAATAAGTCATAACTCTTGGAGAATTTATTT
GGAATAAGTTCCAGTATTCACACACGTGTGGTTGATTTCTTGAGCTTAACACCATAAGTC
ATTCAAGAAATGGAAAGCAGG
>NODE_39544_length_104_cov_50.923077
AGAGTCCCAAACTTACTGGCGTAAATGGATTGTCGAACTTTGATGCTCTCAACCATTCAG
TTGTCGCAATCCCAGCAATGTCCATGATGAATCCAAAGCCGAGGGTGGCCAGTCCCACGG
AGTAACTGGACGTT
>NODE_39547_length_491_cov_10.378819
CCTCACAGTTTTTTCAACAGATATGAATACTTCAAACACTATTACAATCCTCTCAGGACA
TAAAGGGTTTGTTAATTCCATCACATATGAACCCGATGAAGGCACTAGATTGGCAAGTAC
AGGAGATGATATGACTTGTCGCATATGGTCTCTCACAAATGTCAAACAAGAATCCATCTT
TCAACTTACATCACCTGGTGTCTCAGTCTGTTGGCATTCAGATGAGCGATACAAGTTGAT
GGTAGCACAGAAAGATGGGACCATACGATTTTTTTNGTCAGACAACCGTAAGTCTACTCG
CTATGTTCAACTACCATCGTGTCTTTCTACCCTGGTATGCTAAAAAAAGGGACGTATTGT
TAGTCGGTTAGTACTCGAATTCAACACCAGTTTGTGGTGAGAACAGTCGACTAACCAGCT
CTGTATTGTTAGAGGAACAACCCCGACACCGGCCGAGTCTGACCTACTATAAACTACAAA
GAGCAAGTTCGTGAGGATAACTTTTCGCTGTTCGTGTATTA
>NODE_39583_length_197_cov_49.005077
CTTCAGAGTGCTGACAATTTCTATGTTAAATCCGGGGAACGTATCATACATTCTAAACGC
CTCTAGAATATAGAAACTGAGCACGAAAACAAGCACTTTAATGATGGATATTCATGTGTT
TTGCCACCTGGGAAGCCACTGGCACCTCCAGCGCCCCCCGTTCCACCAAGAACGCTTAAC
AACGCTGAGGTGTGCAGGGCCTTGCTCAAATCTTGTCCAGATAGCAA
>NODE_39585_length_54_cov_119.222221
AGCTCGCAGTGTTCAAAGTAAAAAGTTTAAACACCTTTACGCCCTAGCGACTCATGACAT
TAGTGTTAGCTAAACATTCATGCT
>NODE_39589_length_132_cov_2.181818
CCTATTGATGGTGAAAATTCTAGACTTCACCACTTCAGATCCGATGTACCATTGAACAAT
ATCATTGGCAAGCTGCAGAAGAAGCACCCCAAGGCAGCCATCAGTGATGATCCAGGAGAC
TATCTCTGCAATTACATTTACTACCAAGCCTCTCGACTCATG
>NODE_39597_length_31_cov_57.741936
TACAAGTGAGATTTTTCAGGTGGTCTCGTCCCAGGCAAGGCCAGAAACCACGGGCTCAGC
A
>NODE_39599_length_31_cov_39.322582
AGGCAAGGCCAGAAACCACGGGCTCAGCAGTACATAGGTTATCGTGCGGTCAAGATTAAA
G
>NODE_39600_length_33_cov_93.696968
GTAGCACTGGTAAGACCAGGTGTTGTTGCCGTTGTCCTGGTAATAGAAGCTGTCAATCCT
AAG
>NODE_39609_length_101_cov_3.683168
TTTGTTTAAAGTTTGGCTCATGATGTAGCTGAAAACTGTAGTCTGTGCTCCACAAATAAA
TAATTAAAAAATCTAACTGCTACCTCAGTTATACTGTTTCCATATCATCACAAAGCCACA
GACTCATCACA
>NODE_39610_length_76_cov_3.118421
GTTGACCCGATTGGTCGTGTGCGCCTGTGTCCCGCATGTATGCATCAGAGACACCAAAGT
TAAGATTGCTGCATATGTTCAGATACTTTTGGTTTACTTTTATTTA
>NODE_39611_length_32_cov_288.625000
TCAGCCGACAGGAGTACACCAACTACGTCAACAGCCACACGCCGTCCCTGGTCCCGCTGC
AC
>NODE_39614_length_31_cov_30.677420
GCCAGGTGATTTCGTAAAGGGGCCACTTATTCCAGGGCCACTAATCTCAGGGGCACTATT
A
>NODE_39641_length_46_cov_99.304344
CAATCAGTCTTCATCGTCCTTCTCGTCGCCACACTCTGCTGTTGGTGCCTGTCTACGACT
GACGCCCGTTACGCGC
>NODE_39642_length_190_cov_154.878952
CAGCTTTCATCCAGTGGTTCTGTCAAAGGTGACTGGAAACATTCCCTTCCCACAATGGTG
TAAGAAATTTTCTTGTTGTAGTCTCCAATAGTTGTGACAGTTGTCAAAACACTGGCGTTG
ACCATCGTTAACTCATTGACAACTTTCATCAGGTCGTAGTCCACGTGAACGTAGGTCTGG
ATCTCAGCGGTGGAGGCGTAGTTACTGACACTGTCAAACA
>NODE_39665_length_110_cov_101.599998
ACGCAGCACTTCACGGGCTAAGAGCCACCACATCAACCCAATGGATTGAGCACCTTTGTT
ATTGCATGGAATAGAAATATCCACATGCAGCAGTGGTGAGTCAGTATTGCAGAAAGCAAT
AACTGGGATGTTGACGTAAG
>NODE_39666_length_76_cov_65.092102
TTCCTCCACTGGGTCCACTCCTATTGCTGGTCGCTTCACGCCTGGTACCTTTACCAACCA
GATCCAGGCTGCTTTCCGTGAACCACGTTTGTTGGTGGTCACTGAT
>NODE_39815_length_36_cov_27.250000
CTCTTGATGTAAAAACTCAAAACGTAGGGTGCCTTTTTCCGGTAGTCCTTCGCCGAGTTC
CAGGCC
>NODE_39816_length_44_cov_47.090908
TTATTTGTATTTTGGAAAATTCTGGTTCTCTCCAACTTCCCTTTGTGAGAGCGGCCCATG
CAGTCTTCCTGGAC
>NODE_39819_length_74_cov_100.297295
TACAGGGCTACCTGTAAGACGCTGACCATGGCTACAGGGCTACCTGCTAGTTGCAGTTCT
TCTTGTTGTAATGGGTCATTGATTTATTGAAGGTCGCTCCATGC
>NODE_39820_length_216_cov_1.777778
ATTGGAAATAAATACCTATGAATTAATCCTGTTATATATAATTTGTCTGGAGAAATTGTT
TATTGTTTGGATATTTTATTTACAGGAAAGATTGCTGCAATTTCAGATTTTTTTGGGGTC
TAATGTATGCAGACGATTGATGCGTCCACAGATCATTCCGGTCTGTTGGCAATTGTTGCG
TCACAGCTATGAGGGTAACACGCATTAACCCAACCAACTATGTTTTCCCTTACTAGTGTT
GGGTAC
>NODE_39821_length_97_cov_2.072165
AAATCAATGTGAAGGCATGGATTTTTTACCAGTGCCTTGAATCCGCCGAGCCAAAAATGG
GTACCCAACACTAGTAAGGGAAAACATAGTTGGTTGGGTTAATGCGTGTTACCCTCATAG
CTGTGAC
>NODE_39825_length_37_cov_50.378380
CCCCAGATTTCGTACAGCATCGCCTCGTTTTCATCAAAGATTCCAAAGTGAGGCTTGCAG
CACGAGT
>NODE_39889_length_120_cov_5.341667
AAACCGTGTCTATGTAATTGTAAGGAGCAGCATCACATTGAAGTGATTCGCTACTTGATT
TTGTACCAATATAGAATATTTTACACTTAAGTTTGTTAAGAGTATCTGGTAACAACGTTA
AAGTTAAAAATAAAGTATTTTGTTTGAGAA
>NODE_39897_length_57_cov_10.543859
GTGCGCAGATGGCTGATGAGGCCGATCCTTACACGTTATGTCGGAGCCAAATTGTCGGGT
CCGTTTTGTCGGTGAACTGTTTGAAAA
>NODE_39901_length_49_cov_58.979591
CTCATATGCCACAGAATGCTCGAATATATTTATTGTTTGTGTACAATTACCAGGCAGCTC
AAGTAGACACTCAATGCCA
>NODE_39917_length_70_cov_2.928571
TTTTTTTTTTTTTTTTCATTTATATTTTTTTATTATTATTATTTTTACAAATTATTGAAT
AAGTCAAATAAGTTACAATAAGTTAATTAAATGTGAAGTC
>NODE_39919_length_67_cov_2.298507
AAGTACGAGTTCTGCAGAAACGGCCTGAAACTGTCCAAGAGACCCGAGGTTGATTGTGGC
GCTGGCTGGGCGAGCACCGACTGTACTGAAGACAACA
>NODE_39938_length_71_cov_2.169014
CGATGACAAAATAGCTGAAGAACAACCTCCAGACTTGAAGTTTGGTGATCACGATCGGTG
TCACGTTGATAAAGAGGGCTCCAACGCCCCACATCATGGTT
>NODE_39941_length_463_cov_3.758099
AAAAAACTGGCCAACATTCCTAAAATGGCGAGGGCTTCACAGGCCCTAACGCTGCTTGCC
AATGCATCATCCATACTCCCAAAGGTGTAACTGCCACAGGTGTAAGTTGGGCCATCATCT
TTACAAACTTTCCACAGACCAAAAGACCCAGAGTCACCATTTTGATTTAAGGCTGACCAG
CTTGGTGTGGCCAACCCAACAACATGTAGGAGAGCACCAACCCCGATGGTGCACANAAAT
GTTTGAAAGGTGTCTGGTTTTCTGGGTCTCAGTGGTAAAACTAAATTCCGACTGGTCGAA
CCACACCGGTTGGGTTGTTGTACATCCTCTCGTGGTTGGGGCTACCACGTGTGACGACGT
TCTCGTTCTTGCGATTGAAGAGGTCTGTCTCGGTAGCTACATAAGCCAATGGGTAATTTA
TTTGAACTAGGCATCCACTTTAAGTCGATGTGACATGGAAAACTATTCTATAATATGATG
ATCTCCGAAACAC
>NODE_39958_length_55_cov_27.454546
TCAGACTTCACTTGACCAGACAGGAAACAGGCGGCCAGCGTAATGAGAAGTACGGTATGC
ATCTTCCTGCATCAGTAAGTTTTCG
>NODE_40102_length_44_cov_27.318182
GCCTGTACTTGGATCTTTATAGCACTCTTGTCTTTGCTTTAATGCGGCTACATGCTTTTT
ATGAATAAGTTTTT
>NODE_40104_length_31_cov_18.483871
GCTCTTGTTGGCGAGGAATGTGCCACTGATGACGTATGCGGCCTCGGGGAGTGCTGTCAG
A
>NODE_40105_length_44_cov_73.795456
ACGTATGCGGCCTCGGGGAGTGCTGTCAGAAACTGTCAACCCACAGGGTTGTAAGCAGAG
GACTAGTGCAAGAC
>NODE_40138_length_156_cov_62.775642
ATGCTTTACCTGTGGCAAAGTTATTGGTAATAAATGGGAATCATATATTGGTCTGCTTCA
AGTTGAATACACAGAGGGTGATGCACTTGATGCCCTAGGGCTGAAGCGCTACTGCTGTCG
TCGTATGCTTTTATCTCATGTTGACTTGATCGAGAAACTTCTCAATTATGCTCCACTAGA
GAAGAG
>NODE_40139_length_31_cov_1.000000
AATGTAAAAAGTTATAAAACACTTTGTGTATATTTCAGAAAGTTAAATATTTCGTATTGA
T
>NODE_40141_length_31_cov_18.290323
AAGACATTACTAGCCCCACTTGCAATAGCAGAAAGCTCAGAGTTTACAGCAGCCCCAATA
C
>NODE_40242_length_69_cov_80.623192
ATCCAATCAGCTGAACAATCCAAGATGATTCAGATCAGCGCTGTGTTGGCAGTGGCCATG
GTAACCGTCGTCACAATGCTTCATTCGACGACTGCAATA
>NODE_40248_length_106_cov_103.877357
GTGAAGTACTTGCCTGCTCTACCGACAGTGTCTTCTCACATTTAGCATGGATCAATACAC
CTCGCAAACAAGGTGGTCTTGGTCCAATGAACATCCCCCTTATTGCCGACAAGAATGCAG
AAATCTCCAAGAAATA
>NODE_40312_length_40_cov_14.875000
GTAGCTTCCATGTTGTGCAAAGCACTACCTCATTTAGAATTAATGTGTCAGGACAATTAT
TTTTGGGACA
>NODE_40313_length_72_cov_4.027778
GAAAAATAAATGTTTTGTTTTATAGTAAGTAAAGTTCCCCTTTCAGACCATGCTGGCCTA
TAGGTTAAGTGAAGCAGCATTCACAAGTTTCTATAGCCACGG
>NODE_40314_length_107_cov_2.392523
CTTAATCTATGTCTTAATATTGCGTTTGATTTAGTAGTTTAAAGTTTAAACATATGGGAG
AGCAACCTGGAAAAAAACCCAATACACACAGTTATAAATGTTCTTTGCATGACCACACAT
GAGTTGGTGTATACTTT
>NODE_40315_length_109_cov_2.752294
GTCGATTTTTAACTTGCTCTTTGTCCTCTGTGAGCCACTAAACTTGGCTCTAAGGGATCT
ACAACCAAGGAGTTGACCCTAAGCGACACCAGACCTCTGTACACATCTGCCATCATGTGA
ACATGTATAATGACCCCAG
>NODE_40324_length_71_cov_2.535211
TTTGACTTTTAGCAAGATAACAATCTCTTAAGTCTGGATACACAGTTGACAAAGTGATTA
GATACCTCAGTCTTTTGGCAAAATTTTCTCTCATGCTTCTT
>NODE_40331_length_70_cov_3.785714
TTTTCTAAATATGTGCTGTTTGCGGCTCTCGCAGACACATTTTTTTTACTGACACCTGGC
GTAGAGAAATGCAAGATAGGAAGAGCGGTTCAGCAGGAAT
>NODE_40336_length_66_cov_32.106060
AAAATAGGGATAACAGGGTAATATTCACACTCCTCCAGTCTACAGTCCGACCACTTGTCA
ACCCACAGTTCTTACAAATCGACAATGTACAAAACT
>NODE_40337_length_86_cov_207.918610
GCTATGGCGATGCCCCCGTTCCCACCGCAAGCCCCGTTGCCGGCCAGTGTTATCTGACTA
TCGGTGGGTCGGTCACAGTTGGCAACGGACAGGAAGCAGGAGTTGCTGTAGGTCTT
>NODE_40340_length_55_cov_39.818180
TTTTTCAAATAGCTGTCATCATTAATTGCTTCTCGAACAGGAACAACTTTGCCATTATTG
TTAAGATCGGAAGAGCGGTTCAGCA
>NODE_40364_length_172_cov_16.058140
CCAACGGATACACACCCTCCAGCAATGAGCCTCATCCTCCTGTCCATTAACTGTACTATA
AGATCATCTATGAGCTAAACTCCTAGCTTTATTGTATGTTCAATTTACATCAAGCAGCAG
CAAAAAGAGAATTATTTATGCCAATGAAGTAGGATTTCTTGAGCTAACAAGTTTAAAGAT
GAGATTTATATTCCCCACTATC
>NODE_40375_length_61_cov_15.704918
TCAAGTATGTGTTAGATGCTGGAATGTTTAACGAGTCAGCTGGGGGGCGGGACACGGTCA
ACAGCCATCAAACAAGCTGTAGCCTTACATC
>NODE_40383_length_121_cov_6.892562
TGACAGTTCTTACCAGTTCTTTGGATTGTGGAGTTGTTTTGTTTACCCGACCTGATTATG
CCCTTGTGAGATTTATATTTATAAACATTTTACTGTGTGTGAAATTTATAATAGTGCCAT
AATGATCTACTTCCAATATCATTTGCGTGTG
>NODE_40392_length_31_cov_1.000000
AATCTGCAGGTTGATCCAGCTCTTGAGCTCTACGACGTCAGCATACACACCTGGTCTGTA
G
>NODE_40398_length_295_cov_28.061016
AGTTTGTATTTATTGAGTTTGTATTTATTGTGTTTATATTTATTGTGTTTGTATTTATTG
TGTTTGGGGTTGGTTGAACACATCAACCTCTCCGGTTGTTGGTGGGTTGTGGTTTCGGTT
TGGGTTTGGGTTTGATGTAACGGGGAGGGGATTTCTTAGGTGGGACGATGGGGACACGTC
GATTGGAGTTAGATTGGGATTTACTTCCTCCTTTAGATACTCCGGGTTTGGGGGTGGTGT
TTGCTGGCACCGGAACTGGATCAACCGGAAGTGGATTGGCTAATTTGCTGGAGTTGAAGC
CAGAATTTCCCACACACACGATTTT
>NODE_40407_length_80_cov_18.412500
AGGCTTTTAACATTCATGCAAATGTGTGAAAACCGAAAAGAAATGGACTTTAGCGTTATA
CAAGAGGAGATGCAGTTGGATAAAGATCAAGTTGAGGAGTTTGTCATTGA
>NODE_40408_length_31_cov_14.645162
TAAAGATCAAGTTGAGGAGTTTGTCATTGATGTTTTAAAAACTAAAGCAGTGAAAGCCAG
G
>NODE_40443_length_31_cov_52.419353
GCTTGTGACCTTATTCGGTTTTACTATATGCATATTCCAGTGCACTAGAAATGGTTCTCA
T
>NODE_40446_length_163_cov_46.773006
TCAATCACAAGTAGAAGATGAAGAATGGTCTCGGGTTCAAGATACGACCAACATCAAAAA
CCAGTATGGTAGCGATGGTAGTGATGACGGTGTAACGCTTGGAGAGAGGGACTTGATCGA
AGTTGAAACGTTGTACAAAAGATCTAACGGGACGGGTAGAGGAAGACGACTGTGTTATTA
TGTGAGAAGACAA
>NODE_40451_length_129_cov_14.093023
AGTTTCTGTATGGCCAGTCGGCTTGGTAGGCTATCTAAGATATGAGAGTCCTGTGGTCAA
AGATGGCAAGGTTGTTAGCTGGTTTACATACTGGAAACCCAACCGTCCATTTCCTATGGA
CATGGCAGGTTTTGCTGTTAACCTCAACCTAATCCACCA
>NODE_40453_length_35_cov_12.200000
CAACAACAGCAATAGTAGTAGCTGATCAGCCAGAGGCAAACAAATCAGCTACACAAGGGC
TTGTT
>NODE_40479_length_31_cov_5.354839
ATATACACAACAAAGAAGACAAACCCCAAGAAATCGCCAATGTTAACATTTCAGATGTGG
A
>NODE_40480_length_71_cov_1.056338
AAAACCCCTATTAATTCCTAGCTACGCCTCTGTCTTGAATCATTGTTGACCGCATTTAGA
TTTCGATAAGTTTTTGTTTAATTTCGAAAAGCTTCTTTCTC
>NODE_40538_length_71_cov_1.521127
CGAACAGATGCCTGAAAATGCTGAGCAGGAAGAGAAAAGATGGAGCAAGCGTACACAGCA
AATGCAGCAGATATTTGAACAGGCCTTCACTTTCTCAGACA
>NODE_40541_length_31_cov_243.225800
GCGTTGTACAGAGTGTTTCCTGGGCAGTCGGTGCCTCCGCCCATATCTCTGTGACCTCTG
A
>NODE_40574_length_31_cov_14.838710
TCTTAGGCTTATGATGTCAAAATGCTTGAGAGTCCTGAAGCAAGAGAAGATAACTTAAAA
C
>NODE_40579_length_31_cov_12.290322
CACTACCATCCTCATCAGCCAGATGAAAGAACAACAGATAGGAAGAGCGGTTCAGCAGGA
A
>NODE_40581_length_65_cov_1.969231
ATTTTGCTCCCAGTACGACTACTTCCTGGCCTCTGAGTCCATCATCAAGACCATCCCCAA
GGTCGTCGGCCCCCACATGAACCGTGCGGGTAAGT
>NODE_40587_length_47_cov_21.212767
GTGCAAGAAACTCCAAACTTGAGCAACTTGGTCTGAAGAAACCGACAGCCTACAAGAGAT
CGGAAGAGCGGTTCAGC
>NODE_40591_length_75_cov_68.093330
TGCTGCCAGCCAGACCAACGAAGGCGGGTTGCTGACTGTGCTCATGTAGCGGACAACACG
TTGCTGGGCGTCGGCCGAAGATTACCCTGTTATCCCTATTTTTTT
>NODE_40592_length_98_cov_154.551025
AGTGTGATTCAGGTTTTGTCAGATATCCCCTGGGAATGTGCCTTCGGGTTCCAGCCCATG
GCCTCCGAATGCTATCTTCTCGTCCGGGAGCCGGTCACATTCTTCGAGGCGAGAAGCGCC
TGTGCAAC
>NODE_40609_length_37_cov_26.486486
TGAGCATTCAGCTGGACATAGCACATCTGGTCTTGCACATAGCACTCGGCACAAACTCTC
GATGCTC
>NODE_40610_length_71_cov_16.422535
CATAGCACTCGGCACAAACTCTCGATGCTCTGCTCATAGGGGGGCGGGGCCAGTACGTGC
TGAGCACCCTGATGAGGAAGTAAACACTGTCCTACTGCTAT
>NODE_40612_length_31_cov_37.387096
AAACCTTTAGGCCCGTCATTTCAACTCGAATTTAGACACTTTTATCAGTAAACAGACATG
A
>NODE_40613_length_113_cov_19.486725
GTTTTGGTCAGAACACCCCTTCTTGATGACTCTGTTGCCACCAGAGCTATCATCCACTGT
TAGGGAACAGAAGCCTCCGGGACACGTGACCTCCATCTCATTATCTCTGCAAGCCCCGTC
ACACTTGGCACACGAGAGAGTTC
>NODE_40614_length_32_cov_47.437500
CCCCGTCACACTTGGCACACGAGAGAGTTCTATGGAATTTGTGCTGCAGTAATTCATTGA
TT
>NODE_40622_length_61_cov_194.426224
TCCAGACTGGGACGTTATCTGTTTTGTATCTCTAGTTGTATCTTTGGCTGCTTGCGTCTT
CTCTGCTTGTTCCTGCATCATGGCACTTCGT
>NODE_40673_length_235_cov_9.663830
TTTTTTTTGAATAAGGATTCAAGTAAATCATCAATAGAAGAATCCGATAATCTTTCCTCC
GATGTGTCTTTCTCTGCATTCTTCGTGGGTGAAGATTCCTTTAGTGGTTGAGAGGACGAG
ATGGCCGAACTGTCTTGAAGGGAGGATGTTGTTGGTCCACTTTTCAAAATCGGGGAGGAG
AATATCGTATCTGGGAGAGATGACTCCACATTTGTTGATTCTTCCAACGAGTTCGATGAC
AATCTTCTTGCTTCTGTGATCATCA
>NODE_40674_length_198_cov_14.055555
GGGTAATATTAGCGATGGAGAAACTCAACATTCTGATCGGCTTTTTGTTCGCCATGCTCC
TGTCCGCCGTGCAGAGCAAGCAGACTTTGAAGCCCGAAATGGCTGACTTCGGTNGTCAAT
GGTCGTTCGGGGAGGATTATGACCTTGTCTAACTTTTTGAGTCATTTCGGACCAGTGACG
TCTGTAATCTCTGTTTTGTTCCGGGGGTTTGTTCTAACTGGCCACTGC
>NODE_40675_length_132_cov_1.613636
GGAACAGGCGAATAAACCAGGGATTGTCAGCAGCTAGTGTTGACCTATTATGATTGCACA
GGAGAGCACCACATTCTCCTGTATAAAGCATTGTAGTTTCATTTTGTGTATTTTAAGAAG
CCATTCTCCAACATATTTGTCACATCATATTAAAAAAGGAAA
>NODE_40676_length_235_cov_1.434043
AGGCATCATAAATATTTATCAATTACCAGTTGGGGGGAGGGGGGGAGTGTCAAAACTGTA
TGTACGCGTGGGGGCATTAAAAAATAAGGCATGGACAGGGGCGAGTAAAAAATTGGACAA
ATTTACATGCATTGTTTATGGATGGTCCCTAAACAAAAAAGTTTTCCTTTTTTAATATGA
TGTGACAAATATGTTGGAGAATGGCTTCTTAAAATACACAAAATGAAACTACAATGCTTT
ATACAGGAGAATGTGGTGCTCTCCT
>NODE_40677_length_142_cov_6.845070
CGATTCAACCTCTGACCTCACCACGGCCAGAAGGCCATCCAACATATCTGTGACTTCATC
AACAGTGAAAGTTTCATCTGTCAATCTGCTGTCTTTTAATTCTTCAAAGCAAACATCAAC
AGCTCTTAGTCTTTGAGCTCGTTGGTAGCGAGCAAATCGAATATAATTTATC
>NODE_40686_length_46_cov_235.304352
GGTGCTAGAGTCTTTGGCGCTTTGAAAGGAGCTGCTGATGGTGGCATTGAAATTCCACAC
AGCACCCGTCGATTCC
>NODE_40699_length_77_cov_1.753247
CGCTTGTCTGTGTCTGGCCTGTGGTCTCACCGCCTAGACATGGGTCAAGATTTCTCAATG
GAGGACCTGAAACCTGGGGCTAAATTTGACGAGGCCTTGGACCAGAT
>NODE_40749_length_155_cov_11.993548
CATACATAACCCGGCGTTATGCCAGAGCCACGAACCAAATGAACATTGGCGATGCAAGTG
CTGGAGCCTGCGTCCTACGCCTCGATCTCCGCTGCTGTCTCCATTTACTGCCTAAATTTT
AGATGCCTTCTTTGAAAAGGAAGGTTCTCCTTATGCATACATGTATGAGAATTTCCAAAT
AAAAC
>NODE_40750_length_41_cov_152.560974
CTTTCAATGGCCGAATGCCTAAGGGCCAAATAGCTGTCCGTGACGTCACGCTTCCACCCG
AAAATCCACTT
>NODE_40773_length_75_cov_41.759998
CAGAAGGGGTTGGGTAGGTAGCATGTTTGGGTAAATCAGGTACAATTGGACTTGGGAGCA
GCGGCAACACATATTTGAACTCATCATATGACACTTCAAAGTCTG
>NODE_40774_length_68_cov_165.220581
CTTAAAACCAATTAATTACAGCCAGTGATACCTGAAATTCTTAAACCCAAACTGTATGGC
ACTCTCTCCCATGCAACTCGGTCCCCCGGCAGAGATCT
>NODE_40777_length_61_cov_175.344269
AGGTGGTACAGGGCATTTGTAACATGAATTTATGCCCGTTACCATGTCCAGTATGGCTAA
CTCTGAAAACTGTTGAAGTAGCCTCGAAGGG
>NODE_40794_length_69_cov_38.318840
ATAAATGTGGGCCCAATGTGCATCAGGTCAGCTACAGAGAATGTGTGGCGTACCAGTTAT
TGGGTTACATTATAAATGTGGGCCCAATGTGCATCAGGT
>NODE_40801_length_70_cov_43.342857
TATGTATCGATTATTAGAGGTTGATAACCGGGTTAGTGTACCTTTTGAGGTAAATACAAA
TATTATTACAACCTCTGCAGATGTTCTTCATGCATTTGCG
>NODE_40803_length_81_cov_46.037037
GCAGCTAATATTTGTATGCGTACTACCGCTCCAAGACTATGCGCTGTTTATCTAGTTCGG
AACTTTAATTCCAAAGATAGATCACAGCTTTTGAAGTTACATAAATCGCCA
>NODE_40805_length_44_cov_238.590912
CACGTGCAGGTTGGGCAATCGTTGGTGTCGTTCTGGTATCCGGCTAGACACTTGTTGCCA
CATTTGAGCTTGTG
>NODE_40806_length_79_cov_68.392403
AGCTGTTCTCGTCTCGGCTCGAGAGTCACCGCCAGCCGCTGTCCTCTGTCCTAAAATGGA
ATGTCCTCAGGTGGACTGCCCCGGTGGCTTCACCGTTGTCCAGGACAGC
>NODE_40807_length_270_cov_5.292593
GAAAGCCGCTGCATTAGCAGCTACTAGTCAACCAGAATCGAAACCACGTAAAGAGAAACC
TCGTATCCCACCTCCACCATCACAACCACCACCGGATCGTACTCTTCACGAACAGCATAT
AGCAATGATGAATTCCGAGGAAGTGNGTTCTTAATGGTTATGCACTAGCATGTGCAGCAT
AAGTTAGCCACTAACGTCGTGTTTGCTGTTACTAGCCATGTGGACAAGGTTACTACTAGG
GCCTTCAAGGTGGTTTAGGTTGTGAAAAACAATCATTAAATGGCTTACTTTGTTGAGCCC
>NODE_40859_length_77_cov_29.883118
TGTGCAGGGGTCAATCTCATATCTCTCACCAGGCTTATAACGACGACCATTGTAGATACA
GCTCTCTGACAGCATCAGGCAGATACACACGAAAAGGGATGTAACCA
>NODE_40907_length_75_cov_2.293333
CTGAATCAGCAGCAGTGTAATGGCAAGTTCCTCCAGTTCCCTTATAGGCGTATTTAGCTT
CAGTGGTAATTCCATTATCTTTAACATAGAAGAATGAAAGATTCA
>NODE_40909_length_78_cov_2.679487
TCAAGGCCAATGCGGATCATGCTGGGCTTTCTCAACCACTGGATCCCTCGAAGGTGTCTA
CAACATCACCAAAAAAGCTCAAATCAGTTTCTCAGAGCAACAACTTGT
>NODE_40911_length_116_cov_75.698273
CCACAGCCAGATGTTCTTAAGGTGGAAAAGTGGTTTGGCAAACACAAAGAGATTGCTGCT
GTGAGAACGGTTATTGCTCATGTTGAAAACATGATCAAAGGGGTCACTGTGGGCTTTCTT
TACAAAATGAGAGCTGTCTATGCTCA
>NODE_40912_length_40_cov_81.574997
AACTCATCCTTGTTACCAGATGCCTTAAAAGAAACACCTTTCAACATATCCACGTGACGT
GTGAACTTTT
>NODE_40922_length_136_cov_52.625000
GCACCCAACACATACGTCACAGATGCTTGAATCTCTGAGAGCCTTTGGTAGGTAGAAGAC
AGTACTCTGGTCATCTGGAGAGTAGTAGGAAAATGTCTTGACATAAGAGTTTTGTGACTT
GGCCACTTTGGATTCACGAACCATTCTCAAACTGTAGCATAATGAA
>NODE_40923_length_104_cov_52.653847
AAAAAAAGAAACTGGAATGGTTGTACAGGAGATAAGCATTCCTTCTGGATTCCAACCAGA
TCTCTCCACACTTGGAAATGTTGCTGGTTTGAAGAGGTCTGAGAGGAAAGGAGGAGTCGT
GGCCATATATTTTG
>NODE_40975_length_115_cov_20.026087
AGTGAGAGCATCGCTCCACTTGGAACAACGGCTCCATGTATCAAAGCATTCACCCAAAAA
AGCATCCGCTGGTTGCGTCATCAGTGCCACCACTGCAAGAACCAGGCAGACCACCGAGAG
CTTCAGTACTGGATGCATGGTCAGA
>NODE_41004_length_110_cov_1.518182
TAGATCTGAGAGAAGTAAACAGCTTACTTGGAGCCTCACTTTGGTTTGGAATCTGAGTGT
AGGCATTTCCTTGAGAGTTTAAATTTGGTGGAGTCGGAGAGTAAGACATGGAATGATGAG
GATTGGACTGAAAAGACATT
>NODE_41040_length_31_cov_112.419357
TCGCAGAAGTACACGAGCCCCGCGTTAGCGTCCACCGCTATGCCATTGGGCAGATCCAGG
T
>NODE_41087_length_114_cov_1.254386
GTCGAAAGCTTAATACCCGACTACATGACAATATTTACAGATTGGTTATTCCAAGTCATC
AATTTACTTTTTTGAAATTTACATTACGTCAACAAATTGATTTAAAATTATTATTTTATT
ACAACTTACGAGAAATCCATTTTT
>NODE_41088_length_500_cov_3.458000
TAGAAATGCAATAAATCTATCATCCGGTGACACAACAAACTTGGACATCTGGATAATATC
CAGACCTTTAACCTTTGGCCTGTATGTGATTCCTTTACTCCCTTCCATGTCGTAGATGTA
AAAAGTTTTGCGTTTGGAGCCAATGATGATCTCACTGCCACCCCTGCTAANAAAACGACG
GTAGTTGTCGTTTGTTGGCTTGACATAACAGTCCGGGAGGACATTCATTGCGACACCGAA
ACCCCACTTTAAGATGTGAAGCGTCTGACCGGAACGACCCTAGAAGAAACAAAGGTAGAC
AATGAGAGAATTTAAGATCACTTGAACTCCCATTCGAGTCACTACGGGGATTTGGTTATA
CCGAAACACGAAAGTTATAGAGGAGTAGCGACAGTAGACTAAAAAGTAGTAGTTTAAAAC
GTCGGGTCCTTCCACAATAAAAGAGTTTGAAACGTCGAAAAAGTAGTAGACGTAGACTGG
TAAAGAAATGACCGACAAGAAATGGCCTGGCAGCGAAAGAAAAAGAAAGA
>NODE_41145_length_119_cov_43.025211
ACAAGAGCTGTTCCTGTGGTCAAATTTTGAGGTCTTCCACCACATGGTCCTGTTTTCAGA
TAGCAGTCACCAGCACCTACGGCATTTATGTTGTTGGACGGTCCTCTTTGCGGTGGAGTG
ACCTCAAAATTTGACCACAGGAACAGCTC
>NODE_41183_length_56_cov_89.589287
ACCAGCCATTGCCAACTTTTCGACAAAGTCGCATCGGCTCCAGTAACTCGAACGACGAAA
AACCCTCAAGCCAGACCGAAAGAGGA
>NODE_41186_length_127_cov_9.889764
CAGGATACACAAAGATTAAAATTTCAAATCTCAAATTTTTCATCAAACATTTGTACATTA
ATTCCAGGCATGACTTAACGATCAATTGAGTCATTTTGGTGATGTCTAGCTTTACTTGAT
CCATCATCCTACAATAGAAAGTTGAGTCAAACATCGG
>NODE_41220_length_42_cov_62.738094
TCTCTGCCTTCCTCCCAGAACATCCACATCGCTTGTTCTATGCTGTACATAGAGGCATAG
CTGTAGTACAAA
>NODE_41222_length_152_cov_3.019737
GGGTAATGCACCAAATGCATTCATGTATCTCAGCTGTGTGACGGTGTCAAGAACTGTGCG
AATGGTCAGGACGAAAAAAAGTGCAGATTCCAATGTGCCGACGGTATTTTCCACATCCAC
TTTTCATCGGTGTGCAACAACAAACGTGACTGTTGGGACGGAAGTGACGAATTGACGTGG
CC
>NODE_41223_length_31_cov_7.548387
TGTAAGTAACCCTGACGTCGTATCGCAAACGGTTCATGCCAGCATAGATTACTCCGAACA
T
>NODE_41224_length_261_cov_3.482759
GTTCATGCCAGCATAGATTACTCCGAACATGATGGATGTCAAATTAAAGTAGTTGACAGT
CCAGGTCTCGGAGATACACGTTTGGACGTCGTTGCAGATATCAAACAGTTTATTGAAGCT
GTTAAATATGCTATANGCGTCGAGCTATAAGTTTTCTTCTTCATCTTTCACACTTATTTG
ATTTTTTCTAAAACCCCAGTCTAAAATAATTCGTGAAACCTTAGAACAATTACTGTCCAC
CGCTATCAAAACTTTCACTAGCTCTCTATTTTTTTTCTTTATATTGTAAAC
>NODE_41250_length_36_cov_223.833328
GAATCAGGGGCGTAAGTAAACCAATATCGTTTGTGCGAAGTGCTCCAGCGGGTAAGAGCA
ACAGAG
>NODE_41251_length_153_cov_67.137253
CGAAGTGCTCCAGCGGTAAGAGCAACAGAGACAATGCTGTCAAAAGCGGTATAAAACCAG
AAGAAATCTCTGGATTTTGCTATCATGGCTGCCATCTGTCTTTCTCTCATTTCATTTTGC
ATGGTAAGTTGACGCTCCAGCTGCAGTTGTTGCACCTTGAGCATGAATTCCTGATTTTTT
TTT
>NODE_41252_length_38_cov_22.631578
GTGACCACAGCTGGTGTTCCTTTGCCGTACTTTTGTATACATTTCAATGCCAGCATGGCC
TCTGCCAG
>NODE_41276_length_112_cov_3.312500
GAGTCATCTATCAAAATGGTTTCATGATTGTTACTACCAGCGTCCAATACAAGAACATAG
CATGAATAACTGTGGCAAGATACAAACCTGAGCAAGTAACATCAAAATATTCTGGGAAAG
ATCGGAAGAGCGTCGTGTAGGG
>NODE_41283_length_41_cov_4.390244
ATGTTTTATATCTTGGAAAAACGTCTTTAAGAAGAATGTCTAGACTTCTGGGATTCTTGA
TGAAAGTTTCA
>NODE_41285_length_43_cov_6.279070
GGGATTCTTGATGAAAGTTTCATAGCACATTGTCCAATATAGGTTTTCCTCAACAAGGCA
TCTAAAAGCCCTT
>NODE_41294_length_368_cov_3.714674
TTCGAAAAAGAACAAACATACACGGAAAAAACGTGGTCATAATTTTACATTAACCGCGAC
ATTCTCATCGGTCAAATCAAAAGATTACGATGCTTTAGTGGTTCCCGGTGGACGTGCACC
TGAATACATTCGATTGGACAAACGCGTTCGTGAACTCGTACGAGAATTCGATAATGCGAA
AAAACCCATTGCAAGTATTTGTCATGGCNCAGTGTCCTATGTTTCGATAACCTGGACTAG
AGCTTAATCGGCCACGTTTTATACACCTTCATCTTCGATGACTTCACCAACACCTACCAG
TATAGCATTGTAGTGGTCGAACCGGACCAGTAGGATTTACCGAGCGACTCAAAGAGTTTG
AAAACCCGTGTTGCTAATTAGGTATTTGTAAAGAAAAT
>NODE_41295_length_1073_cov_11.647717
CTTATCACACTTGGTTTTGTAACTTTGATCAAATGCCCATGTTAACAATTATTTTGAAAT
TTCAATCAAAACCTTTGGCTAAAGAAATAGTTTTGAGATGGGTAACAGCTCCTCCGTCAT
AGATCTCGGCATTGAGCAAATCTCCTCTATGATGCTGTCAGTCAGATCCAAGATCCAACC
ACTGACATCTGGGGAGAGATGCCCGTCATCATCATCTGACATGTCCGAGAGGTAGCTCTT
GAGCGTTGGAAAGTTTTCCTCCATATTGCTTTTGTGCCTGCAGAGTATGCTCTCCCCTGA
TGGTAAGCTGTTGATTCCTTGATATAACACAGCCAGCTGATGTGCCAGGTACTTGGGTTT
GACCTGATGGGTCACATCATTCTGGATTTGTCTGGACATGGAAAGGACATGATGCATGGT
CGTTAGCTGTGACAGGTAATCATCAACATCTGTTGTTTTGTGTTTGTTGAGTGCATCGTC
ATGTCCTGCCATGTAGGCTGANAGTGTAGTAAGACCTAAACAGACCTGTACCTTTCCTGT
ACTACGTACCAGCAATCGACACTGTCCATTAGTAGTTGTAGACAACAAAACACAAACAAC
TCACGTAGCAGTACAGGACGGTACATCCGACTGTGTGCTCCCTTCTCGACTAAGTCCGGT
CTCAGTACCCCCTTTTAGAGACTCGACAAGTTAACCGACCTGAACATATTAAATTTGTTA
CGGACAACCTCTAAAGGTTTGTGGTATAACCGAACTGATAACGCTTCTCTCGACCTAAAG
AACAGGAGACCAAATACTGTCATTTCCGAAACAAACGTGTTCCACAGGTCAACTTTTGAC
TCGTAATAGTGTAGATCGACTCACAGACTACGACTTCACTCCGCGAGAACTTCACCCCGT
ACTGCTTCTTGTAGTTGAAATTTATGACCCAGTATTACACGTCCATATTGTTGTCCAACC
GTTGTTCTTCGCCGGTATCAACAAANCACACGAGGGAAGAGCTGATTCAGGCCAGAGTCA
TGGGGGAAAATCTCTGAGCTGTTCAATTGGCTGGACTTGTATAATTTAAACAATGCCTGT
TGGAGATTTCCAAACACCATATT
>NODE_41296_length_38_cov_97.973686
TGTGCCTCCTCTGTCAGAAGTGGTAGACCTGTCGTCGGATCGTCAGTAAGTTGCCCAGGT
CTGACCGA
>NODE_41298_length_31_cov_62.870968
ACAAGCATCTTCCTTTCACCTGGCGTTGGATTTGGACTCCAACCTTTCTACGCCACATCA
T
>NODE_41331_length_47_cov_4.574468
GGGAGATTAAAGCTAAGTTTGGAGGTTATATTGGTTGGACTACCATCTTCAATGACGTCA
TGTCAAAACTACACACA
>NODE_41332_length_31_cov_3.451613
TTCAATGACGTCATGTCAAAACTACACACAGGCTCTGAACGTAACGAGGTCAAGATCGAC
A
>NODE_41333_length_116_cov_1.568966
CGACAGGTTAACCCCTTCGCAAAATCCTACATGCAAATGCACGAAATTATCACTCATAAT
AACCCTGTTGCTGCTGTACGAATGGTGTTCATGGAAAATCCAACTCTGGATATGAGAAGG
TATAACGCGCCATCCTGTCAAACCGA
>NODE_41346_length_345_cov_2.542029
CTACTGGACCTCTTTCCTGGAAAGACCGCCTCACTACTGAGGACTACGAAGAACTTAAAA
ACACTTTTAATGTCTTTGACGAAGACGGAAGTGGCACAATTGATCCCTCTGAGATCAACA
AAGTTTTGGAGTAGCTCGGTCTTGACAAGCGAAACCCCTTCATCCTTTCCTTGATTCACG
GACTGAGAGACCAGAACAAGCCTGTTAACTTCGAAGAGTTCCTCAATATCATCTGCTCCC
GCGTTGGCGAGACTAAGACCAAGGATGGTATTAGAAAAATCTTCTCCCTTTTCGACAAGG
ACGAAAACGGAACAGTTGACTTCGAAGAGTTCAAGATCGTTGCCAAGCAACTTCACGAGA
ATCTTACCGATGACG
>NODE_41347_length_348_cov_7.132184
GCTTAAAGAAATGGACGGAAAACTGGTATCTATGGAGCAGAAACTTTTAGATCTTTACTC
AAAATTGAACGAAGCCCAGAACACGCCGGCCCCTTCCCTTGACATCAATTCGACCCATTG
CACGCCAACACCTTGCTGTGTACAAACTAACTTGACAGAGTTATGCCCCTCGAGAGATTC
CTCCGACCAAACCCGCTTTTATCCTTATAACTTGACCTACAGCGGCCACGGGTACCACAT
CCTCCGCTCATCTTTGTGGGGAGTCAACGACGCCGTGGAGCTGTGNGCGATTAGTTCGTC
TCATAGTCCGGCACTGCGTTAAAAACTTGTCAGTCTCATTTCACCGCCGGCATCGATACC
GGCCCTCCATGTCAGTAC
>NODE_41348_length_31_cov_10.451612
ACCTTGCTGTGTACAAACTAACTTGACAGAGTTATGCCCCTCGAGAGATTCCTCCGACCA
A
>NODE_41365_length_31_cov_18.193548
CCACACGGCGACCTGTCCACCTCTTGATTAGCAAACACACACAGGTTGGTGGAGGATTCG
T
>NODE_41367_length_31_cov_10.032258
AAATTTGGGCCTTAATTTAGAGACATCATCACTGGCAGACATAACCAAAGCTGCGACTGC
T
>NODE_41394_length_80_cov_4.400000
GGAGTGACACAATGCGCGACACGATGTGCGTCGTAATCATCATATGAAATTTCATCTCCA
CTGCTTTCAAAGCCAGAATTAGCCTTTCTATCCGAGTAAGCCTGTTGACT
>NODE_41409_length_134_cov_76.701492
ACATCTATCAACCATGAAGTGCTGTCTGATCGCCGTGCTGGCTATCGCCATTGTCCTTTC
CGCCACATCTGAGGCCGGCTACGTTCAGCCAAATGCTGGCGGCGGCAACAAAGGCTACGG
TGGAAGTGGCGGAAACAAGGGTTACGGTGGAAGTGGCGGAAACA
>NODE_41433_length_102_cov_91.245094
CAATCCTTACCACAGAGGTAACACGCCCTGATGAATCATTGGGTGAGAATTCAAAAACCG
TTGATTCAGCGCAAGTACAGGGCGTGGCAGGCACGGACAATGAACTTGATGAAAATATCT
CTAACACAGAGG
>NODE_41457_length_103_cov_1.980582
GTTTTGTGATATCTAGTGATGTCTATAGAAGCATAGTGATGTCTATAGGCATCTATTGAT
GCCTATAGAAGCATAGTGATGTCTCGTGGTGTCTGTCTAGAGATCCTAGTGATGGCAAGT
TGTATCTAGAGAT
>NODE_41459_length_55_cov_19.363636
TCTAGAGATGTATAGTGATGACTAGTGATTTCTAATGACGTCTAGTGATGAACAGTGATG
TGTATACAAGTCTGGCAATGTCTTG
>NODE_41462_length_54_cov_68.314812
GTCACACTCCCAGCTGTGGCTGATGCATGCCCCGTTACCACACTTAAAGTCTCCAATTCG
GCAACTTCCGCCACAATCCTTTTC
>NODE_41528_length_199_cov_7.854271
CACCTCTGCAGTTGCTTTTTTATCACTGGGTGTTGACTTCTCATCATCATAGTCAAGAGG
TATCAGTTTTCTTTTTTTAGGTTCCAAGTTGTCATCATCATCTTGATTAAAAACTTCTCC
AATAGTAAATTTTTTTCTTTTACCATCTAAGGTTAAAGTTGTGCCAGGTAAACTCGATGA
GTCTGGGCTTGCAACAGGAGCTGCTCGTATCTTATTAGAAGCAGAACTA
>NODE_41529_length_31_cov_16.161291
GCTGCTCGTATCTTATTAGAAGCAGAACTAGTATCTGCCTCACGAGACCTTGATGGCAAA
T
>NODE_41530_length_528_cov_8.087121
AAAAATAGGGATAACAGGGTAATTAAAAGGAAACTGTTTGATGAAGGCCATCCAGATGCT
GAAACTGAAGTTGCAAGGATGGAGCGAGAAAAAGAGGAACATCTTCAGCCTCGTCTACAC
TTGCAGGAAATTAAACAGTTGCAGCCAACACATGCCGTAGTTGAATCTGATTCGGAGGCA
GAGCCCATTCCAGAACCCGAAAAAAATATCGTTGAATCTCCTAAGCCATCACGAATTCAT
CATCAGCAACCAATCTTACCTGTTACTGCAATCCCAGAACTCAAACGTTCACCCTCACTG
TCAACATCTCCAATATCGACTGACTCTCGTATCAGTGCACCTGGGCTGTTCATGGATGAA
TCATCCCAATCATCTTTACCTGGGGCTCATTTGCCATCAAGGTCTCGTGAGGCAGATACT
AGTTCTGCTTCTAATAAGATACGAGCAGCTCCTGTTGCAAGCCCAGACTCATCGAGTTTA
CCTGGCACAACTTTAACCTTAGATGGTAAAAGAAAAAAATTTACTATTGGAGAAGTTTTT
AATCAAGATGATGATGAC
>NODE_41558_length_31_cov_30.838709
GAGCAGGTCACCAAGCAGGTCAGACACCTCATCAGGTATGGTATATACACCTTTACCAAT
G
>NODE_41560_length_31_cov_14.612904
TGGTATATACACCTTTACCAATGTTCTCAAAAAGTTTATAAATGTTGTCACCTTCAAATG
G
>NODE_41567_length_249_cov_34.502007
GCTCGGGGCCTGTCGTGCCTTGCCTGGAACTGGTCGTAGTTAAAACAGAACATGGCCATG
ACGATGAACACCACGCCCCCTGCGGCTAGTCCCGTCTTCATGTTCGAGGAATACTTCTCC
AGGAGGTCGCCGAAGTAGGGTCCGTTGACGTTGACGCCCAGGCGGACGGTGGCGTGCACA
GAGAAGGGGTGGGTGAGCACCAGGCAGTGGTACCAGCCGAAGTCGGGTTTGTCTATGGCG
TTGATGACGAGTGTTGAGCCGTTGTTATGGAAACTGTAA
>NODE_41568_length_133_cov_68.924812
TATTGCGTGATAACATCCAAGGTATCACCAAGCCTGCCATTCGTCGTCTTGCACGCAGAG
GTGGTGTGAAACGTATCTCCGGTCTCATCTATGAGGAAACCAGGGGCGTCCTGAAGGTTT
TCCTTGAAAATGTCATCCGAGATAGATCGGAAGAGCGTCGTGT
>NODE_41583_length_144_cov_16.902779
TCTCTTCTAGTAACTTCTGCTTGGCCTCTTTCTTACTCCTCCCCTTCCCACTGTGTGATG
ACCTCACGTGCTTGTGGACATCCATGCTCATGAAGTCGTATTCGTCCATGTTGTTGTCGA
TGTAGTAGGTCAAGGCGGACATCTTCAATATTACTGTTCGAGCTGGTAGAAGTC
>NODE_41663_length_199_cov_5.969849
CTACATTTTGAACTACAAAGAAATTAAGGAAGAAAATACAAGTATCAACATTTTTCAAGG
CCGAGATTCTTGCTCTCATGATCTGTGGATGACAAGAGAATACACCCCCAAGGAAGGCGC
TGAGGCAGATCAAATAGGAATGCTTTATGATCTGAAACCTTTTACTACTTATGCTGTTTA
CATCCAGGCATATACAGTTAGTACTGCAGATCGGAAGAGCGTCGTGTAG
>NODE_41685_length_164_cov_21.975609
[truncated: 34,657,289 more chars]
