# Supplementary material for: Short read Illumina data for the de novo assembly of a non-model snail species transcriptome (Radix balthica, Basommatophora, Pulmonata), and a comparison of assembler performance
Source: BMC Genomics. 2011 Jun 16;12:317. doi: 10.1186/1471-2164-12-317 (PMC3128070; doi:10.1186/1471-2164-12-317)
Supplement: Additional file 8 — OASESkmer-21 assembly contigs. [file 1471-2164-12-317-S8.FAS]

>Locus_52482_103
GTTGCGAGACACTAGATGTGAGCACATTTAGAGCATTGACTTGGAAACTGTCGTTTAGTAGTAAGTTGTGGAGCAGCACACGACGTGATGACGTAGACCGCAC
>Locus_52481_72
GGTGCACTGGATTACAAATATGGGTTGGTACTCAAATGTAATGGGGTCACGATCCGCCTAGGTCGTCTCGCC
>Locus_52480_130
TGGTGAACATCGGCCGGGTTGATACAACAGTTATTCTAATGTTCGCCATGACTATGCCATAGACGACAGCATTCAGAGGGCGGACTACCTTTCGAATTCTGTCTTGGAGGACACCTACGAGGCCGCTACT
>Locus_52479_118
TCACGGATGTTTAAATACACGAGGGTTCTAACCCAGCTGTCTGCAGTATGTAAGCTGCGGGTCATGAAATTCAAATCCAACAATTTATGAGTCTAGCACACAAAATCTTGTTTGTTGA
>Locus_52478_79
GGTGCGGTTTCTTCTGTATAGTCTGGTCAAAATGGACATTGAGTTGGCGGAGCAGGTGGCCATACCCAACATGCTAGAA
>Locus_52477_81
TGTTTACAGTAACATGGTGCACTAACACATGTAACTTTGATGGAGAGTGCCCGGATGGAAAATGTGACATTGGATGGTTTG
>Locus_52476_89
CCCAGATTGAAAAACACTGTTGTGACGAGGGCGGAGGAGAAAAGTCTGCCAAAATTGCGTGAAGCACACCACGCAGGTCGTATTCCAAA
>Locus_52475_75
AAAAAAGTTGTACAAATTTCATGCTGGAAGATTAAGATTTAAACATAAAGGAAAGGCAGGGAATGTAACAGAATT
>Locus_52474_110
TATTACTAGTCTTATAACTACGTGGCCCGTGAATGATAAATGGAAGAAGAAGAAAAATCTGAAACGCAGGCGGGAAAACCCGTTTTTGGTGCGTACATTTTTTGTGGAAG
>Locus_52473_112
AATTAATGTTAAAGTAATCCTTATCGAGGCCCATACCGTGCAAAAGCTTCCCTCCTCGAAATCGATACCATCTATGCCCTCTCCTAGCATGTCGCCAAAGTGAAAAAAAAAA
>Locus_52472_101
TTGAGCCGTAAAGGACCGTTACAGATTCTGGTCATTCTGGAGTTTGATGTTCAGTAGCTGCAATTGCTTCATATTTAACAAGGAAGCAACATGGATTCTGA
>Locus_52471_138
GTTGTAACATGTAGAGGAGGGTCAGTTCAGGCCCCTGTCTCCACTGGTTGGCCTCAACATTGTAAATCTCACAGGAGCGCAAGGCATCTCGACGGATCACATTAGTGGAATGGGAGTAGATCTGCCCCCCAGCCACAA
>Locus_52470_197
GTAAAGTGTGGGTGTGCCATAGCCCAAACAAGTGGCGTTGGGGAAATGGGTCCAGAGAGAACCAGTTGGCCAGCTGGACCGGACCCAATATGCGTACACAACTTGTACATGCAAGGGTAGCAGCGGGGCGTATGTTTTTATTCTAGGAAGCCTGGGATGGTACAAAGGCCACATTCACAGAGGCGGGGGGGGAGGGG
>Locus_52469_72
AGTCATAGCTAGAACTTGAAGTGGGGGTTTCTGAATTGAACCTTAGCAAGGGGAGCATGACGGCCAGGGTCG
>Locus_52468_89
GCGCCAAAACGAGAAGCGTGGCATCGATCCATGAGTTGTAGACGTCGACGGCTTCGCTCAGATAATGAACCGACGTTGAGTATGTCTCG
>Locus_52467_132
TTTTTTGTTGAATTTAATTACTGTTGTTCCTTTTTAAGTTGAGTCAGAGAGGAATAGTTCAATAGTTCAAAGAAAGTTTAAACGTTACATGAATGGTATATTGCGTTATGTGAATGTTATGTTACGTTACGT
>Locus_52466_79
TAAGTAACACTTTATGCGTAAGACTTTTATAACATTCAGAGTGTCGAGGGTAAGGGAGGATTCATTGTGAAATACGCAT
>Locus_52465_98
TTTATAAATACACCTTGAAACATTTAAAGTTACTCGTTGTGATGTGGCGTCACATTCCTTAAACATCCCCCTCCTACTCCTCGTCACATCGCCACAAA
>Locus_52464_109
ATTTTTTTATTATTTTATTTGAAGAACGTTATTGCTGCTGTTCATAACTGACATTATTATTCTTGCCGGCTAAAGCTCAACTATTTACATTATGGCAGAGCGCGTACTT
>Locus_52463_105
AACCCCCTCCTCCCAACCCGGGCAAATGTAAATGTAATTGGAGTTTTGAGTTGCATATAATTGCAAGGCAAACTGTAGTAGAAGTAGCAGCTAACTGAAACAAAA
>Locus_52462_383
AATAATACAGATGGCCAAAACACTTGATTCGTGCCATAAATACCTCAACTGTTTGTCAAAACATGTAAAGAACAAACTTGGTCACATATCAAACAACAAATAGCCTTTGATGTTCATGATGAACACTTGAAGACTGCTGCATTGATTTATACTGACAATGAAGCTATATGTGAACCATAGAAAAGGAGTATTAGTATTAAGCTAATGAAGTCTTACTAAGACATGTAAGATAATTTCATTCAATTATAAAACGGAGAGTTGCTGGTTGGTTGACCCTCTAACGTGTTTGAAACTTAATGACCATTTACAATTATGTCCAAAGTTGGCATTATTTGCCAACATATTTCTGTGTAACAGTTACCCCGGTTCCATGTCTTCCGAAC
>Locus_52461_163
ACGGCAACTTGGAACGGGTAAGTGCTCTTGACGTGGAGAGAACGAACGTTTTGCCAGCCCTTCTTCAACAAAGAGATCAAGAAGTTGATGGACAAGTTGAGGTTGGTTCTCAACTCCTCAGGGGTCATCTTAACGTGACCGACGGCAACACCCAAGCACAAAA
>Locus_52460_92
GCAAGTAGAAAAGACAATAGATCAATAACTGGGGCTGACAGGGTCATCTTGCTCCTGTATTGTGGGTTCAGAGGTCAAGCACATTGTGTCCA
>Locus_52459_87
CAAGTTCTGGACACTCTGCCTCTGTTCGCCTAGTGGAATGTCGTCCTGGCGTAGCTGCACCCGTTGCGTGATCAGCATTGGATCCGA
>Locus_52458_79
CGCGGCAGGGGGAACGTTATGTAAGAGTGGTTTAGCTAATGTTGAACTGGGCTGTTTTGCTAATCTTTCCATAAAAAAA
>Locus_52457_71
TAAAATAAACGTAAATGATCGTGAAACTCATGCATTTCGTAATGAAGAATTATTTTTAGGGCTGTTAACGA
>Locus_52456_207
TAATACAAAAAAAAGAAAGAAAGATTGACGTTTTCTTAAAATGTAGAGTAATTAATGAACCAACAAAGTGGTATGAGCACACAAAAACAAGAACATGATATTCAATGGCATTGGTATCTTGAAGTAGATTCAATAATACTCAGACTTATTAATCATCATCTTACTATTAAATTACTTCAAAGTTAATTCATTTTAAAAGAATATTTT
>Locus_52455_71
GAGACAAACCAACCACGATGTCTTGCACAACGTCCACAACCATGTATCTCACCATCACAATGGGAAGGTCG
>Locus_52454_151
CTTGGTTAATTATAGTTCCTAGGTGTTAAATATATTTTCGTTGTTTCTTTCAGAATACAACACGATATTGTTCCTGCTTTGCGTTTTGTTAACACAATCAAGAAGACTATGGTCACTGTCGATGAACAAAATACCATGATGGGAAGTTATG
>Locus_52453_79
CTTGAGAACGTTCTTAATTTAAAGATTATAAAGTACAGCGTTAAATCAGGCCACCCCCACTTCCACAACATGCTGTACG
>Locus_52452_76
CTATTCTATTCTCCACCAGATAAATTACAGGCCTAACTATAGAACTGATTCTCCTAATGAGACCGTGGTTAACACG
>Locus_52451_93
GTAGTTGTATCATGTAATTTAAAAACTGTCCATAACATTGAAGGATAATTGCACCTAATCAATAAATCACTATTGATGACGGGGGGGGGGGGG
>Locus_52450_71
CTTTCTACCCAGAAACTTTCTAATGTAGTGATGTTCATTATACATAACTCAGAAAGATGGGTCTTTGAAAG
>Locus_52449_82
AAAAAAAAACTCCTCCATCGGTCTGATTGCCCATGCGCCTGCAAGAGCAGCTGCAGAGCAGCTCGAAAGGCAATCGCTGATG
>Locus_52448_72
AGTAGAAGTAGACGTACGAGATCTGATAACATAGGTTGAGATATTTGATTTTTCTCTTCTTCTACAATATTA
>Locus_52447_109
AGACACGCGAAGTAACAACTCTTGTGGCCCTGCTCACTTCAGACCTTCATGTTAAACATCAGACAGTGTTATATTTAAATAGCTTCATGGTTGATTTATCATTAATACT
>Locus_52446_92
GGGGTCCCCTATCTATATTTCGAATTCTCATTCAAAGTTCCAGCCAGTGATGTAGATCCTTACCTGCATGTCAACTGGTCAAATTATGTCAA
>Locus_52445_143
TTTAGAGTTTTAGAGAAGGAGTCTTGAATTTAATGTTGTTTGTACAGTCAGTGCTCTCCCTTTCTTTGCTTCAATATGGCAAAGCTCTGACAGTAAAGTTGCAGTCTGGTCCATACTATCTGAAAAATAGATCTTGACTCTTA
>Locus_52444_107
TACATTGTTTGGAGATCCGTTACAACAGAAAAATATAATTGTTACCTGTAACTACGTTGCCAGGCAACTTGGTGTAAACAAATGCACTTATGTGACTGATGCTTTAA
>Locus_52443_86
AAGTGCTCCTTAATCCTACTGTTTTAGATGTTGCTATCTGCGATGAGCTACGCGCTCAGTACACAATAATGTGCAGCCATTCAATG
>Locus_52442_94
ACAAATATGTTACCTATTAGCCAATCCTATTGAACCGGTTATGGAAGAGAAATCGGCCAAAGCTCGATCAAGTGAGCTCAATTCAACACCTCGA
>Locus_52441_101
TTTTTTTTCGAAGGAAAAGCACAAAATGATCCTAAGTACCATTTAGTCCATTAAAAATGTCAAAATGTTGCACTCAAAATCTTTTCTCTATTTAAAAAGCG
>Locus_52440_80
TTTAGTTGAAAACCTAAAAGCCTGTTCATTTGTCTTCCAGCTTGTCGTGGAGGTTAGATGTCGACACCAATGTCATCTGC
>Locus_52439_99
TCTGTGTTTAGACCAGGACGCCACAGCACAGGGTATCCATGATTTACAGTAATAACACAAACCATGTGGAATTTCTGAGCTTCAAATTGTAAAAAAAAA
>Locus_52438_71
TTTAATACTATAACCACACAAGGTGTGTTCGAACAAATTTCCATGACTTCGGTTCACCATCAAAACCAATG
>Locus_52437_101
GGGGAGCGTTCATTAAAGGGCTACTCTACAGTTTCATGATGAGAGATGTTTGAACTGCTTGAACCAGCAAAACAGTGTTCAATTGAGGAGCAACACATTGT
>Locus_52436_78
TAGTGACGTCGTGGTAGGCCATCTCCGAAATTCGCAATGAATAATAGGTACAATCTCTCAAGTGTTTTATAGTAGTTG
>Locus_52435_120
CCAAATTGTGTGTTTATGCATCTCAAAAAGAATTTCGGCGAAGTTCCCGTTTATATCAAAACTCGTCGCGAAGACATGGACAAAGCCAAACAAGAATATCAAGCCTATGTGTCCGATTAT
>Locus_52434_90
GAATGGTTCTCTAGCTACTGAATTCGAACCGTTCTTATTACCGGTAGCACCAGTGGTATTGGTCTCGGCATTGCTCGTTCATTTGCTCGA
>Locus_52433_80
GTGAGACAGAATAAAGTAAAAGCTAACACAACGTGTTGTATTTATATTGTAGACTTTATATGATATACAGTCGAACCCAC
>Locus_52432_125
GTTCCTATATGGTATTTAAGGGAGTGCTTCCGAACGAGTGAAATGAAGTCCAAATCCCGTACCTTAAGAGAGGACCAACGACTTACCCTATTGTGTAAACAGGTTCTGCTTCACCTAAAGCACAG
>Locus_52431_113
ACCACCCGGACCGACTTTGCTCCAGTAATGATTCAACAACATTTAAGATCAAATTCATGCATGTTGGACCCAACGGGTTCACTGCTGACTGCGGATACACTGGCTACTTCATC
>Locus_52430_81
ATTGTTGCCGTTAGTAGTTACTCGAAACGCGACTTCTTATCCTTTCTACATCTTTTTGGGCCTGCTGCTTGTTTGTGATTT
>Locus_52429_126
ACTAACCGACTGTTGGCTTTCCAAGGTGTCAATCACGTTTTTTAGCCACGACATGTCGTTCAGCCGGGGAGAAATGAGCTGGGTTGATTGCAGACTGCTTTAGTAGAAGTAGTGAAAACAATTTTT
>Locus_52428_81
ACTTTCAAATTGCACCGCTTAGTTGGCGGCCGTTAAGTCAATTGCGCGTTGATTTTCTAAATGAAACCAACTTAATATTTT
>Locus_52427_77
GACTCCACTGCAAACTAACCTCCATGGCGCAATCTTCTCTTGAAGAATATATGAAGTTGGACTTGGTAAGGCATAAC
>Locus_52426_74
TCACTCGCTCAATAAAAAAAGTGATTGTGGTGTTGTGCAGAAGCCTGCAAACGAACTTACATTCTTTGATCTTA
>Locus_52425_113
CTTACACTACTGTTCTTTGTTTTAAGAAAAAGCTAAAACTGTTTTGTTGTTGTTTAAGCTAAGTATTAAAATCAGATAGCGGTGAGCATGCGGGACTTACATGGACAGTTAGC
>Locus_52424_147
TAACACTGCTATGGTCCGGAGATTTCTCATATCTTTGCAAAATTGAACAACAACAAATCGCTGCATATTCATGAGATCAGATGTCAGACACATTCCATTGGACACGATGGAGCCCGTTTTTCTCCAAGACCATTCCTGAGAATCTTT
>Locus_52423_133
GAGCTTACTAGTCAAAGTTCGATAGAACCGTAGAAGAAAGAATTGCCGTCTACGAGCGCATTAAGAACACGCACCCGGACAGAATCCCTCTGCTGATGTATCCTTCGAAAGACACGAGTCTGGAGCAACTCAA
>Locus_52422_105
GAAATAAAGAGGAAAATAAATACATAAGCACAGTACCACATAGGAAACTTCACATTTTTACTGGCCTTCAGATGATACAGCTGGCAGTGCTTTGTATTGTGGGCT
>Locus_52421_124
TCGTTCAGGTTGATATCGACCGGCCATATCATATTTAACCAGCAAAGTCTAACGATAGCAGCAGTCATCTCATATTTCACCATCAAGTCCATCTATAGCTGCAGCCATCTAATACTCAACCAGA
>Locus_52420_109
GAACCTTCACTCAAACCTTAGCCGAGTAGAGGGAGAAAATGTGGTGAGTGCTCTCGATCAAACTTCGGTCTTTGTTTTGCTCGTGGATCGGGATATCAAGAAGTGCGCA
>Locus_52419_105
TAGATTCCGTCGCCTACTGCACGCGCTACTCCTCTCGTCACGACTTGGTCCCGACGCTCGAACCAACAGAGAGCGCAACAAGGTATCTCATTCTCTCTCTCTCTC
>Locus_52418_72
ACCTTACATACTTATAGTCCCAGAAAGCATATTCCATCATTATTGCCGTTACACAGGTGGCCTTCGAATGCT
>Locus_52417_148
GGCACTGATTAGAGCCTTCGAATTGGGTTGCCACGACTGTGATGTATTCCGCTGATCATATCACATGGAAAACATGTTCTCTAGGCGATGGTCGATGTCGAACACCAGCAGAGGAGAAGAATTGCGGCATGTTAGGTGGTGCATGTCG
>Locus_52416_112
CAGACTGGATGGTTCCCATCATAACTTATTCATTCCAACAAGCATTGATCATGCACATGATCCTAGTCAAGAGAATAGATCGAGACCAGTCGAGGATCAAATGTATCTCGGG
>Locus_52415_73
GGGCTGATTATTCCAAAGTGTGTTATTGATCTCCCTTGGTTGTTTTCTATTGATTGTGTTTACAATGTGGCAG
>Locus_52414_121
CCCATTATCACAACCACTTGCAGGATGCCTTCTACCACTGCCCTTAAGACCCACAGCCGCACCTCTCACGGACCCCGCCGTCCTTATGAGAAGGAGCGTTTCGAGCAAGAGCTCCGCTTGG
>Locus_52413_93
GTGTTTGAACTCAGATGGCAAAAGCTTTCTGCGACCAGGAAATGGGCGAAACAAATTTGAAAGTAATTCTTGGCCTGGCTGGTGTTGCTGCCG
>Locus_52412_101
CAACTTGAGTGAACAACTTCGTAGTGCTAGGACTGGTAGCGTCATTTTTGTAGGAACTCGTGCTGAACCACGGACTTGTGCTAAGTCAGGCCAACGAGACG
>Locus_52411_106
GTTCTCGTTTCTAGTATTTGTATTTGCGCAAGTTTTTTGATGAGCTGGGCTTTTTAGAGGTTGAAACTCCAATGATGAGTTTGATACCAGGAGGTGCCGTTGCCAG
>Locus_52410_86
CAGGTAACAGTAATCGACATACCATTTTTGTGCTTGGCCCATCCCTAAGTTGAAGCTTGGTAGCCAGCCTAACATAAAAATACCCA
>Locus_52409_103
ACTCAGTACTGTCTCTGTGCCACATTGACCAGTGGGTTCCTGCAAAGTAGGCAAATAACCATAATTATAATAAAATGCCAGAACTCTGGTTCGTGCTGAACCA
>Locus_52408_102
CGTTGTGTTTTTATTTTCCGATATTTCAAACGAGGTGACCACCTGGGACTAACAGTTTCCTGTGTTGTACTGAAAGCAATCAACACTTTCTGGACATTAAAA
>Locus_52407_147
TAAAACTAAGACAACGAGCTATCGTTGGTCCAACAAAGACGATTGCCGATGTGGAAACATTCTTTCTTGAATGTCGTGAACGATATCAACTTGATATGGTGATTGAAATCAATTCCAAACCGACTTCTAATGCTCAACGGAAACCTA
>Locus_52406_183
ATAAGCTCCGTTGTTTCTTTGATGAAGATAAACGAGATTATCTCTTCTATTTAGCATTAGGTAATGCTCGTTTAAATGAATATGAAGTTGCTCTAAAATTTCTCGATGCCATTCTTCATGTTCAACCCGGCAATCATCAAGCGAAAAATCTCAAAGAAGAGATAACACGACGCATGACTCGTG
>Locus_52405_104
TCAGGTAAGGTGTGAGTCACGTGGTTTCTGGTCATTGTTGCCTTGGCTGGAATTGTAGTTATACTCCTCATCATTACATTATTGTGTTTTGTAGAGCGCCGAAG
>Locus_52404_88
GCCTGCCGCCAGACCTAGAGGCGGCTGCCCAGGGTGCGCTTCTTGTTCACGCGGGCGAGCTGGGCGCCCTGGACGGCGAGGCGCTCGA
>Locus_52403_118
CATAAAAGAGTCAACAAAACTTAAGCTAACCATTTGACTCGTGTCTAACAACACAAGTGCAAATAACGTTGGTACGATTACTTGTCTCATTTAAGTACAATATTACTATATCAGAATC
>Locus_52402_316
AAAATTTTTACAAACACATTGGTATAGGCCAGGCCTGGAAATGATCCTGAAAGGAATCAGTTTTCACATACGCGATGGAGAAAAGGTTGGAGTTGTGGGTAGAACTGGTGCAGGCAAGTCATCTTTAATGCTCGCCTTGTTTCGTCTGGTGGAACCATGTCAAGGACAGATCTTCATAGATGGTATAGATGTATCCAAACTTGGACTTTATGATTTAAGACAGAAACTGACAATTTTACCACAGGACCCTGTGTTATTTACTGGCACGCTTCGGACAAACCTTGACCCTTTAGGGCAGAGAAGTGATAAAGATATC
>Locus_52401_112
ACCTCTGTAGTCATAACTATGAATCAGCAGGAACTCTAGTCGTGTTATTCCTGACATGGGGAGCATTGACAGAAGAGCTCGCTCACCAGTCAATGAAACTGGGAGCATTGAC
>Locus_52400_123
ATAGAGACTCTTCAACGTACATCAAAGTAGAATCTTTGTAGTAATCTTCTGGGAGGGTGTCCAATTTAGAGATAGCTTCATCGAATGCTTGTTTTGCGAGTTGGCAAGCTCTATCAGGGCTGT
>Locus_52399_132
TGACTTGTTAGTTTGTTGAAGTCATGGAAAGCAGCCTTCCAATAAAGTGTCAACAGCTTTCATCAGAGTCAGAATCAGGGTGAAGTTAATAATGTGGATCTCAAAGAACTTGAAGAATTTAATGTGGGATGT
>Locus_52398_112
TAAACCGGTTATACTTCAGGGAAAGAGCGGAACCCGCAATGGTAAACAAATTTGGGTTTACTAGGCAACGCTGTCTGACTAGCTGTAACAGGAGTGGGGGGGGGGGAAATAT
>Locus_52397_118
ATTATTAAATGGAGTATACTATGCTGCACGTCATACATTGTTGTTTGTGCACGGTTCAGTACGGACTAGTAAACAACACATTCGTTTCTGATCTCAGGATATGTTTTCATACAAGTTT
>Locus_52396_104
TAATATAACTAGTAAAACTTCAGTGCCAGCCTTTATGTGGGGGTGTGGAGGACTAAAATTGTGGGAAAGCTTTCACTAAATTATTACACTGGTTTTTGTGTCGG
>Locus_52395_87
TGCTTCCGGTCTCGGACCACGTCAGATTTCGGGGGTTCGGATCGACGGAGTTGTGCTGCGGTCTCAAACTGTGATATTACCCTGTTA
>Locus_52394_137
TCCTTGGACGAACTTTGAAGTTTTGAACTCTTGTTTAGAAGAGTTCCAAATATTATCAACTGGAAATTGTTAGGAATCAATCCTGGTGCATGTCTAGAAAGGGAGGGGGACAGTTACCTCAGTAGCCGCGACATTGA
>Locus_52393_112
CTGTAGATGCCCGCATGTCCGTTTCCCCAGCAAACCCCGACTCATGGGGAATCGAACGGCACGCGTTTCACCCCACGAAAACAACCTAAAACCCCCGTGCCCGTTGCGATGG
>Locus_52392_73
TGACAACTTCATTACAGAGGAAGGTCACTTTTAATATATTCATTCCCTTGAAATGCGACTCCTCCGTCAGAAG
>Locus_52391_81
CTCTGTAAACGCGTGCGTTGGCTCTTCGCCCATCGTTGACCAACGTCGACAGATACAACGACCAGAACAGCAGTGTTCATC
>Locus_52390_95
TACGTTTGGTCTTTTATTAAGTTTAGTTATTATTGTTAGAGTGTTGAGCTCAGCCATTTATCAAAATAGTCTAAAAGGAATATACATGACGTCTA
>Locus_52389_87
AGTTTTAGTTTCGTAGGGTTAATCAAAATCACCTCCTCATTCATACATGAAGACTTTCCTTCTCTGCGTCCTTGTCCTTCTTGCCCT
>Locus_52388_113
GTTTGTGTAAGAGATCGGATTGGTTCAGTGAAAGCGCCTGGTTTGAGTATAGCAGGAACTAAATTTGAACAAACCCATGTAGAACAACTCGATTTGATACTTGAAAACAAAGG
>Locus_52387_101
ATGTGTCGACTAATGGAGCTGAAAGCTTAACCTAAAAACGATACACATTCAAGATATGCCGAAACAGACCGTATCGACGAGTCATGCCGACGAGCAATATC
>Locus_52386_137
AAAGTGTGAACCACGCTTCCGATAGAAATGAAAGATATTTGCCCTTAGTTCAATTTATACATCTAAAATATTTGCATGATTCTGTTTGTAATGGTGTGTTTAATGTGTAGTTCCCAATTTTATTTAGCAAATACTGC
>Locus_52385_72
CAGTTTTTGTGTTAGCGCTACGGTCGCTAGTGGACATTCTCTTTCCTCTTTCCATTGACTTGCTGATATATC
>Locus_52384_87
TTATAATAGAGCAACCACGATTGCTTGGTGTGTTATTTGGTTTGTTCGTTTCTATTCGACGAATTCGTGTTGATCGAGCACGTCAAC
>Locus_52383_166
CACCTTACCTTTCCACGAAATTATTTATACTGAGGTGTGGTGTTCTCCTCCTGCCCCCCAGGGCGCCACCAGCATTGGCATCTATAAGGCCCCCCTTCCCTTACCATAGTGTAATGCGTATAGTGTAATGCGTTTAGTTCTTCATCTCCGTGGTGCTGAATCTCAC
>Locus_52382_79
TTAAACCACCGAAAATGACTATGTGATTGCTGGTTGACAACATACAAGCCTTGCCTAAAAGAAAACCAAATTGAAGTAC
>Locus_52381_87
ATGAGAGTGAATTGTTTTGTTTTTTTCACCTGGCTCATGTGAGCCAAACATGTCACTTGGCTCATATTAGCAAATATACCAACAAGG
>Locus_52380_85
ACGCGGATGGACGGACAAGGATTTCACAACCAACAAAAATGTAAATTAATCTCTGATTTTTTAACTAGTAACACTTGAAATTTAT
>Locus_52379_101
AGAGCGTGAACAACAGCATCTCAATTTCCAAGAAATCCTGTTTTATGAAAAATCATTTCTTTGTTTTGTGCGAGTTACAGTTTTAAGCACTTATAATTTTA
>Locus_52378_127
GTTCAAGACGGAAGTAGTCTAAAATGAGTGTAGGGGTTTTCTCGTGGCAGTATTGCATTACAAAGAGCTGTCGAGATCGTCATCTAGAAATTCTAAAAATTCATCCTGAAGCTCGACCCCTTCAAAA
>Locus_52377_112
GCTCTACTCTCAGGTTGCGAGGCATTGTTCGCAGGATGCAATCTTTTCCCCCCACACAACAGAGCAGACCGGGAATAGGATAATTTGAAGATAGCACTCGGTGGAGCTGTGG
>Locus_52376_92
CCTCCGATGTCGACCGTAATTACGTTTAACTACACCCTGGGTAAGTCTATAGTTCACCCCTGCGATGTTGTACTGACTGGCTCTCTCTTGAG
>Locus_52375_152
GTTTTTATTTCACAAGGTAGCGTTGACCAACCTGCCTGTCCCTGATGGTGAGTTTTTCTAAGAAGTGTCGGAGGAAGAGAATGGGATCATCGACAATGCAGTCCCATATGACTTTGTTGGCCACCTCAGCAACAGAAACTCCGTCTGCATTG
>Locus_52374_78
TGAAATAAATCAAAATTTTAAGAACTATTCTTTTAATGCTATTAGTAATAATATCGCACTTTTTACTATGGCGTTTTA
>Locus_52373_117
GTCGTTTCTCTTTTCCCTTTGCAGAGCAGAACGTAAAAGAAAGAGACCCGAGAAAGAGAGGCTCCTGAGGCAAGCAGGTGAGAGGACTGACACCGATACAGTTACGGTCGATGAAGA
>Locus_52372_114
GGTCTACTATAGGACGACGTCAAGGTTATCTCAGGAGTACTGGCGCTTTGGGGTTTCCCTTGCTAGATCTCGAGTGCGAGTATCCCACTATTACTCTGTTATGCAGGATGGGCG
>Locus_52371_100
CTACTTTAACGGATATTCGATTCTAACTTCTTGTTCGTCTATTTTGTAGACAAAATTTACATAGTGTTTCTTATCTTTTTAAAAGACGATGTATGGATTA
>Locus_52370_86
CGACGGAGGAGGAGATCAAACTTCATCTTACTTTCAGCTGTCACTTTCTCTAGCTGCAGTTTTTGACGTGTCTGTTCTTCTTTCTC
>Locus_52369_101
GAGCTGGGGCCACCTTGCCTACTGATGAACCAGGGTGTGGAAATTGTCATCGTTACGAGCCTCCTGAGGCGTCAGAAGACGCAAGTTCTTGATGGTTTCAC
>Locus_52368_72
TTTTCTCTTTCTTAGGGTGCATAACGAGCAGATTCGTAAGAGGATAGTGAAAAAGGAAATTAACGATCAAAG
>Locus_52367_121
ACCGAAGCGTCCTTACGACTTAGTACTCTGAGTTAGAGCTTCTGATGCGCTGGTTTCTTTGGAGCGTTCAGGTTCTCAATCATCTTGGCGCTCACGGCTTTGGTCAGTCTGTCATTGGCGA
>Locus_52366_75
CACAACGACGAGAAAAGTACGTGCCTGTGGTCAACCTGTTCTACGTCTTGTGTGGAGGACCATGTATAAGGAAAT
>Locus_52365_86
GATGTCTGACGACACGTCTACCATTCGTCCGCTGTCCGACTCCTTGAACGGGTGGACTTCCCCGCTGTTCTTGTTGGCAACAAAGT
>Locus_52364_88
GAACTAACATCGCATGTCGCTCATCATACCCTGGTGGACCACCTTCTTTGACTGGATAAGGATTGAATGCTTGTTGTTGAGGTGGATA
>Locus_52363_93
GCCGGAAGCCCTCGGCCGTGACATTCCTGCTGGGCGGCAACGGTGTCTTCGGCGTGACCATCCTCATAGTGGACGGCCAGAAGAGCTCGGCCG
>Locus_52362_77
GTTGAGTTTTATAGTTCATTACAGCTTAGAGCAATGGTTTACTGGTCCATGTAATTTCATGAAACATTTACAATGTA
>Locus_52361_96
ATGTGGTGGATGGTGGGGTTCTCCAAGCACGACTTCATCATGGGAAACCGGAACTGGTAACACCGAGGATCTGCTTCGAGCTGTTAACATTCCGAT
>Locus_52360_71
CTTTTGAAGCCGGACGAAGTGATTTCTTCGTGACTCGCGAAAGTCTTCAGCAGTATTGAAAAGAAATCATT
>Locus_52359_96
GAGTGAGCGAACAGGACCGGTTGGCACTTACCAATATGGATCGTAACGAAACACCAGTTTGGCAAGACCCCAACACCCAAGGAGGCCCGCCTCCTC
>Locus_52358_98
TGACCGCGGGGGCACAGTGAATTACACCACAAACTAAGTCCTGAAGATGACGTGAAACACATGTTGAGAGCTGTTGTTGATACTTTAGGCAAGGCGGT
>Locus_52357_79
AACGTCATTTAGAGCACAAAAATTTGCTTGATTAACAACAGTGCGCCTGTTGTTTGTGGTCGGGGTGGCACTAGGTTCG
>Locus_52356_73
GATTTGTCTCTGCCGGGTATTCATTCTGCCCTCCCTTGCAAACAGCGTCCACGAATGTATGTTTGCTCGAATC
>Locus_52355_81
GATGTTCAACGGAGCTATTAGCAAAAGGATCAGTAGAGACAAAAACAATTGACACATTTGAGTCTATTGCCTTCTGTTCTC
>Locus_52354_89
GGCGTACCTTCCAGACCTCGCGCACGAAACGAGATACTATTGTGGCTTCACCCTGCTGAAGTACTGCGCGGTGCATCTCGGACTCGAGG
>Locus_52353_118
TTTCGAAACGATAACCGTTATATAAAGAAGATGAAGTGTCATTTAACACAGTTCCTGATTTAGTGAGTCATCATAAAACTAATAACATTAAACTAGCGGATGGAGGCACAGTAATGTT
>Locus_52352_136
GGTTACCTTACTCTATTTGAGAGACATACCAGTCTCAAGGAATTTCAGGAGTTGTTTTGATGGTCTTGACGCCAAAGAGCAAGTTCTGTCGACCACTGTCCACACACGTTACCAAGAAAGTGGATTTTTTTAAAAA
>Locus_52351_107
CAAAAGTAACCCGTCCGATTGCAGCAAAGGTCGTTTCGGTATTGCAAAACCTTAACGTTATTGAGATGGTATCTGTGGATAAAATAACAGTCAACTTCCTTTCCATG
>Locus_52350_152
TTGTCCCATTATACGGGTATCAAGTCAATGTCAGCCTTGTTCACAAGTCGAGTTGGTGCAGGACACCACAGCTAGGCAACAACATGAATCTGATGTTTTACACATAGAAAAGTCATTACAGAGCTTAGTGGCAGAAATGACAGCAGATGCGG
>Locus_52349_84
CCTCAATATGGGAGTTTACCGCCCTGGATTTTCTATAAGAATATTAAAGAAGTCTCCACCGGAATTCAGGATTTTGTGATTTGC
>Locus_52348_75
AAGCAGAAGCTTCTCGTCAAGATCGCGAACACTGCGATTGATTGGACGCGTGAATTTCCACTCTTTCGGAGGTTC
>Locus_52347_88
CCGCTTAGCTCTGTGACCCTAGATGCAAAAGATGCCCAACAACAACATCGGTTATCCTCCTGCAAGTCCAGGTCAAGCGATTGGTGAT
>Locus_52346_71
GGGTGATGAGGACCTACACAATCACTTCGTGACAAAACTGTTTGCCAACGTACACCTGGCTCAAGGGCGGC
>Locus_52345_99
GGCCCCAATCTGACCTTCTTGTGGTCCTCGTTTTTTTGGAAAACGATCGTAAAGTTCGACCCAGCTTTTAAGTGAAGTCAAATAAAATGAGAAATAAAT
>Locus_52344_139
TTTGTCATTACGAAACTTTACAATACATCGAAAATATTGACGCACTAATCATCGTATATAAGTGTGTGCATCGTGTGATCTTATACAAGTGGTATATCCTGTGATCTTATACATGTGTCTATCCCGTGATCTTATACAA
>Locus_52343_88
TAAGGCAACATTTTAAACTGTGGTCGATGTCAGAAGGCAAAGCGTCATTGGCCACGGTGACAGAAGGCTCAGTGTTAGACAGAGAGTT
>Locus_52342_72
AAAATTTACTTTTAAATTAAAAAAGCTGAAATCACTTGAAAATTTCTTTGATCCCTGATACTGTGAAGATAT
>Locus_52341_89
GAACAAACAATAAAGGCCGAGCTAACTTGCTCAGAGTTACAGGCTACGGTAATCTTTAAGTTTAAGGATTTGGCTGGGTGGCGTTTTTT
>Locus_52340_110
GCACGTCCCTAAGAAGACAATCAATGAGTACATCCATGACAAAGTCTTCTGAGTCAAAGTAGATTAGAGTTAAAGGACATTAAGTCTGAAGAAATGGCTGATACCTGGAT
>Locus_52339_155
CGTGACTGGAGGCGGGTGGGGTCATTTGATGTGTTGAGGTGTCATCTGGAAACAGATCCGGCAGATCAGTCAAACGAGAATCGACATGTTGGAATACACGAGTAGATTTCACCATTGCTGGTTGGTCATTCTTAGTTCAAACATTTGTATTGCTA
>Locus_52338_71
AGTTCGCGGTCCGACAGCCGATCTGGAACTGCAGATCGTGCAAGAAGACCTCCGCTGGTGGTGCTTACATG
>Locus_52337_185
AAGATGGCAATAATAAGATTAATGGACTTGACATCGTTGTTTACGACACCCCTGGTCCGTATGGCACAAATGAAACTGAGGAACACATGAAAAAGAAAACTGTTGAAAATTGTGACGCACTCATGTATGCGTGTAAAAAAGTGAATGTTTTTGTTTTTGTTATCAATTATAGCAATGGTTTTTCA
>Locus_52336_82
TAAAGCCGAGGCAAGTCCCAGACGACCCGGCACTTGGGAAACGCCGGTTCTTTATCATGATCGGGTTCATTAAAAAAAAAAA
>Locus_52335_98
CTTTTAAACTCCTACTTGTACAAGAAACGTTCCACAGGTTCGCAGCCTTTAATGTATCGGGCAGTAAATGTCAGTTGATCTATGTGTGAGCTGTCTGG
>Locus_52334_105
GACATGAAATAACTTGATCGAGAGTCATCATGTCTCAGCCAGAATCCCATGCCGCCGAGGAGGCCACCACCATGTGGTCCAACCCCGCTGACCACTTTCGTCCCA
>Locus_52333_88
TTTTTTTGTTTGGATCGCGAAGACGAGGGTTCTTAAGCTACTTGTCAGGGGTAGATACGATCAAAAAAGCATAGCAGCTGAAGCGAGG
>Locus_52332_97
CCGCAAAGCCTCTCAAACACCGTGAGGACGACGTTGATACCGGTGACGCTGGACGACGACACGCCGGCATCTTCAGTCGCGGCTTCGCTGCCTTCGG
>Locus_52331_90
TTGTTTTAGTTGTTTCCGCGCAGCCGGACGTGGTCAGCCGGTGAGCAGAACTGGTCTTGTGCGCTGCCCAGGAGCTTGTCCGGCTTTGCG
>Locus_52330_115
TAAAGAAACCCGCCTTTCTTCATCCTTCAGTTAAAGCTGCTTTTCCTCCAGTTGGTTGGCATAAAACAGTACTGCAAGAAGCACAGATTACGACAGTTTGAGCATGTGAAAAAAC
>Locus_52329_103
ACAGCCACCTAAGACGAGAGGACCAAAATGAGTTGAAATTTGGAAACAAAATCTTTGGTGTTCTTGTCAAGATGTTTTCTAACGTTTACAGCCTTCTTGATCA
>Locus_52328_77
AGTAGTAGTAGGAGTAGGAGGCTGTCTCCATGGTCACTACTCACTCCCAATTCAGAAGCTAGATAATATTGAAGTGG
>Locus_52327_101
TAGTCAACCGGGCTGGTAGGAGTGCCAGACCTGCACCACCACGACCAAAACAAGATATTATAGAATCTGAGCCAGCCATGAGGTTAGGCACAGGTCAGCCC
>Locus_52326_115
CTGGAGGTAGTGCTGGAGGTTCACGGCCTCCATCACGGTTAAAATCTCGAGCTCCTTCACGGCGTCGTGGACCATCACGTGATCTCCATGATTGTTCGTCTTTATCACCACGATT
>Locus_52325_71
TTATGACATCCCTGGGGTCTCCCATCTCGTGTTCTAACAGTTTCCATTATTGTCCTTGGTGCGGTCAACCA
>Locus_52324_93
AATGGTTCTCTATAAGAAGCCCGTGATGCGTCTATCGCTCTTGCTTCAAGCTGCGAAAAGTGGTCGACAGTTACTTGTCAATTGTGAATCACA
>Locus_52323_149
GAGTTTCGGATGTCGATGTAGATTACAGTCAAGTTGATTCAAAAACAGTATGCACGAGTGGCTTGCTTCAAAACATTGACCAAATTGGCTTTAAAGCTGATGTTACGCTGAGCAAAGACGTTGACAAACTGCCCTTTGTCGGTTTTTTT
>Locus_52322_72
CGTAATGTATAGGCCGTGTTCGTTTGTAAGCGGCCACTAAAGGATTCCAATGTACTCCACCTGGACGACGTC
>Locus_52321_113
CCATTATATATGAACAACATTAGCCCGTTCGTTACAAAGGCCGACTCGAACTCCCCATTCTTTTGGAGGACAAGGTGTTTAATGTGTGTAATCCACTCGCAAGCCGACCCCCA
>Locus_52320_95
TCAAGAAAAACACATAAAAACAATTCTGGCTTTAGCTTCACATATTTGCTTGTAACCTACAATGACCGGAGATTTAGGGACACATGGGACATCAG
>Locus_52319_146
TTGAATGGTTCTCTATCTGTCCGATTCTTCCCTACGCGTTGCTCGGCACAAGCATGGCAGAAACGAAACCGACGCACAAAGTCGAGTATTCCGTCGACTATGACTTGGAAGAGCAACAGAAGAAACCGCACGCGGCCTGCGATCTA
>Locus_52318_108
CCGACTTAAGCCGTAGGACCTTCTGGAATTCGTTAGTTCAGAAATCATCCGAGGGACAGCTTCGGTTCGAAATGTTTTCTCTGAATAATGATGGCCGCAGGTAAACAC
>Locus_52317_106
ATAGGGACCCCCGGTTTCTCGACTCAAGTTTTTCACTAGTATTTTCTATGCTGCAGCCTCAAAGACAGTAGGGAAAACCTTGCCTATTTAAGTTGATAAATTGATT
>Locus_52316_281
AAGATCTTAGGTTTTTAATCCTACATAAAATTATTGCTAGTATATTCAGCTAATACCGCAGGTCACACATTAGAAGTTGAGGACCTTTGTTTCAAGATGTCGCCAAAGATGACTTGACGAGGTCAGACGTTAGCAGTTGAGGACCGTTGTTTGCAAGATGGCGCCAAAAGATGACTTGACGATAATTTTCCCGACATTCCTCCCGTCGTAGAGGGCGATAAGCGCGTCTGGTAACCTCTCGAAGCCATTAAACAAAATCTCGCGGTATTTGAGTTTTCCTT
>Locus_52315_88
TAGCTGATGGTTTCTCTTGCCAACAAGCTTGAAATCTCCAAAGCTAAGGAGTTGGCTGATATCGAAGCTACCAAGTTCAAATCTATCG
>Locus_52314_184
CGTAATAAGTTCAGGGGTGGTTGATCGAATCCAGTTATTTCAGCAAGGTGGACGTGATTGCTCATTATTAGATAACCCGATGCAACATCATTTTCTGGGTGATCTTGCATCGGAGCCAGTAACGAAGAACAACAGAAGCGTAGCGTTTTTTCAAGAACGTGAAAACTTTGGACATTTGCCTAGC
>Locus_52313_140
CGCAAGATGAAGTTAGTACTACAAAATTCCCGTTCGAGCCTTCTGCAAATGTCACCCCTTTGGAGTTTGGTTTCGTTATGCCCTTGCACCAGTGAAAATTGATCCTCGTTTTTCAAACTCAACAGTAGCTACAAATACGT
>Locus_52312_143
CGTTTCACATCCAAACCAAATAGGGAATCTAAAGACCTGCGTGGGGGATTGCTTGGGAAACATATTGGTCAGGGTGTAAACGGGAAGTGAGTGTGGGGAGAAAATGATAGGACAGGCACACGATAACAATGATGGTATGGACA
>Locus_52311_71
TTTCTGTCTTTACATCACAGCACTGGTGACCCTTCTGAAGGAGATTCCAATACACAAGTGAGGAACACAGA
>Locus_52310_73
TTATAATCTTTCTCTTGCTGGATAGTGCAGATCTGCCCCATATCGTTGGTCTTCAGCAGTTTCCCCAACTTTG
>Locus_52309_178
GTTCTTTCTACTACGGTTCCAATTAAGAGAACTGCTGGAAAAGTGTGCTGCTACAGCTCTAAGTTCTAAATTGGTAGCAGCTCACAAAGACTTTTTTGCCAATATGGTGGTAGATGCTGTCCAGATGCTCGATGACCTGCTCCCTCTTAATATGATTGGTATTAAGAAAGTTCAAGGA
>Locus_52308_72
AGAGAGAGAGAGAGAACGACGTCCCACGTTTTACAGTCAGCCAGCGACAGCAATATAATGATTCCAGTTAGT
>Locus_52307_137
TTCCGCTCAAAGTCACCTGAGATGGGTCAGCAGCAAAATTAGCTGCCATGGGTATTATACAAATCGATGATGAATCAGACTGCCTTTATGCTGAATATTCTTTAAAAATGTTCCTTAACGGCTACTGTTATGAAGAA
>Locus_52306_111
AACCGTAGCAACCGGCGGTCTCTTTCGATATCATCACCGGTCTTCGCAGCTTGCAGAAACTCAATGTTGGTGCGATCGAGCATAAGATTGGTTACCAATGGGTTGAGAAAC
>Locus_52305_102
TAACTTGCACTCGTTCAGAATATACTGAGCGCAAGTTGCTGAAGAGTTCACGGATCCTGTGGAGGGATTTCGTTGAAGATGGCCGCGGGATTGATCGTTTTC
>Locus_52304_79
AAGTCATAATGAATATATAAACAGGGTGGCTATTGTTAAAATTTTTGCTTTATTAAAGCTTCTTTCTTTCTTGATGGGC
>Locus_52303_154
CCCATTAGTTGAACGGTTGATGTATGTTCTAAACTCAGCAAACCAATTGAACAAGATATTTGCGGTATCCTTTGCGAAATCGTCGGTATTGATGCATTTATCCACATCATTGATGCAGTTGATCCTGATCCAATCTCTATTTGCGAAGAAATCA
>Locus_52302_109
GTCCTCAAGCAGGTAAAACATCCAAGGTAGCATTTGCAGTTTGGATGTCGCCCAGTCCAAAAGTATTGGAGATATCTTCTTCCATTTGGGAGCTGGTGGTGCAAACATA
>Locus_52301_78
CCGGCTGTAAAAAGGTTTTTACCAAAGTAAGCAGTCAATCCTGGCATACCCAAAATGCCCAAGTAGAGAGAATCTGGA
>Locus_52300_92
AATGTAACCTGCCATGAGCAAGACACGTTGGCTCCCGATACAGGACTTTGGGTGCACTGTGGGCTAGAAGCAGGCAGTGTGGCACGACGTAG
>Locus_52299_151
CCCTACGCATGATGAGGGTCCTGTGCTAGATGTGGCTCAATTTTTGTTATTAGTCATAATGGGATCGGTGCCCTGTGTTGATGTTGAACTTAAGATTTAATTAAGTACCTGTGAGTGGTGTGGGGGAGATGGCCATCAATACCACCTGGAA
>Locus_52298_72
TAATACCGACCATACTAACCTATCTACGGTCTTTTGATCGGTATCATTTTAGTCACAACTCGAGTTAAAGCT
>Locus_52297_106
CACGCGTATGTGGCTGTGGAGGTATCTATATGGGTGTTCGTACAGCACCGTACTATCGATCAAATGGACATAGTTCACGTCGTTCACCATCACCGTATCGTCGATC
>Locus_52296_110
AAAAAAAAAATGAAAGGTCCAAATCCAATAAAACTTTTCGGCATTTTTTGGGCCCTTGCATATCTTTGGGACCTCCGTAGCATGTTTGCAAAAGACCGGAACCCTCTATC
>Locus_52295_85
GTCTGTGTAGTTGATATAGGATGTCATCAAGTCATCCAGCTGGTGATTCAGAAGACAATATCAACAACAAACCTCACTTCACCCC
>Locus_52294_72
AACACTTTGAACTGCAGTTTTCGTTCAGGGTGAAGCCGTATTGATACAAGACCAGTTGATCACATCAAATTA
>Locus_52293_159
GTAGCTGTTGTTCACGGGGAGGACTGGAGATATCTCCATCCGTGGACGTCTGCTCCGTGGTGTTGTCGTGTCCAACAAGATGACCAGAACCATCGTTTTGCGTCGTGACTACCTCCACTTCGTCCCCAAGTACAGACGTTTTGAGAAGCGCCACCGCAA
>Locus_52292_87
CAGTGTGAACAGTCACAAGGTGCTCAACCCGAACCTGAACCCGAACCAATCGATGAACCCATTGAACAAGAAACCCATGAGAAGCCG
>Locus_52291_90
TTCTTTTTCTGACCGGACTGCTGCAAATTCACTTTTTCATGCTGCTTCCCCAAGCGGGTGCTGATGGCTATGGATACTCAGATGAGGTCG
>Locus_52290_89
AAGAGGACGAGAGCATAAGTCGAAGATAACATTTTTATAGTTATAATCCCATACAGTTGTGAGCTTGAAATAAAACCATTAAAAAAAAA
>Locus_52289_205
CCTTTTAATCCACAGTTTTAGAAACTTCAAGATTTTTGTCTACAAAACAATGGGGTCCACGCTCAAACCTCGTGAATTGGTTGTTAAGAAAATGTAGTGGTCTTACCAGTATAAACACTACTGAACCGTGTCCTGGTTTACGTCTGAATGGAGTAGGAGGTTGCGTCACAGCTCTACTTGCACCCAACCGTGACCAGTGTGTCTG
>Locus_52288_202
ACTCCGTTTGTCTGTTCCTTAGACTCTCAACGACCTGTTCGCGATGGTCGAAGTTGAAGGTCACAAGTACTCTGACGGCTACTCATATGTCTGCTCATCATACGTTATGAGTTACTACACCAGATCCGGCATGTTGGGCGATATTGTAGCCTATGCCACCGAGTTCACCCCAAGAGACGTCTACTCTCTTGATATCTTCGAC
>Locus_52287_106
CATGTTAAACAAATACGGAATTATCAGCCATCATGGCCCCAACCCCACACCTTGCTCCACTCTTATTATGGATTAGAGACTTTTCATTTTTTATTATTCAAAATTT
>Locus_52286_115
CTGGAGGGTCCGGGATAGTGTCTTGCGAATCTTCCTTTGAATCTCTCCAGTCCCTATTTTTCAGTTGCTGCTGACTGCGAAAACGCTGCGTGTGTTACCATTGGAAACCTCTTCT
>Locus_52285_72
CCGCTTCCAATACTGGACAGCAACGCTGACCGTGGCGGAGGACGAGTTCCTGATGAAGGTCCCGTCGTTCTG
>Locus_52284_136
GCCTCAGAGTGGTCCGAATCAAACAAACAAGAATACCAACTCAAAGCCAAACACTTTGTACCTCCAGTGGCATATGCGCCAGAACTCTACATTTTGGAGACAACTCCAGAAATGAGGGATGCCATGGCCATCAGTG
>Locus_52283_107
TCCTTTTATGCTTACAGTGCTGTTCCTGCATTCGAACAGACACCAGTCTCATTAATGCCACATTAGTGTGGTTCCAAATTTCGGATAATCAAAGTACAGTTAAAGAC
>Locus_52282_102
CCCGTGGACAGCCAACCATTACATATAGCCACCACCTTCCTCAATTTTCTTAGAATCAGCAACAGCTTTCCTCTGTTCGGCAAGTTTAAAGATTTCCTCAAT
>Locus_52281_94
ACGTTTAGGACCGTCCGTGATTGCACGGCTTACATATCTCATTCAACGGTTGTGACTTGTAATTTACCCATTCCTAAAACTAAGCTTGTACTTT
>Locus_52280_93
GAAATAAGTCAACCAAATTACTTTATCCAGGGGCTAGAGGCAAGCATGTGCAAGTGACCGTTGCCCTTAAAACCAATGTTCCCTCTAAGGGTC
>Locus_52279_101
TGCTGGAGTAAATCNNNNNNNNNNGCAATACGTACAGAGTTCTTGAACTTGATGGAGGCTGACATGCACCTAAAGCCTCTGCATACTGTTTTATTATATTG
>Locus_52278_236
AGTGTCTCGGTAGTCGAACTAGCTTTGGGGCTTCCCATTTTCCAGTGGGAGCGACTGACTCAAGGTAGCCCTTGAAAGCAGCTTTGCCAGTGAAATTTCCATCCTTGGCGCTGTTGAGGACGATGTCATCGGTGACCAAATTCAAGCAACCTTCGACATTCTTGTTCATTCGATGGTTCATGTATTGGGAGGCAACGGCAGAGTGTTGTGTGTTCGACATCCTGAGACGAGCAAAT
>Locus_52277_145
GTCTGTATAATTTTCTGACAGCAATTATTTATAATGGAAGACTCAAAATTGACAGAATGTGTGGTGAAATGGAGGAGCTTGCCAAACATGGGGTATCACTGCCTCCCAACATGCAGGGACTGACAGATGAACAAATAGAAGAACT
>Locus_52276_95
ACTCTACACGTGTTCCGGTGGTCAGTTTTAATATTACATTTTACTGTATCATCAGTGGTTATATCTCAGTTATCAACATCTTTTTAGATGAACTA
>Locus_52275_118
ACTTTTAGTCGACTACGTCGGCTGACCTCCTCAGCCTCTTTGACTTTTCTTCTCATCTCTGCAAGTCTCTGTTGGTGGGTTTGTTTCTCAGTTTCCAATTTCTCCTTTTTCTTTTTTT
>Locus_52274_87
TACTTAAACTGTCGGTCAGGCAGCTGACAGACCATCAGCAGGTGTGCATAGAAGCAGCACATCAAAAGCAGCTGCACTTGGTTGACC
>Locus_52273_103
TAGCCGTGTGAGGAATCCTGTGAAGATAAATCCACATAAAGTCAGGGTATCAGAAGTACGAGCTGTGACAGAAATTCCATCCATACCGTAAGGCTTGAAATCG
>Locus_52272_84
AACGCCAAATGGTTTAGCATTCTCTGGCGACACTTCTGGCAGTGGAGAGAATTGGTTTCAAGCTCCCCATTTTGTGAGTACAGG
>Locus_52271_92
CTATTTTATCGTTATAACTCATCAACTCCATTTCTGTCGAAGGCATGTATTTCAACTTCCAAATTTGGATGCGTTGCTACCAAAGCCTGCCA
>Locus_52270_71
TACAAAGTCGATCCCGGATTGACACACATGTTTCAGCTAGGCCTAAGACACATGTTTCAGCTAGGGCCTAA
>Locus_52269_75
TTAGTAACGACCGATCCCAAGAGACAGGTATTAATACCTTCTCTGGTAAATTGGTATAAACAGGATATGGAGCAT
>Locus_52268_82
CATTACTAAGCCTACCAAGTGCGAAGATGCTATTGATCTCTCGTGCGATTTCATAGAGTACAGCGAGAGTTTCACCGGCTTG
>Locus_52267_73
TATAACTAAGACACGTGTCAGATGACAATGATGCTGCCTGTCAGCCTACCCGGATATTGATTCTGTGCACAGT
>Locus_52266_163
TTGTCTTTACGTTTTCTATTATGTTTCAACTTTGCAATCCAGTAGCAGTTAAAGCTTCTGTATTTGACTTGAAGCCATGGTACAAATGTGCAGGTCTTCATCAGCCAGTAAAACATCCTTCAAGCAATGCATTGCTCCTCTCTGGTTCTGTTTAAAAAAACAA
>Locus_52265_79
TCGGGAGCCTGAGAGGAGCGTTTGAAAATCTCGTTGTAGCGTGGCATAGATTTGCTGAAAGAAGTGATCACACGGCACA
>Locus_52264_205
ACAGTTTCATGGATCTGATTGTCTAAGTTAAGTGCTAAGACTAGTCGTACTAACACTCGGCAACATCCTTTTCTGAATGTCTTGGATTGGTGGGTCACAAAAAACTCTGGGGCGGGACGCACTTTTCCCAACCCTGGGCTATACTGTAACTATAGGCATGGCCTCATCAACTATGATACTACTTATAGTTTATACAATTTATTTT
>Locus_52263_85
GATCCGACAAGCCGCCCCGTTCAAAGCCAGTATGTAGCATGCCGCTGTTACCTACACTAGCATCAGACATGATCCATGTATTTTT
>Locus_52262_103
CCTGGGTTCTGCGGAAGCTCTCCCTCGACGGTGTTTTCGGCTCTCGCAAGCACGTCTCCACTCAAAAGAAGGGTTACCAACCTCCTCGCTCCATCTTGACCAA
>Locus_52261_75
CTACCTTTGAGTATAAACTTCATAAACATGTTGATGTAATGAATCAACAGGGCAGGTGCACAATGGGAGAGGGTG
>Locus_52260_100
CAAAAAGTCGGTGTATGGTTGTTCATGCAGACCGAAGTCACCGAAGACGAAAAGAGTATTCCCTCGGCCTCATCATTTTATAGATGATAGATATTTCTAA
>Locus_52259_123
TGAATGGTTCTCTAACTTTACATTTTTCATGAGTGAATCACAAACAGCGAAGCGATTGCCAAGACCTGATCTACGTGTTAATCCAAATAAATGGAGTGGTGCACAGAATCGTAATATAGCTAC
>Locus_52258_97
CTCAACTTCTTCAGTATGGTACTTTAACGAAGCCTTCCAAGTTTAATACTTCGTCTTCATTGACTGCGACAGCTCAATTAATTGATGTTTAAGCTGT
>Locus_52257_72
AAATGCTCACAGGTCCTAATGCTCCGACAGGGGAAATGGAAGTGAAGAATCCTCTTTTCCGTGGTGATGAGA
>Locus_52256_102
CCCGGTCAATGATTTTGTCGTAGCTCTCTCATTTTCGGATCTCTCATCTACGGAGCTTACATTTTCAGAGCTAGACAGTCATATAACGATGTTGCAGGAAGA
>Locus_52255_83
TTTTGCTGCGTCACACTACTACTATGATCAATAAGTTAATCAGTCATCGGTTACCTCGCTTCTTTTCTTCTTCTATTTTTTTC
>Locus_52254_133
ATTTATAGGGAATGAACAGTCAAACCTCTTGCATACTTTTCAGCAGCTATATGCTGTCAGGATTGTTTCCTTTAAGCTGTGCCGTTGCGCAGGTATCTGACTATAAAGTAGGCCAGCAGTTAAGAATTACAGC
>Locus_52253_89
CCAAAGCGACCACTACTACGACCACGATCCGTCTTTCCATCGGTCGTTGGTCGACCTCGTCATCAAGCTGTTATGGTTGGTATGGGTCA
>Locus_52252_242
CATGTCCAGAGCGGTTTCACAGATTCTCCTTGCTACAGATGAGTGTGTGATGAAAATGACATTGAAACGTTTCATCTTGTTGGTGGTGGTTACCATGACAATGCCCCGACAGGTCATGGCACAGGCGCCGTATCGTGATATGTGTGACGAAGAAGAAGGACCCAGTCAGCGAGGGTTACACCGGTGTGGGCTGACTGAGTTTGATGTGGAGGACTCCAGACTGCTGGAACGTAAACGATCAG
>Locus_52251_84
TTTCAACTTGCTCGCGATATGAATTTGAACTCCATGAACTGATAGATGGGCGTCAAGACAAGGCGAGCTGCGTCGTTCTTTTTG
>Locus_52250_105
CGGAGGAAAACCATTAGCGAGGGATTCTGGTCACTGAAAAATCGGAGTATTCCAATGCACAACGCCCTGTCTCTAACACGGCGTTTCTGGACGATATCGATTACA
>Locus_52249_86
GAGTACAGACACTACTACCAGGGCCCCAGCTTCTCGTCCTCCCCTGGGACATACATCGGTAACAGGGCAGGAACCTTACAGTTACA
>Locus_52248_103
AGTTCGTGTGCAAGGCGGTATACACCAGAATTCTCTCACACTCCGCTTCCCGCGTTTTCACTCATGTGATCTCTCAGTCATCTAACACGCGATTCACACGTGA
>Locus_52247_89
AATTTCCCTTGTAACTAATAGACACCTGTATGTGCAAAATGGTTTCCACTGCTGGTTGATATATGCTGCATGAGCAATGCTGCCCCTCA
>Locus_52246_75
CTTTTATGGCGGAACCTGGGGTTTTCAGACGATTTTATTCCCTTGGCCGTAGGCCTTAGACTTTTGCCAACACGA
>Locus_52245_119
GAACCTCGGACTCCGACGGACAATGAACTTTGACCCCTATGCATGACAAGAGCAGTGTTCAGAAAGGTTAAATGTTTTGGACAACCAATGGCCTGACCATCGAAATAGTCAAGTCAAAA
>Locus_52244_73
ACTGTCGGGATTAACACTCTTGAAGACATGTGCTCATGTTTTAACTGCTGTGAAGTGTCATGGTTGGCTGGCT
>Locus_52243_101
AAAACAAAGAGAGGAAAAAGAGTCTGATCTGGTGGAAATGTCTTTGCCCAATAGAGGAACTCAACACTACATGGCTGAGAAGGGCTACTACGTCCAACCGG
>Locus_52242_73
CGTAGGAAACCTCGAAGAAAGGGCTCCTGGTTTAGAAGTTATTCTGCAGTGAAAGAATTTAAACACATTTTCA
>Locus_52241_72
AAGTCCTGGTCTGCTTAAACATAACATGAGCAATATTATGACACTCGCGCGGTGCCAAGATGCCGCCGGCGG
>Locus_52240_143
CATCTGCGTCCCGGTTTCAGAGGGGGGTGGAGAGGGGGGAAACGACATAACATGGTCACCACCATTGATGAGAGGCCAAGGGAATGAGCCACACGACTTCGAACACGCCGAATGGAAGGCTCAAATCTTGCCAACTACTTTGA
>Locus_52239_77
CAAAGTTGTGTTTTGTTTTTCATTCATCGAATCGCTTGACAATACATACACAAAATATAGCGTGAATGTGGGTGTGT
>Locus_52238_129
AAAAGATGGTTTAGGGTCTTTGACCAACCTTTGGTTCAGTCATCCAAGAAAATTTGGTCCTGGCTCTCGTTCATGCCGATCCTGCGGAAATCATCACGGAATTGTACGCCAATATCATTTGAATTTGTG
>Locus_52237_106
GGACCCAGTTTAAAGTTAGTCCTCGATAATTTCTATAACAACACCAGTGAATCTTCTACAAATAAATTCCACCAATATTATGATAACTTTTCACATGTATTGTTCC
>Locus_52236_102
TAAGCTTTCTACAATAGTCTTTGGTCGATGCTGCGACCAATCAGGTAAGCGCTATGAAAGGGGCTGTACTGTGTTAATCTTGACATTTTGTTGTGCTATGTT
>Locus_52235_128
GCGGTATAATTTTTCAAACTAAAGCACTGTTATAACGCAACGCGTACGGTTAGCAGTGCAACGTTTCCGCGTTCATGTTGTTACTTAAGATGCGATTATCTTCATTCTATCAAAATTATGTCCCTCTG
>Locus_52234_78
CAAGCTTAACGTGTATGTATCATCGATAAGGAACTACACACACTGGATGACGAACAGCGAAACGACGACAACAACAAC
>Locus_52233_86
AAGTAGTACAAAAGGAGGAGTAAATTTTGGTGCACCTTTTGGACCAAAGTGACGGGCCATGTACCATCTCGCCCACTTACGAAACT
>Locus_52232_109
CAGCTAGACCAGACCCTCTCCGACGTCCCTCTTCACGACCCACTTGCGTTCGGCGTACTTGCCCTTGATGACTCGACCATCAGCAGTGAGGACGACGATTCGATCGAAG
>Locus_52231_104
AAAAGAAGCATCTCTGCTACAACGAGATTGTGCACTTCTTGAGCATCATTGTTGCTTTGAGTCGATGCGATTAATGCGGAACGAGTGTCGAGAATAACCGAATC
>Locus_52230_150
CATTCACTTGAACGCCTTACGAAGGTGCTGGAGAAAATGTATGTTCTGTTGTATCCAATATTTGCTGAGCACTCTTACTGCGTTCGAGTTCTCGTTGTCGTCGAATTTTTTGATCGATCTGAGAACTGAATGTTTGCGGTAATGGAAATC
>Locus_52229_78
GCTGACCAGTGTACAAGAGTAAATTAAAGTAATAATTGTCCTCGCAATGAACGGCGCTCGACTGGTCACATGTTCTCA
>Locus_52228_129
TAAGTAGGGCTAGAGCCATATGGAGGAGCTGAAAGAGCTGTGATTGATGCCGCTCTTGCATTAAAGTCTCGTGGACACGTAGTTGAATTCATAACGGCCCATCATGATGAATCCCACTGTTTTCAAGAA
>Locus_52227_76
GCGGTGGTCGCAACCCCCGGATGGAGTTCCAGTAGAAAGTGTGATTCCAGGTCTGGGCAGCGCTGTTGAAGACAGG
>Locus_52226_83
AAAGACGAAAACGGAGATAATGTCTCTTAATGTCAGATGAGACTTCTTCAATTCTGCGAGCCAAAGTGTTGCGTGACAGGCAA
>Locus_52225_92
CAACCCTTCAAAATTTTCGAGCTTCAGGATACCTCATGAGACGCGATGTTGTTCAAGAGCTGATTGGTGTTCTTTTCGGGACTAGAAGTTAG
>Locus_52224_116
GGCACGACCTCAATCTCACTGAGTTGGCAACACTGATGCTGAGGGTAGAATGGTCATGGCGGATGTCAATTGTTTATAATGCTCTTTATCCTTTGCATTTCAGCATGGCAAAGATT
>Locus_52223_73
AAGCTAGTCGTCTACATAATTTTGAATTGTCATTTTTCGGTAATTTTTTCGCGATTGCCATGAAGATATCATT
>Locus_52222_104
ATTATTCGGTGGAAAAGATCCCTGCGTGTGGACGGGTAGCATTGTCATTGGCATTGTCACATTTCATGATTGAATTGATTGTCTGGGTTTCCACATGTGCAACT
>Locus_52221_72
ACGTGTTAGTAGAGTTCACGACGCAATCAGATCCAAGATCTTCGAAGTTCTCAATGACAAGGTTGGAAAGAA
>Locus_52220_72
TATCACCCGTCAGAGGTTCGTGTGTCGGCCAATCATGTAGCTGGTCAAAGTGCAGGCCAAAATAAGGCGGGC
>Locus_52219_89
GTTTCTAAGGTATTAACCTTGTGAGTGGAATGTTTTCGTCTGAAACTCATCTCATTATCAGTATTACACAGAAAATCTAGAAGTTTCGA
>Locus_52218_89
AAACAAAAACACACCGCTTCAGAGTTTTAAGTCGCGACTGTACAAGACTGGGGCACAGAGCCGTTCCGTTTAGAAGCGCAGCTTGTGGA
>Locus_52217_114
CCATAAATCGTTCTCAGAAGAGCTCGTCGATAGGATATTTCTTATATTTGCCAAAACATTTTTCAAAGTCGTCCATCTGTTTTTTGCAGGTTGGAAATATCGATGCAGCCGTGC
>Locus_52216_101
AAGAAGAAGAAGTAGAAGACACTTCGCTTCATTTTGATTTTGGCGTTGATCTCACGCACGATCTCGGCGAAGCTGTCGTTGACGTTGATCGCTAACTTCGC
>Locus_52215_102
GACCTATCAGTCGGTAGTTGACTGAAGCCGGGAACGCAAGTCGACAGTGGATCTAGGGACACTATTTTCGACAAACCCAAAGATTTTGTCAAAGTGCGACTC
>Locus_52214_120
CTTTGCCTTCCTACCTTTCGTTCTTCTCAATCGAAAGAAAATGTAAAGTTAGAATCAAAATCATCGGAGCTCCACAACTGTACCATGAACCGGTTGACCATCACCGTTAAAGTTCCGGTC
>Locus_52213_94
ACACGAACGTGAACAACCACCTGAAATCTCCTGCTCAATCTTTTCCTTGTCAAACTTGGCATTTGAAGATGCAAAGTCGAATTCTTCAGTGAAG
>Locus_52212_73
GCCTCTTCCCACATGTGACGGGCTTAGACAGAGTAGCCGTAAGCCTGGAGCTTGGCAGCGATGGGGGCGAGGT
>Locus_52211_111
GAAGGCCGCTTACTACAACCTTCGTCTAATGAGAATCCAGATGTCAAGAGAGCAGCTTCGAAGAGGAGCCATACGAGATCCTTGATGGTCTTGTCGTTCTTATCAGCAGCA
>Locus_52210_71
GAGACAATCGTGTGGAGACTATTATGAGAGAAAAACAATGATATATGTAAGCAAATGTTTTTTAATAAAGA
>Locus_52209_134
TATTGGCTTCACTTAAAACGCTAACAGCAAAAGACTAGATGCGAAGGCCAGGCAGAACACCAATGGACCAGCAAGATCGACGTCATCGAGGATGGATGCGTCCGGCTTGGCGAACGGATTCAAAACAGATTTCG
>Locus_52208_134
ACTTGAATTAAAAGGGTGTTCATATCAGTTTTACAGTTCTGTCTCCCGGTACGGCACTGTAATAAACATGATGTCCACGAAGTGGCTGCACGCCTCTTCCATTCCAAGGGTTGTAAACATAAACAGTTGAGTTT
>Locus_52207_84
GATGAGTGGAGGTCCTTATTCCAAGGAGTTGTAAACGATCCTTCAGGGCCGGCCTAAGGGAATAGGAGGCCCTAGGCGAAGTGG
>Locus_52206_75
CATTAAGGACCTTAGAAAAGCTCAAAGTCCATTTTATCCAGCAACTTTTGTGTACTGAACACTCTGAGCAAAGCA
>Locus_52205_96
TGAATGGTTCTCTAGCGACTAAGCCACTCACACGCTACTTCTCCTCATTTCGACGATTCATTCGAAGCAAATCAATGGCTCAACAAGCACCCGAAT
>Locus_52204_77
CAGAATAGATGTAGATAAACCGTCGATTGTGTTCGAAGTTTTGCAATTTCGAGATTATGATGCGAACGTTCTGTGAC
>Locus_52203_101
GACCTGTGAGAAAAGCTACCATCTGCAAGGTGGTTAATTGAGACCTTTTGTCACTGTTAATTGCTCAATGGTTCCCTGCGACTCTACTCAACGTATGATAA
>Locus_52202_87
AAGAGCTTCAGGAGGAGCATGATCATGCCGTCCATGTCGAACATGAGGTCTCCAGAGTTGGCAATAGTCTGGTAGAGGGAGGTCTTG
>Locus_52201_71
ATGTTGAATGGTTCTCTGCGGCGCATTCCGCGGCCCATGCTTGCTTGAACCACCGGCAACGACGATGAGCA
>Locus_52200_160
AATGTAACTAAAATTAATATATTTCTTGTCAGTGTAAATCAGTCACATGTCTTGTTTCATTAAAATCATAATCATAGTTTTTAAAAAGCAACTGAACATAACCAAATTACTTCATACTGAAGCCGATTATAAATAAATTATTTTATTTGTGAGTATTGGA
>Locus_52199_73
AAAAAAAAATTTGCACGAAAAATTCAAGCAACTCTGCTAAGACGTAACTCGTCCTACCCGGTTGCCACCAAAG
>Locus_52198_82
CAGACATGACTTGGTTTACAGGATTTGAATGCAAATTGCAAACTTTTAGAAAATTTTCTCATGATACCAGAGTTTTGTTTTT
>Locus_52197_71
AGAGGAACACGACTTTCGCGAGCACGTCCTTGGCGGGATTCTTGATCTTGAGCAGATAGGCGGACACCAGC
>Locus_52196_105
TAAACTTCATTGTCGCTACAACCCAACAGATGATGTGACAACCGTAGGACCATGTGGTAATGTGACAGCAATACAGCCATGTGATGTGACAGCCATGTTACCAGT
>Locus_52195_76
TTAAAGGTCGAATTGTCTCCCAATGTAAGTTTAAGCCTCATCAAGCATTAAAGAACACTATCAAGGCTTATTTTTT
>Locus_52194_112
AAAAATTACGTTTTAACAGGACCCCGGCAGCTCAGATATTATGTTTAACTTGTCAAAAATTGCTGCCCGGCATGGTTCAGATATCGGTCTTAAGGGGAACATTGCTGACAAC
>Locus_52193_96
TAACTCCTCTTGTTGTGGGATGTGTTCCTCGTCAACATCCGCGCAAACAAGCCCCAGATCAAGCAGGCCGTGAAGGAGCTGTACGACATTGATGCC
>Locus_52192_159
AATCTTGGGATCTGTACCCAGATTTGGCTGGATGAAGTTGGTCTGACAGTGAGAGTTCTTCAGTTCAGAACTCAGGCTTCAGTTGGCCTAGTCTATACAAAAACAATCGGCCATCACCATGTGATGGCTATATGAAACTATAAGTGATGACCGAGTTTT
>Locus_52191_159
GACCGATAAGCACACAACGTATTAAGAGCGTGTGAACATATCAACATGTGCAAGTAATATTATTTCTATACCACAATCGTGTTACTGCGTTGTAATACCATTACAAATCAACGTGTTAACGTTACATTTTAATTTTATAACCACACATGAAACATATCA
>Locus_52190_71
TAGTTGTTTTCGGACGTTTCGGTTGGAGGCAGCACGATGTGAGCGTGTGGATTTCAAGAAAGGCAATTTGT
>Locus_52189_79
GTGTCAGATCGGGGAATCTTCATAATTCTCAGGGTGACTTGTGATATATGTGATATCTGGGAGAGAGATTACCCTGTTA
>Locus_52188_87
GGGCGTTAACGATTCTGGCTTCCTGTGTACAGCCATAAAAACCTGATTCCCTTTTCTTTCAATATTGAACTGTTCTTTTTCAATGTC
>Locus_52187_95
AGAACACGTCTGACAGGATGGGCAGCAGAAAGCCACCAGAGTTATCAGTCGAGTACCAGTTTGATATTCGTTACATAAACACAGAAACATTGCAG
>Locus_52186_123
CCTGGCCTGAGAGCGCAGGAGATGAGGAAAGGTCGCAAAATAGCTGAGGCCTACTTCCGAAAGTACCTAGATGAAATTTCCCCCCAGGGTCTTGTCAAGGAACTGGCCGCAATTATGCAAGAG
>Locus_52185_114
TTTTTTGTAGTCTAGTGGCGAGTCAGTCCTAATGGTTTTTAGGGCTAGTCGTAAAATGGACAGGAATTGATGGTAACGCATAAGCCAGCTGGACTAAAAAAAAAACATCAGATC
>Locus_52184_105
AAAAAAAATGCCAACAATCAAGTCGCTGGCCACATTTGAAGCTAGAAGTTCTGTTGAGCTACATCATCATTTCAACAGGGCGCCCCGTCCTGCCTCCTGCTGCCC
>Locus_52183_74
TTCTTGGTGAACAAGAACGGAGCGTTGTATCTGTCCTGGAAGGACTTCTTGAGGGCCTTACGAACAGCAATGCG
>Locus_52182_81
AGAGGAGCCCACATTCGTTCACGTGTTGAGGCACCAGAAAATGGTTGGTAATGTTGATGGTCAACTCGTTGTCCAAAAAAG
>Locus_52181_123
CCCATTAATCATATGTAGTTTGAAGCTTAAAAACCAAACTTAAAATAACATTAGGCTTATCACCATCAAAGTTTGTTTCATGGATACCTCATTTTCAATTTGTCGTTTTTTTTTAACTTTAAC
>Locus_52180_107
GCACACGTCCGTCATCAACAATAGGACGGGAAGTAGACTTCGAGTCGGAAGTTAGGAGAGTCGCAATGTGCGCGCATCGATACGGCCCCACTGCAGTCTGGAAGCGG
>Locus_52179_93
AAGTTCTAGTGCAACACGTACCACGCAGGAAGTGAGGAGTGATCAATCAAGAGATAATAGAGGAGGAATGCCCCGTAACGACCTCCAGGAATA
>Locus_52178_104
GGCACTTACCCTCCTATCTGCAAGTAAATCAAGTGCTGGAACTAGAACGGGAGTCTACAGGCACTGCCCGTTATAATGCTTTAGACAAGTGGACTTGTCAGTTA
>Locus_52177_71
GATATAATCGTTGTGTGTTATTGATATGTATCCTGTTAGGAGGGGAGATCAACCAGCAATTTTTGTACAAG
>Locus_52176_177
AAAAGAAAATCAAATAATTAGGGTGGTTAGTGCAATAATTTTATTATTGTAAGCAAGTAGATGGTTTTCTTTTTTCCATTATGTGTGAAAGCTTCAACGCAGCAACGTCTTCGGAAAAAGAACCCGCTGCCCTGACGGTGGGAAAGATCAGAGCAGTTCCCTTTGATCCTCTTTCGT
>Locus_52175_71
ACTGTACCCAAGTCCTGAAGTTTATACCGTCAAGACGTTTGCCAATGCTTTCCACATTCTGGCGTATTATT
>Locus_52174_87
GCCCGGGAGCTGACACAGGACAGGGTTGCCATACAAACGACACCCGGTATCCTTTCTCGTGACAAACTGTGTAAGTAGCTCCGTGTG
>Locus_52173_142
AAAATTTTTTACTTTCAAAAGCTCTGTGTAAAGATCAGCATGAAAGATCCAAACTGGCAGCCCGTGAATCGGTGAATCTCTACAAATTTGTTATATTTCTGAGCATGCAGCAACTCTACAGAATGTCACTGAGGACTTCGTT
>Locus_52172_110
CACCGTCACGTCCCCCACAATACTGAATGATGTGTAAATGTGTTAGCACCAATGACACACGTTTCTGTTTCTGGCGGTGGATAAAACCAATCAATGATGTGTTGAAATCC
>Locus_52171_112
ACTGTTAGACGATTGTAAAGTGGTCAGGATTGATGGTCCTCTTCTTATAATCCTGCCGACCTTATCAGTTACTGGTCTCCCCCTTGACCCTGATCAGTTTGACCCCCCCCCC
>Locus_52170_130
CTAGAGCGGTTTACTGACCCTATCACGACTGATTCAAACATTGTCACAAATTAGCGTCTATATTGCTAATAATTTAATACGTTGTTAGTGGTATTCTTGCTAGTGTATAGCCGTGGTTGTACCAAACTCC
>Locus_52169_83
TTATTGAACGGACAACAAAACAACTTAATTGATATATATTCATTGGATTTATAGAAATATATATGTATAAAGTTGTTTTTTTT
>Locus_52168_72
GCTTAATCTGCTGTTTTCAGTCGGATTGAAATCCGAATGTGCAGATGTGGCTATGACATATCAATCCAGTCA
>Locus_52167_84
GCGGCAACTTCAACGTTATCCTGGACAGGTCGCACTTGACGTCGGACATGTTGGTGAGAGGGACGTTGATATCGAGACCGGCTT
>Locus_52166_104
ATATTGCAATGAGATGTTTGTGTTTAGTAACATCTTATCTTCAAGACTTGTCTGTACAAAGGTGCATGCCACTCCAATTCGACAGCTGGTGACACCCAGTGGGT
>Locus_52165_71
CAATCAAAATTACCAACTTTTTAGTGGATTATTATTATTACATTTTCGTCCTTTTTTATAACTTCTGCGGA
>Locus_52164_108
ATTATAAGCTAGGAATGCGTAATTGGTTGAAATGTCAGCTGCTGCTATTGCTCCTTCCGTGAATGCACCATTATACTTCCTCTGCTTCGACTCGAGACTCGAGGATTG
>Locus_52163_85
AGTCCCCCTCATGGTCACAGATCTTTGCGAGTAGTACGAGGAGTAGTAGTTGGCACAGTGCAACAATAACGGCAACAAGCAATAG
>Locus_52162_140
AATATGACATGGACATCGTGTTATAAGTCTTAATATGAATCTATTTTCATCACTACATGGCATAGTAAGCCTAAACTTGACCGTTTTAGTGTTTTGTTTATTGATAGTAGATAATGAATCTACCCTTTCTAAAAGTCAAA
>Locus_52161_125
AACGAGTTGGTGGGGAAGCGTCACTACTCCGAATTCTTGTCCGCCCCTAAGGTCGAGAAGTACCACCGTGAGGAACGTGATCGCGAACAACGCGGTGAACGCCCTGAGGGGGGCCGCGGGGGGGT
>Locus_52160_95
CCTCTTCAAGGAGACAGTCACGGTCCCAGAGCAGATCATCGAGTTCTTCACAGCGCTCGAGCAGCAGCCGGTCATCAGGCAGAGGAAGAAAGTTG
>Locus_52159_182
AGCTCCTTCTCCTGGTTATAGAGAAGCAGCTAAAGTTCATTAATAACATGGCAACTCCGATGGCGAGCAAAAAGCTCACTAAACGCCTGTTAAAGCTCGTCAAAAAAGCGGCGCCGAATAAGACATTCGTTCGACATGGCTTAAAAGAGGTGCAAAAGTATATTAGACGAGGCGAAAAAGGG
>Locus_52158_192
GTGTAGAAGAACGTGACGAAAGCAGGACCCACCAAGAAACCGGTCGAGCACAACATGGTAATATTTCCCAGTGTGTAGCAGACAGCAAAGGCAGTGAATTTGAGAAAAAAGATCATAATCGCACCGATCAAGCTAAGCAGCAGTCCAATACCGGCACAAATTGCGAAACCGTATATCCTCTGCTTGAAAGAG
>Locus_52157_130
ATTTTTTAACCTGTATAGTTGAATCACAGGGCAGGGTCAAAATCCCTTGGTCATACGCTAAACTTCAAGTCAATCAATCTGCATTCAAATCAAAAAGATTATGTCTGAACCATTCTTCGTGGCATAATGG
>Locus_52156_110
TTACTGATAGTGGACGGTTCGAGTTGTTGCCATGAGTAATCCCAACAAAGACGTCATCGATGTGCTCAACGACCTGATCGAGTACAGCAAGGACGGCGAGAAAGGCTTCA
>Locus_52155_112
AAGATTGGAAAGGTTGGGTTACCATGCCCAACATTCCTCTTGTCCTCACTCCTGACCACTTCTGGGTCGTTGCCGCCATCGGCGCCATCTGGGTTCAGGGATTTGTCCTGGG
>Locus_52154_102
GGGGTCAAGAGAGTCACAAATGTCACTTGTTTCTTCTAACAGCACAGCATGTAGATCCACATCTTGTCCTGCTCTGGCCATCTCAACCAGTTTGCTTAAAAA
>Locus_52153_91
AAAAAATTATTAAAAGAAATCTGGGTCCAACGTTTAGATGTTGTTAGCCAACGAGAGTCGGTAGAAACTGAGGGAACTGAGGCCGATAGAG
>Locus_52152_127
CAACACAACTCTCGTACACACTCATGTATCAACAGAAACAAATCTCTTTTCCTCACAGCCCACTTTGACCCTTCCCAGTTTCCTGCTGCACACCACAAAATTGTTACATGAAGAAAGTAAGATTTCC
>Locus_52151_118
AAGCTAAGAAAGAAGAAGCGTGCTGGTTCATCTTCAACGGCACCACCTGTACGTGTGAGAAGATTTTCTTTTTCACTCAAGATGATTTCAATATGACATGGTGATGATTGATAGGGAT
>Locus_52150_130
GCTTGTCTACGGACTTTTACCTGAGCAGGAAGAGAAAAGATGGAGCAAGCGTACACAGCAAATGCAGCAGATATTTGAACAGGCCTTCACTTTCTCAGACACCCTTAGCTTCAAAGAGATGGCTCGTAAC
>Locus_52149_97
AATGGGGTGTGGGAGTTGGTACGGTTTGTGATAACAAGAAGAAATAAAATGCTTCAGCTTACGTGCATGCACTCATGACTACCAAGCTAATACTGTG
>Locus_52148_136
CGCCCAAACTCATTGGCTAAATTAGTTATGTAGGCCTTCCCAAGTCTTTACTTTGGAATTGGGTCGACTCCTTGGGCGATAGCGCCACCCAGACCGAACTGCGGACCACTGTTGGCAACTGGCTCTTCGTCGGTGT
>Locus_52147_91
CTGGCTGACAGGAGGACCGTCGTACAGATTCATCCACTGTCCAACAAACGACCATCCCGGCTCGTGTCAATGCCTTTGTCGTCAATATGCC
>Locus_52146_213
AAAAAGTTGGTTCTTCTCGTGTTTATTGCCAATTTTAACAGTTTATTTGCCAGTTCGGCTCTTCATTTCTCTGGCCTCCTGAGCGATGGCACAGCAAGCGCACAAGCAATGGCAAAGGAAATCTTCACAAGCATTACCAGGGATATCGTATTTGGCACGAATATCTCCTCGCTTGAGGCAACCAAGAATGCATTGCAGGCCAGCCAAAAAGGA
>Locus_52145_101
CAAACGAACTCGTAAAACCTAAGCATTTGATTGCAAGCTGCAGCGTATGGATTTGATAGAAGTACTTGTTGTTTGGCAAAGGCAGAGCCCAGTTCAGCTGC
>Locus_52144_85
AAGGCTAGAAAAACTGTCACCTGTTAAGAAGATACATGGAAAATATACTTTGCCAAGTTTTGTATCCCAAAATCTGAGATCGGAA
>Locus_52143_138
CCTTGTTCAAGGGCCGAGTGGGATTCGTCGTGTTCCCGGGGGCCGGTCCCATCCAGACCAAGCCACTTGTGTGTCCACGTGACGAGTACCTGGACAAGCTCAGGAGCGTCAACACGTCACCGATCCAGGACAGAAGAG
>Locus_52142_113
GGACAGCGCTGGGTCCGAGTGATGGCGGAAGTCGAGTGGAAGGTGACACATACTTTACCCCGAGCCAAACCTTGGAAGAAGCTCATCGCCCATTGGCCCATACCACCGGAACC
>Locus_52141_72
TAAGTCGCACAATTACTGTTGTGCTTGCTTGCTAGAGAGGGACTCATTGCGAGTCTCCTCGGGCACGAGCGC
>Locus_52140_120
AGTCTGGACTACCCCCCGCGGGCTCTAAGACGGGAAGGTTCTGTAAGTCTAGAGACAGGGGCTCGGGTACGTTTGTCTTGAGACAACTCTTGGTGTGTCTCTTCAAGTGGTTGGTCTTTA
>Locus_52139_93
CCCATTATATGAGGACTCGGAAACCAGGGCAAGCACGACTCCGTTCAGAAGAAGGTTCCAAAACCCAACACTCCAAACGCAAACCCGCTCACA
>Locus_52138_99
GGACCATTCCCATAGAGGGTAAGTGCCCTCCCCTACAAGCGAACTCCCCCAAGCTGGTTGAAGATCACCCCTGAGGAAGTCAACGAGCACGTTTGCAAG
>Locus_52137_126
GTCGTTCGTCACACTGATTAAGTCCAGAGACGCACGAGTCTGTGGAAACAATCTTTGCTAGTGACCAAGCCAAACTGCTGAATCCAGTGTCCAGTAACTTGCCCATGCTGGTCAAATCGGGCTCTA
>Locus_52136_123
CACCCTTTAAAGTACGACCCCCTTCTGTTGAGAGGCAGCAACTATTGGTGCGCAAGGCTCCTTGTTGTGACTTGCATTTGAAACAAGGGTGTCATTGTTTTGTGGTCCCTTTGCAGGACCAGC
>Locus_52135_111
ACATGGTTTTCCTCGTCCCCGAGTAGAATATCAAGTTCATGAAATTGCTGGTTATCTTCGAGGACTGTTGGAGTCCATCAAGATTCATTGCTATCAGGGCAAGAAAGCCAA
>Locus_52134_109
CGTACCCTGAGCAACCAGAGTGAAGCTGCAGCATTCCCATTACTATCCACCTCTGTGTTCTCAGCTTTAAACTTTTCCCACAACACTTTTATGAGGTCCATGAGAATGA
>Locus_52133_103
GAGAAGGATAGAGAGACGAATCACTTTTTCTCGTTCTTCTTCTTGTCTGCGTCTCTGTTCTTCCATCACTTCCTCAAAAGTTTTCTCTCTCATTGACACAGCA
>Locus_52132_90
CGGCACTAGTAACAACAACGTCTCGGAGTCGTGACCGCGTTTGCGTGATTCGCCTTCGCTCTTCTTTCCACTGCTGCTCGCCGACTGACC
>Locus_52131_101
TGAACTTGACTGGCGGGACACACAATTCGGCGTTTCGGTTCGTTTCTCATTTTTCAGATTAATCCGAAATTTTCTAGCGAATGGTGATGTAGCTTGTAGGC
>Locus_52130_238
GTCTATTTAGTTGTATGTTTCCAAATGGATCAGCTAATGGAATTGGAAAATTTCGTTGTTCTTGTCCACCAGCAATGAGAATACCCTTTCGTGCATCTTTTACCCATTTAATAATACGATGATTAGCCCAATCTGAAACATAGATCGATTGATCTTTGTCAACAACGATATACGTTGGAAGACTCAATTGATGAACACGTGCACCTTTGCCATTACCACCAGCCACAACTGTACCGAT
>Locus_52129_83
TGTTGTCCTAGTAGTTGTAGAGGCTCTTCAACATCAGGATCTTCAACAACTTCGGGATCATCAACAACAGGATCATCAACATC
>Locus_52128_88
GTTTTGATGTGTCTGTCGGCTTGAGAACTGTTGAAACTTCGAATCTAATCAATGCTGAAAAGTTTTTGAAGCCTCGTTTAGTTATCAG
>Locus_52127_108
ACAAGTGTAACGTTGAGCGCGACAATTTATCAAATTAAAATTTTCGTTTGAAATATCTGTTGTGAAATACGTTTAACACAAAAAGGTTTTAGAAGAAATATCTGTCAA
>Locus_52126_88
CGACTCCAAAGACCTTGGTGCGATGCCGCACCAGCAACAGTATCGACATCATCACCAACAACACCGTCAGAAAAAGATAGGCGGGGAG
>Locus_52125_92
TTCTTATAACGCTTGTCACATGATGCGATTACACAACTTTGCTTAACTCCGCTGTTGACTGGAAAGGCCTCTGAGACGAGCCTGAATGTCAA
>Locus_52124_161
GTTTATGGGTAATCAGTGTTCGTGTAACGAAAAGCTTGGGAGATAATCATACAAAATGTTTTGATACATATAATTAAAGGTATCATTTCTTTAAAAATGTATCAGTAAATTTTGTTATGCTTATAATTTTCTGCCAGCACTATGAATACGTCTTCTGAAAA
>Locus_52123_111
TTGTCCCATTATGTTAGGAAGCAATTCTCTTGCCCCTATAACGTTGCTGACTTCCAATTCGTGAGAGGCAAACGGGATAGTGCTCTGTCCTTCGCTACCATTGACTCGATG
>Locus_52122_136
AAAAAAAATTGAGAAATTACGAACATTCACCACAATATTAAACCGAGCCAATGGAGAAGTGGAGTTATTGAAGCAAAGACTTGAACATTTCTACAACAAGTATTTGTTGACTTTAAAAATTGCACAAGGAGATATA
>Locus_52121_246
TTATTCGACGGTTTTGGCGTTATGACTGTCAACAAGTCCTGTCATTATCCAGCAGATAACATATCTCAATGTCAATGTTCAGCAGGCAGCTTGTCCCCACCTCAACACAAGTCAAAGCACTCAAACGATATTATCAAACATTTAAAACTAAAGTATAGGACAACCACACCTTTGCTGAGACACAGAACTATTAATGGCAAAAGACTGATGTTAGGTAGAGAACGGTGCAGGAGAAGACTGTTGCCT
>Locus_52120_85
GAGAAGGCTAGACGTGAGTCGGATTGCGCACGGCACTACCGTTCTCCAAAATACACCACATCATGAGGCAGCGTCAGATCGGAAG
>Locus_52119_80
GATTCTAGAAGCTTCGTCTTGCAGCTAGCCAAAATCCAGCCCCTGCAGCCTCCACAGTAGAGTCACTCACGAGTTACGCC
>Locus_52118_95
CCCATTATCCTAAGGTGACGAACTCAAGAGGACGTCATTGTATTCATACATCCTCGGCCTGGCCTCCATACGGGTCGATATCAATATTCACCATC
>Locus_52117_92
GGAGTTGGTCCAATAAGTATCCCACCACCACACCCAGAACAAGCTTATCCATATCCACCACATGCTTATCCACCTCAACCAGGTTATTCATA
>Locus_52116_114
AAACATGACCACTACAAATATTTATTTGCAATGTTTGACAAAGTATTGTTTTAATGATTGAACAGTTCATCTGCATAGACAAAGATAGTGAGGCTCATAAAAAAAAAAATCAAA
>Locus_52115_121
TTCTTCTGCTTCTCTTTTTTCACGAGTATCTGCTGGTGGAATTCATTCATTGGTTTACATTTGTTTTCCCTTTCTTGCTGCCGAGCGTAAAACCCGATTTACTCTGTGGCTTTTTTTATTT
>Locus_52114_110
GCTCTGTTCTGGAATGTTAGAAGGGGCAAGACTTACTGCCTATGAATTAGTACATGAGAAGATGGATGCATCTCTTATTTGTGACAGCATGGTTGCTGCTTGTATGGCTT
>Locus_52113_73
CCGCCTTAAAATGATGGGCCCTAATCTCAAGACAACGGGTACCCGGTCCCGGATACCCGTTGACAGGCCTACT
>Locus_52112_93
AAAAAAAAAAAAGTCCACCAACTCTTCATGAGTCATCGGTCTCAATCGTTCGATCCATGTCTCAAAGTCTACGCCCCCCACCCCCCAGTGCCC
>Locus_52111_72
AAGTTGACGTAGCGACGAAGGTAAATCGACACGCCGCCGATGGCGAAGACGTTCTCCACGTCGGGACTGTCC
>Locus_52110_98
AAACCATAAACAAAAGTCCTCTAATAGGCGCAGGCTTCGTGATGACATTCGTCGTCCAAGTTCTTTTGTTGGCTTTTGACTTTTGGACTGTGAAAAAC
>Locus_52109_121
ACAGTGTGTCGACACTCTGTTGCTTGAAAAGATAACCTCATTGCTTGGTCTTGTATTGTTCTAACCCTTTCAAAACAAAGGACTGCAATCTCAAGTATGGAGTTTTGATTGCAATGTTAAT
>Locus_52108_143
AGTAGTGTTAGTTGTTCTTTTTGATTGAGACCCGTTTGAATATCGATTAATTTCGGTACGGATTTTGGCATTGGTCGGGAAAGAATCTTTGTCGTTGAAGGACTTTTGACAACATTATAATCATTGAAAACAACAGTCGGTGG
>Locus_52107_95
GATCAACTCGTTTATGGATTCGTTTACACAAGTGTCCACATTGAAACAGCCAGAAACGCAAGAGATGAGATCATCAAACAATTCGACGCTCCTGT
>Locus_52106_102
ACGACCTAAGTTCTAGCAGTACAAAGTCTCAAAGATGGGAAAAGAAATCAAAGATGTTGAAATGCTCGGAAGTTACCCTCCATCCAACGATTTCAAATCTGT
>Locus_52105_93
CCCAGTTCTTCGTGTCCCTTGGAGCAGGTTATGTGGGCGGCTTGACGAATGTGAAATTCTCAAACTCAGCGGTCTTCTGCTGCGAGCTGGTCA
>Locus_52104_84
CCCATTACTGAAAATTGGAAGGCACTTCGGCGTCCATATCGACACTTGAATTTTGAAGGATCAGCTGTTAACATTGGGTTGGTC
>Locus_52103_117
ATTGTCCCATTACAGAACAGACTCTCGCCTACCGCAGCAATGGCAGCAAAGGCTAAGCTCGACGCTTTCCTCAAGCAGCTCGATGACCAGCTCTCCCAAGTCGCTATCCTTAACAAG
>Locus_52102_93
TCTCGCAACAAATCCTCGTGAAGACAAGATCGTTGTTTAGGATCACAAGACCATAGCGTTGTTTAGAAGCACAAGACAAGAGCGTTGTTTAGG
>Locus_52101_146
GTTGGAGAAGACCGTCACACCAAGATTTGGCCTGAACCTCTGTGGATAGCGTCAGTGTGGAGAGTAACGTCAGTCAAGTTGTATCTAACACCACGACATGTTTCGTTACAGAGTAGACCTTCTCTAGCAGCAATTTGGAAACCAGA
>Locus_52100_74
CGTTTTGTTCGAGGAGATAACAAGCACTTACTTAAAACAAACTCAGATCCCGCACATCATTCAGAATTAAACAA
>Locus_52099_76
TGCTCTATAATGAGGGGATGATGGAGAGTAACGTTAGAATCAGCAGAACTCGCAGAACCCAGTAGCATCCAGAGGG
>Locus_52098_200
AAATAACGAACAAAACACTAATGTTCAATTTCGTTCTCCGATATCACATCATAATGCATAACAATATCCGGTGATCTGTGGAGCTCTTCTGCCTTGTATCTCAAATACGGCCATTTGTATTTCCATAAGCAAAGAAGGGTTTCAGACAATCTACTCGTCTGGGGCTGTAAGCTTCTCTGACAAAGGATCTTGTAGTGTTT
>Locus_52097_83
GGGGGGGTGTGAGCTACTCCTTCTGTCGTGCCTACCTCTGCCAGACGGTCGGAAGTACTCTCCCCTGCCGAGCGATAGAGCTA
>Locus_52096_125
GATCTTGTACGGTTACTGTCGGGAAAGAAGTTCTCAGCCAGTAGATCCTGCTGCCAAAGTGTGCAAGGAAATAGTTCGATGTGTCAACTTTGCTGCTCTAAAACATAAAGATCAGCGAAGAAAAG
>Locus_52095_103
TATTGTCCCATTAGCCGTTGTCCAGCATGGACGTCCCGCCTTCACCCCCGACGCTGGACACTTTCAGCAGCGACTTCAACATGAACCGCATCGAGAGTCAGGC
>Locus_52094_113
TTTACCCATAAAACAACAACGAGAGCTGGATCTGGTTCAACACGATATTTCAATAGACGACGAAACATCAAGACAAATGGTTCAGGTTTATGAATAAGATAATGTTCCCAATG
>Locus_52093_83
AACTTTCCAACTTTGAAGTTGCAGACCTTTAATCCCTGAAGCCGTAACGCCAAAACGTTGTCAAAGCATCATGACCAAGATGT
>Locus_52092_130
CGACTTTGTTGAATATTAACCCCACACATCGCCTTCGATACATTTGTTATAATTCTTGCATAGCCCAGCGCCACACACATCCAGCCTGGCACACCACATTCAGTAACTCAAGATTTGTTTTGCACACACA
>Locus_52091_483
TAAATAAGATTATTATGTGAGGTTTTTAACTATTATTCAGTTTAGTTAAGCTAAGAATGCCAATATACAAAGTGAATGTGAAATGGGGCAAAGAAAAGTTTTCAGATGTGGAGTGCAATACAGAAGAGTCACCGGAACTGTTTAAAGCTCAATTGTTTGCTTTATCTGGTGTTCATCCATCCAGACAGAAGGTCATGGTCACTGGAGCTATCCTGAAAGATGATGACTGGGGCCCTGCAAAAAGTAAATTGAAAGATGGTGTCATGTTGTTAATGATGGGAACTGCTGAAGAGCTCCCTGAGGCTCCAGCTAGCAAGCCAGTATTTGTTGAAGATATGAGTGAACAGCAGCTTGCATCTGCTCTTGATGTACCAGCTGGTTTAACTAATCTTGGAAATACCTGCTACATGAATGCTACAATCCAGTGTCTGCGAGCGGTACCAGAATTAAAAGATGCTTTAAAAAGTTTCAGTGGAGGGTGCA
>Locus_52090_103
GTCGAAGAAATGTCTCCACAAGCCAAATATTACTCACTTCATGATTTTATTTCCACTTATAAGTCAATACATCCAGCTGTTATTGTTCAAATAGTCACCTGCA
>Locus_52089_167
GTTGAATGGTTCTCTACAGTCACAACCTCATTCGTCCTCTGACCTCTTTCCCTTCACAATCGTTTTATTCTGGGAAAACCGGTCGCTTACTTCTTGCTCTTCAACTTCTTGACGTAGAAGTCCAGTTCGCGACCCTCAAGAACGTAACCGTCAGCCCGGCCGGACTG
>Locus_52088_73
AAGGCTAGAGAAATTTGGCTAGTTATAGATCGAAAGGTAGGTCTGTATAAACATAAGGCATTTTATCTTGTAA
>Locus_52087_127
GAGCTAACGGAACTGGCACGTGACCTTAACTCTCGGCGCGTTTTTCGTGTTCGTCGGCCAATTCAAAGTGACGCCGAAGTTCTTTCCTGAGATTCACGAAGACATGAGACGCGAATTCGGTCGGGTG
>Locus_52086_104
GAATCGCAGTTCACCATTCTGATACACGGACTCAACTTTCGATGCAGCAAAAGAAGCTCGTGATAAACTGATGATAGAGGCCAAAGAACCCATGATACGAGAGG
>Locus_52085_96
AACACCTTTTAGTTGTAAAACTGTTGTCACAAGTGCTGTTATACTTTTGGATGATGGCAGCAGTCAAGCGAGTGTAAAATTTTGGGGTCCTAATCT
>Locus_52084_74
GGAGTCAGTACAAAACTACTGTGTTTATGTTTCATCTAGTTGTGACCTAGTGACGTCAGAGTACTTAGGTTATT
>Locus_52083_113
GAAAAGATATAAAGACTGCGATCTTGCGGTTTGAAGTGTGTCGGAATATCGTGGCACGTGGGGCAAACCCAGACGGCCCAGATGAACAACAACACAGAGTATCTGTTCAGAAA
>Locus_52082_101
TTGGTACAACGTCGGACAAATCTCATTAAAATCAAGTTATCTCCCTTGGGTCGCGGCATCAAGTAATTCCACCAAGGCCATCCTGTTGTTTTCGCTGAGGA
>Locus_52081_95
GTGTCTACGTAGAAGCTACTAAGTCCTGCACTGAACACCTATCTAAGGAACAAGTTTGTGCTGCAGCTCCGTAGCGCCTGCGGCACCCCCTTTTT
>Locus_52080_87
AACGTATACCAGTACTGTAATCAAATGTGATGACACTGTAGCCAGCCAATGGCAGGTGAAATGTTAAAGATCGGAAAAGCGTCGTGT
>Locus_52079_103
TAAAAGTGACTGTTGGGAAGGAGACAAGATGCTCCTGAAATACTACTGCCTTCTCCTCGTCGTCGGCCTGATCTCATCCGTGTCGTCGCGAAGCATCGCGTGG
>Locus_52078_97
TGCGACCGCTTCCACTTTCACGCCGAAGTGCAAGGCTACGAATGGGGTACAAACGTGAGCAAGGAGAATCTGGGCCGCGGTTACACGCACTGCTTCG
>Locus_52077_158
AAAAAAAAAGTTGGGGTTCAACAGCGCTGACAGCAACATCTACAAATTCAACAGCAATGCCTTCGTTGGTATTGAGATCTGGCAAGTCAAGGCTGGTACCATCTTCGACAACTTCCTTGTGACTGATGACGTCAACTTGGCAAGCACTCGTGCTGAGG
>Locus_52076_80
AGTCGTGGCGTCTCACTAAAGGTCACACCAACGTCTTGTCTATCTTTCTTTGAGCCATACAATGATAAGAAAGGCTATGT
>Locus_52075_77
TTTATCAAGTCTCCCGAATCGGTATCATAGTTACTGGAACATTATCCCCTGGCTTGTCCTATTCCAAAAGATCGGAA
>Locus_52074_85
CATAGAAGCTTCATAAAGTGCGAACTGCAGTAACGATCAAATTTGCCTGTTGAACGATCAATACGTTCCATTTGTTTTTCGTAAT
>Locus_52073_78
AGAACCGACATGAAGTTCCATTAATATCAATCCTAGAGTGCGAGCTCGTATTTACTCATTTTATGAGATCAATTATAT
>Locus_52072_80
CCACGAAACCAGGACTCTGGACTGGTGCTAACCTTTTGGTCGATATGACTAAGGGAGTCCAATTCATGAATGAAATCAAG
>Locus_52071_94
GAGGAACTGGTCCTGGTTCTGCGGGAACAGGCTTAATAACCACTTGGTAGTCCGTTTGGCCGGGAGCTCCAACGGCAGGGATGTCAAAACATCG
>Locus_52070_145
TCTTTTTTCCCACCACCAGGTCAAGGGGGGATGGCTGGGGGTGGTAGCCCTAACATGTTTCAGTCTGCAGCAAATCTCAATGAACGTCTAATGTTAGAGCGCCGCCGAGAAGCTGCAAGGGAAGAGCTCAATGATATCAAACGAA
>Locus_52069_91
TCGGAGTAGTACGTCCGTAGGGTATAAAGTCGTTTTCCAAATGCATTTGGGGTTTCTCTATCCATATCTCAGGCAAGTGCGTGACTTTCTA
>Locus_52068_161
AGTTTGTTATTAATCACAGACTAGTTTTCACATTAACTGTAACAATAAATCATTTCATTTGCTGTTGAAAAATTATATTACCGCATAATATGTGTTTAAAATGCAACCTGTCTCAATAGTATCATATATTGTCAACATTAATACCTCTTTATAATATGTCT
>Locus_52067_71
TTAACGGGGAGATTGACTTCACCCTATTGCTCTAAGTACTTAGGTCACATTTTTGTCAAGTTCAATCTAAA
>Locus_52066_99
AGGAACATTGGTTTCCAGGTAACACAATACCAGTTAACTTGGAAACGTCAAAGCCACCTGGGGAATCAACCAGCTTCTCCTCTGCGATAACATCACTCT
>Locus_52065_199
CGGACAGTTACAAGGTATGTAAGGAATATTATGAAAAGAACTTCTGCTATGCTCTTGACGAGATTCCAGCCAAAGTCTGTGATGCCCGGATTGTTTCTATTGGCTACGCAGTTCCATTGGCCTGGCTTGGAGTTGTAACATGTTCACTGTCATGTTTTGTTTGGTTATGTGTGTCACGAGCCTTGCGAGTCATTCGAGC
>Locus_52064_116
TCGTACCTCTTAAATCTTTGAGACCACACCACACAAGAGGTTGACGTCACTGGAGAGTGCGATGCTGAGTTCAATGTGAGCAAGTCCTGGGGAGCCTGGAACAAGGATGTCACAGT
>Locus_52063_107
TCCAAAATAACACCATCAAAGTGTTGCGACATCCAAGGAAAACTGTCACTTAAACTACGGCTACCTCAGGGTCACAGAACTATCCCTCACGCAGCATGCCGGCCAAC
>Locus_52062_88
ATCTCAAATTTTACAACTATTTATGTTGGTTTTCCTGGTCTTATGAATTCTAAGAATATTTAAAACATCCTTGTGATATTTTACTATT
>Locus_52061_81
TTGTCTATGTAATTCCCAACTTAGACTAATGGTCATTAATGGATGTCAAACATTTGACAATGTTTGCAAATATTGTTTTGG
>Locus_52060_103
GGGGGAGGGTGTGTGTGTGTAAGTGATCTTTGGAGAACAAAGAGTCAACCCATGTAGAAACACCTCCATTGTGGACTGTTTTTAAACACCTCCATTGTGGACT
>Locus_52059_174
CGGTCAGCTTTTGCTCCTCGTGTGATAAACCTTGCCTCCATGATCGGGTTATTCCCAGCACACCACTACAATATCTACTCTGCCTCCAAGGCCTTCGTGGATATGCTCAGCAGGTGTCTCTCTCGCGAGTACAACAACGTGGATGTGATGAGTCTGTGTCCCAGTGAAGTGTCG
>Locus_52058_101
CTATGGCCATAACTTTCTTGCAAGAGTCCTATAATTAACATGTACTGACACGATACAGCGTGCCATGTGCTATGACATTGTTTTTTAGTTATTGGCCGATT
>Locus_52057_75
TGTTACTACGAAAATTGAAGTACCAAGAACACAGTGGCAAGAGCTTTATGAATTCCCTGATGAACTATGTAACAA
>Locus_52056_105
GAGGTCACGTAGAGAGTTTAAAATCCAATACGTCATCACAGGTTGTTTCAAAGTGAGTTGTAGCATCATAAGATTTAGAGATGAAAATCTTGCTCTCTTTGCCAT
>Locus_52055_189
CTGTTGTACGAAATCTACCCACATGGACAAGGCTGACCAGATTTCTTGGTCAAGGTAAGCTCCACTAGGATCTAAATTCATTCTCAGAGTGCCAGATAGGAGCACTGGATCTTGTGGTAGAATAGTCAACCTTGACCTAAGATCATAAAGGCCAACAACTGATATATTGATGTTGTCAATGATGATCTC
>Locus_52054_95
GTAACAAAGAAATCAATTTCTTACTTTATTGAAAACAAGAATACGATGTTTTAACGTTACAGGCATACTTCAGAAAGATCCTCGTTTATTGAAGC
>Locus_52053_89
AATGGTTCTCTATAGCTGTTTGAATACATTAGAGAGTGAAAATGATCGACATGCTGCTGAATTAGCAGCAAAAGTCTCTCGATTGAAAA
>Locus_52052_73
AAATTCAAAATCTTTACTGTATTTTGAATACAAGTAAATCTGTACTCAAACACTTAAGACAGACATTCTTTCA
>Locus_52051_158
AAAAAAAAAACCATTTGCCCGTGCTCCAAGGTTTGTAGATAAACGGTGCGCCCCGAGATTTGTCGGCAAAAGGGATATGTACGAGCTAGATGGGCTATTTGACCCCAGAGGAGTTTCGGACGACGGCGGGGATGAGGAGACCTTATCGGGGCAATACG
>Locus_52050_85
CTTTCTCGTACACTAAAATTCTTTGACTTTTCTAAGTTGGAAATACATTTTTTGATATTAAGTTGCTTTATTATGAACAAGTTGG
>Locus_52049_73
GGAGAGATGTAGTTGTTGTGAACAATGATTTATTAAACCGGTTAAGACCAGGGGATCTGGTAAAATTCGATCG
>Locus_52048_78
GTTAAAAGTTGGTACCTGAGAATGGATAGTATCATCTCAAAGACTCATTCATCTTTCCTGAGATTGTATGTGCTACTG
>Locus_52047_73
TTTACTTTTCAATTGACTTTTAGTTTGCATGTAAAGACAAGCTCAATATTAATAACACGGAAGAGACAAATAT
>Locus_52046_94
GTCAAAGGGATTGAGCTTTTGTCCGTAAGCAGATTTCCCCCCACCATTGAGTTGAACTTAGATAGGTCTGACTTTATTAGCAACACGCCAATAC
>Locus_52045_218
ACCTTTACCTAGCTAATCTTAACCTATATTTACAACTATCTATCTGAATAGAATCAACCAGGTGTGAGTCTTGCACCGATTCTGACTCTTCCTACAATCTGTTCGACAGTTACAACAACTACAAGAGAAAGTACTGCCCCTTTGGTTGTTGCGGGACTAGCGACCACCAGCACTGTTGTTACAACGGTGGTGTCATAGCCGCCGTCATTGTGGGTTTT
>Locus_52044_116
CAGGCCAGGAGGAGGGACCCGTCAGATTCTTTGATGTAGAAGTTGACGATGAGATGGACCAGGCCGTACACAGTGTACAGGGCCAGCAGAACTCTGATGGTCACGAATAGGGGGCG
>Locus_52043_151
GATAACTCTCGGGACTTGTGGCGAATCGCAAGATTGTCTACATCCACTTCGCTCGCAACGCCTCAGTCCATGCATTCCACACTCACCTCAAATCCATCGTTGCCAAACACCCCAACGTGCAATACTACTTCGCCTACGAGTCTGCTCCTCA
>Locus_52042_101
GGCTCTGGTTTGTTGTATTTGGGAAGTTGCAAAGACGAATACGCTGACTGGGAGAGCTGGAAAGAGACACAAATTTGATCATCTCCTGTAGGTGTGGTACT
>Locus_52041_73
GAAGGCTAGACAATGATGTCCGGATTGAAATGCAGATGGATCTTTCAAGTATGCTTTGACAGGGATGGATTGT
>Locus_52040_92
AACCCCGCCTGCTAAACCACTTCAACGCCTTTGTCCAACTGCAAGGTCAGCCATCTTTGTTCGGACAAGCCCACAAAGCGGACAATGACAAT
>Locus_52039_111
CACCTGGACATTGTTGTTGACAAGTAACCATTCCAACCGAATTGGCCGGGATTGTCATTGGTGCAAAAGGTTCGAAAATCTCTCAAGTTCGACAGGAATCAGGTGCATCCA
>Locus_52038_127
AGAAACTTTAAACTTCGGTGAGTCGTGGGAGCATAGCTATGTTTAATATCTTGCTCAGAATTTTTAAATCTCACCATGTTCCACTTAATCATTATCTTGTTTAGATGTGTACAATGTCTGTAAACCA
>Locus_52037_115
GATACTCTGACCGCACCTCACGGACCTGACCTTGAAGAATTCCCTGTAACATTGCTGGCCCTTTCATCTACCCAATCCTGTAGACACGACGTGTCCCCTTGCGATGTGAAGATAA
>Locus_52036_107
TTTATTAAGATAAAGAAGGATTCTAACAAAATTTTAGCCAAGTGTATAAGTGCTCTCTGGGCATCTGATTTGACAAATTCTTGTAAATTTTTAATGGCTTTTTTTTT
>Locus_52035_84
TCTACTTCGAAAGAAAAGGTATAATCTGATCAGGTCATTTGTGGTTGTCTTTGTCAGGCAATCAGAACTGATGGAAATCTGTGG
>Locus_52034_127
TGCCGCGTCTCCGACCACAGAGACAGCAGGGACACGACGTAGGACTCAGTCGCCTCCTGGATCGCAGCGACGGCGGAGCTCTGGAAGCGGAGGCCATCCTTGAAGGACTGGGCGATCTCGCGGACCA
>Locus_52033_374
AAAAAAAAACCAGTCTCAAACTCAACAGCTGCTGCCGTCGGAAATAAGACTTGAAGGGCTTTTAATCTCAGTCAGTGTCTAGTAAGTCATGGATGACAACTAAGACAGACACCCACAGGTGGCAGTGGATTATCTACAATCTACACAAGAACAGGAGACGTGACGTCATCTACCACGCCACCATGCCAATAACTGAATGCATCGCAAACACAGTGGCACAGCGCCTCTCTCATAACAGTGGCCCAGGGGCTTCACTCACACAGTGGCACATAAAATTCACTCACAGTTGCACATCACCTCACTCACTCAAACAGTGGCACGTCACTTTCACTCAGAAACAGGCATAAGAGCATCACACAAAACCACTCAACATT
>Locus_52032_91
CTTCCCAATCTGGTCCTCCGACCGAATGCGACCACCACGTACTTGTTCGAGTTGAGCACCTTGTTGAATTCGATAAGGTCCTTCACTTGAG
>Locus_52031_98
AGAAGGCTAGAAACGATCAAACCCACACAAAATGGCATGAAGTAATTTAAAGAGAGATAAGCAGCTCCACACGCACATACAAATGGCAAGAGATCGGA
>Locus_52030_71
AGGATATCTCGTCGGTCCCTCAAGTTTAATGGATAATATGTTTGCTGCTTTGGATCCTGACCAGACAATGC
>Locus_52029_87
TAACATCAGAAGAAAAAAGAAGCAACTCAAGAAACTCATCATAGCTTTGGAACTTCTGTTCACAACAAATGTCTATGTCATGTGCCA
>Locus_52028_120
AAGTAATATACATGGGGTTACTCCCCAAAGGGACTTACACCTGGTGACTTCAATGATTTAGTTCAAAAAGCACATCTCAAGCGGAAACTGGAGATGGCCATCAACAGGAGCATCGTGCCC
>Locus_52027_91
TTTTTATGCTCGGAACACAACTTCAGGGTTGTATTTGTCATCAGCATGACCTGGAAATCGTTTAGTACTGTGTGGGATTTCAAGACCACCA
>Locus_52026_127
GATCCCCTCGATTGAGGTCACTAGGGGAGTTAACCCTGCCTGTGATTGTCTCTACTGGTCAGACAGTTCAGTGCATCAGTTAAAGAGAAATATTCACAGAAAAGAAGCAAGAGCACATGACACTGCA
>Locus_52025_114
CCCATTATGGCCTGAAATGAATGTGGACTTTGGTCAAGACAACAGACCACGCTTCCCCAGGTCGTCAGCGAACTTCTATAGGGCTTTAATAGCAAACAGGGGACTTAATGAAGA
>Locus_52024_105
GGTAGAGAAAACGATGACGGATGAGCTCTGCTGGAGCTTCTGGGTCAGACTTATTTTCTCTACGCTCACCATGACGTGGACAAAAGCCTTCAGGCCTCATGACAC
>Locus_52023_120
CGTCACAAGTTACCTACAACTAAAGACAAAACATCGACAGGGAACCTTGAATTTTTTAGCACATTCGATGTACCGTGCCCTTTCATCTTTGGAAAGATTTGTGTTGTCCACTACCACACT
>Locus_52022_79
CAGGTACTTCTTCGACAAACGCTTAGGAATCAAGCGCTTGAGTTTGTGTTTCTTGGCTTCATCGGAAGCGGTGGGGTGG
>Locus_52021_107
CCCATTACAAGGAGGTCAGCAGCAGGTAACGAAGCTCATTCATACGGACGAGGCAAATTTGCAGACTCCAAGATGTTTCAAATGGCCTTGACCCCGTACCTTTTCTT
>Locus_52020_83
AGGCTAGACCCATTAGTCGGGAATGTCAGCTCAAATGACGAATGCCAAATGAGTCAAAATGATGTTGCAAAATGATGTTGTCG
>Locus_52019_136
AGCCCCCTTTGGAGGTTGCGATTGGTGGTCTTTAAACATGCGCACTGACTCCCCCCCCTGCATCATCCTAGCTAACCAACCATAGACTTTAATTGGCCGACCCTAGCTTGGGCCATTCTTATTTGCCCAATAAAAA
>Locus_52018_88
CCCATTAGAGTTGCACTTGGAAACGATTAATTAAAAATGGTCAAGTTCCTGAAGCCTCAAAAGGTTGTCATCTTGCTTAACGGCCGGG
>Locus_52017_93
CACCCCGACTACAACCACTTCCTGATGAGAAACATGAAGCTGAGAGTCGTGGCCAGGGCACCCATGACAATCACAGTGGACATGACGGCCTTG
>Locus_52016_101
GCTTCACTATACTCAGTTTATACAGCCAGCAGAATGAATCTGCAGCTCTTTAAGCAAAAGATTGCAGCTGCTAAAAAGGGTCATGAACTGCTAAAACGAAA
>Locus_52015_132
CCCATTATTACGCGCGGCTAGATGTCCTTTGATGGTTTGACTTTTGTGTAGTTTTCCCAACACATCACAGCACACCAAAGTTGTACAGTTGAGTGACACACGAAGTTTGCCCGTGTCAACAATACAGTCTTG
>Locus_52014_95
GTTTTAGCACTTGTTGAGGACAATCTTCTTCGAAAGGCTTATCATGACGGTTGGAAACCTAATATCAAACATTACATGCCTGCAACACGATTCGG
>Locus_52013_146
CTACAATAGTACTTTCCGAATAGCTTAACACAAGGGCTGGATTTATTTGTAGAAGTGGATGTTCAAGATCAAAGACCCAAACTCATGGCCTTGACCCCCACCTCATGGCCTTGACTNNNNNNNNNNCCCACCTCATGGCCTTGACT
>Locus_52012_113
GCTACATAACGCAACTTTGTTGTATGAATCGAGCGTTTCGTTGTAGACTCCGCCGATGCAAACGATGCGTGGAGCGGTGTAGCAATCGATGGGAGCGGCGTCGAAGAACTTCT
>Locus_52011_103
AACTACAAGTGAATGTAAGGAGCCCAGATTCCAATGGTAGTAACACAGGTCAGCAGATAGAGTCACTGTTCAACTCTAAGCTCACAGAGGGAATCAAAGGCCG
>Locus_52010_147
ATCGTGGAGGGTCAACTTGTTGGCCTCTGAAGTCAAAGCCCCAGAAAAACTTTTTGAAGAAATTCAAAGTGGAAAAGATCTGAAACATGCAGTTACCGCAGACAAAAGCGCCCCAGCTGTTGTCAACCCTGGCCAACTGATGGCTGA
>Locus_52009_76
TGAGGGTGGGGACTTAGGTCCTGTATTTCCCCCATCATTTAGGGAGTTACCTCCTCCAGCACTAGAGCTCTTTGAT
>Locus_52008_91
TTCTTGCACTCAAGTTTCACAGACATAATTTATTCTAACCAGTTACATAAGAATGAAGGTTGACCAATGGCCGTCCAGGTCCATCATCTGA
>Locus_52007_158
GAGGGGACATTTGTTTAGCACCTACATTGCGTACATGTCATGAAATCTTCAGTTAAAGTACGTGCTGCTGTCATCAACGTTGATGTGGAAAGTGTGTGGGTGTGGGTAGAGGGCATCTCTCACACCTGTTGCTCACTGGAGCAGACGATGGAGCAATA
>Locus_52006_121
TAATGTTGCCGCCAAAACGGAGCGAATTAATGACGAAAGATCTTCTCCTTGCTCTCGATGCTGCAAAAGAGGCCCATGCATCAACACCTCTCACCGAAAAAACCACTGAAATCTACCGTGA
>Locus_52005_117
AAACACATGGGTCAGGAATAAATGTCACAGTATGATTAACCCCATCGCTCCCATCTCCCATGGGGTGAATGATGATATTTTAATTATTGATTACTTTTACAAAGTAATTGGCTGTGC
>Locus_52004_295
CAATCTGCTCGCCTCGAATGCCGCCCTGGACCTCTCACACGATCAGCTGTTTTTCCTGGGGTTCGCTCAGAATCTTTGCCACCTGGAACGAAAGAATGCAGCGCAGACCGCAATCTCATTTAGCAAAAGTAGATTTAGAGTCATTGGGAGTGTGTCCAACAGCAAAGAGTTCGCCGAGGCATTCAACTGTCCTCAAAATTCGCCGATGAACCCGGAGAAGAAGTGCCCCTTCTTCTAATAGTCTGTGAACATCTTGGTTTCATCGTGTGTACAAGGGATGAACAGTCTGTGAACA
>Locus_52003_105
AATTTTTTTGTAGTTTAACTCCCTGAAAATGAATCCAATGGGCAGGGAATGACTACATCAGAGGCTCCTTCTTGGTGCAAACTTCCTGCCCCGGTCATCAACGGA
>Locus_52002_86
AAAACCGGTGTGGTTTACCATTCAGGCACTTGGCAACAGCTAAACCAATTCTCCCCAAGCCCACTATTCCAACAGTTGCTCCATCA
>Locus_52001_99
CGAGCGTCCTCACCAACTCCTAGAACGCCTTGTCGTTGTCGCTAACTGGGCAAAGGAATTTCGTCCTCTCCACCTGGAAGCAGGACTCCCAAAGTTCCT
>Locus_52000_86
AAAAAAAAAAACACCTCGTGGTGATCAACCACGACGAGGTGGTTCATCAATTGTCGAATGTGCCAGTGATGATGATGATGAACAAG
>Locus_51999_118
CCGTAGCAACAGTAACCGTTCGGTACAGTCAGTGAACTAGGGACTGGATTCATTGGAACAACAAACGAACCATCCTCTTTGGCTTTGGCTTTTTACAGGGCATCGTTGTCATTGGCAA
>Locus_51998_119
GTTACTAGAAGTGGCTGTCGTTGCCGATCTTGTTGCCTGAGGTGTGCGAGTACACGCCCGACTTGTAGGTGAGGAAATCCTCGTACAGATCCATGGTCGCTGTGACGAAACAAAATGAC
>Locus_51997_71
AAGATGGTCGATGATGCGACTGATGTGGGAGTCCTATTTCAACGTCTGTGCTCGCTCGTGGTCCCCATGTT
>Locus_51996_102
AATCCGTAGTAAGTTCGTTTCTAACCAGTAATTACAAAATTGTTACTAAATTCATAATATTACACATTGATTAATTTATTTTCAAATAAGATTAAACATGTT
>Locus_51995_133
CCTCCGTTTTACTATCATTCTAAATAATCATTTTATTGTTTCAACCCTCAGACCCCAATAATGCCAAGACTCAAGAGTTGTGGCACATGGACAGGGTTGTGCTTTGGACATGTATAAAACCTGCTAATTTTGC
>Locus_51994_254
CTTTTTAACGAGTTTCTGTAAGGAGGAAAGACTCACAGCTCAGACCATGGGAGCATAGTTTCCGGCCTTGCATTTTGTGGAGAAGGAATACGAGTGGCGTCTGTTCTCGTCCGCAGTGACGTCGAGGAGGAGGCTGAAGCAGATGCTGTCATTAAAAAACTGACAGAATACAACTTTCCGTTACAACACAGTTTTGGTTTGATGTACGCCTGTGTTGGTCGTGGTGTTCATGTTTACAATAAACACAACGTGGA
>Locus_51993_72
TCTCCCGAACGACGGCTCGATTTCGATGGCGCTGACGACGTCCATGCCAGAGGTGACCTGGCCGAAGACGCA
>Locus_51992_102
TTCCCCCGTGACCCCGAGGTTGGTGTGTTTGGCGAGGGTTTCGTTGGTCCAAGCAACCACTGAGTCCACCACATCGTTGTACTCGATGTCGTTGATCAACTC
>Locus_51991_82
TACCTGCGCTAAAGAACCTTCGCGATCATTTCCGGGTCACGGGAGCGTGATACGAAGAGTGAGATCAGAGAAGAAACGTTAT
>Locus_51990_169
GGGAAGAGTTTCAAGAACCTTCGTTTCCATGGTAACACACACAGACCGCAACACTTTTCCAGCCCTTCCAAGTTCTTCTCAGCATCTCTCATGTCCTGATTGATCTGGTCCATGCCCTCCTCAATCCTGTCCAGTTGTTCGCCCTGGTGGTCCAACATGACGATTGTCC
>Locus_51989_146
TTACTCCTAAACTACGACAAAATTCAAGCCAAAAACTATTTAAAATCAGATGAGTATCCAAGGAAGCACCAAATGCTTTACAACGCAACTCATTTAGATCTGAGTTCACCAGATCTCCAGAGCTTGGTCATGGAGGCCACGTCTCA
>Locus_51988_126
CCCGCTAATTAAATCGGACTTCTGCAGGAGAGAGTTTCTGGATTTAAGAGACGTTTTGCTGGAGTGTTTGTACAACCAGGGGAAGAAGGGGGTCATTAGCATAGTCACAGAAACCCTTGGAAAGTC
>Locus_51987_72
TGCTGTAGCTGCTGGTAGACTCGACGCGAGAGCAGACGATTGGATTTAAATTTTCGTGTACGGATTGTAACA
>Locus_51986_110
AGAGCGTAGAAGCTGGTATAGTTGATTCCCATCTAATACCAACTGTTGAATTTCTCAAATCCAAACGCTTACCAAGTGGTAATTACATTTCATCCAGTGAGAGTAAATCA
>Locus_51985_88
AGTCACTATACACCGTGACGTCTTCACCTGTGTCATGTGGTTTTGCGGCCTCCTTCAGGTAAACCACCAGGCAATGCGACCAATGTTC
>Locus_51984_73
GATTAAATAGACTTACGGTATGAAATCATTGTTACCAAAAAGTTGAAAAAGGGGGAAATTGAAAAAATCAGGG
>Locus_51983_82
ATGTGTGTGCAGCAGCCGAATAGATGCTCGATGGGTACAACATGATTCGGATTCGTCGTCCGAGAGCCTTCGATGGCAAATT
>Locus_51982_84
AACTTCTTTTCTAGGCGTCATTAGAGGGCCAGAATTACTGAGAAAAAGCCGGCTAGAGCCAAACATGATATCTCAGCAGTTCTT
>Locus_51981_93
GTAACACTCCATTGAATAGGCCGACACCAACCATACTTGTCAATTGAAACAGCTAGAGGATGAGCTTGGCTTTAGGCAGAAAATATTACCCTG
>Locus_51980_130
AAACAAGTTTATCGTTGCAATATTACAGATTTATCAAGTTGGTGTTCAACGTCATTCATCGGTCACTCTAGCCTTAACTAATCGGGCCAGGTGCTTGACCAATGGTAAAGGGCAAAAGATATTCAATATC
>Locus_51979_92
AGACGAGGCGAACCGTTTCGCGCGTTGTGAATACCAGGAGTTACTGATTGGGTGACTAGATAAGGAGTCTCGGATGGCATGGGAGATTGTCG
>Locus_51978_99
AAGGCGAAAGAAGAGGAGCGGTTCGAGCACTTTTTCTTCGGTTTTGCCTTCGTGAATTTGATCGCTTAGACGTTGAATTTGACAACGAAGGTACAATCG
>Locus_51977_101
GCCATCTCATGAAGTTCATTGTCTTTGATCTATGGGCGTCTGTCTGGGAATTTGACTTGACAGACACTTCTTTACCGTGCCCCATAATGCCACATTGAGAC
>Locus_51976_95
GGTGTTATAGAAACGCGGGCTCCTTAGTGACCAGTATTCCATCGGGAGTGACGACCACAAGTCTGGGGATGCCGGTAATTCCGTACAAGTTTTTG
>Locus_51975_98
GACGAAGGACAGACGACTGTAGCTGCTTCCTGTCTTCTCGCCAACCGTGACCTACCTGCTATTGAAGCGGTTCCCGTCTGCTAACAAAGATTTTTTTT
>Locus_51974_118
TAGAGTTCAGTCACTTTCTCGGCAGTCCCATAAAGCTGGAGTGTGAGGTCAGAGGTGACCCCAAGCCGTCCATCATGTGGCTCAAGGACTCGCTGCCCCTCGACATTAGCGACCCGAG
>Locus_51973_142
GGTTCAAGACCCTCCAGTAGTCAGATGAACATGGCATTGACCCCACTGGCACCTATCACGGTGACTCTGACCTCCAGCTTGAGAGGATTAATGTTTATTACAACGAGGCAACCGGCGGCAAATACGTGCCCCGTGCCATCCT
>Locus_51972_221
TCATATAACACATGAATATTATGCGAATTGGTCTAAAGAGTAAAGAGATACAATATTGAAATAAATTAAGAGACAGCGAAGAAGATAGGAGTTATTCAATCTGCTTGCTTTCTAAGTCCTGAACTTGTCAAATGACGTGAAGGTTAGATGCCACTTGAAGTTGCGGGGGAGACCAGCAACAAGTTCAATAAATTACCGAATCATTTTTTCACATTGCACCG
>Locus_51971_77
GTTGAATGGTTCTCTAAAGCGTAGATTTTTCAATCAACAAGATCGAAAAAAGGCTTTGAAAATGTTGATGCCCAAGA
>Locus_51970_89
GCACCTGAAACTCTTGCGCTTGGACGATGGGAATGTCGCGACCTTCGATGCGGAAAACAACAATGTCACCGGCACGAATGGGTTCCTCG
>Locus_51969_112
GACAATGTCAGGGCCAGTCGCTTGTCCCTGCAGGACCAGGAGAAGGCCTACCCCAAGGAATCCGTGACCGACATCCTTGCCCGGATAGACGCCGCTGTGGAGAAGTCGTGCA
>Locus_51968_117
CGACTAGTTTGGAATGTTCACAATCGTGAACGACAAAATAATCGAAATTCTCGAGATCGTCTCGTAGACGAACAAAATGCCGCTTATCTCGAATCACTTCGAGCGGATGAAGAAAAG
>Locus_51967_101
GGGGGTACACAAGAACGTCTCCTTCCCTGACCTGATGCCACAGCAGGCTCCGAACGCCTACGTGCCACGCATCTTCGGCTTCAAGATCTTCAAGAAGAAGG
>Locus_51966_157
GAGGTTCAGGTACTGGGTCTACCCATCTGTGCCTCAGAACTCATGACAATAGCCAGCCTTTAGCTCTAAGACCTGCTAGCTCTTAAGACTTGATGTTTTGGTTGTGTGAGAGGAGATGTTCTTCTAATTTTGTGAGGACTGTCTGGACAGAATCAGC
>Locus_51965_94
AACGACCTGCCCACGGCTAGCTTGGTGTGTGTCTGGGCCATCAGGCGATCTTCGAGGTGTATGGAGGCACAGTTGCAGTGTGTGGGGAGATCAT
>Locus_51964_102
CGCTGAGAGAACTCCATTTATATGAGTCACCCCAAGGATATCTCCACATTCCCGAACATAATATTCCAGGTCCTCATCAGTACATTTATTTGTGATTTGTGC
>Locus_51963_73
CAGTGTAAAGGTTCTGTGTATATTTATCACATTACATGAACATCACAATGATTTAATACATAAAAATAACGCG
>Locus_51962_278
AGACAGTTTTTCTGGGTGTCACTAGTAACTGTGGAGGATGGATACCCTCAACACGGTGTCGGAGCCGAAATCTGCGCAATCGCTTTTGAATCTCTGTTTGACGAACTGGATGCTCCTGTGCAAAGAGTCACTGGCTGGGATATCCCTTTGCCATATGCAAGAAACCTGGAGAAGGCTGCTTTGCCACAAGTCGAGCACGTCATCAAGGCAATTGAAGCCACCTTGTAAAGCACATATATACTTTTTGCGGGTGAGGAGTAAACTAAGTAAAAAAAAAA
>Locus_51961_106
GTACAGAAACATGGTGGATTTACAACATTATTGACCACAGGAATATATAAACACTAGAGTAGAGTTTTCACGGGTTTATTCTAACCACGGCAGCTGATGTGCCACG
>Locus_51960_92
AAGCTCAGGTCAAACATCAGCGATTGGCACTCCAGGCAGTTGTCTGCGGATCCTTTGCAAACCAAACAAGTGTTTTCACAAGGAATGCAGGA
>Locus_51959_84
TTGGACGTGAAGTTTACACTTGTATTTCTTCAAATTCTTGATGATCATTACTAAAAATGGCAATTTGATCCCCAGGGTCTTTTT
>Locus_51958_96
CTCCTTAGAAGAACATCTAGCCCAAAGAACTTGAGGGCCAGCTTTGCAGCTTGTTGCTTGGCGCCTTTTTTAGAGGAAGCTCGTCCCTCAAACTTA
>Locus_51957_102
AGGGTGAACATCCTAACTCTTGCCTTAGCAACCAAGATGGAAAGTTCTTCACCGGAAATTTCATCCTGGTTGGTTGTGAAGAAGGTGGTGTGATAGGGGTGC
>Locus_51956_127
TTCGTTCTGTGGTTATAGATCAGAGTTCGCAGAGACTCTAAAATTGCCCAAGGAATTTTCCTCTGCAAGATTATCATGAAGAAGCATGGTTCTGTACAAATTGAGGGAGTTGGAGAGTCAATCTCGA
>Locus_51955_129
GTTTTCGGGTAGTCGGAATAGTCGCACAACAACCCTACAACACGGCGCAACCTAACAACAGAGCACAGCAGAGCCAAGTCGTGTACTTACAGAATAGCACGGGAAATAACAATGTTCACCGGGAAAAGT
>Locus_51954_76
GCTATCATTCTGTAAGTGAGTTCGATCTTTCCAAGCTCATCTTCTCTTTCTTTCAGCAACTATCACGAAGATTGCG
>Locus_51953_74
AGTCCTAGATCAGTAGACCTAGGAGTCTCTGAGCCTCAAAAAGTCTCTGAATCCAAATAAGGAATAGATCGGAA
>Locus_51952_81
CGCTACTTCGTATGTTGTTCAGGACGTGCCGTCATTATAGACAACGAACTCTTTGAGACACTGAATAAACGGAAAGGCACA
>Locus_51951_158
TGATTAAATACCCTAATGTCCGTCAATTAATAGGAAGAGATATTATTAATGTTGAGTTTTTGTTCCCACATATCTCCGACTCTTATGAGTTCTTCCAATTCAGCGTCTGTTACGTCGAAAACGGCTCCTACTGGAGATTTTGGGTCAGCAACTACAAC
>Locus_51950_145
AGCGGTGCTGCGTCGACTACGAGGGCACGATGTCGCGTCCGGTGCTGCTCTACACGCGCACGACGATCGAGAAGTTCACCACGATTCGCGGCTCGCAGCGCAAGATTGCAGTCGAGCAGCTCTTCGACTCGGAGGACTGCTCGGG
>Locus_51949_79
ACGGAACACTGTGTCGTCTGGTGCCATGGTTCACTGTGTCAGACACAATCAAATGCAGCATTAAAACTTGACTGAGTTG
>Locus_51948_84
GTCGGTCGCTTCAATGGATACCAACCTTCTTCACTGCTAACAAGAGCAACAAGCTAGCCAGGAAGATGATCGACCAGCTGCTCA
>Locus_51947_155
GGGGGGGTGGGGCGGGAGTGGCTGGTCCCACCGCTATCGCTTTGGCTCCAGCTCTCGGTCAACTCCAGGCTGGTCTCTACGTGTGGGAAGAGTTGTTGATCCTGTTGGCCTTCCACGTGGTCAGCTGTTCTTTCTATGCTCAGCCAAGAGCCAGC
>Locus_51946_109
AAAAACCTAAAAGCACAAAATCAGCTTCTTCTTGTCTTAATTTGATTTGTTGTTTGACCCAATTTTCATTAAAAGGGGTTAAATGTGATGGGAGGACGACAGTAGTGTC
>Locus_51945_72
AAACCCTTACGTCGAGTTTTCCCGGGTGGTAAACTTCACCCAAGGCTAAATAATTGGCGAGAGACCGATAGC
>Locus_51944_108
GCCTTCGCACGTGCACGTAACGAGGAGGTATCTCATCGACATACAACTACGAGTCGTATTTCCTCGACGCCGAGCGCACAAAAGACGTCAATCGAGTGACAAACGCAG
>Locus_51943_72
CATCATATGCGGTGTCTGAACCTTATAGATTGTGCAAAGAACGGGGGAAGAGCGGACACAAACAGCAGCACG
>Locus_51942_81
TATTGTCCCATTACAACTAAGCGACTGTGTTCCTGCCTGATGACCGCGCCTGATGCGAGTCACGGTGCGGTGCCAAAGGGA
>Locus_51941_103
ACCCCTACGGAGAGTACTCTATGCGAAAGACAAAGATGCCAAAGAGATTGATCCCAAGCCTTTACCATCAACCACATCTGCACCTGGCTCTATAGAACCGGAG
>Locus_51940_117
GTGAGGTTCACGGCAGTCCTGTTCTTGGACCGCGTCAAGCGCAACGAGGAGATCAAGAAGAAGGCCAAGGCTGAGAAGAAGCCGGCCGTGCACACCAAGCGCATTCCGGAGCAGCCG
>Locus_51939_77
AACATCGACTAAAAAACAAATTAAAGAAGTTTCTTTAAAGAACATCAGCATTTAATATTAATGTTCAAGATCGGAAG
>Locus_51938_102
GGCTTTCAAATGTTGACTTATTCGCTTTACCACCTTCTTCTAAGCTGATGCTTTGTGGAAATTGGTTAAAGCATGGGTCGAGTGGTTCTTCATCACGAGCTT
>Locus_51937_73
TTGATAAAGAGGATAACATTAGAGTCTAGAAAGGTCTGTGTCAGGGATTCAAGAGCTTTGGCTCGTGGTTAAA
>Locus_51936_120
CCCATTACATACAAAGGGTAAACCAGCAGAGCTTGACCGGTTCAACTCACGTTTCCCATCTTCATCTAGTCGATTTCTAGTTAACCATTATGTAACAGTGCCCAAGTTTTCTGGTTCAAG
>Locus_51935_93
GGAGTTTCCGTTTTCATTTCCCTTTGTCGATGATATGAAACTTAAAGAATTGAACAATGGACGGATTGCCATGCTCGCGTTTGGTGGTATTGC
>Locus_51934_100
ATACTTTATATTACGTCTTTAGATAATTTCAATGTGTGCCAATATTGCAAGTCCAGACCACCTGGCGGCCCAATTCCTGAAACAATGGTGCCTCTGCTGA
>Locus_51933_78
GAAGGCTAGAAAAACGGAAATCTGTGTCTGATCTCAGTGTTTTCAAAAAGGGCAGGAGACTAGAGCCACCTGTTCCCC
>Locus_51932_124
CAAGTTCTACGGGCAGAAGGATACGAAGACGATTGAAAGTATTTTGGAGCCTGTAGCTCAACAGGTTTCAAGACTAGTGATCCTTCATGAAGAGGCAGAAGATGGAAACGCCATGCCTGACCTT
>Locus_51931_74
GATGTCAAAAGCCAATAGACAACTCATGGTAGATTGGGCGGGGCATGGCTCTGCTATGAGGGCCTTGGTTGAAC
>Locus_51930_128
GAGAACCTCTTCCGACTGGCCATCTACAAACAACTTCAGCTCCACCGACCAGTCCTGGAGAGTTTGTTGATTCAAGTGGCTGAACATGGCTCAGATAGACCTCCTACCGGTAAAAAGAAAAAAAATGA
>Locus_51929_100
GTTACTAGTTTATACAGGGTCAAGCATGGATGAATTACAAACGTAAATCGACCGAAGGATGGTCAATTGGAAATATTCTTCTTGATTTAAGATCGGAAGA
>Locus_51928_81
GAAAGACTGCCTAAGTGGTTAATCACCAACTTCCATCTGATTAGAGATAGATCAGGTATAAACGTGACCGATGCTGCCCGG
>Locus_51927_253
TTTTTTGGGGCTTCCAAAATGAGCAAATCCTGTCACAACAACCGGCATGACAGGAAAGTCTTCAGGTCTTGGAATGTGTGTCACACCAAGTGTGTACCAAAGGACGATATCTTCATCGACGATCGGTCGATTTTGTTCGGTGTATTTCCCAAGACCATCGTCGCCGTGACTTTGATTAGGATAATTTCCCGAAGCAAACATTTCTTTCTCATCAAATGGGGTAATCCAAACATGATAGTCGACAGATCGGAAG
>Locus_51926_132
AAAACGAGTAGAGACCACCTGTTGTTCACGATTGCGCTGCCCACGATGTGGATCTTTTGAGATGGTTGACTGGCCAAAGCCCTACCTCCGTCTACGTTGGTGCCCCTGCTTTCAACCCCGACGTTAAAGAGC
>Locus_51925_101
AGAAGGCTAGAGCTTTAATACGTCATTTCAAGAACAAGATTTTAATGTTTCACGTCAACATGAAGAATTTATTTGGTTACATGATCGTTGCAAGATCGGAA
>Locus_51924_98
ACCTACGCTACAAATTGTTAGGTCACCCGAGCAAATCGATCAATCGTGCTTCTACAAATCTCTCACCCGACGAAAATGACGTTATTGTTGATGTTGTT
>Locus_51923_86
GAACGTCAACATACACTAACGTTGACATTGAAACCATAGCAACAAGGTTCAATTGTAGGTTGGGTTACAATAATCTCAGATCAAAG
>Locus_51922_102
TCAGAAAGCATGTACGGTTCCGATGGGTGTCATCCAAGGATTTCTGGATACAAACTGGATGGGGCGAGTTGTGCTTATTTTATTACTGGTGGCTCAGCTCTT
>Locus_51921_97
GCACACAAACTGAGCTGTGTGTTTTCGCGCAGTACCTTAGCACACTGTGTGCGTGATAGTGTTCTCACCACAACAGAGAGAAACAGTGTGAGGGGGG
>Locus_51920_90
GGTACTGACCTTCTACGACCAAAGGCTGGCTCAGGAAAGGGCTGCCTGGGGGTGGTCTATGCCCTTCGAAGGATCGCAGACATCGACGAT
>Locus_51919_129
CTATGTGTGCCGGTAGGGCACCATCATGGATCCTTCCTTCCAAGCTATCCAAAAAGCCCACACTCACCCCACTTTCCGATTACTCGGTTCTGCGATTTCCATCACTATGGGAGCACTCATAGCAAGGGC
>Locus_51918_84
CTTGCGTGACCTAAAAGAGAGACCTTGGCCAAACTAAAAGTTTCCATGTCTATGCCTTCTCCGCTAGTGGTTTGACTTTCAGTG
>Locus_51917_111
AGAAGGCTAGAGAGCGATTTAAGGCACACAAAAACTGTCAATACAATGCAACTTTCTGTCTGGCATCAGATTTTAGAAGATCTGATGTAGTGAACGCAGATCGGAAGAGCG
>Locus_51916_106
AATGGTGAAGTGCTTATTAGTCGGGGACTACTACGAAGCTACAACTGTCGACAGTGCGTTAAGTAGAAGTAGAGACCCTGTAGGTGAATAAGCACCAAGAGAGACC
>Locus_51915_78
GAAGGCTAGACATGAGATAGATAAATGTTTTTGAATATAATCTACGTTCCGGGTTCGAAATTTAAATTTTTAAAAATG
>Locus_51914_129
TAAATTTGATCAGATTATATTTGCTATAATCAACAAAACACAGTAAGCAGCTTGAGCTACATTCTCACAGAAACCCTTGTGTTTGTCAGTCCCTACGTCCTGAGATTTTGGCCGTCTGAAGGGAGGGTG
>Locus_51913_103
CAGCTTCAAGTCTCGAGTTGATGCGAGGGAAATAGTGTTAAAGTCAATCAAGCTAGGGGAAGCCATGCTGTGAAGTCTTGGTTCGATTCCATCAGCGTCTTCG
>Locus_51912_104
GATAAGCCACCTCCACCTCCAGGTCGATTCGGTGGAGATGGAATCTTTGGCGGCCCTATAAGTCGTGATTTGCATGAACAGGAACCTAAAGAAAACAATCAAAA
>Locus_51911_87
TTACTTTTATAACACGGAGCTTCTACCCTCTCTTCCAAGCCGCCCTTTCGTGCTCCACTGCGTTCAGAAACACAAGGGCTACTTCTA
>Locus_51910_102
TCTGTGTGTCTGTGTTTGGTAGGCTACGCAAGTCAATCGCCAAGAAAGAATGCTCGGTCAGATCGTGAAGCAGGCTTCCTCGCAGGTGTCCATGGCTGGACG
>Locus_51909_87
ACACGAAACGAAATAGAGGCAACTTACGATGTCCAACGCTAAGATCACCTACTTCAACGTGCCCGGCCGCGGCGAGCTCCCCCGCCT
>Locus_51908_75
ACAAAGTGAAGCCGCGATCACGTGTACCTGTTCAAATTGAACTCCAGGTTTGTCGTGGTGCTGAAGACGATGGCG
>Locus_51907_124
CGCCGGCCCACTAGCTTGGCTCGCCGTCGTCGTCGACCATCGAGAAGATCTCCTTCATTTCATTGATTCGCTCTTCGGTGAGCGACATGATTCAACGTGCGAGTGGCGGGTGAATGCAGACTCG
>Locus_51906_115
TCCATCCAACGGACGTAACCGGAGGACTCGGGTACAGTTTGGTCATGCTTGAGGTGACGCCCATGTCTGCAATATTGTACTTTGTTATTTGGTGCTTGTGGGTCAGCCTCAGCAG
>Locus_51905_96
GAAAGCAAGCAACGTGAGCGCATGCTCCCTGTGTAATTTTCGTTTTTGATTCTTCATTGTCGTGAAATATTTCTTGCAGATAAGCGAGATCGGAAG
>Locus_51904_82
GTAGCCCACGCAGCGAGCAGCACAGTGTGAGATTGTCGCGAAGTAATTGCATGATAAGGGTGCTATCCTTGTAGGAATCTTC
>Locus_51903_82
CGTAAGCAGCTGTCTCGCTTCTGGATGTTCTCACCGGTACAGAGATCGCGAAGATACTCCAGCTGCTCACGCTCTGTGCGGC
>Locus_51902_101
AAACAATAAAGACTCAAAAACAAGAAGATCTGATTTCAGTGCAGTCATTCCCAGCAGAGTTGTGACCTTTGGCCTTGAGGCAGGGTCAGCACTAGAGCAAA
>Locus_51901_87
TACACGTCTATACCGTTATGAGAATGTTATAGGCGACAGTTTCAGGGGGGCTACGTGGGTGGCCATACACAATGGGGGAGGTGTGGG
>Locus_51900_110
ACAAACACCACGTCGACCACGGACATCACTTTGATCATTAGTGTTTTGTTGCTCAATCACCAATGGGAGGATCGGAGCCAGTACCACAACAATAATGGCAACAAGCAACA
>Locus_51899_128
CCAGTGAGGCGATGGAGTGTAGTGGAGATTTGAAATTGTTTGATCACATGTTGACAAGAATACCATGAGAAGACTTTCGACAATGCTAGCCGTACGCGTAAATCTTCTGTGTTTGGTGGTGGTTTTGG
>Locus_51898_101
AAGGCTAGAGAACATAAGTCTATTTATGTCTAACTATAACCTAATTATAGATAATTCACAAGGACTATACTTTAGGGAAACTAATGTTTTGGAGATCGGAA
>Locus_51897_80
AAACTCATCGCAGCGTCCACCATTTACCGGCGGAGCCGCAGGAATGTTAGGCAAAGCACAAAACTTTCTTGGTAACACAG
>Locus_51896_144
ACCATTTTTTTATATATATAAGCAGATGGTGGATTGAAATTCTTTTGCGGAAACCGTTCTTTCATTGGAATGTGTTTTGAAATGCGGTTGTACATGTTAATCAGGATAGTGGCAAGGTGACGTCACATCAGTGTGATAAGGTGA
>Locus_51895_134
GCACGACCATGACAGGCTGCACAAGCCGTCGATGTTTCACCATTACGACGGGTTAACCAAGCACTTTATTTAATCTGCACAGGTGCACGTGATTCGGCATTCAAATCAGTCAAAACCATTGCTGAATGTTTGGC
>Locus_51894_76
CACTCAGCTTGGAGTAACACCAGCTCCTCCGTGACAACCTCAACCTGTGGACCGACGAGCAGCAGTGAGGCACAAC
>Locus_51893_81
AGGCTAGAGTCCCATTAGCGTGCCAAGTCTCACTTCAACATCAACTGAAGCTGTTCTTCTTTCCAAACAACGTCGTCAACA
>Locus_51892_131
CGGCGCGGAAAATCGAACGGATTGTCCTTCTCCCACTTAATCATGACGTTCACGGTCCCGCTCTCGAGACCGGCGGCCTGGACGACCTTATGGACTTGATCGCATTTTTCGGTGATGTCATTCATGGCCAT
>Locus_51891_145
TCCGTTTCTTGATGGGTTGCAGAAAAGCGCTTTCGGCGAGCGGCCGACGTCTGCAAAGTCCAACAAATCGGCAAAATCCGCGAAGTCGAACAACAAGGAATCCGAAAAGGAAAAATCGCAGAAGGGAGGAAAAGACAAAAAAGAT
>Locus_51890_95
TAAATCCCTACACGATGGAATAAAAAGAATGTGCTACATTTAGGGATATGCTACATTTAGGGATGTGCTACCTTGAGGGATGTGCTACCTTGAGG
>Locus_51889_104
TTTTTGAGAAGGAAGACCTGTCCTCCTTGTTACTGGACCATACAAGATCAACGGAGTTCCTCTCAGACGTGTTAACCCTGCATTCGTTATTGCCACCTCCACCA
>Locus_51888_83
AAAAATAAACAAAAAAAAGAGCGACTCTGAGAACTGGCTCACCGTGTACGACAAACACCTGGAAGAAATAGCTCGTGTAAGGC
>Locus_51887_92
TATCGTCAGTAAACTAATTCCACAAAGCATGCTCACAGCATTTTGGCAATAATACGTTGAAGAAGGCTGCTGCAAAGTGTAAAAGATCGGAA
>Locus_51886_85
TCCTCACTTAGTCGTTACATAGCCACAACGTTTGGTTCCGAGACAAGACCAGTGTGGTTGCAGGCCTCTGTGTTGGAAGGTTCGC
>Locus_51885_72
GAGTATGTAGACTCCACACGCAGCAGCCGCTCGGGCAAGATCTACCTCCACACTGACATAAGGCTGATATTT
>Locus_51884_76
CGTTTTGATGACGACGGGAGCTAATGGTCACTTCTAAAGTTTCAGAGAAAATGGTCTGGCCAACAATAACCCAGAT
>Locus_51883_71
CTTGAAGCAGTAAGAACCGGATGCGGTATTCTTTAACGTACTTTTCGGCTCTTTTGAAGATTTCCTTGCGG
>Locus_51882_93
CATGGAAGCCTGAATTCGTTCTACAGAAAGGCTTATCTTTACGCTGCGGACACTTGTATGGGGTCATCTGGTGCCCCGATCATTTCATTCAAA
>Locus_51881_85
AAACGTCTGTGGACATCGAGATTTGTATCTCCAGTCAAGAAAAAGAAGAGTTCAGTCCCAAGTATGGCACCTGTGAGGTCATCAC
>Locus_51880_105
CTCCGGGCATTCTAGACCACCTTCGGTCCCGATACCACTGGTCCCAACTTGCTTGTTGACGTGACCAAGGCCGTGCAATACTTGAATGAAATCAAGGACTCTTGC
>Locus_51879_129
TGCTCAACATTCCAAATTTTCAGTTCTTCCAGCAAGGGCTGCTTAGAATGATTGTCAATCTTGATTTTTTAATTTAACCAAAAATGGCTATTTTATGTCAGACATGAAATTCCCACACTGGTAAGTAAT
>Locus_51878_120
TATTGTCCCATTAGAAGGGACCTTCCCTTCAAAGTACGCAAATAGAATGGTGCTTGTTCAAGACCTCCTCCACCCCGCTGAAGCTTCTGAAAGAAGAAGACATAAACTCAAGAGACTCGT
>Locus_51877_158
TAGAACACGGTGTCGAACGTAAGCCCATTCATCTTCCTGTTTGGAGTGCGCCTGTGTCCGAGTCCGATAGCGTGGGCGTGGGATCAGATGTACAGTGTAAGGGAGTGATTCTATCTGTACCGGCCCGTCTTCGTGTGGTGATAGTCTATCGATTGGGG
>Locus_51876_73
CCGACGAAGTTTGAGATACCAGTTCCTGACGGACTTCTTGCTCGGAGGTGTCTCCGCCGCAATCTCCAAGACT
>Locus_51875_74
TTAGGGTTGACGTCTGGCATCTCATCACCGCATCAGGTCCCCAAGCATAAAATGCTCTGGTACATAGAGAAAGG
>Locus_51874_71
CCCCCCCCGCGCCCCGGCGGTCTGTCGTACTGTTGCAGCATGGGATAGATTCAAGTCTGCGCAACCAGGCT
>Locus_51873_97
CTGCCGTTGCCATGCTATCTCAAGTCGGAGATGGAGAGCATCATCAAGGCCATCTACAACATGCTTGGCAGCGCCATACAGGACCAGCAGATCGAGA
>Locus_51872_250
TCACGTAACCACTCCAGTTCACTTGGAAGAATCTCAATTGGAATGAAACTGAAATGAATCAATGATTATACACAGTTGACACCTTACCTCACAGGGAACACAAGACTGAAGTAAAAGAGGAACTAAATTTACTATTGAGCACTGCTCTCACTAGTGTTTCGACTTCGGTCTTTGGCAACAACAACCTCATCATCTGGTCGAAACTCACGTGGACGGCCCTTGCCAAAAATGCTTTCATTTCGAGCAGTAT
>Locus_51871_97
GATTCTACACTGAATCAAAACAAATCCAGGTTTGGAGACAATCGAGGCCATCGTCTTACCGTCATTACGATGTGGATAGCTGTAAGATCGGGAGAGC
>Locus_51870_361
AAAATGTCACAAATGAAGAAGTTGGAGTTCATAACTCTCTTGACGACCTTAACTTCTTCGATCATGAAAGCTCTGATGATTCTGTCCTTCAAGCAGTTACCGCAAAGGTTGCCACCATATGCTCTAGAAACGGATCTCTTGTGTTGAGAGATGTGTCTGTATCCAGTGGGTCTGAGGGCCTTGATACCGGTCAAGAACTTCTTGCAGACGGGGCAGCTGATTCTGGAAGCTCTCTTGGTGATATGTTGAGCAACCAATCTTCCGCCGGGAGTTCTGACGGTTCTGATCTTGTTGGATCTGGTGTTCCAGGCAGTGGTTCTTCTGTAAGTGACTCTTGGTGCCATTTATTTAATTGCTAAGG
>Locus_51869_275
ACATTAACGGGGTCACCAATCTCTGGACCATTATGTGGCGACAAGAATGATGTGAATTTATGTGAGAGAATCGTCTGTAAAAATAGTGGAGTATGCGGTATTCGAAATACCAATGGACCGTACGAGGGTGTTTGCCTCTGTCGATATGGTACTTTCGGCGAATATTGTGAATTGAATGGAACATTGGGTTATTGCTCTACCGGTTCATGTTTGAATGGTGGTGCTTGCAAGGAAAATGTCGTTGCAACAACACGCCATGCCTACTGTTATTGTCC
>Locus_51868_91
CTCTACAGGAGGCGACGATTGAACCCCGTCCCCGAGACCGTCCTTAAGGGCAAGAAGGTTCAGGCCCAGAAGTTCGCCGACAAGAAGGCTG
>Locus_51867_93
CGGTTGAAACTTCCTACATCGGAGGAGGTTGTTGTTCGATTTGTTGTCGAAGTGTTGAGGGAAAAACAGTAGCGGGGACATCCAAATTCATCC
>Locus_51866_77
AGCAGGAGCGGGAGGAGCGGCTCGCCTGCGTCGCCAGCGTTGTCAAGCTCACCCCCGACAACTACGATGCCGTCGTC
>Locus_51865_81
GAGAAGGCTAGACAGCGCGATGCCGAGAAGAATGCCTTCGATCATGTGATCGCGCTTGGTCAGCGGCGCCTTGACTGCCAG
>Locus_51864_89
TATACCTCATTTTGCAAGTCCGTTTTATTTTTGCCGGAATTTCAAAGAAGGACTGGTCTGGGAGAGTGAAGAGTGAACATGACATGGAG
>Locus_51863_133
ACAGTGGTATATACGAAGGCAACGTCTAAATGTCCAGGGAAATGCCCAGATGTCTGCAGGTTACACGGCATGGTTGGAATCTCACAAGACATTTCCCGATGCATTACACATGCGACTAAAGTCAACATGTCAC
>Locus_51862_142
ACTTTGCGTGCACCGGCTAAGAAGTGGTCGATCAATCCAAATTGTCCTCGTCGAAGTCGTCGTCGAAATCGTTGAAGAAGTCCTTGTGCGCCAACTGCTTCTCCAGCAACTCGTCGTTGGCCATGTGTGCACCGAAAGACTG
>Locus_51861_118
AGAGTGAAGGCGAGAATCAGAGGCAGCCGGCAAAGACGGGAATTCCCATACCGTCCAATTTAATGGCGAGGTCTCTCCCGAAACCACTGTCACATCCTGTGATGAAGACGTATCTGTT
>Locus_51860_77
CGATTTGCTTTGTCGTTCTCACCAGCAGACAAGAAAAGCTCGCTTCACGCACCGGGGTCAGACACACGAGATCGGAA
>Locus_51859_102
GCCAACATAGCCTACAAGTTTTACCAACATGTCAGGGGTGTGTTTGCATCTTTAGACACCACCCAGACACCTACACAAATGACATTTACCCATTTTTTTTTT
>Locus_51858_77
ATATCTTACGTGTAGATGAACTCAATTGTACTGCGAGAAGATAACCCAGGATAGTTATCCATGACAGATCGGAAGAG
>Locus_51857_80
CAAAAGGGCTCTTTTTACCGTGGCTTTGACGAGGGCTATCTCAAACGAGCAATCGAGCTCTCCAGAATGGCCGGTGCCCG
>Locus_51856_104
GGATCGATGTCAAAAGAACGTGGCGTCATCTCTTGTTTCTTAACACCAGTCACGTCTCCTTCACTCCAAGATCGTCCTCTTGTTGCTCAAACCAGAGACGTCCG
>Locus_51855_90
ATGTAAAGAGTAACTCTGCTCCCCATTAACGGTCTTGCGTGCAGTGTTAAAAAACGCGGGGGCTTGTTCCGTGGAAGTTTGGTCGGTGGA
>Locus_51854_118
TCGGCTCGGCGACTAATCTGTAGTCTAGAAATATAAGAGTTTTGAACAGGCATTGGGCGTTATTTACTGATCAAGTGTTGACCAAAGGGTGATGTCCACTGACCAAGCTGTGGTGTCA
>Locus_51853_75
AAAACCAGGATCTTCAAAGGTGGCGTGACATTTTATATGTCTGTGTTAACTAAAAGAGCTTGCTCTTGGCTGTTT
>Locus_51852_113
TATCACTTTGTCCTCAGTATATTGGATCTATCATAGGGTCAATAGCGTTTTTGCTGGTTGTACTGATAGTCATATATTGTTGTTGCAAAAGAAACAGAAATAAAAGAGGCTTT
>Locus_51851_71
CCGATTGTGGTCATCTGAAAATTCATGAACTTAACCTGTAGCTTTGGTTGTGAGGCTAACACCAGTAGACT
>Locus_51850_84
TTCGACGATTACTTACTAGCACAAGCCGTCATCTTCTATAAACCATAATACAGGGGAAGGACACGCAAGATAATGGACGCGCAC
>Locus_51849_94
GGCGAACGTCGACAACCACGATAGATCTGTGGTAGCTGAACTGTATGGCTAGCCACGAAGTTTGTTACATGTATATAAGATTTTAAGATCGGAA
>Locus_51848_126
GTATCAAGAGTGTGGTCAGACCTTGTCCTAATTCTCTGCTGTTGTGTGTCTTCTCAGAGCGAACGCAGTTGTTCTAGTCGTTTTAATCAGCGCGTGTATCATTGTGGTTTTTCTTTCTCTCCAATT
>Locus_51847_99
GAACCAGAAAACAAATACATCAATCCACCAGCAGGAATGGCCAAACAAGAAGAACCACATCAAGAACAAGAACTTCGACGAGCAGATGGATCATTAATC
>Locus_51846_75
TCACCTTCGATAATTCGAACTGCTCATGGGATGAATAAATGTTATGCCTTACTGGAGGGATTATGCCAGCTGATG
>Locus_51845_133
GATGCCAGACGAATCAAGGTAAAGGTCTGGGTATAGCATTTATCATGACTAGACATTTAACAGCTGGCCTCCTAGATGCAATCAATTGTTGGTAGCCTGCACCCACACAAGTGGCCACTCCTCCAAGATTTCC
>Locus_51844_136
GGCGAGGACCCGGGTACGAGCAGTATCAACTGCACATCTCCATATACACAAAACTCGTCTAAATCCCCTTGGTCCAAAACCGACCGCTCTTGGGTGACGCTATCCAAGTATCCAACTCACTGTAACTCTACAACTG
>Locus_51843_71
CACTGGAAGTTCTTCGCGCGTCCTCGTGCCGTCAAGGAGATCAAGAAGTTCGCTGAGAAGGCCATGGGCAC
>Locus_51842_123
GGGGGGGGGCGGTGTTTTGTCAATACCTGAGCTAACATGCCAGAAAGTGGCCCCGGGGTCTGCCTCAAATTGCCAGGCCCGGTCAAGGCCACCATCCTTATCCCCAGCCCTAAGTGACAAAAT
>Locus_51841_129
CGCAACGTGCTGATTCTTAAGCAAATAGGGCATCGACAGCATCACTCGTGGCACGCTCGTGATGCGGCTGTGCGACAGATCGAAGAAGTAGAGGCTCTCCAACTCGTTGATGTTCTCGGGAATGGCGGA
>Locus_51840_74
GCGAAGCACAACCTCGCAACCCCATACAGCGGAGACGTTCTGTCACCCGGTGTGGCGTTGCCCATCTGGTTCAG
>Locus_51839_98
GTTTTGACGTTACCCGGTGGGTCGACATCGGAACGGGTGGAAACGGTGACAAGTGGCATGTCTTCTTACAACACGATCAAGGGTTTGTAAGTGGATTG
>Locus_51838_107
CCCATTATAGCTTCATGGATGCCCAGGTGTCACTAATGACTTATCAGGACTTATGACTTATGAGTACTTATGTCACTTATGTCAAGTTATTTCATGTCGACCACGCC
>Locus_51837_110
TGCGTTCCACGCGTGACGTTCAAGCGCTATCTCAGACGTCATCATCACAATTAACTTAGTTCAGAAAATATACAAACGCAGATTTATGTTACATTGCAATTTTGTTTATA
>Locus_51836_96
GCTTGGGCGGGCCACGATCGTCAGCCTGACACGCCTATGCGCTTTCTTCCGAGCTCTCTCTACCCGTATAAAGAAACCAACCCAGTCGTCGAGAAC
>Locus_51835_99
GAACCCGTAAGAAGACAGTGTGATAGGCAGCTAATTTGCTATGGCGAGCAACCAACACCCACTGCAGACTGGACTGAACCCTTGATAATCTGGGTAAAC
>Locus_51834_176
CTAACGAAAATTTCTTACAGTCAACAAGGGCCATTAACTGCTAAAAAAACACCCAAGTATGAAATTAGAGCAGATGCTGCTATAATTCTTGAAGAATTCTTAAAGAAACATATTGCTGAAAATAAAAATGACTTTAGACACTCTACAGTTACAGGGCGAAACAAAAGCGATCCCCG
>Locus_51833_167
AAGCATTAATTGGAATACGGAGCCTCCCCTGGAAGTTACCAACTGATACAGATGATAGAGATCCACCTCCTGACCACCAATTTCTGGGATGCGATCAAATGGTGTTCCTCGATTTGTGTTGAATCTTCTTAAATCTGTTATGAAACTAAGACATTGTTTTTCATATT
>Locus_51832_202
AAAAAAAAAGCCAATCAAACGGAGCAAAGTTATTAGCAATTTAGACCCTTTTACGAGTAGGGCGACCGGTTCTTGCAGAGTTAGCACTTGTCGTCGTCAAAGGCCCAAATGAAGTCCTTGGGGGACTTGCCCTTTGACCTCTTGCACAGATCATCATCGTTGTGAGGCTTCTTCTTGGCCACCGCAGACGACAACATGCTCT
>Locus_51831_88
ACCGTTTCTACGAACCGAATTGGAGACAGGAGAAGATGAGATTGTGGATTTCATGGACCCAGCAGCTGCTAAACAAGTCAGATCGGAA
>Locus_51830_103
AAATATTGTACTTGCTTCAAAGTTACAATTGCTTAAACCGTTTTTAAACAGTTACTCATAAACATATTTTAAGTATGGTTTTTCATATTTGAATAGGATAGTT
>Locus_51829_140
AACAACAACAACTCGGAAGAAATTCTTGTCCACTCGGGGCATCCGCCGATCACCGTCAACGTCTGGGCTCCCTCCAAGGCCATAGGCCACCAACGAGAGTCCGCCAGGCAGCCTCATGAGCCAGCATCTTCCAGTCATGG
>Locus_51828_92
TACAAAGGTAGCTGGTTGGCGTGGATTGGATGATCGAGGCAGCCCACCACCGCCACGAGTACGAAATCCATCGCTTTGTCCACGTCCACGAA
>Locus_51827_95
CTCGTAGTGTTGTTGGGGCTAGATGATTGCACCAACATTCCTCATCTTGCTCATCGTGGGCTCCATCTCGGCATTGCCACTTGTTCAAATTGGGG
>Locus_51826_89
GCGGAGACGCAGAGAGGCACTTTAACAAGCTCTTCGCACGCTCGTTCTATGTGTTCCGGTGTGGCATTCTCTAGAAACACCTCCTTCTC
>Locus_51825_122
TCAATCAATCCGTCGAGCCAAGGGAATCTGGTGATTTGTGTAGGGATTTGAGGGGTCGGAGTCTCTTAGTACTTTGGACTGATGGTGAAAAGGGTGGAGAAGCACTGAGTACCGTCCTTGTT
>Locus_51824_165
GACTAAAACAACAACTAGGTTCGCTATTTCAAGGCAACGGAAAGATCGAATACAGAGAATTCAAGGCGTTTATGCAAGACGAGATGCGACGAAGCGAGGAGAGTCCACATGAACAAGAGAAAGCCATCCGCATGGCCTTCAAGGTGTTTGATCAGAATGGTGATG
>Locus_51823_193
AACAATGGACAAGTAATAAATATTTGTTCGTTTATACCTATCCAAACTCTTCCTTCAGCTGCAACCATTTGTTCTTTCCAAGACATCATCAATGTGTACCATTTTAATGACCTATGACTAACTACATCCAGTGATTGTGATTTCAAAGGCCACTGTGTCTGTCATCTCACAGATATCAGAACATGATTCTTCA
>Locus_51822_127
TCTGACATCCTTGACGTACCAACAGTACATCAGTACAGGCACCATCACAGTTGAAGTTGACTTGAACTTGTGTCTCTCAGCAGTGGGATCCTCCTTCTATACAGTAGATCAGTGATTCTCAAACTTT
>Locus_51821_77
CTTTTTTATGCTCAACCACGTTCTCAAATGTAATTCTTCTGGAATTTGGATATCTTACAGAATGCTGACCCTGGATA
>Locus_51820_142
ATTTTTAAGATAGCAAACAGCATTAATCTATAGTGAAGTATTGATTCAGTGTAAATCGATTATGTCATCATCACCACGAAAATCAGCACGAAAGTTGGTCGTTAATCACTTCGAAGAAAAAAAATATAAATATCTTCTGGAC
>Locus_51819_78
TCGTTAGATGTACTATGTTTAGATGAGAAACATGACCACCAAGGATGATCTTATCTTTTCTATTACAGACGCTCCTAT
>Locus_51818_92
AGTGACGATGGAAGAGTCAGCAGTGTGGGTAATGCAATTGTAGCAGCAAAGAGGCACTCCTGCTCTGAATTAACGTAATAATTTATTGCAAT
>Locus_51817_144
TAGTTTAGCCTTATATGCTTAGCATGGATAAATGTGGTGATAAAATCAGCGAAAACGCATTTGCAACGAATGAAAATAGCCTTACTGCTTCAAATAGAGTAAAGCTGATGTTGGTTTTTTCTCCTGGAGCCAGAGGTCCTTTGA
>Locus_51816_113
CCCATTATGTATGCAAGCGATTTATCTCAGCTACTGGTGGATGTATTGATTTTTAAGCTCATGTTTATCAAATGGAATTTTGATCAGCAGCTAGGCACAGTAAGTTTTTCAAA
>Locus_51815_100
CACATTTTTTCGGTCGTTCAACAACCCGACGTATAGTCACAACGATCAAACGTCAATCTGCAACTGCTCGTTCAACAACACGTAAAAATTAACATCCAAC
>Locus_51814_127
ACGTGACTCGTGAAAGGGCTACATACTACAGCTCTTTTTGGACCCACTTAGTACTTCATGACAGAGGTAGAATCAAGAGAACAAATCTATGCTGATGCTGCGGCACAAGCAGGTGTATTGAAGCACC
>Locus_51813_95
CCAAAAACGGAGGGAGAAACGAAATGGTTTTATTCAAGCATTTTGGTAAAAATCTACAATTAATGATAATTTTTAACAATATGACATGATTACCA
>Locus_51812_151
TGTGATTTGAACCCCTGTACGACATGTTCAGAGAAGTTTATGGCACTGTGCGGCTACTATAATTACATGATCACCCAAGTCAACGTTGAGAAAGGGAAAAGACCTCGGGAAAATTCAGTCGGCCTTCTGTGGTCCGGTCAGGTCCGCTCTT
>Locus_51811_101
CGAAAGAAAAAACGCGAAGATGTTTAAGAAGGTAGACCTGAAATCAGTCCCAACGACGTGTCGAATTTTTGTAGACAGTCAGTTATTAGTTTGAATGTAAT
>Locus_51810_78
TACCAGTTTTATGTTTGTTTATGTTTGGTGTGAGCCAAAAGGTTTTCATTGACCTAGGTCACCCCAAAGTTGCCCTCA
>Locus_51809_78
ATGCGAGTAGATGTAATGACCACAGTCATTCGTTGTGTACGTTGAAGTAACAACATAATACGCTCATCTACATTACTG
>Locus_51808_96
GCAATGGTTCCTACTACAGTCCAAGCTCGTGAAGGGCTTCACTGACCCCTCCACCGTCCAATCTGGTGGCTTCAGCATTGCTGGCGTTAAATACCG
>Locus_51807_85
AGTGTCCAGAGCTCTAGACATTTAGTTAGGTCTGAATCACTTTCAGTCTTGTGGTGTCCTAGCTCCCCATCCGCTGTCAACTCAG
>Locus_51806_106
GCTTGCGTGGTCTGAACTAGGGAATGTTCCGCTGAGGTGTACACACATCGTTTTGCTTTCGTGTCCCAGATTTTGACTGATTTGTACGATGAAGAGGAAATCAGGT
>Locus_51805_92
CGGTCAACTCGGTATTTTCCAGCCAAGCGAGAAAAACCGGCAGAATCACGCTGCTAAATTTCACTGCTTGAGTGACCATTCCTTGATAATCT
>Locus_51804_115
ACCTTTAAACGGGAGTTCGCCTGCACTGATCAAGCTTCACCACCATGGCAGTACGCAACAGATCCTATGTCGCCAGCCAAGTCCACGATATCAAGTGATGAAGGAAAAACTGGAG
>Locus_51803_461
TACTGTACCACTAGTATAACATAGATTTCTCAGAGTTCAACAAATGACCTGCCTGCTGTTTGCCTGTGATCTCTATCAACTTTTGGGCATCATATTTGGTAAACAAAGCCGTTGTTGTACAGGCTTGACGTGATGTCTCCATCAGGTTGACCAGCTCCGGGTAGAAGTGAGGGTACTGAGGCAGGTCAAACCAGAGGATGTGATGTATGGCTCTCAGTTTAAACCTGTAGAAAAAATGCAATCTCTCAGTATATAACATAAAGTGGGGATGTCTTTTCCTGAAGTGAATTCTAGCATTTCTCATGTGTTTTTCTGTGTCATATTCATTGATAAATAAAAAGTCAGTCTCTGACTCTCTGAAGTAGTTACGCAGCATCACAAAGCTGTAGTAGTTGCAGTAAATCAAAGTCTGCTTGATACCAGCTGATGTGTGGTAAGGAACTATCTTTTTTTTAAAGTAT
>Locus_51802_121
GGCATATAGAAAATTGCATACTGCAGACGCCTTATCCAGGAGTTCGGACCTCGATATGACAGTCCCCAATCTACCTGGCTTGGTCAACTACCTGCCACACCTCAAAAACAAACCTGAGTTC
>Locus_51801_93
CTACTTTCCGCAGCTGCTATTCAACTGCTCCACTTGGTCCTCTCAGGGAAAACTGTTCCAGATCGACTACGCGAAGAAAGCAGTTGAGCACGG
>Locus_51800_74
CTCATCTCAATTGTTTTTAAACAAACTATTGGAGCAGAGTTCAAATGACTTACCTGCTATGGGAGGTCGAGGTT
>Locus_51799_81
AATGTTCGTCGAGCTTTACTCGAAGGGAACCCAATCGTTTGGAGGTCGTCACAACAAGACGCACATCCTCTGCCCCCGATG
>Locus_51798_73
TATTCGTCGTTTTATACGATAGAAATGTGATGAAAATATATTGGTAGTGCTTACTCCACCAGGAGATCGGAAG
>Locus_51797_75
GACTTACAAAACAAACAAATTTGGCAACACAGTGAAAAAGTTGAGTGTGTCCTGGCTGAATGTTTTGTTTGTTTA
>Locus_51796_72
CGGCTGCAAAAAGATCAGGGTTGCCTCGTTTGGGTATTTTTATACAAATATTTGTGTATCCTCATTGATTCG
>Locus_51795_71
CGAGAAACACTTACGGTGACGTGGAGGTCTACGCATGACTGTTACCGGAGAAACTGAGCAAGATGTCCGTT
>Locus_51794_71
CGAGTTACAGTTATGAAAAGTCAACAAGAGGTCATAGAATATCTCGACATCTCTGATTATTCAGGGTCTGA
>Locus_51793_83
AAAACCCGAAACTAGTTGTGCTCACATACTAGAGCAAGGGTGGCCTAACCGCGGCTCGCTGCCGCATGGGGCTCTTCTGTGTT
>Locus_51792_119
TTCTAGTAAGGACCGATTTTCAAGTTAAATCCATTTTTAGACTCAATAGTATTTGTTGCTGTGATTTTGTGTCTTTTTAAGCTAAGTTTGACACTAATTAAAGTATAAATAAATAAATA
>Locus_51791_109
GGGCAGTCGAAGTAGCCCTCTGTACTGATTGCCACTGGGATTTTGTCCCTGGGGTTGTTGGCTCGTCCTTGGAAACTTGAAATTATTCAATTGTCCCCTAGATTGAGCC
>Locus_51790_79
GACAGCTGCGAGCCAGAGAAAACCATCGTGACCAGAGTGACACTGGGACTACGCTAAACACATTCTTTTTGTCCAGGAG
>Locus_51789_136
AAAAAAAAAAAGCATATAATTTAAGCATAAGACCGAAAAAGTAGCGAATAAAAACGAAGAAAGGTTCAAAGGTAAAGCGGCATACATAAGATGGATCCGCTAAAAAACGTATATTTCAGATTTATAATGAGACAAG
>Locus_51788_139
GTATTTTTACAACAGCCCCGTGCCACTTGTATTTTGGGTGGTGGTGGTAGCAAAGAACATGGACTTGAATGGAACTATTCACCAGGAAATAGAGGCGACATCTTGTAATAGAAACATTTAAAAGTGTGTGTGTGTGTGT
>Locus_51787_130
AGTTTTTCCCTTCGGTGGGCTGTGAACAGTGGTGACGCACACTTCACTTGCATGGGGCCCTGTCATCCAGCTAATTGTTGAAAGTAGACGGAAAACAAGACAAGTTATAACAAAAATTCTTCAAAGAAAG
>Locus_51786_101
CATTAACACTGGTCGATGTACAGAGTGGACATTAACACGTGTGAGATTTACCTGACTAAAACCCTGGACTTTGAGACCGTGCCCACCCTCAGCTTTGACAT
>Locus_51785_107
TCTTCTTTGTGTCTGGTCTGTGGCCCTGCCGTCTTGTTGATATCTGCCAGCTTGGATGAGCCGATCGGTGAAGACAGTGATCCAGCTCGTTTGGCACTTACAATTGC
>Locus_51784_121
AGTAGTAAGAAGAAGAGTGTGTATCGAAGGGATAAGAGACAACACCAGCAAAGGTTGTGACGAGTTGAGCAAGGAGCCAGGATTCGAGGATACCAGGCTTTCTTCCTTGGAAGAGGAGACC
>Locus_51783_133
GTCCTGCACACTAATGTCGTGCTTATGTACCTCTTCCTAATTATCACAGTCTATTTGCCGACTCAGTTCGTGCTAACCAGCTCCTCATGCCATCATCTCAAGCACTCTCTGCATCATATCAAACAGGATTTAT
>Locus_51782_94
GGATCGATGTGGACAGTAGTATCACCTTTTTACCATAGGAATGAACATTTAGTTGAACTTATTGGAATGGAAGTTCAAGATGTTTCAGATCGGA
>Locus_51781_121
CTTAAGCAAGCGAACGTTTTCTTTCTCCAAACTAACTCCTATATATATGAACTTTTTGGTCAATGGCCTCGAACGTCAAATTGGTCTGGACTTGAATGGTGATGGATATATTGGGGGAGAA
>Locus_51780_97
AGTTTGTCATGTTCAAAATGCTCGCCTTTGAGAACTCCTTCTGCGAAGATTACATCACCGAGAAAATATTCAAAACCTTCTCCGAAGGTTCTCACAT
>Locus_51779_71
CGAACGGAACAACGGTAGCGATTTGGTGGTAGCTTCCAGCAGTCCTCCTTCTATGACTCTGCTGGCTGCGG
>Locus_51778_84
GTCGTGACCAGACAGGCTGAGTGGGCATTGACAAATCAACATGTCAAGATATCATCATGTCTTGCTTTTGGGCTGTCTCCAGAA
>Locus_51777_88
GTGGTTGTGTTTTATTGGGAGGAGTGGACCACCCTTATCTACGCCTCTGGTTACAGTCCATCCACAGTTATAAGTGTTGCGCCCCTGG
>Locus_51776_75
CCATTAGAAGCTCTTATAGCCATCATCGGTCGTAAACTTCCATCGGCGAATTTGAAAACACCTCCAGATCGGAAG
>Locus_51775_72
TTAGGACAGACTTGTACCCCAGACCACTCTCCAAGCCTAAGTACTCGTGCATGACCGATAGCGAACAAGTAC
>Locus_51774_100
CTCCACAGCTACTTGAAGTCAGCGATCTTCTCGGTCATGGAGCGAGAAGTCTGAGGAGCCATGGGGCGGCGGAGAGTGATGACACGGCGCTTGGGACCAG
>Locus_51773_120
CCCTCAACTTTTATCTGAATAACAATGTTCCCTCTGAGCTTTGCCATTTCGCAGCTATCTGCCCCACGTTGCGCAGCAGTTTAGAGTTAGTGCACAGCAATTTTTTAGGATTATATAAAA
>Locus_51772_141
GACGTAGTCGTCGTACAGGTAGTCCTTGACGTTCTTGACGACGACTTTCTTGAAGCCGTTGGGGAGCATGTGACGGGTAAGCTTGTCGTTACCGTAACCGATCTTCGGCATGCGACGCTGTCCCTTGAACTTTCGGCGCAC
>Locus_51771_122
GCTTGACTTCTGCATGTCCCCCAAGGGCTTGGCTCGGATAGCATGGCTCAGGAAGATGATCGTGAACTACGAGGAAATTGTCTTGGACGACAGGCGAGTGAAGAAGGTCCAAGCTGACCGGC
>Locus_51770_88
GTCGTAGGTCGAAACTTATAGCTCCACCTGCTACTATGACAGCGAATCCAATGTCCGCTTCGATGGGTGGTGTTCAACCAACGATGAT
>Locus_51769_77
AGGCTAGACAAGGGAAACGGCTTTACCTTCTGATCATTTTCAATTTTATATTTTTAAATGGAGTCAAGAGATCGGAA
>Locus_51768_106
GATCTACAGGTGTGTTTTGACAAGCGAGTTGACAGCACAGAGTCTGTCGTTACCCAATTATCGCTCTTCAGCTGCTCAAGTTATGGAAAATCTGCCCCGAAAAACC
>Locus_51767_86
TTGACCGACCGTACACAGGGATTATGCTTGCCTTGAGTGCCAGTTCCCCCATCTACAGAGGTTATCTGTCTGACATCGACACCAGG
>Locus_51766_99
GGCCGAGAAGGTTACGGTCGTGGAATTGATTGGGTTTCCTTGGCTCAGTGGGCACCCCGATTCTGAGGATCTGGTTCAGCGCCTCGAGAAAAAAAAAAA
>Locus_51765_91
CCAACGAACAGCTCTGAAGTTGTCGCAAAAAGTATTTCTTTGAACTTGAGACTTCATGTTCTGATGAGGCTCGGTTTCTAGATCGGAAGAG
>Locus_51764_96
GGGTCGGTCTTTCGGCTCTCTGAAGCCCACAGCAAAGTTAACTGCACTTCCTAGAAAGTCTGTCAAATTTTTTGCAGAAAGGCATTCTTCAATGAA
>Locus_51763_137
AAGTGAAAGAGGAACTGTCGTTCAGCACCTTGCTTGATCGCGTCGGACATGATGAATATTGGTTTTATTTACTCGATGATAAGTAAAGGCGTAAGAGGGTGTGCGTGAGTTTACTTGGCGCGAGAGTGAGAAGGAAT
>Locus_51762_93
GTTGAATGGTTCTCTAGAGAGTCACGCGCACTTCAACGTCCCGAGTGAAGACAAACATTCGAAAATGTTCATGACAAGAAGTGAATACGATCG
>Locus_51761_106
TGCAACAACGGCGCTTACTTCGCATCGCCATATTTGGTTTTAAGTTGACCATCAACATATTCCTCGGTTTGCTCCATGGCAATGTTCATGTAACCGTCCAAACAGG
>Locus_51760_123
TTTTTTCCAAACCCTTGGACTGGTTTAGACAAACTTTAAATTGTTATACTATAAATTATAGTTATATTAATTTTTGAAATTACTTTCTGTGGCATAGATATTAGAACATTGTAAAAAAAATCT
>Locus_51759_101
GCTAGTAAATAAATGTAAAGAACCAATGGATCAGACGTCATTTGACAACGAAACCGTAACATCTGTTTGAATGTGCCAAGTATTGACAACGTGATTTCTCT
>Locus_51758_78
AAAAACACACAGTCCTTGAGAAAACAAAAGAAATTCTTCTGGAGAGAGAAGGGACATGGCGGAAGTATTAACGGCGGG
>Locus_51757_174
GGAGGCTACCGACAGGCACCTCCGACGCTGAAGACCTTGATGCCCAGCAGCTCAGCGAGTTTGGTGACGATGACGTAGGCGAATGCTGCAAACTCGTTCACACTCATCAATAATACTCCCCAGGTGTACAAATGCATGTCCGAATTGAACACGCTGATCACCAAACAGCAAATC
>Locus_51756_153
GGCTCTGGTCGACTAGGAATCTGGACAATGTTGAGTCTGGAGGCAACTTCGCTCCTGTCGTTGTCAAACACGAAGCAGTTAAGGACCTTTTCTGAGTCCATCGCTCCTGGCTTTGGAGTAATCAGGGGATAGAAGGCATAGGCTATGTCCTTG
>Locus_51755_105
GGTCTGAGAAGCAGTTGATCCGAAGGTGCCCATACCGACTCTCAGTACTTTACGTCTCTCTCCCCCTACACAAACCAACAGTCAACAAGTGCTTCTAAACGCACC
>Locus_51754_165
ACATATCTGTTATTTTGAAGTATTGTCATTCGAAATAAATCATTTTGTTTGTTTGCTAGTAGACCTTATGTTGTTTTCAAATATCATTTATATTTATGTTGATAAGTATAATTTTAGAAAAAGTTTACATTTTTTAAAACATTTTGTCTGTTCAAAAATTGTAGC
>Locus_51753_91
ACATATAGTAGTGTTCTCCTTATTTTCAATGCCCAGTACGCTTTAAAACAACAGGTCCGTAGGGCGATATCAGTCACCTGTTGACCTGTTG
>Locus_51752_135
GGTCGTGTGACACTGGTAGTAGCCAGCCACTAAATCACACAGGTCAAGTTAAGTCACATCCCTCAAGCCAGCCACTAAATGACCGCAAGTCAAGTGAAGTCACACGTCAATGATTACATTTCTTGAATACACCTC
>Locus_51751_72
ATAACAAACATTACTACCGCCATGAGTATTTAAAAAGCAGTGGCGTAGCTAGGGGGTGGGGCGGTCTGCCCC
>Locus_51750_72
ATACATAACCGTAACCTGAGATTGTTAAAATGTATGATTGTTGTTTTAATTCAGAGGATGGCCTATGACATC
>Locus_51749_105
TGTGCTGAGAGACGGCTAGAATTGTGTTCATGTTCGATCAGAATTGACCGATGATGGAGACACAAAAGTAACTGTTTGGCAACGCTTATATATTCCAGATCGGAA
>Locus_51748_85
TTGTTGCTGGTCTCATCTGGACACACAACCCAACCATTTAGGCCTACCAGTGGTTATCACCTTACAACAACGACCAGAGTAGACC
>Locus_51747_237
CGTGGAAGAAGGTGCTGTAGATGGTCCCGGCCTACATGTGAGAAGCGCGACATTATTTGGTGCAAGGCAGGCTGCACCACCGTAAGAGTGCTTAAGAGGAGGAAGATTTGTTGCCATTTCCATTGCTGGACGAGTCCTTCTTGCCATCATCTTGCTTTTGCTTTACGGACCGACGATACTTTTCCATGGCTTCCTTTTCACGCAGCCGAATGTACCGTTCCTCTTCGCCTTTTTCCC
>Locus_51746_77
CACAAACAACCAGTTCCGAAGTTTGGCCAGGAGTTCTTCCTTTTGAAGCCTCACAACTGCCTGTTCAGCCTTCTCTT
>Locus_51745_87
TAGTGTCGGCGTCTTTTCTTTGGGCAATACCGAAAGGATCCTGCTGTAAACCATCCTGGAGATATCCCACTTGTCCCTTCTGTTCCC
>Locus_51744_119
CCTTTGAACAACAAACAAATACCTTTGACCTTAGCATAACATTAATTGATGATAAAAATCTATATGTACTTCATTTAAATTAGTTTAGAAATCAATATCAACAATGGTAACTAGCCAAA
>Locus_51743_147
GGCGGTCGTTCTCGCAAAAGAAGGGGCTTTTGGATGACGTTGGTGTACACATCGTTGACAGCTTGGTTGAGGGCATCGAGGAAACCGCGCATTTCAGCTTCGGTGAGATCACGCTTGCCAATGCCGAGGTTGATACCGTTGACACCG
>Locus_51742_125
GTCGGACACGGCGTCCTTATGCAGTAGCCTCCGCTCAAGTAATACCCAGAATAGCAGCTTGTGCAAGCATAGCTCGAAGTGCTGGTGCAGTACGAGCAACTTGATTGCCAGCAACTGACTCCAAG
>Locus_51741_87
GTTTATTTGGGTAGTAACTACACACACCTAATAAAGATTTCATAAAACTTGGGTCAATTATTTGTGTCATGTGGTCAGCTGGGCTGG
>Locus_51740_319
CCTTTGAAATTCAGCTCTATAGGGTTTAAGAAGATCTAATACCTTATATTCTTACAACTTGCTCAGTTCCGCAAGAAACAGCTAAAATTTGCCAAATCTGGAATCCATGACTGGGGCCTTTTTGCCATGGAACCAATAGCTGCAGATGAGATGGTGATAGAGTATGTGGGTCAAGCTATCAGGCAGCCAATAGCTGATCTACGTGAGAAGCATTATGAGCAGACTGGTATTGGCAGCTCCTATTTGTTTCGTGTAGACCACGAATCCATCATTGATGCCACGAAGTGTGGAAACCTGGCCCGTTTCATAAATCACAGCT
>Locus_51739_105
GAGATAGTACATGTTCCGACTGTGCAGCCGTCCATGCGACTGTCAGCTTCTTCGGCCTGTCGAGCTTTGATCAAAATAACATGTCAGAGTATGTGAGAGAAACTT
>Locus_51738_117
GCGAGGATGTTACATGTACACTCAGGGTATTCTCGCGTTGGTCATACCAACGGTCAACAACAGTTGAGCGGCGTAATACGTCAGCAAAATGACTCCCTCGGCGCAGCCAAATTCCCA
>Locus_51737_74
CCAAAGATATAACAACTCACGTTGGTTCTATAGATGTATTTGTGTTAAAAATTTTATCCATCAAAATCCATCCT
>Locus_51736_150
GAGTGGAACCTACTACGATAGTCTCGTCATAAGTTTCGTTATGGCGTTTCTCTTGCCTCTTGCCAAAACTATGGTGCGTTATAGGGACCAGAATGGCCATCAGATTGAATGTTTTATCGCCCCTGACGCTAAAACATGGCTGCCAAATCT
>Locus_51735_115
CTTCTTCTAGACCATGCTTGATCGCCTCATTGATGACATGGTTGCCTTCTGCCTCAAGTCAGAGGGTGCGTTTGTGTGGGCGTGCAAGAACTACGACGGTGATGTTCAGTCGGAC
>Locus_51734_153
ACGTGACCCTCGGGTGATATCGATTCCATAGCTCTTTTTACTGGTGCTGTCACATTGTGATAGGTCTTATACTCATCGTCCTGCCGTCTCGGAGGTCTCCACGTCCCCAGTCACAGAAGGAGCAGCATGAAAACGGCATTGAGAAACCACAGC
>Locus_51733_114
GAGAGGAGGTCGACAACAGGATTTGCAGTCTTCGTTGTTCTATTTTTAGCCAAAAAGCTATTCATTATGTATCCAGTCCCCTAGAACCAAAGTGTTTTTTCTCATGGTTCCAGC
>Locus_51732_89
TTGACTCTGTGCCAGGTCTGACCTACGGGTGGCAGCAGTCGAGAATAATTCACAATGGGCGAAAGCCTGATGGTGCAACGCCGCGTGGA
>Locus_51731_78
TTGAAATCCGTTCCACCACCTGATTTGATGTAGTGGTACTTGAGTGTAGTATATGGTTGTACAGGTGTGGGTCTGTAG
>Locus_51730_79
TGCGAGCAGGCTAGAGGCGACTCGGTGCCATTCGTAAGCCACCGGTGTGAAACGAGACCTTCGCATATTGACCGTCAGG
>Locus_51729_85
CCCATTAATTGGACTATAATGTCACTTTGAAAACAAATAAACTTCCTTGCCAAAGTATGTCGTACCCCTTCTTGCACTTGAATTG
>Locus_51728_110
AATTTTTCCTTTTGGTTTTTGGCGAATATGATGGTTGCAGCATGGACCGCCGGACACGTCCACAAGAAGTACTGATGACTTCACTATTGCCTAACACAGATGTATTACCC
>Locus_51727_101
ACCCCTTCAGCCCCAACCACTTTAATTTCCAGCTCAAATTGTTCTTCGCCAAACGAACTTACTGACCCATGTAGGTGCTGGGGTCAACGGTGGCGGGCAGG
>Locus_51726_116
TCGTTGGAAAAACCGTCTCATTGGTACGCAAATAGTTAGCTAAGAGAAAGTTGCCTAACTAGTACACAAATAGGATAGCCAAGACAGACCTACATAGTACAAATACAGGTACAAAA
>Locus_51725_142
CTCCGTGAAGGTGAACTGGTAAAACTCCCAACACAACCCGACCATCAACATTGACAAAATCTGGACCTTGGTGTCTGAACAACAGAGGAAGAGAGCCGCTGAGAAGAAAGATGGTCTTGTCCCCGTGATTGATGTTACCAAG
>Locus_51724_84
AAGGCTAGACAACTAATAATAATGTAAGTATCATGTCTTCGCTTTGATCATAGTTAATCGACCTCAGGCCCAGAGATCGGAAGA
>Locus_51723_81
GTAAGTTCTTTGTTTAGTTAATGTGTCAATTGTTTGTCGTCTGAGAAGTTGTTGCAAAAGAAAAGAAACGAATCATTCGAT
>Locus_51722_91
GCGGGACCCCTGCTCGCGCCTAACCATCACGAGGGGGACGGTCGCCGGCCTCGCGGGGTGGGCGCTCAGAGCCACCACCAAGACGCTTGGG
>Locus_51721_179
TGTCAAAAATAACGGTATCCACACCACACCGGCCGCCACCCACCTACCGTTGTCATAACAGAAGAGAGGCCCGCCAGAGTCGCCCGTACAAGAATCTATTTTCCCATCCAGTTCCCCTGCACACAATTGTTTTGTAGGGTCAGTGAGGTATGCTTTGGGAAACAGGGTCAGACAGTCGG
>Locus_51720_134
CGTCTTTATGACCACGTTTGACTTGTTGTGATTATCTTGCTGATGATGCTGGATTCTTGTGCCCAAACACACCAGTTAATACCCTCCTTTCCCTCCCTGAAAGACCAACTCAAGCTCCAAAAACTAGACCACCG
>Locus_51719_117
GAGGCATGGAGGTGTTGCGTAATCTAACCTCTCAAACCACATCAGACAATAACACCCGGGAGACATTCGTCTGCAGACTTGAGGATCCCCGATTCATTCAAGACAACGGAGTCGTGG
>Locus_51718_76
AACGTAGCAACCCAACGACACGTAAGTGGGTTAACCAATCGCTTTTAGGCTAGAACGCAGTGTTCCAGATCGGAAG
>Locus_51717_128
GACAATAACAGAGACTGATTTATAAGTCATTTTGCATTAGATCAAGAATCATGGGGATTTCTACCTCTAAATTATGGTTGGTAACAAAAAATCTGAATAAAATACAAACCAACGAACACGCCGATGTA
>Locus_51716_92
ACACCCCGTCGAGTACCCCCACTGGAGGGCAAGGAACAGGAGGCAGTGGCACAAAAGGTTCAAATCTTGTTTCATATGCAAGAACAAACACA
>Locus_51715_133
GTCGGAGTGTGTTCCCATTGACTATTCCTTCATAGAAGTCCCCTGGCTTGTATATGGCTTTGTGCAAAGCCTGAAATAAGTGAAAATTTAAACGTTTATATTCCAATATATCATCTCGGATACGTGGTAAAAG
>Locus_51714_99
TCCTAATGAAAAACCCAATGGTTACCTTAGCTGATATCGAGTTCACCGCCTTCAGCCACTTCTTCTCTGCCTTGGTCGCCTCCCTCGAGCAAGCAGATT
>Locus_51713_116
TCGGTTGTAGTGGTAGAGGGATTTACTACTATAATAGAATTCCAAACAACATCAATAAAATAAAAAGGAACTTGAAGAAATAACACGTAACTTCCTTAGAAATTTGTTACTCCTTT
>Locus_51712_104
TTATGTTAGTCAACAACGTCCAAAACAACAAAGATGGTGGCCATATAACGTGGAATGACGTTGAATTCAGCGNNNNNNNNNNNAGTTGAAAACAAGGAAATAGT
>Locus_51711_98
TAGCTTTCTTCCTCTAGCTGGACATTCTCATGGCCGAGATCACCACACGGGACACACATCAAAACAATAACGACGAACAAGATGAAGAAGAAGAAGAT
>Locus_51710_121
TCTATGTATACTTTACTCTTGAGCTCGTCAAGTTCTAACAGAGTACACTTGTGACGAGGTTGATTTGGGAAAATACCCCGTTGTGACAGGCGACACTTACAGCCGTTATGAGATATGTACA
>Locus_51709_241
TTTACAAGGATGAGAAATTGAATCAACTGAAAATTGCATTACAGCCTAAACTTAGGTTGTTGCTGTTGAACCAATTTGAGACAGCGGGGCAGGCTATTTCGCTCAGAGCCAAATGGCTGATTTTTGGCCCGATAATACAAGCTTTGAGATTTGCTTAGATACCTTGCACCAGTTAATTAGATTTCTTCTTGCATTTCTCACTCATCTTGCCATTTTAATGGCATTTCAAAAGGTAGAAGCG
>Locus_51708_114
AGAGTTCCCTCCTTTTGGATATGATTACCCACAACAATCTGAGTAAGAATTTAGCAGACAAAGATGGGCTATTGGAACAATTAAAGAGGGAACACAAAATAGAACTAAATGAAG
>Locus_51707_145
GTCGTTACTTTCGAGTTGCCACGAAGGTAGTGATGGAGGGCCAAATGTGTCGCTGAGCCTTGAGCCGGATAAAAAGGGTACAGAGGTAGCTTTGCAGCACCTGCAGCTCAGAGAAAATGCTTCTTCCCTTTTGTTTGAGTCCCTG
>Locus_51706_72
TTCGCTAGCTTCTTCTTCCCCGCGTTCAAGACGGCGGACTTCTCCTTGCTGGACATGCCCGCGCTGAAAAAA
>Locus_51705_87
GAGAAGGCTAGATTAACTGATACGAACAATATCAACAAACACCATACTATAGTCCTGAATGCGACCTCCTTGTAGATCGGAAGAGCG
>Locus_51704_71
TATAATTTTTTTTGCATTTTAACCTAGTTTTTTACAATAAACCCTTTATGTACATAACTAAAAGAATGTTC
>Locus_51703_81
TATTGTCCCATTATAACTATACTTCTTTTCTTCTAACATTTTACATCTTCTGCAAATAATAGTGACAGTAAATTAATACAT
>Locus_51702_79
CTCTTCACGACGCTGCGCACCTCGTGCAATCACAGTTAGACAGAAATCACTCACTCACAAGTTGTTCGGTGTTGCTTCA
>Locus_51701_161
TATTTAAACACGTACTATTAATTGCTTATCACTTCAGTAGCGAAAGACCATTTAAATATCGATGCCACATCCTAGTCCATTGGTGTCAGTGAGCTCATTGTCGGCGTCACTAGGGAATGAAAGTATCGATCCTGAGTGAACGCTATTGTGTTTGGCCCGGG
>Locus_51700_95
CCCATTATGACCACTTTGTAGTCTTCTCAAGCGAACGTCGAATCGATCGAACAAGTGACCTCGACGGATGTGCAACGCAACACCGTTCACGCAGA
>Locus_51699_100
CACTCTAATAAACGGCTAACCTCTACTACAAAGTTAGAACTGGCCGTGTAATTCCATGATTCTGTTGCAATGTTCACTAGGTCAACTTTGGCGCTGGTAG
>Locus_51698_76
AGAAGGCTAGAGCAACTGAGAGTCATGTCGAGTTTACCTGAAAATTATCAACCACCCGATCCGAATAGCCTTCCAA
>Locus_51697_83
CCCATTCGGGTGGTGATTTTGCCCTGTGCGCCTCTCTCAGTTATAGCATTAGTTTGATGTTATCTCTGCGTTGAGAAGCCGAT
>Locus_51696_115
AGAGACAGCGCACACGTTCTACAAACTGGCCAAGAAGCAAGAAGCCGAGCACACGCCGTTCGAGTGTCTGAGTATGCGCTGCGAAATGTTAGAGGCGGAAGGAATCCGACTGAAG
>Locus_51695_78
TTATACGTTGACGAAGATTCAGAGTGAAGTCAGTTTCAAGAGCTTATGGAGGAAACAGATGTGCAACCTGTGTTCGTG
>Locus_51694_119
GGGCGTACAAAAGTCCTAACTTCAGTGGAATTTCCATCTCCCTGAAGATTCGTCGTTCAAGTAAGACTTTCTAGTGTACTCTCAATCATTGTTCTACAGAGACACACTGTATATGATTG
>Locus_51693_88
GAAGGCTAGAGCCTGTATACATTCTTTAAACGAGCGAACATTTGTTGGAATTAAACAAACATCATCCACACCAGAGCCGTCTTTACAC
>Locus_51692_106
GACTAGCTTTTGAGTAGAGTTGTAGAGCGTTCGCCATGATGATAATCATCACGCCTAGACTTATCCATAGAGCTACAGATGAGATCTTTGCTAATGTACTTCGATT
>Locus_51691_77
AAAGGTACAATACAGGAACTTATCTCAGACCAACTTGCCATGATAATCATGACCTCAGAAAAACTCCGTCTGTCCTT
>Locus_51690_124
GTCACCTATTTGGAGGCTCATGTGTTCAATAAACGTGCTATGATTCCTTGAAAGGTTTACTCAGCGTTTACAAACCTGGAGCCATGAGCGTTCGCACCCCAAGGGATGGACAAAGGTATGTCAC
>Locus_51689_72
AAACTCTAGGAACTGTTTGATAACAACACGTTTTGTGGTGAGGACAACAGACCCCATCAAGACATCAGGATC
>Locus_51688_80
TACTATCGGTACTTTCACCAGGGGGCCTCGGCCAGTTTCATGGTCAGTCTGTAAGACACGACCCGTCCAAGGACAACGTC
>Locus_51687_167
CGTCGTCTAATGGGGTCGAAATATTTCTTTAGTCATTGCACTCAGTGTGATTGAATTTCTTTTAAAAGTCACTTTAAATTAATTCACAGAGGCCGGTAGGGTGACCAGCCAGATCCCTTGCTTTGATGGACACCAAACCGCAGTAGGATATTATTTGCGGTATAAAA
>Locus_51686_79
CCTTTATACCCCCGAATTTTGTCACAGTAACATAGTTACCATCCCTTGAATGTATGTTTGGAAATATGGGGGCTTAAAA
>Locus_51685_95
ACCACAGGTTACTACAAGTGCATAGGACGTTTGTAAGAGCAAATATTCGACTGCTGTTGATCCTAATCGTCGGAAGATGATGAAGCAGATCGGAA
>Locus_51684_96
GGAGTTACCCAGTTCCATCTCCAGGACCGTTTCATCAACTGGATGAAGTCTAGCTCTACCAGCAACTTCTACAAGCTGTGGGGGAGAATCGATGAG
>Locus_51683_72
ACTATTCCCAGCAATGTCCTGAGTGGACAGATTCCAAGAAGATATGTTTAAAGTGTTTGAGCAGATCGGAAG
>Locus_51682_100
CCAATCATGGAAAACACCGGTCCCAGGTACTTGAGCATGCGCTTGAACTCTTGCCAGCTGAATCGACCATCATGGTTCTTGTCGAAGGTGTACATGCAGG
>Locus_51681_115
TGTTGAATGGTTCTCAAAGGGCCTGCCAGTAATCACCAACATCGACCTCTGATCAAGATTGTTCTGTCGACTACTTTGCACAACTATGCAGACAACGTTCGTTCTCATCGCTGGT
>Locus_51680_105
CCCATTAGAGCGGACGCTGGTTCTCTAGGGCAGTGACTCTCAAAACGTTTCTTGATTGTGCCCCAAGTCCCACATTCGACTTCACGAAAGAATCCCTGCCTCACC
>Locus_51679_95
ACCTCTTATAGAACGGTCAACTCTTGGCTGAGGTCTTTTTTTCCGATGCCTATTAAAGCAGCTTCTTCGAGCAGCTTCAGCAGGTCGATGTCCTG
>Locus_51678_165
GGCTTTACGTCTATCCTCTGGACCAAGCGCCACTCATAGAGCAGGTGAAGGACATCCAGCGATTGAAGGCGATCCTGCTGACGCACGACAAGGTGGTGATCCACTTCGCGGCAAGTTGGTCAGAGGCGTCTCAGACATTCCAACCGATCTTTCAGAAAAAAAAAA
>Locus_51677_72
AACTCTCTGAACTCCCGCCGAATCTCGACGGAACTGAGGGGCCGAGCAATGTCGGCCTCGGCGGCAAAGATC
>Locus_51676_85
GACATCGTCATAATAATGACCGATGGGAGATCAGAGGACACTGAAAACACCATAAAGGCGGCCAGCAAGCTAAAAGCTGCGGGTA
>Locus_51675_122
GTGCTGTCCTGATTGGCACAGGACTAACCGCGAGTTGTGTCACATGATCTTGTGACTTTGAGCTAAATCCTTGGGTAAAGCAAAATCATTGATAAGCGTAGCACACAATAATCTTCTGTATA
>Locus_51674_84
AAAAAAAATGAACACAAAGATACAGCAAATTGAAGTTATTTATTCAGTAAAATGACTCAATAAAAACATCATAGACACTCGAAC
>Locus_51673_86
AATAAATCTTGAGAATTAGTCGAGTCTGAACAAATTTTTAAAAATTGACTATTAAGCATCAATGTTTACTTAATTCTTAGCAATTT
>Locus_51672_288
GAATCAGGTAATCTGAGTTCAACATGTCTGGCAAAGAACTGCTCTAACAGATGTGTGCCAGAAAATACAGAGTTTTGTAACGAGCCCTTGAGTCAATGTGTTTGTAAAGCTGGAATAACAACCAAGGACTGCTCTGTGGTGGACAGCTGCCTCAGCAACCCATGTCCAAACAACTTACTGTGTCAACGTAAGGCTAATGGCTATGAATGTTTGTGTAGGAATGGACTGTCAGTAGACATTGTGAATGGATGCAGAGATTGTAACAGAACACTGACATCAGGATCAGGA
>Locus_51671_115
GACGACATGACCTTGTGTAATTCTTATGATGAGTACCACATGAACCTAAATGAATCACTCGTGTTACACTTGAAAACATCACACGAGGATAACCAAAACGTTTCTGAGCAAGAGA
>Locus_51670_100
AAGGCTAGAGGCCGCTACTGCAGAAAGACGTTGATGTAGAGCAGAGGAAAGCCCAGTTTGAGGAGTTCAAAGACTGGCTCAGGAGCCAAGAGATCGGAAG
>Locus_51669_108
GATTTAGACCCCCACTTTAATATGTGCATGTATAAAAATAAAGATTGAAGCAGTTATTACTTAAGATCAATATTTAAATTCAAACTATGTTGCTATGCCTATTTATTT
>Locus_51668_100
AAAGACTCGACCGAGGAAGAGATCAAGGAAGATACTACTGTCTTGTTACACTGTCAAATTTTGGTCAAAGTGGCAATTATATTTGAGCATCACAAACAGA
>Locus_51667_103
TTCTTCTTCGGTCAAGTAGTGAGGATGACTTTGAGCAGATCTCACAAGCGGACCTCGCCGGCATAGACGAGGATGTGACACAAGGTACCACTAGCTCAGCAAA
>Locus_51666_97
AACAAGTGCACACGGAAAGGCTGTACATTTGATATCACAAGCATCACAACGTACTAGTGCTTGTCTGCAAGCTGTTCGATCGTGGTTTTCCAATGCG
>Locus_51665_95
GCAGTGGTACCGCTAGTAGCTCTTCTCAAATGGTGTTTAGTGGACCAGCAGTTATGCCACACAAGTTATGCTTTCAGTCTATACACATGACGTAG
>Locus_51664_156
GGACAACACGAAAAGTACTTAGGCACGCCTGCGGTGCCTCAGTGCGGCTTCAGTCGTGGCGTCGTGCAAGTTTTGAACGCCACCGGCACCAAATTTGACGCATATGACGTCATCGCTGACGGCGAATTGCGCAATGAAATCAAGACGTTTTCTGAT
>Locus_51663_111
GATTTTAGCTTGGGGTCTGGTCTATTTCAGAGGTCGGTCGCTCTATTAATTTGACCAACGAAACTGCTGACAAAATTCGTTCTTTTTAAAATTATAATAAGAAGGCTATAA
>Locus_51662_215
CGTGTAGAAACCCTTCAAGTGCAAGGTCATCAAGTTTATGAGAACCTAACAGTGCCTCTTGATCAAATACAGAATTGTGAATACCATCCTTAAAATGTGATTCAGCCAATTTGTGTGCCCCGTGATCTTGGATTTCATGGGTGGCCTCCAACAAAGCTATATAAGCTAGCAAGAAGGCTGTTACCAACATCTTTTTTTGTGGCCGTGGGCCGTGG
>Locus_51661_71
TTATGTCTTTGAAGTTACCTAACAACGGATTCACTCTGTCCAAGGCCAAGAAGTTGAATAGTCTCATCAAG
>Locus_51660_153
GTTACTATAACCGAAATTCTGGGCTAAAAGGTTAGAGGAGATAGGTTTCAACCCGCCTAAGAAAGCACACACAATACTCACAAAGATTGAAGTCCTTCAACCTGGAACATTTTTCAATCTTGTCGGCGTATTTGGATCGGACCATGCACCCCA
>Locus_51659_87
CGAAACGTCTCCCGATGAATAAGAGAAACGAATGGAATATTTAAAGGATTCTTTGACATTTTGCTAAAATTGTATGTGGAGACCTCA
>Locus_51658_80
GTCAAATAAGCAGATAGCTACATGCAAGCATTTCTTCTCTTATTATTACTTGGCCAATCATCGGCATTTCTCGGCTCACT
>Locus_51657_278
AATTATAATATCAATTTGACTTTCTGATCATGGAATGCAAGGTTATATAATATTGTGTTAAGTAGAACACAATATATATTCACATTTAACATTGCAGATTGATTTGAAATCATTACATAAGGCTACTCATATTATGCTAGTGTTGTATTTTGTAAGGTCTAAGATTATGGCCAGGTTATTTTGTCATTATGTGTGATATGTTTTTCTTTGTTTGCTTCGGCAAAACAATATTTTTGACCAGCGAGGACGCTGGCATTCAGGGGCCTGGGGAAACTGTA
>Locus_51656_89
CGCATACGGTGGTAATAGCCTCACAACACGGACGAGAAGGTCACGAGAATTAAGCTTCCGAGTGGTAGCAAGAAGGTTGTCTCTTCCAC
>Locus_51655_92
ATGCTCTCTATCGTCATAGTTTCTAGCCCTTTACCGACCACAGATGTCCTCGAGTTCATTAAGGGCTTTCGCACCTGGCATTTATGTTTATG
>Locus_51654_113
TGGAAAGCGAGCTGGACATTACCCAAGCACCAGATCATTTCATAACACCGAAAACCCCGACAATTAGCCACCAAGAGCGGACGCTAAGGTGAAGTCAAGTCGAACTGAATTTG
>Locus_51653_85
AAAACCCGGTTTTGAAAATTGTCCACAAGAATGTCAATGAATCATACAGAAGGACAACTCAGAACCTCTATTTCAGAGATCGGAA
>Locus_51652_73
GACTCTGAATGAGGAGCAGGTCGCCGCCGGCCTTCTTCTTGGCGGCATTGCGCTTGACGCGCTTGACGCGGCC
>Locus_51651_107
CTAGACCCATTATGTTCGTCAAATAATTAGTGAATGTCATTACCTCGCGGAGCTGCTCTGACCTCACTTGGTGGAGGTGCTTTTTTCGTTGTGGGGCTCATCTATGG
>Locus_51650_233
GTTAACGAGACCCCCCGTAGATAGCGTATCCTCTGTCCCACTTACTGTACGTAATGGAATTCTCTTCAGTGTTTCTGTCAAAATCAAGTTTGATGGTGCTGTCAAGTTCTGCTGTCTTGATATCATTGCTCCGTCCTTGAGAAGCCATTAGTTTCTGTTCCTAGAGACATTCCAAACTGCTGAAACGGTTTCACAAATCTATTTATTATTTATGTCAACGATATTGGCAGTGG
>Locus_51649_92
TTGATTTTGACCCAAATTTCTGCTCACTATTTGCCAATAAATTTTCAACCTAAATTACATCTTTGCATCAAGCGGATGATCCCGCAGGGACA
>Locus_51648_115
AAACTCCTAATCCTGACATGTCCTTGTAAATTCCTCCAGTGTAAGCTTCAAGACCATCGGTGGCTTCAATTCCACAGCTAATTGGTCCACGGGCATAGATTTCGGCTTTCATTTT
>Locus_51647_142
CCCATTAGTAACCACACTATGCCAGGCATCCTGTTTACTTACCCTTCATAAGGTCTCAGTTGACAGCAGAGGCAGTGGAGGCATTTTTTATTTCATACTTCAAGGACACCACTGCAACTGAAAAGAATAAAGTTCAAAGGTT
>Locus_51646_137
GAAAGATGTGAGTTACGACAACAATGATACTTGGGAAGTGCCAAGGCAGGAGTTAAATCAAAATGAGCTCAATCTATAAGTGATAGCGATGTCAACGGGCGATGTTGTTTCGCCATGGTTGTCCTTTTTAGATCGGA
>Locus_51645_95
CAAGCATACAACGTAACCCGCGGCTTGTCCGCCTTTGCCTACCTATCAACAACTCTCTGTTAGCATTCTGCTCTCCAGCTGCTCCTGCTGCTCTC
>Locus_51644_144
GCTGTTGTCTGATTTTTAAGATGCAAGGTTGACAATCTTATGAGAACAGCTGAGGGTGAGGCGTCTTGTGGTGCGTACAGCTGTAGAGAAACGTGGGCGACAGGACAGCTTTTAAACAACCCTCGTCAAAGCTTCACTCCTCGA
>Locus_51643_89
GTCGTCAATTGTAGAGTAACATTGATACATGGTAAAGTAAATAGAGAGGCTACACATTTTTTAAAAACAATAGCATAGCTAGCTGGCGA
>Locus_51642_99
GCCGAGTAATACAGGAATCGACGAGTCTTTGTAGAAAGTTACTCCCGTGTTTTTGGAAGGAGACAAAGAATAAGAGGAGCTGTCTCATTAGATCGGAAG
>Locus_51641_89
GTTTGTAGATGCCGATAAGTCCGCTGAAGGTGAACCACTTCTGGAGAAGTCTGTTTTCCTACATGCCCCGTGGGACCACCGAGAGATGG
>Locus_51640_136
TAAAGAACATACCAACATTTATAATGTAACTGATGTGATTTTGACAAATATATCCCACTTTATTAATTACGAGCAGCATAGCCCGTCCAAGGACATTCCNNNNNNNNNNNNNNNNNNNNNNNNNNNNNNCTCCAAC
>Locus_51639_79
GAAGGCTAGAGAGACTAATGATACGTTGTGTAACCCTGGCTGTCCACTGTTCCACTTGCACCATGAGTTATGCTTTCTA
>Locus_51638_108
TTATCGTCCCCATAGCACACATGGTGGGGGCCGGTGGCTGTATTGTTGAATATACAGGCATTGCCCTAATCTCCATTGATGGACGAGTCCAACCAGTGCGAATAGCTG
>Locus_51637_73
GTTACACGAAGACCGACAGTGTGCGCACAATGAAAGAGGGGACGTTCACGACGCGCTTGCCGACGCGGATGTG
>Locus_51636_135
CTAACAGTGTAGCGACACTTAGCTAAGGAAATGTAAACATTGGAAATCGACAGGAGAGCTTGTGCAGTCCGCCGCCACAAATCATTTGATCCAAACGTGAGCAGGTCATCAGTGGGTTGTCGCAGTGGGTGCAGG
>Locus_51635_138
AGCAAGACTCCCAATGTCTAGCAACACACGCCACCTCTTTAAGAGGGCTTTCCGTGGAAAGGGTCCCACCCACATCTCCACCTACTTGACCACCTTCCGTCTTGGAGACCACGTCACCATCAAGGCCAACTCTTCCAT
>Locus_51634_90
ATGGAGTAGAAGAAGTAGGATAACACTGTCATCATCTGATGCTCTACCATTGAGTAAGCAAGATTTCGGCAATGTTGTTTTGTTGAGAGC
>Locus_51633_179
CCGGTTTCAAGAACTACGGCAAGAAGGCAGTGAGGGCGTTGACGACATCGGTGCGTTGGTACTTGGCCGAGTCGCTGGGGAGGATGTTTTTGGCAGCCAGACCGGCAAAGGCGTTGTATTTGGTGGCCAGAGCGAGGGTCATGCGGATGTAAGCCACCTGCATGTCCTTTGGAGCGGCC
>Locus_51632_87
AAGGCTAGACAGTTTCTCTGCAAAGCCCATATCACCATCGGACTCCTCCTTGGGCTCCTCCTTCTTGGACTCCTTGGCAGCAGCAGC
>Locus_51631_88
AACGTGTGCTAGACTCGAAATGGGAAAATGGAGATTTTGCAGAAAGTGAATTGTATGAAATGATCCGTTGCACAGCTGGAGACCTGGG
>Locus_51630_88
CCTTAAGTCTTGGCGAGCCCACAAAACAACATACTTGTAGGAGAGCTTGGGACACCACGGGACGATGAGAGAGACCCAGAGGACCAAA
>Locus_51629_102
CGTTTCTAACCTCAATGACACAATGCAATTTGCCCTGGATTCGTGTTAACCCCACTTATCCAAAAACAAATCGACATCATTCGTGAGAAGAAAGGAGTTAGA
>Locus_51628_140
AACCCTGGTCGGCTACGTCACATTCAGAAGTCTGGCAAGGGATGGTACAAATTTGAGGCTGGTTTATCTCCCTTAGGCACAGCTTTGCTTGTGAACAACGTCAACCTGGCCCAGTATTTCTTAGAAATGAGATTTCTCAC
>Locus_51627_115
CTCGTAACGGTATTCTCGTGCTGCTTGAAGTATCAACATCTTGCTGCTGATTGTGTTATTGATTTATAACAATATCAGATGCTTGAATAAGCTCGACGATTTGTATTACCCTGTT
>Locus_51626_83
TTAGTGGGTGGATCGAGGGGTGCACTACTCACACCAGAAGCCTACAGCAAATGTAGCATTAAAATGGAATCACCCACCTAGCT
>Locus_51625_138
GGCACATCCCGGGACCGGACCCCAGTTACTCTTTTCCATTCTGACCGTTGGAGGCCTTTCACCTCAATGCCTGGATCCCCAACAGAAGCTGAAGGTCTTTCTCAACCTCACTCAGCCTTTTAGCCTTTTACGTCTGGT
>Locus_51624_108
AGTTATTTAATAGTACTTACTTTTGACCATTCTGGGTCATATAAAAAGTAAAAAGAGCGTGTCCTTGACTTATTGGGGCTGCTGTAGTTTGCACGGCCACTTGACGCT
>Locus_51623_92
AGAGTCAATCGGATTACCACACAATGTTGCTTCATGTGGTTTATGGTGCTACTTTTCACATATTTTTGCTCTCTTCAGAGAGATTTGGTCAT
>Locus_51622_91
TCTTCTTCTTCTTCTTCTCCCGGAACAGGGGCTGTTTACTCGTCGAGGTCAGTGACGTGGCATTTCTCGGAGACGTAGCAACCGTCGAGGA
>Locus_51621_94
TAGCTGAGATCCTAAGGGGCTGCCACCAAAGGTTCGAGCTTTTCGCCTGTTTCGACGTACACCTACAAGGTTTCCCGGCACTCATGGTCACTCG
>Locus_51620_88
CCCTTGTATCCTTGGAGCGAGCATCGATGACCTCTGGCTTCAACAATTGCTGCGTTTCCTGTTGCTGCAACAGACATGGCAGTGGCTG
>Locus_51619_80
AAAGAGTGAGAAGTACAGAATCGGATTTATATCGTCTGCTATTTGGCCAAGCACGCGCTGGGAGGTGACGTCTGGTCCTT
>Locus_51618_164
GACAGTATGACAAATTCGAATTCATGGTTTGTTCTCGTTATTGATCAATGAGTCGTTTCCTCTCTCTCTACACACGTACACATTTAAGGCTGCGGATAGCTCCGTTCATCGCGATGATACCATCTGCGTGTTTGTGAAACTTTTCTTCTGCTGTTGCCTCGAAC
>Locus_51617_89
AAAAGCTATTGCTACGTTCCTATTCCGTAGCGGGTGTTCGGCCAAGAGCAAGTTGCATCACACGATTTTTTCCAAAGAAAAGATCGGAA
>Locus_51616_74
ACAGTGATTGTCATAGCCTCGATGGTGTGTCACTGAAAGTGGTAGGCACTGTGGTGTCACTAACAGTATCGGAG
>Locus_51615_108
TCCGTGATAGAAGTCGGACGTGATCAACCTTGCCGTGGCGTATTTCTTCCTGAAATACTTCCAGTTTATCGCGCACGGCGCTCCTTCACCGCCCAAGCAGCCTTCAAA
>Locus_51614_92
CCCACAAAGCGCCTCGGTTATTTCACAATGCTAGCATTCTGATTGGTCGAAACGTACACGTGACGAACTTTTTCAATATGGCAGATCGGAAG
>Locus_51613_147
AGATATCTATGTGATGTTCTCTTATGTACACCAATGTGGCCGATGACTATCACAAGCTTTCCAAAGTTGATTTATTCGCCTTCAGGCACAATGGTCCCGATGCTAAGCAGCTCATTAGTTCCCCCAGCCTACAGATTTGCGGACGTC
>Locus_51612_97
AAGACTGGGTTGGATGAAGAGCCTCGAAGCTACTGGAGTTAATCCCGAGTCAGAGGAAACAACGCGTGGACGGAGTGACGAAAGTCCTCATGATGTA
>Locus_51611_86
GGCTAAGCGCACGGCACGGGAGTAGAGCGCCAAGTGTGCGTGCCAGTGCCAGTTCGATGCCCTGTCCCAGTACCATGCCCAGTGCC
>Locus_51610_135
AAAAAAAAAAGTTTCAATATCAGCATCCATTTTATTTGCACAGTTTTACACACAACAAACACACATATTACATTTACTCATCAAAATTAATTGCGCGTTAATTGATAACTGCTGTGCGGCGTCGGTCAGATATCT
>Locus_51609_72
CCGCTCTTCACGCGCTTGTATGCCACCCACTACGTGACCATTGTGGGGTATGACACCATCCTGGTGAACCAG
>Locus_51608_84
TGCGTCCAAGTTATCTATGGAACTGCAATCCGCTTAAGGTGATTCCAGGGCGCCGACATTTTATTTTAGTTATTACCCTGTTAT
>Locus_51607_114
CCCATTAGACCGGGTTTGTGAAACGGGTCCCAGTTCTTTATCACCACTGCACTCACCTCTTGGCTCGATGGTCGTCACGTGGTCTTCGGCAAGATTGTCGAGGGCATGGACATC
>Locus_51606_109
TTTTTTCTGTCGTGTTGTTAGCCAAAGGCCAAGGCTTATCAACTCCGCAGCAAATCCCGGGATGAACTCCTCTCCGAACTCGAGAAGCTGAAGCAGGAACTCCAGCAAC
>Locus_51605_100
ACGGGTCCCGACGCAAGACACAGTTAAACCTAGGTTGTCATATCGCAGGTTTGATGGCATGCCCCTGTCCATTACACGGCCCACTTAACTACAATACTGC
>Locus_51604_108
GTGTTAATTTTTGTATGAGTAACGAGGTTCCATTGGACAGTATAAAAAATGTCGATAACGAACACCAATGACAAGCATAGCGATTGGTATCGACAATATCAGAACGAA
>Locus_51603_118
TCCAGCAGTGCAGTGAACTAACCGTCCTAAGAGCAAGGTCAGAGGTGACGAGAATAAACCACGAGCTGAAGACAACAAAAAATCATCATGGACATTGCTTGGGCTGTTGGTCTGTTGG
>Locus_51602_94
TGTCAAAACCTGGGGACAAAGTACATGAGAATTATCCAAACATTATTCCAAAACTTGCCAAGGGCAACCAAACCAGACATCTGTCATGTTTAGC
>Locus_51601_89
TTTTCTTCTTCTCATCGTCGAAGACTGAGAAGAGTTCGCACCAAATGACGCGAACCCCACTGCTCAAGCAGCGACTTGGTCTTGTCCGA
>Locus_51600_83
GATGGTGAGTAAGACTACTCGACCAGGAAAACTCAAAACATAGCAGCTCACAAGAACCTTGCACATCTAAAACATCAGAGAGA
>Locus_51599_105
GAGCAGACGAGGCCCTCGAACTTCTTCCTCGTCCTCAGTAGCTACGTCGGACATTTCTACGTCTTCGTCCTCGGGGCCTCCTTTCACTTCAAAGTCTTCGCTATC
>Locus_51598_93
CAAACTACACAGGAACACGATGCTTGTTTGGCTGGTATTTTACGAGGCAGCCGAGTTGGTAGCCGCTTGCTTAGCTGCGTACATCTGTTTTGC
>Locus_51597_86
TTGTCCCATTAATAATTTGGCTTGCAGCTCAGTGAAAAGATGGACTGTTCTCAAGGCTGGGTAACAGTACATAAGACATGCTCAGA
>Locus_51596_101
GGCCAAACTCGATGACCGGTAAACGCAACAGAACGAGGTCTTTACATTATTGTACAAGGGAGATGAGGAAGAAGAAGTGATTGACGTTCACGCTGACGCTG
>Locus_51595_77
ACCCCGAACTACAAGTGCGCGGTGATGGTCTTGTCGTTGAGGAGTCCTCGCATATCAATTTCGTTGTCGAAGTGGCC
>Locus_51594_83
CCCATTAGTGGTTGGTGTTGCAAGGCCACAAGGAACACAGAAACGGTGTCAAGAAACCAACTGAACACAGACACATTTCTACC
>Locus_51593_109
ACCCTGCTTCTCCTACTTTTTATAGACGTAATGAGAACGTTCGGTAGCACTCTGCCAGACAATGAAAATGACGCTAATAACAGAAAGTTGTACTTCTGCTGCAGAGAAG
>Locus_51592_103
GTTGGCAGTTGCTACTGAGGACCGAAGGTTGTGAAGTTAAGGACGGTTGCAAGGATCAACTCATGTTGTTCGCTTGTGGTTTGTCTTGCTCCCCTGAAGCTAG
>Locus_51591_75
AGTTTAGAGAATAAGGTAAGGTGGGTTTGGTCTTGCTTGCATTCGTCTTGTTCGCACTTATGCTGAACCAAAACA
>Locus_51590_81
GACAAACTAAAGTTGTTGAGTCAACCAACATGGGCACAATGAATGCTAATGATTAGTATAGTAAGTAAGGCGAGATCGGAA
>Locus_51589_104
CGGTATGGTTTACTTCTGACTAGTTCAGCTATGCCGACCGAAGTCTGCGATTCAGTTATGCCAAACGAAGTCTGCAGTTCAGGTATGCCTAACGAAGTCTGAAA
>Locus_51588_77
TGACAGTTTTGAATTGCCTACTTCATGATGTCCTGGCCAAAGATTCGAAGAAATGTGTCACTTGGATATTCCCGACT
>Locus_51587_109
CCTACTACTTTACCTTTCTTTGGAAAAAAATATGACGGATCGGAACGTTTTGCTGGCTCGTACTGTTTTTGGACCTTTTAAAAAAAATGTTGGTATTTTTTCTTTTTTT
>Locus_51586_97
GCAAACAAGGGGGTGATGCATCACTCCTCAGAGGAGACATCGGGAAAAAAATTCTTCAAATAACAGATATTTCTGCTAAAAGAGAATAAAAAAAAAA
>Locus_51585_130
TTGTCCCATTAAATAATAATCATAGTTTTTGTCATCCTGTTGAACTATATTGGTCTCATGACAGATACTGTGCCAATAACCATTAATATTAAAGTGTAATTTAGTAAAAGGGTGGTTGAGTGGCATGCGC
>Locus_51584_76
CACTTACTGGACAAAAACCTGGCAAGTGTTTCGTTGGTATCGACTCTGGCGTAAACCACGCTGGAAATAGGCGCGT
>Locus_51583_159
TCTAGTCAGCACTTCACTACGAACTGTTACGCCAGCAACCCACGTGCTCCATGCCTGTGTCAAGGTTCATCCCTGCTTACCATCAGTACTTTGGCCGACAGTGTCGAGTTGCAGATTATGGCTATACCAAGCTGCAAGAGCTGTTTGAAGCCATACCCC
>Locus_51582_84
GAAGGCTAGAGACTTCATGACTTCAACACTTATGGTTCCTGGAGTACTTCGATGCTTTTGTCTTCCACACTGTTTTGGGATAAT
>Locus_51581_158
TAGTTGAGTTATGTGACCGTCACAATAATCATGATCATGAACTCCTCAACTGAGTGCACTGACAAGATACAGTTTATGTTTGAGAAGGCCACGGACAAGAAGCCCCAAAGTTCTTACTTCATCATACGTGTTGATGTTAGAATCGCCCTGGTTGTGAT
>Locus_51580_99
ACCTAGAGGCATTCCCTTATGTAGTGGATAAACCATGGGGTCACAGTTCATATTGAGTACAGAGATACGCTTGCAAGCATCTCCTCTTGGGTATATGCA
>Locus_51579_100
AAAATCAAATACCGTGCGTTAGAAGACGAAAGGACTAACACGAAACGACAGAAAAACGGAAAGCACACAAGGGAACACTACGTTTATGAAGGGGTCGCAG
>Locus_51578_111
GGGCTGGGGAACATTTTTATATCCTTCCTGGACACTATTTTTGGAATACAAAGTAAAATTCCTAAGAAATCCATAAGCTAAAACAATAATACATCTAGGTTTACAGCAGTG
>Locus_51577_72
GACCGGCAATTGGGTTCCAGCCACATGACCATGGTGAAGTTGCTCAACTCGGGGAACACGTTTTGGTGGAGG
>Locus_51576_84
TTTTTGTTCACAAGTGACGTTGACTGTAATGCTTAGTCAACACCTTAAATTAAAGGCAATATTAAAGTAGAATGTTACTCCAGC
>Locus_51575_109
ATTCAGACATAATCACGTATTGATAGAGTTGATGATCTCTACTGGTACACGAGAACTACAGCATTCTGACATTGTTCTGTTAGTCAACACCCGTCCATCATGACCATGA
>Locus_51574_99
AGTTCGCGTCTGACCTGATACAAGTTGCTCTGCAGAACGCGCGCAAAGACTTCGAGAGAACGAACATGATCAACTGGATTACCAGCGAGGTGAAGAAAT
>Locus_51573_143
GTTGTTCACTGTACTGACGTACAGTCTTTGTCCTATGTAAACATCTGTCTTGTAATTTGTGTTAGAGTAATTGATGTCTGCAGAGAGATTTGTTGTCTGTGGTGTGGGCCTGCAATCAGACTGGGTAGAGCAATAGTTGACTG
>Locus_51572_76
AGCTGAGCCGCCGCAGAGATGCGATGCGTACCGAAATCTGCAACTTCAGCGGTTTCAAGATCTACCCTGGCCATGG
>Locus_51571_253
AGTTGCAGCGACTTAGTCGTGCCCAACGGACAGAAGATCTGCTGCATTTGCTTGGAGAAGAAACCAGTGGACATCCCCATCATCAATTGTGATCACCGACACGAGTTTTGTCACGAATGTATCGTTCAATGGTTCGCGATGAAGAAATTCGACTGTCCCATCTGTCGAAAGGTCTGGCAAGAGAAAGACTGCTCAGAAACGTCGAGCCAGAACGATGGTCACCTCGCTGTTTCGCTTGAATCTCTGAGATCGG
>Locus_51570_111
AAGCCCAGGAAGTCGCATCGTCCCATTTCCCCAATCTTCTTATACAAGGCGAATTTGTTAGGGACATCGGCGTTGTGTGGCGTCTTGCCGTCATCTTTGAAGAGATTATAT
>Locus_51569_83
AGAAGCAGCAGTAACGAAGCTCCTCGCTTTGCGCTTGCCATTGTATTTGATGATGAAGAAGAAAGATTTTGGCTGGTTTTTTT
>Locus_51568_77
AGGAAAAAGAATTTTCACAATTGCTTTTGTAAAGTCATATGAAATACACATCTTTACTGCCTTTTTTTTTGTTGCCA
>Locus_51567_73
GACTTGCAATGCAGTAACAAATTTACATTTCCTCCGAGGGTTTCATAAACTCATGTTACGAAGGCTACACTCA
>Locus_51566_71
GAGCACCTGTCTTACCTTGAAGGCTCAAACTTCTCCGTCCCTCTGATTGTTGGCTCCGTCAAGTCTTTGTG
>Locus_51565_150
AAAGCCTGACGTAAAACCGGTGCTGAATAGTTAACTTCCAATCCCACATTATTGACGACGACCTGCGGTGCGCTTTCGATTTTCTCCGATCCATCGCTGACGTCGTCGGGGCGTTTGAGAACGATCTGTAACGTGGTCTCGAGATCGGAA
>Locus_51564_73
CCCATTACAATTAAAACAACTTGGATGGCAGATAAACCTGAAGCAGGAGCGGCCAGTGCATCGGCTGCCAGCG
>Locus_51563_108
GTGTGTGTGGGTGTGGGCGGCCACACTGCCGGCCCACGGCATCAATTTCATCGATAAAGATGATACAAGGCGCTGCTTTTTTCGCTTGTTCAAACATGTCACGGACAC
>Locus_51562_90
AGGCTAGATTTTTTAGGTTGCACTTTGTATCTTCATTGTTAGTGAGGTTGCTGTCTCTGAGAAATTTCAGAATATTCCAGATCGGAACAG
>Locus_51561_88
AAGGATGAAAATAAAATAGTCCAACGATGAGGTCGACGATATCATAAATACTGTCATCGGTCCAGACGAGGACGCTGTCGACTCAATC
>Locus_51560_89
ACGGTGCACAACTTGTCATATCTTGGACTCTTCGTCCGGATTCGCGTGTTTAAACGCTGCAAAAATTCGGGCAGTAATTTGCACGGCGG
>Locus_51559_112
CTTGAATGCTTATAGGAACATTTTGACGAGGCAAGCTTGGTTGATCAGAGCAGCAGAGCGAGTGACGAGCTCAATGTCGTTACCTTGGATGATGATTTCGTCCTTGCCACCA
>Locus_51558_72
GTTCTTGGTTAAGGGTACGCGTTCCGACGCGCCAACATTCGAGACCGCTTTCCATGTACGATACGAGGCTAT
>Locus_51557_78
TTTTTGAGCTTGTACAGCCGAGAAGGTGACGTCAATCCCAAAGCGTACCCACTGGCGGACGCTAAACTGACCAAGGAC
>Locus_51556_98
AATTTTCTACCGTAACTCCTAGGTCTTGAATCCGGCAGTAAGCTCTCGTCCAACTCGTGGTGCTTTGTCTTCGGTCAAAGCGAATCCTTGACTGTAGT
>Locus_51555_99
GAGAAGTTGAAAAGTTTGAACTCCACAAATACCGTCCTGAATCCAAGACTGAAAAGAAACAACGTCTTCTCGCTGCTGCCAAAGCCAAAGAAGAAGGAA
>Locus_51554_71
GTAGTCCTGAACAGTAGAGTCTCACAAGGTGAGGTTCTACCAGGCATCCACCAGTGAACTCTATGGTCTAG
>Locus_51553_76
CGCCTTTACTTCTTCTTTTCATGGACCCAAAACAGGGAATAGAGAGGAGCGAGAAAACAGTGCGCATCGATGTCGT
>Locus_51552_74
CTTCGGCGGGAGTGTGTCCCTCAGACCAGTGCAGTGAACTACGATAGCATCAGTTCACAGCACCAAAACCTAGC
>Locus_51551_74
CTGTTCAATCAACCCGAAAAAAAAAATGTAAGCGCTGAAGGCGCTCTAAAAAAGGTGGGCGTCGTAGGCGCTGT
>Locus_51550_72
AAAAAAAGCACACACACACCGCTTTTTTCTCTTTATTCATTCTAATTCAAGAACAAAACTTGTCGTTTGTTT
>Locus_51549_78
ACCAACCGCCTCATGTCAGGGGCCCATGCTCTGTTTTGAAAGAATCTATTCACGTCAATGGAAAATGTCTGAAACTCT
>Locus_51548_94
CCTTCTCCGCTTCCAGGTACAGGGAGGACGCGGCTCTGAACGAGGCGTTCGGCGTCATGGTGGAGCCCGAAGACGCCATCAAGCCCATCAGCTG
>Locus_51547_97
CACAGTGAGCTTAAAGATAAACGCAGAGTACGTGGGCACTTCGGTGACAACGCCATTATCATCGGTGACGCACACGGCGCGCGTGGGATCGAGCATT
>Locus_51546_248
ATAACGACGGTGAAGACAACAACAAAGTGAAGTTCGTCACAATCAGAATGTTCAGAGAGAGCGAAACAAGATTTTCAGTGCAGAATTTTTAGTCGCAGACTGCACAAAGGAGCGCCTCAAGACCAAATTCAAGAATCCCAATCAGCTTTTTGATCTAGTCAGCTGCCAGTTTTCATTCCATTACTGCTTTGAGAGTTATCCACAGGCCATGATGATGTTGCGCAATGCCTGTGAGAGCCTCAGACCTG
>Locus_51545_75
AAAAAAAGTCAGTGTTGAAACATGGCAACACCCAGAGCTTCAAATGAGGCTTCTCTCACAGATGGGTCAGATTCA
>Locus_51544_79
CGGTCTCTTGAACCTGCTGTAGTTCTTCAACCGCATCAAGGCCAAGAAGAGCAAGCCAGCTGAGGGCGAGATCTTCGAG
>Locus_51543_81
AGAAGGCTAGAGTGCTGACATTTTGGGTGGAATTTCAAGTACCTACATGACAAAGTGGTTTAAATATTGTGTTTAACTTGC
>Locus_51542_121
GGCTAGATTTCTTGTGCGGTAGACGTAACCTTTCCACTCTCTCTCGCTTTTTCGGTTCTGTGTGAAAGCGATAAGCTCTTCTATCAGCATGGGTGTAACAAAGGTCAGGAGGTCAGAGAAG
>Locus_51541_111
GAGTTGTATTGGTTGCTGGTAGACTTCTCCAAGTGCGCCAAGATTCCCCTCATCCCCGATATCCAAAAGACCTACAAGGACTTGAACGAATCTAAGCCCAATCCTTTGGCT
>Locus_51540_80
CAAACGCTTACCGCATGAAACTGAACTCGGCGCTCAACTCTCGGACGACTGGCACCGCTGTGCCCGTCCGCTCCATGTCC
>Locus_51539_73
TTTATTTATTTTAGTACTTTTATTTAATTTCATACGATAACACAAAAACTCAAACCAATCTTTCGTTATTGAT
>Locus_51538_77
AACAGACGTTAGGACGAGTGAGCCAATCGCACACATCGCTTTGTACGCTTTTTATGTGGTGGCTAGTAGCGCTACTG
>Locus_51537_100
TGCATACGTGTCCGTGTTCGACAAGCACCAGCGAGACCAATCTTAGTTCAAGCACGATCAATACAAGTTGGGTCTAATCCGATTCATTGTATCTGTCCGA
>Locus_51536_110
CAATCAAACCGGGATCGGGCCCATCTTTGAGTCACCAGAATTCCGTGGGCAGGAGGACGAGTCTATTGTAACAAGGACGTACACTTGCCGCGCCAGAGAGGAAATTCCTT
>Locus_51535_84
AGAAGGCTAGAAATTGTCAGTCCATTCAGTTTCAAACATGTTTAATCACTTACAAATTTAACATGACATGTTTTGCTCTGTTGA
>Locus_51534_126
GAAGTATCAAAACAAAGAGCTTATTCATGGCAGACAGCGCTTTCTTCAAGTTCAACTTTTCTGGCAAACCTTGCACGATTGTGGCTTTTTTTCGACCACGAGATAGAAGTCTCAGATGGACGACAT
>Locus_51533_80
TCTAGTACTGGAAGTAGAAGTAGTTGCTCATCATACTCGGCCATGCTTTCCTCGGCAACCAGATCATGACCTTCATCTTC
>Locus_51532_131
TCAGTCACTTCTTAAGATCTGTTGCTGTTCACTCTAGGCTCTAGGTCGCGAAAACCTCAAGAAATTAACCACGGCTTTCCCCTCATGTACGAAGAGCCTCTTGACTTTCCTCATCACAATTAGCGTCTAAA
>Locus_51531_96
AACCTCGGGAACGTCCTTTTGCTCAAACACCCAGTGATATGTTACTAAAGCTGGCTAGAACAACACCATACTACACGAGAAATCGGCCACATATCT
>Locus_51530_114
GCATCGAGTTAGGAAAGCCGACGACGCTGGCGTCGCGAATCAACGCGCGAATACGATCGAGACAACGCGCTTGATTCAACATCTGATGGCGGGGTTCATCCGAGAAGATGATGA
>Locus_51529_71
TTCTCGAACTTTAACTGTCGACTGATTATAATGCAAGGGACATAACCGTTCATACCTTTAGCAGTTTGATT
>Locus_51528_142
GTGTCTGAGTTCAGTTTTGACTGGCTGATAGCTCTAATGCTCCGTCACCCAGAAGTCCAGCTGGATTAATCAGCAACATCCCAGAATTTAGTCCTTCATCTTCATCACCACGCATTCACCGTCCTTTGGTGCTAAGATCGCC
>Locus_51527_180
GCTCGTTAAAAGTGTTACAAGCTGACATGAAAGTTTTCGTTGCTCAACGAGATAGCCTGCCAATGGGAAATATTCAGTTTCATATTGGAAACATGCCTCTGACTGACAATACTCCAATGTCATCACTCTCAAGTGATGCCATCATTGATGTGATTGTTCCACTTCTCGGAGGCAAAGTCC
>Locus_51526_92
ACCAGACTCTCCCCTTCACATAGTTCGAGGAGCACACACCACAGACCTGACACGTGGACCACAGCTTCCATGTGTTACCACCACACACAAAG
>Locus_51525_88
CTATTTTGACGTCCTGGAAGGCTGAAATGAAGCATATAGATCATAGAAAACCAAAGTTCATTTCCTGCGCACATGGTGAATAAAACTT
>Locus_51524_131
TACCGGTTCAGTAGGCGTTTAAAAAATACATTCCACCTCAAGGAATGGAATCAGACACCGCTTGCGCTACAGGCCTACACGCTGCATCAAGACCAGCAGATCATGTGTAATGGTGTCAGTACTTGTGAACA
>Locus_51523_101
GTTTAACCCCTACTTTTTGTACCTTTGACAATAGAATGTCGATCAACACCGGGACATACCAGTGGTTGTATGACCTTTGTCTGGCATGATGGATCGGCTGT
>Locus_51522_164
GTGGGACTGTAATGAAAGGTCGATAGACAGGTTTCCATAACCACACTGGTTATGAGCTGGCTGATAAGGTTATTTCTGTATGGACTTTCCGAGCTGAGACTGAACCCCACTTGTTGAACCTCCTGGTGAGTCTTGGGAGCTCATCTTAAAAGCCTAGGCCTGAC
>Locus_51521_98
TGTTGATAATATTATTCAACGCTTCTGACTATATAGTCTCCAAGCTTCAGTCAGTCAGGTCACAAGTGTTAGCAGTGGAAAAACTGAGGACATTCTTA
>Locus_51520_116
TTCTTTCACGTCGGTCGAAGAGGAAAGATCTTAGTTGTACGACATGTAACCACAACATTTTCACCAGATCCATCCAGTGTAGGGCGTTCACACGAGATGTTGTTTGGCTTCGCATA
>Locus_51519_93
TACCGTTATGGGAGACATACGACTGTTAATCTAAAGCTTATTTTATGGCACATCAAAATTAGAGAAAAGTCTAATAATGTGTTAGGTGCTGCT
>Locus_51518_130
GGTTGGAGTTGAAGGTTATAGGCTCCTCAACACCTGTAAACTTGTTCCCTCCGACTGAAACTGGTTTTTATGACGTGTTTGGCAACACCTGGGAGTGGGTGGAGGACCACTTCAATGGACTCAATGGCTT
>Locus_51517_96
AACCACAGAAAAATTAGAAAGGAGAAACTGAACCTTCTTGCTTCTTTTTGGCAAAAACATTGAAGGAGACACTATCTAATACACAAGATCGGAAGA
>Locus_51516_99
CAGCCTTCTGTACGTCGTTCATGCGATCGACTGTGCGACGCAGGCGCTCGAAAAATACAACATCGAAAAGGATATCGCCGCCTACATCAAGAAAGAGTT
>Locus_51515_181
TCTGGTACAGGGAGACCTCGTTCATCCTCTTGACAAGATCTTCGGGAGCACGTCCCGTGCTGGAATAGCTGGAGACATCACTGGAACTGCTAAAACGATATATGAGTGCAGTCAAGATCAAGACGATGAGAACAAGCAACCCATATTTCTGGATGCTTTATAAAGAACAATATTGTGCGCT
>Locus_51514_160
AGCCATTCCAGCCATACGCGCAGTTCCACATGCTGCGCAACCGCGACCACTGCCCGACCGTGAACGTCGAGCGCCTCTGGTCGCTTGTGTCGGACAAGACCAAGGAGCAGGCCGAGAAGAACACGGACGGCAAGGCCCCAATCATCGATGTGACCAAGGC
>Locus_51513_136
AAATAAAGCGGCCCCTTGGAAAATTTTTGTCGAACAAATACACGCCTAAACCTTCGCCTACTCGTTTCAGATTTGTAATAAGATCAGCAAGTTGCTTCTCAGCTTCCACTTGCTCCTTCAAGAACTCTCCTTCCAA
>Locus_51512_121
GAAGGAGAAGGAGGAGGAGTAACTCTCCCTCCTCCTCCGCCGTAGCGTCCTGGTATTGCTGGAACTCCGAGACGAGATCGTTCATGTTCCTGAGCGCCTCGGTGAACTCCATCTCATCCAT
>Locus_51511_81
AGACGAAATCTAACAAGTCCTGGCTAGTGATGTAAGATCCAACTTGGTCATCCTTCTCTGTTTCAAGGAGTTGGGTGATTT
>Locus_51510_78
CGATAGAGGAGGGACAACAGCTCCTTCTATCTGCTCCCTGTTGTCCTCCTCCTACCCGAGATGACCTCCCCTCTCAAC
>Locus_51509_130
CAGTTAGTTTCACTATATAACATGGGTCTCTAAAATGATTTCATCAATTACAGTTATATATTCATCGTCCCAATTTATTAACGTTCGTAGTCTGTGATATTTATGGTAGTCTGCAGGTAAAGCTTCGGCC
>Locus_51508_96
TACCCAGTGATAGGAGACGTAATTCCCAAGAACCACAACATTGAATACTGGGCGAAGCATAGAGAAACGTCGCATTTGAGGTTCCAGGCCAACCGA
>Locus_51507_120
CAGCACAGCAGGTCCGAGGTGCGCCAGGGACCCCAGACCGATCCACTGGTCATGCCAATCTACCACTCTAGCACCTACGTGGTCAACAAGATGGAAGACATCATGTCCGGTATCGTTGAG
>Locus_51506_89
CCCATTATTAGTGTTATACCCCACCGAGATCAACATCTGGATCTACATCCCTCTGATGATGGTGGGATTTGTTCCGGCTTTGATTGCCA
>Locus_51505_83
GTCCTACAGCGACAGTAACCGATACCAGATGAAAGTTCAGGAGAACTGCCAAAAGCATTCGTTGTTAGGAAACCTGGCGCTAA
>Locus_51504_101
AAATAGTCTCGCAACCTCTATTACCCTATTATGTAAAGTGTTGAACGTCAGTTCTTCAATGTTTCTAACGCAGTAAGCGAATGCACCTACATGGATGTTCT
>Locus_51503_76
AGTAAAAAGTAAGTATTCTTATGGGCCGTCGTCCAGCTCGTTGCTACCGTTATTGTAAGAACAAGCCTTACCCCAA
>Locus_51502_165
CCCTTACTACTACACATTCAGTCAAATACACATTGCAAACCTTCATTTGGCGCTGCCCAACGCAACAGCTGTATCAAAGAAATCTAGCATGTCTCAAATACTTGTATCTTCATTTATGACCAAGCAGCCTTTGCTTAAATACACAAAGACAAAAATTGATCTAAG
>Locus_51501_91
TTTTTATAGGTTCAGTTTCCAATGATGGATAATTTAATGAATAATTAGGTTCTTCAGGCTACACCATGTCCTTTTTTTGACTGGTCAATTG
>Locus_51500_77
ACGAACACAACAAACACAAAGGTGTTTCTGCAGCAACTCCTTTATGATTGCTGAGGAAGAGGGGGAGGGGGCGGTGG
>Locus_51499_108
GAAGGCTAGAATTAGAAACACGGCAATGCAGGAGGACCGGGTCGAGGGACTTCGAGCGGGACCTACGTTTTTGTGGTTTTCGCTTGGTTTTTTGATCGGAAGAGGGGG
>Locus_51498_113
AAACCACGGTACGGGGTTAGTGGTTGGACTTCTTTCGCTTTGAATTCAACACCATCCTTGGTCACGATGCACACACGGTAGCGACTGAATGCACGGCAATCGCGGTAGTACAA
>Locus_51497_121
ACTCTGAGGTTGGTGGATGGGTCAGAATCACATCCACATGAGCCGCACACGCGGGGACAGCGCCACGCTGTACTACCATCAAACATCTACAAGTTTCTATAAGTTGTTTTTCTTATCTTTT
>Locus_51496_77
TTACAATCTCGGTTGTAGAAGTAAGACACACTGTATCAATTGCAATTTTTCTTCCACCGGGTGCCCTGCATCTCGAC
>Locus_51495_118
AGATTTGAGTAACTGTCGTGTCTTTACCACTGGCATTGCAGCCTAGAGACACATTTCTTCATGGCATTGTTGGAAAATGGGTGAAGTGGGCGGGGGTGTTATTTCTTTCAAATATGCA
>Locus_51494_156
CTAGTAAGATACGACAAGATATTTGTTTTCACTGTCTCCTGGAAACATAATTTACCCTGTATACTAATTTACCCCTAGTTTAACTATGCATGATTCCATCTAGCTTTCATGTCTTGTGTGGCTGCTCTTGAAAACCGGAAACAATTTTTTTTTTTG
>Locus_51493_91
GATGATGATATAATGATGATGTGCATGTATTATATGATATATTAATACTATTAGGCCTACTACTACTATATTACTACTACTATATTACTAC
>Locus_51492_105
CCCTTTAGTAAACGAGATCCTGCAGGCTCGCTATTCAATGTTAACGACACCTCTGAGTTTGTTGAGACCATCATCTCTAAATGCATTGACTTTTACACCAAGGTG
>Locus_51491_141
AAGTCTACATTATAATAGGACTGACGTGTTGTTGACTAAACTACAAGAACTGAAGAAAACGAGAACTGTCAAAACGCCACCACCTCCAATGAGAGACGCAAGGTCGACAGCGGTCTCTAATGATGAAGAGGCCATCAGACA
>Locus_51490_127
GAACGGGTCACGTGGACTACTTGAAGCCTGACAAACACACCTGTGCTGAGTCCCCAACTTGTGCATCAGATCACTTCAAGTGTCACAGCGGGGGTGTTCAGTGTAAAACAAAAGTATGAAAAAAAAA
>Locus_51489_215
AGGCTAGAGCTCTTCAGCGTATAAACCTTGCACGTGATGGACTGAAAAGGGAACTTCGAGAAGGAGAAATTGCCTCTCTCATAACAAAGCAGTTTCTCAAAGATTATAAAGGAACATGGCACTGTGTTGTCGGTCGTCATTTTGGCTCATTTTTTACACACGAAGGAGACGATTTCCTTCACTTTCATCTAGGCGAGCACGATGTTGTACTGTTC
>Locus_51488_95
GTCTGAGTAAAACTAGCTTACAAGAATCCACAGATTGGCCCGTTATTACCGTAGAACTCAGCGTCTTCCCAACAAGTGGAAATACAAGATCGGAA
>Locus_51487_72
GAGAAGGCTAGATACCATCATTAATAATACCCATTATTTCTGTTGTATTTTAATAACACCCCAGATGAGTTT
>Locus_51486_216
TAGAAAGTAGAGTGAGGGTAGATGTTGGTTCAGGGTTGCACGAGCAAGTGGCACAGCCCATGTCATCATAAACGTTTCCAAAGGGGCAATACAAATCACAAACAGTTGGACATATGCGCTGATTACACTCCAGGGAACATATCATGCATCCATCTTCATTCTGGGTGTAGTAGCACAGCTCAGCAGGGCCGTCACACGGTGGTGGCTGTGGTGGGC
>Locus_51485_154
GACTGGGAGTGCACAGACAGCTTTCAAAGGTACGCTTGCTGTCTGCACGGCATGGCCACCTTCCCACAATGGCATCGTCTGTACACTGTCCAAGTTGAAGATGCCCTGAAGCGTCAAGGTGCCCTGGTCGGCATCCCCTACTGGGACTGGTCTC
>Locus_51484_83
GCAGGCCCAGCGGGGTGAACTCCTCCCTGTGGTGACTGTACCAGCTGTTCATCACCAGCATCGTCCCCTTGGAGATGACGCTG
>Locus_51483_71
AGAAGGCTAGAACCGCTATAGGATATTATACCATATTATCTTTTTTTAAATACCGACAAATATTCATTGAC
>Locus_51482_92
ACTGAAGTTACGTTCTCAACGAAGTGATCACATGGCCTGGCCAACTTGCCTCAGTTATTTTGGAAGAGGCAGGCTAAATGAAAATGGGCAGA
>Locus_51481_101
AAATGGTGTGTCGGTAGCCCACAGCGCATGAAATAGGCCACATTCTTGGTGCAAACCACGGAGGAGCGAATTCGACTGTCATGTCCGCATCCAACGCCCCT
>Locus_51480_107
GCGAAGCACGTATTTCTTTATTTTCAACGAATCAACTTTCTGCATCAAGCAGCAAGGCTTGTTCTGCAACATGATCCAGTCAATTATCATTTATGCCAGTATTATAT
>Locus_51479_88
TCCATTAAGAAGGTGAAAACGCTAAGCTTGCTGATAGCCAAGTGATTCATGGAAGACATCTGATTGAGTGTCCACATGAAGTCTTGTT
>Locus_51478_139
GGCCCATGGTAAATAATGTTTCTTACTGCAGTGAGCACGGCCATTAGTGCGGGTTCCTTTGGTTTCATTTCCGTTGTAGTCAACACACCAACAGGTAAATTTGTCCTCTTCCTTGCCTTCACACTGCTCACGCATATAA
>Locus_51477_110
GCTGTCGAGCCAAAACAACGGGCAGAGTGCTTCCTCCAAGGCGCACGGGTTAGGGTATGTGACCCCATCCGTCCCGCAAAAGGGTCGAAAGGTTAAAGGGCACGGCCTGT
>Locus_51476_93
TCGGATGACGGCGGTCATGAGTGCAGTCTCAAACTTCGGCTAACTTGTCGAGCATCCAGCCGCCACCGCACAACTATATCAGACAGCAGCCTC
>Locus_51475_124
AATGGGAAACGACATTCTACGGAGACAATCTCGTTCCCGAGCCAAAAGTCTCCGTGAAACGAACCAAATCCTTGTTTGTAATCCGTCCAGTTCCTGGCAAATGAGACATCTCCTTTGACCCGAC
>Locus_51474_91
CCTTAACACCGCTAGTGAGGGTCGCTCCGTGATCAGTATCGCGATTGCCTTCTGCGAATGATGACGCCGGAGCGTACGCACCTGTTCGTCG
>Locus_51473_133
AACATCAGACAAACGGTTCTAATTATGCCGTGGACCCGGCGGGAGCCCTGCCATGATGCCCTGCACCCTGCGGGCGCCCTGCCATGATGTCATGCACCCTTCGGGGCCCTGTCGCTTATCTGCTGTAGTAGCA
>Locus_51472_100
GTCTGTGCATGTGTGGTTTCGCAACCCCAAATCCCCAGGACCAGCGGACCTGATCAGTCGACCCTTCCTGACCGTTGCTTAAGACAAACTGGGCAACCGA
>Locus_51471_229
AGTGACGTCGTCGAAAGACTTCGTCAAGCAGTGAGTCAGCGATGTAAGCCACAACGTTTGGCTCAGACACCAGACCGGTGTGGTTGCAAGCCTCAGTGTTTGAAGGCTTGCAGCTGCAAGGAATGCTCTGATATTCATTGCGGGTCACACTCTTGTTTTGCTGGTAAACGGACTTCTTTGGATTCTTGGTGGAGCACAGCTCAGCAAAAATGACCGGCTCAGCATACTT
>Locus_51470_96
GGCGGTTACGGTTTACCTTGTTGTCCGGGACTAATAGACGTTGTTATGTAACCACCCGTTCCGGGCCCATATGGATCATATGTACCTCCATAGCCA
>Locus_51469_71
AACGAAGAACTCGTCCTATGCAGCATAGGAGTCAACGAACCACTTCATGGCCTCAGCGCGGGTGACACGTT
>Locus_51468_83
ATTACCGTGATATCAATATTGTTGCTCTTTAACTTTAACCAATTTAAAATATCCACTGCTGCAAGATACATACCTACTGCTGC
>Locus_51467_74
AGAAGTTAGCAGAGTAACAGTGCACTATGTACTGCAATATATACTGATAGCCTGTGATAGGCCAGATCGGAAGA
>Locus_51466_103
GGTCGGCCACTGTCTAAGACTCGTGGGACAGTGGTTGATGAGGTCAATCGGAGAGAAGACCGCTTGAAGCGAAGGAGGCGCCAGCGAAACAGGAGAGCACAGC
>Locus_51465_92
TTTCGGGTTGTTATAACCACTAAACCAGAATGTGGAACTGAAGATATTAGATTTTGGTTTGGCGCGGTCCAATGCAGAAGAGATGACAGGTT
>Locus_51464_79
AGCTTTCAGAGCTAGGTTTGGAGAAGAGAAAGATCTTGGGCAACCTCATGTACTACAGAGTCGCTACACAAACCGTCGA
>Locus_51463_85
AAGATGTGGTTATCGTCAGTATCTTGCACAAGATGATCATGAAATGCACATCTGCTTAGGAGGGCTTCTGGAGCGAACAATACCG
>Locus_51462_71
GAGGAGTCACTACCGCGCCAAGGTAGCCTTGGGTGTGACCTTCTTAATGGGCAGAACAGTACCAGTTGCTT
>Locus_51461_118
AAAAAACCAAAAAACGAAAACTTTGAACCTTTCTTCTTTTTCTTATCGACTTTGCCTGATCCTTTGCCGGCAGGTTTAGCCGTAGCAAGAACTTTCGTTGTTGTTGCAAGTGTTGTTG
>Locus_51460_162
TCCGAAAGGGCGACTTAAACCCATGTACTTAAACTACTGTCGTGGTCTTCGTTTTGAAGAAGCACCGGATTACATGTATTTACGACAATTGTTTCGCATTTTGTTTCGAACATTAAATCATCAATATGATTATACATTTGATTGGACTATGCTCAAACAAAA
>Locus_51459_95
GGGGCTTCTTTAGGTTCTATGACTGGAACGACTTCAACTGGCCGCCTCTTCTCCGTATCGCTCACTTCAGCCTGCAAGAGCTCAAAGAACCACAT
>Locus_51458_93
CTTACGTTCCGTTCTTTGTGCGCAAATTCCGTTCTCAGCTTCACCAGTATGAGCTCCATTTCGGGTTGAAGCCACCATACAACATTCTGGCTG
>Locus_51457_79
AAACTGGATAAGGATATGGTTTGTTTGGGGTCAAACTTGTTTTTGTGTTAAAACACAAAAGGCAGATTGGTCAAACAAT
>Locus_51456_71
ACCGGGAGGTCAAATCCGTTAACATAAGTAAACTGTCCACACCCCAGCCTCTGGCCCTCCAGTTTAGGCAA
>Locus_51455_89
TCCCATTATGTCAACACTGATTCGACCGTCTGTGGTACTACTCTACTGCTTGAAGTGCTTGCGTGCGCCATGGCTTTCTCAGTGCTAAC
>Locus_51454_105
GAAGTAGTGCAGTCAACGGACAGATTTTACCACATGACCACAGTGTTGGGCAATGAAATTGCGCCCAAATTATATATCCAATAAATAGTGACATCTGTCTTCTAT
>Locus_51453_115
AAAAAAAAAAAGTTGTTCGACACTTACAACGTCGGATATCACAACGAGCATCACGACTTCCCTCGCATCCCCGGTTCTCGCTTGCCCCAACTCAAGGCCATGGCCCCCGAGTTCT
>Locus_51452_81
GAGAATCGTCTCACTCGAACTGCTGAATATGGTACGCTCATCTGTGTCGCTGATTGGTGACCTCTTAGCAGAGTGAGCTTG
>Locus_51451_127
TTACATTTAGGTTCTTATAATCTAAAATCTAAATTGATTGTTCACGGACACCATTTCTCACTGATTCGGTGACAGCAGAGTTTAAGGACATTAAACTTAAAGATTCTACTAATTAAAAAAAAAAAAA
>Locus_51450_81
AAGGCTAGACAACTGACAACGCACTGTTAGGTTCATCTGCAATTCACTAGTTTTTTTGTTTATAAACAAATAAATGAATGC
>Locus_51449_81
TGTTTTCCTAAACTAGACAAATATTAAGAGCATTGTGTTATTTGCTAAAGGCATTAATGTAAACAGATCAAATCCTTTTGT
>Locus_51448_76
ATATAGGTGCCGAGAGGTTGTTAATGGCCTGGTCATGGTACATCAACGTGTTGTACTATATCCACGGCTCTCCAAC
>Locus_51447_80
TTTGTTATACGAGGTCCGCTTGAGTTCTCACTCAATATGTGGGACACAGCCCCTCTGGGATTCCTTAAGAGTCCTTTAAA
>Locus_51446_76
GCCTCTAGGATCGCTCGCGAACTGCCCCCTTCGCCGTTTTGTACGGAATCATTCCTCTAACAACTCGCATGAATTG
>Locus_51445_161
CTTCCAGAGTTGCGTGTAACGCTTAGTTGGGTGCATAACAACGATGGCGGACTCGTCCTTCTTGATGAACTTTGGTTCAGCTTCGACGGACTTTCCGGTTCTTCTGTCGATCTTGTCAACGAGGGTGGTGAATTTGCAGGAAATGTGGGCAGTGTGGCAAT
>Locus_51444_121
GACGTTCTCCTTCTCGCACTGCGTCGCGATAACTACGTCCCCGCCGTCTCTGCCGTCGACGTCAAGCACATTGAGATCGATGAGGACACCCTCGGCATGCTCAAGGCCATCGGTTTTGGTG
>Locus_51443_116
CACTTGTGCAGTTAAAGAATGTATGCTTCAGACTTTCGATTTCTTGTGATGTGGTGCAATACAATAAGAGTAATTAAGAGATACGTTGCTGCTCATGTTGACAACGCAACACACGA
>Locus_51442_78
TTTTGTTTTAGCTTTGTTTTCAATCAAACCAAACGTTAATAAATAATAACTTTTATAAAATCAAGTAGTCAATTCTAC
>Locus_51441_249
GAGATTTTCAAAATAAACTATGTAATCTATGTAGTGGGAAGCTAGTCCAACATGCTGGATGTCTCGACCTTTTAGTCTATGGCCAGTTAGTCCAAGAAACAGTCCTATGTTGCCAGGCAACCGAGACAGGTAATAGCCAGAACCAACATCAGGGAACAAACCTATTGCACATTCTGGCATGCTAAAAACACTTTTCTCAGTGGATACACAGAAACGTCCTATGACACTCAAGCCAGCAGCACCACCAAA
>Locus_51440_103
ATTCGGGCATTGAGACTCCCTAAATTGCCCCGATTTATTTCCGCAGCCTGTCATGCAGTGCAGTGTATGGAGGCTAGCATTAATAAATGTGTATTTTATTTTT
>Locus_51439_80
AAGGCTAGAGAAGTAAGTCAAGATACTAATTCTCAGGTATGTGCACTACTTTGGTCACCTGAATACAAAGAGATTATTTC
>Locus_51438_112
TGGCGGGGTTACTTGACGGGCATTGTTTCTGGCCCCCCTTCACCAATTAGAAGTGTTACCCCTTCTCAGGGAAGCCGTTCTATGTTGATACCTAGTGCTCCACAGGCCAAAG
>Locus_51437_163
TGAGAAATGTGTGATAGTTGGATGGGGAGGAAGCGAGGAATTCCCACAAGGCTCTCCATATCTGCGAGAAGNNNNNNNNNNCTTTTACTAGGGCCATATCCACAGACGATTGTAATCAGTATGATTGGGGTGTAACAATCAGCAATAAAGAGATTTGTGTATT
>Locus_51436_117
CGTTTTGGTCTTGGTCTAATCTACAGGCAAACTAAGAACAAAATAACGAATTACCCAAACTTCTCGCATCCGTTGTACGGCGCCCTGGATCAAAGACCTCAGTCTGGTAGCATGTAT
>Locus_51435_112
GAATGGTTCTCTAAAGGAATTTCAAATCATTTCAGAAGACGAAACAGGGACAAATTAATCAACCATGTCTGGAATTATTAATGCGTTATTCGGCCATCACAAAGATAAAGAT
>Locus_51434_113
CGCGTCAGGGGGTTTGTTTCAATGTGACCAGTAGCGAGCCCTCGAAAAATGACTCGTGCACCCATTCGCATTCAGTCGTGACGAGGGACATCTTCGCTGCAGTGTGCAAACAG
>Locus_51433_153
AGTCGGGGTAACGCCTGCTACATTTGGACTCAGGCGTCGTCTGGTATGAGGAATCTTCTGCTTCGGTCCAACTTGGGGGGATAGCCAAGAATGACGCTAGATCCAACCAAGATCACTTCAATTTATCTAAACAGATTTACGTCACTATACCCA
>Locus_51432_100
CGGACCAACAAGACGTACCACTTCATGTTGCCGCAGATGAACTCCATCTTGAGGCCCATCCTCTGGATATTCATGGATTATGCACGCTTGCTGGCTGCTC
>Locus_51431_88
AGCGTAAATCATCAGAGGTGCGCGGGAGTAGCCACCGTCGCGCGAGTAGCCACCGTTTCCACCACGGGAGAATCCACCCTCGCGGGAG
>Locus_51430_76
ACAATAAAAAGAAAAGTCATGAATCCAAACAGCAGCCCCTGTCTGGTTACCTTTGACCTCTAGCTTGTACTGTGGG
>Locus_51429_134
AGTTCTAGCTATGTTCATATGCCGTTGTTTTGTTCCGCTCATAGTAACTATTGCAAGCTTGTTCATTATTACATTTTCCTTCGAAACAACACTGATAACACTGGCTGCTCTGCGACTGGCAAAAGGGTCGGTCG
>Locus_51428_306
CTTGTCAATAAACAAACGACCGATCTGTAGATGAATAATAGAGATAACCTCTCGATGGATGTCCAGCTTCTTCTCGGTATCTTTCATCAGCGACGCCAAGCGTTTCAGTTCACCTTCGCAGTAGACGAGTCGCTTCTCGACTGTTTCTTTGCCTTCGCCCAGCTCCTGTTTGACAAGAACGGGACCCACGAGCTTGTAGATGGTGGCATCCGAATCGAGATTTTCAAACTCTTGCTTCACAAATTCGTTTTCGGTCTTGGTGACGAACAACTGTTGCTGTTGAGCGACGAACTTCTTCATTTCGTT
>Locus_51427_87
TTCTCGCTCATGTTCCTGTTGAACAACCTCGAGAAGCGAAAGGCGGAAGCGGCGCGCATCCGCGAAAAGTTTCCGGATCGGATTCCG
>Locus_51426_86
AGAAGGCTAGAGAAAGGATGTGGTGGGGTTGTCGGCGAAAGATTTATCACAATAGTCGCAATAGTATCGTTTTCCCATTGTAGTTT
>Locus_51425_94
GCGGATGGGTGGTTGTTGTCACTCCACCGACTAACGGCAAATGTCTGGAAGATGTGCTCAATGTCCTGTGGGACTGTGTCAAAGTGGCAGGGGT
>Locus_51424_142
CGGCATTGGACCTTGTTACATGACCACAACAGGAAGAAAACAAGCCTCCTTGATCAAGTGGGCACAGTACAGGGCTGATAGTGGTGTCAACTCTGAAGGTTTGAGGACTACTGTGTTTCCACAGGCCAGAGCAGGTCCAAAT
>Locus_51423_155
TAACTAATTTAGATAGGGCCTGGAATCCATGGGTTCAAACCCATTGCCTTTACAAACCAACATTCCAATACTCACATGAAGTGTTGCCGGTTTTATTTTACAATGACTACCAGTGCATGTATATTTACATATTTAAGCTGTTTTTTTTTTTTTAA
>Locus_51422_167
AAAAAAGTTAAATTTATTAAGGAGCATCAGCCATTCCTGAGCTCTGCAGAATTCATTTGTAATTAGAAGGCCTCCCATCTTGCTCAACACTATTTATTTATGCTGAAACAGCACAACATTGTGAAAACAAAATTAATTTAAAAAATCGTAAAATTGATTTTTTTTTT
>Locus_51421_215
CAAATCAAGTCAGAAATTAATTTTTTTCTATACATTTTTACAAGCTATCGTCTGGAACACAGGGCGACGGGACTACATACGAGATTAGTACAGTTTAACCCAGGGTCAGGGCTGGGCTGTATACACTCACGGGGCCCACGCCAGCATGGGGGTACGAACAACCGACACTCTTGTCCGGAAGGGCAGCCGTTGCAGGCGTCGTTGGGGTCGCTGGG
>Locus_51420_74
GAAGATGGACGAGACGTCAGTCCCAATTACGTCGTGCGAGCTCTTCCCGGAGGCCAGTCTGGAGGTCAAGCCCT
>Locus_51419_123
TGTAACGGCACTCTTATCATGTTGGCGACGGCATAGACCTTCGTTTTGTTGGCATTGTACGCCAATCCAAAACCAACTTGAGTGGTGGCGGACCAAACGAGCTGTGTGAAATGGCCTGTTGCT
>Locus_51418_94
AGTGAGGTTGCTAACCGTAGGATTTCAAACTGAAAACCATCCGCATTCGAAACAAACCCGTCCATCTACAGCTCTGGGACACTGCCGGCCAGGA
>Locus_51417_126
CTCTCATTGCTTCAGTTACTTGGCCTCTGTGACGTCATTTAAGCTGCCTTCCGGCACGCCTCTAAGTCGGGCGTATAAATATAGCGTTTCTGTTCCTGTGAGAACATCGTGGAGGGCATCGATTAC
>Locus_51416_111
TTCCTGGGTTGACAGGCAGTCTTCCTCCGTCGAGCTCGCCGTCAACTGTTCTATCGTTACTGACAACATTCACGGTGGCCATGCTACAAGTTCTGGTTCATTTGTAAGAGT
>Locus_51415_76
TAGTACTTCGTTACACATAGTATGTTTTGTCATGTTCACTATTATTGTTTACAAACTGTTTTCCCTCTTGAACCTG
>Locus_51414_92
ACCCTAGGCTTACAGTAGCTTCAGCAAGCCTATAAGACCAACCGAGAAGAGTACATTCAGAGCACGATGCGGGACAACATGCAACTGTTCGT
>Locus_51413_98
GGTGTGTTAGAGGAGAGACTTTCTCTTGCCAAACACTCCATCGTGATCTGTGATGTTTTTTAAGCGAGGCAGGCAGAGTCAGAGAGGAGATTGTGTGG
>Locus_51412_74
GACACTTGGTTGTGGCGTCTCAACGTTGGGAGTATGGCTCACCAACGGACAGCTATCCAGCACAACAACCAGTA
>Locus_51411_94
CGAGGTCCGTCCGGGGTATATTGGATATGGGCTATTTTTAAAATATTGAAACCCACCACAGGTGTGCACACACACGCGCGCGCACACACACACA
>Locus_51410_96
ATATGTGTCGAAACCAGCTCCCACATGGCCGCATTATGGGTCTCTACTTGCCAGATGGAGGCCATCTAAGTCATGGTTTTATGACCAACCAGAAGA
>Locus_51409_125
AAACCTTAAAGATTTTTAGTAGAGGAAGAATATATGAGAAATATTTGCATGTAGAAAAGGCAAAGGGCTTGACATGTTTGGTGCCATCTCCTGTGTAACACATCTAAAAGGCAAAGGGCTTGACA
>Locus_51408_163
GCTCTTGATCGGGTCACATTGGCATTCGCACCATTTTCATCGCGTGCATTGAGAGAGTGGCCCTGGCTAACAAGCTCCTTCACCCGGAGGAGGTCACCTTTCGTGGCTGCCAAAGACAAGGTCTATTTTTCCTTTGCGCCTATTTCCCTGGATTCCATTGTCG
>Locus_51407_82
TCAACATAACTCAGTCCAATGAATCGCGGTCGAGCTGCAGTAACTTTCTCTTGAATGTCTGGAATGATTCACCACATTTCTC
>Locus_51406_104
GCTACTCGACGGACAGAGACCAGTGGAAACATTCTCCGTGTAACTTTCTTTATCACCGGACGCACCTTCAATAACGACACTAACAACATGTGCATCGTTCATTG
>Locus_51405_115
TTCACCGTTGCAGGGGTACCCCTTCAAAAGAAGCAAAGGGGATGTAAGGCCGGCCCAAGTCCCAGACATTGACACAGTGGTCAACCAGAAGAGAGCAGCTGGAGATGTGATGTTT
>Locus_51404_125
CACGGTGGAGGAGGACCTTAGAAGCAGAACCAAGCAACATTCCGAGTGGTGATGCTAACAAAATGTCAACAAGAATTTGAGGCTGATAAAAGTATCATCTTTGAGGACCCAGAGGAGAAAAAAAA
>Locus_51403_113
ACTCCTGCTTGCGCTACGAGAGGACGCTTTGGATGGCTGTGTTGACAAAGAAATCTGTGGCTCAAGAATTAATGTTGAGTGGGCCAAAGGAGGTCGGGATCGTGGCAACGGTG
>Locus_51402_188
CCGGTAAGCACGTTCGGACTGAATCCAGTGTGGAATAGTCATGGGCTTTGCGTGCGTCCTCTATCTGTGCGTGGTGCTCCCCCTGTTTTTAACAATGATGTTCGGTAAATTGTTTATCACGGAAAACTGTCACATGGCGGCCTCATATTACAACTTTGGTCTCATTCTCAAATTCACCGGAAACTGGA
>Locus_51401_95
AAAACCCAGTCGAGGTACACAAATGAGAAGGGAGATAATATCTGCATGCCCCATGTATGCTGCTCTGTGTAACGGAGTTGCTTTACTTGCACTTG
>Locus_51400_89
AGAAGGCTAGAACGCTTCTAAATTAAGTTCCATGAATGAAAACTAGATTTGATCAAATTAGCACTTGAACCTTCTGTTGTAGCCTCAGT
>Locus_51399_104
GTGTGTTGTAGGTGGTACGAAAACGATGACAATCAATTGGTCGATCTCTACGTCCCAAGAAAGTGCTCCCACTCCAACCGTCTCATCACCTCTGGTGACCACAA
>Locus_51398_94
CAGGTAGCAAAGAAACTGGAGTTATCGGCTAACCAGAAGTTCCTCTATAACACACCTCTAAATTTATCAATGAGCTTTAAAAATATTTTTACGA
>Locus_51397_84
GGCCGCAAACGAGGCCAACCCATGCAGTGGTCGTTTTAGGGACATGATTTCTTTAATATCGTGTGGGCAAAGTGGTCGTTGTGG
>Locus_51396_99
CACGGTCGTGACGACGCGCCTTACAGTGGCAGGAAATTCCCAGGAACTAGTGTTGGTCCCCCTGATCCCATTAATGATTATGAGTTCACTGGTTTTGAT
>Locus_51395_139
TAGCGAATCGGCGGCTGACTAGTAGAGCCTCAGAGCTGTCTCGTACCAATCGGCTCTCGTGTTCTCATCATGTGCCGACAGATCCAGTTCTGTGATCCAGATGAGGCGAACAAGTTGGCAGAGCAGGTCCAAGCGATTC
>Locus_51394_89
AGAAAGATTTAAAAGCTGTGGACCAAACAACATCGTCAGCTATCATAGACCATGGTCATGGGTTTAAAGTGAACGAACTGGCTGGAGCT
>Locus_51393_90
TCCTAAACCACTTTTACTGTATGTCGTCATGGCAACCTCTGAGCAGTCCAATGACTCTGAAAATGTAAAATACGCCGACCTGTTCCATCA
>Locus_51392_76
CACGTCGGTCGGTACGGTAACAGCAGGCACTTGGCTGGGGTCGTAGTCTTTAGCTGCGTAGTGAACCCATCGGTGC
>Locus_51391_71
GGTCGGTGGTGTCTTTGTAGTTGCAGGCCTTGACCACCTGTTTGGGTCGCGTGCAGGCTCCAACTGGCTCC
>Locus_51390_77
AACCTTATGTATTTACTGTTTGGAAACTTGATTTTTACAAGTGCACTTCTTGAACTGAGTGCTGTGTTGAAGCTGGG
>Locus_51389_97
TTCCAGTTGACGTGACAAGTTTTGAACCATTACAGTGTGGAGCACTCTGCTATGGCAGCATCATACCAGTCGAACTATGAAGTGGTCAACATCAGCT
>Locus_51388_88
AACGATTGGTCCCGTAGAAGTCCCGTCTCTAGCGATGACATCACCAAGAACCAGGGCGGCGAGCACAACTAAACCCCGCGCCAGTCGC
>Locus_51387_277
CACCGATCGTGTTACGCGTCCCGTCTTTACTTTCACCAACTGATGTCAGGTACCCATTTGAGGCTGGGTGAACTCGGGGATCTTGCCAGTGCCGAGACTCATGTTAAGAATGCTGTTATTATAAACCTGAATCATTACAGTAAGCTCAGGTTAACTTTTCTTTGATTAAACATTCAAGTGGATATAATTGTGAAGTCCTTACAAAATAATGCTGCCTCAAAAGGTGTAAATTAAAACAGTGCTAAACCAAAAATAAAAATTAAGTATTAAGTGTAGA
>Locus_51386_74
AGGAACAGAAACGGCCAATCCAAAAATTCTCTCCTCCTGTTTCTCCCTAGCTGCTCTACGGGTATTTTAGTGAA
>Locus_51385_96
CTCATCGGAGAGTGCTGCTACATTTGCGTAAAAAAGTTGCAATTCAGTCATGGGGGCCGGGGGCACAAAGACGTTTTTTTCATTATATGGGCTATA
>Locus_51384_83
CGTCGTCGAGCAAGGGGTTGCTCGTGAAGAGCTCCTCGGACGAGGCCGAAAAGTGCATCAGGAAGCGCATCACTAAGAACGTA
>Locus_51383_90
CTACCTTACGAGATTACGTGGCATCACAACATGGATGCAAACAAATCGCCAATTTTCTAATTGACCATAAATCTGATATATGTATTAGAG
>Locus_51382_104
ACGAATAGATCACCCTCCTGTGATGCTCTTGTTCGGTATCTACATCTGCTTCTCTAAAATGGATCTGAGCTTCGGAAATGAGGAGCTGCAGGATGAGCAAGCTG
>Locus_51381_140
GGTGTAGCTATTGGTGTAGCGAGCAGTGATCAGTGGACACTTGCCAGACGGAAGGAACATCCTGCACAGAGCAAAACAAGAAGCCGAATCGTACAGAGCAAACTATGGCATCCCAATCCCAGGCCGTGTCCTCGTTGAGC
>Locus_51380_116
TTAGCAAAAATACTGTAGTATTTCTTAGGCACTGATGACGGCAGAATGATCAAAGGGTACAACGGAGGTCAGGGCGCCCTAGCCGAGCCCGTGATCATTGAGGACATCCAAGTGCT
>Locus_51379_89
CCTTAAAGAAGACAAAGGTTCTTGAATGCTCAAAGATGTCTCATCTCTTCCGACGAATTGATTGCTTACTAAAAAAAACCAGCAAAAAA
>Locus_51378_194
AATATGAAACCAATATTAACACCATTAATTATATAACAAAGGTGAACATGAAAATATTATTTACATATAAGTGTGGGTGTAAAATGAAGAATGCAAAGGGCGAGGAGCATTGTTAAGGCAAATTAATTTCTCATAGAGGTTCTCATCTTGCATGGTCAAATTTATTTCACTTGGTACCAGTTTTAGATCGGAAG
>Locus_51377_84
CGGGACAATTCTGGACCTGCTCTTGATAGAAAAGTGGAAATCCCTCTCCCCAACGAAGCTGCTCGCCAAGAAATCTTAAAGATT
>Locus_51376_99
CTCTAGGGAGGGTTTTATTTTTGAATGTCATGGTTAGGTTTTTTGGATTTCAGTTCTTGGGTCAGAAGTTCACATCAAAGATTTGTTCCCAAGATCGGA
>Locus_51375_116
GCCACAACTAACAGAGCGCAGCTTGCTGCTGGAATGCTGGGTCTTTGACTTTGTGATATGTGTTCACAGTAGCATCTTTCACTGTTGTAACAGCACCGACAGCGGTATTCTTGACA
>Locus_51374_98
AACACTAGGCTTAATTAAAATGCTCTTATGACCCATTGCTGGTTGAAGGCGGTGAAACGTGTTGTCTCATAGTAGAGGCGGGGGGTCGGGAGGGGGGG
>Locus_51373_72
GGAATTATTTTTACTATATTGAGTAATTTATTACAAGCATACCTCCACAATTCAATAGTATAATAGTGATTA
>Locus_51372_255
TCGTTCTGCGGCTAGCTGTGGACGTCTTTCGGATACATCAGGATGCTTTCCAACGCGCTGACGAAGCACAACTGGTGGATAAACTCCGGCAGAACGAACAGTTCAATCCTTCCCTTTCCTTCGTGGCGCTCGTGGAGAACAAACCCGTAGGCCATTTGCTGTTCACACCCTTGCAGATCAACTACCCATTGACGGGCAAGTCCATCACCAGTCTGGCATTGGCACCGCTTTCGGTCCTGACCGAGTATCACAAGC
>Locus_51371_142
CCCCCGGCAGCATGTCTAAGCAACTGGTCACATCATGGTGGATCCAGAATACTGGCCAGACCCCCTCAAATTCAACCCAGAACGATTCTCACCAGAGAACAAGGCTGATCGGGACCCCATTGCATTTTTGCCTTTCGGTTAC
>Locus_51370_74
AGAACTGTGTGACAGAGACTTGGACCTGTCTTCAGCATGTGAGCTGGATTTGTATTTCAGTTATTGAAGCTATT
>Locus_51369_84
CCTTCGCCTCGCAAACTAGTACACATTCCCTGATGCCCAAGAACACATAGCAGCCAAACATGAGGAGATGGTGGGAGCATGGAA
>Locus_51368_85
CAAGGCTGGCAAGAAGTAATCACTGTGCGAGTGAACCATTTTAAACGACAGACACACGTAACACACAACGAGGGTGTGAGAGGAG
>Locus_51367_97
AAATACGCTGTTCGTGCTGTGCACCGCCGTTCTCGCGAATCTTCTCCTCCGCGCGCCGGGAGAACAGCTTGGCCTTCACAATGACGGGCTGCTTGGG
>Locus_51366_88
TTTCTTATGTAGGGTTGCGTCCAGGCTGGGGCACTTTGAGGGACGTTTATGACGTGGCGTGGCTCCACGTAGCTTTCGTGATGGCTCT
>Locus_51365_72
TTGCCGTCGACGTGGTGGATCATCATCTCCATCTCCTTCTTTACCACAACTTCAACTGCTGCATGTCTTGTT
>Locus_51364_122
GTTGCTACTGACGCACCTACCCGGTTACCCTAAACCCATCGCTGGAAATTGGATCGGACTGCCAGATAACGTTGATGCTGCCATTTATCGCCCCAATGGCTTCATGTACTTCTTCAAAGGCA
>Locus_51363_84
AAAACACAAACTAATCCAGTAATTAAAAAGTATAGCAGTAGTTGATCATGATGTATGTTGATCATAAGTATTGAGAGATCGGAA
>Locus_51362_81
AACTACAGACAAGACATAAGTCCACTGGGTACATCACTTGTCACATTCATGTGGATGGACAACTGTTGCGTTCCAGCTTTT
>Locus_51361_156
TTGGAGCACCCGCTCTAGTACAAGCGCTTCGAGGCCAAGGGCTTCAAGCTCGTCGCCCTCAAGCTCGTCGCCCCGGGCAAGGAGCACCTTGAGAAGCACTACGCCGACCTCGCCGGCAAGGGCTTCTTCGCTGGCATCATCAACTACATGACCTCG
>Locus_51360_86
CATACTTCTAAGTTAAACCTTCTCTTGGCATTTTTCTGATGATTGATCAATTGTTGAATTGTTTTCTCATCGTATAAGGACGGGAG
>Locus_51359_72
CAAAGGAACCGGAGGTACTACGTAAGATCAGCATTCTTGGTCTTTGCTCTTTAATTAACATGGTGGGTCAAA
>Locus_51358_165
AAGTACCTGCACTTCACGGGGGGATGCTGGAACGTAACTACAGTATTTTCTCATGCTCAAACAGTTGTAATGTGCGGATCATGCTCAACTATTTTGTGCCAGCCCACCGGAGGTCGCGCTTCCCGGCTCGTTGGTTTTGTCTTTAGAAGAAAAACCGAATAAAAT
>Locus_51357_75
GGTTAGTTTATCGGATAAAAAACCATATACATTCACCATGGGTGCTGCTCCAAGTATCAATCCTTGCTGTCCTCC
>Locus_51356_187
GTAGTAACTGCAGACTCTAGAATAAATGAAAATTAACCACCTGCAAGAGTCTTCAATGCACCTCTATCCTGGGTCAGTCTCTCCAGCTCTGGCCAAGTCTCTCGATGTCTGCCTCCACACCTCGGCACAAAATGTATCTTGTTGGGACTCATTTCCTCTTTCCTTGAGGGTTCCATTTCAGGGCTTG
>Locus_51355_157
ATGAGAGTCCCTCGTCGTCGCAACAGTGTCTGCTGTTTCACCTTCATCTTTTTCATTACCTGCTCTTAGAGCCAGCTTATCAATAAAATACAATGCCACAGCACGCTGTCGCACTCGCATTTCTTTTGACTTCCAATCCTCTTGGTAATTGGCACGA
>Locus_51354_80
CGACCACATGGTAGTCCCGTAATCTTCAGATCAAGTGTGCAAAAGGTATGCTCACAATTAACCTTAGGTTTGCAGGCTTT
>Locus_51353_85
GGAAGAACAACACCTTGTCGAGTTACTTGAACCATCTTGTGAGCCATCTTTTCAACAGCAGACCAAGTTTGTTGAGCTGGATTGA
>Locus_51352_123
ACTTCCTTCAACTTGAAACCATTGTTCACCTCATTTTGACGAATTCTGTTCTCAAATTCGGGTCCATTGCGAGCAACAAAACTGGCAGTCTTGTCAACAATGTTCCTAACTTCAGGGGGTGGG
>Locus_51351_105
TTGTCCCATTAGGAAAAGGGTTTTCCAAAGTCCGCAGTAGTTGCGTTCACTTTCCACTCGTCAAGATGGGGTCTCACAAGCCGCGAGGTATCCGCGCAGCGCGCA
>Locus_51350_72
AGATTTAAATGGACTTTGACACAGACTACCTATCTGAGCAAAACGTAACATTCAGAAATAGATCGGAAGAGC
>Locus_51349_113
GCCGTAGGCATACAGGAGTTGTGATGACGGCTCCTCTTCCCCCTTCTCCTGGCTCTTCATTCTTCACTCCTAGCTGTGAGGGTGGCTTTCGCAACTTGAATGCCCTCACGCAC
>Locus_51348_126
TATTGTCCCATTATCACTGAGTAGTGACGCATGGACTACCTGGTGAATAGCAAACCCTTCAGCTATGAAGCTCTCCTCGACTCGCGCGTCTTCCTCAAGAGTGTCGCCGATGCGAAAATATGTCTC
>Locus_51347_83
CGGTCTCACAGGGGTTGAAAGAACTGGACCATGCCCGTGGAGAGCTGTGACCACCTAGACAAACTGCCCAACAGACAGACATG
>Locus_51346_83
GTTGCCCGCCCGGCCGAACGTGGTGTCACTCAGCGGTAGGCATCTTAGCCTCGGCTTCGACCCGGGCAACTGCACCGACCTGG
>Locus_51345_140
GACCGCCCATGGTAAGAACTAAGTGATAAAAGTGGGCATGGCGCTGATGCCCATCTTGGCACTGATGTCCGGAGCGACGTCCACGTCCACCTTGACAAAGTGCACGTTGGTCAGGGCATTGGAGAGGGCCTCGAACTGCG
>Locus_51344_122
ACGTCCCTGTCAAGAGGAGCTCTGTCCCTTTTGTGCAGTCGACTTTCCCATCACACACTTGGGATTCAGGAATGCATGTCGCTTCTCTAGCACATCTGACTGTTTTATTTAAGCAGGTGCAA
>Locus_51343_96
ACCTGGAAGTGGTGTTCAAGAACGATTGATTAACGAACCAACTTCACGTGTCTCACCGGATGTCAAACGAAAGGCACCAGCAGATTCTACGCCGAT
>Locus_51342_165
TAGTCGGTAACGACGACGAGAACGTGCAAGTCTAGCGATCGAAAATTCAAAGAAATACGCTGCTGGTCATAATAAACAACATGAATCAGCCAAGAATACCGCTGTTCTCGATCGTGAAACCGAAGAATTACATCATGAACGTGTGAACAAAGATGTGGCTCGCGC
>Locus_51341_76
CCATTGCGCGGAATGACGGGGTTCCCCTTGTGCCCTGAAGGATACACTGTCGATCCCTCGAACTCCAACGACTGCA
>Locus_51340_81
GGCTGGAGTTCCCGTTCTTCGTCGCTGACGTGATTGCTGCCGGCAAGGTGAAGCTCGCCTCCGCCCCGTCCGCTGGCTTCG
>Locus_51339_86
TCTAATAACGCAGGATGCAAACTGTCCTGGTTGGGGCTGACCTTGACCTTGGTATGGCACCAAAATGGAAAGGGCGTCTTGCCCTT
>Locus_51338_140
CGTCTAAGCTTTACCTATACCTATCTATCTGTGTACCAAAGGAGCCACACGGAAGGCTGGCTTGAACTATGCAGCATCTGCTCTTGGAAAGTGCTTGATGCAGGATAGCAGATACACAACTAACAAGTCTTACAGGCTTT
>Locus_51337_191
GACAACGTTGTAGTACCGAATCCTTCAAGGCTTTCTCGAATGCATACATTACGTTATTCAGCTTTTTGTGTCCGAGGGTGTAGTCTCTTATCTTGAGGTGTTTCTTGGTGGACTCCATCAGCGAAAAGATGTCTGCCAGGGAATCGCTCTCAAAAGGAATCTGGACGTGGACAAAGTCCATCTGGTCATGG
>Locus_51336_71
TTGTTAAGTCTCGGAAATTTTTACAAAAAGCAAAGGTCAGTCACTTTGTCAGACACTGTTGAAGCGCCATA
>Locus_51335_89
CTTCAGTGACAACTCTGCTTGTGAAAAAAGGCCGCGTCCACATCGACCAACCAATCACATCGATGCATAGGATCAACGAGGACACGAAA
>Locus_51334_77
GTGAGTTTGGTCTTTTCGTGTTACAAAGAGTGTGGCCCAAAGTTACTCGACTTTGCGGCGGAAGGAGCAGCCCTCAG
>Locus_51333_96
AAAACCTACACCACTCTTTTTTTGAGAAGGTTGACCCCAAAAAAGTTACCCCCAACTCTCACTTTGTGAATGATCTTGGTTTGGATAGCTTGGACT
>Locus_51332_107
TGAAGAACAAACATACAGTGAGCATCATTGGCATGTTTACGAATGATTTGTGGATTAGGATCGAAATTGATCTTGTAACCATTGGGTCCTTGTTGTTGAGCAAGTTG
>Locus_51331_95
AAAGTAAGTACGGCAAACAAGCCATCGGAGTCATCATTTCAATGATGTTCAAGATTGTTGGAGTGGGGGCTCAGAGCCTTGAACAGAAAAAAAAA
>Locus_51330_140
CGTCTGGCGACCTCAGGAACGCGCTCTGACATCCCTGTATGGCGTTTGGATGAACTGGTAATCCAGAACAAAGCATTCCTCAGGTTCTGGTGATGGAGCTTATCGGTTGCTTACGACATGCCCACGCCAAAATCGACGAG
>Locus_51329_116
GACTACTGGTTGGTCTGCGAAAACACTGCCCAGTGATGGAGCAAAAAGAATTTGATTTGGTCAAGAAAGATGAGAAATGTGGCAAGGAATCGGTGGATGGTCAAGCTGGACTTTGC
>Locus_51328_122
TTACGGATACCAAATGGTCCTATGCTTGGTAAAACCGTACAAAGTGTCAAGAAACAAGCACCAATGTATACCCTTACTGGTAGAAGCAAACGAGGTGGTTTCGATGAAGATTTACAACGAAC
>Locus_51327_107
TATAATAGAGTATCGACATACGACACTAGTGACATTTTTTGAGGTGACCTGGATATTTGACAAGTCAGCCTGCTGCGTACGGCAAGGATGCTGTTGCCGTATTTGGG
>Locus_51326_130
AAACCTCTCCTGTCTGAAGCGAACCAAGCAGTTGATCGGTGTCTATGTGGCAGGATTCATCTATCTCGGGTACATGGTCTCGTACGCGGTGAGAACGAACAAAGGCATCTAAAACCACAAACAATCAATC
>Locus_51325_93
TTGAAGGTAGCAGAGACCCCTTCGTTTGCATTAACTGCTGTCTTCTTAAATTTTAATATGGAAATGTTTATTTAACAATTTTGAAAAAGTTTG
>Locus_51324_136
GGGTGTTCTTGTCTATATTGTGCCTGCTGTGTTGGTACAGTTGCCATCACATTGATTGCTGAAATCTCCAGCACATTCATCCAGGTCAACACAGGTATTATCGATATTCTTATAGCCAGGGGAACAGTCACATTTG
>Locus_51323_83
CGGTAGTTAACTCTGTATAGAACATGGTATGGTATTTATTTCTCCGGGACGGCGTACTCGCCAGAGTCGACCTTGACGATCAC
>Locus_51322_96
AGTAGTAACCAACAGGGTAGATTGGTTGTTGTTGAACCATTGGCATCATGGATGGATGAACCATAGGTTGTTGCATCATTGGTTGCATCATTGGTT
>Locus_51321_122
AGGGGTGTGCAAGTCGAAAATGACTTTGAAAAAAACCCTATTTATTCAAATCTCAACCTCTGGCGCACAGACTCAATAGCTTTCACACTGCCAGTAGAAAAATAAAGATACAAAGAGCGGTT
>Locus_51320_77
TTTTTTTTGTCTTGGGATTTAAGGACATTTCACCAAGAAGTGGTTAAAAAGTGTTTATCAAGAGTTAAATTTGTTAA
>Locus_51319_90
TTAAAAATCAGTGTTTTACTGCAATACAAAAGCAACGTTTTATCTGATTTTGATTGTGGCGTTATGGGTGGCATTCTGCAGTGCAGGCAA
>Locus_51318_102
CACAGTGTCCAAAAATACCGTTAGTTCAGTAAGTAGCAAAGAAAAAGTGCACCATCACACGATTGGCTGCTGCAATGCCTTCAGGCAGGGCCATGGGACTGG
>Locus_51317_102
GTGTTGACTTGACAGATAGTCAACAGTCACCAAAACTCAACTATTCTACTCTTTTTTCTTTAAGTTTCCGTTCTTGACTCCGTTTGTATTGCCGTTCTTGAC
>Locus_51316_74
GCTCAGAAGGTTGTAGGACGTTCATTTTAGATGCAGCGACCATCTTCATGGCCTTGGTGATCTTTTTGATCGAC
>Locus_51315_149
TAGTGTTTGAAGACACAACATTAAATGCTCAAGACAGACTATAAAAATCTTCCAGGACTCGGCGCAACTGCACGAAATTGGCGATACTGAGTTCACATCACATCTCAAGAAATCGTTGGTTACACTTAAATTGTTTTGAAGGAAATGAA
>Locus_51314_72
GTCTTTGTGATTTATTGTAATAAAGACATGAATCTATTCAGATCATTGTAAAACTACAATCAGTAAATACAA
>Locus_51313_110
AAAAAAAAAAGCCTCCTACATGACGCTCTGCAGTCCTCGACCATAGGCTATGGCCAAAGATCGATCAGTGTGGACATTTTCATACCACGCCCAGATTTCACTCAAGAGAA
>Locus_51312_79
AACAACCGGTCCATTTCCCTCATGCTACGCTGGACTACGGGAAGCTTGGTCTTGATATTTCGGTAAGTTTCGGCTACCA
>Locus_51311_137
TTTGCCCCTCTTAGACGAGTTAGTTCATGTGCCGAAGAACAAAGAAAGTGAAGAATCCAAAAGTTCAAGTGAACTAACTTTGGAGCCGGTAGATCAGAGTGAAACATCTGAAAACACCAAAGAACTTAATGAGGCGA
>Locus_51310_109
GAAACGGTTCGAGATAGTGAGTAGTGTATGGGATCAATCTAAAACACATGCCTTTTCACCAGCAGTGTGTCAATCAGGGCAACACTGCGTGTCAGCCTGCATGTCAATC
>Locus_51309_120
ACCCTAGTGCTGTACCTAGGATCTATGGCTCTTGTCCACGGCAACACCTTTGCGCTGGACAAAGCAGGCGAGCGTTACCTCCAGCTGACCAAACAGGAGTGGAGCACGCACGTCAACAGG
>Locus_51308_113
GTGCTGCGAGAATGCTAGAGACAATCTCAAGCAGATTCAAGTACACACAAAGCTTATTAAGAAATATTACATGCCCAGCAAAGTCATCACAGTGCTGTAATTTAGATCGGAAG
>Locus_51307_152
TCTTTCCCTTAGGGGTCGGCAAACCACCCCACAACCAGGGGAAGCCCAAGCCGAAGCCCCAGAGCCATCTCTTGCGCACATCCTTGTCCATGATGAGGACCTCGCTGGCCAAAGCGACCTCCTTCTCGCCGATCTTGACCACGTGCTTCTCG
>Locus_51306_71
CCATTTTTAATAGTTCAATCATGTTGAAAAGGATGACGAAATTGAATCGGCCTTTCAGGAAACAAAGGCTG
>Locus_51305_126
TGGTTCGCGTTGCAATCTCGTGCTAAAGCTATCGTCGGCCTGACTTTGGAGGACATTAAGAAACGCAAGACGGAAGTCAAAAAGTTGACGCCACAAGACTTGGCAGCAGCTGAAGACAAAGCCAAG
>Locus_51304_117
TCTTTCTCTTTTTTTGTTTTCGAAAACTAGAACGAGCGATGAACTCGTCGATCATTTACGATGATTTGGTGGTGACGGTTTTTTGGACTTTTGTAGTGATGAGAAATAATATATCAC
>Locus_51303_84
ACAACCGGTCTTTACTATTGATTATTTGGATGTGAGTATGAAAACAGTCAGCTGCTGCCTACCATCTCGAAAGGTGTTACCCCA
>Locus_51302_91
TAGCAGCTGGCACAACGGCTTCTTCTTCAAGCTCTTCTGCGTTGACGTGATCTGGCCCTGGAGCAGCGTGATCTGGCTCTTGATCGCGTTC
>Locus_51301_143
ACTTTAGAACTCCGTGTGGTCATTCGGTCCGTTCACTTCGGAACCCCAGACAACTGCCTCGCCCAAGCCTTATGGGGAAGCTCCTTTGTTCCCACAAGTCATGTTAATCACACGTGACATTCACCCCCATCCTTCAAAAAAAA
>Locus_51300_71
CTACTTCAAGTAAGAAGGACGAGATGTACAAGTACAGTCCCTTTAGGCACTGTGTCACCTGGTTTATTGAA
>Locus_51299_75
TTTATAGTTTGAAAAGTTTCATACCAATGTTTTGTTTGTCATTGTGATGCTCAAGACTGGATGGTTGTTGTAATA
>Locus_51298_89
AATTCGATGTTCCTCCGTCTCTCCACCAACAGCTCTGATTCTCTGCTCAGCTTTCTCAGAGAAGAAACGAGCCTTGACGATGAGAGGTT
>Locus_51297_72
CAAAACAACAATAAAAAGACTTTGAATTGTTTTAAATTTTAATTTGAGTTTTCTTTTGACACTGTTGGCAGA
>Locus_51296_91
AATATAAAGATTTTTTTTTTCATTATCATATTTTAAAAAAATATTATCTTTTCTTAATGTTTTGCACCCTCTGCGGGTAATTGTAGATGAT
>Locus_51295_219
TTCATCTAATAGTGTCTGTTGCACTGAACACACTCCAGTCTTTGCTAGATGCTATTGAGCAAAAGCGAAACGAAGCTTCATCAAGACCAAGATCAGAGCACATACCCAAGCGTGTGAGCTCTTTTAGGCGTAGCGAGTCACCAAATTCTTATGATGGTTCACGTGATGGCTTAGAAACAAGTGGCAAGTCTGGTAGCTACACCTTCAATAATATCCAGG
>Locus_51294_190
AAGTATGGTAGGGTGGGTAGCCGGCCAGATATGTCAACCACAGCTGTGATCCCAACTGTGGTGTGAAAGATAACACCAAACTGTACAGCCGCCGCACCATTCGCCAGGGTGAAGAGATCACCTTCGACTATGCAATGACTGAGACCACCACTACCATTTCCGTTCGTTGCTTGTGTGGCAGCCAGGTCTG
>Locus_51293_116
TCTTTCTGCGATTTAGGTTTCTGGATGGTGAATTTTCAGAACAGTGACAGACTTGGCTGACGCAGACGAGCAAAATGGCTGCGAGTAAGCACGTCCTGACTGAGATCTTCATAAGG
>Locus_51292_110
TGTTCAATCAGTCTTAGTTGAAGTTAGTCAGATTCAACAAGTTAGTCACAATAAACAAGTTACTCACAATCAACAAGTTAGTCAGAATAAGCAAGTTAGTCAGAATCAAC
>Locus_51291_72
GTGTTGAAGAAGAGGCTGAGATGCCCTTCATATCTTACTTAACTTCAGTCGATCTACTCACCCACTCGTCAG
>Locus_51290_153
TATGTTAGTAAGTTATGTGCCGAGAGAGAATCATGTATCCGAATTTGAAACTTCGAGGAAATCGTGCGTGGGATAATTGGGGTTCGCATGGATTTGCCTTTGGAATTCCATTGATCATTCTCGGAGTGGTAATTCAAGTTTTGGAATATCCAA
>Locus_51289_130
TTTTTATACTAACAGCTCTACGATCCTGCGCCTTTCCGTCAATGGTATGAGGCCCATTATTTGCTACCTCTTGGCAGAAGGAAGGAGAAGCCAGGCGCAAAAGCTGCAGCGGCTACAGCCAAAACAAAAA
>Locus_51288_149
TATTTTTATTTTGTCGTGTGGACCTTCTCAAACTTTACCAATTCTATCCTTCAAAGATCAATAAGTCCGTCATCGCCGCCGTCCTTGTTCGCGCCTTGTCCCAACTCCCCGCTTGTGACTTCACTCAACATCTCTACCTCATCCCTGAG
>Locus_51287_160
AGAGCAACTCCGGCAGCTCTAGGTGTGCGACTTGTTGCCCGCTGCTTGGTCCTCCAACTGCTCTCAACTCGTCTCTGGCCTCTTGCCCCAACTCTTGGCTCAACTCGTCGCCAACTACCCCCCCAACACCCTCTGCGGTCTTGCTACTCTCTGCTAAGCC
>Locus_51286_84
CTAAAAAAACTAACACAACATGTGAAAGATGCTATTCTTCTCCGCCATCGAGTTGAAAGAAAGCAAACGAAGATGCAGAGGGGG
>Locus_51285_88
ATTTGTTTTCTGGTGTACTAGGTATTCCCTTTTCAACCATTGACCAAGACAATGACCTGGATTTGCGCGACGACTTGGCCAAGACAGC
>Locus_51284_120
TCACTGAACAATGTCGACAGTGAATCTGAGATGGCAGACGTAGCACGTTTTTGTAACAGATACCCAAATATTGAGTTGACATACGAAGTATTGGATAAGGAGACAATTCATAGTGGCTCT
>Locus_51283_152
TCATTTTTGTTGTTTAGTGTCAATGGCTTGCGCTTGAGCTTTGCGCAGCACGCCCATCTTCAGTCGGTTGGCTTCTTCGTTCAGATCATCGATCCGCTTGCGCGCTTGTTCGAGAATCATCTCCTGCCGTAAGTTCAGATCTTTCTCGAGCA
>Locus_51282_71
GGCATAAGCGGCAGACCTTACCCTGCAGCTTCTTCTCGAGCTGCTCGTTTGCCGCTTTCAGCTGCACGTTT
>Locus_51281_101
GCTATTGTGTCATCTTCTGTGATGTCTCACGGCCACGGTCCTGACCCCCTCGCTGGTCTTGTTTCAGCAAGACGTAAGGCTATGATGAAGAGAACCTGGGT
>Locus_51280_91
AGAACGAACACGATTTGCTATTGCTAAGCAAGGTGCACGTGTGATTATATGTGATTTACCTAATTCAAAAGGTAAAGAAGTGGTAGAAAAA
>Locus_51279_77
AAGAACAACAAAGACTTGGGTACATTGGGCATGGGGAGATTCCCTTTGAAGCGACGTCGGACACGATTGTCAATACC
>Locus_51278_87
TGTTGTTGTTGTCGCGACCGCCCCGAAAGTAACCAAGCGCGGCAGCATACAGTGTGACACAATGTTGGCTCTTGTCCTCTATTGTTT
>Locus_51277_76
TCCGAAGTGTTTCTATCTTGTCTAAACTTATCCCGTCAATGTTATGTGATCCCAGTGGCGACAGCTGGGGGCTTGT
>Locus_51276_136
CTTTTCGAGACGATGCAACGCCTTGACTACGAAGCTGAGGTTGCTGCTTACAACAATTCCACTCAAAACAACAAAGTTTACGAATTGCCCGACGGACAGACCATTACCGTTGGCAGCCAGAGATTCAGATGCCCTG
>Locus_51275_71
TAGTAAAGGACTTTCAACCACTGACCATTTGCATTTTAATTTTAGTGAACATTATCATCAGACAATGTTTC
>Locus_51274_84
TGGGCTCTCACCAGTATGCCTAAAATGTTGGTGAAGCGATTTTTAGGCCTGTTTGGAGGAAACTCTGCAGCAGAGCATGGCTGG
>Locus_51273_161
CAAACGCGTAGAAGCGATTCACTGAGTTGGTCGCTAAGAGCCGCTTCATCTTTTACTTGAGAACCACCAAGAAGATCAAGGCTTCTCACGGTGAGGTCATTGCTGTTCACAAGATCTCTGAGCGCAACGACCGTCACGTCAAGAACTACGGTATTTGGTTG
>Locus_51272_117
GTAAATAAAAGTTATAGGAGAGCATCCATCACCAGGATTGTATCTTGGAAACAAAAAACACCCGAGACATCACCCGTCTTGTTAAATATTGCCACCTCGTTCCACGTCTGACTTCCT
>Locus_51271_73
TGCAGTGGTTCCAAAGGAGGTACTCCTCTAAAACTGCCCCCTCCACTCTGAGCGCCTCCTACTCCATCTCCAA
>Locus_51270_156
TATTTTTTGTATAGTGTCTTTTAGAGACACTTAAATATCCAGAGTTGCGAAAGCTGGCCAAGAGTGTCGGAATTAAAGCCAACCAAAAGGTCGACAAACTTATACAAGCACTTAAAGACCACTATTGTGAGACAGAGAGTGAGGAAGAAACTTTGA
>Locus_51269_77
AGTGTGTTTGAGGTTGCCAGTATCCACACCAACGATATATTAACACCAACTGTGTATTTACGCAAACGGTCTATTCA
>Locus_51268_114
CGTTGCAGCAACCATCTTCGGAGGTTGGGGAGGAAGTTGGCCAAGGGCAAAAGTCTGCGGGCCTCAGCTCCAACAGGATCACTAGATGGGAGAGTGGCGACTGTAACATTCGGG
>Locus_51267_92
CCTGAACGAGGTCGAAGTCATTATGGGGAAGCACGTCTCTTTACCTTCCATTAACTTTGGATCGGACGGTGAGTGGGTGGGGGTGTGTGGTG
>Locus_51266_180
CGGGTTATATTGTAATCGTGAATAACCAGGTAAGAGTTGCGCTAATAAACTTTTCAACAACAAAAAATATGCAGACGTCAGTCACAACCTGGGTTCAGACTGGCCCCGAATGTGAACATCGCAATGTTCGAGCCGGGGCAGGAGAGATTGACAGGCGACGCGAGAATTTGATTGGTTGCA
>Locus_51265_205
TTTTTTTTGTTGTTTTGTTTGCACAATAAAAAAAGCCCTTACAATCTGCAAACCACCAATGTCGCAAAAACAGATTGTCATCAATGCTCCCAGCCCAGTCCGCTGAAATTCCCACTCACTCCTGCACCACTGTGCACATGTGAGTACATCCATCTCCAGCCCGCCCTCCCTAGCGTGTACAAGGGGGCGCCGCTGCTCCCCGGGC
>Locus_51264_84
AATAACTTGTTCGTTCCCGGGGCGAGCTCAGAAGCATTTGCTGCCCTTCTTCAAGTTGAAGCATCGGCAGCCAACGTTGGGGAT
>Locus_51263_83
CTTCTTCTAACCGGACGTCTTTTCTGATCGTCTGTGCCTGTCTTCGTGCGCTTGTTCGTACGAGAAGAAGATTGGCCTGCAGA
>Locus_51262_80
CGGAAGCGTTCAAAATGGAACATGAAGTATTCCACTTTGGGCATTTTCATAAATGCGAAGATCAAATGCGTTCTCATAAC
>Locus_51261_199
AAAAAAAAGGAGGGTCCCAAGTCTCCACGAGGTGCAGAAGCAGTGCCATTACGCTTGCGCTCAGCGACACCCTCCTTTGACTGTTTGAAATTTGAGGCTGATTGCGGTCGTGTGACCATGCTTCTGCTTGGTGAGCCCTTATTTACTTTCTTGAGCGGGCAGTCACTTTTCTTTCTCTGCATATTGGGAGCTGACTTTT
>Locus_51260_125
GAACTTTAGAAAGGACACAGTACCATTTCTTGTCGAAGTTTCTGAAATTCTGCTAAATGGGCTTTCTGTCCGGGCGAGTGTATGCACTCAACGTAATCGAGATGGAAAGATGCGAAAAAAAAAAA
>Locus_51259_87
AAGCACTTCGCTCAGAGTTTGCTCGTTTATCAAGACCGTTTTTCAAAAATTCAGCAACTCTCTTTTCATAAGGAGCGAGACCAACAA
>Locus_51258_226
AGCTGTGACACTACTCAAGCTTGTCCCCCCACTTTTACATAGGTATCGTTGCTTACGTTGACGCCAAAACACAAAAGCACCCTAGGGCCAGGTATTTGGTTGGCTGTGACGCCAAATTTCTATACGTTCCTATTTATCACTTGCCAGAGTGGCTGATGGATTGGCTGATAGAGACGCAAACAAGGAAACTAATCAAGAAAGCGAAATGAAAATTATTATTTTTTTA
>Locus_51257_79
GGTCGCGACGGACTTGTCAAGAAATATCTCTGGCACATTCGTGGATGGCCGATGAGAGAAGCCCCCCTTGAGCATTCGC
>Locus_51256_85
CTCCCGGGACCGACGAACACCATAACAGAAAGCACCCAAGCTAACACAACTGCAACGCTCGAAACGGCAAGTGGCCGGAGCCAGA
>Locus_51255_104
TCGGTGTGCTTCGACTTGTTACGCAAAAGAAACCCGTCCAAATAATCAGAACAGAACAGACAAACAAAGAACTCTGTCGACTTTTCAGAATGGCACCAATAAAA
>Locus_51254_88
TCAAACGCCTGCTCTTGAAGTCTCTCACCCACTCCATTCCTGGTCTCCTCTCTATGGCCAACAGCGGTAAGAACACCAATGGTTCTCA
>Locus_51253_109
AACCCTTACATGCCCAGCAAGTATCCTCCGGGAATCAAGAACTACCTCAAGTTGGTGCCATCGTGCACGATGTTCTTGTACTTTATGGCCTTCCACCCGGTCATCATCT
>Locus_51252_96
TAGCCATGTAGCTGTTCTCATAACGATGTCGCCAACCAATGGCACACGTACACACTCGAGTGGACACCAAACCGAATCATCGGATTCGTCGATGAG
>Locus_51251_102
ACAAACCGGTAGAATAAGTTCAATCCCATGAGAACGGTCAATGTGGCACGTCTCATTGGAGGCAAGTTGGAAATCAGCGTTTTGAGATCCTTGACCATGGCT
>Locus_51250_142
TTTGGTCGTCAGCAGGGCCCCGTCTGAGGTCTGTAGTTCCTGCTCGTGTACGAGGATGAGCTCAAAATGCCCGAGCTCTGCAGATAGCAAGATTGGCAACGAAGCTAATAATCACTCCGGGAGCTCTGAAGACCGCGGTACT
>Locus_51249_73
GAGACGGCCGTACGGTTGATACCAAGGCAGCCAGTATTTCTGCATACGTCCACCTTGCTCCATGTCCCAGGGA
>Locus_51248_85
GAGATGTGGAAAGGCCCATTTTTTCGTGCTTACAAAGCTCAAATTGCTGCTCAATACAGCGGAGCACAATTGACTATTGCTGGTG
>Locus_51247_101
GACTCGTGGTCCGATTTATGAATGAGTTGGAAAAGAAGGAGGGTAGCAGCACTTCTGAGGCAGAGAAGCACCTGTTGAAGGAGCGTGATGATAGGATTACG
>Locus_51246_80
TCGTAATTGTACTGCTAGTATGACGAAAGTGAGAACTACTACCTCGGACTTTACCTCAATGATCACTTCATGTTGTCGTG
>Locus_51245_186
CTCCGTCGAGATTTTCTTTCTCACACAGTAGTTTTTAAGAACAATGAACTCAGTGGAGATCGCCCGGCCACCAGTGATGTCCTCAACCCTTACAGAGAAGCTGTAGCCCTACAGAGGGCAGCACTTCAGCCTGATGTTGCTACAGCAAGCCCTCGTGTTCAGGAAGGAGGCTTTATAAACAAAGAA
>Locus_51244_76
GATGTTCATTTGTGTTGCCAAGCATGCCCACTGGTTTTGATAGGTTCAACTATTCTTTCGTCATTCGAAACTAACC
>Locus_51243_147
GGACGCAGAACCTGTAGGTTTCCACGGCGAATGAATCCAGAGTGTTTGAAGGAGTGAACATTTCTGAGATTGAATCGTTCTTTGGTGAATACGGTAGGGAAAGGATTACGCTGCTTGATGATGGCTGAGTTGTTCTTCTTTACCAAT
>Locus_51242_159
ATTGAGAAGGGAACTATTCCACCTGCCAACACTGACCATTTTGGGACCCCCATGGGGGTGTGATACAATGATCGTCGGTATATCCTTTAACAATCGTGGATACTTGTCTGATAACTGCTTGCAGACCTCCGTGCATTGACCTAACAACTCGAGTAACTC
>Locus_51241_74
TGGGTTTAGACACTGAGTTGAGCTTGGGCCCGTAAATAATTATAATGCCTTCGAGGTTGGGATGTTCGCCTTGC
>Locus_51240_118
TCTATATTATACTGATGGAGCCCTTTCTGACCGGACATCATGTAGTTGTCACAGATTTAATAGAGATGAATAAATTATAAGACACGCCAGATCTGAATGTTGTCAAATCTGAAAGTTT
>Locus_51239_183
TTAAAATTTTGTACACTGAAGAAACTAATGACGCAACACGTACTTCACGCAGTCTTCTCGTGGCGCAGGTATTTCCTCGAAGAAATTAACTGAGATCTGGGCCTCGTTTGGTGATGTTGAGGGAAGACTTCTTTCCGCACCACCATTCGACAAAATCAAAATACCTTATATTAACTTCGAAAT
>Locus_51238_92
TGTTATTTTTTGTGTTGTGTACCATCGTTCATATGCATTCGTGGACCATAGGTATTGAAGATTCGTGCAATACGAATATCGATTCCTTCCTG
>Locus_51237_112
GGCTTGGTACAGGTTTTCAATGATCTAAACAAGTTTCACTGTCCTAATGTTGAGATTGTCCATGTAGGAGATGACCGTACAGCCACCACTCACAAGTATTGAAACACCCCAA
>Locus_51236_111
AGTAATGTTGTTAGTGTCAATTACGTGATGCTTTACTGGTCATTATGGAAGGTGTACCACGAGATCTGTCTTTTGAGTCGTTAAAACGAGAGCTGCTAACACTAGAGGGTG
>Locus_51235_119
AAACTAAGCGAAAATACAGATAATGATAAAACGTCATCTGGCCTGTTACACCGTGTATATTCTGGATAGGGGTTAAATCTGGCCTGTTACACCGAGTATATTCTGGACAGGGGTCCAAT
>Locus_51234_88
GAGTGCAGGGTGATCATGTGTTTGGGTCAACATGATGGCCAGAGGAGGACAGGTAGTTATATATAAAAATTTGCTTCTACACTTTCCC
>Locus_51233_100
ACTGCAAACCTCTCTGTAGCAATGAATAAGGCGGGAAGTTGACCTGTCTGGTGTAACTGGTGGCGTAGGAGCCATTGGGCAAGTAAAGAAAAATACAAAC
>Locus_51232_73
ACCGGGATTGTTCGTTCCCCAGATAAATAGCTGTCTGACGGTATGTCAAGGTGCCTCTGTCACATATGCACGA
>Locus_51231_148
CGGTTTACAGGGTTTACACCCACACACATTGGATGGTCTTACCATGCCTTAGCTGGTACCTTAGACTCAGCAGCCAGTCATGTGACAACATTTTTTGGTCTGATTTTGGATAAGATTATGCATGAAGATGATGTTAACAACTTAATAG
>Locus_51230_109
TATTTGAGAGGGGTTTTGTTCACATCTGAAACCCAGGTCAAGAAAGCCCAAAGTGTCACCAAGCACGCTCTATCAAAACCCAAAATAACCCACCAACAAAGTGTAGACG
>Locus_51229_136
GTCCTTACCTCAATGGAGGGCATGAACTATTGGCCCATCTTGCGGAGTTGCAGTAACTTTTCTCTCGGTCAACGTGACCTGGACATTCTATATCTAGGTTGTCGTGAAGTCCATATAAATTCATCTCATTGTAAGT
>Locus_51228_114
TAATAAATTTCTTAAGTTGCTGTTTGTTTTCTTTATTATGTCTCTATACAACCAAACCTGACAAACTGCTCCATCATATCACGTGATACTTCTGGTTGGTCATGTAGGCTACGG
>Locus_51227_103
AAGGCTAGACAGTGACTGAATGCCTGACCTCAATTTTTCAACCCGTGTGACTTCAGACTTAACGAAGTCATTTCCTTTCTCCAGGACCTTTCGAAGGGTTTTA
>Locus_51226_100
GAAGGCTAGAGCACTAATAACGTTCGTGAGGTTTTCTTGTGCTTTTCAAATTCTTCTGACGAATCCGATCGAACGCTCCGAAACAACAATAACAATAACA
>Locus_51225_109
CACTTCAACTTGTTGAAAGCTCTTCCTGCTGCACAATTTCTTGGTGATAATGAAATGAGTTTGGCAGAAGTGTGCAAAATATTGTGTGCATGAAATTCGTGAACAGTGG
>Locus_51224_74
CCTATTCTTACCAATAAAATAATTATCCAAAAGACCGTTTTGAGTTTAATACTATTTTACCTGTAGTTTAGTAC
>Locus_51223_101
GAGCCCCATTCCGACGTTGAGCATAACAAGCTCTTGCAGGATATTTCCCAGCCTCAAAGTACGATGCATAAACATCATTGATCTTGCCAAACACAGCCATA
>Locus_51222_78
TATCTAGTCGCTGCCTAGTTTATTGTCCAGTTTGGCTTGCAGATCGACAAATTTGGTGTACTGGGTCATATAGTCACG
>Locus_51221_74
ACTAACAATTTATTGACTACTGATTTAAATGTTACCTTGGTATACGCTATACATACATGGTCTATGCAAAAAAA
>Locus_51220_118
TTTTTTTTTCTGTTCGAAGGCAACATGGCCACTCAGTTTATGACAGAAACTCAGCTGTCCAGTATCGGCGCGTAAGGAGATGGGATTTTCGTATTAATCAGATTTACTTTAACACATA
>Locus_51219_105
CACTCGGTAGTCCCTGACGAGTCTTGAATGGCATGTTCCCTTGAACGAAGTGGTATGTTGTTGCTGCCCTGTTTGGTCAATGCCAAATAAATGGGATTCAAAAAG
>Locus_51218_104
AGGTTTAGCGATAGGAGCCAGCGCAGGTCATCGGTCGAGCGTTCACACGAGCACTGCGTCAGGAGCTCCAACATGCAAAGACAGCCACGCAATCGGGCAAAACA
>Locus_51217_71
CCCGCACTCACAATAACATGCTGTTACCTTGTACAGTGTGGTACGGTACGGCCAGACTTTCGGTGTCACCT
>Locus_51216_106
ACTAGACGTCCGACTGGGTTGGGAATTAATCCACACCAGTCCCCTTCCAGCCCAGTATCACATCTCAGTGTGTGATCTCCCTTGTCTAAGAGGAGTGCAAGGGATG
>Locus_51215_115
GGCCCTTACAGGTAGAGAATAATTCATAGAAATAGAGGTTATGTCTCAAAAAATACATTATTCAGGAAGTCTGATAAGTAACAAAGCCTGGAAGGCCTTGGTGAAGACCCACTCA
>Locus_51214_86
GAAAGAATCACGAAGACACGGGTGTACATCTTCTCAACCTCATCGCGGACCTCGTCAAACCAAGGATGCTCGAGGGCCGCCTTTGC
>Locus_51213_95
GTACNNNNNNNNNNCACATGGGTACCCAGTTCTAATTAGAAGGAACCACTACATGAACGATGTCATGATAAAGGCATGTAAAGAGATCGGAAGAG
>Locus_51212_82
CAGTGATTCACGTGCTTTAGTAGTCCTTCCAAAATCGTAGGGGATAAAATCCTTTCACGTCAGGGCTCATTGAACTCTGTAC
>Locus_51211_72
TAACGTTAGGAGACGAATGACCTGGCCTTCTCAGCTATCAAGGCTCAGGATCTGCCTACACTGATGGTCAAC
>Locus_51210_74
GTTTTTCTTTATCAATTTAAGTTACAATGTATAATCAATGCATAGAACTGAAATGGTAACAATATGTAATATTA
>Locus_51209_135
ATCCTTATTGTCCCATTATCCGTCTATTTCTCTCCTCAGTTATATTCCTGCTCCCTCTCACTCTTTAACCATGCGTCACGTTGCTGCTTATCTCTTGGCCTCTCTCGCTGACGAGAACACCGCCCCCTCCAAGGC
>Locus_51208_77
GGCGGTCGGACAAGGCATACTCCAATCAGGATGAATAAGTACACCAGTAAGTTCAATCACAAGTGTGTAGGGGGGCT
>Locus_51207_147
CCCATGCATCCAACAACCTACACGTAGCCTTGAGGTATATACACACTATTGGGGGATGGTGGAGGGTACCCCTGCTGTACTCCAGTGTAAGCTGTTTGAGGACCTTGAAGCCCAGTGAAAGAATTCTGAGGGCCCACGTTAACAGGC
>Locus_51206_217
AACCGAAACGGAACTGGTAGGAGAGAGTTGGTCACTACGTTGGTGGGGACGTAGCCGGGACAGAGAACGGTAATCTTGACGCCGTTGCGAGATTCTTCGGTACGGAGGCAATCGAAGAAAGAGCTGACGGCAGCCTTGGAAGCGCAATAAGCAGAGGCACCAGGAAGGATCAATCTCTGTACGACGGAAGAGGTGACGACGATGTGTCCCTTGGATT
>Locus_51205_71
ACACTATCTTTCATTTTGGACAGTTTCAACGCTGTGTTTGACACCTTGGCGTGTGATAGAAAGTAAAACCT
>Locus_51204_76
TGTAAGAGGTGTCGTCCTTCCTACGCCACATGGCGTTGGGGTCGTACATCGTTGGATTCTGTTGTTGGGGCATCAT
>Locus_51203_94
CTACAATTCTTTTAGGAGCCAAGTGTTGAACTTGCTGCTGATGATGAATCAATTGAAAAGCTTGTTTCTGAATTGAAGGGAAAGAACCTCGAAG
>Locus_51202_100
TATTTTGAAAATGTCCTTCTACATTGTGACAAATACATATTTGATAAAGGAGGTGATGCAGGCGATGAATTTGCAAACACCATCAGAGCTTGTAGAGCTT
>Locus_51201_103
ACGGTCCTCATCAATAACGAGCAGGATGGATTCCATTTATTGTTGTCCTTGTGATATCTTCAACTTTGCCTAACTGAAGTAAATGCAATGAGAAAGTCAGCAC
>Locus_51200_103
GTAACGGAGAAAAACAAAGGTTATTTCCTCTCTAAGTCTTTGGTATTCTGGATGGTTCAACCTGTAGGTGAGCTTCCAGAGAAGAGGCTGTGTGGGGGGGGTG
>Locus_51199_103
ACTTCCGTATGACCGCTAAGTATGAGCCTTGAAAATATCTAGAAGACGTTGGAAGAGATGAAGCCTTCCATCATTAATTCCAGCAGGAAGAAGTCGTGGCCCG
>Locus_51198_139
TGTTGAATGGTTCTCTCTGACACTGACTGCTAGCCAACGCCGCCATGTCGTACTCGAGCAGCGTACAACGAACTACCTATGTTGTCAATCAACCGACGGCGGGCAATCCGTTCCAACAGCTGAACGGCGAATGGTCCGC
>Locus_51197_176
TTTGATAAGTTCTTGTTTTTACGTAGAACAGTGCTGCGTTTGCCACCTTTTGGCGTCTTTCCAGATCTTTTCAGCTTGCTGTCTTGTTTCTTCAAAAGTTTGTGGACAGTTTGATTCTTATCATTTTCCATCTTTTCTGAGGCTTGCTGACGTCTTCGTTTTGCCTTTTCTTGCCG
>Locus_51196_99
TTGTGCACCCTTCTTTACTGGCAGAAAGTTCGAGAATAGGATCAGTAGTGTGAGAGAAGTTCCGTGGTGTGATGGCGGAACGTGTGTGCCTCAGGACTC
>Locus_51195_94
CAGAGAAATTTTCGTTCCTGATCTCTGACATTTTCTGGAATATTTCAGCCGACAGTGAAAACAATTTTTGTCACGATACACACAGCCGTAACGT
>Locus_51194_124
AAGTAAAGGCCAGTAACAATGGAGGAATCCGGCAGGCAAATAAACAACATTGTGCTGGGCTGGGGGTCGGTTTGGTTTAGAGGACCGATAAATATTTAACCTCTGCCGGAAGCCCAATATATCC
>Locus_51193_78
GAAATTGTTCACTGTAGTCCGTACAATTACGTCATATCTTGAGAGATGCTGCACGCAAACGCGTGTGATAACTTATCT
>Locus_51192_75
TGTCACTGTCACTACTCCTATATCCCATGATTTCTACCGGGCAGGACCGCGGGGCGCTTTAGTAGATAGTCACAC
>Locus_51191_149
GGTCCTAAGTCGATCGGTGTGATGGACTTATGGTAGTGGGGAAGGATAATAAATCATTTGTCATGCGACAGCCATCTTGGTCGTTGAGGAAAGAGCTTGCTCACTGGCATTCAGCTTCTGATATTGTTCATGAGGATATAGATAAACAT
>Locus_51190_73
CTAGTGCGTTGGTTCTTCGGTCAACACGGTCGGTGCATCTCTTTTCTTGTTGGCAGCACCGGTTGTCTGCCAA
>Locus_51189_151
TTCTTGTGCCAATACGTCGAGGTGTCGCCTTATCCTCATGGGTTGTCTTACAATACATGGGTATCAGTGTAATGAAAGCTCGTAAACAATACGGTGTTGATTATCCAACTCTGTATGCTAATGATTCAAATCCTCAAGGAAAAGCATTCAA
>Locus_51188_91
TTGAATGGTTCTCTAGTAATTCTTTCGTCGTATCGTCCAATGGCCTCGTCGCAAATCATTCGTCGTATTGTTAAAACAGCAGCTGCTGGAC
>Locus_51187_100
TTTGACCATGACCACTTGAGGCTTTCGAAGTCAATGGTCCAGTCACTGGTAGCATTGGTGGTGGTGAATTGGTTGCTGAAGGTTTCCAACCAGGTACTTT
>Locus_51186_101
CGTCCACTCAATTTTTGGAAATGACGGAATACACAATATGCTATGAAATTCTAGTTGGCACATTTGGTCTCATGGAAATTTATTGTCCCAACGGAATGAAA
>Locus_51185_102
TTCGCTTTCAACTAATTATTAAACACAAATAGTTATAAATATGCCAGCCGAAGCAACAGCAAAAACTAAGGCTAAGGGATCCAAAAATGTGTCTAAAGTTGT
>Locus_51184_81
CGGGGCGGGAGTCCGACTAAGTGGACATGACCCTGTCCAACATTGAGACTCTGCCAGGCTTCAAACAGGACAGAGTGGCAG
>Locus_51183_133
GATACTGTCTTCTGGCTTGTTCGTATGTGAGGTTCTTTGCCTGTTAAATGATGATGTCACTGGTGAAGTCAGGACCCAGCTTGATCTCGAGAGACTTGATGGCCCCGGGCACCTTTGGCTTACCTCCGGAAAG
>Locus_51182_87
GGAGTAACTTATAACGGTAACTTGTTCTTGCTCCAACAGACTTTGCAATAGTGGCGCAGTATCTCCTGTTGACAGACGTGAGTGCCT
>Locus_51181_113
GGTACAGTCAAACAGGCTATTTGCAAGTGTTGACATTGGTCTTGTGCCTCAACTCTGGTGTTGTTGCATATTATTCAGAAAGTGGTGTCTATTGTGAAGAAGATGTTCCGGTT
>Locus_51180_99
CAGCTAGTCTTTTGTCCTAATCTTAACCAACAGTAGGTGTTTTCGAACGCAATAAACGCATGACGAAATCAACGGCAGTAGCAATCGTAGCGACGAAGA
>Locus_51179_79
TCCGGTTTTGTAAGTTTTAACTGATCCTTGGCGACACGAATGTGGGGAAGTCGAGTCTGTTTCTCCGATACTTGAAGGA
>Locus_51178_114
CTTGAAGTACCCCAACTTCACCTACGTCACACAAAACCATACAAGACTGTTTTAGAGTTAGCAACATTCACACCAACACAAACACCGGGACTCAGGCAGGTAAATGTGGTTTAG
>Locus_51177_200
TAAATAGTGTCAAGACCGAATGAAGAAAAACTCCCTGAAATAAAATGTGTCCTTGGACACGGAATATCAACGTAATCATCGATCCATTGATCCTTGCCTTGTGTGTCACCTGTAAAATCTCGTAGTTTTCCGTTGGCGTGCAGGCAGGTAGAAACAGGAAATAAGGTATTCTGTGGTGAATGGACTATCAATCCGAGGCA
>Locus_51176_124
CTTCTAATAACGCAGGATGCATTATCCATGGTCTGTGCTCATTGCTTTATGACTTAATATCCTTACGTAAGACCTCACTCTCGCTCACGTAATGTCGTATCTTTTTTTTTTTAAGTATAAATTT
>Locus_51175_88
ATTCAGTGAGCAGGGTCCAACTCCTTTGTGTCGTCCTGTAAAATCTGGGCTAAACGAAACATGTCGGTGTGTTGCTGCTACACGCACG
>Locus_51174_92
GACGTTTGGGTTCTTCTCAAACTCAGGAAGCAAGGGATGGATTGGCCTTTGGTGATTGCTCTGCTCATTACTCTGCTCTTGGCAGTTGGAGG
>Locus_51173_104
ATTAGAAAAAGAAACTGTTTGAGATGAGGCAAAATACAGGAAAGATCACAGCTTAAAATGGGAGAATGAGTACTTCCATGAAGTAGGGGAGCACTGGGTCTACC
>Locus_51172_331
AGCTGACCGGTCACAGTTATTAGAATTGCTTGAAGATAACCGATCTGTCTTCACCCGAACTATCACCGAAGCTGAATATCGCGACACACACACTCTTTCACCTACTCCAAAATTGGTATGGACTGAATTCGCGAAGGTCTTGAAAGTGTTCATGAATGGTGACCGGCAAGAACGTGATTCAGATATTGATGATGCCTTCCGTATTCTGGATCAACAAGCGCAAGGTTTATACGGTAGAACATTGAGCTTACCCGATGGTTTCATTTCACCGGATGAATTCCGTGTGTTCCTGGAAATATTATCCTATCAATGGTATATTGATATTTGCATT
>Locus_51171_94
ACATTTCTATAAGTATAATTACTCGATAATGAAGCACGTGAACAAGGTTTAAGTTATCAAGAACGTTTTGATATGGCTAGAAAGAACATGTCGG
>Locus_51170_375
ATTGTCCCATTATCTAGGGGTAGTTAAGAGTAACATTACAATGGAAACATTTGCTCTTATTCTACAGATGTATCTCAAAGTACCAATCCTTAGAGATGTTCAAGTTTGATCGTATACAGGTTAATTCTGCAGCAAATGGTAACAATAAAACAGTAAAACAGTTAATGTTCAAACCTGAAAGAACAAGTGAAATGGAAGTTTTATCTGAATTGAAATCAGCAATTAAAGACGGATGTAGGCAGGAATGGAGTTTTAGAAGTAACTGTTACATTTGGCCTATGACATGGTTTCCCCAAGAACTGCATGATAATTGTACTACAGAGATCCCATTTGGATGCTTCATTGACAAGTCTGGGTTGAAGACTGGCATATGCA
>Locus_51169_114
CTCCGCGTCCATCCCGAAGTGGGTGGTGGATTCGCCGAAAATCTTGGCAGCCTCATCATCCTTGACGGCGGGGGCAACGATCACGTCAGAACCCGGGCGCCAGTTGGCAGGCGT
>Locus_51168_81
TGCCAGACTAGTTAGTCTCCAATTCCCATGTAGTTCACTGTGACTTGAATCGAGCCTCCAGTGACAGCAGTCTTGTAGTTG
>Locus_51167_115
GGTACGCGACGACGGGGAAGAATGCCCTAGATCAAGTACCAAATACACCAGAAAGAATATCTAAAGGATCAACTTTGCTGCAACCAGCGGCAGGTAATCTCTGCATGGGTCCACT
>Locus_51166_105
AGTGCGAAATCAACGTCCGTTCGAGAGAAACGCCCTGAGGGTTACCGCTAGAATGAGCCAAAAGAAAATCGAGAGAAGAACCAAGGTCAAGCCTTTCGTTAAGCT
>Locus_51165_95
ACTGTTATAGAAACCGTTGTTGACTCGGATCGGCCCCAGCTCCTATTTCATCGGTGCCGTGTCTCAGCAAACCAAGAAGCAGTGCGGCTTCAGTG
>Locus_51164_151
TTCAACCTGTCGTAATTAGAGAAATTGGTGACAAGAAGTTACTGCGGGGAGGAGGACCACCTTCTTAATTTCATATTAGCAAAATCACGTTTGAGAACCAGACTTGTGTCGATTCATTTTATGTTCTACTGTAATCCTTAAATCAGGCGAA
>Locus_51163_85
ACAACAAAATGGTCCTCCAGAAGGCCAATGTGAAGTAAAGAGTGTTCACATCATGGATCAGCATGGCACAGACTTAACTGTTGCA
>Locus_51162_88
AACGTGGAAGCTCTCCAACCTCCAACTCAGAAGGAAGTTAGTGCAGAGAACCTAACGCTATTGTGGGGCAGAGATCCCTTATGCACAA
>Locus_51161_194
AGACGACCATGTCGACCAGTACAAGGCTTCGATGTTCATTCTTTAGGTTTAACTGAACAAGAACTTCGAGCAACAGGTTTACATCCATCATTTCATCATAGTGGACAACAATTACCCTTGGATCAATACAAGATCAATTATGATCCTAATCCGATTATTATTCGCAAACAAATGCCCGTGGAAATGCCCACGTA
>Locus_51160_71
GTTAATTCTTGTCCTTTGACCGATGGTACGGAAACGTAGCAAGATCTGGAGGTTCTCGCAAAGACTATAAT
>Locus_51159_81
GGTACGGTTTTCGTCCAAGTCCTGAAGCTGAAACAGCTGTTCGAAGTCAACACGAAGATGAACAGGAACAACAGTTGCTCT
>Locus_51158_78
GACGGTGCTAAGAGTTTTGTCGGCGGTTTGAACACTTAGAGTCCGTAGTGTTTGGTGGCGCAATAATGTTTTGTTTCA
>Locus_51157_167
ATGTTACTAGTGGCATGGAGCCTTCTGAACACTCGTGGCACAATCCGTTATAGTTGCACCTGTTTTCGTGGCAGGTCAAGATGCAGGTCTCCGTACAACCCAGGTAGAAGAGAGGAGGCGCACACTCGCCATATATCTCGACCTCACATATGCTGAGAGAACCGTTG
>Locus_51156_91
ACCTTTTACCTATACGTCTTGGGCCTTTAAAAAATCATTTGAAGCAGCTAATACCCTCCTTTTACATCCTTCTCAAAGGTCTTGTATCTTG
>Locus_51155_128
CAGCGACCATGATTGATAAACGTCAAGGCCAAAGCCAATGATGGAAAACATGTTCATTTGAGAATCTACAAGCCATTGGGTGATGCCAAACCAGAGTTGCACAGTGTTCAACACGACAAATCAGCCGA
>Locus_51154_80
CTTCTCGACTAGCTCAGTGAATTTAATATAAAATGGGAAGGTCTTCAAGATATTCCTCAACAGTTTTTTCACATGTGGAC
>Locus_51153_73
TTTTACAATTAAAAACAGGAGATATGATTTTTATTGTCTTCTTGTTGGCCCGTGTTTAAAGATGATAGCATTA
>Locus_51152_81
ATCACTTGCACGCTAAAGGATGCAGGTGATCGTAGTTTGGTTGGCAGCAGTGGCATGCTCGATTGCCGATCGTCGCTCGCA
>Locus_51151_159
TGGAATTCTGGAAGAGGAAATTGCCCATGAAGGCAGGGATCAAGTTCTCCTGCTTGGATTGTCTGTATTCCCTCGCTTTGCGGCCCAAATTCTCATTCAGAGCCATCGCCTTGTCATACACATCGAGCAGCATGTATGTTCGCCGAGATAGACTTAATT
>Locus_51150_93
CAAGAGGAAAGGTGCGTATCCGGTCACCTCCATAGAAGATGTCGGAACAACTAGCCACCATTCAGACCGAAAAGGCCTTTTTGAGACAAACTG
>Locus_51149_123
AGATCTAGACAAACGCCCCGGATTTTATTCAAAGACCGGTTGTCTTCTCGTTCGTTCGAACAAAACGCGCACAAAACAACGATGGAACAACAAAAAAAGCCAATTTTTTCTTCTTTTTCTTTT
>Locus_51148_184
TGTCGTCTGTTCTTGACATTGAGTGTCGCGTTCTTCATTATAATTTATGTGTCAATTTATATTTCTTCAGGTTAAAAATACTATTGGCTCCTTAAAACTATTATTCCAAAGGGCACCCTAATGGTCAACTCAAATTTCAAAATAAGTTTACTAAAATTCTTTTGTCCTAATTTATATACATGAA
>Locus_51147_84
GTATAGTCGCCGTGGTGTTCAGTTCCGTTGATTAGCAATCCAATACAGACAACAGCGTCATTTAGGGCCAGCACCACCACCAGG
>Locus_51146_87
AGTAGCGGTCCCAGCATCAGATCGTCATCAGCCATTTTCGGGTTCTACACGAAGGAATCAGCTTTCAATCTTGATAATCTGGGTAAA
>Locus_51145_73
CAAAATTGGATGTTGATCCACAGTCACGTGATTTTTAACATCCGTGAAGCTAATAACTCTAAGCCGTGCATTC
>Locus_51144_71
TTTCATCAGTTTGAACGACATGTTGTGGTTTAGTCAGCAATCTTGGGGGATACAGTAAATGTGTTGGCCCG
>Locus_51143_133
GAATACCTAGTCCGGAAGCGTTATATTGAGGCCAATCGTGGTGTCGATACCGAAAAGTCCTATCCTTACTATGCTGTGGATCAAAAATGCAAGTTTAACCCATCAACTGTAGGCGCTACATTGACCAACTTCA
>Locus_51142_76
GTTGTAACTGTTTTAAGAGAAGCTTTGGTCAACACGGGCTAAATTCTCTGGCTTTTGTCAACACGGACAAAATTCT
>Locus_51141_71
AAAAAAAAAAAGTCCAGTCGGTCTCGAGCTTGAAATGACTACTGTTCTTCTAGAAAAAATGAGACATTTCG
>Locus_51140_183
TAGTTAAGATCGCGAATCTTATTCGGTAAAATAAAGAAGGTTTGACCATCAAAATGTAAAAGGAAAACGCTAACCTACATCACCCATCCATCTCATCCGTTCGTCCGTCTTTCTTTCTATCCATCAACGTCTGACTATCTGTTAGTCTTTCGGTCTGTCTGTCTGCCTGCATGTCCGTCTGAC
>Locus_51139_139
TTTTACATAAAAACACCTATGGGGCAGCAAAATTCTCGCCAAGAATACTAGCCACGCCACTGCAGTCGGAGCAAATGTTTCTCACAGTGCTATTAATGAATGCATCGCCATCTTTGTTTGATTAGATAAAATGTTGCTT
>Locus_51138_144
CCTTATTTAGTGGGATACAAGGAACACATCAATTTGAACTATAACAACATCCGCCAGGTGACAGGTTTGGATGGCACCAAACTTACCAGATTACACACGTTAGAACTCAGGAGCAATAAACTGGAGACATTAGAAGGAATAAAT
>Locus_51137_79
TGCGTCCACAGACTTGTTGAAAGACAAGGTCGAAATATACCAAGAATTCAAAGACTGTATCAAGGCTTACTGTAAATCT
>Locus_51136_78
GGACGACCTGTTGTAAGCGTAAACAGAGGCTTAAAAAAGAACGAACTCAAAGCATTGATCCTGCTTGAAGCTCTGCTG
>Locus_51135_76
GACTACCTGTATACTGGTTTACAGAAGTTGAAAATAACATCAATACAAACGACAAAAACGGGGACAGTCAAGTGTC
>Locus_51134_97
CGGTCCATGCGACGTTATCGAATACAGTGTGCAAACAGATTACCAACTAAAACCAACAATGGTAGGCTACCNNNNNNNNNNACATTGGTTTAAGGTT
>Locus_51133_160
CGCTACTGGACGTCCGAACAGCATCGTTTGATTATTTAAGTTATAGAATGCTTTTGAAGAGTGCGTTACTTATGAGAAAAGAGAAATCCACAATTGGCAGACACCAGCACTAACACGCTAGTCGCATCAACAGTTGCGTCCATCGTAAATCGTTTCAAGA
>Locus_51132_146
GAATAAGTTAAGAGAGGTCATGTTATCTCTGTTGGCTTCCCCATATGTATGAACGACGAGCAATGCGGGAAAAATATGGTTTAGATGAAGATGAAACTTGTGGAGATCTTCTAGCGACATTGTGTTGTGGTCCGTGTGCTATTTGT
>Locus_51131_79
TAGAATGTTCGAGTTTAGAAAATATATGAACCAAAAATAATACTAAACCAAAGCCGGCACAACGGATCAGCTTACTATG
>Locus_51130_78
AGGTCGACCATGATCAGTCTACAGAGAATGTTAAAAAACTACTAAACGAAAGTCCTAAAGCTGTGATAAGTGCCCGAC
>Locus_51129_71
TGGAGCATTTAAATTAAACGAATATATACGAAAAAGACAAAAAAAATCCAAAGTTCTCAGATGTACTTAGA
>Locus_51128_78
CCGAAAACCAGAGAAGTCACGGTCAGACTGCCAGCACGTGGTGTAGAGTTCACAGTACTTAACCTCGGCGATGTCATT
>Locus_51127_108
GCAAGTTTCACGGAACCTAATCTCAAGGAAATACCCGTCATTAACTCTGAAACAACAAGAACTTCAATGGGCATCAGCTTTCTACGCTGTCAACATCGACGGGGAGAA
>Locus_51126_76
ATGTGTTCATGTATGAGTTCACAGGGAACTAAGAAAATATTAACCGAAACTGCCTATAGAACCCGACAGGCTTCTG
>Locus_51125_78
GTAGCAGGTCATTTGCAAGTAGATATGTCAATAACACAGAATTAATAAAAAGGTCTTATCCTGTCTTAAACAACGTCG
>Locus_51124_75
GTTCTTGTATCCCCGAGTGTAAACAGCCCAAGACCTTAGACAAAGATACTTTTATGAGAGTTCTCACATCACAGC
>Locus_51123_78
AAGTTGAAACGGCTCACCATAAAGAGCAAAACAATAGAGAACCAAAATAAAGAATCCAAAAGGTTATAGCCGTGGTAC
>Locus_51122_78
AGGTGGTACCCGCTGTGGTTAAACACCACCATAAGAGACAACAAATCCAAACCCATGAGCATCGCCGAGGGCGTCTCC
>Locus_51121_74
GTTGACAGTTTATACAAATTGAAAATCAACAAATATAGAAAGAAAGGAAACGGTGCATGTGGTGGCACTGCTCC
>Locus_51120_76
TTTGTTATAAATTAAGCTTTATAGTGTGGAAATATATAACAAAAGCAAACTCATCAGGGCAGTTGATGGATTTGGT
>Locus_51119_78
AACGTCGTCGACTTGGAGGTAGAAACTCCTGAAATATATTAGCAACAAAAATTGCCAACTTAGCAGCAAACTTGACTT
>Locus_51118_73
AGACTCGTTGTACTTGAGGTAATATAACACGCAAACAAATAACTAATCCAAACAATCTATCCTTGCCAAGAAG
>Locus_51117_79
GCGAGACAGCAGTGTTCTAAAATATAGAGTGGCAAAAGATCACGAAGCCAAACCTACTACTTCTGTTGATTCTGTCTCA
>Locus_51116_79
GGCGTCACAGGCAATTAGGGAACAAAATCGTCGAAAATATCACCAACTGAAACGTAACATGCACAGGTACCTTGTCTTA
>Locus_51115_79
TAGAACCTATATGTTAATCGAAAACAATGGATCAAAAAACGATGAAGACAAATAAATTAATGGCTCTCATGAACCTTGG
>Locus_51114_78
ACAACCTGAGATGTACCAATAAATAGCGAGAAAAGACACAATCAATGTAAACAGACAAACGAGTGTAAACACTTGGAT
>Locus_51113_74
TGAATGACTTCGTCCTTCTAACATACCGAACATATCATTAAGCTAAACGCCTGATTCCTGTCTAGTCAAGTGAA
>Locus_51112_78
TGGGTAAACCGCACTTGAAGAAAACAGCCAATTAAAACAGGACAAAACCAAAGTGCCAACTGGACTCTAACCTCGATG
>Locus_51111_74
TTAACCCAGTTGTGGTTCTCAAATGACCAACAGATGAGCAATATAAACTTCAAAAAGTGCTGTAATTGTGTTGA
>Locus_51110_73
CTAGGTTCCTTTCTTTCGTGCAACATAGCCGTAAAACACAATAGAAAACAAAAGGGACTAATTGGTGAGATCA
>Locus_51109_77
TTAGGTTTTAGTTTTTCTCGTAAAAAATTCACTGAAGAAAGTACCAAGGCAAACCACAGAGACTTGGCTAGAGGCCG
>Locus_51108_98
AATATAAATCTACTTCAAGGAATACAACTGTTGAAGAAATCACAAATCAAAACACATCATAGTCCAGCATTTTAAATCCNNNNNNNNNNCTGAATATT
>Locus_51107_97
AGGATGAAGTCAGATGTGCGAATACACATTTGAAATAGACTATTAAGACAAAGACTTGACGCATTTCGAAACCGGCGTAGTCGATCACGACTTAAGA
>Locus_51106_79
CGCACGCACCAGACTAATAAAATAGACGTGGAGAAGATACAAGTAAGTCAAAAAGATGATCCAGTATCAGACCCACTCG
>Locus_51105_94
AGAAACGACCATTCTTTGAAAAAAAAGGCCGTAAACAGACTAACAACACAAATCAGAAAGAATCAACCATTCATCTTGTNNNNNNNNNNAGAGG
>Locus_51104_72
TAACTCAACACAGTAAGAGTACAGAGTCTGCCAAAATATCACTAAGCAAAACAGACCAGACTTGTGCAGTCT
>Locus_51103_71
AAGTCGTGTCAGCTGTTGATAAACAACGTCCAAAAATAGGAGTAAAACAAATACCTGAACTCTCTCTACGC
>Locus_51102_96
TAGTCTGCCAATGGTGCAGTAATAAAGAATTTGAAGACATGATGAACCTAAATCTCGCATGTTTTGCCATGACCATTGTNNNNNNNNNNNNCTTCA
>Locus_51101_76
TGAACATACAATCGACTATATGTCCTGTTTAACTTGGTCGTTTATTGCCTGACTGTCTTGGTCTTACTGTGAAGGT
>Locus_51100_79
GTGTACAAAAACATTTTTACAACAAAACGGTCCAAGATAGAAATAAGAGAAAAACTGTAACACACGGCATCGTGCTTGC
>Locus_51099_74
TGAAATCGGTGTGACTTCTTATCAGAAAAAAACATGACCAACTTAAACATGTCATCTATCTACATGAGAATCCT
>Locus_51098_72
AATTACGGTACAATAAAATACTTTATCTTGTTTCTTTTTTAGTCAAGTGTTTTGTGTCTGAGTGTTGGGAGA
>Locus_51097_104
GTTTGAAGTTCCCAACCCCCGAGGGGGATACAGTTGTATTAATTGGTGAACAGGCACCACTGGAGGAAGTCACCCACGGTCTTGAACATTCTCCCTTTTATCTC
>Locus_51096_78
AGCTGCATCGACCTCATGATAAATAGGCTGACAATATAGTAGTAATCGAAAGCGTATAGTCTGAAACACAGATCGATT
>Locus_51095_79
CTGGTGGCTCTGGTTGCAGCAAAAAACCTAATCAACAGAATACTAACAGAAAACCGTAACCAAGACCTACATATCCGAG
>Locus_51094_73
TAGCCTCGGGCACGTTACTGAACAGATCAACTTAAAAAAGGAGTAAGAAAAAGTGGTGAGAGCGGAGGAGCTG
>Locus_51093_72
TATATCTGCTATCCTGAGTAAAAATACTACACCAACACATAATAAAAGCAAAGTACGAAGCTTTAGCCAGGC
>Locus_51092_77
TACAGTAGTATATTTTGTTTGACAGGACGTGAATATAGGATCAAAGAAAACCCAATATGGCTCAGAACATCAACGTT
>Locus_51091_78
ACGTTGTTCAAAATTCACCTAGAAATTAATTTAACAGACAAGAAATGTAAACCATGTATACAGTTGTATTGGTAGCCC
>Locus_51090_71
ACCGTAGTGGTGATTGTGGTAGACAACCACGGAAAAAAAAAGCAATGCAAACAATGGAGTCTGCTTCAACC
>Locus_51089_79
AGACGACGTCAATCACACTCTCACACCTTTCTATTATTGGTCTATTTGAGTAGTTTGTTGCGCATCATTTTCAGTGCCG
>Locus_51088_93
AGAAACGACTATTCGTTGTAACAGATGGAAGAAAGCAGTAAGACAAACATATTAAGAAGGAATAAACCCTTCATNNNNNNNNNNGAGGCTGAG
>Locus_51087_79
CCACAGTCGTAACCTCAAGTTCAGATGTTTTCATTAGTCCTTTGTTTCAGGTGTATTTTGCTAATCTATCATTGTGAAC
>Locus_51086_71
AGAGTGTTCAGGTTTTATAAGGATGAAGATAGTAATAACATAAAGATACTATGGATAATTAGGAAAACCGC
>Locus_51085_73
GGTATCGACTCAATTAGTGAAAGAAAATGATTCAAAATATGAACAATCAAAACATTGGAAGATGTTTCAGAAG
>Locus_51084_85
ATGATCGTATTTATCTCAGTATAAACGTAACGAACACATGATGAAAGAAAATGCCCTATCCGTTACGAGCATAGGTCTGGGAGTA
>Locus_51083_79
TGGTACCCGCAGTGTTACTGAACAAACATGGGCAACACACTATCAACCCAAATGGGCAACGCCGTGGGAGTCTCCGTGT
>Locus_51082_79
GACCTCCATGAGTCTTGAAGAAGAGACATTGTGAAGATACAAAGAAAGCAAACGGTAAAGTTTGGAGCAACAGCTATGA
>Locus_51081_74
AGTCGTGAATAGAGATTATAAGACAGTGAAAATAATAGGAATCTAAACCTAAGAGAAATTGGTACTTACCTCAA
>Locus_51080_76
GGCAGAGAGCCTGCTACTTTAGAGCTTGATAATATAGAAGAAATCGAAACGTGTAACAATCGCTCATTCCACGTTG
>Locus_51079_79
CATGAGACGAACGGACACCCTTCTACGTTTCATTTGGTATTATATTTTCAACATATGTTGGTCCTTCTTGTGCCTGTAA
>Locus_51078_96
CAACAGGAGTAGTGCTCCTTCAAATCTTGCAAAAATAGGAGCAACCAAAATGCATGACTGGGTCGTAACAGTCGTCGNNNNNNNNNNTAGGGTGCA
>Locus_51077_79
AAACGCAGTGACTCCTACGATCGGTGTTTTACATTGCTGGTTTCTTAAACTCCTTTATTCGGTATCTGACTCGTGGAAC
>Locus_51076_79
GGAATGTGTGGGTTTGTTCCAAAATACCGTTATAAAACAAGAAAAATCGAAACACAGAACAGGTCATAAAGTAGGGTCA
>Locus_51075_73
CCCTGTCTACCTCCTAGTTCAAAGTGGTGCAATAGAAAAAAAAATCAAAAGCTTGACAACACCTGACCACGGC
>Locus_51074_76
GTCGTGATATTTTTAAATTGACATCATCGCAATACATTAGGAATAGAAACATCAAAGACGTCACGACATCTTGTTT
>Locus_51073_74
ACAAACAACAGTGCGGTTTTAGACTTGACAAAGACACAAACAATACAAACCCAATACCGTCTCTCAGGCGATGA
>Locus_51072_77
TTGTTCTTAAGTCTTTGAAGAAAAGAAGGCCAAAACAAAACAGAAACTCAAACACTTTAATGGCCGTGAGCGGGCTG
>Locus_51071_101
TAAAGGAAAGAAAATTTTTGCAAGAGCATGACTTTGTATGGGTAAACAGGTGGTTGGAGGTTTGAGGATGTGTAGTGCTGTGGTGTTGAGATGTTACTTGT
>Locus_51070_79
GAAGTCATAGTTGTTAGCGGAATATAGGCCAGTAAAACACTATGAAACTAAAGCAGTCAACAGTTGGCAGATGACAGGC
>Locus_51069_76
GTCCGAATGTCTACCGGTTCAAAAGCTCTTAACATACAAAAAAATTAAAGTTTCCATCACAACCTACGTAAGTGAA
>Locus_51068_71
CAGAGGTCTGTCTTATCTTGTCGAAAATATAGAATTAACCGAAACTGTCGAGATCAAAATAGAGGCCGAAT
>Locus_51067_95
ATGTAAGTTTTACTATCGATATACAGTGACATAAGACAGTAGGAAAGTAAAATCTTTATAAGACTGAAAGAGACAAAGNNNNNNNNNNNNNNNNT
>Locus_51066_72
TGTCACATGGTCCGTGGAAGGTTTAAGTTAATGGTGTATTAGAAGGGTATGTTGAGATTTTTTATGAATGGA
>Locus_51065_96
TGGGTTAGGTATAGTCATTGAAAACAACGGCAAAACAAACCAGAAACCAAAACCAATGACGACTCCACAAAATCCACCGNNNNNNNNNNNNAATCC
>Locus_51064_79
CAGATCCGGGAAGAAGTGTGTAGGATGTTTGCATTATTGTTATCTTCATGCCGTCTATTACCTCTTTGCCTTACTCAAG
>Locus_51063_71
TATTTTGTAGAGTCTTACAGAATATAATTCGCCAATATATTATGAATTCAAACATTGAACCTGTGCCAAGA
>Locus_51062_72
AACGTAGTGTGTTATTACCGAACACAGGTGTCAAAGACAAGATAAATCCAAATGAAGTAGAACATGGCACTA
>Locus_51061_78
ACCTTTCCATGCATAGACTTACATACTAGCTCAACACACAAAAAACACAAATTTGATAGTCAAAGTTATGAGGGGCTT
>Locus_51060_73
GTGTCGCACCTGATCTCAATAAACACCAGTTAAACAAACCAACAACGTAAACGTGAAAATGCAAGCGAGTCTC
>Locus_51059_79
CACAGAACAGAAGCTCGTCCAATACAATGACGTAATAAACAAATAAGCTAAAGAGTTGACCCGTGAAGACGTCACCAGT
>Locus_51058_78
AAGTGTCGATGTCTTCGGCTACATATTGTCCAAAGAGAAAAAGAAACTAAACTCCAGATGGTACTTTATACAGGTACC
>Locus_51057_71
ACTCCCTTAGTTATCAGGTTATAAATGTTCCCAAGACAACACGAACAGAAATAAAAAAAAACAATGCATCT
>Locus_51056_78
TTAGATTTGTATGTTTCCACTTGGAACTTTACTTTCGTCTTCTATTGCATCACTGTCTTGGATATTACGTGACACATA
>Locus_51055_82
AGTCCAAACTTGGTACCGGTAGAGAAGCCTCAAATATACAATCAACGCAAAGGGTCAAGTGACCTGTACTTTAGGATTTGCG
>Locus_51054_79
TGGTGGCTCTGGTGTCATCGAATATACTAATCTAACAAATCATCAAAGTAAACCGTATACAAGACCTCAATATCCGAGT
>Locus_51053_78
AGTAGAAACAGCATCACCCTACAAAGTGAATAAACATATAAATAAGAAAAATATTGTAGCTAGTGTTACCTTGATCGT
>Locus_51052_71
GACCGACACGATCGCGCGTCTCGAAAGTTTAAGTTAATATTGTGTTAACACTGTTTATTGTGATTGTTGGC
>Locus_51051_71
CCCATTACGTTGGCAGTAGTCCCCAAAGATAAGTCGTGAATACAATAAAAATACAAAACAACAAGATCACA
>Locus_51050_74
GCTGTGGGAACTTATAAGTAAAAAGATGCTGAAAATATAATATGAAGATAAAACGCTCAACAGGCAAGATCCCG
>Locus_51049_73
AAATCGGTTTGACGTTGTATCAGAAAAAAAACAGCACAAATCGAAACTGTCCACTATCTACCAGAGAATCCTC
>Locus_51048_72
GCATGAGACGAAATCACTGTAGATAGTCGTTGAAGAGATCATAAATCTAAACGAAGTAATTCTCGACATCAC
>Locus_51047_79
TTGTACTACAGCTGTAATGAAATAGAGTTCTTAAATATAGCAACAATTCAAAGTTCTGATGTCAATCTATTTGGTCAGC
>Locus_51046_94
GAGGAGTAGCGTAATGGAAAAAAATAGACCCATAAAAGACGACAAACCCAAATGTTTGATTCTCACTCATCTTCTATGGNNNNNNNNNNNNNNN
>Locus_51045_72
TAGATACATTCCAGTTGTACAAAAGACGAGCTCAATACAGTATAAATCTAAATAACATACTCTCGTCTACAT
>Locus_51044_76
CTGGCAAAGTCTTGAGATTGAAAAATCAGTAAAACATGAACAAGGCAAATCTCGTAGCTGTTCTCATCGCCTGTGC
>Locus_51043_79
TAATCAGCTAATGATGGTCTAATATAACCGTAAAAGAGATGACAAAGTCAAACAACAAAAGTACGTTAAGGTCACTGAC
>Locus_51042_78
GTCGGCGGTAGTTTTCTGCTATATATTTCATCAACACAACACTAAACTAAAGAGACTAGTAATCCTCATGACTACCGT
>Locus_51041_78
AGACCAGAGTTTCTCGACATAGACATAAGCTCAATAAAAGATTAACTTAAAGCCACTAATGGATCGTATACTTCCTTT
>Locus_51040_95
CAGAAGGTTTATGGATTGTAAAAGACCAAAAACACGATCAATCTAAACAACTAAAAGGTCCAGATCAGCCTTGTNNNNNNNNNNGTCACCCAGGA
>Locus_51039_78
TGCGTCGTAAATCGTCACCTTCAGTCATTTCCCTTGGTACTATTTTTGGACTCTATGTTGGTGATGTGAACGACCAGA
>Locus_51038_84
TTTGTTTTCGCGTTAGCTGCCAACTAACGTTTCTTTATCGAAATATCTTATGACAAAACAAAGCAACCGGGTTGTTCATTTCTG
>Locus_51037_76
GTTATCGGAACTCAACTTTTAAAAACATGTAAAACATCAACAACATAAAGTTTTTAGTCTCAGCCATGACCTTAGT
>Locus_51036_79
GCCGTTACCCTAGTTCTACTAAGACAACAAAGAAAAACAGCACGAATGTAAATGGAACAGGTTCTTGGATGAATACCGG
>Locus_51035_79
AAGAGTAAACGGAGTGCCGGAAAACACTGTGCCAACATAACAGGAATGCAAATGAACTAGCCCTCTTCAACCATTTCGA
>Locus_51034_79
GACAGCATCAGTTCTTGCAGAAGATAGATGTCGAAGATATAATCAAGCTAAAGAAACAAAGCGTGAATAATACGTTGCC
>Locus_51033_71
AAGAAGTGGTTGGATTGAGATTTCATTTACTCCTGTTTTTTCGTGATCTCTTGTATCTGTCCTCCCGTCAC
>Locus_51032_71
TGGTCGAACTGGTGTTGCTGAACAAAAACTTCTAAGACATGATGAACGGAAATGGCAAAGGGATGGTCAGC
>Locus_51031_80
CGAAGAACAGTGGAGTGTTGCAAAAGAGTTTGCAAAGATAGGAGGAAAATAAAATCCTGAATTTGCACTATGTGCATTCC
>Locus_51030_72
ATTACGAACACCAAGTTTTGTTTCGGTTAATGGTTTATTTTGTACCTATTTTAGCAGTCCTGATTATTAGGG
>Locus_51029_71
CAGCAGCAGTCGTCTACCCTAAAAAATCCACAGAACAGATAAGGAATTAAAAGTTTACACGTCGCTGCACA
>Locus_51028_72
TCAAATCTGTGGTTTTTATATTCGACAAGAAATGAGAAAAGTAAACGCCCCAGGCCTGTAAACAGCAATCGT
>Locus_51027_72
GACCACCAGTAACGTGTACTAATAGAGCCAATTAAGATAGTACTAATCCAAACTGCACAGTGTCGTAAAATG
>Locus_51026_79
TTAGTCGATTGGTTTTGTGGAACAAAGTACAAGAATATAATATGAAGACAAACCATCTATGCCAGCACACACGCGCTGG
>Locus_51025_78
AGTGCCTGTATTCTACAACTAGACACGGTAAAAATACAAAATGAAGGCAAAGTAAACATCCTAACTGACCAGATGACC
>Locus_51024_73
TAGGTAAACTGGATTTAAGTAATACATCAGCACAACAAACAAATAAACCAAACGCCCGAATGATGAGGATGGT
>Locus_51023_79
TCAGTTTCCTCAGATTTCGAAACACATCAAACTAATAAAAGATTAATCGAAACGAAGGATGGTACTGCAGGTCATGGCC
>Locus_51022_71
AGACGAAACACAATCTACGTACATACTTCTGGAAGAGACCACTAAGCGAAAGCAAACAGTCACGACGAACA
>Locus_51021_101
TTATGTTGTAATGGTTGACGCAAAATAGGAGAACAAAAAAGTAAGAAACGAAACCGTCAACATGCCCAAATCCCGCGTTGNNNNNNNNNNTGACGCTGCTG
>Locus_51020_79
ACTACAGAACAAACTACAGTAACAAATAGGTCTAAAAAATGACCAAGACAAAACCTATACAATCCCGTATCTCGGGCGA
>Locus_51019_78
CATTGGAAGGCAGTGTAGTTAGAAAGCTGAACAATATATCAGGAAGCAAAACTCGTTAGCCTCCCGGAACTGGCCATG
>Locus_51018_79
TTGGTTTTTCGAACTCGAGCAATATAGGCTCAAAATACAGAAGAAAGCCAAAACCATGAACAAAGCCAACCTTCTGGTT
>Locus_51017_75
CCGGTGACCACCGGTGTACCAAGACACGAGAAAAAAACAAAAGTAAGCGAAAGGTCGTACACCAGCCCAAACCAA
>Locus_51016_78
TGTATCAACTATAATTCCCATATGGTGTTTTTCTTAATGGTATGTTACACAAGTTTTTTCACGGTAAGACTGGTCGTG
>Locus_51015_77
AGTTGTTGTTTTTAAGACTTTACAACTTTCAAAAAGAACAGCAAGTTAAACATTCTAATTTGCCTCACGGCCTTAGC
>Locus_51014_75
TGAGATGGGACCTCTTTCGGAAGAAACTGTCTGAAGAGACTATGAAACTAAACCCCGGAGGGCGGGAAATGATTC
>Locus_51013_79
CGCCTCATCAACTAGGCCGATCCCTGGTTTAGGTTAATGATTTCTTAGGTCAGTTTGTTGATACTATCACAAACGAAAT
>Locus_51012_78
AGGTTGTACCCAGTGTACGTAAATACTGGTAAAAGAAAATACCAAAGTAAACTACCAAACAGAAGAAATGTACCTGTT
>Locus_51011_76
TTTAGAAACCATAAAAATTAAAATGTCTCCAAGATAGCAGTAACGTAAACAGGACAACTCATCAGACTTCAACAAC
>Locus_51010_87
CAGATGTCAACTCATCGCCCAACAGAAACCAGAAAAATAAGATAAAGCTAAACGCATTAGTTCACGTAAATGGCCACCGCCGAAAAG
>Locus_51009_71
CACAGTGCCAGGTCTATCAAAACATAGAAGTAGAACATAGCACTAAAGCAAACGCAGTAGTCAGGGACACA
>Locus_51008_79
TCCAGATGTCAACTTAACGCAATACAGAAACCAAAAAAATAAGCAAAAGAAACACGCAATCGTTCACGAAAATGGCCGC
>Locus_51007_71
TTGTTGTCTCAGTTGTCTGACGAGTAAAACAGCAACAACGCAAAACACACACCATCTCTAAACCCGCTCTC
>Locus_51006_76
GGCATTCCAAAATCCCAACTTGGTTAGTTTGGCTTTGTGCTATGTTCAAGGCCTGTATTAGGATTAAGATGGCGTA
>Locus_51005_78
TGGAGGCATTCACTTCTGGTAAAAAGCACCGGAAAATATGATGAAACAAAAACGATGAAAGATTCCTATGCAAGGTCC
>Locus_51004_79
TCCGAGTCACATTTTTGTGTAAAACATGGTCAGAATACAGGACAAAGCTAAACTCGTGACGACTGTTGAAGGACTAGGA
>Locus_51003_78
GAAGGGTCTTCTATTTAGCTATATAGTGTTTGAATATAATAGGAACAAAAATATGTGAAGGTATGAGAGCAGGAATGG
>Locus_51002_73
TACATGGTAGAGAGTACATGAAGATAGTTCATGAACACACCAAGAATGTAAAAGTCAGAGGTGAAGACACAGG
>Locus_51001_72
AAAGACGGAACAACTTTTCAAAAATATTCTCTAAAGAGATAAGGAAATCAAACGACATACACTATTATATTA
>Locus_51000_76
ACGCAACTTCTTTGTTGTTCACAATCCTCTAAGACATCATGAATTTAAACTCAGCATTGACCTTAATTCAAGGTCA
>Locus_50999_79
GACAAACGGTGAATTCGTCCAACAGATAACCAGAACAAACAAGCAAAGTAAAACCGATACTGGCTCCAATTTGATACCG
>Locus_50998_71
CGCAACTTCTGTTTTTTTCACTATCAACAAAGCAATAATGTAAATGGTCTAAGCCTTGACATTAGTTCAAG
>Locus_50997_78
ACATGTAGAGGAGTTAGAATACACACGTAACAAAGATATTAAGAAATTAAAAAAACTATCTCTTGTAAGCCTCTTCAT
>Locus_50996_92
GTTTCTGTTGTAGTTTCTCTCAAGCCTAATAGACAAACAAGCAAAAGGGGTCAAAACAAGTGAAGGTGTTTCCNNNNNNNNNNTCATATGTG
>Locus_50995_78
AGTGGTAAGTTTGTACTACTAGACATTATTGAAAGAGATCATAAATTTAAACACAGTACCCTGTTCTACTGTCAATCT
>Locus_50994_79
TATCTCCTCTGGACTCAGACAAAAAACGAGGACAACAGAGAAGAAAGCTAAAATGAAGATGGATGTCCAACCGACTGTA
>Locus_50993_72
AGACAGCATTACGGAAAATGTTTGTGCTTTCAATTAGTCTTTTCTTGCCTTATTTTGTTTCACTTTATGAAC
>Locus_50992_93
AATGAGCTGTCTGTTCATTTAAAGGGTTTCAAAACAACATGAAACTAAAATCCTCACAGATTTGGACCAGGCTCACNNNNNNNNNNNNTTTGC
>Locus_50991_78
ATGTCCATTAGAATAGTACTACACACGTGGGCAAAATATGAGTAATGTAAACACCATAACTCATCGAAAGAGGCATCC
>Locus_50990_98
TGCATGTTGTACTTTAAGTAAATACAAGTTCTTAATACAATATTAAATCAAAACAGTGAATACGGAGCAGCAATCCAGTGTATACCGAATGGAGTGGC
>Locus_50989_72
TCCCATTATCTCTGAGAATGACCCCTAACAAACACTGAGAAGAAACTAAGAAGCCAAAGGGCTCATAACGGC
>Locus_50988_71
CGGGTGTGGGAGCTCATGTTAAATAGTGGCTTAAGATACTATCAAGCCAAAGACTTCACCGACCACCACCC
>Locus_50987_72
TGTATGAACCTAAGTGATGAAAAACATTGGTTTAATAGAATACAAACCAAAAGATGCCACAACACCCAAAGC
>Locus_50986_78
CCAGTTCCGAATCTGGTTTTTCAGGAGTTTGTATTGGTTATATATTTTGTGTCTTTATTGCAAGTCTATTGACTTTAG
>Locus_50985_76
GGCAGTCCAAAATTCCGAAATGGTTAGTTTGGCTTTGTACTATGTTCAAGGCTTATATTAAAAATAGGATGGCGTA
>Locus_50984_79
TCAGTTGATGACTGTTCTAGAAGACACAATCATAATAAACAACGAAGCTAAAGCTTTCACCCTCTTTGACTGCGTTGTC
>Locus_50983_79
TTGCAGTACGAAGGGGTCATTGAAGGCTTTCATTTAGTAATATTTTAAGGGTCTGTATTAGCCATCAGATGCACTACAG
>Locus_50982_79
GTTAGGATAGAAGAATGGAATGACGCATTTAGCTTATTTTTGTATTCTAAAGATGTATTACTACTGCACATTGAGAGGT
>Locus_50981_71
AACCTCTAGACATTATTTTTCGTTTAAAAAAATATCAAATAAAATTCTCGACTGCCTGACAGTTGCTCTCC
>Locus_50980_72
ATGAAGGATTCATCTGACGCAAGAAACCTCATCAACATAATACAAAGGAAAATTGTAGACATACGAGCATTT
>Locus_50979_71
GACATAAGTTCGGTGAAACTATACAGCCCTTGAAAACAGAAAGAACAAAAATGGAACAGCCCTTGTCAATG
>Locus_50978_79
TGTGGGGTAGAGATTTGGGCAACACACACGCCCAATACAACATCAATGAAAAAGACAGAGATGACCAGATTGACCACCA
>Locus_50977_79
GAACTGTAAACGGATGACAGAATAAAAATCGATAACATAAAAGAAAAGCAAAGGGTCTATTAGTCCCAAGATGTTCCAC
>Locus_50976_79
GACGACAGATCGGTTGAAACAAAACACTCACGCAATAGACGACAAAGGTAAAACGACAAAGAAGGAATATGATGAAGGC
>Locus_50975_77
GACCACATGAGCTCTGCCGAAACACAGTTGTTGAAGATAATATCAAATTAAACGAAACACAGATCGATATCACCTCT
>Locus_50974_78
AGATGGTGCTGCTTGTGGGTATATACTGGTACAATAAAATAGAAAGGGAAAAACATCATCAATACGAACAATCTTCAT
>Locus_50973_72
CATCCACCGTCAATTCACGAAACAAACAACATCAATAGACGACTAACCCAAACCCCTTACCCACCGCCACCA
>Locus_50972_78
AGTCTGACGGTGTTTAAACTAGATACCCGTGTAACAGAGAAAGAAATCAAAGCAAGTAACTGTGCTCAGCATGCCCGT
>Locus_50971_72
ACTGAGGGACGTGTAGCAATAAAAACTAGTCTAATAAAACAGAAATGCAAACATGAAATCCGCTGTTATTCT
>Locus_50970_95
TGAGGAGTAGCGTATCGGAAAAGATAAGACCCAAAAATAACATCAAGCCAAATTGTTTAGTTCTCACTACTCTTCTATGNNNNNNNNNNNNNNNN
>Locus_50969_85
TGTTTTTTTTGGTGGTGTGCATTCCTGCCTCTATTTGCTTTCCATTAGTGATGTCTTAATCCACTATTTTGAGTTTGACACTGTC
>Locus_50968_71
ACTCGAGTCGGACTAAGGCTAAAAAACTGCTGAATATACGACCAAAAAAAAGCAAGAATGAAAACATACGT
>Locus_50967_78
TAGTGCGTAGTGATTAAGCTATACATCCAAACAACAGACAAGAAACATAAAAGTCATACATTCTGTCAGCATTCACAG
>Locus_50966_101
AAAATGCCCCAACAAATTAATTGTTTCTAGGTTGGAGACGTTGTGCAGAATGCCATCTGGACGTCCCACCTCGGACCCACCATTGCTCAGTCTGTCGGCGC
>Locus_50965_75
CAACTACTCCAGTATCGACAAAGAGACGATCAGAAAAAAGAAGCAAGCCAAACCGTGGAGGGGAAGGGAGCTGTG
>Locus_50964_78
TCAGGCGACAATATGACCGTATAAACGTCATCAACACACTATGAATACAAATAACAAATTCGCCCACACAAGCAGAGT
>Locus_50963_91
ACTTCACCAGTTCTAAGAATAGAAAGGTCACAAAAAAAAGATTAACGGAAACAAGAGATGTTCCTGTAGTCAAATTTTNNNNNNNNNNACC
>Locus_50962_79
ACGTGGACATAGTCGATTTTTGAAAGTTTTTGTTTGCTAATGTATTTCTGTTTTATTTTAGTCCTTGGCTGAGATGTGT
>Locus_50961_79
TCCAGTCCAATTGGTTTTCGAATACAACCTGACAACAAACGACCAATCTAAACACACAAACGCGAATGAGGACGGCAAC
>Locus_50960_79
GATGTTGTAACCAGTGAAGCAATAGATGCACTGAATAGACGAAGAAACGAAACCGTCAATCGTATGCTAGTGACGATGA
>Locus_50959_79
GGGTGGCGGTGATGTGTAAAAACACATCATGAGAACAGAAAACCAACTGAAACATATGATTTTGTACAACAACATTTGT
>Locus_50958_76
TCAAACCCAGTTACTACTTTAAAACACAGGAACACATGATGAACAGAAAGGGCGAACAAAGTGTCAGACAGTTGAC
>Locus_50957_78
AGAGTAAAGCTGTTACTGTTAGATAGGAGTCTAACACAAAATGAAATTAAATCTTACATCAATACCTACGACAGCAAC
>Locus_50956_65
TTGTACCTAGTTTGTTTACCTTTTTTTTATGTTTGCACAGTTTATTGGAAATTGAAATCATATGA
>Locus_50955_72
ACCGTTGTGGAGACTGAAAGAACAAACAATTCCAATATACCATGAATATAAAGTATGCACGACCAGCCATCA
>Locus_50954_77
GAAGTCGTTCCAGTTCTACTAATAAACGTTTCAAAGACACGAACAAGACAAACAGCCGATGGCAGCTGAGGCATAAC
>Locus_50953_85
AACCAGTGGATTTTCGACGTATATAACGTTGCAATAAAACAGTAACTTAAATAACTCAATGAATAACAGGTNNNNNNNNNNTTTG
>Locus_50952_79
AAGGTGTTGTCGTTTGTCTGAATACAGTACAACAAGAAAGCAAAAATTGAAATGATATATCTGCTCGGACTGTCATGTC
>Locus_50951_77
GGTGCGGCTGGTTGTACGTTGACACAGCAGTAAAACACCAAGAAAAGAAACAATCTAGCAAGGGTGATAAAAAAAAA
>Locus_50950_71
GTGGTTCAGTAGGCTATGGAAAGAAAGAGGCAGAAGAGATGATGAATACAAACAGACAAGATAGACAGACT
>Locus_50949_97
TACAAGGACACGTTTACAACAAGAAATCACATGAAAATAAAAATAATCGAAACGCTTTATAAATCCAAAATCTTCTGAANNNNNNNNNNAAGCATCG
>Locus_50948_78
AGCCGGAACGGAGTTCACCTAGACAGAATATTAACAGATAAGGAATGCAAATAACAGAAACCGTCAGAGTTAGGCTTG
>Locus_50947_84
GAACAAAAATTCAAGAGAATGACCCAAAATAATGAAAAAACATATTATTAACATAAATAGGAAAGATCTGTCAATCGGGGTGAT
>Locus_50946_79
TGTAGGCCCCATAATGTCCCAATAGACAAAACTAAAAGAGCAGCAAGGGAAAGCGATGATGACGGAGCAACAGGAATTA
>Locus_50945_86
TCGTTGAGCTAGAAGTTGTGAGCCTTGAAAAAGAGCATCAATCTAAATTCTGAACTCTGGTCTATATTTATCCANNNNNNNNNNNT
>Locus_50944_72
AGGTGGTCCGTGTTACTCATAGACATACTTGGAATAGACAATTAAACAAAACGCTTGACCTGTGGGTAATGC
>Locus_50943_80
GGTTTCGAGATTTGTTAAGGAATACACGACGCCAAAAAACCACAAACTTAAACTCCAAAGGGATAGTTAAGCATCGGGCA
>Locus_50942_74
CTGGGTCTTCAGTTTGGAAGTGCTGAGTTTCAATTACTAATGTATTGGTGGAATCTTTTAAAATTGTCCAATGC
>Locus_50941_73
CTGGTCCAACAACCTCAACCAATAGACCTGGTTAAAAAAGGAGGAATAGAAAGCGCTGATGAGGCGGGAGGGG
>Locus_50940_76
AACAATCTTCTTGACAATTTATAGTGACATAAGAAAGCAACAAGTGAAACTCCGTAGATTGTGGAAGCACCAGCCG
>Locus_50939_79
TAGCCACGCAGCTGTTTACAAATAAAGTTGACAAAGAAATGAACAATCAAAAGTCCTGAGAAGGTCAGAGGGTCAGGTC
>Locus_50938_71
AAACTGGTGTCCTTTTCGAGAAGAAACCGGCAAAATATATAATGAAACCAAACAAAAGAATCTTGACCACT
>Locus_50937_93
CATCTAATGTTTGAATGTTAAAATTCTCAGAATATACTAGTAATTGAAACCATTTATTGCCTTGTAATGCTGGCACTTGGCGCCCCATCAGAA
>Locus_50936_72
TACTCGAACCGTTGTGGTTAACACGGCATCAACAGAGGATCAAGACAAACCGAGGACACAGAAACAGCCGTA
>Locus_50935_84
TACGTGTAGTCCCCTCAGGGAAAAAATGCAATTAACAAAGAAGGAATTGAAAGTGCCCAAGTTGTGGTAGATNNNNNNNNNNCA
>Locus_50934_74
GGGACGTGGTGCAAATTTTAATAGTCTCAACAAACAAACAAGCTAAAATGAAGACCGCTGTTAATCTGGCATTC
>Locus_50933_78
TGAGGACAGACCTTTGAACTACATACCCGTTGAAGACAAAAGTAACGCAAAAATTGGAAACTTCAGCACGTGTCAAAT
>Locus_50932_76
GAAGAACAGAGTTCGGCTTCACAAATTCTTAATAGATTACCAATCCAAACAAATCAATATCAAAGAGGAGCCAGAA
>Locus_50931_77
TGTCCTTAATGTTGACATTTTATATCCATCAAACATACAATGAACGCAAACTTCTTAATACCAGGAATCGCCAGGCT
>Locus_50930_99
CTACTACAAGGACATGTTGAAATACAGTAGTCAAATATAAGATAAAATCAAAGTCCAGATTTTTAAATACAATATCTNNNNNNNNNNATTGTCTGAAGC
>Locus_50929_78
GGAGCTGAGTTTTAGACCTTAATTCGACAAGACAGTTTCAAAAGATCAATAACATAAAGGATGTATCTCAAAACAATG
>Locus_50928_79
TACGTTCGAAACTGTTATAGAACAAACGTCGTCAAGACAGGACAAAAAAAAACCGAAGACATCAGAAAAGTGCACTGGA
>Locus_50927_79
TACACGTAGAGTCGTTACGTAACATATCCTTCAAACATAGCACAAATGTAAAAACATCAACAAAATCCAGCATGTTGAA
>Locus_50926_119
CTTGCATGTCGGAGAAACCCAGCACCCACAGAATTGAAGCACACCAAGATTTATCGGGCAGAATAAGCCTCTCACGGCTTACAAGACACAAGCCTCCACACACAGCCCTTTGCGGCGCA
>Locus_50925_74
CATGTTCAGTTATCGTTATTAGTGTGTGAATATATAAACAACACAAACTCTAGAAGGACGCCGAGGTTCTCTCT
>Locus_50924_116
ATACAAATGCATTTCCAGCTAACTGTATGCTAACGTAGTATTGGATTTATTTATTACATAACTGCACCAGTCCTCTCTTGAAAGGCCATACATGCCGAAATGTCTGGCCTTACTCG
>Locus_50923_74
CTACTACCATTTTCGTCAAGAGCTGAAGTCTCTCCCAGCACTGATGAGCTGGTCAGTATGATGAAGAAAAAGAT
>Locus_50922_97
GAGTTGCAAATTTCTACTAAAATACACGAATGTAACAAACTAACAAGTCAAATCCAAGAGTTGACCTTAATAAAATACTNNNNNNNNNNCCATAGGG
>Locus_50921_96
ACTTCTCCCATCGACATCACATGGTTAACCATCAATGCACCCACCCTTTTTATCAACTAGCTAACTTGTGCGCTGAGTTGGAATTCGGTCATACAG
>Locus_50920_73
AGTGAAATCTTCATCCGAAATTAATAAGCTTTTCCTGACTTTAAAAGTTTTTATGACTAGATAAATATGGTAG
>Locus_50919_86
ATCTGTCGGACAGTTGACTTTGTGAACATATTATATGTTATGATTGAGCCTCGCATGTAAACACTCAGCTGATCAGTACGCAGCCC
>Locus_50918_166
AGTGAAACTTCCCCTACTACTGGAAATAATTTGGTATCATGTTGAGTTTTTAGGAGAAGTAAGGACCCATGGATGGGTCAGAGCTAAAACTGTTGAAGTCTTTGGTCCACTTTCAAAAGATAATTAGGTCTGGCACAGATTGCAAATGTTTCGCCACGACCACAGG
>Locus_50917_96
TAACCGAATTCGCTTTTTAGAAAACAGTTAAAAAAAACATGATTAACAGAAACGTTACACTTTTGACTATTGTGACTTGNNNNNNNNNNNNNGCAC
>Locus_50916_80
CGTTAGAACCTGTCTGTGTTGCCAGATGCTTGTCTTTCCGATCATCTATTTAACAACCTGGACAAAATGATGTCTCACTA
>Locus_50915_79
GTGGTAAGTTTGTATTACAGAACATAATTGATCAAGATATTATCAATAGAAACAGTTCACTGTTCTGCAGTCAATCTGT
>Locus_50914_76
ACCCACCAGTCTCCGAGTATCATTTATCAATGCGGACGTGGGACGTGGGTATACTCCTCTGCGCTCACGCCCTTGC
>Locus_50913_71
AATTCAACAAGAATGTCGAATGTACTGCTAAAGATTATTGTGCTTCTAGTTCGCTTCTCTGGTCTATTACC
>Locus_50912_107
CGGTAGGTTGTTCGGTTGTAATGGCCAAACGAATAATGGACTTACGTTACTTCACCCGAATCAGTATAATCGGCCTTTGTTATCTAGTGGAAACTCATAAACAAGCA
>Locus_50911_71
GCACGGTTCCGGTACTTTAATCTTGATGGATACATGATCAAGACCGGTCAGCCCACTACTTACTACGTCGA
>Locus_50910_79
CCATGGGATGATGAGACGCAACTTGGCTGAGATGGAGAAGTGTGTTAAGTCGATCGAAATCGACGGTTTGGTTTGGGGT
>Locus_50909_209
TTTTTTTTTTAGGAAATTATTTCTTTAAGCTAACTCAATCATTGAAACTACTCACAATTTCAATTGGTAATCACAATTACTGCAGCAGGCTTTAAATTCAGCCACCTGTACAGACCTCGCTCACATTTAATAATACATGTATCAGAATGCAAAGAAACATTTNNNNNNNNNNGGCTGGCCACTCACCAACAGAATGCAAAGAAACATTT
>Locus_50908_145
TTAATAAATCTAAAAGTGTTGAAATTAGGAAAGCAAGTTCTTACTGGCAATGTCCTTACACCCTCACCCCATCAGGAAATGGTAGGGGAAAAACATAGCAAAAATGAATGTCTTTAAATTTATACTTATTAATTGATACATATAA
>Locus_50907_143
CACGCGTACAGGTCTGTGTCTCACAATTACTTCCTGTTTTAAGTTGTTTATAGTATCCGGTGTCACAGGAAATATTTGTACTTTCGTTTTGATAAGTTTGAAGTACGAAAGCCCCGTCACAGTCGTGACACTTAAGTGGAAAT
>Locus_50906_127
TTTACAAACTCAAACTCCGGTCGTCGGTTTCAAATTGAAGGTTTCTGGTTATGCAATGATAAATTAATTTCTGACATTTAAATTTAGCTTAAGTAGACGCGTCTTGTTGTTGTGGGTCCTACGCCCA
>Locus_50905_119
CCCATTAGAATCTTTATTCCATAATACCTGGTACCCTGCTGACGATGAACGTGCCCACTTCGTTAGAAAAAGCAATTCACCCAAGCCATCAGCTGGAAGAAAATCCGTCACACCCGGAT
>Locus_50904_88
TTGTGTTAGTGTTCTGTTATCATTCAGAAGTGAACTGCTAAAAAAAACGAACCCCGTTGAAGGAGTTTCAAGTCTTTCCTCCAAATAT
>Locus_50903_72
AGCCGAAGTCTCTTTATACTTTTGACTCTCCATAATAAAATACATGTATTACAGTTCTTCTGATTTTAAAGG
>Locus_50902_97
CCTGGTAATCAATAGTACTGTCTCGTCGTGGACTTGCTTAACCCTACTCCCGCCTCTGAGGAGCGCAAGCACAAGTTGAAGCGTCTCGTGCAGGGAC
>Locus_50901_129
AAAAACATGCACACTTGGTAGCAAGTGACAGAAGTTTCGTTTATTGAATCATCCTAGGTGCGACGAGAAGAAGGCAAGCAGCAGGCCCTGTGACGACAACACCGAAGGCTAAATCGCTTCCTTCATTTA
>Locus_50900_78
TTGACAGTTACCGGTTAACGCAATGGTGTCAATACTGTCAACTGGTCAATCACATGATGATCTCGACCAGCCTTTCGG
>Locus_50899_199
ACGAACCTAAGCCTTACGAGTGCGAGTGTTGATGCTGCTGAGGCTGCTGTTGTGTGTTTGTCTGCTGTTTTGCGGATGCATTTGAGTCGCTCTTTATCAGTACAACATATATTGTGCTTTCGTTATTGATATTCAAGTCTTCCAATTTTGTTTTCTCGGAGTTGGAAACCTTGGATTTGTTGAAAAACAAAAGAATTTT
>Locus_50898_96
ACTTACAATGTCACATTTCTCTTGCCAGTCTCTGGCAGGATGTGTAAGTCAGAATGATGTGACAGTGAAGAGCACCTTTGACATAGCTTTCAACAG
>Locus_50897_118
CAGCCATTCCCATTTAAGGTAACTACTACCGAAAAGAACAAGTTCTTAGGTCCAAGAAAGAAGCAATTGGAACAAAAGAGATTGGAAGATGAAAAGAAGCTCCAAGCTTTGAAGGAAA
>Locus_50896_156
CATTCTGACAAGGTATTGAATAGTGCAGTCAGCTCGAAAGAGCGCATGCCAAGAGACTTCTTCTCGTGTCTATCCACTCCGGGGAATTTCAGAAAGGGCTGCGTACAAGAGCGCAGCCCCTTTAGAGATACATGTTTTGAAGTTGATGCAATTCCT
>Locus_50895_72
GAAGATACAGTAGGTTAAACAACACAGGTTGGGAAAAGAAAAAGAATGGAAATAGTGGAGACATCACCATTG
>Locus_50894_89
TCGAAAGTGAGTAAACGCAGTCGTCGAGCGTATTGCGTTTGGTTTAATGATCTGTTCGCAGTCTCTCTTCGTTCTCTTTTGTGCTTATA
>Locus_50893_89
GCCGGTTAGTTCCACGTAGAAGTGTGGCCGATCATCTACACCATCGTCACGATATACCTGGTCATTCTTCCGCTCTACGCCAGCCCAGT
>Locus_50892_93
CCTGTCAATCGGGGTACAGGACACACATCTATAATCACCCATGTCATTAGAATCTCTCCGGTAGGGATAACAGATGGCGCCGTGTGCACAACC
>Locus_50891_72
CAAAGACAGCTTCAATAACTTTTAAGTTCCTATTTTATTTAGTGTCTGTCTTCCATCTTTGTCACTGTCGAA
>Locus_50890_71
ACTTGAACTTCTTGCTAAGGTGAACTATGTTTTCTTTCAGGAGTTTTCTGTTATTGGACTTGATGATGGAT
>Locus_50889_83
GACACGGTTACTTGGTCTTCGACCAGAGTTTGAATGGGACAGATTAAGTGAGCTGCAGAGGAGAAACACTTTGTGCCCACCTC
>Locus_50888_99
TTTGTTGTTTTTGTTGTTGTTAAAAGCATGATTCACGAGTTGCATACGCGCTAGGCTGGCAAATAGTTGGTCTCGGGTTCAAATCTCTTTGAATGCAGA
>Locus_50887_71
GGTTCTGGTGGCTCTGGTGGAAGGACTCCAAGAACGACAAGGCCCACAAGAACACCGAGGCCCCATCCGAG
>Locus_50886_91
CGCTAACCTCTAGAGTACTCGTCTGCTTGATGACTGATTTTCTGTGATCACAGCACTTTCACTTTTATTTTCTTCATTGTTGGACGGTATC
>Locus_50885_131
AAAGAGCGTATAACCATCTTAAAAGACAAAGGGCTATTCAGAAGAACTAAGTATATCAGTATAAAAAGACAAAGGGCTATTTCATCAAAGACAAGACTGGTGTTGTGTTGTACAAGAGACTCAAAAGCTCC
>Locus_50884_79
AATTTCGAAGTCAACATAGCACTGATGATGACTAAGACGAAACCCACAAAGCTAATGAACAGAGATGACGTTAGTCCAA
>Locus_50883_71
AGGTTGTGTGGTAGCGAAGTAACGACCAAAACAATCAATGACATTATCACAATGGCTTGGATCAAAACTTA
>Locus_50882_128
ACCTACTAACTTCCCTCAATCTAACAAAACAATTAACCCCACAACAACACACAAAATATGGCGAAGTGTCAAACTTGCGATAGAACTGCCGGTAGAGTCCACCATATTACCTGTGCTCACGGATGCAC
>Locus_50881_138
AAAAAATAAATAAAAATATTGTATGTCTTTAACTGTTTTACGGAGATTTAGAATTAGTGAACTGATGCTTGCACATATAAACACTCACGTGTACTTTGAAAAGAACAGATTACTTAAATCACACCAATTGGTTTCATT
>Locus_50880_71
TGCTAAGCTCGAACTGGTTTACCCACAAAGAGAACGACAGTGTTTAAGACAATGGCCAGCAGGAACCAGAT
>Locus_50879_81
GTCCTCTCAGCGTATAACTGATGGAAAGAGCCGCATGCGGCGCGCGAGGCGCAGGTTGCAGACACCTGTTTCAGAACGATG
>Locus_50878_116
AAATAATATGGATCCGACGTCTAGCAAGCTCAACAAGACCAGTTGCAAGTAGCAGCACAAGCATCGTCACTGCCAAAGTTGTTAGGACAATATTGTGTAGTTGGATCGCTCACTCC
>Locus_50877_82
CCTTAAAGTTATCTTTTTTCTGAACTGTACATTATACACACCTATTATTTGTTTGTAGAGATACGTCACACTGAGTTAGAAT
>Locus_50876_72
AAAAGAGGGGAGCACACAACAGAAAAAGTCACAAGCACACCGCTGATCAAAAAATCATTTAATTTACTTTGA
>Locus_50875_93
TTGTTAAGTCTCTTACCAAGCATTTCAGCATGAGCTTCACCATGAGCATGAGCAACAGCGCCGCTATCATGACCATCAGTACCTTCCAAAATG
>Locus_50874_77
TGTTGCGTCCAGAACCTGACGAAAGCTGCTTGAACCTTAGGGTTCGTGAAGTGCATCACAGTTCCATCGTCTTTGAA
>Locus_50873_159
CGGCCACCACCGATGATCCCATCCAAACCAGACCGACTAATTGCGCTTTGGCAACTATTGCGAGCTTTGACTTTAGTCCCCCTCGCAAGCGATCGGGGCAAGCCACGACAACTAAACAAAACTTTTGCTCCCGCCCCCCTCCCAACAAAGACTTGTTCG
>Locus_50872_138
AAGGAGACGCAGTGACTGGTGTCATTGTGTGCTGCACGGGGAAATCTTCTGACGTTACTGATAGTGATATTTAAACAGGAAAATGTCTACAACTGAAGGAACATCTTCCAGCTCTATGGATTCTACTGAGAAAATTGA
>Locus_50871_170
CTTGCGGGGCACAGTATCCACAGCTAAATTTAGTAACATAACATCAACTTGGACAAGACGGATGACACGCTGGGGAAGACTAATGGCCTCACCGAAAAACACATTGGTCACTGTACTTACTGCTTAACCGATGCGTATATATTTTACTTTACTTTGGTCTCATGGGTTAG
>Locus_50870_77
TGTGTAACAAAAATGTTTTAGTCAAGATGCGCTGCGGCTGTCAATCACAAGACGTCATCGACGTCTCAGATGAGCGG
>Locus_50869_93
TACGGACGTCTCTGGTCGGGATTCACCAAGTTGCTTGGAACCGTCGACTTGGATGAGGGGAATGCGGTGGCTCTTGCAGAGAGCGCGGATGAG
>Locus_50868_117
TAAGGAAAGAAGTATTGTGTACATGAGTCAAATAAGGAGAGCATGTCTATATTAAGACAGCTGTAGCACGTTCTTGGGGGCAAACAGCGCTAGCTGCGCCTACACATTCAATGATCA
>Locus_50867_249
TTCTGCTTCGGTGCTGCCGCAGGGAGATCATTCGCAACATCCGGCAGTCCGAGGATGGCTACCAGCAAGCCGTGAATGAGAACTACCAAGTGATGTCCGACTCGACATTCAAGGCGCTGCGTCGTCAGTTGCCCATCACGAAGGCGAAGTTCGACTGGACGAAGATCACCGCGTACAAGATCGGCTCCGAACTTAAGAATGCTTAAGCCAATGAATTCCTCGAATCTATACGTATATCGAATCATTCCA
>Locus_50866_88
AGATAGAGAGCACTACAAGTATAAATCAGGGAAACAGACGAGTAACCTAAACTACAGATTACTGACGACACAACAACAAACAACAAAC
>Locus_50865_74
ATAACGGTCTAGGAATTGTCATCAGATCAATATAGAAACAATCAAAACTGGCCATTAAATGCTACATCTGTTTA
>Locus_50864_95
ACCCTTACACGTATTATTTGGTTCGACAAGTTCAAAAAATTTCAAGACTTTACCCAATTTCTTATCAATTTTTCTTACAGTTTAAAATGGAAGAA
>Locus_50863_74
CCCCCAGCGACAACAAACAAGATTTCTGCTCTCTTCCCTCCAACTCCTTGCGGGCACACTGCGTTGGGGGAATA
>Locus_50862_79
CAAGTCCAAAAAAGTTACACGTACTGGAGCACAATCATCAGAGAATGCATAATATGTCAAAGAGGGATTCCCGATTTCC
>Locus_50861_73
ATTGTGACTATTAGAGCTTGTTTCTTCCCACGCTCTCACTCAATGACCTCTACGTCATCCAACACGCGATTCA
>Locus_50860_94
TCAGAAGAACTGAAAGAAGTGCAGCATTCGATGAAGCAGCATTGCCTTTGTTTCGACGAACTGGATTTTCTTCAGGTGGTGGTGTGTTGTGTTT
>Locus_50859_95
TGCTTCTCTTAATATATATAGGATGGATAGAACCTTGTTATTCGAATGTTACAAGTGACTACCTCATCATTTATAATCATCCAAGACAACGAGCA
>Locus_50858_81
GGAATGGACCGGAACTGTACTCTGGAATCCTGCAGAGATGCGGGAGTGCCTTCGGGAATCAGAACACAGGTGCTGCATGGC
>Locus_50857_77
CCAACAGGTACGATTTCGGTATATATGCCTTAAACATATCAGCAAATCAAACCTCAAAAGTCTTTTCATCGAAATTC
>Locus_50856_76
GGAGAGGAGGAGGAGAAGCAGCTTTTGCTCAGTTCAGAACAAAACTAAAACAAAAACTATCAACATGGGTCACTCT
>Locus_50855_85
ACTACCTCGTGTTTCAAGACGTTTACAGCGGAGCACAAGTGGAAGCCGCCATCTGTAGATCTAATGAACCACTTGAGGTTGGGTT
>Locus_50854_73
AATGTACATCAACAACCCGAATGTAAAAAACATCTCAATCTTCTTATCATTAACAGCCAGCAGCAGGCAAACA
>Locus_50853_77
GGTACTTTCAGACCGAGTACTCTTGGCTAGTTGGCTTGAAATGATATGTTGGCTGCACCATGAAAGTCTGGCTCATG
>Locus_50852_110
AAAGTCGAACCGGATAGAGAGGAACGGTCCTAGCAAGATCGCGCACGTGTTCACCATCGCTGGTGCCACTATCCCCTTCTATCTCTTCTCCTCAGCCTACCGCGCCACCA
>Locus_50851_71
GGGGTAACTGTAATGTATTTAAAAATTATTACAATGATGTCTTCAAAAACAAAGGCCCTGCAGGGTTGAAA
>Locus_50850_91
AGTCCCCGTCATTGGGAACAATGAAAAAAAGAACGGAACACGGGCAAAACAAACGCCAAAGACAACATCACANNNNNNNNNNNNNNNNNNA
>Locus_50849_123
AAGTTCCGGGAGGTCGAAAAGTACCCCCAATGGAGTTTACTAGAGGAGGGAGCTACTACAATAATTCTAGACGTTATGACAACGATCGACGTAAGCCAACTCAGTCATATTATCAACCACCCG
>Locus_50848_81
AGGCAAAAATCCGGTAATAGATTATGTCTACAAGAAAACATTCGGTTATAAATTGTGTTACTTAGTAATAGTTTATTTTGG
>Locus_50847_80
TACGTCCCTGAAGCCTCTTGTCGTCACCACAGCGGAGATGAGGATGATGTTCAGGTCAGCAACCAACAAAGTCTCCCCAC
>Locus_50846_115
CACTGGTGTAGGTGTAAGCACTCTCTCACGCCAGCAAAGACCTTCTGTTGACCATCCTCTGTATGTCTCACATTCATCATCAGACTTCGCTATAACCGTCGGTGGGGCGCTCTCC
>Locus_50845_100
TTCTGGAGAAATGCACACAGATCCTCTTCTGGCTTGCATGAGTAGGACTTCAGGCACTTTTTCACCTCCTCAATCACAGTCTCGTTAACCAATAAGGTGT
>Locus_50844_145
TTTTAGCTGAGAAATACGAACTGTTATCCATGACGTGATGTTTGGATAAATGACCACGGGTCACCATATGCCAGCAGAGTTTGAGTTATTCTGTGATTCTGTTACATCCTTGTCTGTTAGATAGCTCACACGTGATGGTAATGTA
>Locus_50843_91
CTACTGACTTGGTGGTGGACTCAAGTTCTCAAAGCCCCTTCCAGCACCAATTGAGCAATCTAAGAAAAAACGAGGTGGCAGAAGAGCCAGG
>Locus_50842_100
CGGAGACCACGGCTTCCAGCTTTAATCCAAGTACCGGAAACCTTATCGAACGAAGTTTTGGAAAAAATGCATGCACCACCCAAGGATAAAAATGTTCCCA
>Locus_50841_71
TCGCTACTCCAGTTAACAGGAACTAACTGCACAAGTAACCATCACATCAAAAGTAACAATGGAAGATGTAT
>Locus_50840_72
CCGTGATGTCACAATTCTTCAGTGAAAAGAGAGACATAAGGCTGCAGAAGGAAGTCATCAACCAATGACGAT
>Locus_50839_164
TAGTAGTATATGTAGTAGTCCTGTGCCGGTACCATCATCATATACATCATCTCCGCCGGTACCATCATCATAGTCACCACTATCTTCAGCACTGTAGTCACCAGCAGCTTCGGCAACGTAGTCTCCATCGTTGGAACTATAGTCATCACCACCTCCATAATCAC
>Locus_50838_71
TTTTTAATTTTTACTTTGTAATATATTTCAAAAATTAATTCCATTAACATAAATAACTCTTGTGTTGTTAT
>Locus_50837_71
TTTTTGACTAGGCAGAGGCGAGATAAAATAGATATAGACGCTATCAGGACAAACGTGAGTGTCCATGTGGT
>Locus_50836_88
TCATTCCTCGTCGTTAACTTACAAATAGGCAGAAGACAAGAGAAACACAAAAAGCCGATTTCATTGGAGCAAAGTTGTCATCTGTGAT
>Locus_50835_134
AGCCTGAGCTGACCTGGCCTGCAAGCAGCCTTCCTCTTTGGTACGCACACTACGATGGCCAACCAAATTTCGGAGATTTCAGAGCGTTTGGCGGATGGACAAAACCATCGATCAAACAATACAACGGAAACAAG
>Locus_50834_97
TAAATTGATGAATGGTTTTTAGGAAAACCGCAATTGCAACTTTCCACAACCATTCCTCCCCCGATACTAACTTCCCTTGGCTCATACGAGCATTTTT
>Locus_50833_71
ACATCAAGGTCCATTCTACTATGAAAATACAGGGCCACCCTTGTATAACCAAAGAGAGTGGACAGCGTAAC
>Locus_50832_72
TTGTTGAGTCGAGATTGTGGATTGAAAAAACAATAAGAAGCGACAACGAGGAACTCTATGTCTGGATCTCAA
>Locus_50831_84
ACTTGCTTAGTAACTACTTCTCGATGATGGCACCAAAGTAGACAACTACGATAGCATTGCCCTCTTTGACTTGAAAGTCGAATA
>Locus_50830_100
GGTTGACTTCCATCGTAAATATTTAAAATAAAATACTATCGAACAACAACAAACGCTTGTGAGTCTTTACCATAGTCTTTGACAACAACAGCTCCACAGG
>Locus_50829_71
GGTTTGATTCCGGTGGTTGAATACATGTTCAAAATGAGAGGACATAATAGAACGTGTAGTCCCAGTTCTTG
>Locus_50828_73
TGGCCCAATAAATCGAACATATGACTGCTGGTGCAAAGAAAAAGGAGGCAAAGCACACACACACGCTCACACA
>Locus_50827_73
AAATGCGGCGAGGTGGAACCACCCAAAATAAAAACATATTTGAAAACAACAAAGTTGCTGCCAAGTTCCTCAT
>Locus_50826_72
CCATTAGAAAAAGGAATGAGAACAAAAAAATAAAGATAGGTTTCAAAAAAAAATGGTACTCTCATCCTCGCA
>Locus_50825_213
GTACAGGTACTTATGCGTGATGAAATCGGCCAAACTGACGCCCAAGAACGGCGAACCCATTTCACTGGATTTTATTACCATTCGAGGCAACAATATTCGATACTATATCTTACCGGATAGCCTTCCGTTGGACACCTTACTCGTAGACGACACGCCGAAGGCGAAGCCGAAGCGCGAACGAACTGGTCCGCCGGGCATGGGCGCGAGAGGTGG
>Locus_50824_73
AGACGTCAGGTGAGTAGGTGACCCAAAAGATAAGACAATGCCTGAACGAGAAAAATTCGGACATCGTAGCTGC
>Locus_50823_80
ACAACGGTCCAGGATTAGATAAAGAAAAGCGTATTGCCAGAACAGTAAGGGCTGGGGTTTTTGTTATTGTGTGTTTTGTT
>Locus_50822_237
TGGACGTCGAACTCTCTCGAGATAACCAATGTAGAAGAGTGCTAGAATCTCCCTTTGATGAAATGGTGGCAGCACACCTGAGATGCTGCTGGGCTGTAGGCAATCATGATTTTCCTGAAGCTTACAACAATCAAGCCGTTGTTGTACAATCCTTCCTAAAAGCGCTGCAGTCACAAAAAGAAGAAAATTGGGCTTTGCCAGTGATGTTTGCTGTGTCCTTAGATCTTCGTCTTTTTG
>Locus_50821_122
GGTTGGAAGGAGTATTTATATTTCCAACACTTTTCTTAGTTTGGCTTAAGAGTTTCTGCTTGACATCAAACTTTTTATTTTTCTAATGTTATACATTCCCAATGGGAGCAATGTTGTACAGT
>Locus_50820_87
GTGATCGCCTCAGACGTACCACTGCCCTGTGGGCCGGGCAGGAGCTTGGTGTCTAGAAGATTGCCCCGCTACCTTCTACGGCCAAGG
>Locus_50819_72
CCGTCTGTTCACCTGGGAACAAACAAAAGATATTGCTATGGTAAAATAATCAATTGCACTTTGATGGCGTGC
>Locus_50818_123
GTCGTTGGCTGTCGGCGGCTGCAGGCCGATAGTGGTCAGGAGCTGCAGGAGTGCAAAACTCCGAATTCATTCAGTACAAGTAACACGAAATGCAGTGCAAGCGCCAAATAGACCTGAGCCGCC
>Locus_50817_73
AAAATGAATTAAATTAACATATAAAAAACATATACACATATCTAGAAAACTAAACTCATCACAGTCTGTAGCT
>Locus_50816_72
ACTTTTACCGGACATGGCGAACTAAAAAGATAGTTGTAAGTTCAAACAAAAAAGTTATCCCGTCAACCAACA
>Locus_50815_73
CCCAGACAGAGCGCAGTGACATTCAAAATACACCGCAATCCGGCCAGTATCAACATTAGGTCATGCGATCTCT
>Locus_50814_95
AGGATTCTGACCAGGAGAGCGTCTTTCACCAAAGAAAATTGGTGACGATATCGCAAAAGCCACTGCAGATTGGAAGGGATTACGTATATCGGCAG
>Locus_50813_95
TGCTTACGAAGCAACGCGCCAGCCACCAGCTTTGAATTTTTGCGAACGGTTGATGATGTTGTTTATGAGACATTCAATGCAGCAGCATCAGCACG
>Locus_50812_122
TCAAACTTGCGGAAACACAGAAACAAGAGCGTCCTCCGGGCATCAAGTCTTTATGACTTCACAAAGGGGCTCGGTTCATGGTGATACAGAAGATAGGGTCCGTTCACAATGCGGATTTATTT
>Locus_50811_82
CTGTTGCCAGAGGGAATGCTACAGAAAATACACAATAACTCCAACAACATCAACATCACCACAGATGCCGACTACTACAGAA
>Locus_50810_71
CTTTAGTTTTCAGTCGACATAACTATAGGTATAAGTACCTACAGCAGTAGAACTTGGGCACAAGACAAACA
>Locus_50809_78
GTAACAAAGCAATTTTGGATATACACCGCGACAATATATGATAAACTTAAACCAGTCAGGGTAGAGTATATCTTGCTC
>Locus_50808_71
CGCCTGGTCTTTCAAGAACTCAACTGATATCAGACAGCTCAAGATAGAACAGCGGACCAGAAAGTTCTTGA
>Locus_50807_123
AGGCTATTATGATTTCGCTTGATCCATGGAACCCTTCCTCGGCAAGGCGAAAGCTGTTTTATTTTCGAAGCTGCACTGGTTGTCAAACACTTCTTCAAGGTCTCCGTCTTCGAGTCTGAGCTC
>Locus_50806_74
GGGACCTCGTTCGGCTTCTTATGTCTGAAAAAGATCAGAAACTGAAACCCGGGAGGCGGGGACAGATTCAACAA
>Locus_50805_91
AAAAGAGGCCACGGAGGATGTTTTCAAACCTATACTGTACATTTATGTCCATTACTTAAATATGAAGTGAACCAAGATTTTAGATCGGAAG
>Locus_50804_79
ACGGTAGGTATTGTTATTTTCCAAAGCGAGAATCATCTGCTAGTAACGCTTGTAAGGCTTCAGTATGAAATTTATTGTC
>Locus_50803_92
CCAGTCGAAAGCGGGTATCATTTGGTGTTTCATGTTCCCATTGTCTCGTTCTTCTCTCTCCGCTCTGGGAGGTCTGTGGGGTCAGCCAGTTT
>Locus_50802_96
AATATAAATCTACTACAAGTAGAGACACTGTTAAAATAGTAACAAGTCAAATAACATATTAGTCCAGATTTTTAAATCNNNNNNNNNNCTGAATAT
>Locus_50801_98
TATTTTTTCTCTACTATTTTGAATTGATTGACACTCGATCGAGAATCACTTTCCAAAACTATCACAAACACAATCGGTAGGTTCGACACAATTCGATG
>Locus_50800_167
CCTATGCTCTAACCGTCCCGAATCTCGTGGAACAAGCAAGGCTTTTCATGGCATCAAATCGATTGAACGAAGATCAACTCAAGCAAGTCAGTCGCATCAATCAAGAAATTACACTTCGTGCATCCTACGGTGTGTTGTTGATACAAGGGACAAAATTCTTTGCGAAA
>Locus_50799_116
CAAAACTTCGTTTGTGTGTATGTAATAGACATTTTTGGAGCAATTTATATCAAAGTTTGACAAAAATTTAGTCATCTTGATATAATAGCTTTGGGACAGTTGTGCTTACTTACAAG
>Locus_50798_86
CCTGTTTGAGGTCCGTTGTTATATGCCGACAACTCCGATCCAAACTACCCGCAAATTCCAGTACAGCCAGATCCAAAAGATCGGAA
>Locus_50797_73
CTAGAACGTTCACGGAGGAATGCAGCTTTCACCTGATTGGGGTACACACACACAGCTCCGGTGGATATTCCTG
>Locus_50796_107
TACGGGTGCAAGTCCAGGCAGACAACGGTAACGGTACCTATGATGTGCAATATGATGCGAATGAGCCTGGCAACTACACAATCACTGCTACTTTGGATGGTGATGCT
>Locus_50795_78
TGTCTGACTGCACTGACTCGTCCCCTTGTTGTTTAACACGGTAATGTTGTCAACGATTGCTGGAGTGAACTCCAGTGA
>Locus_50794_71
CTGAAAATCTCTAATTTTCATCTGGTCGAAAGCATAGTTATGAGAGTAAGTACAGACAAAAGAAAGTACGA
>Locus_50793_92
CAACTGGGCTCGCTCCCAGTCTCGTCATATTCGGTTGCACGTACTTATAGATTGCTTACATCGCATGGTCCCACCACGAAGAGAATTATATA
>Locus_50792_110
TTGATTTAACGAGTTCTCAACTTTGACTGCAGGGAGTATAGCACATTCATTGTTGTGGTTCTGTTGCTGGTAGTGGTCCGCGAACCTGTTCAGCATGGTGCTGACAGCTT
>Locus_50791_72
GATGGGGTGTCGCATCTGAAAAGATACACCTCCAATAAAACAAGAACACAAAGTTGACATGAAGATGCAAGC
>Locus_50790_182
AAGTATTAAGTTCATCTCTCCCAAGTTCTTGTGCAGGTTGTGGAAGAGAGTGAAGTCAGTCTTCAGGTTTCCATCCAGCTCAACCTCAGTTTGGACATTTCCTTGCTTGAGTCTCAGCTCGGTGAACAAAGTGGGGGTTCTCAGCAGACCCTTATTCTGGACGCTCAAGTCAGCAGTCAGTT
>Locus_50789_82
GCAGTAATCTAGTATAGAGTGCTACGTCACGACCCCCAGACTCTTGCTGCATAGTCTTTTCCGACTGGAACGGTCTATATGA
>Locus_50788_113
TCCGAAACCTGTTCGAGTCGAAGAAGCACATGGAGCACATCCGTGTCTACGGTGAGGGTAACGAACGCCGCTTGACCGGTCGCCATCAGACTGCCCCGATGGACAAGTTCTCT
>Locus_50787_89
AAATAAACGGAAAAGCAAGACGATGAGCAACAGTCGATAATTGACAGTGTGTGGTCCTTCCAAGAACACAGGCTGCCTACAAGTACAAG
>Locus_50786_189
TTCATTTTTTAATGTAATATAGTTATATTGGATCAATGGAGTGAAACCTTATTTCTAATGGTCAAGTCCGCTCTGTTCTGCAGTAGTGTAACTATAGTGTCGATGTCGTGTGGGAAAACGCCAAACAGGACCGCCAGGTGCAGTGCAGTGTTGCGCTCGGCCGCCGTCTGTGCGTTGATGTTGGCGCCA
>Locus_50785_103
CCAGTTTGTCACGACTTGATCTACCTACCCGCAGGAAGGTGGTATGATTATTTTACTCATGCTGGAGAAGATATCCAAATAGGTGCAAACAAACAAGTGGCGG
>Locus_50784_116
TAAATTATAGAGAGAGAAAACCAGGTTCTTGGTTGCATCAGAGATGGCAGACTGTCGAACGGACGAGGTGTTGTCTTTGACAATTTTTACTTCACCCACTTACGCGATGCGTGGCT
>Locus_50783_101
GCCGTCTAGTCATTGTCTCATCCTTTAACTGAAGTACCTTACATCATGAGGGCCATGGGGTTTTATCCCTCAGAGCAAGAGATTGAAGACATGCTGAATGA
>Locus_50782_87
TCTAGAAAACCCTGTCGTCCAACAACATGATATTCAACAGGTTTGTGACAGACTTTTCCACATCCATTAGGACAACACTTGTGCATC
>Locus_50781_84
TTTGATGCATATCAACCTTACATTGTCTTATTTGCTTGGTGCTAATGACAGAAAACAAAACAAACAGCTTCCAAAGATCGGAAG
>Locus_50780_115
GGTCGTAAGTTCAAGGGCGAATCGCTAATAATTTGCTAAGCACGATGGAAGACTGGGATGAGGTGTCAGACGTTATTTCAAGCAGCTCCACGGTATCAGGAAATACCAGGTTACC
>Locus_50779_96
AGTTCTTAGTTGGTAGCCACCAGCATTTCTCACGCAAACTGTCTCCGTTGATGACACAACTGTTAAACTCGAATTATGGGATACTGCTGGTCAAGA
>Locus_50778_87
AAAAATTTATATGTACATCATGTGAGAAGGAGGGAAGTGGTGAATCATCCTTTTTAGTCCGATCTTACCAGCACCCATGAAGAGACG
>Locus_50777_80
CCATTACTGTATCCTTTACCAGCTTTGGAAGTTACAGTCCTGTCTGCCAGCCGGCTGCCATTTGTGAGGTCGGGAGAGCG
>Locus_50776_101
CCATTAGAAAGGGTAGGTGCCACTCGAGGACTCAACAACATGGCCGAACAAAAGGAGAACCCCATGACCGCTCTCAAGGTCGAGAAGCTCGTCCTTAACAT
>Locus_50775_78
TGCAAGTACTCGGAGAACAAGATAGCCACCTCCATTCGATGGTACTTGTTACCCAGAATCACGAAATAGCGACTCACA
>Locus_50774_123
ATCGTCAAAGGAATCACAGGCACTTTTCCAAATATCAGATTGCAATTACTGGCATTTTTTAAGCGAGCAAAACCCATGATAGGATATGCATGGAAATTATATTTATAAAAACACCAAGTATGT
>Locus_50773_96
TGACAATAAAGAATAGTTGGGGTTAAGGGAGTGGTGCACATGCTTGTTGAATCAAGGAATCATGCAGATCATAATAGTTGTCAGATTTGAAGACAT
>Locus_50772_290
TGTTGAATGGTTCTCTTAAACATGACAAATTTTGTTGAAGAACAATTCACAGTAATTTCACCACGTTATCAACATAAATTATCGTGTATCTTCCATCGAAAAACTTCGCCCTATGTCGATGAACACCAGCGCGAACATGTTGTGATTATCTGTCATGGTTATTAATCGAATAAGAACGCCGTTTTTCTTCCTCAATTAGCACGTGATCTATCCGATTCAGCAACAAATCAATATCATTCGGTACGTTTTGATTTTCATGGATGTGGTGAATCAACCGGCCGCGAAGAATG
>Locus_50771_85
CGACAACTCTGTTGGGAGGTAGCATTTGCCTGTGATCCTGTTACAAGATGAGTTAATACAGTTTGCACTGCAGGAAAAAAAAAAA
>Locus_50770_72
GCCCTAACTTTGCTCTCCAAAATAAGTTGTAGAAGAAGGTGGCCCATCAGAAGTTCGTGGGAATGCTGGCTT
>Locus_50769_77
CAGGTGAGTTGGGGAAGGGTCACTATCCAGATCCCTGTCATTAATACTACTGGACTTGTCCACTCAACCCCTTCCCA
>Locus_50768_72
GACAGTAACTTACAATGTGAAATCGTTGCTTGGCATAATGTTTGCTGTAACAGAAGGGCTCACCTCTGTCAT
>Locus_50767_115
AACCTTGTCATCAATCAATCACATATGCAGGGCTGACTTGGGCACCAGCAGCAGGAACGAAGATGGCATTGTCGTTAAATAAGCCAGATTCTGGAAGAGCAAAAGCATCACCAAA
>Locus_50766_85
AATAAATTTTACCAAAATCATAATTCCCGAAACAAACTCAAGAGGCATTTATTTCAAAATTATAAGTATCATAGATATTAGAATT
>Locus_50765_109
TGTTCTGTTACTGGAACTAGTGAGCTTTGGTAAACAGACTTGAGGGCAAAAACTGTCATCATTTCCCACTCATCACCATCTGGCAGACACATTAGTCGATAAAAAATCT
>Locus_50764_261
GCTACAAAGGTCGATGTTAACTCATCATGAAGACTCCATCAGTCCTCAGGTAGTTGGAGACAAATCTTTTGAATACCTTTGTCTCATTTTTTGTGTTGATGTTTAGAAGAGTGAGGTATTTTGAAAGAAAGTTTTCCCCTGTGTGAGGGACCAGGGCTTTGAGCAACCAATGGAAGAGGTTGACGCAGTTGAAAATGAGCAGCATGACCAGCCAGAACCAGAAGATCAGGTACATCTTCTCTAAGAAAAGATTGATGTTAC
>Locus_50763_218
GTTGGTTAGGATCAATTTACAAAAAGGACACTCAATTGGATGTTTTTCAAAGCTGAACAAAGGGTAGTCAGCATTGATTATATAATTTTTTTTATTGGTACAAGGGACTCTAACTGAAAAGAAACTACTAAATAAGAGGTAAAAATCATTTTTACATCAGAAAACAATACGTTTTTCTACAAATACATCACACACAGTGCACTATCATATAATATAAA
>Locus_50762_93
GTTTTAATGTGGTACTTGCATGTTTGGCTGCGTATTTTTAGGATTACCTAAGCCCATTAAAATAAATTATTTACAGAGTCTGAGATCGGAAGA
>Locus_50761_174
TCATAGCTTCTCTCAAAAGAGACCTTTATGTGAGACTTCTACTACAGAGGTTTCCCTCTCTGGGTATTTTCGATAAGGAAGGTAAATGCCTCGCTTTTGAACTCAGCACGGAATTCGGAACGATGGGTCTTCTTTATGTCACACCGGAAGCGAGAGGTCAAGGTTTATCGAAAG
>Locus_50760_76
GCATGTGGCCGCCGGTGCTTCAAGCGGGGGTGTCTCTTGGATCTTTACTGAAAGCAAGAGACGCTGTGGACGAACC
>Locus_50759_121
CCGTTGTATGTAGTAAAAACAGCATCTGAAACCTGTGACCAAATATCTCCAAGTGTATGGACAGTGGGCAGTTAAACTAAAGGAGGCTGTACGGAATGTTCCCATGGACGAAAACAGTTTT
>Locus_50758_72
ATTTGGACTGGACACATGGAAGCCACTCTGACAACTATTTTGCAGACTATAATAGGAAGACTTTGTTAGCTG
>Locus_50757_72
GTGCACAAATTCACTTTCCGAAAAGACATCTACAAAAGACAAGGAACTCAAACCACACACATTGGAATACGT
>Locus_50756_77
GTGTGTATCCAAGACGGGCCGGTGGCACATACCCACGCAAAGCCACTGATATCATTTATCTATATGCTATTTTCGTG
>Locus_50755_71
AATTTGACCTTTATGAATCAAGTGATAGAAAGAATAAAATCTTCCACTATAACTTAGCGGCATCGTCTGTA
>Locus_50754_88
CCTTTCACCCAGTAAAAAATACTTTTTGTTTTTCAGCGGGCTTGACCAAGAGATGGCGACCGACAGAAAGACAAGACCGTGAAGTTTA
>Locus_50753_72
GCGAAGTTATTCAAGATACGTTTAAATTGTTATTATGTTATCAGACTATTTTGCAAATTGGTCAAGGCGCAA
>Locus_50752_83
AGAGACTTCAACATGTTCAGTTTTAATGACTCTATAGAGGTGAGTTCTCCAACAAAGTTAACTGTGAGATCCAGATCGGAAGA
>Locus_50751_82
GACGAGCAAATGCAAACGAATGATGGGCTGGCATTGTTGCTGGTTAATATTCGAATTGAATTCTTATTTTTGTATTATTGAA
>Locus_50750_97
GGAAGTGTCTTATTGTACACCGTCGTAGTCTAGTGGTTATCACGCCCACCTTACACTCGGAAGTGCTTGGTTCAAATCCCGATCCATAATATTATTT
>Locus_50749_81
ATTAGGGATGGTTCGAGTAACTGTTGTTGGTTCAGTTGGACGACCCGTTGCCTATCATAACATGATGGATAATAATCCCAG
>Locus_50748_80
AGTCGTGGAAAGATTTCTGTTCTCCATTTCCAACAGTCTTGTATTCGGTCATCGAAGTGCTGACGACACCAGGGTTAACA
>Locus_50747_106
AGAAACGCCTGGCGTTTCAATTTCCCGTGTTCCTCCATTTATTGGTCAGTATTGGATTCCGCGCCACCACGCTCGAGGATCACGTGATCGACACGCTTCACATTGT
>Locus_50746_196
GGAGCTGCGACAATATTAAGGTATCAAATGCAACATCACCGCTGGTGTTAGGTATAGCAAAAAATTGTTTATGCTATCTTTTGTACATTCCGAGTTTGAGCATAGCAACACTCAGCAAATGATGATTGTTCACGGTAATACATCGTGTGGAGTAAGACAATCAAGAAATCGAGCTAAGAGTTCACGTCGCGGCAGA
>Locus_50745_154
GAAGACTACTCCACAGTGAATGTGATGCTGTTGGAAAGGCACTTGAATTCGTCACCTTCCTGGATAGAGCATTCAGATCAGGAAATTTTGGAATGAAGTTTGATCTGGGGCCCTTGGAATAAGCTTTAGTATCAACAGTGGAGGCTGATGAGCT
>Locus_50744_123
GTATAACAATCGATAGCTCCTTGTAAGAATGCGGTCTACTTGATAATAAGTTGCTTAGATTTTCTGCTGAACATTTTCATCAACTTGGAATATTCAATAATCCAGGCCAAAGATGATGCAGAC
>Locus_50743_114
GTGTGTGTGAGTGTGTGTGAAGGGGGCAGAACATGCATCATAACTCACAAATAATCAATCTAACTATTGATATCATAGTTATAGTTTTCTAACACACATAAATCTATTATAAAA
>Locus_50742_74
TTCTGCGGGCGCCGTCGGTCCAGTCGGATTAGTTCGAAGAGCTTCGTGCGAATTTCAGTGTCGGTGAGCATAGC
>Locus_50741_164
GAGAAGGCTAGACGATTTAGGGTGTAGGTGTAGAAAAGGTAGATTTTGCTTAATATTTTTTCAAGATATTTACACATATCCCATAATTTTAGTTGTTCCTCTAACCAGAAATAGCTGTATAAATTATTGCAGCTTTACAAAAGAGGTCTATTAACAATTGATTT
>Locus_50740_72
AACAGTTATAGAGGTTCAACAAAAGAGGGTCTTAACATATCATTAACACAAACGTGTGACGTTGCTACAAAA
>Locus_50739_93
TTTTTTTTGTTTTTTTGAAGAAACCATGGGAATCTTTCCTGGAGCATCAGTTTGTCGAGGACATGACTGGAAATGGGAGAGTCAAGACGGCGG
>Locus_50738_99
GTTTCAGGTCAGGTTTGAGTATTCAAGGTCACAATCAATTAGAGTAGAAGAAACCGACTCCTGGCCACTGCCCAATTCTGCAAGGGTGGGCACGCTGTC
>Locus_50737_83
GACGGTTCGACGCAAAGAGATTGCATAACAATAAAATCATAAGTCGAGATGTTCTTGAGTATAAGCCAAACATGAAACTGTGT
>Locus_50736_72
ATCACCACTGTAGTTGTAACAATACATGTGACAAATACAGGACAAATGGAAACTGCCGATGACGGTGGATGC
>Locus_50735_97
GGGATTATTTACCGTTTGTTAATTACGAGCACCAATCGAACATTGTATCTTTTTCCGCCTATAAGAGAAAACACAGCAGACAGAACAGAGCAACGTA
>Locus_50734_79
CAGTGGCAAGAGTATTTTGTAACAGACGATGTGAAGAAAGTAAAAATAGAAAAGAACTACGTCTTTCAATCTGTCCAGC
>Locus_50733_128
AGGCTAGAGAGCTTAAAGTAGCATCATGCCACAATGTCGAAGAATGGTAAGAATATTTCTTGTACTGCTATCTAACTTGAGGTTTGTAAATTCTGTTATGTCTTTCTCTACAATGAAATGGACTCCTT
>Locus_50732_122
CTCCCCCAACCCAATCACCGGGCTGAACCCACTGGCTCTGCCCCTGGTGTTGACGCCCTTGTGGCCGCCAGCGTGGAACATGTCGTCAGAGGCGTAGTCGCGATGGTGCCATGGGTGGGGCT
>Locus_50731_79
TTGTACTGGAGGTGTAAAGTAACACACACGAATAACAAATCATGAAAATAAAGCCTTGACAAGAAGCAATACCGGCTCT
>Locus_50730_77
AGTTGTTGTTTTTAAGATTTTACATTCAAAAAAAACAGCATGAACGCAAATCTCATATGCCTCCCGACCTTAGCCCT
>Locus_50729_238
CTCGTCATCTCAGGTCAATCAACCGGCGCATATGCTAAGCTTTTCGGTCGAAACTTTGGATTTACTATTGTGCTATTAAACCAATGATCTAATTGATTATCGACGTTGAAAAGCGAACGAGTTATTGATCCGCCAACCCAAGGGAGAGCAGTGAAAGCTGCCGCGTTTAATATCGACGACATTGAAACAACGGTAGTTGATGAATCGGTACGATAGTTTTTTTTTTTGTTCGTTAGTT
>Locus_50728_79
GAGACAGCAGTGGTTTAAAAAATAGAGTGGCACAAGATAACAATAACCAAAATACTGCATCTGTTGTTACTGTCTCAGC
>Locus_50727_82
CGCTGGTGCTGCGGGACTCTTGTTTGTTGTCTGCTGGCGCCAGCATTGATGGAGAGGTGGTCGTGCTGGTCAGATGTAGCGG
>Locus_50726_123
TTTCTTTTCTTGTTTGTTTTGACCCAGTCGTCGACCTACATCAGGTTTGATCCAATCTTTGAGAGTGGAGAAGATCTGCGGGCATCAAGTGAATCACTGCGTCCTCCCTCCATTGTCTCAATC
>Locus_50725_86
AGGAACTTTAATGTTTTTATATATCATGAACTCAATATTTCTCTTGATGTCCAGAACAACAGCCATTACTTTGTAATGCAGTGATT
>Locus_50724_71
GCCTCTAGTTCGGTGACCAACACTGACAAAACGGACTCCGACATAATGGCCCCGACAAAACGGCCCTGGAC
>Locus_50723_98
GGGTAGAGTAGAACAATAGAACTAAGTCATACAATTAGTCCACTGATTAGAACATGTAATAGGTTGGACTTNNNNNNNNNNNNNNNNNNNNNNNNGTG
>Locus_50722_86
GGGTGGCTCAAACTGCAGAATTTTAGGTCATCGTTCTCTGTCTATTCTGGTCATCCTTTTTGTTTTATAATGCGTCAAGAATTAGG
>Locus_50721_229
TACTTGTAAGCAGACAGCACAAGGTTGGCTTAGGCAACAGTAACAGATTTCGCTAAATTTCGTGGACAATCAACGTCATAACCACGGAGAACAGCGATGTGAAATGAAAGCAATTGCATGGGCACAACGCAGAGAATACCTTGAAGACAATCGACTGTACGTGGAATAGGTATGTGTCGTTTGGCTAATTTGATCAATTCTTCATCATCATCATTGCAAATCAATACGG
>Locus_50720_132
GCAACTTCGAGAGTGCTGTTCAGCTGATCAACTCATCCAATGACACCTCGTGGGTACATTTATTGGTTTGTTGGCTACTTTGTCATGCTAGACTCAAATTCTCTTTTATCTGGCCTAAGATTTACATTACCC
>Locus_50719_74
TCTTCCGAGTATCCTCCTTCTCAACTGTTTCTGTTAGTATTATATTTCTTAAGTTTGTTTTCAGTAGATTTAGG
>Locus_50718_79
AGGGTCTAGAGGAACAGGGCATTTTCAAGATAGCTGTAGAACAGAGCAGTAATCCAAACGGCCCAGAGCTCAAGACCGT
>Locus_50717_134
CACCACAGGGAACACTAACAAATATAACTCGAGAGTTGAATTATGGGAACACTCCAGCAACCACCAGGTGCCTATATGACGTGATTATCAAATTAAATACTCTCTCTAAAATGTAAAAGAAGAGATCGGAAGAG
>Locus_50716_101
AGGAGAAGGTGCTTTTGTTTAATCCACACAGTTGTCAAAATAATGCTACGCTTTTATATAAGGGAACAAAATTGGCTTCCTTGTAGAGTAGTCTGTAATTG
>Locus_50715_269
TACGACAGGGACCTTTAGTAGGGGTTTGCCAAAAAATATCCTGATATCAAGTTGGAGCAACTCATCAATTTGATTTTATGTCGTGGTGACATCAGCCGATCTGATGCCCGTCAGTTGGCTATTGACACACTGGGTGAAGACGACTCAAACAAACCTAGAGGAATCTTCTCTGAAATAGCCGGCTCTGGATAACCAACTACAGACACGTGATTCTCATGAACTCTGGTTCAAATTGATGGGGAAATCCCAATATGTGCTGTTCACACCTC
>Locus_50714_72
ATAGTGGTACTTCTTGGACGAATACATGGCCCTAATAAATGACAAATTGAAATTCTCAATGGCCGCCAATTC
>Locus_50713_183
AAAACATTACGGGTAAAAGATTTAGGTCTCTCTCAATCTACTGATGAAGCTCTCTCTTCAGTAGCAAAAGGTTTTGGCAAGCTTGGTAGGGATCTTGATACTCAATTTTCCAGATTTGCTAATTCCGATGAATGTAGTGTATTTCGTATTATTAGAACTGCTGCGGAGGTGCTTGGTCCACGT
>Locus_50712_97
GTACAAGTATCCGCATAGACAAAAAATTATAATGAACAGCTTAAGAATGTCTTTACTTCAAGTCACTACATTCCACATTGCACTGAGGTGTTGTTGA
>Locus_50711_75
GCAATAGTTCTTACGACTTTAGACTGAGGAAATACAGCAAGAAGCTAAAGATTGTACCACCCAAGACTTAGAAAA
>Locus_50710_78
CTTAGTGCAGAGCAGTAGTTTTTATATTAATTATATTTTTAGTAACTATTTTTAGCATTAATAAGTTTAAATCAGCAT
>Locus_50709_76
AAGACCGTAAGTAGCAGTTGAGATCTCTGTAATAAATTATAAAACGAAAGCCCACACAAGCAGAGATAACGGAGAG
>Locus_50708_85
ACTGGTCCCACATCTCATATAAAAGAGCAAAATAATTACAAGAGATGTCCAGCCCCGGGCAAAGAGAGAGGAGAGTGTCCACCGC
>Locus_50707_435
AAAGTATGATCTATTAGTAGAGTGCAAGAATACTTCGGTCAGAGGATAGTACCAAGTCTCTTCCTCATCAACCGCCTAATTATCGGGTCTTGAAGGCAGCGATTCCAGTGAGTTCTCTGCCGGCGACCATGAGGTTGATGTCGTACGTTCCTTCGTAGGTGAAAAGAACCTCAGCGTCGACCAGCACCTTCATGACGTGGTTGTCAGCGATGATACCGTTGCCTCCCAGAGCTTCACGGCCGAAGCGCACAGCTTCTCGCAACATCTCTGTCGCGAATGCCTTACACATCGCGATCTGGCCGATTGTGGCCTTGCCTGCCAGGTGCAACTGCTGGATGTTGTAGCAGAAGAAGAGGTTCGCCTGCACTCTGCTCATCACCTTGAAGATCTTCTCCTGGATCAACTGGTAGGAAACAAGTGGATTGCAAAAAAAAA
>Locus_50706_93
AGGAGGAAAAAGAAATAGGATTTATGTTTCTGTTAAGCTGCCAACAGACTTTGTCCATGTTCCCAAGATTACAGTGTTCCTCCCCACACTGGC
>Locus_50705_135
GACCAACAGTATGTGTAGATCCCGGGTCAAGTGGAACAGGAAGTTCATGTTTGACATTTATTAGTCTTAGCATTGTTTATTGAAGTGTTGTTGCTTGTGTAATGGTTCAACAACAAAGCCCTTTGACATTGCTGA
>Locus_50704_90
GTAGACAACGTCCATAAGTAAGAAAACTATGATTATCACATGAATAGCTTCATTGTAGTATTTAATTATAATAAATATTCTCCCCGAGTA
>Locus_50703_72
GGTGTGTCGACAAAATTCAACATGTTAAATTTTGTGCTCTACATCTTCGAAGGTGAAATTCGCCTCATCCTT
>Locus_50702_80
CCAAGCGGTAGTGACAAGATTACTCGGTGTTCCCCGTGGACAGAAATAAAATCCGCATGTTACTTGAGCTAAATCAAAAA
>Locus_50701_85
AACCCACTAGGACTCAGTTGCAATGTAAATAGAGTGCAGTATGGCATTGCAATGGCCCACAGAATGATGGGCAAGTTTGCCAATC
>Locus_50700_90
CTGCATTATGATTTACGTCTATAAAATCATTATGAATATTGTAATATGACAATGTACGACCATCATCAAATTGTTTATCAGCAAAGATTA
>Locus_50699_94
CGACCTACAACTACCGAAGATGCTTGTTACTGGTTTGATTGGTGATGAACCTGGTTGAGGATTCTTACCACTGCTTGCTGTGGTATTTTCTTTT
>Locus_50698_87
CTTAAAAAAAGGGACAGGGATTGAGTTCAACTTAGAGAGGTCCCACTGTATTATGCTTCATCTTTTTATGCTGCGATCTGAGGAGCA
>Locus_50697_77
AAGGCTAGAGTAATAACCATTTCCAACCTCCACCCAAATTGTTATTATTCCATGCACGACCAAGAGTGTTCAAATTC
>Locus_50696_72
AGTTCCCCGGTATAGATATCATCAAAAATACAAATGAATCGTATCAGTATTAACGCTTGAGGATGGGGAAGA
>Locus_50695_111
CCCATTATCGACAAATCCATGCAACGCATCGATTCACAGTGGTGTCGTATTTTTCTGCTTCTGCTGGTCTCTGAAAAGTAAAATAATCATGGCAACAGAAGTCAGACAAGT
>Locus_50694_118
TTGTCCCATTATAAACTAGTTCATGTTGTCTTATCGAAGTCTGTTTTCGACGATAATTTTCTCATTGTTTCTGGCGATTGTTATCGCTAAAAAAGTTCAACCTGATATTTGTGGATGG
>Locus_50693_86
GGTCACTGATCTGTAGGTTTAAAAGATAACAAAGAAGTTAAGAGTAGACAATTGCCACAGGAAAACAAACGCGATGTGTCATCTCC
>Locus_50692_90
ACGTGACGTGTTCAACTACCCTTAGGGGCATTGTCCAGCTTGACCTCCTCTGTGCTAAACATGGTGATTTCACTAAAGATGTCGCGCTCT
>Locus_50691_151
TCTTCGACTTTTTTTCTTCTGCAATGAGAGACAATAAGAATGACGGCATGCGTTACAGTTATGGATATCCTTTATCATAAGGCATACAAAATACTGCTCAACTAATTGGATTTTGGTATTTTTAAAAAGAATCTCATTAAACACAGATATA
>Locus_50690_125
TGGTGTCTTTACAAAGGTCAAGCCATCAATGTAGTATTGAAGTGATGCCATGTAGGGGTGTGAGAATTCCGCTGCTTTAGAGCCGCCTATGGCACCTTTATTTGTTCTCGTATTGTCTGATCGAA
>Locus_50689_86
GGATGGAACCTTTCCAGAACTTCAGTTATAATGTTCAGTATCAATAGTAAATGAAATAAATTAGTACATTTGTGGCTTTAAAAACA
>Locus_50688_77
CAACATCGGCATCGACATACTAGGCGGAGGTATTTGTGAATTGAACAATGTAAAATTTCCATTTCAAAGTCAAGGTT
>Locus_50687_126
AAAAAAAATAACAATAGCAGTGCAAGTGAGTCCCCAATGCGTGTTCACGGCAAGTGTCTTTGTCTCACAGCCTGACGTTAATGACACCGTTAGATGTTGTAATGACGTCATTGGCATGTGTCTTGC
>Locus_50686_126
GAAGGCTAGACGTTGACATCGTCCGACCCCAATAATCAGAATGTATGGCATTACAATGGAGGGTAACAGTGTTATGGCACATATTCATGGCTTCACACCGTACTTCTATGTCCCAGCACAGAATGG
>Locus_50685_84
ACCCCTAGCTCGCGATACAACAGCAAACTTTTGAGCTAAAAATCCACCCAATGAAGCTCCAAATATATGTACTTTGTCTAGAAC
>Locus_50684_267
CCTTGAACTACGACAACAGCAGGAATTGCTTGACGTGGACACGGCGGACTTGAGAGCCATGGATGGGCTTGATGTCGACGATCTGGATGGTGGTGTGACGAGCGCGGTGACGACCAGCCATATCGTTGTAGAGTTGTTGGACGGCGCCGACGCGGGTAACATCGCGGAACTCTTTGTACATGTTGTGGACTCCCTTACGAGAGGTGTAGCGAAGCCAGACTCCGTAGTTCTTGACGGAGGTGGATTGCTCCTTGATCTCATGGACGG
>Locus_50683_74
TTTATTTTAGTTTTTGTTTCAACAAACTTGTAGTATATTAACACAAGCAAAAAACAGAATGACATGTATTTTCA
>Locus_50682_114
GTTTTCAGACTTACTCCACTTGGAAGTTAGATATTAGCCTGAGAAGGAGAATAGAGTGGCCGCGACGAGCACGAGCAGAACTGACATGCTTCTCAGAATGCCGGCGTGCGATGG
>Locus_50681_96
GGGGGGAGGGCTAGAGCTGTCCGTGTTCTTCCGTACAAAATAATCGACTACATCAGGGTAGCGATACTTTTTACTGGTTTTAAAATACTCCTGAGA
>Locus_50680_157
TAAATGACGACCTAAGGCTAGAATCGACGACAACTGGTTTATCCTTTGCATTGATTAAGTTTGGTTGTGAACTATCGAGTTGTTTATCGATAGGTGCGGAGTATGATGCTACCGCTAATAATACGAGGACAAATGAAATAACAGACGTTTTAGCAAT
>Locus_50679_77
GCAGAATCGATAAATTTTGTACTATATGTTGAGTCTAGCACAAACTTGTGTTGAAAGAATAAATGTCGTTTTCTGTT
>Locus_50678_73
GCTTTGTTTTGTTGAATGTATACAACGTATTATATTTTCACATTCTATTGTCTATCATATTTATTATTTAACT
>Locus_50677_73
AACTGGTTCAGACAGATCTTTTAGAATGCCATTTGCAGCATGAGCGATTTACATTACTAGGCTTAGTATTATG
>Locus_50676_132
GTTTTCGATTAGGATCAACAGGGACCAGTTGTGTCAGTCATTTATTGCAGTCTAGTAGCAGCTAATTCAGGCTGTCAGAGCCCTGCAACATTTATTGGTTGCCTCAATGTTTTGACAAGTGTGACATGTCTC
>Locus_50675_120
TTTGGTCGTCGATCTGGCGACAAACCGACCGATAATCCGGCGCCCAACTGGAGGAAGGCCTTGTATAGACCGTAGTTCTCCGTTGCGATATTGTTGGCGATCAGTACGGCGACGACCAAA
>Locus_50674_91
AGTTGGTATGACTTCCTTATTGAGTTCTCAGATGCTTAAGGCCAAACATACTGTTTAAAAATAGCATAGCTACACAAAAAAACATTCATAA
>Locus_50673_114
TCCTCGACCCCGACCTCGTCTTGCAGGAGCCGTAGATGCCATTTTGGGAAAAAAAAAGTAAACACAAGCAAATAGACTCCTTAGGTGAAGAGAAGAAGGGAAGATTACCCTGTT
>Locus_50672_65
GAACATGGTGAGCAATTTGGATTCCTAATATGTTCTTCATGTCTCTTTTGTTTGGAGTACAGGAT
>Locus_50671_128
CGAGCACGTCGAAAGCGTTACGATTACCTATGTCTCTCTTTTCTCACTTTCTTCCCTACGCCCCCTCCCCCACCCGCGCTCCGCTTTGTGCTTCTATCTGAAGCCCTTACTGCTAGCCAGCCGCGACG
>Locus_50670_92
GCTTCAGTTTACACATTTCAGGAAGTGAAATAATAGTTTGTCCTCCTAAGTTTTGTTAACAAAACTATAATGGAGGCCGATTTTGATCCAGA
>Locus_50669_306
GAAGCTGTTTAATAAGTTGCTTAACTTTGGGCAAGTCAAACAGGCGCTGAGCGCAAAGGGCTTGAACGCATCGATTGCGGATGAAATCTATCGGCTCATTTCAAGCGCTTCCATTCTGTTCTACTTTCTGTATCACAGTCAGAAAACGAAATTTCCGGTGGACATGGACACCATCAAACAGTTCGTCGCCACAACACGTAAGGAATTGGAAGGCTTGTCGTTGAAAGACGATCCGATCATGCAAACGTATATCGACAAAGGTGAACTGGCCGTGAAGTTCGTCATTGACACACGTGAAAAGCACGC
>Locus_50668_79
CATGAAACAATTGTTCCGGTACCCACATTCTCAACGCACCAGAAACAATTTGCCGTCATGTCGTCAACCTATAAATTAA
>Locus_50667_98
GTTTATACTGTCACTGTTTTATTCAAATATCAATAAGATGTAAATTGTTAAAAATGGTCAATATTAATAATAAGAAAAGTTGGTTTGTGATGTTGTAA
>Locus_50666_74
ATTTCCCTTGTAACCAGGACGCCCAATAGTTGCTCCTGTGTAGGAAGAATGAAAAGTCCTGAAATTGTAGGTCA
>Locus_50665_74
TGTCGATAGTACTCTACAAAATACTACTGCCTTGCCATTTTCATAATATGTATACACAAATTAATTTTGAACCT
>Locus_50664_154
ACATGGCACACGTCTGAACACATTGGCAATCATTCATCCTTCAACCTCATTTTGAGATAATTACCGTTGCTTTGTTCTCGTTGTTTCATTTATAAAAGGAGGCCGTGTGCAAAAGGCATTTAGCTATGGGTTAAAATTAATTATGAGTCAAAGT
>Locus_50663_115
TAGACTTACAAAAGTTAAACCTGCATGTCTAATCAGTTAAATCAGCTACATTACTTGAGTACATCAGCAATGAATTGCTTCAAATAAACTGTCATCATACCATTAAAAAAAAAAA
>Locus_50662_85
CACGACTTACCCTTATACAGAACTTTCACTGAAGCTGATAGGGGGGTTTGGCAGTGAGACTCAAGTATGTAGCACTCACTGTTGG
>Locus_50661_91
CCGAGTACCACTACAGAGTACCACTGCACAGCAAACATATCCCAGAATTATATTTCTATCTACGCTGCACAGGCTCATGGTGATGTCTCAT
>Locus_50660_81
TGTCTGTCGTGGTTGTTCAATACCACCGATGTTTGGGATAAAATCCAGAAGGAACTCAAATGTTGTGGTGTAAGCGGTAAC
>Locus_50659_74
CTTTGTTGCACGACAAGCCAAAATCGAACGATCTTTGATCGGCATAGCTACAGTATTTCTTTTGATTTTCAGTG
>Locus_50658_78
CCGTAAGTGGAACTACGGACGGCCATTTTGTGGTACATTGTCTACTTAATGAGGGGAGCTGTGCTGTTTGTTACGGTG
>Locus_50657_120
TGTTATTGAGTTTGCCATGTTTCAGACGAACATTTGTCTACCTGTGGCTAAACACGCGATGATGCAGTAGCAGACCACGTTCATAATTCCACAGAAGCGTAGAGTTTTTGCCATTCCAGA
>Locus_50656_81
AGTATGTAGTGGTTCCTTACTCTCATAGAGCTGTACTGTAGTCACCACTGTCTAACCCAGATCATACATCACCAAGGAATG
>Locus_50655_89
AAACAAAAAACTTTTTTTTTTAAGAGCTTTACTTGAGCTTCTTCTTGATGCGGAGATCAGAAGAGTGACCGCACTTTCTCTTACGGCAG
>Locus_50654_75
TGTATGTTAAACTGTACAGTAACATACCTTCTCAACAGAGAAATAATGGAAACCTGCGAGGGGCCGGGAACATGG
>Locus_50653_74
GGTATTTACTGCAGTGCGTTTTTTGGTCAATTGTTACCCTCCTCCCCTCTCGTCACCACACTACGTCACAAAAA
>Locus_50652_92
TGCTAGCGAGTTCCACCACACCTGCCCAATATTCAAAGCATGTTGTTGCCGAAGAAGGGAGACGGTGCTGGTGCATCTGCATCGGAAGGCGG
>Locus_50651_77
ACTGACTAATCTGAATCTGTCACCTAAAATTAACCCCGGGTACTATGCTGATACAGACGGATGGAAGTTACGGTTAA
>Locus_50650_87
GTAATTGGGACACCAAGGTGTAGTTACAGTAGCCTGTGTAATCAAGGCCGTGGAATTGTTAGTGCCTTTGACATTGAGTGGAAGGTA
>Locus_50649_131
GTAGTTCCGGACCGAGTTCCCCAACGTGCAGCTGTGAGTGCACGTGCCACCTGTGCGAGACTTGGCAAACAAAGCTCCGTAAAGTGCGTGATAAGAACCTGAACCTGAAATCAAAAAACGCAGTGGTTGCG
>Locus_50648_71
ACCGAAAAGTGTAAAACTCTACCAATGATAACAAGGACGGGGGATAACAAAAGACCTGGCCCCATTGGCCG
>Locus_50647_71
AATAGTCCAGTCTAGACATTCAAAACACTCAAACATAGCACTAAAATAAATCATCTATTTACTTCTACTTG
>Locus_50646_94
AAAACTATATTTGCTAGAAGCAGTGTTTTGCTTCGAGAAGCCGGACGTGGAGTACGGATGCAGCTTTGAGACCTTTCGACATTTCTGAGATCGG
>Locus_50645_131
AAAGGGCGGTCTACCCTCATCGGAGTACGGCCACAGTGCACAGTATGGTACCTGCCATCACGCACGACGGGTAGCTCCGAGTTTGAAAGTATTCATCATGTGACCAGGGCCAGCCTAAGGGAATTGGATGT
>Locus_50644_275
TCTGTCCGAAGAGTTGAATCAAAAACTGATGTTGTGGAATTAATAATTTCACGTGGTTGCAATGCACGTGAGATTGTTGAGTGTGGAAGAGTCAACCAACTAACAGCCTTGAATCATCCACCAATTGATGCCAGTGAACTTGTTACAGTACTAGAGACCAGTCACACCTTAGTGAGGAATGAATGTTACTGTAAATATCTTACAGAATATGTTTATTGTCTTCAAGATTTATTTGAATGTAACACCATTGGACCAGCTGCGCCAGATAAAAAAAA
>Locus_50643_129
ATATTAAGATAAGTACAAAATACTTTATACGGTTTTTCATGAGAAAATAGCAAGTTACATAGGTCCGTTGGTGGAAGTCTTAATAGTCTCATTAGTCAGCATCCCATTAGTCCTGTCATTTGCTCTCAC
>Locus_50642_77
TGTTGCCCCTGCCATTTCACAACAGACAGGAGTAAAACACCAACAACAGAAACGAGTAAAGCCACGACAAACTCACA
>Locus_50641_158
TGAATATAATGTCGATTGCTTATCGGCGCTTGTTGTCTGCGCTGCTTGGCGAAGGGATCACCACCACCAGTGCGGTGTAGGCATTCGCTTTACAGGCCCAGCTGCGCGGTGCGCAGGATCTGCACGACCGAGGAGCCGATGAGCACGAACGCGAAGAA
>Locus_50640_95
AACACACTTCGGTTAGATTTAATTTGATGTTTGAGCACAGGCACACGATTGCATTACCATGGAGTTTTAAGGTAAATTCCCCTGTACGCCAAATT
>Locus_50639_117
AAACAAAAAGAAAAAGTGAAGTTCATATTAAATTACATCTATTTTTGTGAGTGTTTAAATTAGACAACTATTTTAAATGGAGAGAATAAATATACTAAAAATTCACTTTTTTTTTTG
>Locus_50638_72
ACTCTGCGCGAACTATAACTAGAAACCCTCGTAAAATATAACAAACGCAAAATCCACATTGGTTTCCAGGAC
>Locus_50637_71
GAGCTTGACTTTTCCTAGATAAGATAATTTTCAGTTATCTTCATAGTATGGAAGCACTAGCAGGACTGAGG
>Locus_50636_71
AAATGGCTTTTACAGATTCTAAGGAAGGGGAGAAACAGCTGGTGGAAAATAACGCATCGCACTGGGTCTCC
>Locus_50635_76
TCGCGAGAGGATATCGCTTGATAAGATCTTAAAAAAACAACAAGCAAAACAACGTACTATCTGCAAACCTCCTCTG
>Locus_50634_105
ACTAGGGTGAAAATGTATGTGATATATATACACATGATTTTTCCATTTACATAACATCACTTTTGATATTTAGTAATGTTTTTACAGCATTTTTGTATTGATTTA
>Locus_50633_78
AGGCAGTAACTTTTGAATCTATAGAACAATAGAAAATAAAATGAAGTTAAAACTGAGACTCGCTTTAACTCTACTGAC
>Locus_50632_77
AAAAAACAAACACAAAAATATATTTTAAATTATCTTAAAAAGTGTCTGCTGCTACGCCAAAGTAACGGCAGACAACT
>Locus_50631_72
TAGTTACGTGACTCTCTGAGAAAAACGAGTACAATGAGATTCCCCACGAAAATGCTCAATCAGTCTGCGCTG
>Locus_50630_71
ACTTCGGGAAAAACGACGGTAAAGACTTTGACAATTAACTGACATAGTATAAAACAGTCTTGGATAATGGT
>Locus_50629_134
GAAGTCTGGTGTTATGGAACTTTATTTTTGGCCTTTTGGTGTTGTGTAAGACATTGCCTGGCATCTCTTCGTGTCCGTTTCAAGATGAAAGCCTTGTAAATCATGATCATCAACTCAGGCGTGACGTCGCCTGT
>Locus_50628_117
TATATACTAGAGAGTCGTTTGCATCTCGATGAGAAACCAAAGACTGTTTTGGAAACAAAAAGTGGTCCGATTCAGTGCTTGACGGTTCATGATGTCACAAGATTTTATCAAAATGAT
>Locus_50627_74
CATGTGGTCTATGCATTTTAAACACACCAAAACACTACAAACGCAAACTCACCACCTCTACGAAATCTATGACG
>Locus_50626_74
AAAACATTGGTGGACTTAGATAATAAATAACTGGTTACTTATGGATGGCCTCTTAACTCGAGAGAACGGAAGAG
>Locus_50625_78
AAGTCAACTACTCTGTAACTAAATAGCCTCCTAAGACAGGACAAAGACAAACACATCATCTGGTTGAATTTCTTGGCT
>Locus_50624_81
GTGTACCGAACCGTTTATAACAACTTTTTTAATTGTGCACAACAGTCGAACGCAAGGACTGTAACTAAACTATTATGCCGA
>Locus_50623_79
AAAGTCAGGTAAGTGAAGAATGAAAGCTTTACTTTTTTCATGTTTTAAAACGTTCTATTCATCTTCCAATGTAGTGAGT
>Locus_50622_72
GACACACGCTGCACAATACCTTTTATTTCAGTGGCTAGTTGTGGATGTCGTTTTCCAACTCAGTAACTTCGC
>Locus_50621_93
TTTTTTCTTCCTTTCGGTGTAGATGTTCCTGAAGATGATATAGAAAAGTACAAGCATGCCATTTATGTGCAGACCTGTAAGTTGTTTGCAGAC
>Locus_50620_74
CGCAGGTTGTAGGGGTGCCTTATACAGTTTATCTTACTGGTCTCTTGCAGGACTATCTTCAGACTGACATGGGG
>Locus_50619_71
GAAGAACAGTGGAGGTTTGACAAAATATTTGCAAAACATAATAGGAAATTAAATCCTGTATTTGCACTCTG
>Locus_50618_76
AAACTAAATTACTCAATTTTACTTTAAAGGGAAGCTTGGGCAAATGTCAAGAGAAGCCTCGTGTATACAATCTCGA
>Locus_50617_105
CAGGTTTACTCGAAGGATTCCCAACCAGTGGAGCATCACTCAAAACTGCTCTTTGTTAATTTCAATCAAGATTCCTCATCTTTACAGACTGGATCAAAGACAGGT
>Locus_50616_71
CCATTATGTGGAGCCATAGGACTCATTGCTAGAACAACTCTGTTGATGAGAACACTGATCTACTGTCTGGA
>Locus_50615_80
TTATTTTTATGAACTTCCTCCAAAATACAACCCTAACACAACAACAAGTCAAACACTTGATTTTTAACAAAAAAAGAATT
>Locus_50614_298
GGTCTAACTGTAAAATTTTATTAATCACAGCTTTAAAAACAGCAATACTATTCAGTTCTGTATGAGTCTGTAAGTTTTTATTTATTATTAGAATTAGAGTCTTATCAGGGAGTCTAAGAAGCTCGCTTTCGGGCGTAGTATCCAAGGCATGCACACACACCAAGGATGCCAACAATGAGGCCTATTACCAAGGCAATGGCATCACCGGCGTCGAAAGCTGCAACACCAGGTAGAAATAAAGATAAAACACATATTACAAGCTGCATAAACTCTCCGTTGCCAGCCATTTTGATGCTCA
>Locus_50613_90
AATTAGGACCGTCGTTGACATCTACGCCTGTCTTGCAATTTTTCTCTGGTTTCATTCACTGATTCATATTCAGGCGCATAGCAAACATGA
>Locus_50612_156
GTCCTCTGTTGAGCACAGGTGAACGGTGACCTGCAACTGGATTATCTCCTCCCTGTTGAGCATGACAGTGACCTTGTCCTACACGCCTTACTCCCACTATGCCGTTACGACACTGGACCCGTTTAGAAGGGAATTTAACGCCACCAGGAACCACAA
>Locus_50611_90
AGAAGGCTAGAGATTACAGTTCGAGCAAAACCCAATAGGAAATCGACTTCGAGGCGAAGCTCGCGAAAGCCTTAGATCGGGAAGAGCGGT
>Locus_50610_177
AGGGACATCTTGAGACGATAAGTTGAGGACATGCTGGATAAACTCGTTTTAAATAAAATCAGATAAAATGATTGGTTTGAATTCAGTGACATACGATTCCTGATGATGGTGAGAAATTGAGACATGGTCAGCTCCTGCGGCACTAAAAATTTGGTCTTGTCTAAAACAGGTAGTGTT
>Locus_50609_111
ACTAAGTAGTGCCTGCGCTGGTCTACAATGCTGCAAAACAATTTTCTAAAGCACAAAAGGCCTTAGCCAAGGATTTAATGGATTTCAAGTTTGAATGTATTGGAAACCAAC
>Locus_50608_78
ACGTTTGTTATATTTTGGTTCAATGCAAAAAATAAGTTTGATTGATTTGAAGATATCTTGATTAAAATACTATTTAAA
>Locus_50607_253
AAGGTAGAAGTATGTTCTGGTGCCCTACATCTAAAACATTTTGTCTATTCTTAGTTAAAATTGTAACTCATTTTAAGATTTTGTGTGTGTGTGCGTGTTAGCAAATGCCTAGTTTTTGGCATTAATCAAAAATATCAAATTTTAGGTTAAATTATAGCAAAGCACCAAAAAAAAAGTGGTTTACTCATTTGTGTATAACGTCATGTACAATTTAAAAAATTTGATTAATTTCTTTAAAAAAATTTTATAGTAC
>Locus_50606_94
CCTCTGATGTTTTTTTGAGATATCAGAATCATTGATAAAGTTGGTGAAGAAAAGCCACCAGCTAAAAAATCACCTGAGAAGAAGAGATCGGAAG
>Locus_50605_120
TGGTTTCGAATGTTCATAATCAAGACATCTTGAAAGCATCAATTTATAAATTGATCAATAAATGGGTTAGGATTATATTTCTTTCGAGCTCCCAAATCTATAATGATTTGAACATGATTT
>Locus_50604_126
GGAACCAACTTTAACAACATACACCTTCTAACCTCTGGTGTGCTCAGCAGGCACCGAATATTTCTGCGTAGATTGTTCAGATCCAAAGTGCACAGCCCCTCGTATGCTATCTCCATATTGCGCCTG
>Locus_50603_76
GAATTCTCCGGTTATTCACCCTATGGAGCCCCACATTGCAGACATCCTAGCCAGAATAATCAAAACTAATTTGGCA
>Locus_50602_72
CAATTATTTTAGTTTTCCTTTGCCTTCGATGAGAGATTATTTGCTCAACACGGTTTGGAAAATGAAGAAGAA
>Locus_50601_62
AAAGTCCGTGGAATAAAGATGCTGGAACGCCGTAACAGGTGCATACAGCTACAAAAAAAAAA
>Locus_50600_127
CGTAATCCCATACGTCACCACTTTCCAGATCCTGGTGCCGCGTTGACTATCACTGAAGTCCCTGGTGTCGTATTCAAGGAGCCTACCCCTGGCAAATGTTATGCGAAAGCATCCAAAAACAAAGCTG
>Locus_50599_156
CTTGAACAGGCAGTTCCTATTCAGAAGAGGAAACGTCGCCTCCAACGCCAAGGAAGACCCAGCCAAGGAAGCCGAATCCTTCAAGGCTCAGGTCATCGTCATGAACCACCCAGGACAAATCAACGCTGGATATACCCCAGTCTTGGATTGCCACAC
>Locus_50598_222
GGTTAAATGTGGTTTGTGATATTTTTCTACATATATTCCCCAAAAATTAGCAAACGCTTTTGCAGATTCTTCAAGCGTTTTTGGAGTTTGGTTTGGAGCNNNNNNNNNNACTGTATTTGTGTCTTCCTCGCTGGAAATGGGCCGATAAGACGCAAGCAGATCTATGCACCTTGTGGAATACTGGTGAACCAAATAGCGAAGGTGACGAGGACTGCTCTGAGA
>Locus_50597_123
ACAGTTTACAACCGGGAGTAAAAAATATTTGCGTTATATTTATATTGTTAAGAGGATGTTTATAATAATTTATATCCAACACCTATTATAATTTAGCCATAATATTACGGTATTTACAGGAGG
>Locus_50596_80
CTAAGCAGAGGAATAATAAGCTATAGGTCAAGGGTGTTTAAGATCTGGCTCGCGGAACAGATCTGGCCCTCGTATTTCAA
>Locus_50595_118
CACCCTGTGACTCACGTGACACAGCAGGGAGTGCAAGAAGGCCATCTATAGGACAGGAAGGATGAGAGTGCAGAAGCCAGGAATCAATGCAATCTTTGTGAAACTTGTGTTTGCATGG
>Locus_50594_156
TCACTAAAATTAACTCGGAGATTTAATGAATTCACTTCCAGAGGTTTTAAACGTTGTTCAATGTAATTCTTTCGAGCTTCTAAACGACGTTGTTGTTCGCCTTTGAGATTATCTGTAGCCATTTTCATAATCAAAAGACGAAGTTTTCGTTTTTTT
>Locus_50593_71
TGTATGGTGTGGTACAGATATGATGTGACAACGTATGCCTTGCCAACCAACACATACCACACCATGTCTAT
>Locus_50592_145
CCAGTGAGTTATGTGAATGTACGCCTCAACATGTGTCGGTAGCACGGGTGCTTACGTCTATTTAGTTTCTAGAGACAAGAAAGGTTATTTAACCCAACATTTTCATCATGGTCGTCTTGAAAATGGTCATAAATTTTGTGGGAAG
>Locus_50591_74
GAAGGCTAGACTTAGGAGAAATGCAGTCACAAATTTCGCAATATTAGAATGTCCAGTGATAGCTTTCTTTGTTC
>Locus_50590_72
ACAATTGTCGCCCAGAAATGTCTTTACACCTGTGCTTAAATGGAAAAAATAGCCGATACTCCGTTAGGTCAA
>Locus_50589_73
TGCGTACAACCATGTCATTGAAGTGAAGCACATGGGTAGGACAACACTTACACACGCATGTTGGTACAGTAAC
>Locus_50588_176
GGAGTGGATTTTGATAACTGTAACATTTAATATAATTTAGGGCCTAGGGATATTGAGTGTACTATACAAGTGTTCCACTTTGACTTCAAGCCTATCAATTTTTGCATCAATTCTTTTGACCACATGCAGTAGTTCTTCCATGTTTTCCTTCAAAGTAACCATTGCTGAGATCGGAA
>Locus_50587_106
ATTCCTAAAGAGTTCATTCATCAATTTTGGTAAAAAACCCTTCAGATGCAGCAATGAGAAAACTGTGAGAGAGGGTCATTAGTGGAAATGGTAAATGTTATGGGCG
>Locus_50586_110
TATTCGAGGGGACCTATGTATCCTCTTCCCAAAGTGAGTCCCAGAAGAAAGGAACTCAACAAACAAGTACGTCATCTTCTGCCCAAGACTTTTATCTTCGAAGCAAAGAC
>Locus_50585_101
TCAGTTAGTGCGACAGTACCCTTTGCACACCTCTCATTGCATATTGATAATAGCGAAGTTCGAATAGGAAGGACGTGTGGTTTGTGGTTAGATTAATTGAG
>Locus_50584_130
TTTTGCCGTTCGGAGTATCGCAACACATGTAAAGCTGTTGCAATTCTTGGGAAATGTAATGAAGAGATGTCAGAACTAGCTTATCAGTATGGGAAAAATCTGGGCATTGCTTTTCAGCTTGTTGATGATC
>Locus_50583_155
ATAAATTTTTTTGTAAATATAATTGTCAGATTTAAGAATTATGCTAAGAAAAATAGTGATTTAAAGAGTATGATAAACATGCCAAAAAATTGATGATCAATGTAGCACAAAAATTCCTGTACCAAAAAGCAATCCAGACATTCCAGTATTAAATA
>Locus_50582_161
GACTAAACCTGCCATGTATTCGATGTCAGCTGGGGTCCAGATATGTTGACTTTTGTTACAGCCACGTTCAGGTCGCAATAGATGTCCATAGTCTTGCTGTCCACCAAAACTGGCTTCTGGTTCACAGAGACCATCGATCCTCCCGCATCGTAGTAGGATAT
>Locus_50581_145
CTATTGTCCCATTATAGGGGTTCTGTTTGCAAGTCTGCAAGATGCCTTTCAGCCTACCCTTTATTCCAAAGCTACCTTGGTCGCCCAATCTGCTGACCCGTCTATTACTCTCCTTCGCTATGGCGCTTATCCTCTCTTTCACCTT
>Locus_50580_92
GGGCGGTACTAAAAACATTGATCTACCACCAGCATGTTTCTTTCATTGTGAGTTTAGATGAGTCTGATCAAGAGGCAGAAAATTTAATTTCT
>Locus_50579_97
CCCATTATGTGCACTTGTGGAAGCCGAAACCATGAGAACACTTCTCCTCCTTTCCATAATCGCTGTTCTTGCTCTTGCCAGCAAGCCTGTTTCACCG
>Locus_50578_101
GTGCTCAAAGTTGGTATATGGAACTGTCAACGGCGTGGAATGTAACACTTTCAAAGAGGCTTGCCAACAATTGTGTCTTCTTAAAGACGACAAGATATGGC
>Locus_50577_89
GAACAAAGGTCACCCACCGCCGGTAGCTGGGGTCTGTCGTCAGCTTGATTGGATGCTCACCGTGAGTGGAGATGGTGTCAAACCAGACC
>Locus_50576_83
AATGAGTTTTAACCAATTGTGCTCTTGGAGTTCAATACAGAGATGCATCCAGGCAGGGCCAGCCTTAGGCCACTGCAACCTAT
>Locus_50575_116
CCATAAAGATCTAAAACTAAAGACATCGAATGACAAGACAAAAAGAAGAGTTCGTAATGGAAATGATTGTAAAAGGCAAGAAAAGAATGAAGTGAACATTTCGAGAAAATAAACAT
>Locus_50574_71
TGGCCGTTAAAATACCGACCTTAGCAGTCACGCCACCCTTCCCTGGTCTTCCAGTACCTTGATATACATTG
>Locus_50573_90
AACTTACCGCTGGTCAAGTTCTAGCGTCAACGAAGAAAATATTCTTAAAATATTTACTAAATGTCAATCGTATTTCATATATTTTAAACA
>Locus_50572_120
GTCCTGAAGTCCGTGAGACTCACCGTCGGCCTCCTGGTAGTTCTCCAGGATGCAGCACAAGGTCCTGGTGGTCGCGCACAGTGTTGCGTTCAACATGTGCACGAACGGCTTGGACTCTGA
>Locus_50571_130
TTTTTTTCGGGGGGCGGATGACCGCCTGCGATGTAAATGTAGTCCACCGGAACTGACAAAGAATTAGATTCTGAGATGCCTTGTCGACAAGTGTCGTTGGAAGATGTGTCCAGTGTTGTGTTCAGGTTTA
>Locus_50570_102
GCCTACAATGACGATCATCACAGAATATTCTCAAAATATAACGTCGTCGACCGCAAGTTTTAGATCCCTTGTGCAGCACATATTTGCGATTCTATGAGCGAG
>Locus_50569_119
GCTGAGGTATTAGGGCCCAGTCTAAATTCTTGGTACCATGCTTTACAAACCCTTGCCGCTGCAAACCTATACGCGTCGGGTAGCGTTTCTAAAATAATCCTTAATGCTACAGCGGGAAG
>Locus_50568_165
GCGTTGTGCATACAATCGCTAAGGATTAAAGCCACGTCTTGTCATCAGTGAAAATGATGGCAAATGGGCTATCCGATCCGAAAGTACACTGAAAACAACCAATTTGGAATATACACCAGGTACTGAATTCGATGAAACCACACCTGATGGACGAGAAGTTAAATC
>Locus_50567_113
AAGACGTAATAGTGACGAACAACGATATATTTGAATGGTTTACCTAATCGTGTCAATTCTGTGAGAACATGATCGACAATATCTGCAGTCCATCGATTGACTAGATCGGAAGA
>Locus_50566_162
GGTACTGAATTTTGTGCCGTATGGGACTTATCTTAATGACCCTTGTCTTACCCCGTGCAGTTGTTTCGTTCCTAATCATCCCAAGCCTAGAACCCTTGTGTAAGTACAGGAGCCAGGTGTTGAAAAACACGATCAGAAAACATGGCAGCCCTGCGATCAGTA
>Locus_50565_73
AGGTGGAGTCTGGACACGTGACATTTAAACATACTATCTAATAACATCTTTGAAGAGATATGTGATACAAGTA
>Locus_50564_75
GAAGATAATGAAAAAATATTACCATTTTTTTTCTTTGTACACAATTTGTTACATTTGCAGAGATGATTACCCTGT
>Locus_50563_98
CGAAACACCCGCCCCGTCGATTTTAAATATTTTATTTGCTGTTGGTGGACGTGTTGGCAAGCGTCATTTGGTTTCACAAAGAAATTTGCTTTCAGTCT
>Locus_50562_72
AGCTTCTTGTTTGTGCAGTTCGAACGATCGAACAAATGCTCATCACCTTAGATCAACGCAATGCATTTCTTA
>Locus_50561_87
GTGAACTTGTTAGTCGCTCGCTTTCTTTCTCGGCCACTGGTTGTCAGACATGGACTGGATGCGGACAGTACACGTGTAGTTTCCTGC
>Locus_50560_107
CCAACTATATTGCCATCAGGTGCCATGTTGCCATCCCCGTGGACAAAGCCAATTGCCAGGCATCATTACAAAGACTGTCACACATTCCATAACTCCAGTGAGAACAT
>Locus_50559_87
GAAGGCTAGAAGAATTAGGCGCCCATGAGATACACACATTTACTTTCACGTATCAACAAATTGATGATGTAATAACTAGATCGGAAG
>Locus_50558_112
GCCCGTACATACACTCTTATGAATTCGATCAGATGCCCTGTGAGCTGGTAGAAAACTTTGACCCGACATATCCCATTGTTATGGGCGGGATGACCAATGTAGAAGAAAAGTT
>Locus_50557_85
AGAGAGACATACGCCGTCGTACTTGCTGTTTAATTATGTTTCCCTTCTGCTGCCTCTATTCATCATAAAATTTTCAGATCCACTG
>Locus_50556_156
GGTGTGTTAAAAATTTGATTGTTTTTGGATTGGCAAAGTCTCAAGTTCTGGTACTGCAGTCATTTTCCCAGCTGTTGAAACAAGATTTGTGTGCTTATTTCTTCCAATTCAACTCTAGGTCTGTTTGTAAGTTCCTGGGGCAACCAAACAAGTTAA
>Locus_50555_72
TTAGTTTTTTGAAACCGGTTTAACAGCTTCCGTCATGACAAGATTGCCGACAAATCAAATAACTTTGGCCAA
>Locus_50554_259
AGACCATTTGAGGCACCAGTACGTGCCAAGAGCATGAAATTCTCTGACGGTTACCTCATCCACTCTGGTCAACCCCTTAACGATTACATTGACGTTGCTATTCGCCACGTCCTCCTTCGTCAAGGTGTTTTGGGTATGTTAGTCAAAATTATGCTTCCTCACGATCCTACTGGTCGTAACGGTGTTAAGAATCCTCTTCCTGATAACGTCACCATTCGTGAACCCAAAGACGAAACCCCCGTTGTTGCTCCTACATCTG
>Locus_50553_94
AGACGTCTACTAAAATGACTAACAGTTCGACACTGTTAAAGACATATGTCATGTGCAGACGCCAATGCCAATAACTGTGCACAGGTGATTTCCC
>Locus_50552_85
AATCTTCTCCAGCTCCTACAGGAAGTTGAGGGCCAATTTGATGATGCTGATGGCAATGAAGATAAGCAAAATTGTGACATTACAA
>Locus_50551_114
CCCATTATATAAAAAAGTGAAACATGTCTATACATGGCTGGTTCATTGAACACGCCGCAATATTCTGCGCTGTCATAAATATGCATGTTGAAACATTTCATCAAGATGTTAAGT
>Locus_50550_128
CCCCCCCATTCGAACCCCATTGGCAATCAACAAAAACAAGTGGGCGTCACGTGACCTTCCCAAATTGTCTGTATACGCTCTAATTTATGAAATAGATACGTCTCCTACAAGTCATAACGAATTGCTCC
>Locus_50549_102
AGTCACTACTGGCAGGGTCGTAACGAATATGAACATATGTAAATATTGTAATTAAGTAACCTCTGCTTATCACCAAAGAGTCTTGTCTTTTTTTTTTTTGGC
>Locus_50548_73
TACAGGTTGCTCAAGGATATAATGCCCCTGAAGTCGGAGAACATGGAGATCCCCTGAAAGTTCCTGACACAGA
>Locus_50547_132
ATTTAGGGGTACACATTATATTTTTTTACCTCCTAAAATTACAAATTTATTCAACAAAAGTTATCCACCCGTTTCACAATGTTCTTAAAAAATATTTTAAGGCATATCGATTATTTTGATACATCATTTTTA
>Locus_50546_109
GACGAACTAATATAGTGTTACAACTTTTCAAATTCTGAATTTGCATAAATTTGAATTATTTTGGCTACATTGATAAACAAACAATTTTCAGGCAAAGAAGATAAAATTG
>Locus_50545_108
GCTTAATCTCGGAGTGAAAGACTAAGAGATATTGATCTGTTCACAACTATTATATAATAATCGCTAAGCGCATGAGCGCAGTAGCAGGGTTGGAGATTTGGAGTAATA
>Locus_50544_143
AAATTTAATGATAAGCTTATTACATTCTTTTACTTGTAAATATTACCATTTCAAAGAAGCACGCGAGAAAGGAAATATATATGTCCATGTTAATGATGGTATATTCAATGTATATGAGTTATATTAGTTGTGTAGTGTGCAAT
>Locus_50543_86
ACAACAACAACCACAGCACTTAATGGTTTCTGATCCTGTACCTGCATTTTCATTGGTTGATCCATTTTCGTTCGTTTGTTTATTTA
>Locus_50542_85
CTGGAACCCAGTTCGTTTTATGTAAAATGTTAGGAGAAGAGGTCAGCCGAAGTTAATTGGGACATTGGATTTGGTACCTAGCTAG
>Locus_50541_91
TCTCATTGCTACACTGTGTCATGCGGCTTATGTCATGTCCCTAGAGTCACCTGTTACACTGACATGCGTCGTGTGTCATGTCCTTAGTCTC
>Locus_50540_88
CGAGGGACCAGCACAGACCCACGGTGAAGACCGTGAATGGAATTTGCATATTCGAAAACTTTAATGTATTTATGTATCAGCGGCTTGC
>Locus_50539_123
ACCAGTGGTCATGGTCCACTGGACCGTTGTATTTCTCAATACACGGTAAAAATGATGGCGTGACGTAATTCTTGAATTCGAGAAATTTCAATGCAAAGGTCGTAGGTCAAATGGCAGGTTATG
>Locus_50538_120
ATCCGGCGACACCTGCTACCTGCGTGCGATAGCCACTTGCAGCCCCAGCAACTGACGCAAGGAAGAGTGCACGAGCTGCTTGCAAAAATCCGGTGGCAATAAGGGGGACCCCCCGCTTCT
>Locus_50537_163
TTACCTTTTATAGTTACCGAGATAACAATTAAAGGTTCTAGTGTCGTGGTGGCCGATGGATCAGCTTCTCTTCCTGGATTTTCTGCATTTACCTACAGTGATAAATATTCAGACATGCAGGACAAAATGTACCTGACAGAAAAAAAATTAAAAAGAAACAAAA
>Locus_50536_85
GGTTCTACCGGGTACTCAAAGCATCCAATGAGGTTCATGAGGTCAAGTCATGGCAGACAACCCCATGGTGGTCAGGGGCATCTAA
>Locus_50535_117
ATAAATTGTGACTCGAATAACTTGTCCGTGAGATGTTACTGACTAATGACAATGAGCCTGCTTCTGAAGACATCGAGGATGATTGCTGTCACATTATTCACTTTAACAACAGAAAAG
>Locus_50534_118
GGACGAAGTAGTGGGTCGACTTCAAGAAAAAGCCTACCAAGAAATCCGGGTTAACGTGGGAGGCGAGCGCGCCCCTGAAATGGGGGACCAGGCGAAGCTCGTCTACCTCAATGCTGTC
>Locus_50533_96
AGACGGTTTGTAGTAACCCTAGTCATATTCTCCTGTTCATACCATTTATTCTTCAGGCTGGCAAAGAGATTCAGGCATTTTGAGTCTAAATCTGAC
>Locus_50532_111
ACAAAGTTTACACCATTTGGCGGTCACAAATCATTCGACTGTCCCGAATCGAATAAAGGTCGATCATCATTCTCCGATCGTAGCAATGGCGGTATGAAACGCAGTTTCTCT
>Locus_50531_107
CTGAATACGAGGTAGATAAGCAGCTGAAAACTTCTCTGCTCTCACTCGTTTGGATCATAACAGAGCTAAGGCTCAAGTTGCTGATCGTCTTGGTCTCAATGTTTCCG
>Locus_50530_108
AAAAACATTCCATTTAGGTATTTGTCGAAGTACAGAAAGTACTTGTTGTGGACCTACTTGACAGAGTACCCCTTCTGAATGATCGGATAACACATCATTGGAAAAATT
>Locus_50529_75
CAGTCTGAATGCGTAGTTCTTGTCCATGTACACCGCTCGAGTTCCTTCTGCTCATGTTTTTAATTTGGGGGTTTC
>Locus_50528_105
CCGGCAGAAACCAAAGAAGACTCCCGCAGCTTTCTTTGGCTTCGCGCTCTTGGCCTTCTTCTCGCCAGCAGCCTTCTTGGGCTTAGCAGCAGCGGCCTTCTTTGG
>Locus_50527_98
CAGTTGCATTGGTCACACGATTCTGCAGTTTTGGTGCTCATCACCGACGTGCCCGGTTGGCGCTTCAACGTAACCGCTACCGGACCTCATACTATGGA
>Locus_50526_78
GCGCTGTAAATACCAAAAGAATTTGCTAATTATTTTATCTTATTTTAGTATAGATCTATTTATATTGTTTTTTGTTTT
>Locus_50525_168
TACAACCTGTTTCTTCTTTGAAGTGGTGGAGAGAGCCCACCAGTTCTTCAGCTTCGTTTGCAACAGCCCAAAACTGAACCCAAAGTTAAATGGTCAACAGACACTATTGACAATGAATTTATGGGAAAGAAAAAATCCAAATGCTGCTGTATATATGAAAAGCCAAAA
>Locus_50524_133
GTCAAGATAACTAAAACATCCTTCAGGAAAAAATGATGAATGTTTTGATCAACAGAAAGCTCAAGTGGAGGGAAGACAAGATTGTTTTCCTCAGGTAGCTGGGGAGGTAAGAGAAGATTGTTTTCCTCAGGTA
>Locus_50523_126
ATTACAATTTATTTCAAACTATACAATAATAAGTCAAAATGGTTTGAACATGCTGAAAGCTCTATCCTCGCATGACTAACACAAATGGTAATAAAGCTGGTGCTGAAAACAAATCAGAATATGCAA
>Locus_50522_293
CTTCTGTAAGGACCTCACATAGACAGAGACCGGGGAATGGGAGAAAACTTACACCGGCCTTTCCAAGTCTTTCATACACACGGGCCTACAGCCTTACAAAGTTTACAGCTACCGGCTGAAAGTAGAGAGCTCTGCTGTGAAGAGTGATTGGAGTGCAGTGAGTACGATCAAAACACAAGCTGCTCCATATAATGGCGACGACTTACACCAAGCAGTCAGACGAGGAAACATTGAGAAAGTCAAGGAAATACTTGACTCGGGGGATGTTAGCGCCGATGCTCAAGATGAAAAAG
>Locus_50521_97
ACGGATGAAAATAAATAAAAGATTTATTTGGTGTGTGTGTGTTGTTCTTGTTGACATTTTTAAGATTGGTGTCATTATTTATATTTTAAAAATTGTG
>Locus_50520_83
AATTGTTTTACCAGGTAGTCGACTTTAACTTCAATAACTGCTGATTTCCTTATCCATCTTCACCAGACTAAAGGAACATCAAC
>Locus_50519_122
TAATGTAAACAGAATGTAGGCTAACCATGCATTCCAAGCAAACCGCTTCCCGAACCTTTAAACCCTTCCATTTAATGTTTTTATGCATGCATGTTTTTGGGAATATTTCATAATTTTACAGG
>Locus_50518_95
ATTTCTCCAGGTCCTCTACCAGGAAAACCTGCCGACTACCTGTGAAGTGACCTTTACTGATCCCAGCTGTCTACATCAGTTTTCATTAACCGTCA
>Locus_50517_98
ATTTTGTGGCACCGAATGGTGCTGGTCACATCTTTAGCTGCAGTACAATGACCAGTAAATGTATCAATCCTCAATATGCATAATTTGCAATGTGTGTC
>Locus_50516_132
TTGTCCCATTAAACAGTTGTTCTCTGTTGTTGTGCCCGCCGATAAGGAAGGTACCCTTTCCGCCGTCGACTGGATCAATGCCGCTTTGGCTCCTTATGGTGCCACTGCTGCTGAGGGTTCCACCGCCACTTT
>Locus_50515_73
CTATGATACTATTAAAGGGCTGAAGACCTATAAGAGCTTTAGGCTCATGACGTCATTCGACAATAGGATGCAG
>Locus_50514_182
ACCCTCAATAAGTCTTTGCTAGTCTTAGCGAGGATTTCAGCAGGGGAAAAGACAAATCCTGCAGATTTCCGACCTAAAAGTACACTTTAAGACATCACCTAGTCAGCGGTATTATAACCTGTGATAGCAGCTGAGAAAATATGGCATATTGTTGTATATTGCCTATTGTTGTATGTTGCCTA
>Locus_50513_256
TAAATTTCGATTCTTCGATTACTTCGAATACGAGGGTTGAGTTGGCAGGGATAAGTCCACCTCCAACTGATTGATTTCCATAAGCATACTCAGGAGGGCAGGTAATCAAAGCTTTCTGTCCAATTGACATTTGGGCAACACCTTAGTCCCATCCCTTGATCACTTCACTAGCTCCTAAAGTAAAGGTGAATGCTTTTCCCCTGGTCACAGAAGAATCGAAGACTTTACCGTTGGTAAGTTTGCCTGTATAGTGAAC
>Locus_50512_250
TACCAAAACTTCGTCATCCTTGCTGTCTTTGTCGTCACAAAGGATGTCCGCCAGGATTCACAGATGATGGTGTTGCTACATGTATAAAACCAGAGGCATATGGTAGAGGTGTGGGTTATCCTTGGAAATTCGGTGATAAAGCCAGTGAAAGCGGTATGATGAAACGTTGCGAAGCAGATTATGGTGCTGGAAATTGTGAAGAATACGGCTTAGTTGTTTATCCAAAATGTAAATCCGGGTATCATAATGT
>Locus_50511_101
TCTATTTATGTTATTACATTCACTATCTAAATCAGTGTGGTCCCATCTCACATAAAATAAATTCAATAACTCTAGCACAGCTTAAGAGTACAGGGCGACAA
>Locus_50510_106
CTTTTAAGCTGCCTGCTGCGCATTTTTTTGCATCGGGTGCGTGTTAAATCTTACAAAATGTCAAAGTCTGGGGTCAGTACAACCCCAGTTAAAACAGATGGAATTT
>Locus_50509_130
GTTTCACACGACGAATACAGAGTTGATTCCGTTGTTTTATTTTGTTTGGGTCACTGCAGAAACCCCGCTTCACATGTATAAGATGTCGGAATGATGATTTAATTGCTAAATGGTGGCAATCTCAGGATAT
>Locus_50508_154
TACGCGATAACTCGTGGTCCCTAACCTCTAATCTTATAGAATAAAGGGGTGCGCTAATTAGCACCAAGCCAACCTCTAATCTTATAGATTAGAGGTACGCTGTTCACGACCACCAGCTCAATATTCATGTGCCCTTTCTGTGTTTTTTTTTTTT
>Locus_50507_295
CAATTTTGAAATACTTGGCGTCCTCACCACATTCACTTGATAACCTTCTTCATTCATACACCAGGTAACCCGAGGCCCGTGGTCTGGTCTGGTGGGCGAGGCCTTTTACGTCCCTCATTATCTCACTGACAGGGCAGATCAGGTGTTTCGCCCCGCCGCCTCTAGACACCAGACAATGTCCCCCAGCTCACGGCCGTGTGACATCGTTAGTTCGACCAATGCCCTCGGACTGTCACCGTCTGGTCATAAATGTGTGTCTCGGGTCTGTTTCCCTTTCTAGTCGGATGCCCTCTTT
>Locus_50506_77
AGACAAATGGACAATTGGACATCAAAATTTTCAACATGCTCTAATGTTCCTGATCTTTGTTCTGTAATCGATTTCAG
>Locus_50505_74
TAGTTGTTTTTGAAACAGATAAGTCCTAAGTTTAAAAAGCACATTTATATTACTTAATGACAAAATTAGGTTAT
>Locus_50504_96
AACTTTAAACCGTTCTTTGATTTTCATTATGGATGTGACTATTTGGCAAGAAACCTTTTCATTATGGATGTGTCTATTTTAACAAAAAGATCGGAA
>Locus_50503_120
GATCCTGGAACCAGAAGAGGATTTATTATGAAATGCATACGTGCAAAAAAGCCTGTCTCATCAGGGCAATACATGACTCCTATACGAGAGCCAACGTCTGTTGCCAGAATAAGCTTTTTT
>Locus_50502_127
TGGGGGTGGGGAAAAAAAAACTCCAAGAGTTAATCAGGCAGCGGAGCTTTCATTCAGCCAAGTAAGTGTTAACTTTGAATGACTGCTTTCTTCAGGAGTTAAGAATGGGGCACGATGCGCATGCGCG
>Locus_50501_135
GTTGAATGGTTCTCTACCGTCACCTGATCCGATCCGCTTTCGCTCAATCGATGAGCAGAGCAATGCGACCCATGCGCGTCACCGTGCAACGCACCATGTCCTCGCACAAGAAAGAGACCGACGAGGAATTCGACG
>Locus_50500_91
ATTATGAAACGCTGCACGAAGGATGTCCTGGGCTGCGTTTGAACAGCGTTTCTTTGCCCGTTGGCTAGGCAACAAGAGGTTGTTTTTGTTA
>Locus_50499_101
CATCATAACGTAGTCAAAAATCTCGGAACTCTCTCACCCTAGCCATCTGTTTTTCTTCATTCATTTTAAATGTAACATATTCTTGTGTTGGTGGTGTTGGG
>Locus_50498_162
GCTACTAGAGCGAAACCTTTCATCCGCAACGGATATTCGAGTATTTGGAAAATGGAGCGGTGCAGAAGTACAAATTTCGGATATGTCCTTGGAAGATTACATTATCGGAGCAAAACAGCCGAAATTTCTTCCACATTCAGCTGGTCGTTATCAAGTGAAACG
>Locus_50497_82
CCGAGTAAGTAGCCGATGGCGGCTTGCGCCACGGGTGAGAAGGAACAAGAAGCAACAAACTTTTTGGAAAAGAAGCTGAAAA
>Locus_50496_125
CCTGTACCTACACCTGTGTTACAAAATACCCAGTTGGGTGTTGCTGCTGGCATTGGGGTCAAGGCCGCTTTAGAAAAGCATGGAAAACCAATAGGAAAGGTAACAATACTTGGAACACCTGCAGA
>Locus_50495_141
TTGTCACAGTGCAACAACTCCCCAGAGAACACGCGGGATTTGAGTTTGTGCAGACATGATCAACAATTAAGAGAGATGAGTTACGAACAGACAAGGAAGTACTGGCTAGTATGGTGTAATAAAGTAGTGGGGAAAAAAAAG
>Locus_50494_316
TCAGACCGTGTCCTATTACACGTTACCACATGCTTAAGTACCTGATACAGGATAATGTAGTTACCACATGCTTAAGTACGGACTATGTGGCTATGGCCTCTGGCACTGGCTAATTTGTCTGACAGTGGCTGGTTTGTCTGACACAGGCTAATGTAGTCCGACACAGGCTAATTTGTCTGACACAGGCTAAAGCAGTCCGACACAGGCTAAAGCATCTTGAATTTTTCATTAATCCTTAATTAAGATGAATAGTCATCACATGGAATGAACGCTCTATCTCCCTATTTTAAATGATATGCCAAAAAAAATATTACCC
>Locus_50493_78
AAAATTTACTTTCACTGCCGGACCTGCCAGCTAGCCACCACACAAGAACAATAACGATGGAGTATGTCACAGTCAGGC
>Locus_50492_93
AATCTCTTAACAAAACTTTGACTTCAGTTGATAAATTAATCATCTGCTTTGTGTGCTGTGCTTATCAATAGAATTTGACTTTGCTAAGAAACA
>Locus_50491_116
GCTGATCAAACGACAACAAGTTTGTAATAAATATTCTCCTCTTTCTGGCGCATTTTTCTTTAGCAAGCAGTGTGCTAAAACACTTGCGATGATGATAAGAACAAATGCTATTGGGA
>Locus_50490_110
GGCTTTATTTTTGATAGTAAGTCTAACCCCCTCTTCCCCAAAATATCATCTCACTTGACATACCTGACTCAACACGTTGCATACATAATAAGTTGGATGACAAGATTCAC
>Locus_50489_99
CAGTTGTCATGTAATACCATTCCATTAACACAATTTTTGTTTAATGGTATCAGAACCACTCAGTCATTAACCAGAACTGTTTTTTTATTTGTTTTTGTT
>Locus_50488_80
TGTACAAACCGGTTAGACGTTTTGGATGAAAACCGAAATCATTCTGCCAAGAGACTGGGCTCTGCCTGTTAGTAAAGGGG
>Locus_50487_99
AGATATTCAGATCTAGAATAAAGGTATTTGTTGACTCTGCTGGTTTGGGTTTAGCTATTACAAGTTTTTACATGATAGCAGATTCACTTGGACATTTTT
>Locus_50486_91
GCGTGTGATGAGTTTAGCGTACGACTACCCTTCACGTTACCGAACAATGTTTTGAAAGCACAATGCAGCGTGAGTAGGAAGTTCCTGTCGT
>Locus_50485_89
TTCTCGCGTGGTCTGTGAAGAAAACGTAAAGTGTTTTTCCAGTCATTTAGCCCTGTCTCCAGTTAACCTGATTCGAGGGCCATTTAAAA
>Locus_50484_350
TTAAACGAGTTGATCTCTTCACAGTCAACAGTTTCTCCCTTATCTTCTATGCAACTCAGCTGTACCACGTTTCCTTACTGTGACTGACTGGATGGAGGGCTTGAGTCTGTCAACTGCTTGGAGTGTGTACACAAACAAAAGTTGAACTCATTCTGAGCAGACAAGACGTCCTCACAACTTGACTTGCAATCAAACATTCAGCAGCAATTCAAAGAATTAAAGATGGGATGAATTAACTGTGTGTGTGTTTCTAGAACAATCCTTTGCCAACAACAGACCTGGTATTAATTTCATTGACTGGTTGGCAAGGTAAGAAATTTCAAATCTCCTTGATAGAGTTGATAGAATAG
>Locus_50483_90
ATTTTAGAGTTTAATTTTTATGTTGGCGCTAAGCTCATTTACATATGTCTTTTTCACTAAATACAATTACAAACATGGCAATAAATTTAG
>Locus_50482_77
AGGCTAGAGTTGATTTTTGACGGGCAATTTTATTTACAATTGACATCTGCCAGTGTCAAGTGATGCTGTTTTTTTTT
>Locus_50481_95
TGATGAGTCAGTATAATTACTATATATAAAACACATAATTATAATCATAGTATAGCAAAATGTTATATTTACATTAATGGTAAACATAAAATAAG
>Locus_50480_81
AAGGGTATACACGGGTATTTCACTGTTTACTTGACATATCACGCATTCAAGCGAGTTGTGTTTCTATTACATTATTTACAT
>Locus_50479_72
TTTTGTCTACTTGTAAAATGCAATCATTAATGGACACCCAACTGATGAACGCTTTAACTAGTGACACAGAAT
>Locus_50478_78
AACACCTACCCAAAAGACTACAAGCCAGGTAGACCAACGCTCTATCAAAACTCTAATTCTATTTTTTTTTTTAAATTT
>Locus_50477_107
GTTGAATGGTTCTCTAGATAATCATTGAATATCTTCGAATCATGATTAACAACTTCAGTCAAGGACAAATCTGCAGTCTGGTCGGTATGGGTGCTGCTGGTTGGGCT
>Locus_50476_116
AAGGCTAGAGGACCAAGGTACATTAGCGTGAGAGGCAAGTCAACAAATATATCACAAAGTCAGAGTAAACAATGAGATCAGGCTTACAAGAGAATAGACATTAGACACACAAGAGA
>Locus_50475_91
CTTTGTCAGCGCCTAGGCCTAATATACGACTATCCAGTTATTGGTGTAGCCGCGATGGAAACTAAAACAATCGAAAGAGATTCATGCATTT
>Locus_50474_76
ACTACCACCGACGTGAGTCCAGGACCACATATGTTTGAGTGACTGCGAGGACGGGGTTATTGGCAACACTTGTCAA
>Locus_50473_137
TCCGCATTTTAATATCTTAAACAAACATCTTTTAAACAAGTTCTGAACTATAGCAACTCAACCGTATGTGTATTTCAACGTCTGTTGGTCAGAGTTCAATATCTGCTCTCGCGCGTATATGAGAGTATGTATGTGCC
>Locus_50472_72
CCCCTGTACCCTTAATAAATAAACTACTTCCCTGCCACGACTGTGATTGAAATAATATTTAAAAGATCGGAA
>Locus_50471_102
GGCTCACAACTTTAAGTTCGTGTGAGCGAAGTAAATCCATTTTCCGCATTGTCTCATATGAATTTTGAATGCAGTTTTCTTGAGATGCAAAATTCTTTGCCG
>Locus_50470_104
TCCAACGACCTAGTGAAGGTCGTTCCGGCCCTGTCTCCTAGCATAGCGCAGTGCACGTGCTCAAATTGAAGTAAATATTATCCAAATAATCCAACTGATGTATA
>Locus_50469_81
AGGGTAGGAGATGGGAGTATGATTCGACCGTCCTCGCCAACTCCGAAACTGTATCCGATATCAGCCCAACCGTTGGTGTCC
>Locus_50468_166
TTTTTCTCGTTCCGGATGTGATTTCACACTGCAGCAAGTAATGGAAGCTTTAGACGATTCAGAAGGCCATGAAGCATTTTGCTTCATCAATATGATTATTCTAGTTCTAGTGACGTTGACATGGATCGTGATCTCGATAGTGATAGGTCAAGTGATGATGATGATA
>Locus_50467_82
TTTTTACTCAAACGGTATTTAGCTGCACATTTTCCTCATATCTTGCTTATTCATTAAGATGTCGACTCTTTCGGTCTCACAA
>Locus_50466_139
TTGTTACCGTCTATTTGTTCGGCAGTTAAACAATGGCAGATAAACAAGATTAAAATGAAAGACAAGCAGGCGTACATCAGTGGAAGGGAAAATTTAAAATTTTAATTGTGAAGTACACGAGTTACAGAGTTTAGGAGGT
>Locus_50465_82
GTTGTAATAGTGTTGCATATTTGATCTAAACAAAGACAAAGTCTCATTCAAATTAGCCATTAAAAGATTATATTACAAATAA
>Locus_50464_125
ACCATAAACGAAGTAAAATTTTCTCAAATTGATAATACCGTCACGTGTCAAGATCAGATGTTTACTTATTTAATGTGTTTAACAAAATATATTACTAAAATTTGATCTGAAACAGTAATCACGAA
>Locus_50463_284
TGAAAAAGACTTTGCCACGCTGCTTATTCCGGGCATCAGTTCTGGTGGGTCATCGTGTCTGCACGTCACAGTTCACTGCTGTACTCCGAAATCAGCAAGTTAACGAAAATTACAGTTTGCTTAGTTCTTGTCTACGTATTTGGCTACTGTCATGCCACCAAACCCCACGATGTCGAAGCACAGCCTCAGCAGACCCCGCTTTTCCAGGAGCTCCTCCCACAGAATCTCAAAGAATGTCACGTAGATGAAAGTCCCTGTGGCCACTGCTTGTAGAACCCAACTGA
>Locus_50462_122
ATAGGTGTAATCATACGGGGACTCATATAGTTGTTTCACAGTTTATTCCATCTTGAGGTCGCATGATGACTGCATATGCTTGCTCTCAATCTCAAGCTTTCTCACAAAAGAAGACCAGAAAC
>Locus_50461_84
GGGTGTAGTTTTTTACTCTTTTAAGTAATAATATGGGATCCCTTTACCCAGTGGGTATCTAAGCTGCAGGGTCATTACCTTTAA
>Locus_50460_78
GTGTTTTTATATAACAGTCATTATAACAAAATACTTTTCGTATGCCAGACTATAGGTATTACTATAATGAAATGGCAG
>Locus_50459_101
TTATCGATGAGAGTCTGGAACAACTGCTCCCATAAAAGCTTGAACAACGTGAGGAGAATTTTCAAAGATGTTTGGCCAGACATAATTCAAAAGATGTATTA
>Locus_50458_84
AAACACTGAGGGAGGGAAAATGCAACCGTCTGTCATTTCGTCAAATTCTCATATTCTTCTCAAGATGGAACAAAAGGACCCGAA
>Locus_50457_85
TTCCGCGCCACCTTTGTCCTTGGATCACGTTTGTGTTGCTTTACTTCTGCTCAGCGGGGACGGAGCGGATGATATCAGAGTCTCC
>Locus_50456_141
ATACCAGGTTTCGTGTTCTCAAACTTTCAAGTGTGAAACTAGCGCAGCTTTATGCAGACCTACAAGTATATGACAGACAAGAGCTACATTTAAAGAAATTGAAAGGAGATAATCTTGACAAAGATGGTCAATATGAAGCAA
>Locus_50455_300
TAAGATCAGATTTATGTGATTGTGGCACTGAGTACAAACAAAGTAACCAACATTGCACCAAGTACAAAAGAAAATGCAAGTTTTACAAAGGCTGCTCCCACATGGCCCATGACAGGTCTTCTGCCTTTTTCAACCTCGAAGAACAGCAGTCGATCATCATTGCTATATATAGTCCTTTCAAAGGCATAGGTTGTCAATAAAGAGTCCTCTCAATCCTGGGCCAGACTCTCCTGCATCCCACAGATATGGCCATTTTTTTAAATATCTTCTTTCTTACTGATTTTTTTTCTCTTTCCCTAC
>Locus_50454_82
AGTTACTTTGTCTTTTGTATAATTCAAATGCCAAAACTGTTTTGTACATGTCAATTCATCCACAATAGGCAACATGAGAAAC
>Locus_50453_110
TTTGATTTGTTTGTTATGCTAAATAATGTTAATGTAATTTAAAATCCTGCATGTAAACATTTCCCATTGCTATAGATCCAACGTAACATGGGATTACCTTTGGAATGAAA
>Locus_50452_99
AAACAGCCTACCAAAGAGTTCTGTTGCTTCTTCCTCGGTGAGAATGAGTTCAATGTGGCAAGGGTTGGACAAGTAAGGGTTAATACGACCATGGGCTCT
>Locus_50451_132
CTTGTGTGGATAACTAGACTTCAATTACTTGTTTCATCTAAGAACAAATGCTCATAATTTTTATGTAGAATGGTTTATATTCAGGTGTGAAAGTAAGAACATTTTGTGCACATATTTATTAACTTATGGTTT
>Locus_50450_155
GCTTGAACGTCTCAAGGCTTCAACTAAAATAGGTGGCGAAGTATTCAGCAACTTCTTCGCGTTGGTCCATGCACACATCAGGAACACATAGGTCCATCCTAAGACGGATGAATTCAAGCTCGTTTTCGAAGGACGAGTCGCTCCCTTCATATTTG
>Locus_50449_348
TAAAGTATAGACCAAGATCAAACGAAGGTGCACGCAGAATAAATGAGTTCATGATAAGACACGACGCTTTTGACCCAAGACGTGGCATGAACTTTCCAACTGATTTAATGGATGATGCCGACAAGTTAAGAGAAGCTAGACTGGGTCGCCCTAATATTGCCTTACCTAGAAAGCTTGCAGGGAGCATGAGTAATCATTATTACGAATTTTGGAAAGTTCACAGAGATTTTTCACTGCTTGAATTCAGCACAATGGTCAGTGGCCTTCAGAGAGTACAAAGAAAAACAAAGATATCAAGTTCCTCATCGTGCTACGACATTAAATGGACTAGGGTGAAGGTGCGCATCG
>Locus_50448_124
GTAGAAATGTCAACGTAGCACTGCTGCATTCAGGGCCGAAGTATCCTGGTGGGCAAACATCATAACCGTATGCTTCCACTTCACACAACGCAATAACTTTTTCTCGGTTAACTACGGATATTTG
>Locus_50447_90
TCCGTGACCTACCTGATTGTATTCAAGGAACATGCTCCATTAACTACACACTTCTATAATATATTTGAAGAGAAGTTTGAAGATCGGAAG
>Locus_50446_107
CAAACCTTCACAGTCGGAAAGGGCAAGGTCAGTTGTGTGGAGATCACAAGAAATTGGAGAGAGCATAGTGCTAAGGATACATGTCCAAGCAAAGAGCTTGTGTTGTG
>Locus_50445_90
AACAGAGTAACGGAATCATTTTTCCTACAGCATATTAGTGGTTATTTGGATTTCTGTCAACGCCATCAATATCAAAACTGGCGCACGCCT
>Locus_50444_120
GACCGCAAACAGAAGAATGAGAGAAGAATAATAAGACCATTTGTAACATATCGAAAACGTTTGGTTGGAACGATCGTTGCGGCCCGTTCCAGTAAAGAAGAATCCGATGTTAGATTTTCT
>Locus_50443_107
CAGTTCAAACACATATTTTGAATTTGGGATTCGTGTCCTGAAGATATTTCTCTTTTTTCAAAGTTTGTAACAAGTCCAAGCCATAAGGAAAAAACAAAGAAAATGAT
>Locus_50442_82
GAAGGCTAGACCGAGAATTTTTATATATTATTGTTCACAGGCCTGATTCCTTGGCGGCTTCAAACTTTGTTTTTCAATGGCC
>Locus_50441_104
GTATAGACTATGTATGTTTCGTCAATGGATGGGTAGAGCACCATGAATGTAGATTCTAGAAATAATGAATACCAGATCTATAGGGTTGGCAGGTTTGGCACTGT
>Locus_50440_86
ATAAAAATCATAGTTAGACATTTAAGTTAAAATTATCTTAGTCATGTTATTTCACATTATAAATTAGCCTACTTATTCCAATATTT
>Locus_50439_116
AAGGTTTGCCCTCCATCCTTCTACTAGGCTGCCGACAAAACAATTTGTACAACATAAAGTGAAGAGAGAAATTTGATAGCAAAGATAATTGAAAAACAAATAGGATGATGTCAAAA
>Locus_50438_123
GTTGTTACTATTAAGCTTCTAAACTCGTGAGACAAAACCAAAGGATCGTTCAACAGAGAACAAATCTTCGAGTCGACAAGCACCACGAAAACGTGAAGAAAAATTATCCAAAACTGAACAGGA
>Locus_50437_111
CATAGCCTTAAGTGGCTGCTGTTATTCTAAATTACCATAGAACTAAGCAAATTCTAGAGACCCGAAGGGCTACAGTACAACAAAATTCAACGACACCAGAGGGGCCGGACT
>Locus_50436_456
AAACCTATAGAAAATAAACAGTGTGATGTGGTGAATGAAATGCGTGCAGGGTGCAAAAATTGAACCAATGGTAACACATTGATATATAACAAGCTCTGATCCTGAAAATAATGTAGGAATCATGTATTACCGACATAAGCGTACACATGTACACACAAACTTATGTTATTATTATATGTATGTAACATATACACGTGCAGGAAATTGACAGTGTACTAATAACTTTGGTCGGCCGATTCCCGAAGTTCCGGGAGAAACTTGGCCATTATTCGATGCAGCTTATTCAGATTTATAAAGTCAAGATGAAATGATGCTAAATAAATTCAGATGATAAATTCTCACTAGCGAAAAATGGAGTAAAGCAGATGCTGACAGATGCAGGTTTATTTTCCGATGTTTGTCTGCAGTTATTATGAACGCTGAGGTCGCTTTTTATAAGCTAGGAACAGAACATGG
>Locus_50435_85
TTTGTTTGTACACCAGTTTCAAAAAAAGTTCAATATAAAAGTGTCAAAAAGACTTGCTTACTATTATTACATATGTGGTGGTCAA
>Locus_50434_150
TCCGCAAATAAGTATACAAAATTTCTTAAGTCGAATTCATATTTCAATTTCACTTGGGCCTTACTTGATAATGCTATAGCAGGGTTCTCACGCTTCTTCAAGAAGGTATCACAGCTTTGTTTTATACTCAACTCTCCAAGTCAAATTAGA
>Locus_50433_84
CCAAGACGACATTGAATTATATCGTACTTCATAAATGATTTAAAAGCATTACTGCATTACTTAGGCAAAGACAAAGAGAGAATT
>Locus_50432_86
CAGGTGTGTTTAAAGTGTCGACCTTATCACACTGATGTAACGTCACCTTATCACAATGATGTGACATCACCTTATCACACTGATGT
>Locus_50431_78
AGAAAGTCCACCAACCAACAGATTTTAAGGTTTAAAAATGTGTTTCAAGTTGATGGAGAAGATGTCACCATTAAGTCA
>Locus_50430_101
CTGCCTTCACCGCTCTGCTTGTGTCCATTCCTGCGACAAGCCTCTGTCCTTCTGGTCATGTATCTGGTAGGGGACAGGCTTATTAAGGGTGTCCTCTGTTT
>Locus_50429_94
CTATTTCTTCTTTGGTGTCGAATAACAGTACATGGTCAATAGGCTTACACTTACACTTACAAATTTGTGTCCTTAAGTCACTCTGTAAATTCTC
>Locus_50428_231
TGTGGTGCCCTCAATTGGGTAATAGTAAAAACTGAAGACAGCCCTTTGAAAGTCAATCTGGCTCTGGTACTTATGTCATGTCGGAATCTCTGAGATGCAAGTGTTGCCAAATTGATTTGAGAATTTACATTCCTCTGATCCAAGCTCTGCATGGAGAGTGATATGCTGCTGATTTTGGACAATAGCTGGACTTCATGATACACCGCCCAGACACAGTACGCGATCTCCTGC
>Locus_50427_157
AAAAATGCCCAACAAAAAAAATTTGTCACTAAATAGACAGAGTAGTTCATTCAGTATGCATGCTGAGAATTAACACTAATGTCATATTTGATTATTTATATTATTGTTTGTGTACAACTGCATGTGTAAAATATTTGTGAAACTGAAACTTACCTGA
>Locus_50426_93
TCCCAATAGAGGACTATCCGTTTCAAGCATCTTTTCCAGCACACCTTCAACTGTGGAGAAGACTCCTCCCAGCGATCCCGATACAACTACACA
>Locus_50425_83
GACGGTTTTATTTACTATTTTTCAGATCATTCACAACACAGGACATGTGAACTTTTTGTCCAATGAACAATACAGATAGTAAG
>Locus_50424_73
CAAAATTGTACGTGGGACAAATGTACATACTGAACTCTTTCTAAGCATTTTTCACAGACATGAAGTAGGGGGA
>Locus_50423_123
TTGCAAAGTGTATGACGTTGTAGCATCAGGCCTTAGATTAGATATAAGATTTTTATAAATCGTCATAGAAATGATATGCACATTAATTGACCCAATTTATGACGTTTCAATTGTTTGGGCCAA
>Locus_50422_107
CTTTTCGACACCCGTCCACTTGGATAGAGAACTCATGAATGGCTACAAACTGTCCGTGACCCGACGCCTTTTTACAGAGTTCGTAATTCTGTTGAAGATCTGATTCT
>Locus_50421_98
AGGAGCTCGACCGGCCGTTGGCCTCGCGCGACAACAAGAAGGTCCGCATCGTGCCGCGCCACGTGCAGCTGGCCATCCGCAACGACGAAAAAAAAAAA
>Locus_50420_71
TTTTTTGTTTTTGTAAATTTACTATTAATTATGATGTAAAATTAAACAACCCTGTAAAAACAAAGTTTTTG
>Locus_50419_83
ACTCTAAGTTCGCAATAGTACAATTTATGGTGATGACTGGTGTGTGCTTGATTCAGTAACTCACAGATATGCAGTTCGTATTA
>Locus_50418_87
ACCTTTAGGACAAGGTCGACAAAGTGCGCTTCAATTACGTGAAGCTAATCTGAAAAATCTGCATCATCATGACGATCTTCGTGCTTC
>Locus_50417_97
GGCGCGTAGAATTTCCCTTGGTGGGTTACTCCCAGAATGGTTAACGTGTAGATTGAGTTTGCGGCCGCACATAAATATGATTAATGTTTATACGATG
>Locus_50416_90
GTTTTTTTTATTTAAATAGTTGATTGATCAAAGTTCAATATCAAACTATTGTGTAATAATGTTAACTTAATTTTTTTTTGATGGGGAAAA
>Locus_50415_120
CCCATTATATGAAGGACTGAATAGCCTTATCTGGATATGTAATGTTTACCAAAGGTGAAGACTTATCAAGCAAAGATGCAACCGTTTACATTCAACCTCTGTCAATAGCATTGGCTGGGG
>Locus_50414_79
TTTTTTTTAAAAAACGTTATATTTTAACATAAAGCTAGTAAAAATAACTTTACATCGTAGTGAACGCTTTAAAAAAAAA
>Locus_50413_204
AGACAAGAGTCGAGGAAACATAGTGCAGTGAATATTTTATGCAGGACATTTTTTGTCTTAATTTAATTCTTATATTTTTAGTTTTAGGTCGTTATCAGATAATAGGTCGGGTTGTTGAATACCGCAGATATCTGCTGTTGGTCGTGAGCTTGATTTATTTACAGTATTTTGTAATACAGAGCAGGGAATTTCATGGGTAAAGGT
>Locus_50412_81
CCCAGAGTGTCATTCTACTCTCCTGACAACACTCAGGTGTATCTACATTTATTGGCCAAAGGGATAGAGTTAGGGCTGCAA
>Locus_50411_87
ATCTTACAACACTTACTTGTAAATGGTAACAGTTTCAAAGTCTAATATGAACAACAAACAATGAATATTGAAACTGATCGCTATGAG
>Locus_50410_92
CCCCTAATGTGAAATTTCGAGAAACGACAGGACTACTTTACTAAGAAACAAGAAAAGGTGATTGAACACCTACTAAGTCAGAGGGCAAGAAA
>Locus_50409_99
TGGGTCGGTTGACACACACAGTGCTGTGGGCTGACAGCTATGACAGACTTTCATTCAGGCTTTCAGTAACCCTAATGGCAACAAAAAGAAATCTAAATT
>Locus_50408_78
GCTGAAGTCGCTCCTGTTAGTCGAGCATGTCATCCTTGACGACGACAGGACTGCGCAGGACCTCGTCGAGTGCATCAA
>Locus_50407_169
AGGGATCGGCTGTACCTGCGCACGCCCATTCCAACATTTCTTACAACAGTTGGGAAGATCTCTGCCGCCATCAAGTATATTATAGAGTACGAGGCTGTGATGCAAAATTTCCCAAGTAAAATAAAGACCTTGACGAGGATCTTGTACACTGAATCATCTTTAGTGAGAA
>Locus_50406_135
TAGTTGACCAAGTTCTAAACATGACGATGACGACTCACCATCATCGACTAAACCCACTACGCGTTCAACAGCGAAAGACAACGATCGTTCCTTTGCATCCTACAACAAACCAACTCCACGATCGAGATACGGCAG
>Locus_50405_84
CAAGTTCGAGAGTCCCTACACCGCGGCTAAATGTCTTTACTAATTGTTTCAGCAAGAATTTTAGGTTCAAGCTCTCAGGGATGT
>Locus_50404_86
GTTTTTTGTATATTTTTACTCATCCAATAATTCCAACATACTAATCTAATATACTTATTCACTCAAAAGACTTACAGTTTACACTT
>Locus_50403_96
CCAAAAAAGCGAAGGTAATTGAAAGTACCATTGACTGCAATTTTATCGACGGTTTGAATGGCAAGAATCATTTCACCTGTGCCTGTTCCATTCTTG
>Locus_50402_107
CAGTTCTACCGTGACTACCTAGAAATCTTTATGCGCCGTTCTGTCCTCTTCCTGTGCGTGTGTGAACCAACCGATGACAAGGATTTATCACATGACCTACTTACCGT
>Locus_50401_109
CCCATTATGACGAGACATGAATCACTATAACCATGTCTGACCGTAAGTGGAACCTTAACGCCGAGTCATGGCGCAACCACCCTGGGTTGAAGCCCAATCTACGAAATAT
>Locus_50400_156
ACAATGGAATCGTGACTTCTTGCTGAGCATTTCAGTTTGGAGAACATTGTCACACCACACAAATCTCTGTACTATTTTGCCCTTGTTGAAAAAAACATACAACTCCACATCACTACTTTTTTGCTCTTCTTTAAATAGAATGGCAACTGAAGCAGA
>Locus_50399_198
GTACAATAATTGTTGGTCGGTCAAAATTCGCGGGTGAGTTTTTTTAACGCAGATATTATATCATTACTCATTCTCAACATTAAATAATTAATGCTATTGATGAACGAAGATGAATTGAAAATCCGCTTCCTCAGAGTTACGTAGATGCAAATGGAACTAAAACTCGAGAGTTCAACATCGTCATATACGGATATGAAT
>Locus_50398_72
TAATGGGATCTGTCGTTGTTTGTGGAATAGATCTAATGGAGCAGATGGAACAAAGTGCTGTGATACCAGATG
>Locus_50397_93
CCCCCACCCCCTCATTTCATCAACGCGATTGTATAGTGTTTGTTTAAAGTGAATGTTGAGTTTGACACGAGGTTGTATAAATTACGATATATC
>Locus_50396_81
GTTTGATAAAGTAAGTACCTAAACAAATCATCTGAACTATAAATGCAAAGTACGTAAGAGTAATAAATAAATGAGAGATTA
>Locus_50395_78
CCCATTATGTAGCAGTGGTCACTTGTGTCCACACAGAAGTAAAAGCTTCGGCAAAATACTCGAACAATGGCTCGTTTT
>Locus_50394_201
ACAGGGAAGGTGACCATTCTGGTCAGCCTGGATGAACGTAAAATACGCATGAATGAAATTGGTTGGTGGTCAAAAGGACGAATCCAACCAATCCAACCTAATATGTCTCCTCCCTAAGCTCATTTCACCCGCATTAAATTCTGTCTTCAACGAGTCAACGCTTTCGGAAAGTTACGTGAAACCCAATCTAACCATTGCTAC
>Locus_50393_74
TTGCCTCTATGGGGCGTTCCGGGCTGCTGTGTTTGTAACATCTGGTATAACCCGCGGGAAATATGCGTGAAAAT
>Locus_50392_81
GGGTTACAAGTTGAGTACACGAGACACTCCTGCACGTAGAGAGATAGTCATCAAAGATGCCACTGTATCCCAATGTTCGTC
>Locus_50391_73
AGTTGACAAGTAGATTCATTAATCATTCTGATTTTACTCAGTCTTTCGTGCATTGTGATATTTATTCTCTTCG
>Locus_50390_99
CACTTTAATACTCCAAATTTAGCGACACGACCAAAGATTTAAGGCAAATCAAGGCCGCCCTTCTAAAAAACACACATTATGTATCCGCGCGAAAAGATA
>Locus_50389_74
AGAAGTGAGAAGTCCTGTAACCAGTTATGCAACAGATTTACTTATATTGCATCAATCAGATAGCCTTTAAAAAA
>Locus_50388_88
CGTCGACTACTCACTTAACATTGAGTGCTCTGTTGAAGACCTCAAAGTTTCCCGGTCCTTTTATCTTACTCAAATTGATGATTCAGAA
>Locus_50387_97
GTTTTACAGGGGGCTGGGGGACCCACGTCACATTTACTTCATTTGTGATGAAATGCTTTCAAAACATTTTGTTTTGACAGTGGCGGCGAAGCATAGG
>Locus_50386_102
AGCCGTGGTGGTAGCTGCTTTGCCGCGCGAAAATCGAATACGGTTGTTCCATCGTCACACCATCGAACACCGATGCCTGCTCATCAACAGCAACAACAACAG
>Locus_50385_101
CCGCTTCGAAATAAAAGTGAGGGATGTGAAGGACGTGTTCAAATTATTGCAGGATGTTGGTTGGCTGTGGGAAGCTGTGTACTGCACAACGATGGAAGAAG
>Locus_50384_109
TATTGTCCCATTAAGTATGGGACCAGTCTGCGGGTCAAACAACGTCACGTACGTCAACGAATGTGCCCTGAGGGTGTCCAACTGTAATGCCACTTTTGAGAACCCCGTC
>Locus_50383_73
AGTTAATGGTGACTTATTCTGTTTGTTTCTTAGTTTGTAAATTATATCTGATGGGTGATTCTCATTCTTAAGA
>Locus_50382_156
AGTAAATACAGTTAGCATTACAAGTTTTTATGATAAGTTAATATTTTATTTGTTTGTCATTTCACTTCGTGAGAAGTGAGAGGTCAGTCCGGAGAAATTCAAGGATCGTCATATAAATTAACCCATCGCCACCTTTAGAAATTCAAGGATCGTCAT
>Locus_50381_112
AGAAGGCTAGAAAAACCTGTCTTAGTAAAAATTGGATTAAATTCTCAAATACATTGATTGTTCGAACGGTATCCCAAATTTGAAAGCTTTTCTCACAAGGAGGACATTTTTG
>Locus_50380_104
AGACTTCGTAAGGTTATGGGATAGAAAACATTACTGTTATGTAGTCATTATTTATGAGTTAAGCGAATTAATGAAGTACAAGCAGGAATTATATTTTAAAGAGT
>Locus_50379_72
GTAAGGAGGTAACGGAGCTTGAAATGGTAAAAAGTTTAGAAGCAGACTAATTGGCTCAGTGTTTGTGAAAAA
>Locus_50378_104
TTGTCAAAGTTGTAGTTAGGAATGGAAGAAGATCGTAAACGTGTGCTTCTAACATCTCCGACATCCTTCATTGCTGAAGTGATGTTGGTTCTTCTTGGTCTTAG
>Locus_50377_82
GTAAAACGGCTTCGAGTTTGATTGAAGGTTTTATCATAGACCCTCTGAACGAACCGCAAGTATGCAGGCCCGTTCTCGTGGG
>Locus_50376_102
GAAGTAAGGTAATGAGATCGATATTTAGTCGAGCATCTGTCAACTCCTATCCACCAATTATAACAAAAGTGCGTTTAAGTTAGATTGAAAGCTATGAAAATT
>Locus_50375_80
ACTAAACTAAGAACGTTAGCTTGATTGGCACGGGATATTTGTTTTTGTATTGCTTCTTGTGCTCGCCGAGTTGCCGCCTG
>Locus_50374_121
GCGTACTTACAAACTTAAAGTGCCAGAATATTTGCTTTCATCTTGAGTTGTAATTCACTGTCTACTTTGTGTCTTCTGAGCTTGCACATTTTCTCCCATGCATTTGTATCACAGCCTTCTG
>Locus_50373_135
GCTTCCAGCTTAAGAATGTCCTGTGGAAGGGCCTGGTATCGGTGACACAAGGATCGACAATGATGAGAGGATTCAACTCGTCATCGCTGAGATGGAAAATGCAATGGCTACAAACCCAAAAGGTTATCACGCGTT
>Locus_50372_101
CTTTGTCTGTTTCCCTTAGATTTAGCGCATTTTGTTCATGACTGAAAGCTTACAATACTAACGTCAGTGATGTAGCAACACATTTTGACTATATGTTCCGC
>Locus_50371_129
GTTTGAACAGCAGTAGCCACATGGTGCTGTCGGAAAAACATGCTTGCTCATCGCCTACACCAGCAATACTTTCCCAACGGAATACGTTCCGACTGTGTTTGACAATTATTCCGCAAATATCATGGTTGA
>Locus_50370_131
AGACCCCCACATTACTGGGGCCTTGTGAAAAGAGGCACCACAATTCCAACAAAAATTTCACAGATCTTCTCCACGTGTGCAGACAATCAAGTAGGTGTCGACATCCAGGTGTATGAAGGTGAGCGTGCCAT
>Locus_50369_72
ATTAGCTGCTGTTAACCTCTGTATTCTTCTCCTACAACGAGTAATTCGATCGTTCTATGTTCGTCGACAATT
>Locus_50368_105
ACTTTCTTAAAATGGAGACGCTGATTTAAAGGCTCAGGTTGTAGCCCTTGCAGAATATGTTTCTCAAAAGCTGGGTGGCAAAATCCCTGTAGGTGAGGTGGCCAA
>Locus_50367_82
TGTTAGATCTCATTAAAAAATAAGTGCTCTTTCGCTCCACTGTATGAACAATAACTAGATACAATTGTATGAAACTATATTT
>Locus_50366_109
CATTAATGTGTTTACACACCAGAGCATGGTAAAGCTGCATCAGCACCACAAAGTGAACAGGCAGGCAAGAGCGGCGGGGCGTGAGGACTGGGGGGGAGGGGGGGAAGGG
>Locus_50365_74
TGGAGGTACATGGGGCCAGATCCTTCTCGTCTCGAGAAGGAAATCACCGAGATGTATCTCGAGCACGTCCTCAA
>Locus_50364_122
AATGTCTGTTATCTATTTGTCATATAAAAGTTCCATAGTCACAGTATTTTTAAAAATTCAACTTTCCTCTAATGGGCTCCTGGAATGTCATGCATAATTTTAAACAAATAATTCATATGATG
>Locus_50363_82
GGTGGCGTTTGCTCGTACCCAATGTGTGGCACAATGCCCCCCAGGTGCCTTGCCAGTACCCGCGACTCGGGATCTGCCTCGG
>Locus_50362_79
TTTTTTTGCTGCGGTCTTGGTCCTGGACACCGTTGGAAATACACATGACGAAGCCGGCAGAGCCCAAGATGGTCACGAT
>Locus_50361_118
ATTGTAATAAACTATTATAGAGACTGATTAGTTTCCAAAGAAGGAAATTAACTAAACAGTTTTAAATGAAAATGAACTCTACTGTGTACCTTGTCTTTGAAAGATTTAAAGACGTTTT
>Locus_50360_71
CGCTTTATGGTACCAGTGTTCGTCTTCATCCTGAAGTCAAAAGCTTTAAAGGATTCTTAGTCCATACCCCT
>Locus_50359_85
AGGCTAGAAAAAAACATTTCATTCCTTTTGAGGTTTCATTTTAATCAACTTGATCTGTTAAATATCTTTAATGGCGCCATTTATA
>Locus_50358_84
AGGCTAGACCCTGTAATTTGATATTGAGCCATCATCTTTTTGTCTTTACAGCTGTCCTCTACCCTGGATAAGATAGGTAAACTT
>Locus_50357_91
GTTTAGGTGGAAAGGGATATACTGTTCCTAACTGCCATTCATTTTTGTACAAGTCTACCAACTTTGTACCAGATGGTATAGTTTCTGGAAG
>Locus_50356_133
TTCTAAATATTTAGATCAAAAAATGTTGTGAGTAAATATATTCTTTTAAAGAAGAAATGTTTCAAATGAAGTAAAATGTTTTAATTACTCATTATAATTTCTAAAAGAGGTGTACTGCTAACGTGGTGGTTAT
>Locus_50355_82
ATAAAAAAATAAACAATCAATAAAACATAGGAGTTAATGTTTAGTCTTGACAGTCAGCTTGGTTTTTACTTAACATGACTTA
>Locus_50354_100
GAAGGCTAGATTTGCTCAGAATGAGAACCTACACCAAAGGTCATCAAGAAATTTAGAACCAAATATGTGAGAATTAATTTTACATTTGCTAGATCGGAAG
>Locus_50353_175
TCGAGCTTCCATACATTTGTCACGAACAATGTTTGTAAATCTACACAATCCGGACACAAGAAAAACCAGCGTCGTTGAGTTAACAAAGTCTATCAGATCAGAAACACCAGATGAAGGTTACATTGACGTCATTGATTATCAAAGGTGTACAGGGGATGTGACGTCAGGACGATTG
>Locus_50352_71
TATGTGCGGTTAACAAAAGATTCAGAATGCTTTATGTTTGAGATGTTATCTGATTTATAGCCAAGTGCTGC
>Locus_50351_175
ATGAGAAGTCGAGAGATTTGCAATGCCTCCCGTCTCCTGGACTTACACTAAAAGAATGCAGCAAATGTTTAAAGCTGAAGGACGAGTAAGAAACTGGGCAGAAACCTTGCCTAAACCAAAGTTAGTACTGCAATGTCAAGCAGAGCAAATCTTCTCTAAAACAAATGTTACACCT
>Locus_50350_97
TAACTTCATCACCCCAGCCCATACGCATAGACAGCCACGCAGGACAGATTCGGAGTGTAACCATGTGTTCCAGTGGGAACTAGCCATGGCAAAAGTT
>Locus_50349_74
ACCTAATTTCAGCACTTTCTCATTACAATCCCCTTTAATACGGGATAAGTTATCTAAAAGAGCTTAGTGTCTAA
>Locus_50348_125
ACTTCCAATTTGGACTCTTTTCTCTCATTCACCCAAGTATATGCTTGAATTCCATTAATAATGAAGAGGAGATATGAGGAAAATAATCAGTATGAATCAATGTTTGTGATTATCATTGAATTGGT
>Locus_50347_80
TAATTTTGAGTACTGATGTATATGTTTCTATAACATTGTTACTCATTTTGGGTAACAAAGTACAAACAATGTAAAAAAAA
>Locus_50346_79
TTCACGATCCCTCCTCATAGTGCTGTGGAGAATGAAGGACTTCTTTCAAGCCTTATGAAAGAAAGAGTGGGAGAAATAA
>Locus_50345_106
GTATCTACCGGGTATTGAGAAATCCCTCTGACATAAGACGCCTTCGATATTATAGTATAGGCTTATATGGATAATGTGGGGACGTTTAAAGCAGCTTGCAACCCCC
>Locus_50344_88
CGTAACCACACCAGGACTTTTTGGTCATGTCCCGGCATTGGTGTTGTCCTGACATGGGCACTGTCCTGAAATTGGTGTTATCTCACTA
>Locus_50343_84
ACTAGAGTTACAATGGATTTGGCTGAAATGAACTTTTCTCTATACATTATCTACAACAGATTGGTTATTTTTGCTTCTTTTTTT
>Locus_50342_126
CAGTAGTACCTAGCCTACATGCAATCGTGTAACCTTGATTAGTGCGGCACGCAATTTTGTCACCTTGATTAGCGTGGCATGCAATCGTGTCACCTTGATTAGAGCAGCACGCAATCGTGTCACCTT
>Locus_50341_120
GGACAGTTGTTAATGATCGCTGACATCATCAGTCAAGCAAAGTTTGCCTCCTTTCAAATGCATCGTTACTGAACTTGTAAATAAGTACAGAACACATTCCCCCCCTGAGTTAAACAATTT
>Locus_50340_71
GCCGGGACAGTGACAACAGCTTGGCAAGAACTTCGACGAAGTTGTTCGTGCTGAGAAGGATGTTCTCATTG
>Locus_50339_120
TTTAGAACAGAGAGAGAGACTCTGTCATCATCTCTTCGTCGGGAGGAAAAACGAAAGTAAAAAATGACCCACTNNNNNNNNNNNNNNNNNNNNNNNNNNNNNNNNNNNNNNNCGTGTCAC
>Locus_50338_145
TCCCGACAGCTTCTCGTAAGCAAACACAACCACAACGATTAATGGCAGCTATGTATAGATGTGAAATTCAAGCAAATATGGATGTGCTGGGAAAACTCCATGGAGTTTTATCTAAACGCCATGGCCAAGTATTGTCTGATGAAAT
>Locus_50337_131
GGAGTGCGGTCATAGAATACGAGAATCCGCCACTTCTTAGTGAAGAGCAGTTGCAAAAACTTCTGTCCGAGGCTCACTTTCCACTGAGCAGTAAACTTTTAGCACTCAGAGAAGATGATGAAAAGTTTCTT
>Locus_50336_156
GTAGTTGTTAGTATGCAAACGTTCTGATTAACAAAGATTTCATGTCGGCCTTATCATCTGTGTGGACATCAAACTTGTTGGACAGGGTCAGTGAGATTTCTGTCTTAGCCATCTGTGCCCTCAGGGCATCGTTAGTGGTCTCATCTTTGATTACTC
>Locus_50335_201
AATTTTAATCTTTTATGTAAGGTATCACAGACATACAATACAGTACGTTCCAAAGGTATACTTTACAACAGTGCATTTCTAAGGTAAACTTTGTATAGTATAAATTGATTCCGCATGTCCTAGGCTACCATGATAAAAATATTGATTATACATTGCAACACTAAGTTCAACTTCAAATTACATTTCATTTAAAAAAAAAAA
>Locus_50334_147
CGAGAAGGTTAGACTTTATATGTAACAGTGAAGTTGCTAAAAATGGAACTGCCCGGTGATATGCCTGTGACACTCACAATCAAAGCCCCAAATCAGCGCATGGAAGATCAAACTGTAGACTGTATGCTAGGGTGGACAATAAAAAAA
>Locus_50333_95
ATTTCTCACGTCCACCACGCGATTGCATCGTGTGGCACCATTACAGGAAAAGTTTCTAGTATAAGAAGGCAAGTGTTGGTGTTATTCATAGACGT
>Locus_50332_97
GAAGGCTAGAGTAGTATAATACAGCATTTCTTCTGTTAGAATAAACAGCTTTCAACACTTATTTACAATGAATGCACCTATTGGCCAGATCGGAAGA
>Locus_50331_112
ATTTCTTGACAACTATAAGAATGTAGTACATTGTACATATTCATATAGTTTTCTTCAACTGTATTTACACTGATGAGACACAGCCAAAAATAAGAACAGTTTACAAATACCA
>Locus_50330_108
TTTTGAAAATCGACATCAGTATGCTCATTCTCGTGTCTACAGGAGCGAACATTGGCTTTGCATCAGCTTAAACATGAAGGAGATCCACAGTTTGCTTGTGACCAATGT
>Locus_50329_81
AAAAAACAAACAAAGACAAGTTTTTTAGCCTAGATGAGAAATCATAAACTGTTTAGATATGAATGGAATGTCGAATGTAAA
>Locus_50328_84
ACGTAGTTGGAAATGTTAGTTGAATTTTCTCGTATTGATGATTCAACAGTATCAAATGTTTCATGATACACATTAGAAAATTAC
>Locus_50327_98
GATGAGTCAAAAAAATTGAGTCAATCAGCAGTGATATTTTCAATAAGGTGCAAGATAAATCTGTTGCTGCTCACTGTGATAAATAGTGTCTTGTTGTT
>Locus_50326_88
ATAGCTGCCTGCAACTAGACAATTTCATCGCTTCGAAGACCGCTGGGTTCAGTGGTGCTGATTTGACCGAAATTTGCCAAAGGGCGTG
>Locus_50325_93
CAAAAAATTACGACCGACCCGTGCCGTAGGGGATGAGGAGCTTGTTTTAGATGTTATTGGGTCTCCATCAATATCTGTTTCTCCTAATGGGAG
>Locus_50324_74
AGGACTATACAATAGTGACAGAGCAAGACTACAGAAATACCATATGGTGCTACTTCCTGATATGTTATCACTGT
>Locus_50323_119
TATAAACTACACGACGCATTAGCTTCAGGTCAGAGGTCACACTTTGGCAGAGTTGTGGCCAGGGTCCAATATGCTTAAAATGCTAAAATGTGCTTAAACCAGTGTTTACAATACTTTGT
>Locus_50322_157
AATACCGACAAAATAAAGAGTTTTATGAGCCAAACCTTGAGGATGCCTTGAACCCAGTATTTGATGGCCAGCTCATGAATGAAGATGAGTTTCACAACAAAATTCGAGCATCTCTGAGAGGGGAGGAAGTAGAGGGATTTGTATTTGACAAATTGTT
>Locus_50321_88
ATGGGTCTAATAGTTCGTAGGTTATTCCACGAACGATGTCCTCAGTTGGTGGCGCCCCAAATGCGAATCCTTCAACTCTTCTCCCCCT
>Locus_50320_97
GTAGGTCGATACCTAAGCATTGTTTGATCAGCCACATAGAAAATAGGCCAGCAAGGTCAAGCTAATCTTTTCAAAATCATCCTGCTTGATTTTTTAA
>Locus_50319_110
AAAAAAACCACACTGCTGTATTATGAGAGCTCCCAACGTTACTCGCAAACAGAGAACGACGGTCAAACGCGACACGAAAGGCGGCGACGACGAACGCAGTGCCTTGCGGA
>Locus_50318_112
CAAGCAAACATGTGTAGTATCACTTAGATATCCGTCGCACGGAAACGAGCTGCTTGTTCTCGAATACGTTTGTCATATTCGACTTTATCTTGCATGTAAATAGCATAAGCTT
>Locus_50317_162
GAAGGCTAGAGAGTTCTGTTAAAAAGGCATGACAATTAAGCCCCATCACAAGGACTTTGGAAAATTATTTAAACCCTCTCCGTGACACTTTTTTTTAAGACCCCTCTCACTAGAGTGTGAGGTAGTTTATGGACAGGCTTATACTTCAACAGCGAGCTGGCG
>Locus_50316_134
CCCATTAGTCAAATACGCTACAGTTATGATGCAAATAAACATCGTCTCTATGCTGTTAGTGGAAAAAGTGGAGAATATCCAGCATTGGGTTTTACCTTCAGTGTTCATCCGGAATCATTTGGACAATTGATTGC
>Locus_50315_109
TTAATAGTAAAATGTTTTTTTCCCTTTATTGCGCTTATCGTGGCTCCAACCGGAGTTTTATCGGTCATTGCCTTACACAGCTTTTTGATCATTTTGTGAGTCATTCCAG
>Locus_50314_112
TAGGCTGTGACCTTGTTCGCTATTTCTTCAGCTGCTTCAACAACTCTTTACACAGAATGTCTGTAACCCAAGAGCTGTTTATAGGAACAATGAACGCAAAGAGCAGAGTAAT
>Locus_50313_155
GCCAGTAGAGGAAGGAGGCGTGTCTCGTCCTCCAATCCCCTCAGGCCCTGCCTTTCAGCGTTCAACATTTCTGAAGCCAAGAATTCTGACGCCAAAAGATTTTGGTCATTTTGAAGGAGTGACCTCAAAAACTCATTGGCATCGTCGTATTGCCC
>Locus_50312_109
AAGAAGTTCTCGAAACACTACTCACACAAACTTCGTGCAGACTTGAGCATTTCTCCGTTGATCGATTTCTCCTGCCGGATCTCTTCCATAGAGAGTCCTTGGTGTTCTA
>Locus_50311_124
TGGGTAAGGTCAATCCCCACTAATAGAAACTCATTAAGTAATATAACACCAATGTGCCCTTCCGTCAGTGATGTACCATACAGACATTTAATAACAACACTATGCCTCCCAGTCAGGGGTCTAG
>Locus_50310_293
ATTTTTTTTACTATAGTTCATCAAGGCTGGGGATGTTACTAAAATACTTTCCACAATCAATTCATCAGTCATGTTACTCATGGTCATGTTTGAAAAGCTTGCATATGAGCTCGCAAACAAAAGCCCAAAATAAGGAGATCAAGCCTGTGTCTGATCTCTTCACTAACCCAGTAGAAAGGCTTCAGCCAATGCTGCAGGTTCCTATCATTCAGAACTCAGATGTTTGCTTCAGGCCAAGTAGGGACGAGATAGAAGCAGCCTCAATGTTGTTTGATCCTAAAAATGTCAAAGGA
>Locus_50309_100
CGGCTAGAGTTTCTACACGTCAAAAGGTCATGTTACAAAACGGAAAGAGGGAAGGATTGAGTTGTGCTTGGAATGTAGGCTACACGGGAGCATAAATTTC
>Locus_50308_116
CTCAGTCATACAGAGCACAGTGTCTGCCTGTTGTTCTTGGCAATGTCTTTCTCATAATCTGACCTGCTCCTGGCCACCGGACTTCTGGATCGACTTTTTTCTTGCTGTCGCTTTTT
>Locus_50307_83
CCGTTGATTAAAGGAAAATACGTCATATAAAAATATTTTCTAAAGACAAAAATGTCCATACTTTAAGGCAAAATAGCTTTGCG
>Locus_50306_176
AACGAACTAATTTCATAGACAATTTAAAGTAATTTTGTGCTGTATGATGGTACATAAGTTGTTAAAACTTACATTTTCAAGTGCCTTTTGATAAAATTAATAATGTTCATTGTCTGAATTGTGCTGAAATACTTTTTAACAGTGAGTGTTGTCATAAATATTTTTATTTTTTCTTT
>Locus_50305_194
GTCGGTGTCACAAAAGTACACCCCCAACAGCTCATCTACATCAGTTGATTTAAAGCAAATGCTGGAAACTCACTCAGTGCGCATTGAGAATCAAAGACGAAATGGACATTTCCAGTTATTAGAGGAGAAAGGCTGTCACAGTAATAGCAGCTTTAATGGTTTAGACAAGAATACTGATGTGTCCCAATCATTGA
>Locus_50304_110
CAAATAGGAAGTTACATAGTTTCAAATCAAACTTTTCCCAACACTAGTTTTCAAACGGGTTTTGCCAGCACACCTTCAAGTTCTCATAGATCTAATTTCAATACGTCTGG
>Locus_50303_80
AAGGGTTATTGGGGTTTCTTGTTAGTGCATAGAAAATCAGTAGTGCACTGTGCACTCAGCTCATTTCTGAGATCGGAAGA
>Locus_50302_113
ACATTCCACCCTACGAGTAGCGCAGAGTTGGGAAATCTGCTGTATCTTCCTTCATGAAGATTACCAGCACATTGTCAAAACCTGAGAGCTACATCAATAATATTATATTACCC
>Locus_50301_119
TATAGAGTAACTGATATTTATTAATGTTTACCGATGCAATTCATCTTATTTGTATAGATGTTGGTGTTTTAAGTTAAAATCTTTTCTTTTTAGCTAATTATGCATATGGTTATGGGCAA
>Locus_50300_102
GAACCCCTGAAACCTAAACTTGGGCTTGGCTTTAGATGGACGGTTGGCTCTTGTTTTAATGACCAGCTGATACACCTGAGTGATGCTTGGAATAAATTTGAG
>Locus_50299_82
AGATTAACGGAAAATAAGGTGTCTGGTCACTGCTTGTTCAGCACATACATGGCCTAACTGGATTATGGTCAGTGCTTGATTT
>Locus_50298_102
ATGTAGCACAAATGCCTCCTAATTTTCCATAATTCTAGATTTTTGTGTCGCTCGTAGTGAAAGTATTCAGGGAAATCAGTTCTTATTTTAAATGCAGAAAAA
>Locus_50297_129
GTTTTTCGACGTTTGGTCAATGAAAAAACTCGGCATGAATGACATCCGCGACATTGAGGAAGTCAACATGTTCAAGAATGATGGCAATATTTTGCATTTCAAAAATCCTAAAGTACAAGCCAATATTCA
>Locus_50296_114
CAGACGGTCTCTTGTAAAGTTTACGAAACGACATCATCTCTGAGATGCTATGATGGCCAGGGTAATGGATTTTGTGAACTTCATAAGGGCAAAGGATTCTGGTTTAGAGTCTGC
>Locus_50295_82
CTCACGCAAGAACTTGCAAAGAAAGATCGAGTTAGAGCATCCTCATCTCTAATCTGCGCGGTCTTTATCTTCTTGAATTCTT
>Locus_50294_91
TTACTTGTCGAGCCAGTAAATCCGCTACTATTTACCGATTCTTTCGGCGGTCCTCTTTCAACAAATAATGTATAATAACACTCTTTTTTTT
>Locus_50293_96
GAAAACCTATGGTGTAATAATTGGTCCATTAAAAAAAAGTGCCCCGGTCAACTGCACACCTGTTTTAAAATTTTCATTTAACAAGATTAACATTTT
>Locus_50292_94
GAAGGCTAGATTCTCTAACTGGGTTTCGTCAATGATATCCTCAGTTTCAGGATTAGGATCAACAGGGCAAGGTCCCTTGATCTTGGTCTTTATG
>Locus_50291_114
CTAAGTTTTTGTTTTGGACGTGGATTTCTTGCTATCAATGGTGAAGCTATGCGTATTAATGAGCGGATGTGTCAAACTGATGTGGATGGCTTAGTACTAAAAGTGAATTTTACT
>Locus_50290_92
TGTTCCTTGGACAAGAGTAGTTTTCAACAGAGAATGAACAACATTAACTATGTCCGCCTAGACAACTACATCATTCCTCTACGCAACTTTGC
>Locus_50289_79
TGTCAGTTTTTTTTTTATAATTCTAGATATTACGCTTTTATTGTTCAAAGTACCGCTAGGCAATTGGAAGGCATAAAAA
>Locus_50288_102
GCTAAACTATGTTTCCACTTGATTTACAACGAAGATAACACAAGATGGTCGTTGATTTAGCAGGATAACAAGGACAATTTACTAGGAAAACAGAGACAATTT
>Locus_50287_88
TGTCACTGCCATTACAGCAAAATCTTATTGTCACCATCTTTAACAAGCTTAGAGCAGGAAGTCGCATTTGCCGACTCCTTAAAATAAA
>Locus_50286_111
TAACTGGGGCTCAGAACATTTAGTAAAAGGAGAGGCCACCAACGAGCAATCCAAACAAAATGCAACCCAAAATGATGGCAACAAAAGCGGCACTGGAAAGTCCGCTTGACA
>Locus_50285_82
CACTATACAATCCCCCGTTAGGAATCTCTGATGAGTATCACATCATAAGGCATGTCATGAATCTAGAGGCAGTCAACACGTA
>Locus_50284_100
ACTCAGTCTTCTTGTTTGACAAGGACAGGTTGATTATTATTCAGACTCAAGCCTTTGAAATTCAACGGATTTACCGGGTGCCCCACATTTTGATACACGG
>Locus_50283_138
CGGCGGTTGTTCCGTAGTTACCCCTTGGATGTGCTCTTTGGCCAGAAGATCATTATGTGGATCGATCCAGGGTCAGTAACCGTGAAAGTCGGTAACGCCCCACCAGTGGACCTTTACCTTGAACCCGTCAACTCTGGC
>Locus_50282_72
TAACTGTCCGACCGATAATTAATCAAATATTCATGATTACTTTACTGTTTAAATTGACAGGCTGGCTATTAA
>Locus_50281_86
AACAAGTAACGGTAGGCCAGAATTAAGTTAATAAAACTAACTGCTTTGTTGGAATAAAAGAATTCGAAATGATTATGTGTAAACAT
>Locus_50280_179
CCTTCGTGTTTATACCGCCCCGTAAGGAATGAGACAGTCAAGGCAAGCACGTGAGGTCATCGATCACTGAGTGTTGGTCCGTTGCCGTAACGTCAGTGTGATTCTGTTTTCTCTTCAATGACAGGCATGTGTGTGGTCAAGTCTTTAATTCTAGACAGGTGCTCTCGACAACACACTGG
>Locus_50279_71
TACTGAAAGTTCGTGGACTACATCATTTTATGAAGATATTCCTGTAGACAACAGTATCAAGTAAGTCGGGG
>Locus_50278_84
ACTACCTCTACGATCTCTTACCAAGCCCAACCACATAGCAATGTACCAGGAACACTGTCAAATTGATTTGTACATAGGACTGAC
>Locus_50277_117
TTTCACCAGCCTCTACCTAGACGGACAAACACGTCAATCTCTGCGATCAGAAACATCAAACGGCAGACAGCTCGCTGCAACAACTGCACAGTGTATAGTATGATACGACGCTGACAG
>Locus_50276_245
TGCTGTACATTTTCGACTCCAGATAGTAGAGAAATTTCTAAGGCCTGATTCTGAAAATTATGTCACCCATGTAAATGGGAACCAAATCTCAGAGATAAAAGACATTATGGGCCAAAAGAAGTCATGTAAGGCTCTCTTTGATGATTGTGTCAAGTTAGTTCGAGAATACTTAAGCAAAGAACCATTTAATGATTTTTTAGAGAGTATGTACTTCATGCGGTTTATGCAGTGGAAATGGTTAGAAG
>Locus_50275_81
GATTTTCAATCGATAGCAAACTCCGGTCTCCACTGTGGCTGAATATTTCATCAACCACGAACAGGAAAGGTGAGGATAAGA
>Locus_50274_188
AACAGTACCCGATTGACGGTTGTACAAATCATGATGGAATTGACAAGTGCTTGTGACCGACAGGCTAACAGGTGCATGTCTGTGACAGATGACAAGTATGTGTCCTTTTACAAAATGCCTGATGAAATGTCAATGATAAGGTGATGGGAACTGTCATCAAATCTATTCCACGTGGGCCTCTGTTAATG
>Locus_50273_90
CTTGGAGGTAGTGAAACACGATCATCTTCAGATGACACTCCCTGGTCAACAGATGTGCTCACTGTCTCAGACATTATACGGAAATCTCGA
>Locus_50272_90
GGAGGGGTCAGGTGTTGGTATGCCAAGAATGAGCCTCTGTCAGTGAGAAGATCTCTGGCTTGTATCTCTGTTTGGCTATAAAAAAAAAAA
>Locus_50271_79
AAATCAAACCCAATTCAAATCACGGGGCAGACATTAAAGAAGAATTACTGACACTAATTCCATTGAAAAATACAACCAA
>Locus_50270_131
GACGAGACTTCCCGACAGTGGTCGGGTGTATGTGTCTGGACCGTCAGACCTCAGGTGAATAGGTTGATTTTTTAAAGTTGGAGGCAACTGTTTTCCTTACAAATAAAGATCGTGATCTGTGTTGTACAATG
>Locus_50269_94
AACATAGAGTGTCGTGAAGTCGCATTGCACCGACTGTCATGGATGGTGGGGATAAGGAGGGACAACCTAACAGGTACTGAAGGCATTGTAGAAA
>Locus_50268_99
TGCAGCTACAACTACAAGATGCATCATACACCTCTTGTTTGCCTTAGTATGTCACTAGTGTCGTGCCCTGAAATCCCCGCGTGAATTAAACCAACACTT
>Locus_50267_74
ATAAAAATAGAACAAATGTATGCTAATCCCACCAACATACAAAACTTCATTTCTGATTTTATGTTTGTTGTTTT
>Locus_50266_91
ACATCGTCCCTAAGACTCAAGTATACCTAGGACCCCATAACCAACCCAATACAAAAGATCTCTAAATACTAAATATAAGTTTTAAGTGCTA
>Locus_50265_123
CTAAAGATCTCAACACAGAAGAACCATTCAGTTATCACCAACAAGCACCGGGCCATGTGGCTATCTTACAATAATCGACCTGGGAAATACACCTCTCACTGCAAGAAATGTGTGGTCATAGAA
>Locus_50264_90
TGGACATGGCTACAACAAACTTTACGTTATGCAACTTAAAAACCCAGCACTACGAACAATTTCAAGATGTGTGTCTTGCTTACATTTTAT
>Locus_50263_95
AAGGCTAGAGCAATCACTTTATCTGAGGACAACGTAAATCCTAACCCAAAAACATGATTTCCTAAGTTAAAAGTTTCGCCCTGAGATCGGAAGAG
>Locus_50262_81
ATGAATAGTAAGGTTAAGTGTGTTATATCATTCCATTACAAATGCTTTATACACATTTTAAAAGTAAAGTTTTACTCATTA
>Locus_50261_136
GAAGTGACGGCTGTCTGTTTGATTTGGATGTGGAACCAAGCTTCACGTTTGCCGTAACAACAAATGCGTCACCCCAACTGTTACTGACTACGGACCAAGTTGTTTCGTTGATAGAGATGCTGGAGGTTCAGTACTC
>Locus_50260_336
AAACGTCTACTACCTTACTAGGAAAGTGGTTTTGATGATCTTACAATTGCTGAATACATCGTCTCTCTGTCATCTCTTACATGGGAAACCTTTTGTTCTGCAATCACAGAAAAGTATTTTCACCTTCTTTAGAGCCCATCAGTCCTTCAGTATCTATTTGATGCAATTAGTGGACCAACATCCCAAGAGTCATATTTTTCAACCAATTCACTGACAAGAAAACATACACAGTATGAGAAAAAAAGATCACCTCAATCAAAGCAAGTTGCTTCATCACCTAGCAACCAATACCAAAGTAGACATTATCAACATCATCAAATGCAATCAGACCCTACT
>Locus_50259_101
GCAGCCAGATGGACTGTGTCGACCAGTTCGGTATAGACATCAAAGTCAACACTTCCCGCCTTCATTCCATCATACAGGAAAAGTTGCTGCCACAGTTTGAG
>Locus_50258_108
AATTTACTGATCGCGTCACATATGATCACAAGAGGCATGAAATGAAATACACAAATAATACTGCTGCATTGTGAGTGTACAAACGGCTATTCACACAGGGATGTTGAC
>Locus_50257_150
TTTTTATTGGAAAAGATGTTAGTTTTGTTGATCACTAAAATCGTAAATAGATTTCTTCATGGATGGAAAACATGCCAGATTTCCTTAAAATGTTTTTAATAATATAGTTTAAGCAATATTTTTCGTGACGACTTAGAGTCCAAAATTTTT
>Locus_50256_144
TCACAACACGAGGATACAGATTAAATACATAATGGAACCAATATTATGAGAGAAGAGAAAACTGTATTTAAAATTTTGATTAGCTCAGGATTGTCTTGTAAGTAAAGAGTCATAAAAGCTAAGGGTGGATAAGTGAGATCGGAA
>Locus_50255_84
CTACTTTTTATATCCCGTTCCCAAAAACATGTGTTATAAATCATCTTTATTTCTCAAAGGCTTTTTGTTTTGGCCAATGTACAT
>Locus_50254_105
GCGGCTATACAAAATTGTAGAAGAAATGTGACATACAACATAGAGTGCAATGGTCTGCCAATACCTTTGACTCCGAAAGACTTAAAATCAGGATGAAAAAAAAAA
>Locus_50253_72
TTTGTGTAGTAGTGTTGTGATGGAATCTCCTTTATACCCCAAAAAATCCCAAGAAGTGGCAAGGGGCAGACC
>Locus_50252_120
CTCTACTGTGTCTACTTCGGTATCCTCATTCTATGTCCAAAAGCGTTACTCAAGTCATTTTCGGATATCAATGAACTCCCATTATCGTATCGACATTTAACGAAAGGAAGACAATTCGCA
>Locus_50251_259
AAACCTCGGTCATAGTAGTCATTATACCATTATTTGGGTTTACCAGATGAGGCTTATGTATTATACAAAAGTCAAAAGTGTAAGGAATTTTTCCTGGACAACACATGCCACAAAGTTCTCATGGACCTGCTGTACAATCACAAGCAGTATCAGAGAGTTCTGGATGTTTTTACTACATTACAAAAATTTAACATAGATTGCATCACACTGGCATTAGGTGCTCATTATCATATTAACACTGAAGAAAGTTTTGAAGCTG
>Locus_50250_191
TAAAACATGAGTTTTGTGGCTAAACTTTTACCGATTTTTATAAATATAATGTCTTAACAGAAAAAATCACTGAGTCAATTGATTTAGATGAGGCCGCAGGCTAGTTCAGCTTATAACACGGGCCTCATTTGGCCCAAAAGGCCTGACATTGAACAACCCTGCTTTAGGGTTAGGGTTAGTGTTAGGGTTAG
>Locus_50249_71
ATGCTAACTCAACGTCCAAATAAATATCGTGTTTACTCAGCTTCCCGGATGTACGATTGAGTTGCAGGTTT
>Locus_50248_245
GCTAGAAGAAGTATAAACAGTCCTTTCCCACTATCCCGACTATTTCTGCTACTAGATCGACCATCAATTTTTTTAACCACACTTCCCAAACTAGAACTGCCTTTGCTTTCATCTTCAGAATGTCTCGAGTCTTCCTCATCGCTGTGACTCCGCTTGTGTTTTTTCTTTTTCTTATGCTTATGCGTCCTGTCCTTTTCTTTGGATCGAGATCTTGAACGAGACTTATGAGATGTCTTATGACTTTT
>Locus_50247_86
GGGTTTAAATAGAAATTTCTTAATGCTTACTGCTGACATGAAATTACTAAATGATCTTATCATTAGTATCAAGTTGAGATCGGAAG
>Locus_50246_92
GACAATTGTTGAATCTTATATGATTTATTTCAACTTGTGAGGACAACACACAAACAATGTAATAGATAGCACACAATGTTATAGGCAACACA
>Locus_50245_86
TACCCACCTTTAGGATTAGGAACATTTGGCCAAGTTGTTGGAGGTGATCCTGGCGTTGGAGGTTTTCCGAATCCTGGAGGTTTTCC
>Locus_50244_104
TATTGAGACAGGTAGTGAGACGTCTTACATCAGAGCTTGTGATAATAATTTCGGGCTATAACTGCAGGAGAACAGTCCAGCCGCTGTCATGCAAAACCGTTTCT
>Locus_50243_74
TTTTTTCAATGTAAATAAATCAGGACATTATCGAATTTGCTTTAGAAAGAGTTTTAGAAATCTGCAGATCGGAA
>Locus_50242_148
ACTTCTGCTCGAGCAGCGACGCGTTGACCGATGTGAACACGGAAGACAAGTCCGGCTTGGGCAAGATCATCGAAGCCGTGAAGACGAACTTCAACGATCGGTACGACGAACTGCGCCGTCACTGGGGCGGCGGTGTGCTCGGCAACAA
>Locus_50241_81
TATTTAGAGTCGGAAAGATTATGACAAAAGCAGCAAAAGTGCATGTCATTCTCTTTGTGAATGTTTTAAAGAATAGATCAT
>Locus_50240_107
AAAAAAAATTTTACGTATAAATTAATGATGATTTAAATAATGCTTTTGTTTCTTTTCATTGGGTTTGCTCCCTTTGAATTGTCATTGTTCGCTCAAATGCTGTCTTG
>Locus_50239_77
TGCTACAGAACAATTAAGACGCTTGCTGTCCTTCTTTTTAAAAAAATGAGACAAGACAGGAGTTCCCTGGGCTGCTG
>Locus_50238_105
GAGAAGGCTAGAATCCTTGTAAATTTATGGTACACACTACTCTAGCCACACTTGGTCAGCACATGAGTTCAATTTTAAACTAACACAGCTAGAACTAGAAGCACA
>Locus_50237_88
ACAACTACTAGCTCACTGTAATCAAAATCAAATCTATAAATGTCTTCAACAACATGTTTCATTAGCCAGTTGGGATCCAGCGGATACT
>Locus_50236_118
GTCTCCGACACCCGACTACTCTACTTGGGTGTTCATACACCTGAGGACAATGCATACCTACACTTCCAACAGGCTGAGTCATACTAACTAAAGCACCCATAGTTTGAGATCCATGAGG
>Locus_50235_157
GAAAATGGGCTAACCCAGAGCTTAAAGCGTGGACACCCTCAATGTGATACGGACAAGCGAGTTTCGTGTATCAGAACTTTGTAAAATTTCTCAATCATCGTCTATCGCAGTACTACTCGTGTTATAGGATAAACTATTTTCTTGTAATTAAAACAAA
>Locus_50234_76
TCCACTCCATCGTATACGACCTATGCCATGGCTTATGATATGCGTCCAGGTGCTGTAGGTGAGGTAGCATATGCTG
>Locus_50233_112
CAAGACCCGATAACCTTGATCTCTGTAAATGTTACAGCTTCAACTTATGCAGGCAACTCTACATCTGACTTATTCAATAATATAACAGTCCTAAATACACCTGGACAGCCCA
>Locus_50232_93
GAATCCATCTGGTGTGAGAAAACCTGGATGGGCCCCCCTGGCAGTGACCAAAGGGAGACAAATTCAAGCCTTTACTCTTCCGATAATGTCTGT
>Locus_50231_141
TTAATACATATAACTATACTTAAAATGGATCAACTGTTGGTACACATTAATTGTGGGTCGTCAGATGATAGTAGCCTGCCCTTGAGTACAAATATGTACATATGTCAAAATGGTGCAAGTAAGTACATCTATTGTCAAAAT
>Locus_50230_74
GTTTTAGTATACCGGTATTATACCATAAGATTTTTTGTTATGAATGGTTACACCATGATCAACTGGTTGTTTAA
>Locus_50229_128
ACCAAAAAGGCACTAACAAATCTGACAGTATATTTTTAAAAATTCACTTTAAAATTGCAATAATGTATTAAATGGAGAGCTAAGAATTAGCAATGTTCAACACGAAATTTCGTTTTCTTATGATTACC
>Locus_50228_99
TTTAAGTCCCATGTCACATTATGGCATGGCACCTAATGCAGCAGCACCAAGCCCACTTGGTCAAATGCCTCCGCAAGATGGGATGCCAGGTGGTCCTAT
>Locus_50227_114
CTAATCCCAATGCTAATCCCTTAAGACTAACTTGGATTAGGATCACGATTAGGGTTAAGACTATGTTTGGGTTTAGGACTAAGATTATGATTACGATTAGGGTTACGATTAGGG
>Locus_50226_183
CAGTTTACGTTCGACTAGAAGCTCCCAATCAAGATGGCTTCCACTGGAGAAAAATTAAACTTATTGTCGATCAGACTGAAGGAAGACAAGCAATTACCTCATTCTATGGTGTCGACATGACCAGAGACGAGCTCAGCTCCCTCATCAAGAAGAGAAAAACTCTTATCGAAGCCATCCAAGACG
>Locus_50225_78
TATTTCCGGCAGTCTACATTGCAGTTCCAAATCCACTCTTCCCATCTGCCATTTAGTATCTGGCTGTCTGTCCGCCCA
>Locus_50224_127
GGTGACTATGGTAGTAGTTCCAAATTCCTCGTGTCTTGGGTCCTCAATTGAACAAGATGAACAAGTTCCCTTCCCCGATCACTCACAACGATAACATCAAGGAGAAGATCGCTGACATCAGCTCTAC
>Locus_50223_104
GAGAAGGCTAGACTACTAAAAAACAAAGCGAGATTGGCAAATAATCTAGTGATACAAACAAGGCAGTCAAAAGATTTCTTGACCCTGGAAAACAGATCGGAAGA
>Locus_50222_73
GAAACTTTTTTGAACACCCTAAATGCTGATGAAAATGTAAATCTGTTGCGATTGAAATTAGGTTTGTGTATAA
>Locus_50221_128
GAACAGGAACGTATATTATATTTGTGGCAATGATATGAAGATAAACAACATGTCTCTGAATGAAGATTACAACGGTACAGCTACACACAAGTCCAATAACAGCTTAGATCCCACTTTGACACTTAGTT
>Locus_50220_108
TAGCTCGTATAGTTCCTGTCGTAAAAAAGGACGAACTCAAGAAGAGTCAATTAGAAAAGGTAGACAATAGCATATCTCGGAGTCACCAACGCCACAACCGTGTTCGCC
>Locus_50219_134
GAAATGCTCTAAAAGAAACTCTGGGACTCTTTTTTGGCGAACGACTTTGTAGATGATGTTTAGGAATCCAATCAGGATCATAACTGCCTTTGGCTTGTTGACCAGCGAGGTAATTTTGTGAACCTGATTTACCG
>Locus_50218_100
TGTCATAACGAAAATAATTTATGCAAGGTAGGGTTTTCTGGGAAATCAAATTGAAACCAAAGTAGGTTGAAAAAATTCAAGTCCACAATGCTATGATTTT
>Locus_50217_130
ATTTAGTAGAAAAACACCGTACAAATTCATTCCTATTTATTGTCAACAGGTGGTCAAGATGCTCGTGTTTGTAGTCATCTTGTTCGCTATGTGCTGGGGTCCCATCATGTTTAACAACGTCCTGGTGTCC
>Locus_50216_79
GAAGGCTAGAAAAAATACGGGCAGTGCTTTATTCATCCCAAGTGCTCACAAGAAGAAATTAATATTCTTCAAAAAATTT
>Locus_50215_84
AAAAAATGGTACAAGGGTAAGAATGTTTTAAATGTTAACAAATTTGAAAATGTCTATTTTTAAATTTTAGTTTGATCACTGCAA
>Locus_50214_111
AATGTGGGAGGGTTTTCGTACAATAGGAAGTCAATTAAACCAATCATTGTACTTGGTCATTCTTTATGTAGGTCAACCCAGTCATGTTAAATTACCGGGTTACTCTGTGTG
>Locus_50213_72
GGGCGGTACGAATTAGCCACAGTCAAAAAATATTTTGATGTTGACAGAAAAAAGCACATTCAGTGGTCCTGG
>Locus_50212_121
CGGCGGTGGCGACGGAAGGAGTAACCAACAAGTTCAGTTCTCTTTGGTGTGCTGTTCTGTCGTGTTCCGTACACCACTGCCAAGATTACACCAGTGGCCACCAGCAGGGATGCCGCTCCTG
>Locus_50211_136
TTTTATTGTTTTTTGTTGCTTATGCCTAACTATTTCTGACCTCTCCACTGTTCACACCACAACAATTAGGATTTAGGCCAAATTTAGGGGGCAGGAATTTGACCACCAATGTTACCAAAAAAAAGAAAATTTATTT
>Locus_50210_94
AAACTTAAACAATCCGTTAGTAGGCACTAGTTGGACACCAGCCTGAGCAGTGCTCAATTTCTGGTTTTAAATTGAAAGTAAAAACAGATCGGAA
>Locus_50209_110
TTCCACCGATTAGATCGCGCAAACTACGATCTGCACTAGTCTCAAGAAAAATTAAGGAGATGGGATGCTTCAAATGGAGTGTCAAGAATTTCTTTGAAACGGTTACGACA
>Locus_50208_86
AGGAGCATCAACTAGACCGGGTCTCCATCAACGTCAGCCTCACGGATCATTTCGTCGACTTCGCTCTCGGTCAGCTTCTCACCGAG
>Locus_50207_123
TCTTGATAAAGTGACAGAAGTTGCGGCACTTGTGGCTATGCGAGCGTCAGAATCTCAGACATGAGGTCACGCGGTCAGCTATTTCCGGTCATTGTGTTAAGAGATGTACTCAGCTGTGCGTCT
>Locus_50206_79
TTTTTTGTTCTGGTCTGATCAGAAAAAATGGATCAAGAGCCGCCTGAGCATGCAACGAAATTGCGCCAGATCGGAAGAG
>Locus_50205_71
ATACTCTCGACGTGGGAATGAAGAATTAAAAAGACCACAATGAAAATTTATAGTCAGTCCCTTCAAGACAA
>Locus_50204_82
TTCTGACGTCTGCTGTCGCCAAATCCCCAGAAACGGATTCAGAATTAGTGCTAGGCACGCCAAGGGAATGTAATGAGGTGAA
>Locus_50203_72
GAAGGCTAGAAATTGTAGCTTGGGAATAACTGAAGAACAATTTCAAGAGATTCTTCAAAGTTTGAATCTAAC
>Locus_50202_143
TGTTACATCGGCTTGACTGCCGACGGCAGTAGGTTGTTGGCCCACTTGTCCATGTCGCCGATGGCCACATCGAAGCGGGGGCTGATTACGCCGCACTTGTTGAGGCGNNNNNNNNNNNNNNNNNNNNNNNNGCCGGCGCGGTG
>Locus_50201_102
GTCGAGCATACGTTAGTTGAACCATTCACCTCGGTTGCCTCTCGAACCGTACATTTATAGCCCGCTATTCTCTCAGTCCTTTACCAGGCACGCTTACAGTTC
>Locus_50200_175
GATTGTGACTCAGCAGACTAGATGAACAAGTGGCTTACTTGCCGTTAGTTGACTGTGAGGGGAAACTTCTCCAGATGCATTTTATCTCAGGGTCTGAAATCGGCAGGGAAGAATCTGTACTCAGAGAATGGTTGCACTGTCAAAAAACCAAAGGTGGATTACTGGTAGCCACTCA
>Locus_50199_220
TGTCGTGCTTTATACGGTTGGAATAATCAAGGTGTATTTTCAAGTTCAATCGTCGTTCCTGGGCAAGAACCATTAACACCTGCTGGCCTTGCTAATGCTACACCACAAGAACAAAAACAAATGTTAGGTGAACGTTTGTTCCCTTTGATTCAACAAATGCAACCAGAATTGGCGGGGAAAATAAACTGGATTCTTCTTGGAAACCAAAAAAACCAACCTT
>Locus_50198_113
AAACAAAAAAGAGGACTGAATAATAATAAATCTGATAGACGATATTTTTTATTAAAATTATCGAAAGGTATAATCAAGATCTGCTTAGGTAGAACAAAGATACAGTGTTTGAT
>Locus_50197_97
AGTGGCGAGTCCAGTAGCAGCTCAACCACCCTGGTGAGATCTGCGCCGGATACACTCCAGTCTTGGATTGCCACACCGCTCACATTGCCTGCAAGTT
>Locus_50196_93
GACGAAGTTTACACCGTAAACGTAGTGCTACAGGTTCTACTGACATTCAAGGTTTAGTATTATAAAATATATGTTTTTAATCCATCAAAAGAT
>Locus_50195_125
GAAATTGTACTGATCATTCTTCAGATTCCTCATGGAACATTTCTCTGATTGATTCAATACCACCTGGAATCTCATCATCACTAAATGCTTCATTGTCACCATCATCTTTCACAACTTCCAGTTTT
>Locus_50194_98
GGGGATACAGAAATTCAAGTTTGCTAAGATATAAGAATGACTGCGTAGCTCGACATGTTCAGTCGAGATGTTTGTATTTAAATTTAGATGTCTACAAA
>Locus_50193_92
CATTGAATTCGGAACCTCAGTTCCTTGAAGGACATGATTTGTTGAACGCCCATAGCAGATTGGACGGCAACAACCAAAGCCTTGCCAGAGGC
>Locus_50192_79
GAAGGCTAGACGATCAGAAAATGACAATTAATCGTGTCATAATGCTGTGTATTTCAATTAAACTACAATGAACTCAGTG
>Locus_50191_75
AGGCTAGATTCTTTAAGTCGTCAAGAGTTAAGGATTCTTAAACTGTTGAATTATACATTAAAATCAAGATCGGAA
>Locus_50190_84
ACTTTATAAACCGATTTAGTTAAAATTGTACAAGGTAAATATAGATATATAAAACCCAAACAGGTTAGTGGTAACTTGCTGACA
>Locus_50189_77
AAGGCTAGAAGTTTTAACTTGTCTGTGATTATCATTAAATGTTTTAAGTGAAATCCTATATTTTGTTTCCCTGTCCA
>Locus_50188_157
TTTTTATCATATAGAACTAAAATTATGATTTCATTACAAGTGGCATAAACAAAACAGAATTAGCTTTCAATGAGATGAAAGTTTGCAACAACAAAAATTATTTTAATTCAAATGGTGCGTTTCCCCATTGTGGGTGGCATGGGTTTTCAGCATTGCC
>Locus_50187_96
CTCACACCTCTACCCGGCTAAAGACACCAGCAAATCTTAGCGCCATGTGGTATACTGGTGAACCAAATAACGAATTTGACGAGGACTGCTCTGAGA
>Locus_50186_136
TCTAAGCTAAGTATTTCGGTATGGATGGTGATTTGAATGGATATTTCTCGGGTAGGTCAACTCTAATATTCCACACTCCACCTTCGTAAGGAGTTTCACGTGGACCAGCAAACTTAACCATAAATTCATTGAGACC
>Locus_50185_169
GTAAGTAACTGTAAATTTGTACTTTGTGCCCATCAAGAACTAAGTGGTCAGCAAAGCTGGCAATAAAATCTTGCTTTCAATTGCTCTTCTTCTTGGTCTCGATGACAAAAATCAGATCAAAGCAGAGGACTCCAACACAACATAACAGATATTAGCATCATCAGCTCAA
>Locus_50184_176
GTTATCTTCCGCATTGAAGATAAATCACTGCATGAAAAGCCAGAGAGGGTCAGTAGTAGCTTTTCAGGCAGTGGCAAGTTTGATCACAATGTCATACAGCATTGTTGTCTGTGTTGTGTCCCCATTCAGGGGATCTATCAAGAATTTATATAAAGTATACACCTAAACTCAACACA
>Locus_50183_73
GTCTTTGTCTCCCGAATCGTAATCTGTGTATGAAAACCCTCAGTCAAAACTTTTCTTCAAGTGGGAGATTTTT
>Locus_50182_107
TAAGCCGTCGTCGGAGGAGCACCTTGGCCTCCTTACCAGGCTTGACCTTCTTGACTCCTCCACCAGCAGCGGCTTTCTTCTCACCGCCTTCAACAGTGGCGGCTTTC
>Locus_50181_88
TCTAGTCTCTTTTAACCGAAACATCCTGTCGACTGCCATCGGAGAGTCCAGCTTGAGACCTGTCAGAGAAAACAGATGCGACCCAGGC
>Locus_50180_83
CAGACATATACACCAAAGACAGTGCTGTCAACTAATGTGAGTTTTATGTTGAGCTGGAATAACCAGAATTACCCTGTTAAGAT
>Locus_50179_76
TTTGATAAAACCGAGTGACTAGCCTTGTTCAAATAAAACTGGTGAGTGAGCTTTGATTGCCCTACTCCATTATTGA
>Locus_50178_97
GCAACAACAACAAACCCAATAGTGCCACATCAAGCCTCACATAGCTATCTTTTTACAAGGCAATGTGTGCTGTTTTTAAAAATGTTAACTGGTAGAA
>Locus_50177_118
CTACCTTAATCTCAAAAAAAAAAGAATACGGGCCCTATGTCCGAATAGCCACAGAATTCTGGGGATAACATTCAATGTTATTCGCAGAATTCTCGGGACAACGCTGAAGATCGGAAGA
>Locus_50176_87
CACAACTACGGTAGGTGTATGCCACTATTTTTGAGGATTGTATAGATCAGTTGGCTACACTTGGTAGGATTATGCCAACAACGTTTG
>Locus_50175_138
GAATTTCTTTACCGACATTTTGATCAACAAGCTGTTGAGAATTGTATAGAGAATGGTGATCTGTGCAAGCTTTTGCGTCTCCCAGAAGTGCTGGATGATTTTTCAGAGGCCAGCATTATCAAGAGCATAGAATGGCTG
>Locus_50174_72
AGAGGAACTGAGCCCCGATTCGTTCTGGTTATCTCTTCTTGACTCGGGGTTAAAGTTCTGGTTATTTCTCCT
>Locus_50173_105
AATTTAACGATAGCAGTTATTGTTTTCATTTCCGTATGCGTGTGCATAAAGTGTTTTTGTATGAATATGATTAATCCCTGGTTGCCATTACATGTATGTGGTTGA
>Locus_50172_167
AAATACAATTTAAAAAAAACGAGAAGTTAAAAGTTGTCATTTTTAAAACAAGCTTTAGTTGGCTTAAATATGTTACAATATATTAGGAGTTAGATGATAACTAACAACTCTAGAATAAAAGTAAGTTGATGGAAGAACTCATGAACATGTTTCCTGAGAGTAGTCGC
>Locus_50171_105
AATAAAGTTGTGTCAAGAGTGCAGCATGGAATAAATCGTGGCCTGTAGTTGTTGTTTTTTTGTGAGTGGTTTAACACTAAATAGTTCTTCGTTAAGCTCGAAACG
>Locus_50170_92
TGAATAAAGGGAAGTAAAAATGAATCTAATTTTAATACACATTTTTTTACAATATGATACAATTTTAAATAGGCGTATTTGTCTTTATATTT
>Locus_50169_75
CTTGAACCGACATGGACCCATTGTTTGGGCCCCCGATGATATATCCACAATGTCTGAACTTGGCTGTACCTGGGT
>Locus_50168_76
TAGAGTTTACAAATGTTGTACATTGCTCCAACCTTCTCAAACTATCAGCATTGCTGAGTTTGATGATGAACATATT
>Locus_50167_92
GAAGTTTGTCAGAGAGTACTAGATGACGTCTAACTGTGTAAGTGCTGACAGGTGAGGGGTTAACTGGTGTGAAAACATGACTTATTATGGAT
>Locus_50166_140
TTTAACGTAAAAAAATACTCGTTGATTTTATTTTAGTGTAAATACAAGTGCAATGTCCTTGTTTTTAATGATAGGTGTATTTATAAGCTTTGGTTTTCATCGTGTTGATCTTGGCTCCATCCTTTTTTAAAAAACAGTCT
>Locus_50165_115
CCCTTTAAGCACTCGATGATCATTGCAAGTTTAACCCTTGGGGGTCTTACAAGTTTACCTTCGTCAATGAATGCTATTACTATTATCGATTGTGCAATGTCCGAGCTCGCTTGTC
>Locus_50164_104
ATCCATTTTTAGCACTTTTACAAATAAAGACGTTTAGAGAATTGAAATAATTTAGACGATTTGTTTACAGAAAGTCGCGGTTAAAAATGAGGTACCAGATCGGA
>Locus_50163_94
TCAGTCTAAAGTCGTCGTTGGTGAGTTAAGTTATTCATATGTTGTTGAGATTATTGTAATGATTTGACTTTGAAGTTGTTGTCATTTTGTGATT
>Locus_50162_104
GGAGACCAAGTCTTGACTATGGTCCACACACTCGATAAGACGACGACTAGGTAACGAAAGTCAGCTCGAGCTTGTAAAAGCTAAAGCACACCACAATTTAGGAA
>Locus_50161_82
AAAGATTCAATTATAGATGATTCACTTTCAAGCTTATTCTAGTAATACAGTGGTTCTGAACCTGGGTGGGGGGAGGTTTGGG
>Locus_50160_79
AGTCGCGATTTAATTATTTCTCGAATGGAATTGAAGTTTCAAGCAACAAAATCTCTTACCCTCAAACTATAAAAATTGA
>Locus_50159_102
ACCAATAGCTGACTGATGTCAATAGCTACACATTTCTACCTTTATTATTGTTATATACACACCTCATTTTGAAACTGTAATATTCACCTTCTTCCCAAATTT
>Locus_50158_101
AGATAGTAAGAACCCACAGGTGGTACTTGGTGGCGCTGTGAATGATGTATTTGTTGTCGCTGTAATCGGTGTTGCTGTGATTGATGTTGTATTTGTTGTCG
>Locus_50157_103
CAGTGTCGTTTACAACCCAGTATTTTTGAAGAGCCAGAAACTATGTTCCCATCCTGGTTGAAGGCATTCTACCAGAGTCTACAGTCTCCAGATCGGGAGAGCG
>Locus_50156_130
ATGACCTATAGTTAAAGCTTATGCTGTCATGAGGCATTTTAAAAATCAGCAATGTACCAGAATGATAACAGTCAAGCAGAAGTAAACAAATTGAAAACTATCAGACATGCACAGAGAAAGACAATCAAAA
>Locus_50155_120
GTTTCTTTTAGATGCTTTTATATATCATGGAAAAAAATACAAACCCAAAGATTTACGTCAACGAAAAACACGTGCTATTCGTCGATTATTAACACCGAAAGAAAAATCCGTTCAATTGAA
>Locus_50154_370
AGCAACGGAAAAACTTCAAGTGTCCGACGGAGAAGACTTCATGAATAAGATCTTCCATACAGATAATATCTTGTTTTCCCAAAGCTTTTTCAATCACACTGTTATCCGATAAGGGAATACGTTGTTTGTTCACTTTTCCAAAACCACGTTTGTAAACAAGTTCACGAATAGATTTCAAATTCGGATAACCCCAAGCAATGTAGGGTTCAGCAATACGTAACATTTGCAATGTCGCTTTGTTCAATTTAACAAAAACACCGTTGTTAATTTGACGTAAACGAAACAAACGTAGAACTTGTTTCACACGTGGATGGACACCACGAATACCACGAATACGAATGACGAAAGCAAGCGATGGTTCGGCTTCGAC
>Locus_50153_184
ACAAGCTCCAGACACCGACCTCAGGGAATCTGTGCGAAAGCATGTAAGTTTGGTAGTATGGGTTGATCATCTCTGGGGCAACGAAGAGCGAACTCACTGTGTAGACTACACCAGTTCGTACAACCTTCCGGAAGGCTCCTCTTGACAACCAAAGGCTGAGGACAGAAAGGCCGATGACTGGAAC
>Locus_50152_72
GACAAGGTTCCGCAACTTTATTTTTCCCTTTGTAATTATAGAAGGCATAGCCTTCAGGTCTGAGATCGGAAG
>Locus_50151_151
TTCGTCAGACCTCAAACGTTAATGTTCAAATCTCAAACAGCACAATTTTGGGAACTTGCACATTTAAGATTTCAAATTCTAAAAGTTTTGAACTCATCCCTGTAGTTATTGATGTAGTTATACATTACAATACTGTCGACACAAGATTCGG
>Locus_50150_105
CAAAAAAGAATGAAAAGAAACATTTCGTCCAACAGTAAGTCAAAGTGCTGACATCATAACTTTCTTACTTGATCTTGAGGTGTCATATGAGTCCTGCACAATTGC
>Locus_50149_85
CAAACGAGGTAGTTTCAGCGAAACGTGGAATGCTTGAAAATGATCTTCTTCTGAGTAATTTCGCTGCGAAATATCTTCCAGCGAT
>Locus_50148_76
TTCGACCTCTCTTTAGTCTTCCTGCTTCAACTGTGAGCGGAGGGGCGTCCTCAGCCATGGAGAAAATATCTTCTAT
>Locus_50147_118
CGATGTGGGTTGAACCGGCAGAGACTGAGACCACTCGTGATACTCTTGAAGCTTTCTGGCTCTATCAACCGTGCCACAAGGCAGCCGAAACTTGACACACACGCTATCAGTAGGAACG
>Locus_50146_117
TTTTCCTTCTTAGTTTTCCTAACACCAAATACATTTCCAAGATTCAAGAATACCGTGAAAAGATCGAAGGAGAACTCTCCAACATCTGCAAAGATATTATTAAAATCTTAGAAGGAA
>Locus_50145_155
CTCTACCATTACAACCTCTAAGTAATGTTTAACTCAAATACGTTTTTTTGTTATGGCTGGAGCAAGCACAGGTCTGGGGTCGGGCAGTTGAAAACCACTGGTGTAATTGTAATTGACTCATGTTTAAGTTGGATCACTGGTGCTTTAGCCTAACC
>Locus_50144_78
GATGGTTTCCTTTGTATCTAACATTAGAACAACTTGACTTCTACTGTGAAGTCTGGTAGCACAACATGTTCTGTATGG
>Locus_50143_244
TTTGAGAGAAGTATACAAAGCAATCTTGGTGCGTGGTTTGTCCTGACCGGATGCAGAAACTGTATGATGGGTCATTTTCTGTTCCAACCAGAACTAGAGGTGGTACAAGGCTGACCACTCGGACTGAGGAGAATGACAGAATTCATGAAACAATGATATCGTGTCCCATGTCTCATAGTGCACTACTACTTGAGACAGAAGTTTAAGACAGTCTTCATTGGCATTAGTCAGATATACGTGTAGT
>Locus_50142_99
CGAATCAATTTCCTTCGTCAAAATAAATGTAATCTTGATCAAATTGTTTACCACAAATATAAATATTTTAAATATCTTTAAATAAAGCTTTATTTTTTT
>Locus_50141_104
CCTTACACAGTTCAAAATAGACTTATAGTTTTGTGTACATATGATCAAACAAACAAAAAAACAATATACAAATTGATTAGGAATAAAGGAAATGCACATAGCTA
>Locus_50140_76
ATAAGTCCGACATAGATCTCCCGTGGTAGCAAGACATGTAGTAACTTAGAGCCTTTTAAAGCACAAAAAAAAAAAA
>Locus_50139_100
CGGGTAACACTGTTTTTACCCATTCAACACATTACTTTTCAGGGAATCATTGAGACACCCCCTGGTGACCATGCCCATGCTGTAGCTCACCTGTGGAATC
>Locus_50138_86
ATTAATCAACATAAATTATACTTGAACAAAAAGAAAACTTTAAATATATATTTTAACATTTTTAAATACAGTAGAACCCGGTTAAG
>Locus_50137_110
GGTGTCCCGCTAGAAACCCCCGGATGGTGTCTTGCCCTTGCGGATGGCTTCGTCGTGGAGCGCATTATGTTCGTACGCTGGAAGCAGCTTCTCCTTCAGGTAGTATTCGG
>Locus_50136_96
TGGTATTTGATGTTCGAGTTTTTAAAACAAGCAGCTTGTAGAAATGGCTACATTACTTTTTATCTTGCAACTCAGCCTGTACTTTCCAAAAGAAAC
>Locus_50135_136
GTCGGAGTAGTAATGTTTGTCAACTCAATATTTTACATTGTTCTGAGTTTTGGACATACTCTTTAACATGTTATATGAAATAAGCATCAACTATTCAGACAAGAGTCAAACGGTTCACCAACAAAACGGCTCCGAC
>Locus_50134_110
TGTCTATACGAGGTTCCCAGCTCCTGCTAAAGGGACCATCAGCTTACAGTTTATCTGTAAGTGTTAAGATAGTTATTTGTATTGCTAGAATCCAACATTGTAATTATTCA
>Locus_50133_79
GACATAGAAAAAAAAGTCTAGTGGTACAATCTTGACCAATAAGTTCAGCTCGTTTTAGAATTTCTAACAAGGCTGTTGC
>Locus_50132_145
GTGTTAATTCGTTGGTTATCCAACTGATCAGAATCAATAGTGTCCCAATATACAACAGTCTGATTCATTGTTGTTTGAGGTCAACAATTCGGCACGAGAGCAATACTGTGAATTCATTCTGTGGCTTATATTGTCTGGTTTTTTT
>Locus_50131_139
AAAAGAAAAAGTACCTTCTACAATGTTCAATATGTGTGGAGTTGTTGCCTTCTTTAATGCATTCGATAATCACCGTGATATTTCGTTTGAGTATTTTGTCCTTGTGTGACAAAATCAATTTCGAAATCCAAATCACGAT
>Locus_50130_164
ACTATTGTGATAACGGCAGATGACGAGCATAGTCGGGTAAACTTGTTTCATGAGCGTATTTGCCCCATGTAACAGTGTATTGTTCGGTACCTTTAACACGGCATGTCAACGTTGCTTTTTCACCTCGACTGAGTGTGGCATCAGTGGGTTCAACAGTGACTTCG
>Locus_50129_158
ATAGCGAAGAGTGGGTAGATTCTGAAGATCAAAGATGAGTACCGTCGTAACCGTCCCGTCAGCTCCAAGTACTGCAAACAAACCGACGAAATGCTGTTCGTCGCACGCACGTACTTGACTTACTTGGAAAGCTTGCGTGAGCGCAAGACCATCCATTC
>Locus_50128_131
TTAAAATGGAGATTTGGAAGTTAAACTGTTGTTGTAAATAAGGCTGTTTAGGTCTGAATGCCATATTTTCATTATGTGATTTCTATTATTGTGATCCTATATTTCATTTTTCCCATTGATCAAAGAGCAAG
>Locus_50127_115
TAGTTTAAATCGTAGAGTTGTTCAATCACTTCTATCATCGTCGTCTTCCGGTTCATCAAATTTGCTTAGCTTATTAACAGGATCAAACTCTAATGGATTAAATCTCTCGCAAATC
>Locus_50126_119
GAAGGCTAGAACAATTTTCTTGAAAAGCAAATTCTTTTAGATGCTTATAAAGAAATATCTGATCAAGTGCGGCGTATTATCAGCCAAGCCAGAGAAAATATTCAAGTCAGAGATCGGAA
>Locus_50125_74
GAAGGCTAGAACTTTTTTATTTCTTTATGTGGCTATCCACACATTATAGAAGGAAAAAAAAAGTCACTCTCTGT
>Locus_50124_109
CGACGTCTCTTACTTGTTTTTACAAAATCCAAGTGGTCATAGCTCTGTTAATTCTGCCATTGTTGATTACAATCCAACAAGCCCTGTAGTACTTCAAAGGAAAATAACT
>Locus_50123_92
AGGCTAGAAAATGTAAATAGTGCTATCACATTTGCTTTAATATGAATCGATCAATGTGTGTCTCAACAGTTTCTAATGTTTTCAAGACTGCC
>Locus_50122_101
CCGGTTGTATTTTTTTAACGACAAAGTTAAATGAGTCAAATTGACAACTCATCACATATAATAATAACGTTCACACTAGCCATTGTAAAAAAATATGTCTG
>Locus_50121_199
TACCTTAGAGTAGAAGCCTCAGACTCGGACTGTCGTTGCTGGGAGATTCAATGCGGCTCAGCATTTGCTCCCACTTATCGATTCGAGACGAGTACAAGCGAAGTTGAGAGCGAGCTGCGTCCATTCCCTTTGAAAACTGTTCGCTTGATTTCTTATCTTCTTCGGTCAAGGCCCTGAACGCGTCCTGCAGTTTTTTTTT
>Locus_50120_116
TGGCGAATGGAGCTTACATTCAGGAAGGAATCACTAGACCATGTCAATAATAAAATTGCATTCCGCAGTTTACATAATAATATTCGCTAAACACAAATACTCATCAAATTGAAGAA
>Locus_50119_347
GACGCTCCAGCTACTTCTAAACATACAGGATAAGTTCAACCTGACTGGTCTCAATGAACAAGTGCCGCACTATCGGCAAGCACTGGATATGATCCTGGATCTGGAGCCCGACGATGATCTGGACAACCAAGACAACCCGAATCAGTCGGATCTCATTGAACAGGCTGCCGAAATGCTCTATGGTCTCATTCATGCGCGGTACATCCTGACGAACAACGGCATTGCCCAAATGCTCGAGAAGTTTCAAAACGGCGACTTCGGGCTCTGTCCTCGCATCTACTGCGACAATCAGCCCATGCTACCGATTGGTCTATCGGAGGTTCCTGGCGAGGCGATGGTCAAGCTCT
>Locus_50118_103
TTACCCATTATTAATATTACCTTTCTATTTGGTATCATTTACCGGTGCAAACTTTTGACCAATTTGTTATTCTTAAATTGTTTAGTTCATAAACTTGTTAGTA
>Locus_50117_101
CTGTTTACGAATTACCACTACATATCCTTAAAACAAATTATGTTTCATTATTTTGAAGTAAGCTCCAAGAATTTCGCTGGTATGAATCGGGCTCTTTAATT
>Locus_50116_92
GAAGGCTAGAGAATAACTTCCATGGGAAAATTGCTAAAATCTTTAGCCATTGTTGGTGGAGTGATCTACGTGATACCTCCTCTAGATCGGAA
>Locus_50115_80
GTCAAATGTGTGTGTTCACGAGCTTAAACATGTTAAAATTCATCAAAGGAGATTATTACTTCTTTACATAAACATTAAAA
>Locus_50114_76
GAAGGCTAGAAATCCTACCAAAAAATATTTCCATCTCAACACAGTGATGGGTCAGATATACTTTTACTGGACAGCC
>Locus_50113_79
AACGGTAGATGAAAAGTAGTGTTTGATATAAACTCTGCCCTCATTTCATTCTTCCATATTATGCTTTTTCACAGTGCCA
>Locus_50112_113
GTTAGGGAAGCGGCTGCCTATACCTGAGTGTCCTGCGAATCAAGCTCGGTATGCCGTTCGCAAGAGCCTCAAGCTTGATCGGCAATCTATCATGGCTGACCTGTCTGCTCTTA
>Locus_50111_87
AGACGTTCTGTGTTTAGACGCCATTTGGTTTCAAGTAAGACAGGACCTTCGGAAATGTCCACAGGTGGCATCACAAGATCGGAAGAG
>Locus_50110_93
TATTGAGTCTTCATAGGTTCAACAATAACTGTAACCAGGGTTTTCTCTAAGTGTTTTCGAGGCGGCGATGATAACACGATAACAAGGTCCACA
>Locus_50109_80
GAAGGCTAGAATATGTGCGTCACACGCATACACGTGACCACTCACACACACACATTAAAAACGCACGCACGCGCGCGCAC
>Locus_50108_72
GTGATGCAGGCCAAAGCCTTGCATCCCATCCATGGTGTCCAATATTGTTGGGATGATCGTCAGCGCCGTCAT
>Locus_50107_72
ATTAAAGTCTAGTTGTAGTACAAGCAGTAAATGAAGAACCTGATGAGCCAACAACTCCTTTGCTTGTTATGT
>Locus_50106_152
GTTTTTACCAGCGAGGTTTCAAACAGAAAAAAGCCCAGGAGAACATTAACTCCAGACTCTCTTTGGTCATGAAGAGTGGAAAATTCACTCTTGGATACCACACCTCTCTCAAATCACTCAGAAGTGGAAAATCCAAGCTCGTCATCATTGCC
>Locus_50105_83
AGGCTAGACCTATTATTGAACAATTGGAGAAGATGAGCCTACTTTAGCTTGTTTTTCTAATTTGAATTGATCGGTGATTTTGG
>Locus_50104_163
AATTTTAAATGTTAGTTAACCTACTCTGTTCATTGCATTTTTCTAAAATAACACATGACTTCTGCTGTGTGATGCTTGATTGGAGTGAATGTGCTCAAACATCAGAGGTTGAGAACCTGTGACATAATGCACATGCTGTCCTTAAAATTTACCCTAACACAAC
>Locus_50103_103
ACTTTATTGTTTTTGGTGACAGTGCTTCCAACTATACACAAATGTTTTATTTGAAAATCTTTTGCTTTATACAAAATATATATTTAAAACTTTTACAATATTT
>Locus_50102_102
CCTGACTACTACTACTACTTCAGAATGCTGATAGTAATATTTGCTGAGCTAGGGCGTAACCTGAAGTATCACCGTTTAACTTGGTATGGTTTACCTCACATC
>Locus_50101_235
AACCCTTAGGGTAGAACTGGACATGAAAACTGTGACCATGCATGTGGATGGGATGTGCCCACCCTTTTCCTACGCCCATGTTCAGAAACACAAATTGATAGACCTTGTTGTGATCTAGATTAACTGTATAAGAACACTTGCAGCCGCGTTCTTCTCCACATTCATCATTCTTACAAGCTGTTGTTACTTCACGGGGCTGCGTCAGAGCAGGCACTGTGGGAAACACGAAAGTTCT
>Locus_50100_112
TAATAAATAGGTAAATCCAACAGCCTGTCATTCAGGCCAATCCAACTGTCATACACAGCGCTGGCAATTATCAGACAATCCAAGTTGTTAGGGTTGCAGCAGTTGATGAAGA
>Locus_50099_116
TCCCATAGTACTTCCCAAAACTGAGGGGTCGCCAACTTGTACATTCGACTAATAAATTATTCACTATAATGCAATTTTGCACTGTTAAATTTGCAGTCGTACATATAAATACATTT
>Locus_50098_87
ACATGAGAAACCGGAAGAAATCCCCTGTGGAGCTTAAATAAAGGAATATCTGGTCAAATTATTTAGGAGTTAATTTAAAGTGTCCCA
>Locus_50097_110
GTATTGACATTCATATTACCAGGATATACTGTTATAATGGGACTAAATTGGTGAGGTTTCATATGAGCAGAAACACTAACTGTCAATAATTAATGGCTGGGGTGGGTGGG
>Locus_50096_107
AAATAAACTCTTTATTATCCGAAAATAACGGTTGAAAAATACTTGGAATGCAGATATGAAAAATGATAAAGAGAAATGTTTATTGAATAATGAAATGGCTTGGATGG
>Locus_50095_110
TCCATTTTTATTCATTTGAAGAGATAAATATTACTTTACACTTTTTAACATTTCATTTACAACAATAACAGTACTTTATCTTTCATTCGTTCATTGATTTACAGCGAGAC
>Locus_50094_98
TTCCTGTTACGTTTTTTAGTTTTGCTAAGGGACTTCTTGGCAGATCTCAACACATCACCATGGCCAAAGTTGTTGCCCCAAACGCTTGCCCATCCGGG
>Locus_50093_85
TACCATAAACCAAACACCAGGTCATATTTAGTACTGTTTCTGCTGTGGGAAAGCCAGTCTCATCATGCTGTCTCCAACAGCGGTA
>Locus_50092_71
AACCGACGGTGAGCTACTCATCGACGTAGGCGAGACGGAGGTTGTCGTCTCTCCTGGAGAGTTCCTTCTCG
>Locus_50091_97
TGTTTTGTTTTCGTTTAGGTTCTCCATCAATCCAAACGAGAACAATGCTCGGTGGAATCGTTAAATTAACCCTTTTCGTCAATGTTTTTTTTTTTTT
>Locus_50090_126
TTTTTTTTGAACTTTTCGTTCCATGTCAAAATGGAAACGAAAGAAGGTCATAAAAAAATAACAAGTAATACTAATGTTACAAAAGAAAAGATTGCAGATAAATTTTGTTTGAAGTAGGGATGCCGA
>Locus_50089_90
TTGGATCTACGAGTCGTTGCGTAACTGAAGACCAATTACCAGTTAATATATTTTTTTTACCACTAACGCTTGTCAGAAAATATATCAATG
>Locus_50088_106
ATGAATATAAACATGTTTTAAAAAGTCTGCTAAAATGTAGTTAAATTATATTTCTTAAATTTAGATAAATGTGTCTTAAATGTTTAAGTGGTATAACTGATGAATG
>Locus_50087_157
GGCTAGAGAAATAAAGTGGTCAGCACAACATCTTGGCTACCCAAGAAATCTTCCTAACTAACCTCGCTTACACCACAACTTGAGAGATGGCGTGAGCTAAAAATGATCCGGGGTGGTGGTGAGCTNNNNNNNNNNNNNNNNNCAGCTTATTCAAAAA
>Locus_50086_84
TTCAACATTTACTTGACTTGTGAAACTTGTAAACGGTAAACCGAGGCATAGCCAAAGCCAAGGATCCGTCGAACGTGCCAACCA
>Locus_50085_137
CGGAAACTTAGAATGCTGGTCGCAGAGAAGATGTGCAAAAAGGATATGCAGCAACCTGGTGGTAATAAACAGTTTATTTGAAGAAATATTCATCAGAGATTTGTATAAAATTAACTACCCTGACCTGGAATGCATTA
>Locus_50084_99
TTCTTTGGTTTTACCACGAGGAGAGTACAATTATTTGTGTTGACAACAGCGATTACATGCGAAATGGAGACTTTGTTCCAACTCGGATGCAAGCCCAAC
>Locus_50083_71
AAAAAAAAAAAGGTCAACGACCTCTTTTTGCTTTCTCAGCTCCTCTTTCTTGTACTGCTCAGCAAGTTGAG
>Locus_50082_111
TTTCTTTCAGTTTAACCGACTTTTTAAATATTATAAAGTGGAAGATGCCGGCAAAATCCATCGTTTAAGACGTGAATGTCCATCGAAACAATGCGGTGCTGGAGTATTCAT
>Locus_50081_79
GTGTAAAGTCGGATTGAAAACCCCCATTCTCACTGAGTTCTATAACCTTATCATTTTCGTTGGATATAAATTCTTCTGA
>Locus_50080_108
GTTGAGATTTTTTAAAGTTGGCTATGACTATGGCTCATCTTCTTTGAACTATGATCATTATGGCCAGTCTACTCCTCCATTGTACGATCCAAAGAAGGTCAAGGTCCC
>Locus_50079_129
CCCTGCAAAGCCTACAAGTTTATAGACGCGCTGGGTGTTTTAAAATTCTCTTGTCACACATGTCGTATTTAGACATAATTCTTTCGATGTTGTATGTGGGCATCTGGGTACTAAATAAAGACGAGATGA
>Locus_50078_88
CGGTCGCCTTCTACCTTGTCTTTTACCATTAACTTATTGAACAATGTCAACGCCGATGTGCTGAACACACTTAACAGTAATTCAAAAA
>Locus_50077_72
AGGGTCACCATTCATTTACACATGAAATTGTCTCAATCATCTGAGAAACTTTCTGAATACATTCAGATTGGG
>Locus_50076_79
GTTACCAGTCACGACCATGGTGGTGCTGTGGACACATCGATTCATTACATCAACAAATACAATGGTCAGTGCTGGTACC
>Locus_50075_136
ATTAGTTGATGGTTGTTGACTTGGCTCAACTTCCGGTTGAGAAACTCGCTCAAATCGTTAACCTGGTGCTCAACACTGACAAGAGCAAGGTCTTGGCCACCCTTCGCAAGCTCCTCCAATCGTTCTTTCCCGCCTA
>Locus_50074_127
CCTATACACTAACCCAGTTAAACCGTGGATGGATGTATTGTACACGAGGTGTCTGCAATTCTTTTATGGGCAAACGAAGTATCTCATCAGTTGATCAACAAATTGGACCCGAACAAAATCATGACGG
>Locus_50073_81
GTCTTATAATAACGCAGGGTAGCTTAACCATGTTTCTTAATGTTTTCTTTGGTGGACGGTCCCCATACAGAAGATGCATAT
>Locus_50072_124
CCAAGAAACACTCAGTAACGCAATGCCTCCATTTCTCTCTTTGAAAGTTCACTTGCTATTTGGCAAACTTGTCTCTCTTCTCTCCCAGCTGCTCGGACTGACAGTACTTGAAGGACTTCTCTTT
>Locus_50071_102
CCGACTAATACTAGAAGCTTTGTGAATACAGTGTATAATCAAACATATTTGTCGTTATAAGATGTACAATACACAATCGCTATTTTTAACTTTCTTTTTTAT
>Locus_50070_101
GCGCCGAAATAAAACGTCGAATAAACAAATAAATCTTTTATCTTATCCCCTTGAACTACCCTGGCAGCCACATGTTCGAATTTTAGCCGTTTTTTTTTCAT
>Locus_50069_79
GTTCATGTATATGTATATACTGAATTAATGAAAACTTTCACTACAATTCCTTTGTTACTAACTTTTTTTTTAATAATAT
>Locus_50068_72
CACTGGAGGGAATATTGTACCCTCACTGTCCAATATCAGGGACGAGTAGATAGTGTGTGGTGTGTAGGAGTG
>Locus_50067_122
GAACTCGTTACGAAACATGATCGCACGTCTCAGCTCCTCCTTTAGATAGCGAAAGTCGCAGCCTTCGGGGGAGGTAAATCGCTTCACTTTTCCAAATGGCGTGTGGAGTTAACCGATTACCC
>Locus_50066_123
ACATAAGGTGGTGTGTCTTACAAATGTAAACAAACCAACTCTTTTCAGTTGATCACCTGCTTGGTCAGAGATCACCGGCCTGATTTTATTTTTATATCAGCTTTGCCATCTTGGTTTTTTTTT
>Locus_50065_82
GCTAGATTTTGAAACTGTATTCTCTTCTCTCAGGCATAGAGATCTACTCAGAGCTTAAAGATAGCTTGCAGATCGGAAGAGC
>Locus_50064_88
AGCCGTGCATCTGGAGCCCCAACTGGTCCTTACTAAAGACAATCAGGAGACAGGTCTTGCCGCAGGCACCATCACCAACAATGACAAG
>Locus_50063_378
GAAGGCTAGACCGTGTATATTTGTAACGTCTCTTGATTCCCATAAGATGCCCAATTCCGTACCAAAAGTAAACATAGTCATCTAAGTCTGCAATGGTGCACTTTAAACCCACTTTCTCAGGATACATAATTATGAGACCAGTGAATGCACTTTGTACTAGTCCCATATCGTACTGAGACAAAACCTTTTGACTTGAACCGAGGATGTCTCTATCCATTCGCTTGCGTACAATTCTGTGCATTGCTCGAACATCAGTAATAGATTTCTGGGCAGTAGAGCCATTTTTCCACACATCGCCGTAATGCCACGAGGCTACATGATGAAATGTTTTCAAATATCTCTTGAATGCCTTTTTTTGGTGAATCTGATTCACCGGTA
>Locus_50062_199
TCTTATTTATTATATTATCTTAAACCCCAGTTCTCAGAAGCGTGTCCCTCTCTTCAACAAGCCTGGCAACATGCTCGTCCACAGAAGTGTCCAGGTCAATGTTGAGTGGTTTACCATAGGCATCCTTCACGTGGGGAATCTGGTTGGAGTCTGATGTATTACGCAGGCGCGCCTCCCTCTTCCTTTTTTTTTTCTTTTT
>Locus_50061_117
CCTTTAGGTCGACCAGGCTATTCTGTGTATCTTCTTTTTTCATTTTGAATCAATGATGCAAGAACTTGCTTTCACATAAAAGGATATGATCATTAGAATCGCTGGTGGATACAATAA
>Locus_50060_419
AAATTTTTATTAAAATTTAAGTTGCTACAGTTATAAGCAGAAACCTTGGGAAATGAGACAAATGATGCTTAGCTAAATGCAGGTAAGCATAATTTCTGGAGTGGGGTTCGTTCACTTGAGAGCTTTTGGGGAAAGTTATTGATTCCTTTTCCCCAAAACCCAAAGTGGTGCTAACGGTGGCAATCTATCAACATACAATAAATAGATGTTTTATCATCAGTCAAATTTGTGCATTTCAGTTAAAGAATACAAAATAATATAATCAATTGATCATAATTTATTTTGATGCTCTTTTAATAGAAGAAATGACTTATGCTCTTGAAAAATGTTACCTGGCCATTGCAATGGCATGTCAAGTGTGTTAGTAACATCTGGTCTGAATAATATCTATAAAAACATTTCTGGGTCATCGCTCCATG
>Locus_50059_93
ACAATTGCATTGTCGAAGCACAGCAGCATAATGGAAATGTTGTACTTTGCAACATCAACACTAGCAGTGTGTTGCAAGTAACTGATTAATAAG
>Locus_50058_123
GTTCTAAGACAGACACAAATATAACTGTGATGGAAGATATTCTGGTAGTATGTTGAAGTGAAATCAGTGACATTTAAATGAAGTTAAAATTATTGATGTGCTAATTTTTTTTATATACCTGCT
>Locus_50057_86
AGGGACGGAAAAGAACGTGGTCTGTAAACTGTCTCAACAATGTCTATAAATTCTTGGACATCCTCCATAGACCAATTAATTTTATT
>Locus_50056_79
GACCTGTGTAGGTTGTAAAATGGTGCAAATAATAGACTTTCAACATCCAAGAGCACAGCCAGATTTGTCTATTCTATCA
>Locus_50055_101
GAAACTACGTTCCCAATTTAGATTGCTCCTTTGTTCCAGGCCTTACTGATCGGGCTTAGACTAAGTCCCTCGCGATCGTATAATCTTCATCAGTGAGATGA
>Locus_50054_211
ATAGGACTGTAGAAGAATAGATTACTTCTATTTTTACTTTTTATTGAACATATATTTATATAGAAACGTGTCTCATAAAGCTGAGACTAAGTATGAACAGACACACACACGGACACACGCAGACACACCATCTAAGCTTTGATTTTTATTTGTGTTTGAATGTAAAGATTGTCAATTGAACCCAATTCCTGGTGACATGACAATCAACAGA
>Locus_50053_88
AAATGTTGACTGAATTATAATGTATATTCGCTTTCTTTTCTCTTGACCGGTAAGCTTTTCTGTGAGTATAATTGTGATGCAAATAGAT
>Locus_50052_82
AGGTGGGGTCTCCATAGGAGAAACATGGAGGTGTGGATCAGACAGGGAATGAAGACAGCTACCTGTTTTGTAATGTTCCTGA
>Locus_50051_106
TTCATCCAATATTTGGTTTAGTAACAAAATTAGAACATTTGGTCTTAGGAATTTATTTGACATTATTATTAATCTGATCCTCTGTCCTCCTCTTATGTTGTAGTCA
>Locus_50050_149
TATTACACGGGGACTTAAAGACAATCTTCATTGGTTCGTCTTTCAATAAATGGAACAGCTGTATGTAATCGTAAAGCTTCTTTGATGCACATTGTGGTAAATTCTAATTTTGCAAGATCGTTCCATTCTAAGTGTTCCCTCCCTTGAAG
>Locus_50049_88
TTATCACGATCAAGTTAGGGTTCCACACCTGAAGTTGGTTACTACTTGATGAGCACTTTCCTTGACTTGAAGTGCAAAACCAATCACA
>Locus_50048_82
TCTGTTTGCTTCCGGTACTAGTACTAGCACTAGCCAATTAGCCTAGCTTGGTCTTACTACACAGCAGTAAAGATTTCTAGCA
>Locus_50047_148
TATAAATAGATGTACAAGACAGTAGCTAGTGCTTTAAGGTAAAGTCAGTTAGGCAATGCCCAATAGACTTGAAGTCCACAAGCAGAGCATAGACCATAGCAGAATACTTAGAATTTACATAGTAATAATCTCATATATTATTTTTATT
>Locus_50046_148
TTTACAAATGATTAGTTCAAAGTCTAGAGGCTGCTTCTGCTATAAATTAGTGAAAGTATCATCGAAAATTGTTTAAAACTATTTATTTGGCAAACACAGCTGACCATACAATGGTCAAATGGATATAAAATATGCAGTTATATACACC
>Locus_50045_119
TTTTACGGTAGTTAGTCCCACCTATTGGCTGAGTTGTTATTTTATGTTTGCATCAATGCATTTACAATCTTAATGTTTGTCTACCGACCATTTTATTGGCCTGATGATCCAAAGCCTCA
>Locus_50044_133
TCAGTAGTCAAAACGGTAGATTCATTTTATTCTTGATGCTGTTGTAGATGTCTGCTGGGCTCTGGTCTCCTACCTGCATCTTTGATGTTGTTGAATTATTCACTGAGGCATTGTCAGGAACACAGAATGCAAG
>Locus_50043_92
GCGACCCGTGTTTCTTTGGTTCATCTGCAGAATGCCTTCGCTTGGTAACAGAGACACTAGTTTCTTCTGTCACCTTGCCACCCACCAACACA
>Locus_50042_72
GGCTAGAGGACTAAGACAAATGCCAAAAACAACTTTTATCACTGTCACTACAACTAACCTATGGTCACTTGG
>Locus_50041_76
ACTTAATAATATTTAAAATTCAAATCTTATAAGGGTTAAATGATGAGTCTAACTTGTGGGTGTGTGTGGGAGATCG
>Locus_50040_173
CCCTTCGAGTAAGCGGCAGTGCGCCTAAACAAAGATGAACGCTTCTCATTCCGTTCGTGCATAAGCTTGACTGGATGATGGCTTATGAGTAGTTGTTCCTTTTTCTTTCCAAGTATCTGTTAGTAGTCGCGAAAGTCCTCTTTTCTTATGGCATTTTTTCATCAATATATCTA
>Locus_50039_172
CAAATACATAGGAAGTGAAGCTTCCAATTACAATACAAGGAGTCTTGAAGGAGAGTGACCCAGCCCAGAGTTTGGCAGCCGCTGACATGACAGCACAGAATTTAATTTTAAACTGCGTCTCTCCGACCATAGAAGACCTGGTTGGTGAAGGTTCAAGGACGCCTGGTTCCTG
>Locus_50038_76
TATTTTAATCTCAGTTTCAAGTACGAGTAATTTTCTAAAAATCTTTTGGCGAAATGATAAAATTTGTTGTTTGTTT
>Locus_50037_72
CAATAGCTTTTTTATTGAAAATTGCTAACTAGTTTTCATTCAGGTCTTGGAATATTTTTCTTCTTATTCCTT
>Locus_50036_75
CCAGTTTCACGCGTTTCCTTCGAAGCCACCGCCCGATGGATGGGATTTGATCGAGCCCACCTTGGATGAGATCGA
>Locus_50035_117
GAAGCGTAGGAACTTTTAACCAGGCACACAACTCATAAATCATTTCAGTTATCTTATTTTAAAGAAAACAAGTATCACTAGTGCATCATTGCAGCATTCATTTAGGCATGGACAACA
>Locus_50034_75
TAGAGTTCACGCAACGGAATAAGTGGCCATTTTAAAACAAATAATTCAGGTTGCAAAATTAAAAGTAAAGCCTTT
>Locus_50033_237
AAACAAGAGGGAGGGGAGGGTATCTTATAAATGATCACATCACTAAATAAACACAAAAGAATGTGTTGGGGGTCCACTATTAAGTATCACAATCATTGATCATTGGGATCATACAGTGATACCAAGTTGTTGTGAGAACTCAAATTGTATTTCACGTGTAAAACATTCACTTAATCAAGACCACATTAAAAGTAAGTTATTCACTGTGAGACTTCGAGAACTCTAATGAAAGAATAA
>Locus_50032_76
TTTTTAATTTAAACATAATGAACCAATGATCACACAGTTACTCACAATTGAATATAATTAGGATCTTGAGATCGGA
>Locus_50031_142
AAACTTTATAACTTTTGTTAAAAGCTTTAAAAAATAAAAATTGCAGTATTTGGTTAGCTGTGTGCCCAAATAACTATTGAATTATCAACAACTCCAAAAGTAAAAAAGCAAACAGTAAAATTTGTCATAAATGCTGTCAACT
>Locus_50030_117
TCAACACCATAAACAATCAGAATTTGAACTGAATGTCATTTTTAACCTTGCGAGCCAAAATATATTTTTATTACTACCTACAGGTCATTATTACAGCCGCCCACACCTGGAGCAACC
>Locus_50029_101
ATTAAAATTAGCAATAGGACATAAATTCAAATCATATAATCCATCTTGTATGATCCAAAAGTCTATTTGCTCCCATATAGCTGTTGCACCATTTCCCCCAT
>Locus_50028_84
TATGACCTGACCTGTGTCCTCTCATTTCAGATCCTTTAAGAGTTATGGGTGACCCAGAACTAGTGGAACATTCATCAAATGTTT
>Locus_50027_100
GAAGGCTAGAGAAGGGAGAAACTCTTAGTTAGCCACTAAAAACAGTTAAAATTAAAACACACAAGTAAAGCCAAGTTAGTTAAAAAGAAGAGATCGGAAG
>Locus_50026_86
GACTTTTTACGACAAAAGTTTCACGCAATGAAGCCCTTGTGCTTAACTTTTGTTCACAACAAGCAATGATTGTGCAAAGAGGGTGG
>Locus_50025_76
AATTGAACGAGAACGGACTCGATGTGTTGGCAAGTATTGAAACCAGCCACAATGGAAGTTAGGAGATCGGAAGAGC
>Locus_50024_83
GAAGGCTAGAATGTTAAAATTATTAGCACTAACATTTTGACTATCACACACATTCCCTCAAACCACAAATCAATAAAACCTCA
>Locus_50023_72
CTTAGAGGACGTCGACGTGGATCTTCTTGATCAGGGCTATTTATTTTTTTACCACTAGTTTTACTTTCAGCA
>Locus_50022_181
ACTAGATAATACCAGTATTTCGCTATAGACGTAATCGATATTAGACTGAAGTAATTGGTCGTGCTGATTGGGATTCCATCCTTGGTTGTAGCTGACATTAACGAATCCGTTCATGTTTTGGTGGCTCATGCTGTTGTTTCCCCTTCGATTAGTGTTGAAGCCTTCTTGCCCCTCAAGTTGG
>Locus_50021_208
CTATAATTACGAGTTGGCCGGAGAAATGCTCGACCACCACCAAGTCCTTTGCATGAAGAAAATGAAGACGAAGACGATATTCAGTTCGATCGACGAGTGAGAGAAGATCAGAGATATTTATCCAGAGGACCACAACGAAGACCATTATCGAATCAACAAGAAAGACCTGAAGATTACATCGATGATCGTGATCTCTCAAGAATGGCCA
>Locus_50020_91
CTTTCATGGTGAAAATTTAAGTATACATACTTCTTGTTATCGCTATACAAATCATAATGGATTGAGGTCCTTATGTGAATCATGTGCAAAA
>Locus_50019_71
GAAAAACAGTGAACTTCTACTCAGCTTTTGGACCAATCAGAAGTACTGTATTAACACTTGTTCGGCTTTCA
>Locus_50018_125
AAAGAGTGACCAAACTGTCTGGCGTTCAGTTCCTTTGCCGGAAACGTCAGGAATGTTCCATAGAATGCTACTAAAGAGTAATTCTTTGCAAGTGGTGCAATAAAAATCTACGTGGGTGAGACAGC
>Locus_50017_94
AGGAAAAACGGCAAGAACCCCTTTTTTATCTTTCCTTGTTTCTTTAACTTCATTGTTTTTGTCTTTTTCTGGACGCCTCCTGCCTCACCATCCG
>Locus_50016_82
GGGCGAGAAGGCTAGGCCGCAGCTTCAGGGCGTCCAGGACGGTAGGTCATGAAATCGGCAAAGCGAGTTTCACAGATCGGAA
>Locus_50015_82
GCCCTTTCGTGACTCAAGATGGAAATATACTCTTGTTACAAATACCAAAGAAATAAATAAAACAACATAATATGACAGATCG
>Locus_50014_75
TTATTTGGTTTGTACCGTCCTTACTTCAACGAACAACAAGTTGCCGACTTCCGGGAATGTTTCCGTCTCTTTGAC
>Locus_50013_115
AGAAGGCTAGATTAACCGGGTTTCCTAGTTTTTCTAAACAGGAGCCAATCCTAGTTGTTTCAAGCCAGGGCCAAACACAGAGACTGAAAGAGTAACATTTTGATACCAAAAAAAA
>Locus_50012_93
GCCGCCCAAGGTTCTTCGACAGCGGTTGGTAGCCTAGGTCTTGCAGACCAGTCACGAGCCTGTGTTCTCTTCACTCTCATCATTCACGAAACT
>Locus_50011_95
GTTGCTTTTCATGAGCGGGCTCCTGCTCAAGCACGAGAACCTCCTGGTCTTGGCCACGTTCGAGCTGCTCGACGACATCGAGAAGCGTCTGAAGT
>Locus_50010_155
AAAAAAAAAAACTCAGTAGAATGCAGAAAATTTTATTGGTGTCAACAGCTGAATATCAGCATCAAACATTTCATGCCAGCATTACATACCACTTGTGNNNNNNNNNNTACAAGCATCACATTCAACTTGAGTACAAGCATTACATACCACTTGTG
>Locus_50009_130
GGAACGTGTCGAGACGTCCTAGCGCAACAGTGCTAAAAGTACCAGTCATTGTAGCAGTGTCCAGGTGTTTTGTGGATCACTTGTGCGCACGTCATACCTTCGTCAACGATCCCTAACGTGTCACCAAATG
>Locus_50008_86
AATACGACCTACAAGTCAGTCTCAAGTTTGCATGGGAAATTGGACATCTGTCACCTGTTCAGCAGGACAAAACTTCACAACCTCAG
>Locus_50007_90
TATTACCAATAAGAGTACAAGTTTTGTGTAAAGTTTGACTAAATTTAAAAACTAAGAAGCTGACCATTAAACAGGTCAACAATTTTAATC
>Locus_50006_97
TTTTTATATAAATTTTACAGAGAAACACTTGCTGAGATGCACACCCACAGCTGGCTGGACATTTAAACAAATATTTGAATGATTCCATATTTTTCAA
>Locus_50005_126
TTATTAGTAACGTGTAAGTTCATCATATTTTATTGTCATTCATCTTTCTATGGATGTATTCAGTGTTAGCTTAGCTATAAAGTCTTTGGTTTGCACTGAACTTCACCACTTTCAATTATTTATAGT
>Locus_50004_115
GGCGGTAGGTTAGTACTCGTGTGCGATCCTCTGTGAGAAGAAGTCGCGTTCGACGCCCAAGCAGCCCCTCGATCGACACTTATCCGAAATTGCTGGCTCGGATGGAACGATTTAC
>Locus_50003_82
AATAAAATAAAACGACGGAACAGATCATTGAGTGACATTAAAAGTTGGGGTTAAATATTTACATAACACAGGAGTAATTTCA
>Locus_50002_71
GAGAAGGCTAGATAAGAATCCAGTTATTAGGTTTTGCAAACTCTGCTTTTTTCATCATGGATCCTGCTAGG
>Locus_50001_133
TTCTTTAGATAGGACAGTTCAGCTCAATGTTTCGATCTACAACAAAGAGGTTTCCCACTTATATCTTCGGGCCGAAAGATGGCCCCTCTCCCGGTTCATATGAGGTTAAAGACACTGCACCTAAACTTCCAGC
>Locus_50000_110
CAAATTGTTCCCTCTATTACAAATAAAATACAATGATTTGTTTGCATGTCAGTTGATGTGCTCTACCAAAGATAAATTAAAATATTGCCTTCCTCAAAACTGAAGAAAGA
>Locus_49999_102
TACTTGACGACAAAAGGTAACAATGGTTCCGTCTCCTGTCAACTTTGAGTATGACTTTTGTTCCCTCAACCTCTATCTTTGAGGATGTATTCTTGATACAAT
>Locus_49998_115
TTTTTTTTCTTTTCTTTTAGAGAAAAGACAGAAGAAGAAGTGGTTACTACTACATCAAATCCTACACCTAAACCAACAGATAACCCACTGAGTAGAAAAGAAAGGAAAATTTTGA
>Locus_49997_78
GTTGTGGTCGATAAATAAGATGGGCTTTACAAAACAAAATGTACGCCTGTTTAGGCATTTTCTTTAGAACGGAAGAGC
>Locus_49996_132
GGTACCGGTCCTACTTCCAGTTTTTAACTTCTTCAAGACTTACTACTAGTGGGTCTTAAATTTTCTCTTAAAAATGCCTCAAAATGAATATATTGAGCTTCATACTAAACGTCATGGAAGGAGACTTGATTA
>Locus_49995_91
GAGAGAGAGAGAGAGATAAATCATGATCTCGCATTCCCGAACGATCGTCTACTCGTGAAACAAAGAAATCCGATCGCGTCGTTTTTGAAGT
>Locus_49994_110
AGGTGGAGGTGTAGGTCCCCTGCCACCTCTGTTGGAATCGTCTTCGTCATCATCCCGCCAGTTCCGAAAACTTGTAGAGGTCACCGATGATGATCTTCTCCTCTGTTCTG
>Locus_49993_101
TACATAAACTATGTATGTCGTTTAATAATACGTTTATGTTATGATTCAACATATGTGATACAGATACATGTTAAACATTTATGGCTGGGGGTGTTGGGTGG
>Locus_49992_79
TACCGAGTAGACCTTTCGTGGTGTATCAAAAACTTCCCACTGGTGGTGTTTTGGCTGATGTTTCTGACAAAGGAACTGC
>Locus_49991_106
GTGCTTCCACGTTGCCTGGCTCTTGAAGTCATAGTCAATCACCAAGTCCCAGGTGAGGGTGGTGATCAAAGGCCTGGAGCATCAAGCCCTGATGACGTAATTCTCG
>Locus_49990_98
ATTACAAAATTTCCCCCTGTACTTTATCACAGCCATCCAAAATTACCAGAGCAAGATCACGAATTGCCTTAATAATAACCAAGCACACATCATCAAAA
>Locus_49989_123
CCTACTATGTAACCAGTAACGGAAATACAAAGTCGAATTATTCGATGACAATACCAAGAAATATCTTCCATCAGCACCGGGAATTGGCATGCAAGTCGAAATCAAAGATCCAGATGATAAAAT
>Locus_49988_102
GGGAAGGTTAGAGTTTTTATTAGGTCACTATATACCAAGCAACATTCTGAAGGAAGGGGCAAATATGTCTCTACTCAACAGTCATAAAACTGCCAGATCGGA
>Locus_49987_136
GATTTTGCGTTTCTGCGAGGAATTGACCTGACGTCGTCTGACGTTGTTTTTCCTGCTTCAAGGCGTGTAGTTCAACCTACACTGCCTGACATAATTGTCTTGGAGAATCCTCTTCCATCTTCCCGACCTAACACAC
>Locus_49986_77
ACAAAATTTTTTTAAGTTATCAGCAGTAAACACATGTTATTGCTGCGTATTTTAAACGTAAGTTGGCATCGGATTTG
>Locus_49985_84
AAATTTAGTAATAAAAAACCTCAAGTTTAAGTTACAGTGGCATTATTTAGCAAAGATCTTGCTGGAATATGTAAAAGATCGGAA
>Locus_49984_108
AAGCAAAACACAATCGAACAATGTATCTCCTTCTTTTTTATGTGTCGGTAATTGTATCTGTGTTGCTGTAAATCGCGTGTGTTTCCTTTATCATGTGACTAACTCAAA
>Locus_49983_92
TGGGTCGGTTAGCTTAGAATCACACAGGCACTCATTGAGACACAACCAATTGCGAATGAAACACAAGTAGTCATAGAGACCCAGCCCATTAT
>Locus_49982_86
GTACTCTTTTTTTTAATTGTTATTTCATGAATACATTCTAGAAAAAAAATGTCTTGACAAAAACAACTAAATTTTCTTACAGGATT
>Locus_49981_199
ACTAAGAGACTTTAGTCGGATCCATCAGCCTGTGGTGAAGATGTCACTCCAGTGTCTAACAAGCTAAGGGAGGTGGTGGTATCAGCTGAGTTGAGGTTAGCAGCAGACGTGTCTACACTGCTCCCCTCTTTACATGGTGTATCTGCTAGTAATGTGTAGGATACGATTGCTGGGTCTGAGGCAGACTTGTGTGTTGAAA
>Locus_49980_128
TCTTACTATGTAAAAATTGTTCATCCTACATAGTAGGCAAAGGGGGAGACAAAGGGGGAGAAACTCAAGTAAACCTGAAGCACCAGGTCATTATGAGTTCAAGTTTCTAGATTAAAAAAAAAAGCTAT
>Locus_49979_85
GAAGGCTAGATTTCATAAGTATGGCTGCGACACAAGGAGCACAGAATTTCCACGAAATTACAGAAGCCAAATCGCAAGATCGGAA
>Locus_49978_84
TAAATGTGGAAATTCAGTACTAAAAGTAAATTAATATGATCTTTAGTTATATGGATAAATTTTCATGTTTTTAAGATATTTAAA
>Locus_49977_120
TCCAAGGTCTTCCGTTCATTCAATGTAGTGCAGCATTGTCCAAACAGTAGTCAGTGGACCAGCAAGTCTAACCTTGTCAGACCGCACTCTTCATTTGTTGTTAATTATTTTTTAAATATT
>Locus_49976_152
AAAGACTTCAGAGACGTCGAGGTTTTAAGGCAATCCTCACACTCAAAGATTAATGTTGGAGTGATCAAGTCTCGATTGTATTATTATTGTTATGCCTGTTGACTGCCTGGCGCTGAATGTGGCCAAATGTNNNNNNNNNNTGAATGTGGCCA
>Locus_49975_93
AGAAGGCTAGAAACCTGGCGGAACTCAACAAGAGGTACCCCAGTAAACACAAGGCAGCAAACTGCAACACCCTCTCGTCGTCTCACGGTTACA
>Locus_49974_123
TATATTAAGTGTCGTGTACTTGTAAATAAGATAAGAATGATTTCAAGCCAATCTTTAGATATTTAACACAGTTTTACTCTATTTCTCCCCGAGTTCACCCAGATTCGAATGGGTACCTGACAT
>Locus_49973_111
CGGTCACTAACAAAATAGTAACTATGGGATATTGTCACATGACTACTGTGTTTACATTTACTGAAGGAATTATTCTCAGTGTTAAATAAACAAACTCATAACATTAACTAT
>Locus_49972_135
CACCATTGGCGGGACGATTAATGACCTTAAGCGTGCAAAACTCACCTGGTCCTGCAGTCAACAACCAGTTCTGGGCTTGTCACTGTGCAGGGGAACAAACAGTTTGGATGTCCAACCACGGTTAAAGTGCCGCAT
>Locus_49971_122
AAATCAACTTTGTGAACTTGGTTTCCCCGTTTCTTTCTTCCTCGAACCTGGCATGATTGTGTGGATGCCCAAACCAGTATCCGAATCCGCAGATGGGCTGGCCAGGAATCAACACAGGTGAT
>Locus_49970_80
GTTGTCAGCGATAGGTCGGGGGATTCCCCATACTTCAAAAGCCAGACTGAATTGTTGCTCTTGAAATGTATTGCATTAAG
>Locus_49969_171
TATGGTATGATGTCATTCTACATTTTCAAAATGAGCCAGGCCACTAGACAAGCTCTGCTGGTCAGTTGCATTCCCTTTATTGATGTACTTGGGTGGTCACCTCAAGGCTCCACTATTTCAATATCCACCCTAAACAATAAAATGTCTAAGATGCAGAAAGTTGAAGGCAAA
>Locus_49968_115
ACGGTTGTAGTGAGTAGAAGGAGACAACCGCTTTGCCACTCTAAATGCCTATGGCTCTGAAGAAGTTCGCAATTCCAAACACTCTGTCGTTGACACCAATATGTAAAACCTAAAA
>Locus_49967_75
TATACAATGCCTCTATAGCCCGTTGAAATCGAGAGACAAAAAGACAAGTGTGGCAACACGAAGCGATAGACACCC
>Locus_49966_94
TGGATTGGTAGGGGAGGGGGATTCTCATGACCTCCATTATCAGGTTAGTGAGTCAATGACTTGTATTCAATTTGGCCTGAACATAAAGCTAGGT
>Locus_49965_177
ACCCTACTTACAATATTAATTAACCATTGAGATAATATCGACCTTGTCCATCTAACATTCGATGTGGATTGGAACGACTATTTGCCCAAAGTAGATTATGAAATGCACGTTTACCAATCCGAGGAAAATGAACACTACGTTCTTCGACTGATTCAATCGAAGGAAGATTCTCTTCTT
>Locus_49964_138
AATAACTGGCAGTAGATCAATAAAAGATAAGTAACAAGGATTTCTTTGACTGTGTTAGGTGAAAGAATTAAAGGCATGGAAAGAGGTAATTAAGTGGCAAACATGGTATAAAAATACCATAGAACAGTGCTTCTCAAA
>Locus_49963_118
TAAATTTAACAAAACGATTATAATGAGAGGAAGCTGTTGAACAGGGTGTTGGTAAGCCTGAAGAAAATACAAGACAACGAATGTGGCATGAAGCCTTCTTCAATAAACGAACAAACGT
>Locus_49962_71
ACAACCGTGAACAGGAAGAGCTCCTTGTTGCCATCGAGACATTTCCAGTAATCGTCGCGCGCTAGCCAACA
>Locus_49961_88
AGAAGGCTAGAACATCTTTTACTTGCCACCTTACCCAAAAGTTACATTTTCTAATGTCTTACATTTAGGGCAGTGCATATAACAATCA
>Locus_49960_135
TTTTGGTCGGTAAAAGATCTAACTAAGCACATATACTATACATTATGAACATGATGGATGCCGGTTTGCAATGCAAACAAACTTTCAGCAGCCTTTAAAATGAGTGAATTAATGCGACAGGCGATTAATGAATAA
>Locus_49959_94
TACTAGTCGTTATGAGTGGTCCTCCATTCCTTACAGTCTTTACAAGTCTTTGAAAATCTTAGAAATCGTAGCAAGTACGTTAGTGTTGATTACC
>Locus_49958_137
TGAGAGAGAGAGAGAAAGAGGGCATCCAATATTTAAACTGGGCAGTTTGTGCAAGCCACATTGCCGTTATAACATTTGCAATCAAAACATTCATCAGATGTGACATCGTCACCGTCTTTGTATTGCTGTCCCAGTAT
>Locus_49957_171
GGTGCGTCGGTTGTTTTTTCGCCCAACACAAACAAGGAGCCTGGATCACCTGACAACAGCAAGCATGCACAGATACCTCACGGCAATCACAGATACCTCACAGCATCCGATCTGAATTGTTCATCGCCTCTCCTCACCTCACTTCTTGCACTATTTGTACATGAAAAAAAA
>Locus_49956_126
ACTTCGTTAGTGTCATGTCCTTTGTCAACACTAATGTACCGGACAAACTGGTTCAACCACGAGTTGATATATCATCCGCATGTTTCCACACACCACAATAATGCCCACCGCAAACAGATCGGAAGA
>Locus_49955_160
AAGTTGCTTTTCTGATGTCCGAGTGTACCCAAAACGACTACAGAGAAATATATTGAATTCTTAAATAGCCCAATTGGTGACAAGACGGTACTGTCATTGCCTGGTGTCAATGAAGTAAACGCCAAATTGCTTATAAAAAATGGCTTCATTAAGGCCACGC
>Locus_49954_112
GGGAAGATATGGGGTAAGTCGCACAGTTGACAGCTTTGTTGACCTATTTTGAGTGCAATTATGTATACACTACTACTGTGGTATTTATTTTCACATTGTTACATTCCCTTAT
>Locus_49953_108
AACTGGTTACACAATTGGACACACTGTTCACTGCTTAAATTTATTCCGGGAGGATCCAATGCTTTATACAAGTCAGGAATAGACAATAAAATGATTCCTACAAAGAAA
>Locus_49952_101
ACACTTAGGATAGCGGCTTCACAAATCAACATACCGAGTCAATCAAATACAGAAAAGTAGACAAAGAAATATCAAGAGAATATCGATGAAACTATTTGGCA
>Locus_49951_96
TTTGGTTCCCACGCACACACTGTGTGAAGACATTAAAAACTCCAGGTCTGTTGATAGAGAAAATATGAATTTAATTCCCAAATTGAAAAAAAAAAA
>Locus_49950_79
TGTGTGTGTGTGCGTGTGTGTCATTGGGCAGCAGGGGCAACACGACCACAAACAACATCAGCATACGTTGGTCGTCCAG
>Locus_49949_93
ACACACGCCTTGTTGTTGTTGCAATTATTCCTAAAAGAAGAAGAATGAACGCAGCTTGCAACAAAAAAAAGATGAGAGCAGAGATCGGAAGAG
>Locus_49948_122
AGGCTAGAATTTTGAAAACATACAATCATTTTTAAAGTAGCCTTCTTTCAGTTGAGTAATTCATGACAATTTTGGAAATGCTGCATTTTATTTATTCATCAACCATTACCTTCAAAAGCTTA
>Locus_49947_234
TATATAGTATTGCAGTTAATTGTACATTTATTTAACATTATATCACAATCGACCGTGGGGCCTAGTCAATGTCCCTAGTGTTGTATGTTAAATGTGTCCTAGGGTTTCCGATAAACTAAATGACCAGAGGAGATGTCGTAATGTTGTCGTGGTGAACCTGTCTTTTAATGTGAAAATAAGAAAGTGAATTTCTGTGTTGTCTGTGTGTATAAATAAAAGAACCCTGTGTTTTGA
>Locus_49946_104
AAATAACTCGACGAAAATTAGACATGTGGTGTTCACAGTTCACGGTGTTACCCGTAGAGGACTTGGCTGACCGTTGTGGCATGCGGTGCGCCCTGAAACTACCC
>Locus_49945_185
TAACCATCCAAAGACAAGTTAATCTGCCGAAATTCCCAAAGTGCAAACCAACAACATCGAATCTTTACCATGCAGTCTATGTCAATATCTCGTGAATTACCTCGATGCCATCATTCAATCCAATTCAACTGAAGTTCATTTCGAAGAAGAATTAGAAAAAGCTTGTAAAATTCTCCCTACCGATA
>Locus_49944_183
GACGGTAATCGACTAGACTCTCATTTACTCTTCACCCATTTTTGAGCCTCCTTATATTACAATTAATAAACCAAATAACGATGTTACATGCATTCTTTTAACACAGTATTGTTAATCAGTCCTGTTTGTTGAATATAGGATTTCTCAAGGTTTGCTCCTTTTCAAGTGGCTTTTATCGTTCCC
>Locus_49943_129
ATGAGTTATCCTAGTAAGCCGCCTCTGATAGCACTGTTAAATTTGCTGAAAATAACTGGCTCTACTGGAACTGGAACATTCTGCTCAGCACAGTGGTCACGGTAATTCATGCCAACACAAATAAGCTTT
>Locus_49942_148
TTTTTTTGATGACGTTAACGACATAGTTTAATGCCATTAAGATTTTTGTATGTGTGTGTGAGAAAAAGATGTGTCTCAACTGCACGTGGCCCTTTCACAAAATTATAATAATGAATTCAGTAATTGCATGTGTCGTATTTAAATATAT
>Locus_49941_92
GGCCAACTCGACTGGTTGTTGTGCATTTGCCTTGCCGCCTTTCAGTAGTTAAAGGTTCAGACCAACAATTTTGTTTATCTTACTCAAGAAGA
>Locus_49940_88
AAATTAATAAATTTTGAAGATTAGCCGAGACTGTGCTAATGTTGTCTCTTTGATCAACATTCATAACTCAGTACACTCATTCCACAGC
>Locus_49939_77
ACATACAGTATCTTGATCCGAGCTAGTGTTAGTTTTGTTATCTGGCAGCCTCAACAGTGTATGTCATAGAACTAGGC
>Locus_49938_83
GTCTAAACAGGGTGTGTAAACTTTGTTATACAGGGTGTACCAAAACATTTGATATGAAATCAACGTTAATTACAAGAATTGGT
>Locus_49937_122
GCGTGTTATTGACCTGAATCAGTAAAAGACTTTCTGCATGCCCTGTGTCAGTCATTCAAAATCGTCTACGTTTGTTAGCACATCGGCTATGCGAGTTATAATACGTTAACACATCGGTTATG
>Locus_49936_98
ATTTTTAGTAACCACAAAGGTGGGCAATAATTAATAGACAAGCTTAGTATACATTATTATATTGCCAATAGTTAATTGATAGCTCTTTGAGATCGGAA
>Locus_49935_90
TCTAGCGCACTGCTACTTGTTGGACAGTCAGAAGCTCGACAGCAACCAACGCCAACAAATCATGGCGTCCGTGCAGCAGCAGCTCGCTTT
>Locus_49934_143
TACAAAAGTTATTATTTCGATGCTTGAAGTTTTGGGTTTATTCTCAAAATGAAGGGAAATCACTTTCAAGAGCTAGCCTTCCACGAGTCAACTCTTTCTTTGGTGTCGCCATCGTCTTCACGACTTTCGTCTTTGTGGCCTTC
>Locus_49933_175
AGAATGAGATTGAACTTAAATTTTTAAAGAGGTATGGCAATTTCATTATTGCTATCTACATGCCTTTCTAATTGATGACTTTTGTAAATTTTAAAATAGTATTAGTTTCTACGATTATTTTTATCATTAGATTAGTAGCAACTGTTGTGTAATGCCTGTATTAAAAATGAATTTT
>Locus_49932_85
AACACAACATAAAAGTTCAAAGGGGTGAGTTCTGCTTGATGTTGCCAGATAATGCTTTTTAGCGTAGGATTAGGTTTGTACAAAC
>Locus_49931_118
GAGTTCAACGACAAACGTGATGGTCATGTGTTTATGCTTTTCTGAAAATGTAAATAGTGCATGTTTCCTTGTAAGCCACTCCTTGACTGCCAAGTTTCTGCATCCAGAAAGAATAAAA
>Locus_49930_106
GCCTCAATTCTGGTACATTCAACAACACAGACTGTAGAGTGGAGGAAAAGTTGTAAGTTAGTAGGAGATTATAACAACAGGGGACATAATTGCTATTATAGTTATA
>Locus_49929_112
TTAAAAAAGATCAAAACAGTTAAAATCAAGTGAAAAAATTTGTAGAAAAAGTGTTTTGGCTGACATATTCTCCCCTTAGCACTTGATTATCAAGACAAACTGTGGAGGACTT
>Locus_49928_77
GCAGGTCTAGGAGTTTTCCGACCCGTTGCATCCAATCAACCACGGGAAAATCGCGTTCGATATAACTATCATGAAGA
>Locus_49927_81
GAATAATAGTCAGGGTACTGCTTTTCGGTTGGGGGGAGCGCATGGTCCTATGAACGGACACCGATCTCCACATTTGCCTAT
>Locus_49926_86
AAGGCTAGAACTCTTTGTTCATTTAATGAATGGATGTAACTACTTTAAGTCCTTTTTCATTAAACACTTGTATGTTGAGATCGGAA
>Locus_49925_71
GTCGGTGTTTTTAAAGGGAATACTGCTTAATTATAGTGCCTCTTGTGGAAATCATGGCCTTGCTGGAGTTT
>Locus_49924_85
AGGACGTTGTCTAAAATACACCACAAAATTACGATGATAATTTTACTGGAATTTGTGGTGCCCTGATGATAGCAGCTGGAGCTAT
>Locus_49923_77
ATAGTTTACGTAATAATATAGTTATATTTCAAGTATTTAAGCTATTACAGGGCTAAATTGTGAGTCTTTTTAATTTC
>Locus_49922_81
TTTTTTCTTCTAGATCGCTACTGACACAAACCAAACCGGGTCACTTTAACGATCGCCACGACCAAACAAAACGACGAACAA
>Locus_49921_85
GAGGGGAGAGGGTCCGTTTTAGTCACCACATGTCAATATTACATTTTCACACCTTTATAAAACTTACACAAAACAAGTGGCAAAC
>Locus_49920_239
GACTGGAGACGTACGAGCAGTGCTTCCTTAACATTGCCCCCAAACACTTCTCCCCCTAAAAAATGCAATTCTTATTTGAAAAGAAAAAATGCAGTAGTCGTTCCAAGTCAATAAATCAATAAGTCCCTGCTGTTGGAAAGAATTGATCAAGTTCAAGATTTGGTGCCAGACAGAAATTTAATACATTATCAAAGGCCAGACCGTGGAATGGATGAAAAAGATCTGAACATTTGCTTTCT
>Locus_49919_89
AACTTCTTACAGAGACTTAGAGCTTAGTTTGCTCCACAAATATTGTCAGGCAATAATACTGGTGATAAAATCAGAAAAGGAGATCGGAA
>Locus_49918_87
CACATGATTTGTTGTTAGAATTGTTTTGATGTGTACAAAAGAACAATGGTTATTGTTGATGTGTACAAAAGAACCATCTTTTGTCTT
>Locus_49917_354
CCCATTAGGTTCCTGTTGTGTTTAATATTGGAGTTCAATTGCCAAAGTTCTGTTAAGCCGTGCCTGATAGATCTAAGAGTGGATAACAACATAGTGCTAGAGAAACAAGAGAATAACGCAGTTTATCGAGGACATTATGAAAGTGGAAGACAATTACCTGTAAATATCACGTACAGAGTATGTGGATACAGGCATTTATTTTGCACGATTGTGATAGCAGCTACGCCAAGTACCATTTTGAACACTGAAATGCAACCGTGGTTAATACCTGTGGTAGCTACAGTGGCATCTATTGTGACAATACTCATTGTTACAGCCATAGTGTTGTGTTGCTTTTTACACAAAGGATTTAGA
>Locus_49916_114
ACCCCTACCTGGTAACGACTGGTAGATTTTGGTAAGGTTGCTAAGATAAGTCATGGATGGTTGCTGAGATGAATAAGATGGTTGAAGGGTAGATTGTGTAGGGATGGTTGCTGA
>Locus_49915_84
AACCAAGACAACTTTAGCACATTTCGTTAAGAGGTTCTACAGTTATCTACGTTGTTTCTACGAGACATTGTCGTTTTGTCACCT
>Locus_49914_102
TTTTACGAACATTTAGACCTTGCAACTCTCCTGCAGCGATAGCATTAATGTTATCCAATGAATTGGGTCCATTTCTGAAGGCCTGAAATGCAGTTAGTTTAA
>Locus_49913_149
GTTTACATGTGGTTATTCAATTGTGTCTGATTTTCAATCAATTTATCTTGTTGAGCTGGGCATGGTCTATATAGCAATCAACTACTAACATCAATTTCAGAGCTGTTCATTTTTAATAAATCCTCAAGAAAACAATTCTCTATAAACAC
>Locus_49912_126
GGAACGAGACAAGGTAGAGTTACTTAACAAGTCCTCGGTCGGGCGGTGCTGGGAAGATCCAGCCAAGTCTACTAATGAAATTGTGTTCCTGCTAGCGAATGCAGGTGAAAGTTCATAGATCGGAAG
>Locus_49911_94
AACGCAATAAGGTCGAGGACAGGATCAAAATTAAATTGTGGACATTTTTGTGTATTCAATAGTCATTTTTATGCTGTTAACGTGCTGATATTAC
>Locus_49910_153
AGTTGTTAACATAGTCGTAGATTCGAGATGACGGCGACCTATGATAGAGTCGTGTCGTCAGTAACCAGCAAGGAAACGTTGATGTCTGAAAGTGTTACGTACACATCAGCCAAGGATGAATCACAAGTCACGATGCCAAAAACGTCTTCTCCC
>Locus_49909_84
AATTAATGGTATATAAATTGAAGATGAGATTCTTGAATCCATTGATAAAACACTTCATGATGGGTAAATTAACAGATCGGAAGA
>Locus_49908_125
AATTTTACCTCAATAAAATATTGCCAGTGTATGATGGATGACATTAAGTTAATCATGAATGACATGTACATTTAACCATTAATAAAAAGAAAATAGTTGAAAACAAAATAATTTCATATCTCCGA
>Locus_49907_94
AGGGAGAAACATCGGTCACAACAGGGTAAATCTAATTTGACATTAGATGGACAGCTGAACCTAGGGAATTGTGAATTAATTGTTTTTATTTTAA
>Locus_49906_138
ACATGTGAACCTGTTATACCTGAGTTAGAACTAAATGAACATTTCATGCGTACACTTGGACAATGTGGCGAGTTAGAACAACTTGTACATTTCAATTCTGGAAACATGTTGCTCGAAATGCAGTCGTGCCAATGTCAA
>Locus_49905_129
GTGTCTACCGACGAGCTTTAGAAAATACGACCTTTGCTCTTCTTACAATCTTACGTACTGCAAGGGTAGAGTTTGGATAAGTTTAGAAAATTAAGTGATGAAATAAAAGTCATTCGAAATATGAATCGG
>Locus_49904_99
TAGAGAAGTACACTGATACATGTAAAACTCATGACTATAATTCAAGCCAAATTGTCTTTAAGTGTTGCTCCCATCCAGTTCAGTGGCATTTTCTGTGTG
>Locus_49903_83
ATATTCATGCACATGGTTTTCTTGAATGTTAAAATAATTTAGGGAAGATAATTTGCGATAGGTTTAATATTATTCTTGACAAT
>Locus_49902_84
AGTCTTAGAGTGACTGTAAAGATGAATTCTTTCCCCTTGTATGTTCTAATACTCATGTTATGACATTAGCCGACTCAAGATTTG
>Locus_49901_119
TTTTGTTTCTAAAGGTTTTAGGCCGGCAAGAATCAAGGAAATCCGAGATTGGTCAAATTTATTAACCTGCTGATGGACACACTTAAAGAAGAGAGACATAATGTCGATATGGCTGGGGG
>Locus_49900_122
TACCGAGTACCCTCAACCTACCTTTATGACAGTTTGGTTAGCCTACGTTTTGGGTTACATGCAAACAGAACTACGGAAAGAGTACCATGAAATTATAATTGCGCTTCCTGTCTACTTATTGA
>Locus_49899_73
CTGAATAGCACACAAGATATGGTTCGTACTTCCTGGTACTATAAGACAAAACCTTATTTGAAGACTTGTTTTC
>Locus_49898_100
TAAGTGCACAGGCCTTAATCTTTTAAGTGATCTCCGAGAAAGTCAATTGACCGTTGAAGGCAGCAGAATTTGACTTAAGAAGTTCCACATGACAAGTTCA
>Locus_49897_80
GAACAAAGTTCACTAGACGGAAGAATCAAGCAAGAAACTGAACATGTTTGTGTTCACATCAAGCCTCAATCAGATCGGAA
>Locus_49896_72
TAAATAATTATCAAAACAAATCCACAACCGGTGTAGCATCTTTTTTCCGTTCACTGATATTGATGAGACAAC
>Locus_49895_351
TTTTTTTTGTATATGTTCCTAACATCAATAATTTTGAGCATCAAACGACCCACTGTCAGTGACTTACAATTGAGAAACTAAGCCTGTGGAAAGCATTGGATATATTGTTACATAACATCTACTGCATCTGCTGTTGGGAGATCATTGGTCCCAAACAAGGGCAGTAAACAAACATGGGCAATTTAGACATGAGGTTAGGGCAATATTCCAATCATCAAGACAAAGAAATGTAATGTTAATAAACACTAGACAACATGCATTGAAAAAATGGTTGTTCCCAAACATGGTCTCATGGCTTAACAATTACATCCTGTGGTTTAAAAACAAAAGGTACAAGATGTGGTTAATTAC
>Locus_49894_237
GTGTAAACATGTCCAAAAATTAATTTTATGACCAAACAGGCATTGCTTTTCACTGGGTTTGGAAAATAAATATTTAGTCATAGGATAGTCATGAATCATGTTTGAAACAATGTAAGTAGCCAATAGTGCATGAAATTAAGTATTTGTCAACAGAAAAAGGAAATCCTGTATCATCTTTTTAAAATGACTATTAGTTGAAGTCTGGATTGGTGGGAAATTAAGTAGTGGTTTGTTGAG
>Locus_49893_72
ACATTATAGGTCTTTGTATACAGAATCTTTGTCATGACATCTCTTTCAATGCTAATCTGAATGTCTGTTTCC
>Locus_49892_119
CCAGGAGAACCAGATAGAGGAAAAAAAGTGGGTGATGATATTGCAAAGGCTACAGGTGACTGGAAAGGCATCGCTGTCACAGTGAAATTAACTGTTCAAAATCGTAATGCGAAGATTGA
>Locus_49891_113
CTAACAACTACTTGTTCTGCAGCGAGATGATCATTACGTTCACGTAAATATCGAATCAGATCTGCTTGTTTTTCCAGAATATTTTCCATGTAAGTTTCATCTCGAAAACCAAT
>Locus_49890_79
TTTTAGTTAGTTGTCCTCCTCCCTCTTATTATGAATTGACCTATGCTACTGCACCATTGACATCAGCATCTCTTGAACA
>Locus_49889_84
AGGCTAGAGTAATTATATACGATAGGGAATAAATTGTTTTTATTAGGCTAATCTCATTAATTCAAGTTCAACACTTGCTAACCA
>Locus_49888_139
TTAGCTATGAGCTTTTGCAGTGCGCTTATGATCCATATTCGATACTGTTTCTGATATGCTCTATGTGTGAATGCCGCATCTGTGATGTGCTCTCGTCTCACTTTGTGGTATTGAAGATGTATCGTATCGTTCATATATG
>Locus_49887_153
GTTTACGAGTAAACAACTTCAAAGATTTCCTTCAATGTCGCTTTGACAGCGGGGAAACCGAGTTCATTGGTGATCTTGACAACAGAGTCATTTCTCTAAAACGGATGTGCACGTCCAAGATCCTTGTCATAGTTATCTGTGTGGCGTCATTGG
>Locus_49886_133
CTAGAACTATGGGGTATAAACAGTTGTAGATACTTAGTTGCGTTATTTTAGAGTCCCGTTGTGGACATCATCATAGGAAATCTTGAACAACACGACATAGCTAGAAATCATTACGACAAAGTTGTTACCCGCG
>Locus_49885_122
GGTGTCTCGAACCAGAACTTCAGAGCTTGGTCTTGAATATAACACAAATACTTTGGAAATATAGGGAATATATATGAACATAAGAAATACTGGAAGCTGCTTTCATGGTTTACATTTCTCTT
>Locus_49884_89
AGAGTGCACATAGGCTCTTATAAACAGAAATTATGCACACTTTTTATGAAGAGAATCTCTTTGAAATCATTAGTAAACATTACACAAAA
>Locus_49883_163
TTAGAAATCTCCTATTCTACTCAGCATTTGTGGCAGAGGCCGCCTCAGATACAATTATAACATCAGGAAACATCATTCAGTTCTCTAGAGTCAATTTCAATAAAAGAAACTGCTACGATCCCAAGACAAGCAAATTTAAAGCTCAGATTCCAGGAGTGTATTA
>Locus_49882_86
ATACTAATACCAAAATTAAACTCCTTTCAATGACTGATTGATAGGAGATCAATGTTTTTATATCTACTGGCCATGATTAAGAATGG
>Locus_49881_130
GCCTCATAGTTATGTCTTTTTTTCAGTTCACCAGATGTGCAAAAGTCAATAAAAGAAGGAGATGATTTTGAGGCTAAGCAACGTAAATTTCGCTACTGTGCAATTGAGGCCACCATCGTGAGAAATGGTC
>Locus_49880_74
CTAGATGTCAATTAACCAAAGAGAAGCTGATGTTATACAAATGGATGCTCTTGCTACGAAACTAAATCCGATGT
>Locus_49879_76
TCCGCTATTTTCTAAAATTTACGCGCACCGCTAAAAATGAAGCCTTGAAAAAAATACTGACACAATTATTACATAA
>Locus_49878_131
TTTGTAGGTTGTACCTTTGTTCAAATATCATTTCCTGGCAGGCACAGATGAGAGGAAAAACAAACAAACATTAAAGCCAATGTACAATGTTCTTCAATCACTAAAATATGTTAGTCCACAACATGCTATTT
>Locus_49877_117
CGAAGTGACACAATATTGTACAGTGTCATTCTGCTGTACCTGGAGAATGTTACCAACCTCCTCATCTACTGCTGGATTGGGCGCAGGTTCCGTAAAGAAAAGTACAAAGAAAGAAGA
>Locus_49876_94
CCAATTTAGTTATTAAGGGTATCTGCTCTTGCCGAGCTTATTTCAGTTTGTCTGTCTTGTGATCTTTTTGATCAATACTTATTTATAATTTTTT
>Locus_49875_99
GCGCTAAACCCGCAAGAGTCCAACAGTAACATTCCTTGTAATTATAAATTTGCGAAAGGAAAACATTTTTAAAATATGTATCGCAAAGAAAAACCAATT
>Locus_49874_72
GAAGATGATTGTATCTTAAAATAAAATTAATTTCCCCCCAAATATGACTTCCCTGGTACACCACAATGGCTG
>Locus_49873_110
TTAGAATTTGGATTATAGTGAGGGCTTATCAATCATAAGTATTTCTGCTCCACGTATTGTAGCATCAATCACTCTGACCACTTGATTGTTGATTGTGACTTTAATTTCCC
>Locus_49872_174
GGTTTTTCTAACTAAAAGAACTTCTTTTCATCAACATCTGGTGGTGAAGTTAAATCCCCTTTGTAATCAATCACTCCACCACAACCTAAACGCCATTCGAGAATTTCGGTCGAGAATTCATCGGTATTGCCTAAATCAGTAAAACCGATAATTTTATCTTTGACAATATTATCG
>Locus_49871_177
ACCATGTGGAAAAGAAACAATAAATCTACAGAACATGCTTTAATCCTAACAAGTACATCATATGATCCAAGTTCTGGTAAACTTTGCTCAACATTTAAGAAAAGATTTGTCCCTTGACTAGAGAAATTTCCGCGTAAAGTTTGCATTTTTATTAATCAAAACTGAAGGCAATATCAG
>Locus_49870_110
TGGCATTTGGAAGAGATGGTCTGTGGGAATCATACAGACACTAGCTTCGTTGAACCGTAAATCTGCTCTACCACTGGAGGAACAAGCAATACGCTGGCTCCTCTTTTATC
>Locus_49869_103
AAGGCCGCCTTGGCGAGAGGGATCTCTGCACTCTTGTAATGCTCCATCTCTAAATCCCTTAGTTTAATCATTCAACACATGATTATGTTAAAACAGATCGGAA
>Locus_49868_75
AATCATCGGGGTATACTTAAAATGTTATAAATTTTATAAAGTAATTTACAGTATCTCTTATCGATGTTGAATATA
>Locus_49867_94
GTTCGACCATAAAAATGGATTATATTTGTTACCTCGTTATCCAACTTGGGTTGCTGAACAGTCTTGGTGGACAATTTGGTGAAATGATATAAAA
>Locus_49866_136
CAACTTACTACGGTTTCAGTTGGTAGATAACTTAACAAGACAAATGGAATGAGTGCTTGGACCTGACTGGTGGAATCACTAAATTTCCCTTGTCAGGAAGTGGCCTGAAATTACATTAACTGTATTAATTTTTTTT
>Locus_49865_79
GACATTTATATTTGGTAAAAGAAATAAAACAAAAATTACATGTCTGAGTAAAGATCTTGTCATCTAATTTTTTATTTCT
>Locus_49864_92
ACCTGGATACAAATCAGAGTTGTTTTCCAGAATATAATTACGGAATCGCTACCTTCTATGCCTTGTTGGTACATTTCCTTGCGGGACGAAGC
>Locus_49863_81
AAAACCTTGACGTATTTCTGAGGGTTTCCATATTCACCTAATCTGTGTCATAAGAAATGCCAAATTGATTCAAAAAAAAAA
>Locus_49862_77
TAAATGAGCTTCCAAACCGACACTCTATGCCTTATTTTTGACTCAAATGTCGTATGGTTATATTTTTATTAATTATT
>Locus_49861_128
GTTAACACATGGACAAAAAATATTTTATAGAATTCATTAGCATTGATAGTTGCTTTGGAATTACAGGAAACAACATATCATTGTTACTTTAAAGCAAGAAATGAGGGCTTTTCTTTCTTTTAAAAAAT
>Locus_49860_93
CAAAATAAAGTCTTGATGGTAGAATACACAAGGAAAAAGTCACTCTGTTCTCCGTTCTCTACGCTACCGTTGCACTCACAAACTCACACTCTC
>Locus_49859_93
GGCTAGATTTTTTATTGTCTAATAACATATGATCCATACATATATCAACATAAAAATAATACACACACAGGGTGGGAGTGATAGATCGGAAGA
>Locus_49858_111
GCCGTCTTGTTGTAAAACTTTTACAAATCAAATTGCCCAGAAAATCTATTTTGTGTGCAAACAAAGTATTAAAAAATGTTTAATAAACATGGAGGCAATCATACTGAAATT
>Locus_49857_95
TTAAACAGTTTCGGTTGTCAGAGGTAGCTAACTACACAAGACTAGACAATTATGACAGCAGATTCGTCTTGGTCACCACCTGGAATAATGTTGCC
>Locus_49856_288
AAGGCTAGATCTTGTAAATTCCAGTAAACATAACAAAAGTGATCACCTTAAACACCATTCCTAGATAACACAACATAACATGTCAACAGTTAACCAGGAGTAGAGACAGCACATTTCGTAATGAAGAAGAAATGTATATTCAACAAACTGATGCAAATATACAGGTTCAGTACACAAAAATTACAAAAGCACTGCAGGATGATCAAACAAAGGAAATGAACAAACCATTTACTCTACAGTACATGAAAGTGACACTACACAACATGAATAAAAACAATTACCCTGTTA
>Locus_49855_76
AAAATTTTAACATTAATTTTCTAATTCAATGGCATTGTCCTCTAAAACATATGCAACTCTTTACAAGACAGCAGAA
>Locus_49854_109
TAGTAGGAGTAGTAGTAGACTTAATTGAATTTGTTTAGGAAGTTCAGTTTCCTCCTCTGATGAGGAAATGTTTTTATTTTTCACATCTTCAGTCTCTGCATCTGAGTCA
>Locus_49853_110
ATTCACGGACGTCCGTGTTTTGGATAGTGACACATAAAACACTTTGTTTTCATAGGCTAGTGTAGAGTAAGTGTTAAAATAGACCTAACGCCATTTTGAGTGGGCTGAAA
>Locus_49852_119
AAGTGTAAGAAACTTCGGGTCTATTTACAGAAAATGGAGCGAATAGCACTTGTTTTAATAAAATGTTATCTATGTTGATTCAAACTGATGAACCAGTATACAATAAAGTACACAATAAG
>Locus_49851_71
ATCATTTAACAAACCTTTCTTACGTTGTCAGACTTGCTACTTAGTGCAGTTTTTAATTCCATGCATAAGTG
>Locus_49850_162
AAGGGTCCCCGACTGGCGTGTGCCTCTTCAACCTCTAAACATCGACTACCCAAAGGATCTCTTGCATCAAGCACTTCTAAAATTACATCAGCAGCATCTATAACCTTTTTAAACTCTTTGTAGAATGTTTTCCTGGAATTTTCAATAACTTTATTAGCATTT
>Locus_49849_75
ACAGAAGTAGCGGAGTCAATAACAATACTTCTACTTATGAAGCTTTCAGATACAGAAGCAAGTTGAGATCGGAAG
>Locus_49848_97
ATTTTTACCGACGCAGGTATTTGAGGTCATGTACATTATGTGGACAAAATCTGTGGATGGGACAGGGATCCCTGATTACAAAAACTGTTGGGTCTGG
>Locus_49847_163
GGGTACAAAGACACACGACGCCTCATTGTTGCAAGCAGATCACTAAAGATCAAAATGAATGTTGGTAAACTGCGGGAGCGGAGTGGCATAAAAAAGGTTACTCTTGACACATTAATTACTGAAATGGAAAAGTTCGCTGTATCTAATCCAGGGTTAAAGCAGC
>Locus_49846_104
TAGGTTGGAGGGCCCTTGATTTTCTCGGGAATTCCTAGACGTGGTGTTCAGTCGAGCTTATGCTGTGATTGGGGGCACCACTGTCAGGGAATACTTGAAAGAAA
>Locus_49845_243
TTAATATTGTTCTTAAAAGCTGACAAAATTAAGTTATACGATGCATCACAACACGCACAACTCAAGTCTAAGCAGCTACTGGCTCCACACAATGTATGATACGTCATTACTCAAGTAGTACTTGTTTACCACCGCTCCGTTCCACGCCTGCTTGGGCTGGTAGCCCAGGCTTGTGAGCTTGTTGTACAGGGCCTCGTGTTTGTCCGGCTCAGCTGATCGAGACCAGTGAGTGATGATGTACGG
>Locus_49844_72
ACAGGAATCGGGCATCTCGACTATATGTGTTTCTTAGACTACCCAGTTTTATGTGCTGTCCTGAGGCTGTTC
>Locus_49843_93
TGACTTGAAAAATGAGATATACAGCCTTCTAATATTAATATTTACACTTTTATTCATTGTTTTAGTGTTATCATCTACTTCCAACTTTTTTCA
>Locus_49842_88
ACCGGGAGCGGTTTGTCGTCGCAAACAGAATACCAACAACCTGAACAAATGCAAGCCCAATACCAACTCCTCCAATAATGGCAACTTT
>Locus_49841_77
TTATGCTGCTCGGATCGTGAAGCAGCAGTCTGTTCGCTTCAGTTCTTGTAGCCTAGCTGAAGCTGTTGTTTGTCAAG
>Locus_49840_110
CGTCCCAGGTGTGGTCGTGTTAGCGCAGCAGTCAGTGCAATACACAAATTCCAGGCCATACTTGGCACGAATGCGTTGACGAACAATCCAGTTGGGTGAAGTCATCACGA
>Locus_49839_98
CTGTAAGTACAAATTTCGTTTTTAACAGTCATGATTTGTGTTCAAATGAAAATGAGTCAATATTTAATATCAGAGCAACTGAAATGCTGCCTTGAACA
>Locus_49838_87
GTCGTATCGATGTGGCTAATAAACTTGGACAGGTGTCATTTTCTTAAGATTTTGTTGCTACGCAGACACTTCACAGTAAAATTGAAC
>Locus_49837_115
GAAATCGTGGTTTAACTACGTTTGTTTGACACTGTTTTCTAATTTTAAATTGACAATTAAAGATTTTCCTATCTCTTTTTAACGCAATTTCCTTAGGAAAAATTGCGTTTATATA
>Locus_49836_121
TTTGTACAATCAGAAATGGAATGTATCTCAAATATCAATGTACATATTGTAAAAATGGCTTCCTTCTCCTTTATTGTCTCGCTCATAGTGGTTAACCTTTAAATTCTTTTTATTAACACTT
>Locus_49835_178
GTTCTAATGGAAACTAATCTTGGGGAACCGACCATGAGGTTATGGGTCACACAAAAAATGTCCTAAATATCTGAGCAGATTTTATGTTTAAAACACTTTCAAAGTCAATTAATTGTTAAGTTAACGACTTAATTACTTTCAAGTTTTTTCTTTAAGAAATATAATTTGTTTCAATATG
>Locus_49834_90
TTTAAAAAAAAAAAGTGACTACAGTAGAATAATGCTATGACACAATGGTGATGAGTTAGGTCTTACCGTAACCTACAACCCACATAACAC
>Locus_49833_122
AATAAACCCTACATTGTAACCAGCACCTTTGCGTACATGAATCTAGGCTACTAGATTTGTCAGCAACAATTTGATGATTTTTGTTAATTGTTTTATTCATGTTAATATTTTTAAATGTAACT
>Locus_49832_73
CTGTTTTACCGGCTAAGTTGAGCTGTCGACTACTTAGAAAACCGAATTTCTACCCTTGAATTTATAGTCTTTG
>Locus_49831_79
GTAGAGAGATGTTTCACTATCACATTTTGTACAGGACTGTAGCGTGTTAACCCTTTCATCTCTCACACCGTCACATTTC
>Locus_49830_87
GAAGCTGCCAGTCTTGCCACTTGAGCAAAAGCACTCCTTGGTCAGCCCAAGTTGAGAGGTCTCCGTGGTTGGGGACCTTGAAAGGCG
>Locus_49829_85
CTATAGATTTTGTAATGACTCCCAGTTGTGTTACACACAGACCTTTATAAGACGCAGGATGTGCCAAACAGCATCGATATTAAAA
>Locus_49828_131
ATAACCTTAATAAAAAGGAACATATTTAGAAAAGCGAATACAAATCAATTTTAGCCATATTATTTGATGGAAAAGTATAATTCAGAACGTACCTCATTGTTAAGGGATAAAAAGATGGTGCAACATTACCC
>Locus_49827_121
AAAGTTCATCAGTCAGGACAGCTCAGCACTTCCATAGACATGATTTGAAATAAGTTTGAAAAATAATATATGGGTTAAAGCGTTAATTAAAATTTATAAAACTAATGACATTTATTAAATT
>Locus_49826_106
TTTAAGTGGTACGTTCGTACATAATTTTACAGATAAAAACATTTTAATTCATATTATACGTATATTTGCAAAATAATACCAATACTTTGTAATTGTTTTTTATATT
>Locus_49825_110
GAGGTTCGTATCTTTATTTATGAATTGTGTCGTGGATTTATGGAAATTTCAAATTATGCTTTATACCAAATCAATTTTAGTTTTTGAGATGGGCGCTAATTGAAAAAAAA
>Locus_49824_142
AAAGTTATTTATATTAGTGTGTCACTCATTAACGTGATACATTTTTGTGTTTTTTCATAATATTTTATAAACCAATCGATAAATTATTTAAATCTCAGGAAGATGAATTAATGACATTACATATCTATAGAGTTAAACAGCT
>Locus_49823_103
GGAAACAGGATATAATAGTCTGTCGGCTTTCCTAATAGTAATAGGCTACAATGGGGACTCCATCATCTAAGGGGCCTTAGGCTTTCAGTAAACATAATTACCC
>Locus_49822_108
TCTAAAATTACGTTGTCCGGTTCACATGATATTGATCAGAGATGGAATAGTGAATGCTCAATTACAGTGAAGATATCCTCTAAAGATTAAAGTGATTCTCAATATTGT
>Locus_49821_106
GTACCGCAGCAACATACAGTACATCCTGCGTATGTGACGTGAACACCATCAATTCTTTACACAACAATCAGCGCGCATTCCTACCTTTAAAATCTCCAAATTTCAT
>Locus_49820_146
AAACTATACAGAGAGTAACCAGTGATTTTATTAATATTTCTTACTGTCAACATTTATGAAATGAAATACACAAGTTGAACATCAATCAATGCTAATGAATGAAATACAATATCATGAGGGGGGTGATGCACTCGGTGGATGGGCAA
>Locus_49819_84
AACACGTTTCAACGTGTCTTCTCATTTTTGCAAGTATTTACACTTTACTAACACTGATTTATTTTCCTTATCAAAATTTGCTGC
>Locus_49818_145
GAGTTAGATGTTTGATAGACTAGGGAACATATAACAACTTCTTGCCAATTGGAGATGGTTCTTTTCAAATTATGCTGATGCTTCAGGTTTTATTGTACTTGTACTAGTGGCTTGTTATCCTTCTAGGCTAATAAAAAGATGTTGA
>Locus_49817_87
GTTTAAAGTGTAGCTGTCAGAAACATATATTTTTAAATAAACCTTTGATTTGGAATTTAGAGCAAATATTTCAGTTATTTAAAAAAA
>Locus_49816_108
ACTTCTATTTTTAGAGGAAATAGATTTTTTAAAGCATACATTAAATATAATCAAGAACAAATAACCAAATGAAATTCAAATTTCATTGAACATCTTTTCATTGATGCC
>Locus_49815_143
GAGGTCAAAATTATGACGATTTGAAAATCACAGGTATACCCTGTATTTTGGATGTGGTTGAAACAAAGGCTGATCTAAATCAAATGCCAATATTATGAAATAAAACCACTATTCATTTTATTAAAGAAAAGTTTTTTTTTTGT
>Locus_49814_119
AGAACTCTGAGACTACAAAAACTGTTTCTGAGATTGTTGGTGTCAACAATTGCTGTAACTGGTCTACATGAAGAAGATGACTGTTTTGGGCTCAAACCATGGTAAAGAGATGGCGGTCC
>Locus_49813_108
AACGTTATTCTTTACAAACCTCCAGTGGCAATGAATTTAGGCCTAAATGAACCTGACTGTAGCCATAACACAGGCACAGTAACAAAACAAGGCACTTTAGTGTTACCA
>Locus_49812_94
AATGGTTCTCTAGAAACAGGAAAAATGATGCAATTTATTCTTCTCTTCAGTCGACAGGGAAAACTTCGTTTACAAAAATGGTACACATCTCAAA
>Locus_49811_167
TTTTAATAATAATAAAAAAACAAACTAAAATTAAAAGATTCATTAGTATGTCACAGAAAATAATATACATCACCATTACAAATTGTTTCACAGTATTTTGATTAGGGTTTTTAGAGCAGCGTTCCAAATCAATTTGCATGGGATATATCTTATTTATTAATACTTTT
>Locus_49810_121
GATCGGGGTAGTCAGGGTAGGTGTACATAAACGTTGTCCACGACATGTCATCTCCCCAATGAGTCATCGTTGGAACATTAAGGAACATTTCCACAAACATTTTCAAACCCAGCCGATGAGG
>Locus_49809_107
GTGAGATTGAGAGCTTATTTCTGCTTTAGTTTATACATTACAAAGCCATATCTCATTCTTATACATGTGAACCTCACACAATATCCTCGAAACCCTTGTTTAAGTTC
>Locus_49808_200
CTGTAGTACTTTCGTGTGTTAAATTACATATTCATATTGCAAAATGGGAATGTGAACCCCTTTTCAACTGTTTATGTTCAATTAGGACCAAGTGATTTGAAACGGTGTTGTCAAGCTTGTAAGAATGTTGGGAATAAACAGTACCATATTCTTGTATATAAACTGGACAGAATTTCCATTGAGCTGGACACTGCTTGGCC
>Locus_49807_120
CTAAAATTTATAACCATAATCTTAATTTCATACCAGACCTTGGTTGCTCAACTGATACAGCGTGGAATTAATTTGCTGTGGTAAACACGGAGATAGAGATTTGATGTATCTAGATTCTAG
>Locus_49806_121
CAAGTAGATTAGTCCCAAATACATATTGTCAGAAATGATTGACAGCTAAAAGTTGTATAACAATTGTCAGCCATGNNNNNNNNNNGCAGCAATGGTCAAATCTCATCTTAGAGCAATCATC
>Locus_49805_234
ACCACCAACATGACATGTATAGTCTATAATCTGTGATGCTCTACTCTTTCTTTTTCAACTGGAAGGTGTTCTTTTATAAACGTTTTCCTAAGCACCCATTCTCTCCCTTTATTATTTTATTTCCCTTTTATATATATTTTTTTACAAGTGAAGATGAATGTAAGTTATTATTATTATTAAACTTTCAAGTGTCGGCTTCTCTGATGAAATAAATTCACAATTTTTAGGATGCTG
>Locus_49804_135
CGGAGAACTTCAGTGCGAAAAAAGACAGGTTAACATACATGTGGTGAGCGCTGCAAGCTTAATTCCGTCCAGGTTTTTAATAGAAGGAAAGATGGTAAAGAGCGGAAATGTTTTCACTAAACTCTATCCTCTTCC
>Locus_49803_130
AGAGTTTTTGGGCGATTTTGGCATATTTAAACGTAGCAATAACAACAGAACCACGAGAACAGAGCTCACGTTTCGAACAATCGGATATTGTCAAGTAGTTTTTGTTGTTTTATTAACATAGAAATATCAA
>Locus_49802_115
ATTATAATAATTATATCACATTGGACAAACAAATTTGAATGGCTCAGAGAGGCCAAAGGGTCTACAGAGCATTGTAAGCTGTAGAGTAGGGTAATGTTAGTAAGAACAAGTTAAG
>Locus_49801_84
GTGATTTGGCGACTATGTTATCCACTAAGTTCATTAATTTCCCTGACGTTGGCATTTTAAATACAGTGATAATTTAGATCGGAA
>Locus_49800_93
TTGAATGGTTCTCTAACAAGTCATCTTTCTCATATTTCATCCATTCTCTCAATGTCCGGTAATCTCTCGCCCATTCGTCGACTAGGCCAAACC
>Locus_49799_137
TATGTTGGAGGTTTTTTTTTATGTACAGTCATCACTGGTATTGTTATAATAGTTAATTACAATCAGTAATTAACCGAAGACCAGCAATTATGTTGTTGTAAATGTTTAATCACATTTCTACTTTGATGTATTCAGAA
>Locus_49798_94
GGACTTTTGTTTACTAGAGTCTGGAGCAACAATGGTGCTTGACTTTAACCAACATTAATGAAGCCAAAGTCTTTTAAATTAGAATTAATTGTTT
>Locus_49797_167
GATAGCGTTCACTATAATTCATGAAAGCTCCCTGCTTTGTTTGTTTGTGTCATAGTGTTAACCTCTCATGTGCGATGCCCACCAACTCGGTGAACTTAAAATAAATTAGGCAATTTAGTGTATTTAATTACTCACAGCATTTTATTTCTTGCAATTGATTAACCAAG
>Locus_49796_78
AGTACACCTTCTACAGGGTATTGACATTCAAGAAGAAGATGACACAGATGGCAAGCATGAAGTAGATGGCATAAGTGG
>Locus_49795_96
ACAATAATAATTTAATTTTTTTTAAATTATGTCAATAACTTAATTCTTTAGGTTTTTTTCAACCACACTGCTATGGAAGACTAAACGATAGCCAGG
>Locus_49794_75
GTCCCATTAGAAAAAAGGGTTCCCAAGCACGAGATTAACTCTCTCAACAACCAGCCATGGGTCGCATGCACACTC
>Locus_49793_79
GTTGACAGTTCCAGTCGTTCTTTAAGCTGAGTGCTCTCTTCCACAAGAGAAATTATCAACAATTTACAGTGTTTGTCTT
>Locus_49792_88
GTCAGTCAAGAATTTTAAAGTAATTTTAAGTCACTCAACCTTATGCCATAGATTATATAAATTAAGCATATCCCTCTTGGTTATATAC
>Locus_49791_103
ATTGTCCCATTATGAAACAAACCACTTTCACAAGAAATCAGAAAATCTGTTTATTTCGGACAGCGTTCACCTATGGATATTTCTATAGTTAGTATAACAGCAG
>Locus_49790_122
GCGCCGGGTTCAGTAGCCGGTTCTCGTGAACGACCAGGCAGCGGCCGAGAATGGAATGTTCACCTTGCAGGGCGATCATCTTGTCGTTGATGTTCACCGTGGCCACGCCGTGCGCGTCGGTC
>Locus_49789_105
AATAGGGTGTTCAATCTGTGTGCAAGCTTGATTGTTTCTTCATGAGAGTCTACAACAATGTGTCAATGTGATGCCATCTTACACTAAGAATCATCAAGGTTTCAG
>Locus_49788_80
CAGGCCTTGTACGGTTTTCTCCTGTGATAAATTCAGATATTTGTAAGTCGATGTGATTTAAACTCTTTTTTTCTGTTTAC
>Locus_49787_145
AATTTTTTCTTTATGATTACCCATTATGACCTGACAGATTATGTAAGCTACCTATGTAAGCTACCTATGTGTACAGTTGATCTTGTCACTGATAAGAGTGCTGTCATTGGTTGTCTTGCTTGAGTTTTAACACAACAATAGTGAG
>Locus_49786_80
TTGAATGGTTCTCTACAGCACCTCCGCCGTGATCCCCGATCGTGTTCTGATCGTGGATAAGCGTCTCGTTCGCGCTGACG
>Locus_49785_92
GTCTTGGTGTCATTTCACATCAGGCTTGCAGGCTGACAATTAGCTTACCTCTGACCACCTGCGACAACATAAATCGGACAATTGACCCTCTC
>Locus_49784_111
AGATATGTAGTTTGCTTTTCTTAGGATCTGGTCTCTCATTTGGTGGCAATACTATGTCGCTAATTTGAATAGGCGCGAGGGGACGAACGTTTCAAACACCGATAGGCAAAA
>Locus_49783_99
TAAAGTTGAGTCTAAAATTGTATTTATTTTAATCTCATACTAGTAATACACAATAACATTTTATATTCAAACAGACATTATGTCAAAATTTTAATTTTT
>Locus_49782_74
ACGGCAAGGCGTATGCTGAACCTCAACTTGCCCATACTCGTGGTCATTTTCACTTTGAAATGAACAGATCGGAA
>Locus_49781_107
AGAAGGCTAGATAACCAGTATTGGAAGACATTCGATGCGGCCATGAGATTCTCAATATATTGACCGAGAACTTGATTTTCGGAACGTAATTTAAAATTCTCTTCTTT
>Locus_49780_71
ACCTTAAAACCGTAAAGGTTATGATATGCTCCATGCTGAAGATCTGCACAATGCCATCAAGTCCATGTATC
>Locus_49779_125
CATAAAAACAATATTAATAAGGCTATATGACTTCTCAAGGCAGAGAAGCTGATTCTGCTGATCCCAGTTTGTCCTCATAAGATGGAACCAGTTGGGAAAAGTCTCTATATTTTTATTTTGTACTT
>Locus_49778_96
ATGTTGAATGGTTCTCAGAAATTTTTCAGATCAACAACATGGGTGGTGTGACACAGAAAATGACAGATACAGTGAAGAAGGTGCCTAGCTTAGGTT
>Locus_49777_90
GAGTTTCACTTGTCACAACTACCCCCTCCTGTGAAAGCAAAAACAATATTATGTGGGCTCCGAGCAGGTGAGATGCAATCACAAAAATTT
>Locus_49776_182
CGTTCCGGGTTTTACAGCCGTAATCAGATTTCAATTCGTGAAGGTGACCTCGAGGCTTTCAGGAACAAACGTCTCATGATTTATTGACAGGCCTTTTATATTTCATAACGGCAGCGTCCTGGCAACTCAGATGACACGTGACCTGGCAAATGTCATGGACGGTCATCTGACATCCATCCACA
>Locus_49775_91
GTCAACAGGTAGAAATACTGAATTGCTTATACCAGTTCAACATTTGCCAGTGTCCTTGATGTCACACAATGGTCATAAAGATGGACAACTG
>Locus_49774_101
TGAAATATCAGTTACATTAAAGACCTGAAGTAAAGCGAATTTTTGACCTACACAATATGAGAATTTATTTATAGCACTTTACCCCAGAAGATGAATAGTTA
>Locus_49773_79
TGGTAACAATGTCTGTCATTTGTTACTTCACCACCCTAACTTTCAAACACACACATCAAACCATTGTTACAGACAGTAA
>Locus_49772_249
CCTTACTTATATCCCTTCGTCAACTAAAAAAATGTTTACAATTATTTGACCACAGCAGAGTAGATAATATCACCTAAACAAAATTAATAAGTCAGTATTATAAAAAATAGACTAAAGTATCACCACTTTCTAAAAAAACAATTATTTAATCCAATACTATCAATAAAGTCAGTGAAAGCAGAAATGATAATCATAAGATGTTAATTGTCATAAACTGACATTTATAAGACTGGTACAGCATGATTACCC
>Locus_49771_80
GAACTCGTACATATTTCTTAAAACCCTCATAACTTTTTTTCCAAGCTCCCTCTCTTTTCATGTTAATACTTTCATTCCAA
>Locus_49770_93
GAAGGCTAGAATTGTTTAATTTAGAGACACATCTGTATTCAGTTTGTACTCAGGTTGCAATGCCTGCTACAGGCACCTCTTTAATGAAATCTT
>Locus_49769_199
GGCAGGTCAATGGCGCTGAATTGGACGGCCAGGAGCGCTGTAGCACCGTGAGAACTCTTCTGTCAGATGGAATGATCACGTGACGTTTAGATATACCGCAAATGTTGCTGCAGTGGCCAGTCATGGGTTGGTTCATGGGAAGTAGCCGCAGAGGTGTGAAGCTTGCGGTCTGCCCGACGATATCTGCCATTGGGGGCGC
>Locus_49768_153
TCTCGTGGCCAAATAAGTTCGTAATCGCTCGAGCGATTTCAAAACCTACACCTAACGATGGTTGAGTCACTTCAGCGACGACCACCTGACATTGAGATAACCATTGCATATCACGTTCGAGTATTTCCGCGTCATTCAAATTCTTCTCTGTTA
>Locus_49767_101
ACCTGACCTTTCCCCCAGAGTATACTGTCTCAGTGTCAACGCCCACTGCAGCGTTTCGTTTTTATAAGGTTAGTAGCAGTCAAAAACTCTTGACCTTTCCG
>Locus_49766_91
AGTACGTTCAACTGATGAAAAGGGAAAACAAGCTGTATAATCACAGCTTAATAATCACATATATTAATATGTTAATATGAACCTACGTTAA
>Locus_49765_77
GGTTTTGATCGGTGACTTGGCACTGTACGAACCAGGTGAAGCAAAGCCCATTTTTCCAATAATTCTTTACGAGTTGC
>Locus_49764_103
AGAAGGCTAGAGAAAGAATATGTTCATTAGCTTGAGGCATTTTTCCTCAAAACAAGTCATTTTGCTTGTAAAATTTATCTGCATACATCCTCTAGATCGGAAG
>Locus_49763_90
CGTATTGGTTCAATAAACCAGCCATGTCATTAAGTTTATGTTGCCATGGTCCTTATCATTGGCCATCTACTAAATAAGGAAAATTAATGA
>Locus_49762_158
AAAAAAAAAAAAAGTCTACACCACACAGTGGTCATCAAATCAATCCTCACTTTGTTAGCTGTTTGTTATTATTGTACATTTTTAACCCTTCCGTCCGATTGGCCAGTTTTAAAATGAAGTGATGCAAGGATAATAATGATTACTTGATAACAAGCTTC
>Locus_49761_116
GAAGGCTAGATACAAGACAAGTCACCAACTAAACAAGATGGCCGTTTGTCGGCTGGATCCTTGTGGAATTATTTGCATCTTTATCACTTATGTTGCTATTTTTTATGCAGATTATG
>Locus_49760_107
AACATAGCTCTCTTCAATCTCAATTAATTTTAAATTATGCTACAGTTACCGCACTTATTCAATGGTAAAATCAACTAGTAAGCTTGAATCTGTACTTTGTAGGAATT
>Locus_49759_97
ACTACCGAAGAAGTAACGGGGCCACTGAGTACAAAGAGGTCAGTCTACTTTTACTTGGAAAAACAGGCAATGGTAAAAGTGCTACAGGAAATACTAT
>Locus_49758_118
CGCTAAAACTGAGGGACTTCAAATTCACGGAAGAGTCTCTCTCCAAGTCTTGTGACGTCAAGTCTGGAGAGAATTGCGACGAAAAAGAGACAAAATACGCTGAAACCATGAAAGCTAA
>Locus_49757_134
AAGGCTAGAACAAATAAAGCATGCCTGGTTATATTCGATGTGTTAAAATATTACCAATGCCTCATAATAATTATAAATACTTGCAATATAAGTATAAGAAAAATCAAGGTCTGATTATAGATAGATTGCCAAAG
>Locus_49756_96
CCCACGTACCTGGGGTTTTCAATTCTTGCTGTTTAGTAACAAAGTGTTCTTGTTGTTCTATTGATCATTATCTGACACACCAAACCCACACACCCC
>Locus_49755_116
TCCGCAACTATACTCTTAGGATAGTGAAACGATGATCGAGTGAATGCAATCGAATGTCGGGCTAGGGGAAGCTTTCGCTGCGACACATATTGCTAGGCCAAGCAGTGCACAAGCCG
>Locus_49754_86
GTAATTCCACTGACCTTTGTTGACAGGACAGACATTAAAAAATCAAACTCAAACAGTTAAAATTTCTGCCCAAGCCATCATAAAGC
>Locus_49753_144
TAAAATTTCACATTGACTTAGCACTTCTGTGTTATGAACCATAGTGCCTGTTCATATTTTGTATAGTTGCATGAGTTATACAGAGGTTCCCAAACTGATTATTGTGATCCCCTCACACTTCACTGTATGATTATGTTATTAAAA
>Locus_49752_99
TTTCTTTCTCCCTAATATTTGAGAATTTAAATTATCTTAACGATCTGTGCACTTTGATACAATGCAACTCTTGTAACAAAAATAAAATAAAATAATTAT
>Locus_49751_151
CGTAAAAATTCCACAATTTGAGAATCAGGAATATTCGATGTCATCCTGTTTACCAAAAAGGTGAACACACGGACTCGCCTGCTGTCTCCAGCATCATCAACGTTTATTGTGTAAACACTGTTGGAGTGAGGAATGAATACCAATATATCCA
>Locus_49750_261
TCTTTTTTCTAGGTCTAACGTCGTATAAATGATGAAAGAAACCGACAGGTCACATTTACAAAGCGAAAATTTGGGCTGATGAAAAAGGCTTATGAACTAAGTGTCTTGTGTGACTGTGAAATAGCCCTCATCATATTCACCAGTAATAACAAGTTATATCAGTATGCCAGTTCAGACATGGACAAGGTGCTCCTGAAGTACACTGAGTATAATGACTCTGTTGTTAGTCAAACTAACAAAGATATTGTTGATATGTTGAGC
>Locus_49749_166
GAGTACACGGCGATCAATACTAAATGAGAAACGTGCTCGAGTCTCCCAGCTAGACAGCCTTGTCGATCAATCCGATCGCTCTTGGTCATTATCTGCAGACCACACCAACAAACATCATCTCAATCCTACATCAACAGCGCTGTTTGGCGTGCCGCACTTGGTGCGC
>Locus_49748_71
CGGAAGATGTAGACACAGGTAAAGCTGAGCACACAATAATATAAGAGCGATGTAATGCTAGAAGAATGAGA
>Locus_49747_120
CCACCGCGTAGAAATAATAACCAACAATGTACATGTAGTTAGTTATTTAGTTATATAACAATCACAATGAAACATTCTTCAGCTTTACAAGTTTTAAGAGTGATATGACACAGTTAAAAA
>Locus_49746_124
AAAAAAAAAAGTCTTGTATTAACGTAAACAGTCTGTCATATTAATATTACAACTATTCATATTGTTATTTAACATGAAGATATGTCATTCATTCCAATCATCACAACTATTTTTTTTCTTTTTC
>Locus_49745_73
TTCTTAGCTTTACAAGTGCTCACAGTGGACATTCCGTCGATTTTCGCATCCACTATTTGATACAGGCGCGGTG
>Locus_49744_100
AACCAGAAGTTGAAGAAGTTCTCGCGCTGTCGCAGATAGTAGTGCTTCGCCTTGATCTTACGCTTCTTTTCCAACGTGGCGACGACTGTCTCGTATTGCC
>Locus_49743_91
ACCTCGTGGTTTATACGAAACTGGTAAGTTGATGAATCTACTCTCAAAACAAAATTGTTAAATCTGATATGTAGAAACACAAGATCGGAAG
>Locus_49742_87
ACGACTACAACAATAAAGACGAGGAGGCATGGTGGGAGCAGCTATGGCCTGCGCCCTGGCAAACAACAAAGTACTAAAAAATAAAAG
>Locus_49741_159
ATTTTTATGAAATTAGGAGGATAAATGACCTCAACTATATGAGATAAATATGGAAAACATAAGATATCACTTTAAGTCCCATTATCTATTCCACACAAAGTTACGTCCCAGTAAATCAAACTGAAAACTGCTGAATCCAAAGAAAGTTCTCTGGCTATT
>Locus_49740_79
CTTTTGTGGATCGTGAACAATCCTGAAAACTAGTCGACCAGCTTTTCTCACATTACGTTTATTAATCGCTAATAATCAC
>Locus_49739_170
CTGTACAGTTGACATTTCTTGCACCGAATTGTTATCATTGGAGAAGGTGGTGTCGGAAAGTCCGCTGTTACCATCCAATTTGTCCAGAACAACTTCATCGTCGAGTACGATCCCACAATTGAGGATAGCTACCGGAAACAGGTGGAAGTTGATGACGAGGTTTGCATCCT
>Locus_49738_90
GATATTAGTAAACAGAAGTTTGCCCCTCAAAAACAACCGCACACCCTCATCACATGTCAACAAAGGATGTACACAAACGAAGGGTCAGAA
>Locus_49737_156
TCGTTACGTCTGCAGTCGTTATGGTTGCCCAACCAAATAAATTTTCAAAGTTAAGATCACGTCAGCAGTTCGAGAAGTCTGTTTTTATGAAATTTAAAACACCATTGGACTTCATGCCCCACGTTAGACTTAACCGGAGATCCTAGGGCTGTGATT
>Locus_49736_71
ACAATGAGGGGAACTGAAGTACTATAAAGCTGCCTTATTTATATTTCCTGGATTCCTGTCTACCCCTAGAG
>Locus_49735_107
CTTCTCCGACAGATGTTGGTGGGATATCCGTTCACACAACACGACAACAGAAATTTTTTCCAAGATCGAGGTGAATACTTTGGCAATACGCCCGACTCACAGCGAGA
>Locus_49734_83
CCCATTAGAGCAACGACACATTTCCTCTCGTCCTGGAAGACGTCAGGTGTACGGTCCCCTGGAGGCAGGCCCCTCGGGATCTC
>Locus_49733_143
GATTTACGGTAACTCTTACGTCGCTAGTAAATGTCAACATTATTCACAAAAGCATTTTATATGGATCATGTCAATAAAAACTTACATCAAATATTTACAAAAATGTCAGACGCATAACAAAGAAATAAGAATTACCCTGTTAT
>Locus_49732_83
TAAGAAACAAATAACAAAAGTTGCCGTTTAAGGGTTCCTTGAGGAAACATTGCCAAGTAACTAGCTGGGGCATTTATTTTTTT
>Locus_49731_71
CAGTTGCATTGTAACACACTTTACACACCCCCCCCCAAATCACACATACAAACACAAACACACACAAACAC
>Locus_49730_71
CTTTGTAAGCGTCTTTACAGCTCAACAACTTCAAAAAGTGTCATAGCAATTGGATGAATAAATAATATTTA
>Locus_49729_83
AAAAAAAATAACTTCTCTGTGTTGAAATCAACATGCACACAATCTCCAGTCGTTGAGTCAAATAAAATGTTTTCACCATGACG
>Locus_49728_102
TTTTTTTCATTTTTTGGAGGTCAATTATTTTCCCAAGAATTTAAATTCCAAATAAAATGAGTTTGTAGGAGCCTGGAAATGTTTGATATTTCCAATGAGTTA
>Locus_49727_100
AACCTTTTTAATTTACTCTACTTGAACAAGAAACTCAATAGTAGCAACCAACTTTCAAAGGTTGATGATGTTGAAATTCCATTGGCTAAACTTGCTGACG
>Locus_49726_104
ACACGACGTGGACGAACATTGCCATCTGCTCGATTTTCTAGTTGGCTTAATTTCACATCCCGATCGAGAACTCGTTCCATATTATCTCTCATCACATCCACGAC
>Locus_49725_151
AGCCTGGACTTTCAAAATACCTTAGACTATCAAGATGGTAGACAAATTTATAACTTTTAAATCTATAGTATTTGGCCTGTTAGTAGACAAATGGGATTATCAGCTAATCTGATTTTTCTCTTAATTGACGTCTGTAAATAAGATCGGAAGA
>Locus_49724_84
AAGGCTAGAGAGTCTGGCTGAAGAATAGCAGGCTTTCATTATAATTGCCCACCCACAATTTTTAATAAACAATTCATGTTTATT
>Locus_49723_96
GTAAACAAGAGTCAGAATAATGTTGACAAAGGTCAGGGGTCTCCCCTGTAAGATGTGCTATTTCTATTATAATTTACAATGTTTTGTTGATTGCTG
>Locus_49722_94
TCGACAAGAAGTAGTAGCAGATCCCGGGCAGCATGGCCAGTCTGCACGTGCTGGAGAAGGAAGAGTTCAGAGCATGGGTCATTATATTACAGGC
>Locus_49721_76
TCTTAAACCATTAAAAACAACTTGCTCTTATAGCTATTAGTTCAGTATGCTCTATGAAACTCAATAAAGTATTAAA
>Locus_49720_81
TTCAATTTCTCTTTCTACGTATGATTAATAACTTAAAAAAATCATAACAATCCATAAAATTTGTCGAAACCAAAACCACAC
>Locus_49719_151
TACTATGGAAGCCACTACTTAGCATGTCTGGTTTACCATTTATCTTCGTTGAACGTTACATCCTGCAACATAGTGAAACACTTGATGATGCTCTCTCATTCATTGCTGATATACGACGAACATGCCATTTAATTTTGGGTGTGGCCGATGG
>Locus_49718_93
AGACTACTGGATACTGAAAACTGGTCCCAATAGACCAGGTCCCAATAGCCCATTACAGTGGGTCAAGGATTGTATATTTAAACTGGCTCCTGA
>Locus_49717_271
TGCAGTAGCAGTACTAGTTCATGATGGTGATAGCAATAATTGTCGTCTGCATATAGCAGATTTACCTAACGATTGTAGCAAACGTCAAATTGAAAAAGCATTTGACAAATGGCCATTGGTTGAAGTTTGGCATGCCCAAGCATCGTGTTTCGCGTTTGTTGTTCTTCGCAATCGAGAAGATATACAACCAGCAATAAAAGAACTCGATGGCCGGTTTATTGGTGATGCACGCGTTCGAGTCACTTTAGCTCGACCACGCATGCGTGGTAGT
>Locus_49716_83
CTATACCATACATGTGTTTAGGACGCAACAGACTATTTTGCTGAACTGAATGTGTATGAATGTGGTGTGTGGCTACTTACAGA
>Locus_49715_112
AAATAGAGTGTACAATAGTAGATAATTTGTTTTCACCCCAGCCAGTTTAGTTATCATTTGGTGACAGCAAAACCTGTTATTATTTGACCAAACACTTAATAGTTTCACAGAT
>Locus_49714_197
ACCGTCAAGTCACACTCTTGAGGGGTTGGGCTTGAGTTTGATAAAAGGGGCCAGAGAAGTGAAAACAAAAGTTTCTGAAAGTTTTACAGAGTGGGACAACAAAACCTATCTGTAAACTTTAAGAAAATCATAGTTTGTATATGTAATTGTACTGACGTCAAATTATGATAGTAAAGATTATTAAGAAAATACACTGT
>Locus_49713_105
ATAATTTTTTTTATGTAACGAAATATTAAAGCTACGAAAATATTCATGAAATGTTTTAGGTATAAAAAGTTATTTTGTTCTGTACTGGGACCATCCTTATAAAAA
>Locus_49712_166
CTTCCCCTGTTAGAGTTAAATCAGTGTTTCGCCACGGGGACACCAACCCCAATAATGAGTTTAATAAACGACAAAGGCGTCACCTTGTATGTCAATGAGATGCCCGGCACTCTGGATTACTATATTTTTTCAATTTTCTGCAGGCAATCAGGGGCGTACACATGTT
>Locus_49711_126
AGTTCAATCGTGACTGATCATGCAAAACATTTTTCTTGCTTAAAAGAAGTGGAAGCTGGGGATTTTCCAGAAACAATTTTGTCCAGCCAGCAGTGAGTTCTGGCAAAATATTTTTCTTGCTTAAAA
>Locus_49710_89
TGTCCATTTGTACAATTTTTTACAGTTTTGAAGTTAGTGATAGTGTGTTATATCTGCAAAGCTTAGACTGTCTGGATTTTTTTTTCTTT
>Locus_49709_146
TCCCGTGTGGGAGAACACACTCGCACCTTATCCGAGGTCGTATTTTGGTCTACTGGGTACAGAAGGTATAGAGTATCTGGCATATAGGACATTTACAAAGGACAAGTGAAATAGAAACTAAGTTTTCAAGTAGTAGCCGAAGCAGA
>Locus_49708_79
CCTATTGTCCCATTACTTTGCCCTGGACACCGTCGTCTTCGACACGATCCTCACCAACAACGGCAACGCCTATGACCCG
>Locus_49707_73
ATAAGTTTCTGGATTGTTGTTCATCACTGGTCCCATAGTGTTTGACATCATTAAGACTCAGCTTGTACAAACC
>Locus_49706_166
AAAGTTAATTAAACATAAAAAAGAATTTACTTTGTTTACATGTTTATTTCTAAGTTAACTAACTCTCTATTTCAAATTTTTAAATAAGTGATTACAATTTTCCCAATTTTTAAAATGCTTTGCTCGAACATGGGTTAGTCATTGCCCTCCATGGCCATTTTCATTT
>Locus_49705_86
TTTTTTCTCACTAAATAAATATTGAACCTACAATGAGTTGTAAAGATATCATAAAAAATCAAACATTGAATGACCATGATATTTCT
>Locus_49704_71
TTTTTATTCATAAGTATAGCTCTCCAGTGATTTCTGTTCTTTGGATGTGTGGTGAGACGATGGCAAGGTTG
>Locus_49703_77
AAACGGCACTGTGTACGTGTTGTGGCTTTGGTAACTACTTCACTGGTCTTCACCTGCATCTATGGTCCTCATATCTA
>Locus_49702_114
AATATTACCGGGCCGTGGCAGAGCACAAAGTGAGGTAATGAGGAATCAAGTGGAAACAACTTGGTTGGATCTGACGTGATATAGATTTACAGAAACCAAACAACAACGAAGAAA
>Locus_49701_84
GATGTGTATCTACACATAGTGGTTTCTGCTTGAATAAGAAGATGAGGTTTGTCAAAGTCAAACAAGAAAAGTCAATAAGTCAAA
>Locus_49700_116
AAAATAATCTTTGTATCAAATTAAAATACAGTGTGCATTTGAAGGCAATAAAGATATAGCGAACAAAGGCAAACGTAATTATAATACATACATAGGCAATTGATTTCTTCTTGGAA
>Locus_49699_140
TAAGGTAGCAAACACCTGTTATCTGGATACAGCTTGTTCTTCTCCGCCATTGGACACTTGCTGTCTTCGGTCTTCTTGTTCTTTTTGGGCATGGGGCACGATTCGGGCATACGAATGCCGATCTTCGCTCCGAACTGTTC
>Locus_49698_199
CTGTGAATCTCATTGGTTTACACAAATGACACCTTTAACTTTAAGTCATGTAAGTGAGTTTTTAATTTAACACATAAAGTTCACAACTTTGATGGTTACTTAGCTTGTTTGGATATCTCACATTCACAAAGGTCATAAGTTTACTTCCAGAAAACATTTGTCATGAAACTACCTCATACTCATAGATGAGTTGATTTTT
>Locus_49697_137
GTCATCACCAGTGCAAGGATAAAAATCTGATGGGGAGTTGAGTGAGAATGTTACCGTTATAGAAATAAGGTCTGTAAAGGAACATTTTGGAAACAACAAAGCTTCATCTTCAAGAGAGGATAGAACTGTTACGGCTG
>Locus_49696_140
AGATATAAAGACAAGGAATGTTTGGTTATCAGATTTTCAGTAGTGCAAACAATTTATGAGCACAAAGGACAATTGGTTTAGTAATAAACTTTTGTATCATGCAGCAGTCCTGAACTGTCCATACCAACATTTGTTTTTTT
>Locus_49695_81
ACGTTAGCAACTAATGGGCTGCATCGAAAATGATTGACCGAATACCTGATAGTCTACAGTCTTCCTTCGCTACATGTTTCA
>Locus_49694_74
GGTGGTAATGAGGTAGACCGAAAGCATTAATGCACCTTCACGCAACCTTGAGTGTTTGAATAAATGCATCTTCT
>Locus_49693_82
TTTCTCAAAAGAAATACATAGCTGACAGAACAGCATGGAGCCAATGTTGAATTTTTTACTATAAAAAAACACTCCTTTGGAC
>Locus_49692_310
TAGTTCCTACTTTCGTAATTAAGAGCTAAAGAAGATGATGAAAAAAGAAAAGAAATCTCAGCTCAGTTTAATCACACCATCGGTGAGATCCAGTCCCAGATGACTGACAACAGTGAGAGAAACTCAAAACTGAGGCAGGAGAATGAGAACCTGGCAGCTCAGCTGAGGACGTTTATCAAACAATGTGAAGTTCGTGATTTGCAAGTGGAGAAGCTCCACGAGCAACATGAGTTGGAGAAGAAATTGGCCGAGGTTAAGATGAACCAGGCTCAGGCTATAATCAAGGAACAAGAAGAGAAATCTAACTCTT
>Locus_49691_196
CAAAGGGTGATTCAGATAGAGCCTAAAACTTGTCACTAAAAAAGGCTGTAACTGTTTCTGCTGACGTTCTACTAAAAAGAAGTATGACTACTGTAATAAGAGGCTCACTAACTACTAACATAGTCTGATATGTTGTATACGGAAAATTTCACGTAACAATGTCTGGCTTATTACCTATGACGCTTCACTGTCAAGA
>Locus_49690_120
GAGCAAAGTGACTTAATAGACAAGCAGTTCAACCATTACTCGATGCTGTTGTTACTGAAGATGCTGCTCGTCTCATTGAACATCAACGCAATAGTGATTCAAACTTAAAAATAAATAACT
>Locus_49689_75
TGTGAGGAGAGTCTTCTAACTTGCGACCTACGTTCTAATAAGAACGCACAGCCCATGCTGGCCTGTTTGCAAGTG
>Locus_49688_74
TTCAGAAGTACAGCTCGTTGTATGATGAAGGCATGTTCTACCCGATTATGGTCGACATCTAGTTACAAACATAA
>Locus_49687_152
TATAAACTTACCTACAAGGTGACATATCATGTCATTATATAAAGGTGTAAAAATCCCAGGCTTTGACCCTAGCTGACCCGGAAAATAAATTTTTATTTTGGTGGTCCGTAGTTCTAGACGATGAAGACATACGAATGAAACAATGATCAGCA
>Locus_49686_73
TAAATACACGTTATTTATTTATATATCCTATGTAATAATTTGATTAACAGTCACTGTAATAAACAAAACAAAA
>Locus_49685_137
GTTCTTTCGCATCGAAAACTCAGACATGCGTAGTGGGTCTGACTGTAGACAAAACATGTGATAAGAAATATTTATGTATTTTAAACTCATATAGTTCAGTACCACAGCTTACGGTCGGGCTAACCACGCTATAAAAA
>Locus_49684_94
CAAATGTTTTACTTCTGTTCCTGATGCGGTTTCTAATATTCAATTTTTGTTTTACCTGATGTCTTGATATTGAAAGATGTTGGCTTGAAATCAG
>Locus_49683_82
AACAGATTATGTTCGGTGACGCAACTGAAAGGATTACATTGTTTCTACTATTTATCTACCCAAACTGAAATTCCAGATCGGA
>Locus_49682_101
ACTCATAGTACTAAAAGCATCAAAGCAGCAGTGCTCGTCAAGTACCATTGGACGATGACGATGACTTTCAAATATCCGATACCAAGGCCAGAGAATTCTTG
>Locus_49681_112
GGTCTAGACTTTTTTGATTAGGTAAGAACCTCAAAGCAACACCTGATTATGAGGCTCTGAAAAAAGAGTCTGAAGCTTTTCAATTGAAAGTGACAGAATTTCTGACAGGGAA
>Locus_49680_175
ACAAGTTCACTACGAAAGATCACATGTGACAATGGCCTAACAACTCGGCAAAGTTGGTCAGAACACAGAGCCAGAATTTTCATTGGCCAAGTCATCTACCCTGCTGCTGCGATCTTTATGCCGGGATTTTTCTGGTTTTGAAGATTTGGATTTCTGAGGTATGTTCAAGTGATGC
>Locus_49679_106
AAGGCTAGAGGTCTAGATTGCTTAAGGAATGGCATCAGTAGTTATTTAGTCTCAAAGATACAACTTGTACTGACTTGGGAACCTTCATTTGTGAGGACAGCCCAGA
>Locus_49678_125
AATTTCACAAGGTGAGGACGCATTTCTGGCCATTTAAAAATTATAACTTTGGAATGAAAATTGTGTATTGATTTTTAGGGTATGTATCAAGTTTATTTGTATTTAGAATTAAATTTGTCATTATT
>Locus_49677_113
ATAGGACGTGAATACTTAAAAGCTTGTAGAGTCAGATATCTATTTCAAAATGTTTGACATAATAAGGTAAAACATCTTTGAACCAGGCTTGGCAGCCAGTAATGTTCATCTGA
>Locus_49676_79
CGTTTTACATGTTAATTAAAAGAGCCTGTTAACTTTCGTGTAACTTGTTTCGGGTATTACTATTTTAGTATTAGAGCCA
>Locus_49675_88
ACCACTAGAGGCGGTCTGTCTCCAAGCATCTGTTCCAGAAATCAAGGGGAGTAAACTCCAATGTTTCAGTTATACCAATGACGTCATC
>Locus_49674_109
CGGTAAAGAGGAAGAGGAGTCAGTTAAATGAATATTTCTTCTACAAAGACCTTGCACCAGTTATTACACAGTCTAAACTTCAAGTCTACTCCACCATGGGATCACAACA
>Locus_49673_158
TAACAAATTTCAATTTTTATCATCAGAAAACCCAGTCAAAATGACATTAAAAAAATACTGCTTGTGTTCAGAGATGAAGAGTAGACTTCTAAAAATATCCTAGGTTTTGTTTCTGTTGTTATGCCCAACCAACGAAAAATCAATATCACCAAGCAAAA
>Locus_49672_98
ATTATATGCATAAATTTTAAGCAGAACTCTATAACTAGTTTTAGTGGGGAGTAAATTGTATGGATTTAAGATGACAAAAAGTTACAGCCTTTTACGAA
>Locus_49671_86
TTTTATTTGTGAAACAAACCAGCATGGGTTTGCTTGTGTACTTTGTGGATCACTACCCAATTATTGGGGAATCCTTCCCATCTGAG
>Locus_49670_122
TTTTTTTTTGGTTGACTTTATACAAGATGGGAAGGTAATTATTTTCTGATAAACTTTTAAATTGTCTGCGTTGTTTTTCCAAGATGTTTATAGCTTGTGTGCATTATTTACATTAAGCCTGC
>Locus_49669_92
AAAAATTCGCCTCACGTAAGCACATACTATGATGACCCCAAGGACACCTTCATTAGGCCATATTGTTGCAAGTTTGTTGGCGAGATCGGAAG
>Locus_49668_85
TAGACTTGTCCTTTATGTCGTTCATAGGTTGAACATGCATTCATTGACTACAGCAAGCAGTTATCAGTTTATCATAGACCTTGCA
>Locus_49667_421
GCGACTTTATCAGTCTCTCTCGACCTATAGCCAGGGATACTTATTTAACAAGTAGGGACCATAGCTCGAGCGGCCAGCAAGCAGGCATGACAGTCTGGTCTGCTTTGACCCGGTATTGTGAGGGGCGTACAGGGACCAGAACTGACTCGGGGCTTTTGCTGACGATGCTCATTTGCCTTAGTAGCGTGGAGGCCCCATAGGTGCAGGCATGAAGGCGCCGAAAGGATTACTTGGAGGAGCGCCATATCCAGCTCCTCCACCTTGCTGAAGCCTTTCCAGCTTAAAGTCGAGTATGATACTCAGCCAGCCGCCTTGAGCGCCCATCTTAAGGCTACATCCTTTGGACTGGAAATGCGGCCTAAGCTTGTCGAGCACAGCATCGGCCTGAATCTTCCGTTCTTTTTGAAATTCTTCAACCGCG
>Locus_49666_109
TTCAAGTTCCAGGCGACGAGCAAGTACCTGTACACTCTGATTATGACCGATGCGGCCAAGGTTGAGAAGCTCCGCCAGTCGCTGCCCCCTGCGCTCAAGGTTGAGGAGA
>Locus_49665_105
CAAGATAACTAGGTAACATTCTGGTTTTATTGCCCAAATTATGATTTTGATGAAGTACAATCGGATTCACAGTAAGGGCAGGACCAACATTGAATTCATCGTTCT
>Locus_49664_71
ACTGGCACAGGCACAGGAAATGGGCTATTACTCCTGCTTTTGCTTCCTCCTCTGTGTTTGTGATGACCGTG
>Locus_49663_123
GATGTAGATGAGTTGGTTCAACTAAACGTCAAATCAGAGTTTTGATTACACCTCTAATCGAAGTCTGTGATGGCAACTGCAAGTCTTACTGGAAAATTGTCATTGATAGAGACACACAGTCTG
>Locus_49662_87
ACTTGTAAACTTTTATTATTAGTTCTGGATTTAAATAGTGGATTATCTGCATTGCAAGAAACTCTGCTGACATTCTTTGGCTTTGGG
>Locus_49661_85
AGAAGCGTATCGGATCTGTAATTTTTATTATAAACCCTTGACTAAAGTAACGTGTTGTGATTTGCATGAATAAGGAGAACTCAAG
>Locus_49660_123
TAACACAACCGTCAACTCTAATTGACTTCATTCAACTATTTTAATCATTTGGCATAACATTTGGCGTGAGCGTCTTCAAAGAATTCCACCTATTATAATACCATTTACACATTTTTCATAACT
>Locus_49659_135
AAACTCAGCTGTAGAAGGTATATCACACATACTGATAATACTAATTAAGGTTTTAAAACCTCAACATCTATGATATTTTACCTAAAATGCATTTAACTTTTTACACCATTTAAGACTACATATTTTTTTTTTTCA
>Locus_49658_86
GCTGTACCCTGGCACTTCTCCATTTATTCCGCTATTCATATAAACGTTATCTCTTCTTCCCAACAGGCAACAGCTTACATCACAGA
>Locus_49657_108
GATTATAAACGAACGTAGGGGGCATGTTCTCCTCTCATATTCGACACATTATCATATCCATGGCCTTCCACGTTTTCCAAAGGCAATGCCAGCTTTTATCAGCTCTTG
>Locus_49656_81
AGTGACCGTTGCTGACGAGTAAAATCCAGCTGCCGTCTTTATTTCCTCTTACATGATGCTCAGCATGGACTGTGCATTACA
>Locus_49655_100
GGCAAAACTGCCCAGTGGGATTAAAAAACTTCATTTCATTATAGTTCTTCAGTAATAATCAACACATTTTTTCCAGTCAAACTCAAATTATTGACATGTT
>Locus_49654_137
AGTTCCGCAGACAGTTTTTTATATGATTCTTGAGAAAAAACAAAGTTGAAGAAGTTATGCTTTCATAATAAAAACTTTGGAACAGAGCAGCATGATGTTAGTCAATACCTCTTACTTAACTATAATGTAGTGATACT
>Locus_49653_99
CCGGGGAACTTAATTACAAGTTTGCAAAGCATGAAAGGATCAAATCAATGGGAATAAACAGTGACGCAAGGCAGTTGTAAGAACTGAACTTCATTGTAT
>Locus_49652_164
GCCTAACTTAGAACCCTTGTGGGTCAGTGCTTCCGGTAGGTTGATGTGGAATTCGGTCTTGTCGAATTCGTGGATCTGCAGTTCGAGTTTCTTGGCGTCTCTGACGACATCTTCCTTGCCCTTGAGTTCCAACAGCTTCCCGAAGAGCTTACGGAGATCGGAAG
>Locus_49651_95
ACTGTTGGGGGTAGTAAAATAGCCCAACTTCTCTGCTGCCAACTCCCCGAGTTTTGCCCGGGACAGATTCGGCAGCTGGTCCTCAAAGAACAGAA
>Locus_49650_76
GTAATCTCTTCATGTCTCTATCTGAATAAGTTAAAGTGAGGAAACCTTAGGATGTATTCAACAACAACAAAAAAAA
>Locus_49649_97
GAGAAGGCTAGACGTTCTACTTGTTACACATCAAGAGCAATTGTCAAATATGTCCCGCCAGATTGCAGCTTACCAAGCAGAAAAGAATTCACAGTTG
>Locus_49648_95
GACAACGTAATCGTGAGTGTAAGTTACTAGCTGGTGGCCTTTCATTTCAACCCCCACTGTGTGCTCCTCAGCCTAAATTAAGGTAACAGTAATTT
>Locus_49647_138
AAAGTATTTTACATAAAATATTAAATTTAAGCTTCACAATTAAAGATCATATTTTATTAGAAATATATGTTAGCCATGTTGAGAGTAAATGTACATTTTAAAATGTTTTATATGGGGTAGTCAAGAGAAGAAAAAAAT
>Locus_49646_119
GTGTAAAGCTTCGCTTTCGCTTTTTATTCTGTGTCGTCAACGTCATAAGTGAAAGACAGGGTTCGTGCATTGACGAGGGCATCCTCCGCAACACTTCTGCGCATTCGAAAAAAAAAAAA
>Locus_49645_106
GTTTCGTAGGAAATTCATAACCATTAGTTTTTCCTGCTATGTGAGTAGCCTCTACAAAGCATTTTTAGCACTATACGTTTTTGTAAATAATTTCGGCCATCATTGA
>Locus_49644_93
GAAGGCTAGAGTTAAGTTCATTTTATCACTGTATTGCCTGCCATTCGTGTATTTGTACTTAAAAGACTATAATTTGTATATTATTTTATCACA
>Locus_49643_121
AAAAAAAAGCCGTGGCTGGCCCTCAATTAGACACCACAATTTAATATAAAGGCTTTAAAAAGAATGTCTTATTAGTGCTTAGGTCACCATGTCCATTNNNNNNNNNNNNNNNNNGTCTTAA
>Locus_49642_107
TAGGACACTGCCTACAGGAGATCCTGTCATACTCCAGTGGTACGACTGGTTTACCCAAAGGTGTCATGCAGACCCACTATAGCTGTATGGCCAATTGCTTTCAAGCG
>Locus_49641_139
TAAAGGTTGTTAACAAAATTATTTTATCGTCAAGTTTACGATTTGTTATCAAATCAGTGACCTTTTGGATTTACATATTCCTGATTAAATCTCACAGTTCAAATAGGCAAACTTACATCATGGCACGTGCAACAAGTTT
>Locus_49640_90
AAGGCTAGAACATTGAGATTTAGATAATAATAAACTTCAGTTTTCAGTTGCTGTACATTTGATTCCATTGTCACATTTATCAGGTACCAA
>Locus_49639_75
CTACATAACTCTTTCTGGACCATAATGTTCACCATCAACAGGGATCTCAGTGAAGATGATAGATTTTCCGTTTTC
>Locus_49638_108
CCCGAACGGGTACGGATAAATTTCCAGATCTTCCGTCTTCACATAGTCGAAATGAACAAGTCTTGTGACCTGAAGGTCATCTCTCAGCTTGGTGTAGAACTGACCAAG
>Locus_49637_117
CAAACGACGATGAAGAATCAACAAGCCTGGGATGTTATCTTAAAATTAGGTCACAAAACACTGTCAACCTAGAATAAAGTTGATAAAAGTCTTACTTGTAGTTTGTCAGGCCCATAC
>Locus_49636_147
GAGACTACTACTACACTTATACAACAAAAGAAGAGAACCATGAACAGAGAAATACTGACACTCTGTATTCCAGTCATTAAAATTTAGCCCCTCGATGGCTCACAAACCAGTTTGCCTTTCAGAAATACAAATGGATGAAGTCCCTGA
>Locus_49635_102
AACTTTTGCCCAAAGAAGCTAGAGTGTCTTACCTTTCATTTCTTGACAGTAATGTGTTAGGTGTTAGTAAGCAATAGAATCCAACTAAAGATCTTATATCTA
>Locus_49634_103
AGTACTAGGGTCTGATTAAATGTCTCCCATATAATACACAGTGCATCATATCATTACATAATTTTTCACTGTACATACCTAATTGTCATAAACAATAAACAGC
>Locus_49633_134
CCCTCTGATAACCGAGCATGGCAACTCATGGGGAACTGGATATGGTGAAAACGGATACATTCGCCTTAAACGTTATGCCACCCCTCCTTGCGGAGTTGACACTACTCCTTCTGATGGAGATGGATGCAATGGTG
>Locus_49632_113
ACAATTTTTATAAATGTGGTCTAACAATACTTGTAAAACACAAACTACAGCATAAGTAAAGTAGAAATTCTGTATTTAATTAAAGTATGCCTTACTTAGTGAGCAAGGTTACT
>Locus_49631_86
TACGATTACTTTACATTTAATGATTGTCATGGAAGGTTAGAGATATCAAAGTTATTTCCTTTTATATATATTAGGGCTGCGGAAAT
>Locus_49630_79
CGACATAACTGGTTGTGCCTGACACGTGCTCCTGGGGGATGCCAGGCACGTCCTTCCCTCTGTTGCTTTATTCTCAAGG
>Locus_49629_117
CGAGCCTGTTATCCTAGACCCAATCAAATGAAAACCTTAACATAAACATGCCATGTGATCTGGTGATGGTTGGGTTATTTCAATCCTTTCCACTGGCACTGTTAGACATTTGTAAAA
>Locus_49628_162
TTTCTAGACTGACAATTTCTAATGTTTGGTAGACAATTAATTCAAGTTCCAGGGATTTCAGCTGAAAGGGCAAGAGCGATTTCAAATGTGTATCCAACCCTCACCATGTTGTTTGAGGCTTATGAAAAATGCAAAGATTCCAAAGAAAAAGAAAAGTTACTT
>Locus_49627_98
GTTGTTGCAGCGAGAGTTATCCGCACTCATTGACTCCGCGAAGAATCATGAAGAAGCCGTCATCTCCCCAGGTGGTGGTCCACGAGTTGGCAACCAGC
>Locus_49626_76
GTCATTGTCTCATTGATTATATGTCATTGTAGTTGTAGTTAATTCAAGCAATCATTTATCAGTAACAGAGTAACTA
>Locus_49625_169
TTGTGTCGGTACGTACGTCTGTTCCTCCATGATCACAAAGGCTATGGATTTGATGTAGATGTGAAATCTTTTGACTGGAAGCGCATCAAGAAGAGCCGAGATGATTACATAAAACGACTGAATGGTATTTACGAGTCTAACCTGGAAAAGTCACAAGTGGAAAAAATTG
>Locus_49624_282
CCTCGGTAATGCAGACACAAATTAAAAAAAAGAATTTGCTCATTTTATTGTAACAGATAAAGGTGGCTGAAAGTTCTAATTACCTGTTCAATGTCTGTGGTATAGTTTTCTCAAAGGAAATGTTAACAAAAATGTATATCATTTCACTCTCTTAATCTATCACTAAATAATACATAATGCAAAGGAAGTAAGGATAGAAATTAATTTTAGAAATTGGTCAGCATCATCTGCCAAAGAAAATGTAGTATTTGTAAACATTGTGTTTTCCATTTTAGATCGGAA
>Locus_49623_105
TTTCTTCTTCTACAGTCGCTATACTGTTCTTCTCGTGTTCATTTCAATACTCGTCAAAACCTACGGCAAAGTGCAGCATAAACAACACAATTGACGACAATGACA
>Locus_49622_110
CAAAAATAACGGCGACAAACACCTCCAATCAGTTGCCTTTTCGCCATGTCTCATCTTGCTGCACCTTTCGTTGCCCGTGTTGCGTCTCGTATGTACGCCACCGCCGCTGG
>Locus_49621_78
AGAAGAACTGAGACGTCGGTAGGTCTTAAAATTTTACAGTAGTTGATTCATTTCTTCTTAAATTAACTTTATGTATAT
>Locus_49620_120
TTAATTGAAACTTCTAATAATTCATTTTGAATTACTCACTGACCCTCTGACAATGCCTTAAAATTTATGCGCATAATTCTCTCATTGATGAAATCCAACAAACAACACAGACAACAACAC
>Locus_49619_157
CCTATAAGGGTTGTTCCCGTCCTACAAGATCAGCAAATCCAACCCTCAGAAGCTGGAGAAGGTTGCCGAGTTGATCGAACCTAGAGTTGACCCGATTGTGATGCTGGTTGGTAACCAGATTGTTGTCGTGGGAGGAAGCGACAAGCCAAGAATGGAG
>Locus_49618_87
AGGCTAGAATGGTTAAATAATTAAATTATGTGTCATTCCAAGTGAAGTATCATGACAGCAAAGTCATTGAGACACAAAGATCGGAAG
>Locus_49617_236
GAACAGGTTCGTCGACTTTCAAAAAGATGCTACCCTACAAAAACTGAATGCAAGTTTACAAGCATTGCAAAATAAGCACAATGATACTGAGAAGGCCCGTGCTGAGCTAGAGAAAGAGAAAGAAGACATTGAAGCCTATGTTGACAAACTACGAAACCAGTTGAGCAGCAGTGAAAATACATGTCGACAGCTCCAACAGAGAGCTGTGACATTAGAAGACATTAACCGTGACCAAG
>Locus_49616_105
TTATGTGATTAACAAAGAATGTCATCAAATGGTTCATAGACATCAGTTGTTTCATTAACCCATTTGGTTCATTGACATCAATTGTTTCATTGACATCAATTGTTT
>Locus_49615_94
TTCACTTGTTTGACAGTTTTTACGATACATGTACGAAAATTGTTTCATACCTTTTGATCAAATATTACCCACAATGCGTGATGACTATTTTTTT
>Locus_49614_73
GGCGAGAAGGCTAGGGGGTACTCGAATGGCCATGGCCATTATTAAGGCCAGGCTTAAGGGAGCCCAAAAAGGT
>Locus_49613_74
AAAATGTTTTATTAGTTTAGAGTGTTGAGCGACATCCAGAAAAACGGATGAAAGCTGCCTATGATGCCTATGAA
>Locus_49612_236
GTCTTCTTTCCTAAACTCGCAAGAAAGACTCCAAGCTAACGTCCAAAGACTCCAAGAATACAAGCAAAGAGTTGTTCTCTTCCCAAGAAAGAAGGGTACCGTTAAGAAGGGTCCAATTGCTGATGCTCAAGTTGCTAAGGCTGAATCTCAAGTCAAGGGAACTGTTCTCCCAGTTAAGAAGGAAGTTGCTGTTGTTGAAACTAGAGATATTACTTCTCAAGAAAAGGAAAGATCTG
>Locus_49611_111
AGGGTCAAGCTGTCTATCCGAACATCTTGCAAATTATCAGTACATGCCAAAAACGTTACATAAGTTTGGGGTGTGCGTTCATTGCGCAAAACAGTTTCCAATTGGCTAATA
>Locus_49610_137
GAAGCTAGTTTAGTACGCAGTTACTAAAATAAAAACAATTTTATCAACTGACCTCAGCACCGTAATTATTTATAAGATTTTATAACACTATTAAAGCAATTGGAATATTTGGAACTGTTATCAAATTTATCTTATCT
>Locus_49609_130
AGACAAGAAAGGTTTTCAGTAAGGAAAATGCCTCCAGCATAAAGCAATCTAAATCTTGTACAAAAATCTACGTATCCCCTACGTGCGAAAGAATATACGCACCAGAACTGCACGGTAGTCGGTAAACAAC
>Locus_49608_99
AGATTATGTACTGATTGTACATGAAAATGGTCCTGGTCGATCACAACAGAAAAACAACAACTTTTCTAATAAATAATTTGTTAAAGCTAAGGAGTGGAT
>Locus_49607_139
AAAAATTTTATTTTTTTTAACCTTAATACAAGAAACTATGTGTGCAAAGATAGAAAGACCTTGCAGTTAATAACTGGCATGTTTATGAGAGTTTAAACGTGATTGCAGCTTTATCCTCTTTTAAAAAATCATTTATTTT
>Locus_49606_139
CCTGTAAACATGTTTAACTCAGATATGGAATGGACGGTCATTCACTAATTGCACACAATGCAATAGCATGGTTTCAACCCTTTGTCGGACAAAACACATATTCTGAAATGAAGTTAGTTTATGATTTTATAAACATGGA
>Locus_49605_114
TGTATCACAGGATCCAAACCAGAGGTTCAGTCTCGGCCATGAAAATGGCGGCTCACAAGATGTCTCCAGAATTATCCGGCTGACTTACCCATCGGATCGGTACCTCAATTTGAC
>Locus_49604_83
AGTCCAAGCGATGCGACTGACAAATTAAAATAGATCAAATACGTGTTTTAAATAAGTCCTATAAGAATAACCAGATATTTAAT
>Locus_49603_112
GGGCGGTGACGTTCCTAACCTTGACCTGTTGCATCATCAAAAGACCATGCGCAACAATAAAAGTTTTCTTCAGTACTGGGATCAACATAAGACTGGAGTAGTTTGATTACCC
>Locus_49602_77
TTTTACAAAATGGTCTAGACGTCACCTAACTGTACACAAAAGAACACATAATGGGGTAAACCTTTTAAATGTGATGT
>Locus_49601_91
AGGCTAGACCTTACCCAACGCTGACTAAACCAAGAAAACAAACACACTTTCATTTAAAACTCTTATTAAATTGCAAGACTAGACATAAACC
>Locus_49600_145
CTTTGTCCTTGGAACAGGTCTGACCCAAAACATAAAAGCTATCTGGCAAGGACAGATTCCAAGTTGCATGTTATCGACGAAACTGATTGGTTAGCCTTTCCATATCCAGGAAAATATGGAAGCTTCCTGTTTAGTGGTGGGGGGT
>Locus_49599_86
GCCCGCTGCTCTGGGACCACCTTGCCGTAGGCACCTCGCATACCGGTCTGCAGACGGTCAGCGCCTGCGCACGACAACATCTTGTT
>Locus_49598_106
GAAAGACAGAGCCACCGTAGTCATCCGTCAGCTGGAGTGCCTGTTAGACAAGACTTGTTATTACCAATGTAGTGCTCATTATCTATTGTCAGAATGAATCATTCAC
>Locus_49597_141
TTAGATAACTTGTAAATGTCCAGTACTCAATACCTCCCTTGTTCAGTCTTACAATAACTGAATATCAGCCCAAGAAATAAACAGATCCTGAATGTAGAACGGTCGGTCCTCAGACAGGCTTGATGTGGTTCAACAAAAACT
>Locus_49596_153
TTTCTTACGATAGTATTAGTCAAGCAGGTTATCTAAATTTTCAGATGCTCTCTTCAGTTTGCATGCACTTGGGTTGCTAGACTACAGTGTCTTAGGACTTCTTCTTCGAGAGCTTGTCCATTTAAAGACAAAGTTTTGCTTTCAACAATCAAT
>Locus_49595_132
AACTCGAGAGATTTTACACAGTAAAACTCAAAAGTTTTGAATCAAATTTGAGATTATTTTAAATAACTACCCGTAATGTGAATTTATGAAAGCTGAGTGAGAATGGTGAATGTTTTTTCGAGATCGGAAGAG
>Locus_49594_123
TTTTTCCACTGTAGCCCAGCACATTGAGGGACTTGCTGCAAGATTATCGTGGTTCACTCTTGCGAGAGAAATCAAATTATTTAAGTATAGGGAAAGTTAGGACCAAGGGATGCTCTTTTTTTT
>Locus_49593_76
CATGAGGTAATCTTTGATTCTATACGATCAGCATGATCTGCCACATGGCAAGGTTGTTACTTTCGATTAAACAAGG
>Locus_49592_114
TCAGTTAATTGAGCTTTAGGTCAAATATACAATTAAAGCTCTCATAAAAAATGAGTGGAAGGAGCTTGTACTATCATTAGAAACTACAGCATTTTTATAGTTCTCAAATATACA
>Locus_49591_134
GAGCATATTTTTGGTAGAGTTAATAGAATATGAAAATAAATGAAATGTTTTCCTTAAACTTAAATCAAAAAAAGTCCATAATAAAATTGTGGAATCTCATGGTCTTATCTATCATATAGACAATTTTTTCCCTC
>Locus_49590_76
TGAAATCGACAAGTGAGACTACTCTTACCCATGTCAAATGAACCTCCATCATTACCTACCACTGAGTGTAACAGTT
>Locus_49589_128
TTTTTCTTTACTCGGTTCAGGTGTTATAAATTCAAAACATGCTGAACTTCCTTTGCTCAAAGACTTTCTCTCTACTCGCATTGCTACCTTGTGGTTTCCCATCCACAATTTTTTTAAAATCTTTTTTT
>Locus_49588_89
AATAAAACACTGGTGCAAGGCCGAAACCTGTTGTTCCGACCACTGTAGTGAACCATATAAAACATTTTCTACCGCTCCCCCCCCCCCCC
>Locus_49587_100
ATGTCACTCAAGTTCGCCTGCTGCCTTGCTGTAGAGTGTATTTAAACTGCTTCATCAGATTACCTTGGGATTACCCAAGAATTACATTCAAAATATTAAA
>Locus_49586_95
CCGCGTGCTCTACGTCATCAGCATCTTGACGTACATCTTGGGCAGCTTGTAGTCCTCCTGGCCGCCAGAGATGGCAGAGGCCTCGAAGATGTCAC
>Locus_49585_148
TATTCTCCTAAGATGTACGAAAGACTTAATTTAGAACACTAACTGAAGTGAAATGTTTCAAAATGAGAGCCAGTTTTAAGACTAAAATTAGTTTTATAGTTGAATCTACGTTTCCAAGCCTTCGCTCTTTTGTCGGTGCTCTTTGTAC
>Locus_49584_95
GGACCTGGGTTGTTCGAGAAGTTGACTTGGAAATTTTTTCAAGTTTAACAAGACCCACAATAGTCTGTTATGAACTTATATTGTGTATATAGTAC
>Locus_49583_200
TGTCCCATTAAGTTCCTTTTACCCAAAGTTGCTCAGGACCCCAGTGGCAAGAATATTGTTATTGAATGTCAGTGCACAGCCAACCCCAAGCCTGTCATAACTTGGTACAAGGGAACATCTGTCCTTGCTGCCAGTACTAGGGTTGTACCCACTATTGTAGAAAATGGATATATTTTTACTTTGAAGCTAGAAATAATAAA
>Locus_49582_104
AAGTCTATAAGACGGATTTCTCATAATCCATTTTTGGTCTAGAAACTGTGGTTGGAATACGAGCGAAAATCAGCATGTGTATCCTGAACTAGGCTGTCGTTGTG
>Locus_49581_81
GAAGGCTAGAATTGGTAGGATCACTTCACTTCTCATGGCATTTGTCATCTGTCATATGAAACACATTTGTGATAGCCCCAA
>Locus_49580_125
AGCAGTCGAAGAGGCTGAGCTTGTCCGGGATCTCAATCGTGAACTCCTCCTCGAGCGCCATCACGACCTCGACGACGTCGAGCGAGTCGAGGCCCAGGTCCGTGGTGAACTTGGCGGCCTCGCTC
>Locus_49579_143
CTAAAAACGAACCCTGTACACATCAAGACGCGCCTCAGTAAGGTCGTAAGACTTCCGACTCCACGTGCTACTCCGTTACGATCGTTTGAGGATTCGGTAACTAAATTATGAAGTGGAACTGGCTCAGTATCTTTCTTGTGCTT
>Locus_49578_117
TAGTGCCTGACGATCCATCCCAATAGGTGTCAATGGTGTCTGTACACACAACCAATTATCAGGTAGACAATGGACATGAGATCAAATCACAAAGGGACTCCTGGTATGTGTATGTTT
>Locus_49577_225
TCGTTAAGTTAATATTTTATGCCATCAGTGAGCATCAAAATGTCAAATGTTTCAAATGTTGAGAATCTGTCCCCTCAAATTATACGCCAAGTGACAAAGGAAATTAGTGGGTTATGTCGTAATCCACCAGAAGGCATTAAAGTTTTTATGAATGATGAAGATGTAACAGATATTCAAGCTACAATTGAAGGACCAGCTGGCACTCCTTATTCGGGCGGAACTTTC
>Locus_49576_82
AATAATAATAAACAACGTATTATGGTAAATAATGTCCAACAGAATTTGTATGTGATATATGCCAGGGACATGTTGATTTGCT
>Locus_49575_77
GTTTAATTTTGGGAAGGTATGTCTCTGAGCTTGCTGTAAACTGTATCAGATATACTGCCACCAACATTATCATAGTA
>Locus_49574_82
GGGCCCTTCTGCTAGACTTATCCAGTTATATATATGTTACAAATATATGAGTATATTACATACTATGTCTACCTAAACTCGT
>Locus_49573_72
CCTTTTGTAACCACAATAATAATGGTAAATATCTTTATAATTTATACAGCCTAAATTTAAAAAGTAAAAAAA
>Locus_49572_79
AACAGATGGGGTTCCCGAGAAAGAAGGAAGAATAAATCACCATTTGTGCCTCTACCAATTTTCCTTAAAAAAACAAAAA
>Locus_49571_249
TATCATAGTATCATCGTTTTACAATGATTATTATTTATCTCGAGGCATTCCTTTTCAAACAGCCCACAACATCTGCTTTTGTTACCAAACGATTCATACCCTAACCCTTGAATGCTTCACAGTCAATAGTTCTCAATAGGCGAGGGCGATCCTTCACAACATGACTTATTTGTAACAAAATAGAGATGAAATGTGTGGACCATCAGGCATAATTAATCACCAGGAGTATTAGCCAGATTTTTAAAAAAA
>Locus_49570_140
ATACTGTATATTGTAACTGTGTTAGAAAAAATTCTTTGCTGCAACTATATAGTTATAGTTTAAAGGTTTTCAACAATGACATGGAGTCAAAGAGGCATAACTCTGTGTAAGTATCTCAGAAAAATCTATATTTAAATATT
>Locus_49569_189
TTCTTTTGTGTACGAGTTATGTGCTGAAATGGAGACAAAGAGTTGCACAACTCCCAAGAGAACTATGTTATGTAAACACATTGTATAAGTCAGGGGCAGGTAGGGGTGCACACAAAGTTAAAGAATGAAGTGGAATTTCGTTACAGAAAACTACAAATGTATAACTTTCTGAGGTGAAGTAAGTTGTGA
>Locus_49568_95
GTGTAAATTTTTGTGTTTCGCCAAAAAATCACATTTAAAAACCCAAAACACTACGAAACACCCCTTAACAACCCAAAGCATCAAAAATTACCTAT
>Locus_49567_156
TGTACCTTTTGTCTTTTACTATGTCAAACACAACCCACCTGGATTAACCTGATAAGTATAGATTTCTGCTGTCAACCATGTTGAGCATTTCTGATGTTATATAAACAAAAAGTTCATTTACACTTTAAAAATCCTAAATGTTCAACAAGCAAAAAT
>Locus_49566_104
TTTATAATCGATTCGTATTTGTTTCCCAAGAAGACATAGCTAGAGGGAAGAATTCTCAACCTGTTAAAGATGCAGTATTTGATATTGCTAGTATAGCCCACCAA
>Locus_49565_162
TAGGTGCACCATATATTTTTCATTTGAGAAATGTTTGTGCCCTAATCAGTTTTAAACAAGGTTACCTAAAGCTGTAATAAACAGATTCACGCAGCAAATATTTAGTTTAAATTTTAAATGAATGTACAATTCAGTGGACATTTCAACATCAAAATAAAAAAA
>Locus_49564_78
AGGAACGTCACTACACCTATAGTAAAGAGCAAGTCTAGTTAGAGAGTATTTGATGTATTCCTTGCAGTGATGTGGATA
>Locus_49563_74
ATTTATTAAATGAAACAGACTCCTGGGAATCATTTGATAGCTAAAGATCTTCTAGTTTAGCAGCACAAATGGAA
>Locus_49562_101
CCACATCTCAACTAGATTGTCCAAATATTTCACACTTTTATTTGTTCACAATTTATATCTACCTTTATTTCCTGGAGGCTGGTTTTTTTTCTGGGGGGGGT
>Locus_49561_179
GTCTCACGTCAACTGTTCAGCAAAAGAAGCAGAAAAATATGTCCTCCATATGATTGAAGATGGTGAGATATTTGCAACTATCAATCAAAAGGATGGCATGGTGCGATTCCATGACAACCCTGAAAATTACAACAGCCCAAATATGTTGCTGGAATTAGACAAAGAGATGCAAAAAAAAA
>Locus_49560_115
ACTGGATGAACACATGCGGTTGACCTACTTGTGTTTGTACTGACCTACATGTGTACGTCCTGGCCTACTTGTGTACGCCGTGACCTACTTGTGTATGCCGTGACATACTTGTGTA
>Locus_49559_91
ACTTTTACCTTTGTAAGTGTCAACAACAATAATTGTTTTAGTTGTCATTTCATGTCATCATTGTTTCTCGTTTTCTCTTCTTCAGATCGGA
>Locus_49558_85
CTAATGTGTGGTGTTAACTATCGGTACCTAGCAGGTGTCACTTCTGCTGGAGGTCTTGTTTGCAAAGGCACCATGCCAAGTATCT
>Locus_49557_113
TTGAGGTAGACATACTTTATTATCTACATTCCAAATTCTAATATTTATACTACTTTTTTAAAAACTTTCCTTTCAACTCATTTATGACTAAAAATTAGACTAGATGTACAGTT
>Locus_49556_241
CTCTATATAGTATCTTTTGTGTCTTCAGTATCTACCATGTGGTTCAGTGTGCTTCAAACAAGCAGGCTACAAATGGCCACCTTGAGAAGCAACAAAATTCCCTTTCTTGTCATTATCAATCAGGTTAATCATTTCATTTACTGGTATTCATATATATGGGTTGTCATTTGTAATTTTAAGTGCATAAAGTAGAGCAGAACACTTCTCATGACGAACTACAAATTTAACTCCATCTTACAAT
>Locus_49555_88
CTTTTCGTGTAGTTGTTTAGACCATTCTCTGCTCTCGTTCAAGGTGGTAAGCCAGGTAGAATCACCAAGAAGAAGAACAAGTCTCAAA
>Locus_49554_100
ACCTAGCTCTAGTAAGTAGATCCCTGAGCAATATACTACAGCCAGTCGTTCGGCTAGTCCAAAATCTTCCGGTCAAGAATAGAAGAAAAATCAATCCCCG
>Locus_49553_82
AACCAGGATTACAGTGACTTATCCAAAGCACAGAGAAACGAATGTTTCAATATTTAGGAGCTCAGTTGGTTTGGAAGTTTAG
>Locus_49552_156
ACGCAGAACTCAATGTCACTCGTACCTGAGATGCTGAGTAGTATGAAACTGTTCGCCTCAAAGTTTCGTGTCAAAGATGACCCGTTATTAATCAGCTGTCTGGAGGAGCAGTTACAAAATGTGACAAGAAACAACTTTATTAATGGCAAGGCAGTG
>Locus_49551_89
GATGCCGAGGAACCACAAGAGATTGTACGTCTTCGAATCAGCCGAGCCGTCCAAATTCAGAGTTTTGGCTAGCACCAGGTTGAACTTCT
>Locus_49550_132
AGTTTCTCGACCTTTCTCTTCTTGAAGGAAAAGTGAAACGTGTGAGTGACCTTGAGGCAGAATGCATGAAACTGAGATCAAAGGCAGCCAGTGGGGAACAAGAGGTCAAGGTGAAGGTTGAAAGATCGGAAG
>Locus_49549_132
TATGGCCCGGCGATAGGATGAAATATCGAGAGTTTTTTGTAGAGCACATGCTTCAGGCCATCACCGACAAGGTTCCTGAGATTAGACAGGCGGCATCCTACGGCATCGGCGTGATTGGTCAGTTTGGAGGGG
>Locus_49548_101
TAGTTTGTGCTACCGTTACAATCACTTGATGAGATCTACAAAATTGCTCGAATCATGCGAGCACGATCATTAGCTAAAACCTTCGATGGAACTGTGAAAGA
>Locus_49547_76
AGATCTTGTACCAAAATATTTAAATAATACTTAAAATTGACAAAAAGGAATGGTTCATGGAAAATTGTAGATCGGA
>Locus_49546_85
ACTTTTGGTATTACTTATCGATTTAACTATCACTGTGTTAGATGCATGCAAATTTTGCCAGATGGACCTAATTTTCTAGAAGTGA
>Locus_49545_74
CGTTTTAAAGTCGAGCAATCCTTATGAGGGTGTGGGTTAAAAATCAATATTAAGTTTTTTCGGCAATCAAGGGC
>Locus_49544_88
AGAAGGCTAGAATTTGGAACTGTTAGTAAATATGGAATGCTTGTAATATAATCATATAAACATCTCTGGTTAGTGAAACAGTTCACCT
>Locus_49543_201
GACTCGAAACCGGAAAATCGACTGCACTTCGGTCTGTTAGCACTGAACTTTGGCCTGTTAGCAGCTTTGATTTTCAATTCAGAGCAATTCCTATCCTATTCAAATTCATTTATATCCTAAGCCATTATTACAGCAATGCATCTACTTGGCTCGCTTACATCGCATTGCCAATCAGGTTTGAATTCACTAATATTTTGTTAA
>Locus_49542_79
TTTTTTCGGTAATTTTTAGTGTGTGGAATATTAAGACACTTGAATAGGAAAATGTACATCAATGCACATACAACTTTTG
>Locus_49541_90
TTGATCCGTTCAGGGATTGAGGTTCTCAAAATACATGTGCCAGATCACATTGGGGTATGACACTTAAGTGTCACAAGTCAAACCTTAAAT
>Locus_49540_134
TAACTTTCGATAATGGTAAACATAGCAACATGGTCCAATTTTCAAAGATCCGGAATCTCTTCGACATTCTTTGACATTGTGTCACTGAGTTTATCAGTCAACGCTGCACCTTTCATTCGTTGATGTCACTGCAA
>Locus_49539_97
CGAGACGGCTAGAAAAAACTCTTACCCAACAACTTCATGTTCCATTGGAGTTGTTCAAAACTGCCAATTAAGCATGGATGCAACAGATAGGAAGAGC
>Locus_49538_129
AGTAGAACCGACTGTTTACTATTTACAACACATCATCTTAGCTAACACATGGATGTACAACACATCATCTTGGCTGATAAATGAATGTCTCAACACACGTGAACAGAAGTTTTACCAAAGTATCAAACA
>Locus_49537_71
ATGATACTATCTCCATTAGTTCATGAGTTCACATCGTTGGTCAAAGAATTGGCTCGACCCGGAGATCTTAC
>Locus_49536_238
GCGGGTGTGGACCTCGTTGGACATCTAATACACACTCAGTGATGGCGTGAAGAATCCATTTAAACACTTCATCAAACACTGGGAGATGCCATGGACCTTCAAATAAAGCATCGAGTTTGTTCAAATCAATGGACAGTGGGTTTTGCTTTGCGAAACACACATATATAATTAACATAAAAATAGAGTGACATCAAAGTCCTTTTAAAAGATTACTCGGGAATAACAACAACAATAATAA
>Locus_49535_171
TTTATTATAATATGTTTATTATCAACCAGCACCTTAAGTGCATCAGCTAAGATTTAACTTAAAAGTAAAAATATAACTTAAATGATCAGTAATATTTGATTTGTATGGACTCTATTAGTGTAACGGTAACTACTACCAGAGTAGATATTGATACAAAATGACAGATCGGAA
>Locus_49534_77
ATTGTACAATCTTAAAGTTCTTTAGAAATTATTTGAGCATGCTACTTTCTTGACTTTTGTTTAAAGTTAAAAATAAA
>Locus_49533_82
AGAAGAACTGGAAAGAAGAATCCACCTTTGGCACCATCATCCGTTGTTTGTCCGGCACTCTTTCCTTGAGCTTGTTGACGTG
>Locus_49532_221
CAATTTTTTTAGTGTGGAAGTTACAGACTCAAAATCTAGCACATTTGTAAAAAATAAGTCTTTAACTTTAAGAGCAGTCACTACAAATGGCATTCAACTTTTTGGGAAAGGGGTGCAATACAGGACAGTTGGTATCATATTTTGGAGTTGTCAGAAGATTGAAAGGGCAGAATATGTGCCTGAGCAAGGGTAATTTTGATCCATAGTTGAGTAACCATATA
>Locus_49531_148
AGTCGTCTATGGTAAATGAATTAGATTCCCTTTGCCTTTGCTTTACTTTTTATCAGACACAATCTTGTGATAGTGTAATTCCTATAGAAGTCGCGTTTTAGCCTCTTGAATTATCCGCGTGTGGTTGAAGACTTGTGTTAAACTGAAC
>Locus_49530_174
ATTATTAACGAATACGTGTATTTCAAATTGCAAAGTTATAAAAAAGGGTAAATGTTCCAAACGACTCACTTCTTTTACACCTTTCAATTGAAAAAACAAGTTATTTGAAACAAAAAATTCCATCTTCACCAAGGTGAGATGTCAATCTCAAACTCACTGTGTCCATATGAGCCA
>Locus_49529_133
ATTCGATCGGTGACTTCTCTTGCAATTTAATTGTGAGTCTACAATTTGATGCTCCGTAGTAATTGTAAAATTTGATAAAATTATTGCATTCAGTTGGACACGTATTCACGTGAGACAAAGATGTACAATGCTG
>Locus_49528_146
TAGAGGACTGAATAAGAAAACTTGTCTTTTTGTTGTACTATTCATCTCTGCGTTTTTTGTTCCTGTTTTCTTTGATTGTTCTCTTTTGTCAGCAGGTGGTGAAATGTCTTTCTGATTGTCAGTGTCTTCACCTTTCACATCATTAG
>Locus_49527_72
CACGACTTGTTGTCATCAGGTCTCAGTGTGTCGGTAGATGACAAAGAGATGCGTGCTGAACAACAGTAGTCC
>Locus_49526_122
GCAGAAGGGAGGAAAGTCAACAGGTTTCGCAAGTCGTAGAATCCATTTGTCGTCATGCGTCTCAACTGGATCCTCATCACCGTTCTGCTCGTGCTGCTGTCCGTGCTTCTGACGACGCACAC
>Locus_49525_82
TCGGTATAAAAATCACTATTTGTCATAATTTCTAATTGAAATATGAGATATCCTTAAACGTTCAGAAATACATATTTATATA
>Locus_49524_76
ATACGTAAGTTACTGTGACATTTATTGATGAAGCTCTATACGTGTACAAAAAGTTCTTATCCTTAGTGTGCCCATG
>Locus_49523_123
AAAAAAAAAAATCCCCCAAACTGACCACAGCAGGGAGCTTAACCGAAGAGAGGCCGCTCATGGGAAACGCTTTAGTAAAGAGATTTTTAGAATCTGGCAAAAATGTGAGAAATGAGGTGTCCA
>Locus_49522_80
ACAGGTTGAAATCGATAATTATATTCAATCTATGTGACCAGGGACAAATAAAATCGGGATTACCCAATTACCCAGATCGG
>Locus_49521_79
ATTTAGACATCAACAAGAATGCTCAAGTGTGTCCAGCTTGAGGGAAGTGAAATTTGTGAATGTGAAAATGTTGGTTGAA
>Locus_49520_79
ATATTTTATTCTAAAATTTATAAAATCTCATTCACTTCAGTACTTGAAAAATTTGCATCAAGGCATGCCAGGTTTGACA
>Locus_49519_77
CCCGCGTCCACTACGGAACCCTTTGATGGACACGACATTGGTGATCTTCGCGCTCTCCCCTGAGCCACTCATATCGG
>Locus_49518_90
AAAAAGTAATTTTTCATTTTTATTCTAATATTTAGAGAATTTTGAGCGTTTGGTTAGTCTTAGCGTTTACATTGAAAATGAGGAAAGTAT
>Locus_49517_102
CATGTTGTACTCTTTGAGTTAATGTCATTTAGAAGTGGATTAGGCTGTGTCCTTCTATGGTCTGGTTAAATACCATATTTGATTTGATTAAATAAAGTGCCC
>Locus_49516_81
GTTAATACTCTACGGTCAGTTTTCAATATAAATATACTGAATATACTGCCCTTCCCTATATCATGATAATGTCTGGGCACA
>Locus_49515_84
TTCTTTTTCGATTCCAGAACGAATCACTTTGTTAGCCTGGATGACAACCGAATTAAAACTATGCCTAGAATAATAACTATTATT
>Locus_49514_119
GTCCCATTATTGTAACGTTAGGTGCTGTACGAGACGATCGTGATTGTCAAACCTGGCGCAGCTAGAAAGACCGCAAACTTGGTGAGAAAGGTGGGAGAGACCATCCTCAACGGAGGAGG
>Locus_49513_107
GATGGTACCTGATTCAGTGGTACAAGTTGGACATATGTCACCTACAAGAGTTCTATACGATCTCTACCTTGGACATAGGTCACCTACAACAGTGGTCCCCAACCTTT
>Locus_49512_112
TACTTAACGAAAACTCTCTTGAAGACCTGCAGTCTGTGGTCGTTCTCGGCTGGAGTTGCATACAATTTGCCATTCGCTTGCTTCCACTGAGCGTAGAGTTGGAAGATTTCCT
>Locus_49511_83
TTGTTCACATTATCATTTACATGATATATGTCAGATTTATATCATATGCGGCAACAAAAAGAAATCACTCAAGTTTTTTTTTT
>Locus_49510_88
ATTGACACAAATCGTTAAAAAACAAACTTCAAGCTCTGCATAAGGATGGTGTAAGTCAACATGTGTTAGTTCGAGCAGATCGGAAGAG
>Locus_49509_96
GTTGTTATGTCACTAACGGTATATCCTAATTCCGTACCAGCGCAGATTCGCAGGTATTGCACAGTCGTTTTTACCAGCTGTGAACTTCGAGGTGAT
>Locus_49508_79
CGTTTAGGTTTACAACTATGTTCTGTTGAAACCAAAGATGAACCTTGGGCTTGGGAAGCTCGTGAATACTTACGGAAAA
>Locus_49507_126
CGCCGGCCCGGACATCACATCTAATGAAATGTGCGCATGATGACAGGCGCCGACTGGCATGTTTGCCTTGTTCTCCAGCACTTAACCTTCTCGGCGACGTAATCTTGGCCGGATAAAAGTCTCGAG
>Locus_49506_103
TTTCCCTCCCCCCCTTTTTACGGGGTTCAACAACCACTTAAAGGAATTACTACTAGGTGTTTATCACTTTTTAAAAAAACAAATGTGGTGATATGAAGACTTT
>Locus_49505_112
GAGATTGTAAGACAGAGTGGGAGTTAAGTTGTGTTGTTTTAGACTCCTGGGAGTGGAAGACGTGCCGATGCGTGTGTTGTTTCCATGACAACTCACTCAACTTACGACTTTA
>Locus_49504_123
ATGTTTTAACATAAAACGGTTCATCATAGATTTTGCTCTAAATTTATAGTACATGTATTGGTAAATGCTTTTAAAATGCCTTATATAAAACATGCATAGAAATGCACTTTGGATTATGTTAGA
>Locus_49503_74
GTACATGACATGACTGTCTACACTGCCTATTTATACGTGATATTGTACCTACAGCATTAATCATAGGTCACCAT
>Locus_49502_92
GGTTGAGACTATTTGGGTGAGATACACACTTGACGTTGCTTTGATAGACTTGTAGCAGATATCACCATTCCACATTTTAAAGCAATCTAGTC
>Locus_49501_115
CAAAGTATTATCATTTGTATCTTATATGATAAAAAACAAACGACAGCACATATTTTTATTTGTACTAGCATGACTAGTGTATTTACAATTTGATAGGATTATAGCAGCTGTTTTC
>Locus_49500_77
GTAGGTGAAGTCACTAGAACTCTCTCGCCACCGATAAACACAATGGCCCTTGAGTGGTGCTTGGGTTCAAACCTCTG
>Locus_49499_159
GAAACCCTTAAAAGATCTCATTGTGCAGCTCTTGGGTTTCCTGACTCTAAGTCCACAGATAGCCTACCTCTGTTTCTGTTAGAACAACATTGTAATCTCCAAGTGTTCTCTGCAAGTCAACACAATAGAGATCTAATGGTCAGTACAGCTCTAATTGCT
>Locus_49498_71
CCTTCACAAGGGGGTAGTGGAATATCATGCACACAAAGCAGTGACTCAAAATAAAGAGATTACCCAGATCG
>Locus_49497_106
AAGACGTAGTTTATGTTTATTTTGCTTCAAGGCCATCGACCTCAGTCAAAGAATTGGAAACACATTTACTGTTGTTCATATATTGTATCTGTATTTCAAACTAGTA
>Locus_49496_96
CGAGAAGGCTAGTTTTAAAAAGAATAAGCTATCATGCAGAGTTTACTGTGCAAACTGACAGGTAGAATATGGTTGGATTTGTTCCACATTCCTATT
>Locus_49495_119
ACGAAAGGGGTACCGGACGTCCTTGTTTGGCCCGCCATATGACGTTGCATCGTCGTTGCGGGGCACAAAGACGATTTGTTGATTCTAGTTTTTGTTATCAGCGTTGAGCCATGGAAGTT
>Locus_49494_73
CACCGTGGGGACACATAAGGTCAGTATGCGCTTTTGCGTTCATATTTTGATACATTCCAATTTTTCATTGTCA
>Locus_49493_112
CCCATTATGTTCAGTCTGGAATCAGCACAACATAATAAGACATTCAGTTGGTTCACATAAGCTAGTCCTTATGAGCTCTAAATATGGTCATAATACTGTTATAACTATGCTT
>Locus_49492_120
TTAGAAAGAAGTCTACGTGTTTATTGGTTTTAATGACTATCTGCCTGAACCTGTAATACTTATAAAAGATTTGAAGCACTCATATTTTGTTCCCCGCATAATTACTTTGTTACAAATCTG
>Locus_49491_84
AGACTTTGTAAATAAAGTGGAGTTGTATTCAAAGGAGCTATAAAAGATGATCAACAGATCTGATACTGATATAATTTTTTTTTT
>Locus_49490_134
CTTACTACAGTACGTCTTGAGGACTGCAATAAGCCATTCAAATAAAATGCAAGATACTCAAACGAATTGTATGATTAAACAATAAAGCAATTTAAATACTTGTGTTTATGTAGTTTTACTGATGAAGGCATTTG
>Locus_49489_154
AAGGTGGTTTTATTTATTCTCAGCAAGTATTTAGCACAGTTTAATAACCTTCACAAAACTTAGCTTAGAAAAGTCCTGAACATTAAATAACCAACTAATTATTGAAAAGTCTATTGCTGAAGATATCATAACAAAGATGGATGTGGATAAGACA
>Locus_49488_89
TGGGACCGACGGTAGAATGTTACGTCAAGGTGCGTTTACAGGAATTTCCACCTGCTTACAATAAAGGGAGCAATTTTGGTATATTGAGA
>Locus_49487_134
GGAATGTTTGAGCAATGATCGTCTTGGGCGATGTTAACGCGAATGGTAGATTTTGGTAAAACGACAAGTCACGTGACATGTTGAAATAGGTCAAGTTGAAGAGCATCTCATCCAGGCAGTGGAGGGCGGCTGGG
>Locus_49486_162
AGTTTCTCTCAGCTCTCATGAGATCAGCATTACGATGAATTGTCTGATAAACTGAATAAACTGGAAATCTCCCATAAGCTCATGTCATCTCAGTTCTCAGAACAGTTTTTACTGGTGATGGTTTTCGCCTATATTTTCGTTTATGATACGGTGAGAGTTTTT
>Locus_49485_96
CCTTTTCTCGAACAACACAACATTGTGGTGAACGGTTGCGCCATCAACTTTCGGTGCGCTGGTATCGTGGACGTTTTCAACGTGCTTGAGTTTGTG
>Locus_49484_105
CACCGGTTCGAATGTAAAAATCAATGTTTACAAAAATAGAATAGAAAGTCACAGCTCCAACTTTCAAGACGAATTCTACGTGAGTCCAGAATTCGACTACCTGAA
>Locus_49483_78
TAGTTTGTGTTGATGGGGGTGCCCTTACAATCACAGCTTGGAAACACTTAAATTCTTGAACAAAAAATATTTAAAAAA
>Locus_49482_128
TAAAACAAATGGTTGTCACAGAGAGCAGTTTAATTATAATTCACATTAAAAACAACCCATAGAAGAGGGTCAACAGCAAAATGTCAGAGGGTAAATGTCAACATTTCAGAAGTATAATATCAAGTAAA
>Locus_49481_128
AATGGTTCTCTAGTTAGTACGCACCGAAGAAAATCTTAATGCTCGTTGGTGATTTTGTTGAAGATTACGAAGTGATGGTTCCCTATCAAGCTCTATTGATGGTGGGTCATCATGTGGATGTTGTATGT
>Locus_49480_87
GAAAAGAGGTCGAGCACTTCGGTATCAAAGCTGCCCGTGAAAAACACATCTTCTCTTCTTGTGGCGATTACGTTCAGAGATCGGAAG
>Locus_49479_86
CTAAGTTAACAACATGCCAACACCATTTTAACAATTGACATCATCAAAGCGATGTGATGTCATGCATTCAGAGAACATTTAAGCTT
>Locus_49478_164
TGTGTAAGACATTGTCATTAGATGTTTACATGTAGAAGATGATGTTTAGATTGTGACTTTGCTCAAAGATCAGCTTGTACCTGCCATGTGCTGTGTGTCCTTGTGTAACTAATAGACTGGTCTCTTAATAAAATTATGCATAAACTCATTAAAAATGTGTGTGT
>Locus_49477_72
TGAACAGGTTGCAATCAGACTTTCAATTTATACTTTTTTAGCAGTCTTTTTTCAAGATGAAGTCCGGTGCAG
>Locus_49476_85
AAAAATTAAGTAATAAGTACGTCTGCTCTATTGTTTATTCCCCAACAAGTTAATCATATTTATGTATGAACGTTAGATCGGAAGA
>Locus_49475_92
TGATACAAGAGAAGACTCTCATTGGTGTGTTCTGATAAACTTGAGTAGTCCTTGGGAGATGACAGACTCTGGTCAGCAGATGACACGTTGTC
>Locus_49474_78
ACCTACATACGATGTTAATGAATGGTGTACTAGGTCTTCATCGTATGAATTGGGTATATGCATTGTTTGTATGCTATG
>Locus_49473_76
ACGAAGGAGTTGCTTTTTATTTACAAGAGGAAAAATTCTCTGTTTATTTAGTCACCTGTGATAAGTTGAAAAACAA
>Locus_49472_113
ATTTTTATTTTTTGTGAGTATACTTGAAATGAGTGAAGCTACTGTGAAGTCAAGTCATGGTAATCAAGACCTAACCGAATACTGAGAAATTGTTTCTACTATTACCCTGTTAT
>Locus_49471_113
GTCGGCCAGGTCACGATAGTAAAATAAACTTCTCAAGTCTGGCTCACTACAAACAAACATAATTCAGGATTGTATTTTCACCTAAAGTACATTTTTTTTCAAAAGAGATTTAT
>Locus_49470_213
TATTGTACATGTGTAATTAATACATCTGAACTGTGTACATCAAAATATATCTTAATGTGATGCTTCAGATAACACTGTCAAATTAGATAGTGCCAACAGCACAAAAGAGGAAAATGAAATAGAAAATAAACATAAGTTTACAGATGATACAACAAAGTTAGTGTAATTCTGCTAATTAATATTATTGATATTATTATTATTTTTGTATTGTCA
>Locus_49469_95
TGTATTTCTAGTGGTACATTTTAGTTTCTCTATGTTTAAAGTCTGTCTTCATCTAACACTGTCAACACAAGGAACTCAAGATGAATGTGTCACAA
>Locus_49468_105
TGATCTAGATTTTTTTATAAAAGTAATACCTATATGATCTATATGTTACAGTTTTAACTATTTATTTTAAAGGGAAAATTCTTAGACATCATTGGGATGGATCAG
>Locus_49467_177
TAGAACAGTTGTTAGAAAGTGTGCTTTAACCTAGCAGTCTTACCATACTTCTGGTGAGGCTAGTGATGAACTCCTTGTATTGGTTCAAGGTTACTTAAGTCATTACTTGGCCTCAAATTTTTTTACCCCAATACTTGGTGCAATTTCCAGGAGAAATGTATACATGTATTTTAATCT
>Locus_49466_133
GAACTGATGTTTATAATCTGTTCAACTCTAAATTTGGTCAGTTGTATCAGATATATCAACAAACATTTGCTGAATTTTAAGATGAAATAGACATAAACTTTATTAACATATCAACGAAGAGATCTGACTTTGA
>Locus_49465_79
GGTCGTAGACGGAAAAGACATGTACTTCACGAAGATGTTCTCCCTCATCATCACGGCGTTCTCTGGCTCTATGCATCCG
>Locus_49464_89
CCCATTATTCAATAAGCGTAGGGACAACAAATATGGCGACGCTCATTCTGGACAATGGAGCTGGTTCAGCAAAAGTCGGGTTTTTTTTT
>Locus_49463_83
CTCCTCGTGAACTAATAACGATGATTTTTGATGTAAGTAAACGGCTAGTGGTGGAATGAAAATGGCAAGAATAGATCGGAAGA
>Locus_49462_84
CAGTCGATTTCTCACAGACCGGCCATACTTAAAAGTGATGTTCTCTTTTTAATACAGTTACATTTTATATATGCACGACTGTTC
>Locus_49461_131
AGGGTAGGGTACACCACGTTGGGTCCCATATTTTTGGAATAGTATATCCTCCAGACTGCCGGGGTGTCTGTACAGGAGACCAGGGTGGTGACAGACAGGTCATACATATGGTCGTGTCCATAGAATTGTCG
>Locus_49460_171
AAAGTTACTTTTACGAGTGTTTGTAGCTATAAGACAAAGTGGAAATGTATATTCATATGACGCTGTTGAACGTCTCAACATTAAACCTTCTCATTGGAAAGATCTGCTTACGGATGAACCTTTTACGCGTAAAGATATTATCACAATTCAGGATCCAACAAATCTGGACAA
>Locus_49459_85
AGTTCTAATAGAAGCTTTGTGAATCAGAGATCTTAGCACTGGAAGTATGAGTGCCTACACATGGGACAAGGGGGGCAACTATGGC
>Locus_49458_161
TTAAAATAATTGGCAAGTACTTCAAACACTAATGCATAATGGAAAAATTTGTGATATTACCTAATGTCCCTCACTGCCTTTAATTGGAATACTTTTATATGATATTTTCCAACTAATTATATCTTTCCTCAGTAGTTGTGACATTATGTTTAAAAAAAAAT
>Locus_49457_75
ACCTCGTGCGGGCGGGCGGTTTCTTACCCGCCTTCCTCCCCAATCAGTTTGGCGTGGTCAAGTACCCGCCGCCCC
>Locus_49456_115
CTACATGGGTTCCCGGTCATTCTCACATGTTTACACAACTGTGAACCAGTTAAAAAACATTCTCAAAATATTATTGAAATACCTCAGCATTATTTCCCTTGACAAGTTAAATTGG
>Locus_49455_85
GAGAAGGCTAGAATATTAGTAAACTCGGCTAAGAAGAAAATAATGACATGTAAGTCGAATGGGCGGCATCGGAGATCGGACGAGC
>Locus_49454_168
AAAAAAAATTTTTACAATGGAAACAAAACTGTGCCTTACAAGAGTTTCAAGACTCAATCTTTTTAAGTTACACGAGATGAGACCCTGTCATGACCAACTTTCATTTCATTGTTCCATCATTATGTTAAAACTGATGTTTATTGGTACGGTACTATCAAAGGTTGACTG
>Locus_49453_163
TGATCTGTTCTACTAACGTCCACAAGACAACGTTAGACGATAGACAAGATGATTGAAGTACACCTCACGTCAGACACTACACAAGATGATTGCAGTACACCTCAANNNNNNNNNNCGTTAGACACTAGGCAAGATGATTGCAGTATAACACAACGTTAGACAC
>Locus_49452_196
GAACAGACACCGTGGGTCTGACTATGCGATGCAAGATGACCCTATGGATGAACTCATGTTTCAATGCAAGATGCTTGATGTAGATGGAGACGGGAAGATTAAAAAAGGTGAGATGTAAAAATTTATCAAAGAGTTTGACCAGCCACTAAGCGGACATGAACTGACTGACATTCTAACTCGTGGACCTCAACCAGAC
>Locus_49451_97
CTTGTACAACTACTTCCGAAGCTTGGCTGAACCACAATTTTGCAGACCTGTTGATAGACCTAAAGCACAATCAGTTTTTGATGATTTTTTGCACATA
>Locus_49450_96
AGTCTTTTACTTAAAATAACTTCATGAAAGTTTATAATAAACTCATTTGTTGTAAATGGCAACAACATATTTTTTAAAAGAATACAATGTATACAT
>Locus_49449_163
ACAAATTCAAACATAAAATTCTATAAAAATGACCAGGCCAAGTGTTCTTCCTGTACCCCATGCATCATCACTCAATGTCCTAGACATAATTATTTACATTTCTGAACACTTGAATCTGACTCGTCAACATTTTAGCAGAATTTTTTACATGGTATTTTACATT
>Locus_49448_110
AAAAAAATAGGGAAATTTATCAATGAGCAGATGAGATGAGCAGTGGAAATATCTGCTTTACAGGTAACATGAAAGAGATGGAATGCCGATCAACACAGAAAAAAGAAAAT
>Locus_49447_136
CCGAAGAAGTTCAAGTCTGGTAGTCCGTCTTTGGACGAGCGGGGTCTTGTATAATTATTATGCAGGCTAGAACACCACCTGCTTCAGCCGTATTCAACCCTTAAGGTTGCCCGTATTTATGTTTGTTGTCTTGCTG
>Locus_49446_174
CCGCTTATGAACAACATCAGATCCTTTGTATAATCCTGTAGAAATGAACGGAATCGATGGAGTAAAACATGCGGTTATTCGTCGAGTGAAATTCGAACTTGGCTATGAGGTTAATTTTGATCTGATGTATCTGACAAGAATCTTTTATCAAGCACGCAACATTCCTGATGATGG
>Locus_49445_103
GTAGTACGGTTGAAGTTGAAAGGCTAACCCAAAAACTGGTCAGCATAAAGAAATCAACATTTTCTGAACCATGCCCGGTGATTATTCCACATGTGTGGGGAAA
>Locus_49444_77
CCACGTCCGAATCGACAAAACGGTGCAGGCTGAGCGGTCTGTTGTGGAGGAGCCTGAGGAGTCACAGGCTTCGGCGG
>Locus_49443_94
TTGACGGTACTAATCGACTGGCCGACTTTGAATCTGATCAAATTAAGTGTATCTATCGGCACTTTTCAATTTTTAAAATAGGAAAATAAACATT
>Locus_49442_109
CGACCTGTAAGGAGTGTCATGTAAGGCGAGTGGGAGGGGGTAGTGTCGCAATGAGTAGATTGATGAAAATGTATGGATTGTTTTGTCATGGAGGGGGAGGGAGTTTCCA
>Locus_49441_145
GTAGAGATCGTAAGTACATGATGACACTAGTCTTGATTTTTCAGCATTCCAAACAAAAACAAAAGAGGTAATGGTTTTGTCTCACAACTTGTTTATTACTGTCATTTAACTTAAACTGTGACTTTAATTTTGTTTTGTTTAAAAA
>Locus_49440_85
GAAGTTTGGTAGGTCGTTAGCAGCAGTGAGATCAAAGACATCTTGTCCATCCTCAAGCCGCTGCTATCAGACAAAAGACTAGAAA
>Locus_49439_104
GACAGGGGTTAGGAACATCAACTCTTTCAAGCCTCTCAAAACCAAGGTAAATTGTCCCAGTATTGGAAGTTAGTTAGCTAATGTAATTCCCTTCTTTAAAAAAA
>Locus_49438_96
GCGGGGGGGAAAAGGGGGTGAATAATTTTAGTAAGAGCAGAATGCTGATCCAAGCAATCTTATTTCTCTTACATAAAACATTGAAGGAAAAAAAAA
>Locus_49437_74
GAAGGCTAGAGAGTATAAATAATCCACATTCGTAGCAGCTGGATCACAGACTTTATCAACATTTGAGATCGGAA
>Locus_49436_95
GCAAAAAACAACAACCATAGTGAGGCTGAATGTCTGCTCTAAGCAACCATTAATAAGCGTATCTTGTAGGGTGAAAACGTACCAGTGGCGGGGGG
>Locus_49435_72
AAGTTTACATTCACCGACTGAGATTCTTCACTTCTTACCAACCATCTTCACGGCTTGTCTACGGTTTAGGTC
>Locus_49434_85
ATCAATTGGAAATTGGATACTATTACTCTTTGTATTTCACATTGAATATATTTCTTTTATTGTTCATTATTATTGTATTAGTTAA
>Locus_49433_124
AAGAAAAATACAATTAAAATTTGCACCAGTGAGACTCTCCCACCCTATCAGACGACCGTCTGGACTTCACTTAACCTCTGATGGCCATTTGTATGTCATTAACTATTTGGACAATGAAATAGCA
>Locus_49432_129
CGAGTAGGCTAGATCGTCCTGTTGCAAAGAAGAAGGGTGAAAAGTACACCCCAGCTGTTGCCATCAAACGTCAACCAATTGGACCCCGTTCTTCTTACATTCTCGCACTCAAGAATACCCCAGTGAGAC
>Locus_49431_105
TGTCGAAATATTGTCGTGATCACCAAGAGTTCTCCGACTTGTCTGCCAGACTAGGTCAAGATGGAGATGCTACAGCGGAAGATGATGGGGACGATATTCTCCCCC
>Locus_49430_145
AATGACGGAGTAAACTTTACTAGTTGTCATCTACCTAATCATTACCCAAATCTCGTGGTACACAGTATTTTCATAGATTGTGATGTATTAGAGTTTGTCTGAAGATTGGATTTTTAACAATCCTCCACAGAAAGGGACATTTTTA
>Locus_49429_300
CAAACACACTGCTTCGACAACCAAATATGGTCACGTTGGGAATGGTGTTGGCGAGTTGAACTATAGCTTGGCCCACTCCGCCTCCTAGTGAATGCGCCAGAATGGACTGCCCGTCCCTGACCCCAGCCAAGTCGAAGAGGATGATGTAGGCAGCGACATAGTTCATCAGCAGGGCAGCAGCGTCGTGGAAGCTCAGGTTGTCGCCGATTTTGTAGACGTAATTGCTGGACACGGCCACCAGCTCCGACCAGGCTTTGTAGTCTGAGAAGGACATGACTCGGTCGCCAACTGCGATGTCTG
>Locus_49428_233
CAGAGTAACACAATGTGTTCGTTTAATGGCGTCATATCCACTTAACCTCTACTCCAATAGGAAGAGTTTTTAGTTTTATTGTGGGTCAAATGACATGCCCACGTATTAGGTGCTTTAAAGAACAAACAATGTTTCGAAGCAAATTGTGAGCTCAATATTAAATAGTAATGCAATTTTGATTTTTATTCGTTTCAAAATTGGTCTTTGAAAATAGAATATTCATTAATTGGTTA
>Locus_49427_162
TAATGTAGTCGACTACATTATCATTCATGAACTATTCCTTCTTTAGGGATCAAGGCAGATGCTATTCCCGGACGCCTGAATTCTTTAATTAGAATTAGTCCATTTTCTGGTCTTTATTATGGTCAGTGTAGGGAGATTTGTGGGTCAAATCACAGATATATG
>Locus_49426_287
AACTTCATACAATCGTCTACACGGTTTGGTTTCGTTTGGTCTACTCTTGAAGTTGAAGGGTAATTTTACAGTCATTTCCGGATTACGAATGCGCAAATAAACTGTTGGTATTTTCCGAATAACTCAATGTCATTTTATTATCCTTAGTACATTACATTTAAAGTTAAAGATGTCTCTTGTTATTAGTCCCACGTGAATAACTGCAGAAAGTAATTATACAGAGCACGCTTATATACAGTTACCGTCTAGCTCCTGTCTACTGGTTCATGGTTCAATTTTAAGTTAAG
>Locus_49425_368
TTTTTTTTTTGGCTCGAGTACAGTGTTCACCTCTGTACACGATTACGAATAGTTCTTAGACCCAATAGATGTCTGGCCAAACACTGTAAGTTCAGCTTTCTTATCTTTTGAAATTGGAATTTGTTATGGTTTTAAGCATTGACAAAACAGATGTGTGTCTTTCAATCGGACTTAAGGCATGAATCATACGATTCAAGTTTTCTTGTGAACGGAAGGGGAGGGTGTAGGACTTGGTTCGAAGATACGGTAGCCTAGCAACAGGATTGGATCTTTGAAACGTTTAGTCACAACCTTGAATGAACAAATGTTTTATGTTATTATTTGGAACGTGTGTATCAAGAATTTTATTTTTTATGATTATTTGGTAC
>Locus_49424_92
AATAATTAGAAAAAGAAAATAATTACATGGATATAATTTACTTCCGTTTGACGGCCAGGTCAGCTTTGGAAACTGCCTGATGCTTTTAGGAA
>Locus_49423_85
CGAGAGGGCTAGAACTGGTAGTCTCCGTCCCTTCACAAGTTGCAGTTAACGTCTACACGGCCTTGTTATATCTAGATCGGAAGAG
>Locus_49422_138
CACTCGTAAAACGGTTCACCCTTCGATATGACAGAGGTGAAAGTCAACAGGTTGAAAATGTATTCAGAGTTATAGCAGCAGTTTCCTCAGTACTAACTCTAAATCCTGCAGTTTACATTCATTGGTTCATCCTGAGAC
>Locus_49421_85
AAGTAAACAGGGTAGTGTGTAGCACCTTGCACAGTCAGACATCGGGCTTCAGCTCTCCCGTATCACGTATCATATCGTGGTGTTT
>Locus_49420_93
CTGGGTGGGTTGTAATTTTTTTGATAATATAACTTTATTACAAGCAAAATTCTTCTTCTAACTTGACTTCCCATGAGTTAATTCTATTAAATG
>Locus_49419_156
CCCAGAAATAGAGAATCAAACAATCAGAGAAATTCTTAGATATTCATAATTACTTTATTAATTACTTGCATAAAATAATAAATGACAACTGCTTGACTCGCTTATCTCTGTTTGATTTTTATTATNNNNNNNNNNTTTGTAAATGTGTCTTTTTTT
>Locus_49418_76
TTTTTTTAGGGTTACTTTAGAAAACGAAAGTCGAAGAACTACGAAAACAATTCGAAGCTTGTCATGATATGATCTC
>Locus_49417_75
TGTACTCAATTCTGTCACAAAGTTCATATCTTACATTACATGACAAATGGATATGATTATAATAATTAAACACTT
>Locus_49416_152
ACCTCTAATAAGTTTTGACTTCAGAACAACCATTAGTTACATCATTAAACCTTGAAACACCAGAGGATAGAAGAACAAAGACGTTTCAGGTACATAAGGCAATTAATCATAACTTGGAAATACAATACATGTACAAAGATAACCTAATACAA
>Locus_49415_98
TTTAGAATAAATTTATTTCATTGATTTTTTATTTAAATATTTCGTTCTCAAGTTGAAGCCAATATAAAAATTGAAGGGATACAAGATAGATCGGAAGA
>Locus_49414_86
CTGTTGATCTCCGCAGCAGAATGTAAACAACTGTAGTGTTAGAACTAACGGTGATGTTTATGCAAATAATGTCATTGTGACAACTA
>Locus_49413_74
AGTTGAAAGTATACGGTGGTAGTTGGGTGTACTCTGCTGGACCTTCCTTATTTTCTTTACGCAGATTATTTTTC
>Locus_49412_71
ATCTAAAACAGATTTTCAGGTCAGCTGTAGAACGAGTATATTATACGTTATATGGAGAGCCCATTATGTTG
>Locus_49411_126
GGTACAGGCTTAAGGTCTGCGGAATAATCAACATGCCCTCCTAGACTAGACGACGGTCATCTCATTATGCAGGTCAACGCCGTAGCACAAGTGGCCTTACTGTGTACAGACGATACATATCAATTG
>Locus_49410_118
TTTGTAAAGTTCCTACAGTGATCATATGACATCTTGCAGCATGCACAAAAGTTGCAGACATTAATTCGTGTATGTTACAAAACTTAAGGGCGATGTATCACCAACAAATGATTGAAGA
>Locus_49409_168
AGGGGCAGACAGACGCAGACCTGGTATTCATCCCTCAAGTCCTTCTTCTGGTTGTGGTAGCAGCTGCCTTTCACAGAGACCAACCCCTGGCCTGGTTCCTGTCTACGTTTGTCTTTGTCATGGCAAATAAAGTTTGCACCTCACAGTATTTCCTGTGGTACCTGAGTC
>Locus_49408_135
GGTTTCCAATTTTTCAAACTGAACCTCTAGATATTATAAAGTTATTCTGAATCTTTCAACTTTGTGTCTTAATGATCACTACTAGTTATATAAATGCACTTTTCCCTTCATCCCATTAGAGGGAATGCATCACAG
>Locus_49407_147
ATGCCGGAGACATGCACGCGAGACTCAGTATTCGTTTAATGGCTCCAATTGTGAAACGTGCCTCTCCAAGATTTCGATATTTTTCACTCTCGTAGTCAATATCTGCCATAATCCCCCATGTGACTGACAGGAAGGAGAAAATATTTT
>Locus_49406_141
CCAAATAAATATCAAACTTAATAATTTTCATTCAATCTGACGAGATTTTATTTTTTTAAAAGCACAAAAAAACTTATTTTAGTTCTTACTGATATTCACTACTATTATTATTAGCGATTATCGTCGTTTCGAAGTTTAATA
>Locus_49405_82
AAATCACCGTGCAATGGGCAATCCTTCCAGAGTATGGTCGCCTTCGGGTGGGTGGTGGCCTCTTCCTCGCCAGTGGCAGCGC
>Locus_49404_125
AAAACCAAAAAACAAAGGATCTTATTTGTTTGTGTGTTTATGAAGCTAATGGCACTAGCTGTGACGTGACAAGACTGATGGAACATTACGGTGAAACACCCACATGTTTGTGGGCAAAGTCAAAA
>Locus_49403_140
GATTAAATAGGGAAAGAAGTAACTCTATTGTTGAACATTGCCAAATATAAGATTTGAAATAAATGTAACTTCTTTTATATAATTGTTAATGGAATTTAAAAACAACATGGGTGTGTTACACTTATGCATCACCATTCTTT
>Locus_49402_149
TTAGCTACAATACAATTAATTTATACTTGCTTTTAACAGAATATTTGATATTTTTCATCAAGTAATTAATCTAAATGTTTCAATATACTATTTGGTTCAAAGAAAATAATATAATTTGCAAAGTATTAAGGAGCTTTTTCTGAAACTAT
>Locus_49401_125
CACTTATCGTTCTAATACGACTGGCTGCCATCTATTCATCAACTTGTGTATAACATATGAGTTAAATACAAGATGTTGTTGCTAACATAATGCTGCAAGAAACACTTATCTGATGAGAACTACCT
>Locus_49400_102
ATTTTTTTTTATATTTTTATCTGCATCCAGTTTTCTCAGTTCAGTAAAATTAAATGAGGAAAAAATTAATTAATTCTTTGATGAAACAAAACACAATATTGT
>Locus_49399_81
TTTACCTTTATTTTTTATACCTAACCCAATGTTTATTAATGGTAACAATGCCTTTCAAAATACAAGTTGTAAGATCGGAAG
>Locus_49398_101
AAGGTTACATTTGGTCTTTTAGGCACTTTTAGTTTCAGTTGTGTTTTTAATAACTGATCAAGTACTAGATAAGATTTTATTTGGGGTAGGAAAAGGGGCAC
>Locus_49397_83
AAAAAAATAGTGTTCACTGATATGTCACATCAAGCTGTCCCATTATCAGATACCAAACATATTTAACACATTACAAAAAAAAA
>Locus_49396_115
AGAACGGCAGATAACCGACCGGGAAAGTCTGTAGATTTCAACTGTTGCTCACACCATTCAGTCAATAATTTCATTTATCAGGTCATTAATTTTTATGTTTTCTCATTGCTTCTTA
>Locus_49395_131
TCATACGAGCACAACTTATGCAATGATAACAATCAGAATTGGCAAGTCGTTCCTAGGAGAAGACCCCCAGATAAAGGATTTCTTAAACAAGATAAAGAAGTCCGAAAAGTGACAACAGTCACTAAAAAGAA
>Locus_49394_78
CGAAAAACCAAACAAAAAAACCTTGTGGAGGGGGGTGGGGTAGGGAGAGATGTCTGAAGGGGATGGGTAGAGTTAATC
>Locus_49393_113
CTGAGGTAGATGAATAAAGGCCTGTCACATTAAAACATGGACATTGGTATGAAAGTTACTGTTGGGTTAATTAAAAAGAAACAGAAAGAAATAGGAGCAGCTGAGGACAAGTG
>Locus_49392_97
AAATAGAGATTATGTAGTGGGATCAGAACCACTAACAAAGAGATATATCTCACACATTCAAAATGAGTCGTCATCCAATGATATCTACTCACCCATC
>Locus_49391_96
GCACTTCTACAAGACTATAATATTTGAAGATGTTAGTATGCCCTTCGTCTGTTAACAGGAGTCGTGGTTCGACATCGAACAGGGGTTTTAGGCTTC
>Locus_49390_279
GACTGAAGTATCAGGACATATCTTTTTGATGGAGACATGCTGGGGTCTTGACTGTTGGCCATTTGTAAACTGTACTGTTTAAGGTCACTGGTGCATTACTGTATGAATAGTTACAAATATGATAAGACGATAGCCTTCGTCTAAGATGACCGAACTTTAAGAATATTTTTAGGGGTTAAAAATTCGTCTTATACGCCGTAATATACGGTACTTTTATGAAACATGTGTTACAATAGGGAAATCTTAATGTTTAACAAGCACTTACAATTTAAATCCGAC
>Locus_49389_74
AAACCTTGGTACCTCGTACAGCCCTTCAGTCCCGATTTTCGCAATTAGTCCACACTAGAGGCCGCTGGTTGCCC
>Locus_49388_88
GAGAAGGCTAGACAAACTCAAAGTAACACTTGCTCAGAAATATTAGTGGAAATTAGTCAATATATTATTATTTATTTGCGAGATCGGA
>Locus_49387_91
AAATCTGTACAGTCCCATATATATCTTATCTGTATGCAGAAATCCTAAGACGAGGAGATTTTAAAAATACTACTAATACTACAGACCTGGT
>Locus_49386_102
TGTAAAAGAGTCGTTTAGAGCTTACAAATGGTTTTCACCATAAATTTACCAAGGTATCTGAACCTTAACAAGCAATATTAGCAGTATTACAGTCAGCAGAAA
>Locus_49385_85
AGGGAACTCGAGAAGTATACTTAAAGATGATATGAGTTACAGTATTAACAAATATTTAAATATGTAAAATTTATTAATAAAAACA
>Locus_49384_160
TTTTTTCGTACCGGTTATTTACATTTGTTCCTTTTCTAAAAACCATTGGTGGTGTTGCCAAAGCCTGTAAAGTCAAAGTTCACGTCACTGATTCGTACAAACAATTGAAAACTCCCACTGAATTCGTTCTTTCATCTCAAATGCCTTTAGCTCTTGGTCG
>Locus_49383_81
ATTATTCTTTAACCTTTTATTTAATATACATATGAATCATTTTATCAGAGCAAAGGCGACCAATTATAAAAAAACCTGCTA
>Locus_49382_123
AAAAAAAAAAAAATTCACGGCTCTTCAAAACATTCCCAAGTCAATATTTTCTGCATCATTCCCCAGTGATCCTCAAATCTTATTGCAGCAGGAGACTTTTTAATCCACTGTGGATACTCACAC
>Locus_49381_110
ACCTGTAGTCGGACTCTAATGAGCAGATCAATTATAAGACTTATAGTTTCACATGACATGTAAAATATAAAAAATCCACTCTGCTTTCTTTTCAAAATAGAAATCATACA
>Locus_49380_73
CAAACGGGTCCATCAAGCTGGGGCGGAGGGACGCACGTTTGCCAGCCGAGGGTCGCAGCGAAGCGCGTCGGCC
>Locus_49379_74
GTCCGGTTCAGTTTTCCTTTGCAACTTGGAAGAGTGCCATCAGCAGGATTACTTAGTACCTTGAGCTCAACTTA
>Locus_49378_124
AAGGCTAGAATTTTTCTCTTATGTTTCAGTCATTGTTTCCAATCTCTTAGGACTCGAATATTTAACATAAATTGGAGTGCTTTTATGTCGGCGCTATTTTGTCGTGTGCTCTTTTGACTTCTAG
>Locus_49377_74
CCGTTAGTAACAAAAATAAATATATCAACAGCTAAGGAATAATTCTTTGAGTGCAATTTGATGCTTATGTTAAA
>Locus_49376_134
TATCTATCGTCTTGACAGATTGTTGAAGACCTGCCACCCCATGCAAATCATACTTGGGTTAAAAATATTTTTTCTAAATGCGGCTCCGTAGTTTATATCAGTTTACCTGTGTACAAAACAAATAAGCAGATTAA
>Locus_49375_82
GAAGGCTAGAGTATGTGAAAATCATTGAAATAATCTATTCTTCTATTTCTTCTCATGTTAATATCTATTAATTGGGTTGCAT
>Locus_49374_75
AATAACTTTCCCGTTTATAGGCCAAGTGGGTGAATGCGATTAAAACACTAAGATGTTATTGAAAGGGCAAATATC
>Locus_49373_120
GAGGTGGACCGATTCTACAACATCCTACATAAAGGGTTAAGATTATTAAAAATATTGTCTCCTAATGAATTTGTAACAAACTAAAAAGACATCAGTTATGAGTGGTGCAGACTGTGATAA
>Locus_49372_80
CGCCCACGAAGGAGTCGGCCTTCGGGCTTCGCCGGCTGATCGAGACCGAACGTGCGCTTGAGGAACTCGGCGCCAGCTGC
>Locus_49371_129
GCGTCGGGATTTAATATACGATTGAAATGTGCTCTTAGGATCATGCCGTGTCATCAATCAAGCGTTGCATATGTTTTGTTTTTCAACACAGGTGTATCTTCTATGTCCCTTAGATCATTGCTTCTCAAA
>Locus_49370_86
GATCATGGAGAAGAAACAATTAAGCTTATAAACATTCAACTTTAGGATACAGAGATGTGAGAAGGCAGTTCTGGTGGGGTTAGAAA
>Locus_49369_81
ATTAAACAAAACAAACCGGAACAGACAACATTCATAATCATCACCACCTTAAAAATAGACAAATTGAAGAAATAATTTATA
>Locus_49368_81
AAACATTTCAGTGTAACTTCAGTCATTATGATCAATATTCAGGTTAACTTGTACAAATATCTTTGTAAAGTCACATTGAAG
>Locus_49367_109
CTTTAACAGTAGAAACAGAGCTTCCACTTGTCCTATCTCTTGTGTCTGGAACAGCTTGGAGTTTAAACACATGACACTTAAACCAACCATCAATTGTCTTGTACACATG
>Locus_49366_111
TTAAGTGTATCTCTTATGTTTAAAAATGTCCCTGCTATCCACTTAGTTCAGCGCTGGCACAGTAAAACATAAGGTTATCTAATGTTGCTATCAATAATTTCATGTTGCAGA
>Locus_49365_88
GCAGACGAAACTGATTTTTTTTAGACACAAAACACAAAGAATGAGAATGGATGTCTAAAAAGTCCTTGAGATGGTCTCCTGTCAATGA
>Locus_49364_99
CCAAGCACATTACCAAATAAATTCGTGAACTGGTATTGGTGAGATTGTATGGTTGAGGTGGAATTGATGAGATGGTATTGGTGAGATNNNNNNNNNNGG
>Locus_49363_92
CCTACGACATGTTGAAACGTTACAGGTTTCTTTTATTTTGCTCACACACCAATGGGCCTTAGAGGGAATTTGATTGAAGGAATGAATGATTA
>Locus_49362_72
CAGAATAATTGACTCAAGTTGGGTCGTTCAGCGTCCAAGGTTCAGGAATCATACAGACATGATTAGCTGCTA
>Locus_49361_146
AACATTCTTTTTCTCGATAATGAAATACCAAGGCTTAGACGGCACCTCAAGGCCGCAGAGATTGATCTGGAAGAAGCCAAAGACTGGTCCGTACTTGATGTTTTTCAAATTCAAAGCTGAATCGGGCTTCATAGAATCTCTCCCCT
>Locus_49360_95
TACTCAAACAACCGGATCTATCACACATTTTAGTTTGAACAAAACTAACCAAGTGTGGCTGCCGTGTGTCTGTGAAGCTGTTTGCTTCTGTAACT
>Locus_49359_98
ACAAGTTTTAACCCGTTACCGATGTAAGACAATAACGAACTTGACAGTTAACTTCAGGATTGGACAAAGGGATGTAGTACAATCTTGAACTTGACAGT
>Locus_49358_132
TTACATACCGGGCTCCCCTAGCGTTTATCTAAACACGGTACGCAGCGTGCGGGTAAATGAATACTTTGCCAGGTGGACGAATAAAGTTATATGTTGCACAGATCACGGGCATGCTTGTTCAATTGGCAATAG
>Locus_49357_135
AAAAGTAAAACGGGGTAAATTCTGATTCATGTTGATGTCCTAATCGCTGTAATTCTTGCCCGCCACACTGAAATTGCGTAATTTCATGCAGCATATCATTCCCAGCTGGGGACAATAAAAAATCTGAGAAATCTT
>Locus_49356_108
TAGTCAACTTTGGACATAGTGAGTGTGGTGTAACCAACTGGTCATTTCTCTCTATACCACCTTAGCTTGCTATATTCAAGGGTTCTAAATCAGTTGAAACCTGTATCA
>Locus_49355_95
ACAGTTGTGAATATTGTGTATACATCAGTGTTTCTCATCTCATCTTACATGAATGCAGGTTGATAAATACAGAGTTGTCAACACTTATAACACAT
>Locus_49354_116
GCCACCATTGCCTTAACACCACGAGTATCATATCATCCGCCACATGACCAATCTAGAAAGCGTTAACACATACGAGGGTACCAACGACATCCACGCCTTGATTTTGGGAAGAGCCA
>Locus_49353_170
CCCATTATGTCAGTTGTTTGAAACAACATAGCAGACAAATCTAAATTATTAGCTGACATTGGAAAGGATCACGCATTGAAACACGTTGAAACCACTGACAAGAGTGTCCCAGTCATTGAAAACGTTCAAATCAAGACCAACGACCGTGGAGCTTTCCTTGCTGAAGTTGC
>Locus_49352_72
AAAGTTTAAATTTAAATTGTCTGACCCCTTTTCAAAATTCAGGTTGTTGAAACACTGCAATATTGCAACAGA
>Locus_49351_135
AGAGAACAACACCAACTCCTCGGTGAAGTAGTTCTGGAGGAAGACACTTCTTCTGAAGTTAAGTTCTTGAGGGGTGGCATAAACCTTGGAGTGGGTCTTGATCCAAGTCTGGAAGGCCTCCTCAACGTATCCGGG
>Locus_49350_135
CGAAAAAATTTACTTTGTCTAGAAATGGAAGGAAAGACTCTGGATTGCAGAAAGTAACAAAGATGTGATAGAAACCATCACAAAATACAAGAGTTCTATCACATGGCAAGCTTGAGACGCAAGCCTGGAGCATAG
>Locus_49349_135
TACTTGTGAGTTCGGCGAGGCATCTCATTGTGACATTGACTGTCAACACTAAAGCACCAAGTTTCTTTGCAAAGTCCGTGAACACTGATTCTGAAGGTGCCCCTGGAAGTCTAGCTAGAAAAAGCAAATCTCCAT
>Locus_49348_101
AAACACCTACCTCGTCAGGAGTGCACACAATACCAATACCTGACTTCAACTGACAGGCGATCATTTCCATCCAGGATTTTAGAAACGGGAACAGAATCTTT
>Locus_49347_98
CGATCAACACACGCACGCATTGTGCGCGGGGTGGATAAAATAAAAAAAACCCATAAATAAATAGAAAATATACATGAGAGATAGATAGAGAGAGAGAG
>Locus_49346_174
TAAGTTCGGTGTGAATAGATTTAGTCAAATAAACAAAAGATGAAAAATGCTCACACATCCATAGTGAAATATAAATCATGTATTTGTTCCTTGAAAGCTAATACACCTGGCATTTACAGTTACAAGGTACAAAAAGAGAGTAAAGCTAATTAAGTAAATTTTCTTCATAAGTTA
>Locus_49345_76
ACGCGTCGTTTAAAACTATTCGATAATCAATTATCTGTGTTTGTAGTGTGTAAATTTTGCACTAAAAATGGATGCT
>Locus_49344_86
CACGAAATCTCACTGCTGAATGTTCTTGGTTATCTGCCAGTTTTTCAGAAAAAGCTAAAATTTCGTAGCATTTTGCACAGCTTGAT
>Locus_49343_123
GTTTGAACTTTTCATGACTCTACTATGCAACATTACAATCTAAAAGGTAAATAATACACTGGTTACACAATTTCTCAGCCATAGCTAAAGGTGACTAAAAAGATTTACAAGAAAGATCGGAAG
>Locus_49342_154
GCAGCGAGAGGAGCGGCCTTGATAAGTATGCGAACGGTGATCACGAATACCGAGAATACATATCCAGACATTACAGTGATCGGGAAATCGACGCAAGTCCGAAAGCAGCTTCGATGTCATACCTAAGACAACCCGTGCTCATCTAGCGTCTCGA
>Locus_49341_148
GTAGTGAACTTGCTTACGTATTACAGAATAATAGATCAAAACACAATTATATAAGCACGATAGACACCATACAGAGTGTATTAGTGTATGACAGTTTGCACAACATGAATAAAAGATGTTTTAATGCCAAATTGAAGTGACTGATTTT
>Locus_49340_94
GCCCTCCTATTTAATTAACCAGTGATTTCATTTACAACATGAAAAAGTATGAACGTTTATTTACAAAGCCGTGTTGCACAACAGTGGTTCTAAA
>Locus_49339_128
TTTTTTTTTTTAACGACTTTTTCTTAAAAGATCTTTAATTAAAATGTGAGTTAATGTGCCAAACAGTTACTGCTCCACTGATTCCCATCTACCCATTGTCACCACTATCTATCGGTTTCCCCCATCAA
>Locus_49338_74
GAATTGGCTTGTTCTACACAGTGAAAATAATGAAATCACTCTCCAGGAAATGGGAAACTCCCACATGGCTATCA
>Locus_49337_128
AAGATAGGCTGTCTTTTTCTTGTGACAATTAAGAAAGGAGATTACGTTGCTGCCGTTTGTACAATGTATAATTCTCGATCGAATGTTGTTCGCATCGGTCCAACAGGAAATGATGAAATGTGCAATTT
>Locus_49336_235
TTTTGTAGGGTGTTGACGACCATGTGACAAATTTATTCATTAATTATTAGTTTCTGTTAATGTGTGGAGCTTTTTGTAATCATTTTGGTTAGACTCTGTCAATTCAGATAAGATTAGTTCGACAATATATTATTTCAGATTTCCCCCCAAAAAAGCATGTTATTATGTCAAGCCGGTAAAAGAAGGCCCAAACCGTTTTGAAAGCTAAAAATGTAAAACAAATTTGTCAGTTAAA
>Locus_49335_86
ACCTTTATACGAATATACAATTGAAAATTTCATATCCATAATGCTTAATTCTCTTCACTTCAGCATCAAAAATAAATAGATCGGAA
>Locus_49334_143
AATGAAATATAGTTCATATTACATTGTAAAATAATTAAATCTGTGGTCCAATCTTATGCCAGAGGAAGTTTCTAATATGGAAGCAAGTTCTCTATCTTGAACTGTATTTTGTCTGGAATCCTTGAGATAATAATTGATTGCCC
>Locus_49333_77
TAGAGTCTCATAAATTATATCCATTTTTTGTTACAACAAATATTGCCGAAAAAGGGCTCAGATATAGATCGGAAGAG
>Locus_49332_139
TCACTAGCAACAGATATTGCAATTCAAGAACGTCATCAGCCAGATCCAAAGAAAGGTGGAGATCATGAACAGAGCTGAGTTTTCTCAACAATTTAAATTCGTGACTAAGCATGACCCCGATAGTATGGCTCAGCACAGC
>Locus_49331_127
ACTAGAGACTTACAGGTTGTATTCATCATGTGGTGAGTCCTCCAGAAGTTGTTGTAGTTCTTGTATAAGTTTCAGATCCAACACACTGTCAGCCAACACACTGATGGAGTCATTTCGGGTTTTATCT
>Locus_49330_122
TGAAAACAGGGTAGGTGTAGAATAACTTTATGTCTGAAATCAATTCCAATAGTGGAGATGAAACTGCCTGAAAGAAAAGTCCCATCCTTAAAACGGACCAGTAAACATGTCTTTCCAACTCC
>Locus_49329_132
CAACTAGCATAGCGGAAATCGCATACATTTGACAGCAAGGAGAGAAGGCCTTGTCTCATTTGAAATACTCGTGCATTTATTTCTTTCAAATTTAATGAGGATTTAATTCAATATTTTGAAGAATAATTCTAT
>Locus_49328_116
GACTCTAAAGGGCCTATCTTTCTGTTTCAATGCCTCCCACTTTGAATACGGGCATTTTGGACTACGTTCTAGGCACAGCTATCACTCAATCTTTTGCATCAGCGCTACAGAGTTCC
>Locus_49327_111
ATATTTTTTATTAATTTATTCTTTTCAAACCAGGGATTTCATCAATGATTGTTTCCTTCTATTTCTTGATAAAGTGATGTAACAATAATTATATTGAACATTTCTGCCAGT
>Locus_49326_101
[truncated: 14,532,553 more chars]
