# Supplementary material for: Short read Illumina data for the de novo assembly of a non-model snail species transcriptome (Radix balthica, Basommatophora, Pulmonata), and a comparison of assembler performance
Source: BMC Genomics. 2011 Jun 16;12:317. doi: 10.1186/1471-2164-12-317 (PMC3128070; doi:10.1186/1471-2164-12-317)
Supplement: Additional file 10 — NGEN assembly contigs. [file 1471-2164-12-317-S10.FAS]

>Contig1 11796 reads, 935 bases
GGCATTCCTGCTGAACCGCTCTTCCGATCTCTGACCTCTGACCCCTTGATGTATTCAGTGTAAGCTCCCATAAGATGGA
CTGCATAATAATTTCATTTTGATATTTTGATATTGTTAAAAATTTATCCAAACAATTTTTTATACTAATTATTATGAAG
ATGCTCCATCAATTGTTTCAGTTATTTCTTTAGACCTATCAAAGGTCTCGTTTCAATAGTAAAATGTAAAGACATAAGT
AAGTTCTTTTACTTTTTTTTTTTAAAGAGTAAAAAAATAATTATAACAAAAATACTTTATAACAAAGCCATGACATGCA
ACAAAATGAATTGACATTCAGAAATAACCAGATTGAGACATTCTTTCATTTTCTAACATGCACACACACCATTAACATT
CATTGTGAGGGGGAGACAATATTGTTAGCTGTCTTTGTAGGATGTCACCACTGAAAGTGATAATGCCCCTTTGATGTTG
TTCCCATGACAACAACTTTGTTTAGATGACAACAATCATGGGGGCTTGTGAGATCACCAGTTTTTGATGACGTCCAGCT
CAGGTTTGGTGTGCTCCATGTTTCATCTCACTTGTTGTACCAGACAAGGGCAGTCACTCACTTCTTGCATTCACTTCAA
GCACAACTGAACAGAATTAAAACCACAAGGCTTGGTACCGCTCCATATTAAGCTTCCTTCTCCTGATCAATTGTTTCTT
TGGTAGGCAGTGGGTTCTTCTCCGCTGTCTCGACTTTCTTCAACTTGTTTTTGTCGAATTTGGAGACTTCTGAAAGATC
TGGCTTGTCAGACATGTTGGAAGGGTGGCAAAGACTAGTCTACACAAAGATGGTCCCGAGACTGCGCTGTGTTCCGTGG
CGGAGCTGAGGGCCGAATATTACCCTGTTATCCCTATTTTTTTTTTTTTTTTTTTTSAATTCACCA
>Contig2 15748 reads, 561 bases
ATCCCTATTTTTTTTTTTTTTTTTTAAATACTTTTATATTTATTTGGTCAACATTATCGTATAAATCACCATCTAATGA
ATTCCAGTATATATTGTCACACATCAGACTGCCACACATTTGTTGGTGACCGTGTCACAGTGATAGTTATCTGGGCAAG
TCACTGTGCTCGGCATGCCCGTCATGAACAGGTAAAAACATGTGTCTCCTGGATTCAGGACCGTCACACAAAGATCACA
GCAGCCACAAAATCCACCGTTTTTCACCACCTTGCCGTTACAATTGGTGATTGGTGCGCAATCCGCGAGATCACAAATA
TTGGCTGAGCAGGCGATGGCATCCGTTGTGGTACAGAATGCCATGAGAATAGCCATCAGTGACACGATTAGCATTTTCA
TCGTTAAATATGAATCGATGTAAAGCAATTTCTTGGGGTAATGTTCTTGAACAGTAATATTACCCTAGACTAGATCTTA
TATCTTTGTTGGATCAAACTTTGTTGGATCAAACTATTACCCTGTTATCCCTATTTTTTTTTTTTTTTTTTTTAAAATT
TTTTTTTT
>Contig3 22887 reads, 689 bases
CCCTGTTATCCCTATTTTTTTTTTTTTTTTTTGACAGTTTATTGTTCAGTTTATTTTTTCTCGACAGATAAAAAAAAAA
AAATACACGAGACAGGAACAAGAGCGTCAGCGCGTGACATCTGACCTTACTCTGCCAAGGTTAAGGTCAGTCATAAGGT
CAGATAAGCGAAGGAGAGTGCAGAGCTGAGGGTTTGAGGCCACGTCACATGGGTCTCTTGATGACGTCTTGGTGGTGCT
GGTGGTCGAGTAGCTTTACCGTTTGCCAACGAACCTTACCGTGGGCGCCGAGTCGATCTGTTTCCGAATTCTGGCGTAG
ATGTCAAAGTACACGTAAAAGCAATCGACCGTCGTCATACCAGGATGACATAGATTCCAAGGATCCGAATCGTTTCGCC
GCTTCCTGTTTATAGGAACGTGTAGTCCGTCATCCTGGGGCGAGGCATCTGGAATCACATTGGCCATCAATTGTCCTGT
TACGAAAACCAGCATTGATATCAGGACGATGCTCATGTTTGACATTTTGGAGACTTTCGCAGGCACCACAGCGTCACGA
TGTAGGAGATGGTAGGTAACGTTATTACCCTTTTATTCCCCTGTTATCCCTATTTTTTTTTTTTTTTTTTTTTTTCCTG
TTATCCCTAGCCTATAGTGAGTCGTATTACAATTTTTTTTTATTTACACTTCATCGT
>Contig4 12586 reads, 1290 bases
AAAAAAAAAAAAAAAAAAWAAAAAAAAAAAAAAAAAAAAAAATAGGGATAACAGGGTAATCTTTTTTAATCTAGTTCCG
GTCGAAGCAGGATCAGGATTCAAGCAATCATGCCTAAACAAATTCAAGAAATCAAGGATTTCCTCTTGACAGCAAGAAG
GAAAGATGCTAAATCTGTGAAGATCAAGAAAAATAAAGACAATGTAAAATTCAAAGTTCGCTGCAGTCGCTACTTGTAT
ACACTTGTCATTCAAGACCGCGAAAAGGCAGATAAATTGAGACAATCTTTGCCTCCAGGTCTGGCTGTTAAAGAGTTAA
AGTAGATTTGATTAATAAAGGTTATTCAAAAAGAAAAAAAAAAAAAAAAAATAGGGATAACAGGGTAATATATAAGCCC
ACCCCACTTCCTGTTGGCAAGGTTGACGTGACTGGTTGACAGACGATTTTTGTGAATCACTTCAAAACTTGAGGCAACC
TGTTCCTTTACTTTGGAGAATTTTGGCTCCCATTGACAGTACTTTAACAGAATCATCAGGGAACTGATTGGGTGAAGGA
TCCTGTTTCTGGCTGTAAACTTATAAATTACTGACATTATAAAAATGACAAGATTTTTGACAATACTGGTCATCTTGTC
CACACTTGTGACAGTGTCAACAGCCATCACCTGGATGACCACCCTGAACGCTGAGTGGTCATTCGAGTGTCCAAAAGGA
AGGTCCATCAGATCGATGATGTCATCCTATGAAAACAATGACCGGTACTGGAACTTCACGTGTGACCTGACAGATCCTA
AACTTAACATCAGTTTTTGTGAGTGGAGTGGCTACATCAACGATTATGGAACAGCCTTTAGGTTCCAATGTCCCAGTGA
CGGCATCATCACAGGAATTTCATCATATTATGAACCCTATGACAGAAGGTACAACTTTCTTTGCTGCTACCCAGGGCCC
TACGCCGCGCATGCGTGTCAGTACACTCCTAATCTCAATGCACAGGGACAGCTTATGAGTTATCGCCTCCTGGAGTCCT
GGTATATCCGAGGAATCAACACAGACGTCGTCAGCAACGACCGCCTGCTGAGTTTGAACATTTGCAGACTGGACAAATA
TGTGGCTACCTGTTATTACTGATGACGTTTTAAAAAAAAAACTGATGTTAATATGTTAAGATAACGCTTCAAAAATTAC
GATCTTATATGAAAGGAATTTTTTTTACATTCCAATAAAATAATGAATTTGTTGAGGTATCACTGCGGTATTTATGAAA
TAAACATTATTCTTACTCTAAAAAAA
>Contig5 12560 reads, 613 bases
CTGTTATCCCTATTTTTTTTTTTTTTTTTTAAAGCATTTTTTAAAATATTTATTTATGACTCAACATCATTTTTATGCC
TTGCTGAAGCCCTTTTTGCTGCCAGAAGCCTTTGTAACTTTAATGACATTGTATTTAACAGTCTTGGATAATGGTCTGC
ACTCGCCAACAGTGACAACATCTCCAATCTCCACATCCCTGAAGCATGGTGACAAGTGAACACTGAGGTTCTTGTGTTT
CTTTTCAAATCTGTTGTACTTCCGCACATAATGGAGATACTCTCTACGTATCACGATGGTTCTCATCATCTTCATCTTC
AAAACACGACCAGACAAAATACGACCTCTGATACTGACATTTCCTGTGAAAGGACACTTCTTGTCAATGTATGTGCCAT
CTATAGCCTCTCTTGGAGTCTTGAAACCGAGCCCGACATTTCTGACATAGCGGAGAGCCTTCTTAGACTTCCCCTGGAG
ATAAGCCTTCTTGTTCAAGAACACTGTTGGCTGCTTTTGAAAAGCTCTCTCGATCTGATGATCGCCTGTAGCCATGTTT
GCTGGTAAGAAAGATTACCCACCAGATCGGAAGAGCGTCGTGTAGGGAAAGAGTGTAGAT
>Contig6 12574 reads, 853 bases
AATATCAGTAAATCAATTTATTTTTACTTAAATTTACAAAATAAAACATACCTTAGCATAACTTATAAAAATCCAAAAA
ATTTATACAGTAATTATATGATAAATAAATTGATTTGTGACACATAATGCTGTGCTGTTATGTTAATGTGAAATAGGTG
AATACACAACTAATTTGATTTATATCAGGAAATGATGTACCACAGAGTTCCTTAACTTAGTGTCTTTAAGGATTGAATG
GAACATATCTATAAACTCATTTTTACATAGACAAAATATAATGAACGAAATAAAGAGTTATTACAGGGTAATCAAAGAT
TAAATCGCTTTTCAGAGGACGAGTTTCCCCATTGCCACCAAGATGAAACTTGACATCACTAGGAAGGTGGACGTGAAGC
AGATGATATTGCTGGCGCCATTTTTATATTCCTTGATAACGTCCTCTACTGTGAAGGAACATGACAGCCCGTGACTCTT
GAAATAAGCCTCTGCTGCTTCTACCACCTGTTGCTCGATGCTAGAGGTGAAACCACAGTTCTGTGAGAAGATGCATCCT
ATAGAGCCTCGCAAATCCTTGCAGAGAAGATCCTTGTCGTCGGGGTGCTTGAGTGCATTGCTGACTAAGTCGTTCTGGC
ATTTGGTTAACCCAGAGCTACAATCATTGGCGGACGTCATTGCTACCAACATGAGCAAAACCACAAAGTAAAGATTCAT
CGCCATGGTGTCAAGTTTTAATATCCGTGTGTAGGTAAAGACCAGTTGACTTCGTGAATGGAGGGGTGAAAATATTACG
TAGTGTTCTTCTNCTCATTACCCTGTTATCCCTATTTTTTTTTTTTTTTTTTTGCTGCAACCT
>Contig7 11855 reads, 568 bases
GGGTAAKACARTAATACTTTGGCATATTTACTTCAACATTACAGATCATCGCCGTGTTACCAAGTGTTTTATACCTCAC
TCAATTCATCAATATCTGCTGTATAGAGTTGTTTGTGGTCCAGCTTAAACAATGGCTCATCTCATCCACTCCGCCTCTT
TGTTGGTATTTATCTTGACCACTGTGTCGTGTGCTGTTATCTGGGATCCTTGTGGAAATTACAATTGTCAAAATGGTGG
CAGCTGCACTGCACCAGCCGACGCCCCTTACTGTCTGTGTCCTAATGGTTTCACTGGCACTCACTGTCAGATAAAGGCA
CAATTTGTTGAGATTTCCCGTGACCCATGTGTCAACTATCACTGTCAAAATGGCGGACACTGCACTGCCCCCGCTGACG
CACCTTATTGTGTGTGCCCAGCCGCCTTCACAGGAACTCACTGCCAGGACGTTGTTTAATCAAGAGATTGCCGAGAAAT
AACGTCACTACTCATATATGATCTCGTAGAATCCATGTCCAATAAACACTTCTTTATTTACATTAAAAAAAAAAAAAAA
AATAGGGATAACAGG
>Contig8 12141 reads, 840 bases
TATGTCCAATGCTTACATAGAAACGGCTTTAATTTTATCCAATCAGAAGTCGCGAAAGACGATTTGTTGGGCACCGAAA
GACATGAAAACCTTCGACTGCTGCTAAGGGTTAGGATTATTAGAAATTACTGTGGGAAAGAAGTCTCATCAACCTGTCT
CCTCTTAAGCTCCATTTTGTTTAATAGTGAAGATTAACACACATACATAAAGCACCATGTCTGAACGAAAAGCCGTTAT
CAAGAATGCTGATATGTCTGAGGACATGCAGCAAGATGCTGTGGATTGTGCCACCCAAGCCTTAGAAAAATACAACATT
GAAAAAGATATTGCTGCCTTCATCAAGAAAGAGTTCGACAAAAAGTATAACCCCACATGGCATTGCATTGTTGGTCGCA
ACTTTGGCAGCTACGTTACCCATGAAACAAAACACTTCATCTACTTCTATTTAGGACAGGTTGCAATTTTGCTTTTCAA
ATCCGGGTGAAGTGTTGCAGCTTTCTTATGGACATTGTATTATGGACTATGTTTCTTCCCAAGATCCATTCATCTCAGA
ACAAACGTGAAGCAGTAAAGATAAAGTGATGCGAGCATTTCCAGATGTTTCTTTTCAAAATCAAGGGCTACTTCTATTT
CTTTAATCAACCATTTTTTGTGAGAACTTTGAAGTTTTCATGATAAAGCTTTAACGATCAAAATTGCTTTCTTAATATT
TTTTATAGTTGAAAAGTTGACAATGTGTTAATGCATGTTTGAAGTGGGTTATGCTTTGACAGATGTATATAATTTTACA
GTGTGAATGTTTTTCATACAACTGGTTGTGAAAGATGRTCGGGAGAGCGT
>Contig9 8548 reads, 755 bases
AAAAAAAAAAAAAAAAATAGGGATAACAGGGTAATCCTTTCACACAAAATTTCACCACAGTAGTGCAACGGCGTGAAAT
CGATTCACCATGCCTATCTTTGTGCACTCAATTCAGACCCATGTTTTGGACCTGAATCAGCAAAAAACCGTTGAGGATG
TCAAGTCATTCATCACTGAACATGAGGGTCTCCCTATGGAACAAATGGCAGTATTTTATGAAGGTCAACCCTTGGAAGA
TACATGTGAGCTGGTCACATTCAGGAATGAATCAACTTTAAACGTTGAGCTGCGATTGCTTGGAGGTAAAGTGCACGGC
AGTTTGGCTCGTGCTGGCAAGGTGCGTGGCCAGACTCCAAAAGTTGACAAACAAGAAAAGAAGAAAGGAAAGACTGGCC
GTGCCAAGCGCCGCATGCAATATAACAGACGTTTTGTAAATGTTGTGGCTGGCTTTGGCCGTAAGAAGGGCCCAAATGC
TAGATCCTAAATTCAGTTGAATTTTAAAATAAAGAGTATGTGTATAATTTAACTCAAAAAAAAAAAAAAAAAAAATAGG
GATAACAGGGGGCACTCATGCAAACTTATCAGCACATTACTTCGTGGCCTGTAACATGATGGGGTGATTGGTGTCTCAC
TGCCTGATGTTCCAGAAAATATCCAGAAAATAATAACCAGTGAGAAAGAAGCTTATGATGCTCCCAACAAAAGACCAAA
AGTTGAGATCGGAAGAGCGGTTCGTGTAGGGAAAGAGTGTAGAT
>Contig10 13180 reads, 673 bases
ACAAGGTCATCTGTGAGAATGACCAGACTCCTTGTACGCCCCTTATTACCCTGTTATCCCTATTTTTTTTTTTTTTTTT
TAAAAATAAAAACACTTGAATTTATTAGTAATTCTGAGATACAAGGGCCGTGTCCGTGATGATGTCTGCTCATCCAACC
ACACTGGTCTGACTTGAGCGAGTGATTGACATCGGGAATGTGAAGCAGACGAGATTGCCGAATTGTGCTTGTAACTTCC
ACATGACCACAAGTGAGATCTGAGGATATGTGTCAAGCACTGGAAAAGATGACGTATACTTGTATCTTTGACCTTTGAC
CACAGGGCAGGTTATTCCACTTTCCTTGCACCCATCTCCATTGGGCAGTGGGAACTCCACGGGGATAGATTCAACGATA
CCATAGACTTTAGAGTCGAGATTGATGGAATCGTTAACTGCAGTAAACTCTATGACCACTGTGACTGTGCTCCCATGAC
TAAAGGTACAAGGTTGTGTTGGACATGGGCTCAGCTCCACTGATGTCGCCTGTCCGAGGTTGTCTCCGGGACATGGCCT
ATATGCTATCTTCTCCGCACTTGCTAGGACAAACAGTGACACAAACCAAACCAAACTTTCCATCGTGGACGTTAGCTGA
CTCCTATTACCCTATTTTTTTTTTTTTTTTTTTTTTTTTTT
>Contig11 8381 reads, 563 bases
TGTTAAACWKAAAAAAAAAAAAAAAATAGGGATAACAGGGTAATCTTTCATCTCATACAAGCCACCATGAAGTCCTTGA
TCGCTGCCGTATTTGCTCTGCCATTGGTACTCTCCCAGTTGTCGGATCCGACTAAAGTTTGCTCCCCGGACAAGATCGA
AAGCGACGTCTACGATTTTAATAACAATGATTTCGGCAAGGTCGCCGCAGATTTTACAAAAAATTTGAGCTCTGTTTCT
TTTTCTAAATCTGGTCTCAAAGCGCTGTATGACTTAAGCTCACTCAAAGGTTACCTTTTTGCCACTGATGGATCGTGTA
CTTCCTTTAACCTTGACCCAACTCAAGTGGTCACACAGTGTTTGCCAGCCAACTCCAGACCACTAACAAATACCACAAC
TTCAATCGGCCTTGCCTCCAGTGGAGGACTCAATATTGTCAGCTATGAGGTGCCCGTAACAGCAACCGTCAGCGTTAGG
CTTGCCTTCACTGACTCCACACCTGCCTACCCAGTCCTCCGACAAGTTGTTGGTACAAACAGCRCTCTGACTCCACACC
TGCCTACCCG
>Contig12 15224 reads, 583 bases
ATAACAGTTACAGGCAGTGCATAGCTCCTCAATATTTGGTAATCCCAATATTTGATTATTTGGAGAGAGGAAGATTACC
CTGTTATCCCTATTTTTTTTTTTTTTTTTTTTGTTTTGGAATGCATTTAATCAAATAGGCATCGCATTGAATTGTGAGA
ATATCTTTATCTCTAATCTTCCTCCTTCCCGGGCAGAGCGCCTCTGATCACGTTCATCATTAGGTCGATTCTACAACCA
CATTCACGTAATCTTCAAGACTTCATAGCCTGAGAAATTTGAGCTCCACCAAAGCTCTAAACTATTCCCGTACAAGACG
CCTGACACCCACAGGCTTGGCATCCAATGGGACAGTTGAGCATCGGGCAAGGATTAAAAAAACACACTGTCTGCTGGCA
GCCAAGGAGATCGATGAGGTTTATACCTTCGGACCATGTAACCAACAAACAAGTAGTCAGTAGAGCTAAAGCGAGGCTC
AGTACAAACTTCATTTCACTGCCTATTGTTCTAAACTAAGCTTTCAATGACGGAGACAGAACTGTTATTACCCTGTTAT
CCCTATTTTTTTTTTTTTTTTTTTTTTTTT
>Contig13 9069 reads, 711 bases
GGGTAATAAAAACCAAACTTGATTGTAGAGAACAGAAATCTAAAATAAGAAACTGTTCTTGCAACTTGCAGAAGACGAC
CTGGAATAGTTGATTTAAAAGGTTATTCGTTCTAGTCGCATGCATCGTGAAATCATGACGGCAGTCTTTAAAATAGTGA
TTTCTGTTTATATGGTTTCGCTCTTGCAAGCCCAAGAGTCCAGTGTCGGGAAACCTTGTACCTCAAGTTTTGACTGCGG
AGTGACAGGATGCTGCTTGAAATCTCCCCATTCAACTGAATATTTCTGCTCACCGATGATCAAAGAACATCAAAAATGT
TACGTCAGCAATGACCGCTACCTGATGTCGTTTGGTTACACGGTGTTCAACTCGTCATGTCCATGTGACTTCCACTTGA
GATGTGATTACACGTTCGCTCAGATAGGCATTGAACACATGGATGAAGGTCAGTGCCGTGATATGATACAACTTCTCCT
GGAATGGAATAACCCACATTACATCAAGAAAGCCGTCAGCAGCTCGTGCTCTTCTGGGAAAGACTGCGCAGCAGACGAG
TGCTGCGTCAGCACAATCCAGCCAATCGGAAGAAAGAAGAGACTCGTTGGTAGAGGAGGTGGTGTTTGTACGAAAATTG
GGAAGACTGGTGACTCTTGCTTAGTGAGTGTAACAACAGCAGCCGACATGAACTGGGAATGCCCATGCGCAAWAGAGCG
>Contig14 33119 reads, 1120 bases
CTTATTACCCTGTTATCCCTATTTTTTTTTTTTTTTTTTCAAGTTACCAAACTCATTTATTACATTAGTTCAGTAAATA
TTCTCTCACAGCACAATCATTTAACTCATGGGAACATCACTCTGCAGTCTCTTGTGTCAGAGATTTAAGGTAAGCTTCT
TTTCTCTGGACAATGCGTGCCTTGCGTTGGGCATTGGACAATTTTACACGGTTCCACCTCTTCTTTTGTACTTGCTTCT
CAGCTGAAGGTTTGGCTTCTGGGTCAGCCCTGATGGCTGCGTGAGCTTTCTTGTACATCTCCTCAATCTTGTCACCAGT
AACACTGTTCTTAAGGAATTGTGAAAACTGTCTCTTGTAGGCCTCTTCATCATTCTCTTGGAGGTAAGCCATGTAATTG
GAGACATGCTTGCCAAAGATGTGATCACGATGAATCTGGGCATTGTAGTTTTTGGTCTCTTTGTCATATCCAGGGAATC
GACGGGTGCTGTGTGGAATTTCAATGCCACCATCAGCAGCTCCTTTCAAAGCGCCAAAGACTCTAGCACCAGTGGTGGT
GCGAACCAATCCAACATCCAAGTAGGCACGGAAGGCTCCAGGTGCATCAGCAACATCTTCAACATTGTACTCTTCACCA
TTTGCTTCAACTTGTCCAACGTAAGTCTGGTCCAAGTTAAACTTTTTCAGCAGTCTTCTGGCAAGAAGAAGTCCGGTGC
AGTAAGCTGCAGCATAGTTGGTCAACCCGACCTTCACGCCGTAGCGAGGCAGTTCATGTGAATAAGCTGCACAAACAAC
CACATCACCTTCAATACGAGCGTAGGCTATCTGACATATGATATCCTTGTTGGTGAAACGGACAATCATACGATATTTA
GGGGTGTTGTACTTGTTTTTGTCCTGGAAGATCAGTCGTTTTCTGGCATAGTAGTCAGTAACTCCCTCTCTCCTCCTCT
TGAATTTAACTTGAAATCTCTTGAAGTAGGCTTTATTCTTGATGACTTTAACAAACCCCATATTTAGGTTAAAATCGAA
GTTTATTCAACTCCGATTTTATATGATAGCTTCGGTCTCAGGGAACCTTAACCGGAAAAGATTACCCTGTTATCCCTAT
TTTTTTTGATCGGA
>Contig15 29607 reads, 906 bases
TTGTACTCCTGTCTGGACACTTGACCGTCCCCGTTGTTGTCGAAGGTATCGAGGTAATTGGCAACTTCAGCTCGTGTCA
AATGTCCATCAGCATTGGCGTCGAAATGGTGGAAGAGGGCCAGTTCAACAGCAACCCAGTTAGGTTGGCACAGGGCTAA
GGCCGGGAGGCAAATGAGAATGGCGAACAGGCAGTTCATTTTGAAAGTAGATAGAATTTTTGTTGTTGAAACTTTGTTT
GCAGGATAAAATCAGTAGACTTGCCCTGTTATCCCTATTTTTTTTTTTTTTTTTTGGCAGATGAAAATCGTTTATTTCA
GTTTGTCCTAAATTTTAAAATTTATTTTCTAGTCACGTCTATTTTCAGGGGCAGTAACCCTTGTGTGAGTTGATGTACG
GAGCACGGGCCAAACATTCGCCAAAGACAACATCACAGTGGCAAGCCTCGTAGGCACACGTGTAAACGGGGTCTAAACA
AGTGCAGGTGTTTCCATGGCACTCCTCGTGTGCTGCTGCCAGGTGTGGGATCAAACAGCTCGTGTCAGAGTAGCAGGCA
TCATGGGCTTGACAGCATCTGTCAACAGCGTCCACAGGGGTCCCCGAGCCCCCGAAACCACAGTAACAGCCATAGTCGT
TGAAGTCAAGGGCGCCACGGCCTGTGTAGGCGTTGATGATGGTGGCCAAGTTCAGAAGATCTCGTTTGTGTGACGTGGC
AGCAGACGATTGGGAGGCAACTGCAAAGAGCACCAGCAGAGCTCCGAGAACACATGTGTTGTGAGTCATCGTTAGTTGT
GCTTGATGTGTGTGTTAACAGCTACACACCTGAGACCTTCTGTACTTGGAAATATATTAGCCAGTTATCCCTATTTTTT
TTATTTTTTTTTTTTTTTTTCATGTTACYMGTCTTTT
>Contig16 8574 reads, 1013 bases
CTGCTGAACGMCGCTCTTCCGATCTGGCGATATTAGGTTTGTAAATGAATGAATGATGTCAATGTTTAAGGGTGGGTCA
CGTTTGGGTCAATAAGACAAAGTCCACAGTATTTGCGGCAGTATTTGTGTCCATCCACGGCGTCAAGGCAGATGGGATG
TGTCGTCTCATTCATCAGGGCACAGTCCCGGAGTGACAGCATGTCATCGCAGAGGCTGGGGTGGAGAGTAGGACATCCG
GTTTCGTCAGAGGCGTCTCCACAGTCGTTATCCCCATCACATCTCCAGTTAATGTTGATGCAAACGCTATTTTTACACC
TGAAGTGTGTGCTTTCATCACATGGGCAATTGTGTTCATCACTGTCATCATTGCAGTCAAAGTCACCGTCACATTGCCA
TCTTGAGTCAATGCATCGTGAGCCATCAGCACACAGGAACTGAGTGGCACCGCAAGTACCAGTGCAGTTTCTCTCATCC
CAGCCATCTCCACAGTCGTTGTCACCATCACAGACCCAGGTGTTCTCTATACACAGGAAGTTGTCACAGTGGAGCTCTC
CAGTCGTGCACTCAACTTTGTGACAATCGGTCTCATCAGTCATGTCTCCACAGTCATCATCACCATCACACATGTACTC
CCTGGTGATACATCTTCCATTGTTACACTTGAGTTGATGTTCACCCGTGCAGTCAGTCGGACAATTGACCTCATCGCTG
CCATCACTACAGTCTTTGCCAGTATCACAGAACCAGTCTATTTGAATACACTGACCGTTGGTACAATGGAACTCATTAG
CACCGCATGTCGTTTGTCTCTTGGAGTACATCTCTGCCTTGTGACTTCTGACGCCCCGCGACTGAGACTTCTTGAAGTT
CTTCTTGTTGATGCTGCACTCCGCGAGTGCCAACACCAGGGCCAAGACGACGGTGCAAAGTTTAAGCGACGCCATTGTG
AAGAGTCTTAAGATTTGATATTACCCTGTTATCCCTATTTTTTTTTTTTTTTTTTTTTTTTTTTT
>Contig17 10833 reads, 1104 bases
AAAAATAGGGATAACAGGGTAATTTTATTAAAAAGCGTGCAGGGAAAAGGACTTACAGTAACATTTCATTGCACCATGC
ATTCTCTCCTCTTAAGTCTCGTTCTACTTATTGCTGTAAATTCTGCAACAGCTCAGACATTTACCAATATCGTTGCGGC
TCTGAACTCCACTGGTCATTTTACGGTATTTAGTAACCTTCTGGTCAAGTCTGGGCTACTTACAGATATAAACAAATCC
TTACACTTCACGGTGTTTGCCCCAACGGACGAAGCCCTAGCCAAGTTGCCAGCGGGAACTCTAGCAGCCGTAGAGAATG
ACCCTGCTAAACTTGCTGACTTCATCGGCACCCACGTGGTTTTAACGGCAAGCTATCACTTGATGGGGACACAGCAAGA
CAGCCTAATCAGGTCCATAAACAACCATTGGATCAGAATCAACACTTACAACATTCTCCATACCGTGACCGCTGACGGA
GTCAACATTACCATTAAGAACATCCCGGTCTTCCATGGTACACTCCACGGCATCGATGGTGTCCTAGTCCCTCCCAATT
CCAGCGTTTCACAAATAGTCTTCAACAGGCCGGACCTGAGCGCCTTCAGAGATCTCTTGGTCAAGGCCAACCTGCTCAA
CTACATCACAGCCAGTAATGACGGCACCTACTTCATTCCCAACAATGACGCCATCAGCAAGTTATCCCCTACGGCACTG
GCCTATTTGCAAGCTCATCCTGCCGATCTGGCTGAAATAATCAAGTACCACATAGTCCGATCTATGACAGTCTTCACCA
TCGGTCTGAAGCACAGCCTGACCATGACCTCAGCAGACAACAACCGTGACCTGCTGCTGTTTTTGGAGGACGGAGCTGG
CGGAATCATCATCAATGATGCCAAGATTCTAGAGAAGGACATCATAGCCACGGATGGAGTTGTTCATGTCATCGACAAG
GTTCTCATACCGTCTCGAGTTCAAGCTAATATCGACGACTTTCGTCCTGTGATTGGTTAGTGCTTTAAATGAATGGAAT
CTGGTAGAAATTGTGGAATCAAATTAAAAAAAAAACTGACTTGAAAAAAAAAAAAAAAAAAATAGGGATAACAGGGA
>Contig18 8126 reads, 778 bases
ATAAAATTGTAAAAAAAATTTTAAATAAAAWAATAAAAAAAAAAAAAAAAAAAATAGGGATAACAGGGTAATAAGGGAA
AAGACAGTTGTTGTCTGCAAGGTAAGTTTGCTACATCCGGTGTCACAATCAAGACCCGTAACTCATCATGTACACAGCC
GTCTTATTAATTCTGCTAGCTGCTGTAGCTACCGGTCAGCTACACGAGTGTCCAGTGTGTACCGACGAGTACGATTACA
AGTCTTGTACCGGAGTTCGGGCTTGTCACGATTCTCATCAAATTTGCATGGTTAGGATCGATACCAGTATCAACAATAG
AATCGAATACTTTTGCACCAACTATAATATATGTGAGCTGTACGCCTCGCAGGGATGTAACCCTAGCAACGGTTTGGCC
TGCTACTACTGCTGTCTGGACATTGATGGCTGCAGAGGTCAAAGGGAAGCTTTGTTCATGGGTATACTGGCGGGCAAGT
AAACAAGCTAATGTCCAACAGCTGTGGACCAACAGACCGAACTCCTGACCACCAAACAGTCCCCTGAACCAGCATGAAG
TCGTCTGCAGCAGCACGCAGTCCATTGAGCCAGCAAGTAACAAGTCTGCTGACCCAACAGGAAATCCTTTAGCTGATTG
ATTGATTCTTATCTCACATGTGAACAAATATTTTGTACAGATAGAAACAATTGTAAACATTAAAHAAAAAAAAAAAAAA
AAAAAAAAAAAAAAAAAAAAATAGGGATAACAGGGTGGGATCGGAAGAGCGGTTCAGCAGGAATGCC
>Contig19 17849 reads, 969 bases
CTCTGTTTTTAAAGGCANAAANAAAAAAAAAAAAATAGGGATAACAGGGTAATCTTTTTTCCGGTTTGACTTCAATATG
GGCTACCGAGGACGCAGAAAGTCGCTAAAGCGATTAGCAGCTCCTAAATCATGGATGCTGGACAAAGCTGGTGGAGTCT
TTGCACCAAAATGCAGTGCTGGACCCCACAAGTCACGTGAAAGCTTTCCATTGACACTTTTTTTGCGCAACCGACTCAA
GTATGCGCTTTCTTACCAAGAGGTCAAGAAGATTGTGAAGCAAAGACTTATTAAAGTTGATGGCAAGATCCGCACTGAC
AATTGCTATCCCACTGGATTTATGGATGTGGTGACTATTGATCGCACTAATGAGAACTTCCGTATCCTGTATGATGTCA
AGGGCAGATTTGTTGTTCACAGGATTAAAGCAGAGGAGGCTAAGTACAAACTTTGCCGTGTCCGCAAAGCTGCAACAGG
TCCAAAGAATGTGCCATACATTACAACAAACGATGGCAGGACTATTCGTTACCCAGATCCATTGGTCAAAGTTAATGAC
ACCATTATGGTTGACATTGCTTCAGGAAAGATGAAAGAGTTCATCAAGTTTGATACAGGTAATCTTGTCATGATCACCG
GTGGGCACAATTTGGGTCGTGTTGGCACCATCACTCATCGAGAGAGGCATCCTGGTTCCTTTGACATTGTTCACATCAA
GGATGCACTTGGACATACCTTTGCCACCAGGTTGTCCTATGTCTTCATCATTGGTAAGGGCAACAAACCCTGGATATCT
TTGCCCAGGGGAAAGGGCGTGAAGCTAACTATTGCTGAGGAGAGAGACAGAAGAATAGCTGCCAAGACACAATAAACAT
TAGCGTCCAATGTTAATGTACACCTGTACCAGCAGAGATGTTTGATTAAATTACTGTACACTAAAAAAAAAAAAAAAAA
TAGGGATAACAGGGTAATAAG
>Contig20 18493 reads, 917 bases
GGGATAACAGGGTAATATTCCACGTTATCGAATTACACCGTCCATTCTTCCTTTACTTTTTATATCTTCGGAGGTATAG
TGAAGCACAAAGAAAATGCAAATCTTTGTGAAGACCCTGACGGGCAAAACTATTACCCTTGAGGTTGAGCCATCTGATA
CTATTGAAAATGTCAAAGCCAAGATCCAAGACAAAGAAGGGATTCCCCCTGATCAGCAGAGGTTGATCTTTGCTGGTAA
GCAACTTGAAGATGGCCGTACGCTGTCTGACTACAATATTCAGAAGGAATCAACCCTTCATCTTGTATTGAGGCTGAGA
GGAGGCATCATAGAGCCTTCCCTTAGAATTCTTGCTTCTAAGTTCAACTGTGACAAGATGATTTGCAGAAAATGCTATG
CACGCCTGCATCCACGTGCCACCAACTGCCGCAAGAGGAAGTGTGGGCACACAAGCAACATTCGCCCCAAGAAGAAGCT
CAAATAATATCTTCGTTCTACTCGGTGTGACCTCACAAGTTTACTTCCTTTGATTTTACAATCATCGGTTGTTGTTTTT
CTTTAATAAAAATAAGTGTGGCAATGCAAAAAAAAAAAAAAAATAGGGATAACAGGGTAATAATCTAAGATGAAGCATC
AGAAGTTAGATGCTTACAAATCATACGGAATCACTGATGACATAGCCTTCCTATCTGAAGTGAAAATATGAAAGTCATA
GGGAAATAATATGATATTAAGCTACAAGAGACAGAATACAAGGGAGTGAAGATTATTATCTACAGTTGTAATTAAACTT
CTTTTTTGGTTGCTGCTAATATTTAAACTGTGTGAGTTTTATGTATACAATGTGACGATTCAACTGTAACAGTGTGAAT
ATCGAACTGTAGCAATTTGAGGATTAAACTGTAACAATATCACGTACA
>Contig21 9757 reads, 660 bases
TTTTTTTTTGAAGAATTTACATAGTTATCTTGTTAACGTTTTTAAAGATAGAAACAATTTTTGTTTTAATATTCGGCTA
TGCTTTGTTTATTATTGGATTCCTCTGGAGCCTTGAAACAGTGGGGGCATCGCTAAGAAATGATCATTTGAAAAATTGA
CAAATTATTTCATGTTTTTCTAGGAGAAGCGAGTTCAAGCTTTTGATAAACTCCGTCTTATCGAATGCGTGATGGCAGC
GATTAAAAGCTTCATCTGTTACACAATCCACGAAAGTTTGCAGAACGCTACAAATCTCGAGGTTTTCCCGAGGGTACAA
AACTTCATGCTTCAGCTGAGTGATTGCGCAGTTGCTGACAATCCCATTCACATTGCAGACTAGTTCGGCGCGCACGCAC
AACACCGTAACGGTAGTCAGGAGGATTACGAGTCTCAACATTGTAGCGTAGTGTGGATGAAAAATACACGTCTTTTGAT
GGCGGCTGTCTTCCTTGTGTTATTACCCTGTTATCCCTATTTTTTTTTTTTTTTYATCTAACGATAGGACTTTATTTTC
TTTATGCTGACGTCACTTTCAGTAGACTTGCAACCACCAAAACTGAAACATGCAACACAACATCACGTNACCCGAGACA
NCCNACGCNANTTTTGGATGATCCGAAT
>Contig22 13947 reads, 681 bases
CTGTGGGCAGTGGATCATGGACATGACGGACAGACAAGTKCCACCCTGTTATCCCTATTTTTTTTTTTTTTTTTTTTCC
TTGCACTATGCTTTTATTAACATATGGGGTCCATTCCCTTTGTTAATAAATACACAACATTACGTATGTACGTATTATA
TTGGATGTATAGACGGCTTAATATAGACGATAGGGCTCATCCATTCCTACACCTTCCCTTATTAGAAGCGATGTACGAG
GCTTTAGCCAGGCACTGACCAAAAGTGACGTCACACTGACAGGCTTGGTATTTACAAGTGCCGCGTGGATCTTGACACA
CACAACCGGCACCGCCACACTTGAATGTATACGTCGTTAGGTGAGTCACCGAACAGCTTGTCCCGGTGTAGCAGTCGTC
GTGGGCCTTGCAGCACCTATCCACAGCATCGACAGGAACGCCAGAACCACCCAGACCACAATAACATCCGTAGTTGTTG
TAATCACTGGCGGATCTCTTTGTGTAGTGTTTAATGATCTCAGTCAGCTCAATGAGACTTCTTTTCACAGTTTTACCAT
TTGTATCTTGGAATGTGACGACCTGGTTGGCAATGTCCCACACATGGATATATACCCTGTATTACCCTGTTATCCCTAT
TTTTTTTTTTTTTTTCGGAAGAGCGGTTCAGCAGGAATGCCGAGACCGA
>Contig23 18175 reads, 758 bases
AAAAAATAGGGATAACAGGGTAATATTGTAACAGGCGTGAACGCCCAGGCAGGTACGACTGTTGACTTATTGCCCGATC
AAAACCGACCAGTGAGTACTTTCTGCCACCTTCACAGTTAGACCGAGTCCGTCAGGCAGTGATCGCCCGTGTTTCCAAG
GACCATATCAGCTGACATACAAGTCTGCTTGCGATTGTATGTGCTACTGTTTGGTCAGTGTGGACTGTGTGGTCAGGAT
GAAACAAAGTGCATGCAAACAGATTTTTGCCGTCAGCGCCATTGTTTGTGTTATTGTCTGCTGCCTACCACTCAGATCC
CAGGCCAGGAGTTTGAATGACCTAATTGATGAAGACTTTATGCAAACCGACCAACTCGACTCACCGAGGCTAAGCCGAG
AGACAACTTTAAAGCTCCTCTCCACCCTCTTACGACTGGATATGGCGCCCCAAGTCCAGTACGACTCAGAGGCCAATGA
CATGTTGCGATCTCGCAAGTCGACTTCACGGAACAGCAACAGGAGGCCACTGGATGAGCCTTACGAGACAAAACGTGAG
ACGCAGTGCTTTTGGTCCGTGGTCACCTGCTATTAATAATACAATGACGTAGTACGCATAAAAAAAAAAAAAAAAAAAT
AGGGATAACAGGGGCCCCACAGTTAAAGTAGAAATAAATCTCTTTCTCGGTACCATCTCCAAGTCCGGTCAACTGTGAC
GCTATGGGAACTAGATCGGAAGAGCGTCGTGTAGGGAAAGAGTGTAG
>Contig24 12364 reads, 615 bases
TTTTTTTAAAAATTTTAAGGCACTTTTTTTTGTAAGACCCTGCTAGAGGCCCATTATTTAATAATTCCCAACTGAAGGT
AGCATTTATTTTGACTTGAAATACTCTCGAACAACATCAAGCGCTTGTGAGTCTTTACCATAGTCTTTGACAACAACAG
CTCCACAGGCATTGACCTTTCTGGCTTTGCCCTCCTTATCCAATTTGCAAAGTCCAGCCCATTCACCCAACTTTTTGGC
ATCATCAACCTTTAGAAGGTTAATACCATGTTCTGCACACAAAGCCTCAATCAGTTTGGTGTACAATGGCTCATCAACA
CTGTTTGCCAAAACACATAAATGAGCTTGACGCTTATCGAGAGCTTTAGTGACTTCTTTCACACCACGGCATAATCCAT
CATGAATAAGGGCCGTCTTGAGAACCTCTTGCAGGGCTTCATAAATGTCCATAGGGGCACTGGAATCTTTAGTGGCAAT
AGGGGTTGCAGCACCCACAGCTGGGACATCGTCTCCTTCCGCGTCAGACATTTTGAAACGGATATCCTTAAAGATGTCC
CTGTTAAAGAATCTTAAAACAGGAAAAAGATTACCCTGTTATCCCTATTTTTTTWCCCTGTT
>Contig25 2237 reads, 956 bases
CTAGTACCTTCGGTTGTAACTAATTACTCCAAATTTTACGAGAAACTTAATTATTTAAAAGAATATAGAAATAAGTTTG
TATTGATATCTTCAACGGATAACCAGTTCAATTGCCAGATTTTTACAGTGTTTTGGTTTTTACAAAGATGAGCACGGGA
GCCCCTAACGCCTATCAATCGACAGGAACTTACGTCACGTCACAACAAACAGTTTACACACCTGTGCCTAGTTACCAAA
GTGAAATACACTATCAGCAGCCAAACACTAAAGTTATCTATGTCACGGAGAGAAGAAGGGACGTAACCGATGGAGGAGA
GGAATGTTGTCTATTGGGCTGCTGTATGGCCATGTTGTGTTGTGCTGTGATGAACAATTAAGATTTCTCAAGTTCTTCT
TTACAAATATGAAAGAGATGCGTTTTATGCCGTGTGTGACAGAAACTGACAACACTTCACAGACCAGTGTGACAGAAAC
TGACAACACTTCACAGACCAGTGTGACAGAAACTGACAACACTTCACAGACCAGTGTGACAGAAACTGACAACACTTCA
CAGACCAGTGTGACAGAAACTGACAACACTTCACAGACCAGTGATCTGATGCTTGCTAACACTCAAAACTATTGGCAAC
GGAAAACATTTATTGTAGAAATAGTTCAGCTTTTAGGGAAAATGTTATATCAATTACGAAGTTTTGTTTGAGTACTTTA
TTGTGTCTGATATTATCGCAGCTGAATCAATCATTTTTTGGCTCCGCACTTTCAGGTGCTATACTGTGACAATAGACTT
TGGTTGAGAGTAACCAGAATAACTAAATAAATAAATGTAAGTCGGGTCTCAGCCTAGCGATCCTGTGTTCAACAATTCT
CAGTGAACTAAAGACTTTCATGGAATGTTCTTTTTCATTGAAAACCATTTGTAAACGCAAAAAAAAAAAAAAATAGGGA
TAACAGGG
>Contig26 10200 reads, 934 bases
ATAAATAACACACCCTAACTAATMAAWAAAAAAAAAAAAAAAAAAAAAATAGGGATAACAGGGTAATATGCCTCGACAA
CCATTCCATTTAGTAGAATTTTCACCTTGACCTCTATTAATATCATTAAGAATTCTAGCTTTACCTATCGGGTTAATTA
ATTACTTACGAAATGCTGATTTAAACTTATTACTGCTAAGATTTGTTACTACTAGTATAATTTCTATTGTTTGATGGCG
AGACGTGATTCGCGAATCTACTTTTCAAGGTTTCCACAGAACTAATGTTACAAAAGGTTTGAAGTTTGGGGTTGCCTTG
TTTATTTTATCTGAAGTATGTTTTTTCTTTGCATTTTTTTGGGCTTATTTTCACAGTAGTTTAGCCCCAACTGTAGAAG
TAGGGGCTCACTGACCACCTACAGGGGTTGAAACATTAAACGCATTTCAAGTTCCTCTTTTAAATACATCAGTACTTTT
ACTTTCGGGTGTAAGAATCACCTGAGCACATCACAGTATCGAAGAAGGTAAGTATTTCTCAGCTATTCAGGGTTTATTT
TTAACTGTAATATTAGGGTTTTATTTTTTGGTTTTACAATATGGAGAATATATAGAAACTAGTTTTTCAATGGCTGACA
GAATTTATGGTTCCTGTTTTTTTTTAGCAACTGGTTTTCACGGTACTCATGTTGCTGTGGGTGCTACTTTTTTAATAGT
ATGTTTATTACGTTTAATATCATTTCATTTTAATAAGCAACACCATGTAGGGTTCTTAGCTGCAGCTTGGTACTGGCAT
TTTGTAGACGTTGTGTGATTATTCCTATACGTAAGAATCTACTGATGGGGTTCATAATGTTTTTACAGAAAAAAAAAAA
AAAAAATAGGGATAACAGGGTAATATGCCGCTGATTTCCCAACAATCACAGTCACACAATTAGAC
>Contig27 28136 reads, 688 bases
ATTTTCTAAAAGCTGGTACAMAGGTAAATTACTCCTGTTATCCCTATTTTTTTTTTTTTTTTTTTTTTGAGATTTAACT
ACATCCTTTTATTTGTTATTTAAACAATGTGCATTATAAAATAAAAATTGAGAGAAGCACCTCTCAAATATTGTAGTTT
AAACCGATTCATTGAAATATGCATTACCATTATACAAAAGTTCCATCACAGTAATGCTGCCGTCACCGTTCTCATCAAA
CATGCGGAAGATGTGGGGAAAGTCAAGGTTGTTGAGAACTTCGTCTTTCACTCTGTCCAGCTCCAAAAAGAAAAGAGGA
GCGTTTTCTGGGTGGGGCAAACTCTCTCGTCTCCAGACAGTGTCGAACTCGAATTTGTGGATTTGGCCGTCGCTGTCGG
TATCAAAATGGAGCCAGAATCGGTTGAACTCTGCTTGTTGGATCTGGTTATCGGCCCCTGCATAAGTGGCAAACAGCTG
AGCAACTGGGTTGTTTCCTCCTGGCTGTGCCAGCGCGCAGGCGAAAAGAGAAGCTAAAATAGCGATAACACTTTTCATG
GTGATTGTTGGCTAGAGAAGTAATCGGTGGATGTAAGTATTACCCTAGCCTATTATCCCTAGCCTATAGATTACCCTGT
TATACCTATTTTTTTTTTTTTTTTTTTTTTTTTTAAAATTTTTTTACATACATTAA
>Contig28 23695 reads, 828 bases
ATAACAGGGTCGGTTGTTGTAGCTGCTATCTGTGTTGTCACTGGCGTGTCAGGGAAAGATCTGATCGTCAAAGATTGCA
CGAATCTAACAGTGGCCTCCCCCCTTGTGACTATACACAACTACAGCTTTGTGCCCTATCCCATCCAATCACCTGGACA
GCTGACCGCGTCTCTGTCTGCCACACTCAACAGGCCGATTCCAGATGGCGGCCTTGAACTCAAGGTCAATATTCAGAAA
GACGTCTGGTTTTGGATCACCATTAATTGTAAAGACAACTTTGGAAGCTGCAACTATGACCTCTGTGACCTGTTGACCT
ATTTTGAGAACACCACCTGTCCCCAACAGCTGATCGACAACAACATACCCTGCACGTGCGACACCATCGTCCCGGGCAC
CTACAACCTCGTCAACCAGGTCTTCCAAGTACCTGACATCAAGACCATTAGCTCGTTCGCTTTGGGCAACTATAAGGTC
CAGTTCAGCCTTGTGGACAATGTCACCCAGGAGGAAGTCTACTGTCTGCATGTGGAGCTCACGGTTGAAGATCCCAGCC
ATTGCAGTGGATTCCTGTGTAGTCTGTTCGGTCGCCGTAGTATAAGCGACCTCTGGTCATGGCTCTTCTAAATGACGTC
ATCTGAACCTCGGAGTCAACGCCGTAACACTTTGGCCATATGACATATGACATTAAAAATAAATGAGGATGATTAATCC
TTGTTCCCGTATGGAAATAAACATGACTTTAGGAGAATACAAAAAAAAAAAAAAAAAATAGGGATAACAGGGTAATAAG
CCCTGGCTCAAAGACCGCTTTATGGCCCCTGACATCGA
>Contig29 12463 reads, 754 bases
ATGAGGAAMAAAAAAAAAAATAGGGATAACAGGGTAATAAACCCACAAAAGTTTGTAATTTAAAAACGACGCTTGACAT
TTGATTTTGCATTTCGTCGACAGCCATCTACTGCATTCACTTAAAATACGAGCCTCATCTCCAAACACAACCACAGCCA
TGAAGTGCTTCGTTGCCCTCGTTGCCCTCGCTCTCCTGTCGGTGCTTGTTCTGTCGGTCCAGTGTCAGGATCCACTCAA
GGCCAAGGTACTGTGCATCATCGAGACCCTGTCGTCCAACGCCTGCAAGACAACGGCCCGCAGTCAGGCCAACACCAAC
AGTGACCCGGCCACCGCCTGTGGCACGTTGGAGACCTTCAAGCTCCTCCTCCCCCTGGTGGGCTGTACCCACGACGACT
ACCAGAAGCTTCACTCGGTCATCTGTGAGCACATCGATGTACCCTGCACCCCTGCATAGACCTCAATGGACTCATCCTT
TTTTACAATAGTTTATTAATTTAAAAAATTTAAAACATGTTAAAAACTGCATTTTGAAATTAAAACAATTTGTTTAGTT
GTTAATGAATGAATTAACAAATGTTGTATTAACGTTTAAAATATCCCTTGTGTGACGGCAAAAAATATTTTCAAATTGG
AAAACAAATTAACCAGAAATAAATTTTAAAAAACAGATTTTCACTAAAGATTTTGTTCAAGGAATCAATAGAGTTAGAT
TAGCAGATCGGAAGAGCGGTTCAGCAGGAATGCCGAGACCGAT
>Contig30 13692 reads, 709 bases
AAAAAAAAAAAATAGGGATAACAGGGTAATCCTTTTTTCTCTTCCCTCACCCAGACGGTTTGGTGCAACAGTTTTTGGT
CGTGTCTATCTGGACTCATCCAACACTACAACCGTTATATTAGTACTATAAAATGCCTCCCAAATTCGATCCAGGAGCA
ACATTCACAGTTTACTGCAGAGCAGTAGGAGGGGAAGTACCAGCAACTTCATCACTTGCCCCCAAGATTGGTCCCTTAG
GTTTGTCCCCAAAGAAGGTTGGTGATGACATTCAGAAGGGCACAGCTGACTGGAAAGGTCTAAAAATTACAGTAAAGCT
TGTGGTTCAAAACAGACAGGCAAAGGTTGAAGTTGTACCTAGTGCAGCAGCCCTGATTATTAGGGCTTTGAAGGAGCCA
CCCCGTGACAGGAAAAAGGTTAAGCATGTTAAACACAGTGGCAACTTAACCATTGACGACATTATCAAGATCGCAAGAC
AGATGCGTTCACGAAGTATGGCCAGGGTACTTTCTGGCACTGTCAAGGAGGTTCTTGGAACTGCTCAGTCAATTGGTTG
CACAATTGATAAACTTCCCCCACACTCAGTCATTGAGAAAATCGACAGTGGAGAAATTGAGGTTCCTGATGAGTAAATG
GAAATAAAATTTTAATACTTTAAAAAAAAAAAAAAAAAATAGGGATAACAGGGTAATTGAAGASCATAACATTGTTG
>Contig31 7155 reads, 948 bases
AAAAAAAATAGGGATAACAGGGTAATATAGAGACGTCAGCCAAAAACTGCACGCAATTTAACGAAAAAWTTTTTCGCAA
ACTTTCCGAAAATGTTCCAATTCTACCTAGCATTGTCTTTTGCTGTCATATTTTGTGAATGCAGCCTGATTAGGAAGGA
AGTAGTGTCTAAGCGAAGTGATTCATGCAGTGAGCTGATGGCGTGTTCTTTCCCACTGGCGGAAGTTGAGTCTAAAAAT
GCAGGGGCCATAACCGAGCTTTCTGACGAGGCTGTTTACGCCCGATTCTGTCAAGAGTTCCAGACATTCAAAAGCTGTA
TTGACGATAGCAAGTCTCAGTGTGACAATGAAGGTGTCCTGAATTCCCTTGAGGGACAGGTTGCAGTAGCTGACAGCAT
CTGTTCCCCAGAAGGCAAAGATGCGACCTTTGCACTATCTCAGTCCGAATGTGCAACCAATGACATCAAGAGACTGGAA
GCTCAGCAGCTTATGGACGAATGCGCAGAAAACTTCTCGAATGAGCTCCAGGTCGCCATCATTGGAGCCTTAGCCACTG
ACCAATCTTTAGAGTCATTCAGTTTCTGTCCCTACCTGGATCAACTAAACAACTGTGTTGTTCAAGGAGCCACTGCCAA
GTGTGGCCAAGAGTTTGGTGGTTTCTTGAGTCAGATGTGGCAGACTGCAGCAAAACCAAGCTTTGAGCAATTCGGTTGT
GACTTCCAGACTAGACATGCTCGTCGATTTGTGAAAGCCGTCTCTGCATTCCTGGGTGAATATAAAAATCTGAAGCGTT
GATTTCTCACGACTAATTACACTTACACCAATGATGAGAAATAAAATCATGAATAATGAAATATTTCTTTCATAAATAA
CATAAAAATCGTTTATTAAATACCATTATACTAAATTCGTTTTATGTCATCAAATTTGAAATAGAGATCAATATTAAAT
>Contig32 22111 reads, 907 bases
ACCCTGTTATCCCTATTTTTTTTTTTTTTTTTTTCAACAGTCTCATAATTTATTGTAATTAGTAAAATTATTCTTTGTC
CTTTGCAATTTGCTTGGTACCTCTCAATTTGCCGGTACGACGAGCAGCAATAAGACCAACCTTTTTACCAGCAGAAGCA
TCACGCCTGACAGTAGATGCTTTACCAATGTGCTGATGGTTACCACCACCATGGGGATGCTCAACGGGGTTCATGGCAA
CACCTCTGACTTTAGGCCAGCAATTCCTCTTTGCCTTGTATTTGTGGTATGCACGACCAGCCTTCAAGATAGGCTTATC
AATACGCCCACCTCCAGCAACAATACCAATCATTGCTCTGTTTGCAGAAAAAACAACTTTCTTAGAACCAGATGGCAGC
TTTACTCTGGTTTTCTTTGTTTCTGGGTTGTGGGAAATGACAGTGGCGTAGTTGCCAGATGTGCGGGCTAACTTTCCAC
GATCTCCACTTTTCTCCTCAAGACAGCAAACAATGGTACCCTCAGGCATCATACCAACAGGGAGAATGTTGCCAATCTG
CAATGATGCTTTTTTACCACAGTAAATAAACTGTCCAGTATGCATCCCTTCAGCCGCAATGAAGGTCTCAGTGAGCATA
CGATATTTATATGGATCACGAAATTGTACCTTTGCCAAAGGAGCACCACGACCAGGATCGTGAACTATGTCACGAATGA
CACCTTTAATGTATCCATGTCTTTCAGCAAAATCTACAGCTCTTAATGCAGCCTTTCCTTTCCTATTTTTAGTATGGGC
CTTGAAAACTGACCCTGGACCTTTACGCTGGGATCGAATAACTCGGCCCATTTTCTTCGGCCGGAAGTTACAAAAAAGA
TTACCCTGTTATCCCTATTTTTTTTTTTTTTTTTTTAA
>Contig33 2936 reads, 626 bases
ATCTACACTCTTTCCCTACACGACGCTCTTCCGATCTCTCCCGTTCCCGTTCCTGGCACTCTGTACATAGATGCCCAGG
ACCATAGTCTTTGTCCAATTCACATCTTCCATGTTTACGGCAGTAATGATTTATTATGCCGCAGCTCTCAAGGCAACTT
GGATTCAAGGAATCGATTCACAACGTTTTTTTAAAATATTTTTGTTGAATGTCGAAACATTACCCTGTTATCCCAATTT
TTTTTTTTTTTTTCACATAAACACTTTCTTTATTGGCCAATCTTTAAAGATCGTCAAATAATATTAATAACAGTAGGTG
GTGAACCCATACAAAAAGCCTGGCAACCCCCTCTGGATGGAAAATTGTTTCGATTTCCTTTGCAACCGCCAAACTGGAA
ATCTTGACACTTTTTGGTCTCTTTATTGTAGTAATAACTTGTTGTCATGAAAAAGGTACATGGCCCAGGATCGACTGGT
AATAAACACAAATCTCCTTCAGGGTAAAAGGAACCGTCCTGCCAAATTTGGTCCCCGTCCGTCATTTGGTTTTTCCGTG
GTTGTCTAACAGAAAGTCGAAAAGTGAAACATACAAACATACAAACATACAAACATACAAACACCAACTGAGC
>Contig34 12736 reads, 694 bases
TTTAAAAAAAAAAAAAAAAAATAGGGATAACAGGGTAATACTACTAGATACTTGGACACATCTCAGCCATGGACTTTAG
TCAAACAGATTTGCGTTTGCTGATAATAACTTTCTTTTTAGCTGTTACAGGTGCACAGGTTCAGCTGGTCGCTACCCCA
TCAGAAATACGCCTTTGTTGCACGGACACTCTGACCATCAACTGCACGTTCGCTAGGAACACCACCACCATTACGTTTG
TGGCATCTGTCTTTATATTATACCAACCGTTCTCAAGTACCGCCCCCTTTGATGACGTGGCTTCCGTCTATGAACACGA
TGACCTGTATGACCTCCATTCTTACTCTGATGACGTCATCGTGGCTGGACTCCTCAACAGCAAGAGGGACGACTTCCTC
CTGGTCCAGTGGCTGAAACCAACAGCTCACCAGGCAGGAAACTACAAATGTGTGGTCAACGGCATGGATGAGGTGGGAC
ATCCAATAGTTATCTCCGCTGATACACAAGTTTCGGTATCGACTGCGCGATCTTCGGACTCAGATGCAGATTTCACAGA
AATCCAGGAATAATTTTACGATCTCCACGAATATTAGACTAGTCTCAGATGGTGATTTGGAGAAATAAAAGTTGAATAG
ATTGAGAAAAAGCTGTATACAGACAGATTTAGATTTTCTTCGAGGTGGAAGAGCGTCGTGTA
>Contig35 9706 reads, 585 bases
AAAAAAAAAAAAAAAAAAATAGGGATAACAGGGTAATAGTTTTTAAACTGGAAATACTTAGTTGTGCTAGAATGTTTAC
AATCTTCCTCTTTGTCTTAGCGGCATCGTCTGTATTTGGTCAGCTCCAGTGCCCACAATGCTCAAACTTATTCGACTAC
ACAACTTGCACCGGAGCAAGGACGTGCCACAATTCACATGATCTCTGTATGTTGAGGATTGATGTCCACCTAAATAACA
GAATCGAATACCATTGTTCAAATCCAACTGTTTGCCAAGATTTCGCTGCCACGCCGTGTGACCCGGTCCACGGCAACAC
GTGTTATTTCTGCTGCACTGACCTTGACTCCTGTCGGGGTCAACGCAACGCCTTGTTTATGGGTATTCTGGCCGGCGGT
TGAAGATCAAGACTCACAGATCATTGATGATCGACTTGATAGATTTGATCGATTTGATCGACTTTACACTTCAGATCTT
TGGGGAAAGGAGATGAGCTATTGGATAAACTAGGAAATAAATTGTATTACAATTAAAAAAAAAAAAAAARATAGGGATA
ACAGGGWAATCGAGAGACGATGGTGCATCACC
>Contig36 16220 reads, 980 bases
TTTTTGACTTGATCATTTTAATTATTACACTTCATTTCAGAACAGAAAATGTTACAGCATTCCAAGAACCATATACATA
TATAGAAAAAATGCTAGTCTAGTTGTACATATTAAAAAAGTAACAGACTATGTCTGAAAAAGCACCAGAATCGAACTAA
AAATTCTTGACTAGACATCGAAAATTGTACCATTAAAAGCCATAAGTTGAGAAACTTTTATTAATAAGTTCATAGCTTG
GAGGAGATTCAATCATTTTAAAAAAAAATGTTCCTTGTCTTAAACAATTTTTATGGCTCAAAATCCTTCCACAAGGATC
AGAGGATGACATATCAGCACTCTTTACGATGAGGTGTGGCATAAACCTGTTGAACAGCTGTTGTGGTGTAGGATGGAGG
TGGGATGCCTACTGTGCACATTTTCTCATCAACAGGGATTGGCATCTTCTCTATTTCTCTGTTATCCCTATTTTTTTTT
TTTTTTTTTTGCATCAATGAAATCAACAAACACATGGTTGTGAAACTTTATATTCTAATTGGTCTGACAGGGGTAAAAG
AAATGAATCACGCATCACTCATTCGTCTTCATCCAAACAACTGACACGAATCATTCAAGTCATCCATTCTGTCTGCATT
CACAGCGAGTTGCCCATCCACCGAGTGCCAGCCCCCTCATTCCCCCTTCTCACAAGTCCACAATTTTGGATGATGCTCG
TCATGACATCCGGATACTCTGGATAATTTGGAAAACCGCTGAGCCACAAACAACGAATAAGAACAATGCCATCAGCGCT
GGTCCAACAGGGTATTTGTCTTCAGAGTTTTTCAGAGTTTTGGGGACATTTCCTCTTGTTGTGATGTTTTTACTGTGCT
TTTCGCTAGCAAGTCTCATACGCTGCTTGTTTGCCATGTTAAACTTTATAATTTCAACCACAACTGGCTGAATAAATGA
GATCGGAAGAGCGTCGTGTAGGGAAAGAGTGT
>Contig37 8382 reads, 558 bases
AAAAAAAAAAAAAAAAAATAGGGATAACAGGGTAATAGACGCACCAGTCAGCTCTTCCACAGCATCAGACGCACTAGTC
AGCGCTTCCACAGCATCAGACGCACCAGTCAGCTCTTCCACAGCATCAGACGCACCAGTCAGCTCTTCCACAGCATAAG
ACGAGCCGGTCTTCCAGAGACTCTTCCATCGTTCATTATGATAACCAAGACATACTCCGTCTGCATGCTGTTTGTTGTG
GTTTTATCGGTGTCGCATCCCGGTTACCCTGATCCATTTTGGGCGAACTACTGTGGGCGCTCGGAAGAAGAATGCTTTC
AATTTCCATTTCAACAACCTCCCCACTTCTCTTGCCGACAAATATGTAGAATTAAAGGTTATACGCACGGTCTTTGCTA
CGAAAATGAAGCCCACTGCCTAAGTCATCAGAAGGAAGATGTAGAAGGGAACTTTACCCACGGCTGTAAGTGTTGGCTT
TTCAGAAGCGTGCCTACACCACCCCCACCTTATCATTACAGATTCACGAGCCATTGACGACTGCGCGTGAAGAGCGTCG
TGTAG
>Contig38 10094 reads, 854 bases
TTTTTAAATTAGTGTATCTTTAATCAGTAAAGCAATTTATTTTGTCTTCTTGGACTTCATTTTCCTAGTGTAAAACTCC
AGCTCTTTGCCTTCCAACACATAGCCATCCACCCTACCACACTGACCTGGTCTCGAAGAAATTTTAGCATAAACTCGAC
CGGTAGAAAACTGTTCATCCAATGCAGGTTCTACTTTTGCAATTTTCTTTCTGGCTTCATATTTCTTCTGAGTTTTCTT
AGAGCGAACTTTGTTTAAAACAGCTTCTTCTTCATCAGACAATTTAACGCCCTTCTTGCGACCTAGAGGTGTGGCATAG
TGAGCTTCATACCACTGACGGAAAGGGGTTGAATCTACCTGGACAATGCAACTTTTAACAAGAGTCTTGGTGCGCACAA
ATTCATTGTTTGAAGCATTGTAAACAACATCAATGATACGAGTTTTGCGAGTTACGGCTTCACTACCCCAGGAAAAGTT
GCCATGATCCTGTCGCAAGGCTCTGTACTTTTTGTTACCACCCATGGTACGTACAGTGTGAATCCTTTTTGCTCCAAGC
TTGGTTTGGGCTGGTGGACGACCAAGCTCGAACTTTCGCTTCTTTCTCAAGGCGGCCATGCGGCCACCAGTGGCCCTGC
GCTTGTGCCATTTATCTCTGGAGATACCCATGATGGCGTCTAATAGGGAAAAGATTACCCTGTTATCCCTATTTTTTTT
TTTTTTTTTTAATTTTTAAAATTTATTCAAACATTTTTTKTGCCCACCCAAAAACTGAAATTGGTTGCAATGATAATTT
CTGAGTCARCTGGATACATTTTAGATCGGAAGAGCGTCGTGTAGGGAAAGAGTGTAGATCTCGG
>Contig39 12639 reads, 936 bases
CCCTATTTTTTTTTTTTTTTTTTTGATAAAAATATCGTTTAATTGCTTCAAACCAAATCAGGCCCACATAATAAATCAG
ACAACATCGGTGTAACTTAACAGCTTGTTTCAACCAAAATACTTTTTTTTTTTACTTTTACCCAACAGGAATGAGATCA
CGTGACGGTACAATGAGAACATCGCTACACTGAAAGAAAAATGGTGGGTCGTTGTTGGTCACATACTTGATCTGGACAA
TCATCTGACCAGTAATTGACGGGACTGTGACGTCATCGGAGTAGAGCGCCAGGGAAGGTTCGGACGTGTCTGGAATTCT
GTGAATCTCTTTTAGGGACGCTTCATCGGCACCGATAGAAACAGCGAAGTAACCTGGCGTGACGGAGTTGAAGTGGTCA
AGATTCTTTTGAATGGTTACAGTAAACAGCTTGCCGGCTACAAGAGCTGTTCCTGTGGTCAAATTTTGAGGTCTTCCAC
CACATGGTCCTGTTTTCAGATAGCAGTCACCAGCACCTACGGCATTTATGTTGTTGGACGGTCCTCTTTGCGGTGGAGT
GACCAGGCACATATGGCCATAACATACACTGACCAAACAGCTGACCCAGAGAACTACAATCTTCCACATCGTATACCTG
TAATATACTACCCTGTTATCCCTATTTTTTTTTTTTTTTTTGGTGACGGTGTCAAATTGCATACCAATGAGTTGCACCG
AGCAGTATTCGGCACTTTTACCCGAGTTGGCATCAATAATTTTACCGTAAAAACGGCCTGTTTTGGGTTCATTGCCTCC
AAATCCTCCTCCGCGATTTCCGCCGCCGCCGCCGTTAGGACGTTGGGCGAAAAGAGAAGAGAAGTAAAGAACAAAGAAA
CAGAGAAATAAAATGGGTTTGGATAAGCTAATATTTGTCATATTACCCTGTTATCCCTATTTTTTTT
>Contig40 8591 reads, 666 bases
TTGATCATGAAAAAAAAAAAAAAATAGGGATAACAGGGTAATATTATTGCTTCATCAGCTTGGGTTAACAGGACGAAAG
CTAAAAAAAAAAAACAACAAAAAAAACATGGTGGCTGTCCTCTACGCAATACTTTTCTGCCTGCCAGCCTTGACCTTGT
CTCAGCTGAGCCTCAAGCCGTATGACGTCACGGCTGGATATTTATTTACAGAATCAGACACCAACCACGACGGAGTCTA
TGATAAGAACGAACTGGACGATTTCTTCAAAGATTACGACACCAACAATGATGGCGTGATAACATTCCACGAGTTCAGC
ACAGTCGTCAACTACAACCACGTCCACAATTCGGAGTACAACCACTACCTGCACTCTCTCTACGCCGTGTACGACTTCA
ACAACGACGACGAGGTCAACCATCGCGACTTTGACCAGTTCTTCGCCCTGGCCGACAGCAACGGGGACAACGTGTTGCA
GAAGTCAGAATACGTGCACTACGTCTCTGTTTTATTCACTGCACTTGAAACCGCTTAAAGTAAAGCGTACAAGGAACAT
CAGCTTAAGGCGCAACTACTTGTAACACAGAGTATTGCTTAAGTTCACGAACATTAAATAAAAAATTCAAAATATCAAA
AAAAAAAAAAAAAAATAGGGATAACAGGGTAATA
>Contig41 21101 reads, 864 bases
CAAAAAAACATTTCAAGCAAGTYTTATTACCCTGTTATCCCTATTTTTTTTTTTTTTTTTTGCGGCATCAATTGTTTTT
TATTACAAAATTTAAAATGAGTTAAACATAATAAGCAGTGTTCGTAGGTAAAACTTTCTATTTTTGTGGATGCACCAAT
GAAGACAGTAGCTAAATGGACAAGATTCGCCTCCTGGCATGGGCAGGATTAGCCTGGCTTAGATACGATTAGCCTGTCA
TGGGGATTGTTAGCCTGGCATCACCATCGTCATCATGCCATGGCCGCCAAACACATTGACCCAATAATTGTGAAACTCC
TGCTCTGAGACCAGATTGTCGTTGTTGGCGTCCATCAGGGGGTAGAACTTCTGGTAGTCCGAGACGTCCAGTTGTCCGT
TCCTGTCCACGTCGTACTTGTCGAACATGGGGTCAACGATCATCAGGTGCTCCGGCATGACGATGGTGTTGTGGTCCAT
GTACTCCTTCTTGGTGACAATACCGTCCTTGTTGGCGTCATAAACCGTGAAGCTGTTGATGAACTCGCTCTTGTCCAGA
ACTCCATTGTTGTCTTTGTCTGCCTCCATGAAGACCATGTTGAAGTGGTCGTGGTGGTCACCGGTCAGCTGGCTGTCCA
CCGAGCTTGACCACGACAGCATCACTATCAGAAGCGCTGAGATCAATCGCGTCATTTTTGTTTTCAGATTTCAGTGCTT
GAGTGTTGGTTACAACAAGTAATCCAAAATTTATACGAGTCCAAATAAAATCTTTAGAGTGTCTTCAAATGCGTCAGTG
ATTACACGTTGTTGACCGAAGGAGAATGAGTTCAAGGTCGTCCTAGATTCCCTGGTTGATAAAGTACTTTTTTT
>Contig42 13474 reads, 933 bases
AAAAAAAAAAAAAATAGGGATAACAGGGTAATAGAGTTTGTTGTCTTGCTGCGTCAGTGAACGTACAGACATACCTCAT
AGCGCTGAATTACGCCACAATCGTATTCTACATCCTTCAATTTTGTTCCTTCATCTTTGACGAGATAATATCAACATCT
AAAAAATGTCAGTCAGTCAAGCTCGCCAAAACTACCATGCTGAAAACGAGGCAGGCATAAATCGCCAAATCAACATGGA
GTTGTATGCAAGTTACTGCTACCAGTCAATGGCCTACTACTTTGACCGTGATGATGTTGCACTTCCTGGCTTCCACAAG
TTTTTCAAGCATCAATCCGATGAGGAGAGGGAGCATGCTGAAAAGCTGATGAAGTATCAGAACAAGCGAGGAGGTCGCA
TTGTCCTTCAAGATGTTAAGAAACCTGACCGTGATGAATGGGGCACTGGTCTTGAGGCCATGCAGGTTGCTCTGCAGCT
TGAGAAGAGTGTCAACCAAGCCTTGTTGGATCTGCACAAGCTTTGCACCAGTCATGATGATCCCCAGATGGCAGATTTC
TTGGAGTCTGAGTTCCTTGAGGAGCAGGTCAAGTCCATTAAGGAACTAAGTGACTACATCACTAACCTGAAACGTGTTG
GACCTGGGCTCGGAGAGTACATCTTTGACAAGGAGACCCTAAGCAGCAGTTAAAAATCCACTGCCCGACTGTTAGCAGG
CTTGAAGTACTAGCCATGCTTGTTTTGTCCTATGCCCTAATTTCAGAAAAATTACTTTTTTGTTGTTGAAATATTCTTG
TTTAAAAGGAATCTCTTGTCATCAAAATTTTTGTTGTAAATTGTTAGTGTGAAAAATTAAAAGGGCACATTAATAAAAA
AAAAAAAAAAAAATAGGGATAACAGGGAAATCTCCTTCGTTGTGTTTTATCTGTACTAACTTGC
>Contig43 6296 reads, 499 bases
GTTAAATTAAAAAGCAATAAATATAAATGAAATGATAAAAAAAAAAAAAAAAAATAGGGATAACAGGGTAATCTTTTTT
TATTCGCTCATCACAAACATTAAACATGCCTTTGGCAAAAGATCTTTTACATCCCTCTCTGGAGGAAGAGAAACGCAAA
TGCAAGCTGAAGCGTCTTGTGCAGAGCCCTAACAGTTATTTTATGGATGTTAAATGTCCTGGTTGCTACAAAATAACAA
CAGTTTTCTCCCATGCTCAGACAGTAGTCTTGTGTGTTGGATGCTCGACAGTTTTATGCCAGCCAACAGGAGGCAAGGC
CAGGCTTACAGAAGGTTGTTCCTTCAGGAAGAAGCAGCACTAAAAGAATGTATTCTTGTTGCTTTTATTTTTCTTTTAA
AAATGGTGATTAAACCAAATTTAATTTATGAAAAAAAAAAAAAAAAATAGGGATAACAGGGTAATAWGCTTCATCTGTT
TACTTCTGCTNGGAATGGTCCTCAG
>Contig44 3066 reads, 343 bases
AAAAAAAAAAAAATAGGGATAACAGGGTAATCACAAACAATCTGACTTTTAAAGAAAATTCATCACAGCGCAACTTGCT
AGCAATCATCATAGAAAATGGGAAAGTTCCTAGCCTTGATTTTGATTACACTGTGTGTACTGGAAGCGCAATGTTGGTA
TATGCCTAAACCCGTAGAAATTGCGTGTGCTGAGTGGTTGAAGGAAAAGACAAAATTTGAATGTTCCGACGCTAAGGAC
AACGACACTGTATGCAAGTACATACTAAGTGCGCTCGTTTTTTTGAGATGCAATTGATGAGACCTGACCGAAACGGAAG
AGCGTCGTGTAGGGAAAGAGTGTAGAT
>Contig45 12771 reads, 642 bases
TGGGTAATAAGCACACATTGATTGTTGCAGACCMAAAAAAAAAAAAAAAAAATAGGGATAACAGGGTAATTAATAATCT
GTTTGAACAAGGATAACGCCATGATCAGATCAGTTGCTGTTTGCCTTCTTGTCTTTGTCTCAGCTGAAGTTGTTGCATG
GGTCGGACAGACGTGCTACCACAATAGCGAGTGCGACTTTAGCGAGTGTTGCCAGAAATTAGGTCACGACGATTTTAGT
GCATGGCTAGAAGTAAGACAAGGAACCTGTGCAAGTTACACGGCAGATGGGGACAATTGCGACGATTTCGACGGGATGA
ACGGACACTGCGGTTGTGCACACGGCGCCATCTGTTATCCCTACCGGAGAGACCCAAAGTACATGTGGGAATATAGATG
TGTGAGGACATGGGGCTAACTGTCCGAGAGCCGTTACAAGTCAGTGACATGACCCGTGAGAGGGAACTTCCAAAGTTAA
AAAAACAAAACAAAAAATTAGTTGAATTAAAGCTATAATTTTAAAAAGAAATGTTAAAAACAAAACTAACATAAACAAT
TTGTGTAAATTTAAAATTTTCGACAAATTTGAACATTGAAAAATTTGGCAGAAAAAAAAAAAAAAAAAAAAAAAATAGG
GATAACAGGG
>Contig46 10356 reads, 773 bases
CCCTGTTATCCCTATTTTTTTTTTTTTTTTTTCATCGTTCCATCAGTTTAATTATCCTTTACGTTATTACAACACAAAC
TCTGGGAACTCAAATGTAACATCTTTGCCAGTAAGTTTCTTATACACTGAGGTAAATGTATCCAGCTTATGTTCCACAT
TATTTTGCTGACTTTTATCAAGTTGGACCTTAATAATTTTAGAACCATCCAACTTAACACGAACTCGCTTGCCAAAAAT
TTCAGCCGGATAACACAGATCCTCAAGAATAGAATCATGAACTGCAGTAAGAGTGCGACTCCTTGGTCTCTTTTGCTTA
TTCTTTCTCTTGCTCTTTCTAGTTGGTTTTGGCAAAATTCTTCTCTGTGCAATGAAAACAACAGGCTTGCCGTTAAACT
TCTTTTCAAGCTCACGAACTAGACGAGTTTGAATCTTTTGGTAAGCTTTTAATTGAGGCACAGGAACAAAGATGATGAT
TGCTTTTTTGCCCTGCACATCAATTTCCTTGGCTCCCGTGATTGAGAGTTCATACAGTGAAGCTTTTAAATCTGAGTTC
ATCTCAAGTTCCAGGAGAGCCTGGCTAATGGATGATTCAAATTCATCTGGCTTCTCGCCCTGAGGCTTGATAATCTTGG
CACTCGCCGAATACATCTTAAAGGCGACCGTCTACCGGAAAAAAGGATTACCCTGTTATCCCTATTTTTTTTTTTTTTT
TTTTTTTCCCTGTTATCCCTAGCCTATAGTGAGTCGTATTACAATTGGCTAGGGAGGGGTGG
>Contig47 12184 reads, 474 bases
CTGTTATCCCTATTTTTTTTTTTTTTTTTTCAACAAAAGCGTAGTTCATGTTTAATGTATTCTGAAATTATTTTCTGCT
TTGGTTGTGGCTTAATTTTATTGTCGTTTGAAATGTCTTCCACAAATCAAATGGGTACACAGAGATACGTTGCTCTGCA
AGGATATCCGGTCATGCAAGTGGAATGAATAGTCATACAGTACTGGTCGCTAGGACAACCGCCGCACAGCCTATTGGGA
TCTTCGATGGCTGGCGTTGTGGTGATCGTCTCGCTGGTGACGGGTTCATCACACTGACGCACGGGATTGGCGTCTGCTG
TGAGCAACAAGGTCAAAACCATTACATAGAGAAAGAGTAACACCTTCATTTTTACGTACAGTTGACTGAGTGATTTGTA
ATGTCAAAAATATATTACCCTGTTATCCCTATTTTTTTTTTTTTTTTTTTATTACCCTGTTATCCCTATTTTTTTTTTT
>Contig48 12039 reads, 558 bases
GTTATCCCTATTTTTTTTTTTTTTTTTTAATGTCGATGATATTTTATTTGATAGAACTGTAAAAAATGTACTACAAGGT
CAGCTGTTACAGGGTCAGGCTGTGGAAGAAGTTGTAAAACTCCAGCTCGTTGACTAAACTGTTGGCGTTGACGTCAGCA
GAGGAGAAGAGTCTGTCGTAGTCAACGAAGTCTAGATGGTTGTCATTGTTGAAGTCCAGTCTGCCGAAGACGCTGTGGA
GAATGCGCTGCCACTCTGGGTTATCGCCGTACTGAGCATCTATGACTGTGACGTACTCTTGTTGGGAGACTCTAGAATC
CCCATTACGGTCAAAGGTCTTAAAATAATTTCCAACTTCAGGTTTTTCAATATGGGCATCATTGTCAAGATCCATTTTG
ACAAAGAGTGCGTCAGCTATTGTTCTTATTTCATTTTGACACAAAGCCACCGCCAGGAGGCACGGCAGAATAGCGAATA
GGTAAGACATCGTGATAAGTCAATAAACCTGAACAGCCTTGTTACACCACAATAAAATGTATTACCCGAAGAGCGGTTC
AGCAG
>Contig49 18510 reads, 1214 bases
TCGAAGATAAGTTGTCTTGTTTCGAGAGTTTGAATAAATTTAACAAATTTTCAATAAAAGTTTAGTTAAAATTGGTTGA
GACAAATCATTTTTGTTTTCAGTCAGACAGAAGTTTCTTTGCAATTTTTCTTTGCAATGTTTCTTTCCAATGTTTCTTT
CCAATGTTTCTTTCCATGTTTCTTTGGAATGTTTCTTTTCTTCCGATAGTTAGGCGCCAACGTTTCTCAATATTCATAG
TGTAACTTGACATTTTTTGACTGCTACTCTACTTCGTTTGGGTCCACACACAGTTAGCACGAGTAGAAGCCTGTACATG
AGCACGAATTCTGTTGAGAAAATCTTCCGCCACATAAGTTTGGCTACACGTTGCATTACTTAAGAACCTTTGGCTTGCA
CAATTACCGATACGTTTATAGAGGAGACAGAGCGGATTATCCTCCACAACGGCGAAGTCTGCAAGCGGGATCCCTAACG
TACAATTCAGCCAGATCCACGAAAATGTACAGTGGTTCTGTGCCTCTATCTGTGCAAATCTATCTGCTTCTACAGAGCT
GCTCGCTCTCAAAGAAACGCCAACAATCAGGATTGTCACGAATTTAAGCATCGTCTTCCGATATAGATGATTTCTCGGG
ACCTTCCCACAGCTCTGGTCAATCGGAATATGATCAAGGCAGTCTGTTCCTACAGCAGCTCTGGTCAGTTGGTATATAT
TACCCTGTTATCCCTATTTTTTTTTTTTTTTTTGTGATTTTCAGTTTTATTTGGAAATTCTCCTGCATGTATGCATAAC
GAAAAACTTCATTTTCAAAGAAGACATCTAAAATTAGGGATGAAATCTAGACAGCAACGAAAATCGAGTCGTAGGACGC
CGGTTCCAGCACTTGCATCGCCAGACGTCAATTTCGCGGTGGTCAGTGCATAACGACGGGTTATGAATGCAGTCTCCAT
TGTAAAATCCCATATCCTCACACAAACGATTACAAGGCAATTCTTGGGTTTCGTCGTATGAATCATTAAACGACATGCA
CCACCAGTAATACGGCCTACAGTCATCAACATAAAACGGGTCAGAATAAAAGTAGCTCAGACCCACATCAGCAAAGAAG
AGGATCAAAAAGATCCTCATGATATTTATTATCATCTCCACGGCTTAGGTTGGGTTTCTATTACCCTGTTATCCCTATT
TTTTTTTTTTTTTTTTTWTWTTTTTTTTT
>Contig50 20732 reads, 811 bases
CGACGCTCTTCCGATYTYTTWTTTGTTAGGTAATAATTATAAGTTTATTTTTCTTTTTAAATTTAGACAAAATTTATGT
ATTCATAAATGATCATAACCTTGTCTAAATCATTTTAATGTGTGACTTGCGATTTTTCACCAAACTGTTTCGATAATAC
TGATATTTTTTTAGTTGTTGGTAAAATTGACTTTTATGATATAAAACTACGTTCGTCCATAAATATTGTTTAAATAACA
GCAATAATGCCACGCTATGGAGTCCTGTTTTGTTCTGAGTTTAGACTCTGGTGAGTATCTGTGTGAGCTCAGCATCCCC
AAGTTTGGTTACTGCTGTCATGACGTCACCCTCCACTGTCCTGGTGACTGTCCAGGTCAAGGACTTCTCGGCGTAGACG
TATGTCTCAACTGATTTGCCATCTGCCACTGACAGGGTCAATTTTGCGGTGTAGCCATCAATAGACTTGTAATCGACTT
CTTCTCCAAGCTTCAGTTCGTATGTTGCGTTTGGTACTTTTCCCTTGAAGTCGATTACGATTTTGTAAGTTTCACCATC
TAAGCTGATTGTGAACGAGTACTGAAGCTCCTTGTATTTCTGGATTTTTTCTTCGGAAAAGCCCATGACCTTGCCGAAA
TCCTCCAGCCCTGTTGTCTTGGAGTTGTCAACTTCCCATGTGCCAAAGAATCCTGAGTCCATTTTGGGTCTGAGAGTTG
CGGTCTTAGGAAAGACAAAATCAGAAAGTCAGTAAAGCCTGGATGTAAGGTGGATTACCCTGTTATCCCTATTTTTTTT
TKATCGGAAGAGCGGTTCAGC
>Contig51 6335 reads, 722 bases
GGGTAATACACGTTATCTGATTTCTGAACTGAGAAAGTAGGCCACCTGTGCTGGCTTCTTGATTGTCTTAATAATAATA
ATACGTTTCAAAAAAGTAAAATACACAATTTTGCATTTATATCTTGGAATATTTGCTTTTTGGGTAATGCAACTTGTTT
TCTCCAATCACTAGACGTTGTCTCAAGCTTGAACAGCTTGCCATTTTGTTTAACAACAGTTGGGACGAAATGCACCCGG
AGATGAATTTATTCTTGCTCTTAACGATTGCAGTAATGCTCATAGGAATAACTCAAGGCCTTCTTATAGATCTACTGCA
GCCTACCAACTGCCCGTTTTGTGATATGGACTTCGACTGTTTAACCAACTGTCTCTTCCCCATCCTCAAGCGCCAAGAC
TGATACGACTCATTTGGAGAACTGACCTATAGATATGGCCCCTTGAGATGGAATGTATGCCTCCATTAAAAAAAAAAAT
GACTTTATAGATCTAATTCATGTGGATGTTTTTCGTTTGATGAAAATAAAAAGTAATATATCAAAAAAAAAAAAAAAAA
TAGGGATAACAGGGTAATATTCGTACTTGAGACACGGCCTGGCCTCGCAGTGGATTAAAACTGAATACAAAATAACAAA
AAATCCAGGAGTCGCTGGCTCGACAATTGCCGTCTTATCAGTTCCCTTGGATATATTTCTCCACTGCAGTTGCAGGGAA
CACCGTGGAGA
>Contig52 12876 reads, 682 bases
ATTTTTTTATTATTAATATTCATCGTTTTATTATAGACGTTCAAAAAAAAAAAAAAAAAATAGGGATAACAGGGTAATG
TGTTAGTCTCTAGATAACTAGCTGACGGCAGCTCTCTCCATTCGTCTTCAGCACGAGCTAAAACATCACTGTTAAAACA
TCACTGTTAAAACATCACTGTTAAAACATCATTGTTAAAACACCATCGTAAGAACACCATCATCAGAACACCATCGTCA
GAACACCATGTCTCGGTGTCTTCTTGTACTCACAGCACTGACGCTCCTGGTCGTACTGTCCACACAAGCAAACAACCTG
CCCCAGTACACCAGCATCGCCAGCTGTGACGAAGTTTGTCCAAGAAACAAAGATGTCGTCTGCAAGTTGGACTGTCTTA
GCGTGTCTGCCGACGGTAAATCTGGCACGGACTGTGTCAATCATTTCTACGACACGGACGGCAACATCTACTGGTGCTG
GCTCTAGGGGGTCATTCTGGTCATCTGGGCAGTTAGGACGTTTACCTGGCCACCAGTTAGGACGTTTACCTGGCCACCA
ACATCTTATGTCCGTGAATTAAGTCCAAACATCTTCAGCTATCGTAAATCAAGGTTCTCTAAGAACGTTGATGTATCAG
AAACATTTGTTTCAAACAGATCGGAAGAGCGTCGTGTAGGGAAAGAGTGT
>Contig53 6263 reads, 451 bases
TGCATTTTATGTAAAAAAAAAAAAAAAAAAATAGGGATAACAGGGTAATAACAGTTCAGACATCTAGTGCCACCGAGAA
AGACAAGACGTATCGTTTGGAAAATCAAACAACCTGAGAATGAATATTATTTTTGTAGTCGCCATTTTGTTGGCCTTGA
TTTCCGTGGTCCTCAGTCTGATGTTACCTTGTCCCCCAGAATGTGACTGTGGCCCCGGTCTGCAGTGCGCCATCGGTAA
CAACATCTGCGGTTTTTATTGTACAAGTGGGTAGCTGGTTTTATCAATAACGTCCAGAGTATCACCGACAAGAGTGTCT
CAAGATTTGTGCAGAGATGAGCTTCAAGAGAATTGATTGTGTTCATTAAATATTAGTTTGGCTATTATACAGCAGAAAA
CTTTTGAATAAACAGTAAAGAAACAAAAAAAAAAAAAAAAAATAGGGATAACAGGG
>Contig54 7004 reads, 675 bases
AAGACAATCTTGGAACCCATGTCATGATCTGTTTTCTGCAGACACAACACAGAAGTCAAATAAATGAAAATTCCTATTT
TCCTGTTATCCCTATTTTTTTTTTTTTTTTTTTTACATCAACTTTTCAGTTTATTTTAAAAACCCTTATTACGCAGCAT
CTGCAATGGTTACCTCAACCTCCACTCCAGGCTCAATGCTGATTGAAGTAATCTGTTTCACAATTTCAGATGGGCTGTG
CAAGTCAATAATACGTTTGTGAATTCTCATTTGGTATCTGTCCCAGGTCTTGGAGCCTTCACCACAAGGTGTTTTGCGA
GTGGTAATGCGCAGAATTTTGGTTGGCATGCGTACAGGTCCTTTGACTTTCAGATTCTTTTCTTTTGCTCCTTTGATAA
GATCAGCACACACCTTTTCCAGGCTTTTCACAACACGGCTAGTGAGAGTGATGCGGATACGGTGAATGGGAGCTTCATC
CCCTGCTGTTTTCAATGAGCTGTCTTTTGTAGTATAGTTTTGATCTTTTAAAGTAGAAGCCATTTTGTATTGATCTAGC
CGACTTATTCAAAGTAAATTAAATGATTCTTTGAACAGCGGTGAGCCAGCGACTTATTCCCAACACACGAGGGGAGAAA
AAGGATTACCCTACCCTGTTATCCCTATTTTTTTTTTTTTTTT
>Contig55 8580 reads, 714 bases
GTTTTGATCATGTCTTTTTAACGAACTCAGTTTTAAAATTCATCTAAAAAACTTCTAAATTAAATTGGGTCATGTGTAT
GATCGTTTTCTCATTTTATTTTAAACCCTAATATTTCTTGAAATACATGTAAGCCCACTCTCGTCAAACTCTATCCATT
CAAGGCTATACGACACAAAAACTTCTGTTAGCTTTGAAAAAAGCCAGCCGTTACTTTCTGCTTATTTGTACAAGGGGGG
ATTGCGTATAAGTATAAGGGGTTGCGGCACAAACAACTCTTCCTCGTTGTCATCTGATACTACAATAATGACATCATCT
CTCTTTTGGTCACCTTTGGGTGATGACAAGTCCAGATGACGTCGTCCTAGCTCATGCGACTTAAGGACGTCCAATAATG
CGTCCTTGGTTAGCTCCGTAGGGACGTCAGCTCGTCTGTCCTGGTCGAAAGCGTCAGCGAGTCGTTCTTCCGGGTCATA
GGTTAAAGAAGGGCTCATGCACGCGGATAAAACTGTTAATAAAACCACAGCCCATGTGATATTTGATGACGTCATTGTT
CAAATGGAAAAGCTACTTTCTTTACTGGATTCAATCTGGTTGTTTCTCCTTGTGCTAAGATCAAACAAGCGTCGAATTT
CAATTTTTGCCCTCACACAATTTAAGTTGCCAGGTGTTGGAGTCTATTACCCTGTTATCCCTATTTTTTTTTTTTTTTT
TTT
>Contig56 9975 reads, 1639 bases
GGGTAATGTTTTATTATTTCAAAGAAATTAACACAATGGAAAGGTTTGTTTCGTCTCTGGGAGCCTGCCTGTTACTTCT
TGTTTTCATTCAGGGTTCCAGAGCTGGTGGTTATTTCGAGGTTGAATTCCTTCGCTATGAGGATGATTGCTCAGAAATT
GGTGGCTACTGTGACGCCTTGTTCTATTTTAAACTCGGCACACCAAGTTGTGAGTCTTGCTATGCCTCTGCGAGCCCAA
ACAAAGACAAGTATTTCGATGCCAACGTAATCTCATTGCAGGCTCTATCGAGCATTCAAGGACTGCCAAACCCTTGGCG
AGTTTCAGTATCAAGTTTTGAAAGCTATGTACGGTTGACCGTTCAAGTTATGGATTCGGATTATGGTAGCGAAGAGCTC
ATGGTTACCTTTGTTGATGAGCTATCCACTTCAGCGGGGCATTCAACACAGTGGTTGCAGAAGACAACGTCCAGAGTCC
AAGATGAATATCACTATGAACTTCAATATAGGTACAGAATAACTTGTGATGCTAATTACTACACATCTCATTGCGACCA
ATATTGTGTACCGACCAACTCCTCTCATGGACATTACACATGTAACACCTACAGTGGAAGCAAGATTTGCTTGAAAGGC
TGGACTGGGGCCAATTGTGATGTTGATATAAATGAGTGCTTGCAAGGGTTCTGCTCTCATGGCGTCTGTAAAAATACAC
CAGGGAGTGCCGAGTGTCAATGCGATAGTTATCACACAGGTTCAGACTGTTCTGTGTTGCTAAATCGGTGTCCGTCTGA
GACTTGTCGTAATGGTGGAACCTGCTCCACGCGCCCAACCTCACCTTTTTATTCGTGTGCATGCGTACACGGCTGGACT
GGTGCGAACTGTGAGACTATAGTAGACCCTTGTATGTCACACCCGTGTTTAAACAACGGGATTTGTGTTAACAATCCAA
CTGATGCGACTTATGCTTGTTCGTGCACATCGCACTGGCAAGGGGTGCATTGTGAGGCAAAGGCTGATCCATGTATGTC
CCACCCATGCTTAAACAACGGGGCATGTTTCAACCACCCAACGGAGGAGAGGCACGTATGTGTGTGCACAGCAGACTGG
CAGGGGGATAATTGTGAGACAAGTGTTGACGCTTGCTCGAACATAGTTTGTTTAAATAGTGGGACGTGTGTCGTGTACC
CAGCACTGCAGACAACGAAGTGCATTTGCAGCCCAGGTTGGCAAGGCGATGACTGTGGTTCAAGAATCAATCCATGCAC
TAACCTGCCATGTCAAAACGGAGGAACCTGTATTGCTGAGGCAGACTACTCAGCATATACTTGTGCATGTCATGAAGCT
TTTAGCGGCGCTCATTGCCAGGATAGTCATGTTTCAACAATTCCAGTCGTTGTGGGCTAAGCAGATTTTGTCTTCGTCC
AAAGTCGCCATCAAGCATAGGAAACAAGAAGCAACTTCAACACAATCAGTCGTGGCAATTAAATTGTATGTGTTATGTG
CACAAGTTCTGTAGACGTTTATTAAACATTTTGTGGTTGAAAATATACATTAAACATTTCGGTTAAAAGCAAAATGTCA
TTAAACTTTACAATGATTCCAAAAAAAAAAAAAAAAAATAGGGATAACAGGGTAATAAG
>Contig57 6238 reads, 687 bases
GGGTAATGTGAGCTTAGGGTAATGTCTTTTATATTTGTATCCCGTGTTCGTTGAAAGCAAATCGTTTCACACATAAAAA
GTGAGGTGGGGAGAGTTGTCTTGAGGGCGAACGTTGAAGTTTAAACAAGAGTTGTGTGTTACCTCGAGCTCCAATCAGC
ATGAAGTCGATTATTTTGTCAGTAGTCGTCGTGGCAGCCGTTCTGTTTCTGGCACGAGCAGACGATGGGGACTGCATCC
GAGAGTGTAATACTTTTTGTGATAAAAAGGAATCGTGCTCGCTTATAAATGGAATGGAGGCAGGACCAGACTGTTCTCA
GCCCAAAACGTGTTGGAAAAACTGCATTCAAAGATGCCCTATAATCGATGAGTGCATAAACCAAAAATGTCAATCTGAG
AGACTCAATTGCCAGGCGGCAGAAGCCGAGTGCGACGGCCTCAAGACACAATGCATTCAAACATGTAAAGAAAACAATC
CTATCCATACCAAGAAATAGGTGTTCAAATAAAGCATTGAGCTTGTGGAAAGTGTTGGGAGTAGGCAGAAAAATAAGAA
TTGTTTCATGCTAATATTCATTCAAAATTCAATGTGTGCTTACTTTTATTTATTTTATTTTTTTGAAAACGAAGGAAGG
TGTAAAAGAATTTCATTAGTTCAATATTAAAATGATGCCAATTTTGAGAAAAAAA
>Contig58 17586 reads, 683 bases
AAAAAAAAAAAAAAAAAAAAAAAAAAAAAAAAAAAAATAGGGATAACAGGGTAATCCTTTTTCTCTTCAACTTTGCCGT
GTGGTGGACGGGCAAAACTTTTGTGAACCAAAATGACGAATCCTAAAGGTTATCGCCGTGGTACACGGTACATGTTCTC
ACGTAAATTCAGAACGAAAGGTGTCACCAAGCTATCTCGTTATATGTCAGTTTACAAACGTGGAGACATAGTTGACATT
AAGGGTGATGGTGCTATTCAAAAAGGTATGCCACACAAGTTTTATCACGGAAAGACTGGTCGTGTTTTTAATGTTACCC
CTCATGCTGTTGGAGTTGAAGTAAATAAACAACTTGGCAATCGCATCATCCCCAAGAAGATCAATGTAAGGATTGAGCA
CATTAAGCACAGCAACTGCAGGCTTGACTTCTTGAAACGTGTCAAGAGAAATGAAGCACTAAAGAAACTGGCCAAGGAG
AAGGGTATTCCAGCCCTTACTAAGAGAGTGCCTGCCCAACCCAGGAAAGCCCATTTTGTCAGCACCAAACTTGTCAAGC
CAGAGTTCCTCACACCAATTCCTTATGAGATCATTGCTTAAATGCTGAATAAATTACACAACTATTTGTGAAAAAAAAA
AAAAAAAAAAAAAAAAAAAAAATAGGGATAACAGGGCGGTTTTTACCTGTA
>Contig59 9597 reads, 756 bases
TACACTCTTTCCCTACACGACGCTCTATTTGTCCTTTTCCTCTGCCTCCTTCTTCTTCTTTTCTCTGACACCAACCAAC
TTGGCTGTAATTCTGGCTTGACGTAGGGCAACAAAGGCGTTATGTTTACGCTCATCATCTGAAGGCTTTCTGGCTTTCT
CAGCTTTGAATGTTCTTGGGATTGGTAGAATAACTGTGCCTGTGAGTTGTTTCACCAGTTTCAACTCTTCAGGAGAAGC
ATCTCCCTTTCTAGGTTTGCCCTCTTTGCGGGGGAAAACAACCAATTTGGATTTGTACTCCTTCAATCTTTGGACATTC
TGAAGCTGAGACTCAACAGACAGATTACGTCTCCTGAAGTCAACAGCGATGCCAATAGTGCGTGCAGTTTTCTTATTGA
CACCTGCAGCTTTAAGTTCATCCAGTGTGAAACCACGTCCTAGTCTGAGCTTTGAGTTGTATTTGAAAGTTGGACAGCG
TACAATGGGTCTCAGAAGACCAGCTACAGGTCTTGGAGCAATAGCAGCAGCCTTGGCAGCACGGGCAGCCCTTCTGCGT
TTTTTTCTCATTGGCTGGTTAAACCAAGTTTTAACCATACTTTGCCAATCCTTATGGAAATGGCCATTGGGAACTATGT
TATTTCTCTTAGGAGCCATGTTTTAGAGGCTCTCAACAATATAGAAACCGGAAAAAAGATTACCCTGTTATCCCTATTT
TTTTTTTTTTTTTTTTTTTTTTTCCCTTTTTTTTTTTTTTTTTTT
>Contig60 12884 reads, 490 bases
CCCCTATTBTTTTTTTTTTTTCTTTGAAATAATTATTTTTATTTTCTTTAATTGAGTAAAATCTTTATCTTGTCCAGGG
ATTTCATCGTATTTATCGCCTCTTACCTCAAATCGTATTTGATTACTGCCACTTGTGGATTGGTTTTCAAAACCGCCAC
GGATAATGAGGTCTAACTTCCCACGGTCTGCGGTCTCGCCATGGCAATCGACCTGTCAACAATAGCCTTTTCACTAAGT
CCTTCTTGGAGATGACACTCCTGTCTCCAAAATCATCGAACCTATTGATGGCGTCCCTTGTATCAAGGCCATTAGATCT
CTTAGACACAACAACCGGCCACCTCCAAGGATTATAGCCGGACCAGATTCCTAAGACACACGTCACGTGACCCAAGGCT
AGGAGTGTGAGCATCAATTTCCACATTGTGAGGATCCGAACCCTGACGGCGTGAACTCTAGATGGACTGTTCTGTTACC
CTGTTATCCGAAGAGC
>Contig61 9099 reads, 763 bases
TGCATCATCACACTTCAAACAAAATGTTTTAAGAATTAAAATATTTCATTTTTAAAAGTCCACTTGCGTGTAATGTTAT
TTGTTTCATATCATCTCAGTTATAAATAACGAACAAATCTCTTTCTTGTGTTCGCATATTTCATTTATAGTAAAATTTA
ATGGAATGGACTGTAGTAAATAAATATTTCTCAAACCATTTAGCAGTATAAGTATAAAAACATTTTCAACAACAAACTA
AATCATTGTACAAGGTCATCACTCTTGTTTGCTCTGTTTCTTTCTGACTATATTGACAGGTCCTACATTATCTCCGGTA
CATGTGTTATGGTCCTTGTGTAAGCCGTCACAGTAAGGCCACTTTTTGGATCTCCAGCATCTGCACAAACTTATTTTCT
CCCCTGGTTGAAGTGTCTTCATCAAATCTTCAATGTCGAATACATCGCCAACTTTCTTTTCATCTTTCCTAATTGACGG
GTTGATAGGCCTGTCCCACCTTGGAACGCGACATCTGTACCGATAGACAATGTAGGAAACGAACCCAATGCCAGCTATC
GCTGACACGGAGTAGACCAAATTTTGTCTGATGGAATCTGTCATTTTCGTGATGTCAACCGCTAATTATTGTCCGTTGG
GAGCGACAGTAATGCAGTTGATTGTGTGATTGTCCGTAATTTTGTGCTGCGTCAGTGGGTCCAAGCTGTGAGGATAATT
CATTTACTATTACCCTGTTATCCCTATTTTTTTTAGATCGGAAGAGCGGTTC
>Contig62 6259 reads, 483 bases
TTTTTTTTTTTTTTTCGCAACTTTCGTATAACTGTAATTTATTAGGTTTTAAATGCATTGTACAAAATAAATGGATGGC
ATATATCTTAATGTAGACATGTTGCTGACATATTTCACATAATCAAAATTTCAAAGCTTCTTTCACTGCACCAGATTCA
TTGGAGACATCTTTCACAAAAACAAGACACATTTACAGCATATCTTTCTCTCTATCATTTCTGGTCTCCCCCTTTCCTC
TGTCCGATCTTGTAACCGACTACAAACGAGACAATGGCCGCTGCCGCCGTGGCGAGGACGAGTGTGGTAGTTGTGTAGC
TGCCTTCTAAAGCCATGCTGGACTCGTGTGAAATGAGAGCTTGTCAAAACGGGATTGATGAATGCTTCCTACGACACAA
ACCTCTGCCCGAATCTCTTGTCCAAACTGATCTACCCDGTTATCCGGATTACCCTGTTATCCCTATTTTTTTTTTTTTT
TTTTKGTTA
>Contig63 6979 reads, 667 bases
YCCTGTTATCCCTATTTTTTTTTTTTTTTTTTTAATCTAAAAAGTTTGTTTTATTGGCTTTTAAGAAAATTAATTGTTT
CTTTAGTTAAAGAGACTTTAATGAAAACAAGAATACGATTTTTGAACGTTACAGGCATACGTCTGAGAGATCCTCGTTT
ATTGAAGCTCTTGAAGTTTACATGATTGCTGACTCTGGCGTGCTGTCGACTGGATCCTCAAATGTTGGTTGTGGACCAG
GGCAGCTCGGACAGCAGTCTCCGTAAACTGTTTCCGGCTCTACACCATCCTCACACTGGACGGGTGGACAATCGATGTC
ACACTTGACTCTTCTGGACTTCAGACATTCACATTTCAGGCATCCACCAAGTTCAAACTTGTCTCCCAGCTTGTACTCT
TGCCCCAAGTAGAAACAGTATGCCTCTAGCCCTAGTACTAGTCCACAGCTAATCATTAAGAAAATAGCTGCCCTCGCCA
TGGTTTAAGCTGGGATGTTTCAATACGCCGCGAGTGAAGAGTTAGCACCACCTGTGTCAGTAGTAAGGTCACCTACAAC
GTACGGTTCAGACAATGCTCCAAAACCGGGGATGACAGTGTTATTACCCTGTTATCCCTATTTTTTTTTTTTTTTTTTC
CCTTTTTTCCCTTTTTTTTTTTTTTTTTTTTTTTT
>Contig64 9324 reads, 705 bases
AAATAACGTTGCCTGAGTTCTTACCTAACACGAACAATGAAAAAGAAAACATCGGCTTCGCTTTCAACGTTAATCAGCA
AAACATTTTTTTTTAAATTAAAAAAAATTATTTAGTAAAAGAAAAGGAAAAAAAACAGATCTCAACGACAAAAATTAAA
TCAAATATTCATCTCAACATAGAATAACATGTGAATGCCACGTTTCGTCACAATATAATTTATAATGAAACGAGTGTTA
TTTTCTGTCGTTTCCTAGACGACCCACGGCAGGTAACTCTTCGCATCTACGTTGGAGAAGTTGGCCGACAGTCAGATGG
TTCCGTGCTCACTTCGGTCATAACTCCTACTTTCCAATAAATGGAAAATCAGTGTTAGGACAACATTCCGAAACCTCTC
CGGGTAGACATGGCCACCACACAGTACAAGGAGGGTCTCTTCTCCAAAGGTTTCTGGTCTCTCTCAAATATTTGGCTTG
GGTGAGCACCACCAGCGCTGAGAGGGCTAGTGACACACAGAGGGTTAACCACTGGAGATACGTCCTCATGGTGGCCGAA
GTGCAGTATGCAGTTAAGTCAAACTCGGAGGCAGATGGTTCACACAATGTATCTCAAGCGTTGTGACAAGAACACTAGA
GAAGTTGTCGAATAGAAAAACACGATAGGAAAACAAAAACCGTTTATCTCTAAACTAAGATTTTTTTTWTTAC
>Contig65 12272 reads, 650 bases
AAAAAAAAAAAAAAAAAATAGGGATAACAGGGTAATGCATTTTCCCACCAGTGTCCAGTCATTGCAAACAAAAAAAAAC
AGAAAGATGGCCTACTTGTTCATGGTGCTGCTGAGTGTGTTGGCCTTCACCACCAGTGAGGTCCTTGACTTCAATGTAC
TTGAAGTCAACACATTCACCAATCTCGACATCGACATAAACGGACACATAGAACGTTTCGAAGTCAATGAATTTTTAAA
GACCATTGACAGTGACTACGATGGTAAACTCTCCGAGGCCGAATACGTCAGGGCTCTCGGCCTCCTCCACAGCACCGAT
GCTGTAGCCCTGCAGGTCCTCAGGAACTTCTACAACCACCTGAACTACGACAAGAACAGCTACCTTGATGACGTCGATT
TCGACCGACTCTTCACGTCGTCTGACCTCGATGAAAACGGGCTTATCTCCCCGTTGGAATTCAGCAAATTCTTTTTGGA
CAACATTTGGTATGTCAGAAATCACACAACTATAGCAGGCTAAGACGGTTTCGCCCTTTCCAAATACAATTCTAAATGC
TAAATGTATAGACATTTAAAGCACAAAATGTGTATGACAATAAACAAAACATGAAAAACTAAAAAAAAAATCGGAAGAG
CGTCGTGTAGGGAAAGAG
>Contig66 8043 reads, 499 bases
TGGTTTTAAACTGAACGGTGCATTGGATCTGGAAAAAAAAAAAAAAAAAATAGGGATAACAGGGTAATACAGTTTTGTT
TTGTTTATCTCTTGAATTAAGTAACTAATTAAATTAAATAATCGGTCTGGTTGTCTAGCACAGATCCACGCCGTATTTG
TAACAACATGAAGCTTCTGGGAATGTGGTGTGTCTTAGCGTTGGTGTTGTCTGTAACTTTGGTCCAAGGAAGGTCTGTG
GCTACCACAGTCTACCGCCCGACCAGAGACTGTGTGACTGGGGTCTTGTGTTTTGTTGACCCGTGTCAAACTATTGACT
GTGGCGGGACCTGCGAAGTGGACTGCAACTGCCGGGCATCGTGTCAATTCTATAGCTAAAAGCTGAGAACAGAATCACT
CCGAAAACTAAGACAGTACGCTTTAAAATAGATCAGTAAATTTATTACTCAAAAAAAAAAAAAAAAATAGGGATAACAG
GGTAATAAATGTGCACCAGGGTCCC
>Contig67 7970 reads, 535 bases
TAACAGGGTCTTCTTGGGTAATTCCTTTTTCCGGTTGTATCGCCTATAGTAATCATGGCTGATATTGCCACTATTAGAA
CTCGAAAGTTCATGACGAACAGATTGCTATGCAGAAAACAGATGGTGGTTGATGTCCTACACCCTGGTCGTGCAACTCT
TCCCAAAACAGAAGTAAGGGAGAAATTGGCAAAAATCTACAAAGTCACAGCCGATGTCGTCTTTTGCTTTGGTTTCCGT
ACACACTTTGGTGGTGGCAAAACAACTGGGTTTGCTTTGATCTATGATAATCTTGACAAGGCTAAAAAGTTTGAACCCA
AATACAGACAAGCTAGGCACGGACTTTTAGAGATTAAAAGAACAGGCCGAAAGCAAAGAAAAGAGAGAAAGAACAGACA
AAAGAAAGTACGAGGAACTGCAAAGACAAAAGTTGGTGCATCTAAAGATAAGAAGTAATGCTGATGTTTATGTGACAAG
TCATGTTTACTATTTATTTCTGTTAGAAATAAATTCTGAAGTACCTAAAAAAAAAAAAAAA
>Contig68 15930 reads, 813 bases
AAAAAAAAAAAAAAATAGGGATAACAGGGTAATATTATGCGTGGAACACTTGTAGTCCTGGTCATTTCGAAGCGTTTAT
CTTTCGGACTATCCCACTTAGACAGACAATATTCCAAGAAAAGATCATGCTTTTCTTACTGGCATTATGTGCTGGCCTC
AGTATATCGTCTGCTATAGTTTGCCTGCCAGGATTCTGTGACCACATTGAGCAGCCGGTGCTCGACTGCAAGGGAGGAA
TCATTCAACATGCAGGATTTTGTGGATGTTACAACATTTGTGCCAGGATTGAAGGAGAAGCATGCATAGCTGAGATGCA
CATCAGGGGCGTCCCCAACACTGCAATTTGCGATGAAGGTCTTGAGTGTGCCCCAGTTGTGGTAGATGGCGCTGAGCAA
GGTCACAGATGTGTGAAAAAGTCAGAAAACCCCTTATCTCAAAGACTGGTGTCACCCTGTGAGACGGCGTGCCAGAGGA
AGTCCCTCTTGTGCACCATCTCGATGGTGGTTTACCAGGGACAGTGGTTTGCCAAGTGTGATCAGCAAGGCAACTTCCT
ACCCCAGCAGTGCGATAATACCAACCATTGCTTTTGTGTTGATACTGTGACAGGCGAGATACAACAGGGAACAAAAGTT
CTTGGCAATGCAAACTGCTAAAGGAGTACCTCTCGCGAAACCTATTATCACTAATAAACAATAAAAAATAAAATGAGTG
GAAAAAACTTTACCTTAAATATACGTGGAACTTTGTGTATTAATATCCACAAATAGCAGGTGTGGTGAATAAAAATAAG
ACGACGAGAATTTGTCAGTCTCA
>Contig69 7164 reads, 637 bases
CTTATTACCCTGTTATCCCTATTTTTTTTTTTTTTTTGAATGTTTACATATTTATTAGTCAACTGCAAATAAAATGCAA
AGAGACTTGAAGACCACTATGCAACTAGAGCTGAGGCAGTAGAGGATTCATACTTCCATGTTGGGGGGAGGACTTTCTT
TGTTTTGTAATAACGAGCCAATCTGTGAATCCTAGATTCCACCAAAATAAGCCTGTACTTGGCATCTTTGTCCTTCCTG
CTTCTTTCTAAATGTTTACGGATGTTTACAGCCTTCTTGATCAAACTGTAGAGGTCCTCTGGTAAACTGGCAGCTAAGC
CTTTCTTTTTCAAAATGCGAAGAATTTTATTTCCTGTGACAAATCTGACTTGGGCAACGCCATGCGAGTCCCTCAGGAT
GACACCAATCTGAGAGGGGGTCAATCCCTTTTTGGCCAATTTGTATATCTGTTCCTCTACATCTTCAGCTGGTAGTTTA
AGCCAAACAGGTACAGTTCTTCTGTATGGTAGAGCACTCTGGGATATACCCTTACCAGGATTGTGCATGCGACCCATGT
TGGATAGAATTAAGAAAAGATTACCCTGTTATCCCTATTTTTTTTTTTTTTTTTTTTTTTTTKACCTCAGCGAATATAA
TCAAA
>Contig70 5088 reads, 498 bases
TTTYACAATTACTTTCTGTTTTATTTGGAAATCCACTTAAATGGTTGTTTCTCAATGTTTAATTTTAAATCCATTTTTT
TTTCATTGACAATAATAGAAGATATACAATGAAGCTTAGAAAAATTCTGTTAAAAGCAGCCCTGTCTAATTTTGCCAGT
GCATACACAAGTCCAATTATCAAAGAATGGTGGACCATAGCGCTCATGACGCTGACAATATAAATTGTCATAAGTGCAA
TTTCCCTTTCGAAAGCCAAGGTCCAAACACAGAAATGGGCATGGCAGTTCTTCGGTCTCGTCAAACTGTTCACTGAACG
TCATGCATCCCCAGTACGAAGGCCTGCATTCAGCAATATTATAAGGGTCTGAATAAGCCAACAGATGCACTACAGCACA
GATTATGATCACAATAGTTGTCTTGAAATTTACAATCATCTTAACAACTTAGGTTGGTATTTTTATTACCCTGTTATCC
CTATTTTTTTTTTTTTTTTTAAAA
>Contig71 9124 reads, 767 bases
AAGCCACAAGAGGAGAATTGAASACTGGCGCATAATTCTTTSACGCCACCCTGTTATCCCTATTTTTTTTTTTTTTTTT
TGCAATGTTTGTCTTTATATGATTACAAAGCCAATGTGTAAGAAAAAAATTACTTAACGTCTCTTTTACTTTGAACCAA
TGACAAATAAAGAAACATGATATAATTTTTTTTAAATATAAAATAACAAAACGAGTCCATTTTCTATCAATCGAAGTCG
ACTATTTTGTAGTGCAGCCTTGCTCGTCCCAGCCGTTGCCACAGTCGTTGTAACCGTCACACTTCCAGTAGGACTCTAT
ACACAGGAAGTTGTTACACTTGATCTCACCATCGGGACAAGCAAAGTGCTCACAATCCGTTTCATCAGATAAGTCACCA
CAATCATTTGTCCCGTCACATACAAAGTCCCTGGAGGCACACTGTCCATTCTTGCATTTAAATTGGTTGGGGTGAGAGC
AATCAGTGGGACACCCAGCTTCATCTGATCCATCATCACAATCCTTCTCTGTGTCACACCTGAAGTCACCAGGTACACA
ATTGCCAGGTAACTTGCACTGAAACTCTTTGTTGCTACACGTCACGCGTCTAACAAGGTCTCTGGCAACCCGCTTCTCT
GATCTTTTGTTGACACCAACTGCAGTTGCCACCACAAAACACAGCAGAAACAGTTTCATCATCTTCAAACAGCCTGTGG
ATCCTACAACTGAATGCTCCAGTAATGCCAGWAGAGCGTCGTGTCAGCAGGAATGC
>Contig72 38198 reads, 962 bases
AAAAAAAAATAGGGATAACAGGGTAATATTGTATTCCAACGCTGAAGTCCAGGCAAACAATGTTTCCAAGTCTTTCTGT
TAGATGTGGATTCCTTGTTCTGATTATTATATCAATTTGCTTAGGTTTCCAAATCGTGTCCGGTGCAGCGATATGTGAC
ACCGTCTGCTCATTCGAACATGACCCGGTGTGTGGCTCTGACGGCAGAACCTACAGGAACTCGTGTCTGCTCCAGCTGA
CCAACTGTCTGCAGTCATCATTCGTCATCTACCAAACACATGACGGCGCATGTTAACCTGTTATGGACACTAACCCACA
CGACCCTCCCCCCACACACATTTTTTTGTAATTGGCAGCACAGGTCTGTGGCTCACCTCAAGTCCACCCTCAACTCCTG
GCCCACAGCAGTTTCTAACACACGTAGAGAGCTGACCTGGGAGTATTGTGTTCTGGTCACCACAATGGCCACCAAGATG
TTCTTGTTGTTGTGTTTGGGCTTCTTACTAACTCTTCAATCAACTTACGGAGCCGTCTCTTGGGGAATTGGTGAATGTC
CCAATGGAGCCAAACCTGGTGACTCGTGGTACGAAGAGGGAAAGTGCGAGAAGTGTGACTGCCGCGAGGGCTCCTTCAC
ATGTTACAGCTGTGGTGTGTACGCCCTCGACTACGACATCAGCATCTGCTACAACTACCATGACGTCACCAAGCTGTAC
CCTGAATGCTGTAATCCCATCGTCCGGTGCCGTGGTGACGCAGGATTTAACGAAACTCTGTTTCAACAGTTGGCTTCTG
TCATAAACTAACCACCCCCCCCAACCTCAGACAACAATGGACTCGTTCAGTATTCACCCAAGGTCAAAGAGCAAGACAT
TTCGATGAATTTATCCACAATTATCCAAGAATGATCCACTCATTAAAAGTGGGTGAACCCAGCAAAAAAAAAAAAAAAA
AAGGGATAACAGGG
>Contig73 8850 reads, 807 bases
ACACGACGCTCTTCCGATCTGGTAATGACCTGTCGGTGTATTCTAATGGTGGTCACAATTATCTGAAGCGATCAAATCC
TTATCAAGAGAATCTAACACCTGTCGCTGATTCTTTTGAATTTCTTCCAACATTACATTTTGTAAAAGCTAAAAAACTT
GAACTCACAATAAGTTTAAGTTTTCATAAAATATATAAACAATCCCATTGACGTCACGGAGACTTTTGTTGCTCAAGAT
TTAAAATATTAAAAAGTTGGTTAGACGTGTCAAGATATCAAATATGCACACAGGAGTGGTCATCACACTGGTCAGTCTC
GGTTTCCTGGCCTCTTCAACGGATGGTGCGGCCTTTATGCAGATAGGTGAATGTCCACATGGCCACAAGCCAGGAGATA
CCTGGGACGATGGACAGTGCCAACGATGTGACTGCATGGAGAATATGTATGCCTGCTACAGCTGTGGTGTCTATGCCAT
TACTTTTGACCAGTCGTCCTGCTACAATTACCGAGAAGATCAAAAACCTTACCCGGATTGTTGCACCCCAATAATAAAA
TGTCGAGGCGATCAAGGTTTTAACGAAACAATGTTGTTAGGCTGATTCAGTCACATAATAACGAAAACAGCTTTGTGTT
GGTCATCGAAATGGACAGTGTGTGATTGGTCGAATAATTGTCTTTGTATCTTAGTACCTTGTACACCTGTTAAAGCGCG
AACGTACATTAAAGTGTGTACAGAAATTCATAATTTAAGTATTGTATAAATAAATGTCACCTTATAAAAAAAAAAAAAA
AATAGGGATAACAGGGA
>Contig74 25363 reads, 1361 bases
AATGAACCAATTTGAGTGGCACGACACAAGTGTTTGAAAGTGTGTGCTCCTTCCCATAACAAACTAGRGRATGCTTCAA
CATTWCCCTGTTATCCCTATTTTTTTTTTTTTTTTTTCGTGCAATTATCAAACAAAAACAATTTTATTCCAAAAGTCTT
AAATTATCATTGTCATCACAATTGATATTTTCAAGACTTTGCACCGAAGAACTCTTTCACAACGAATTGGCGACTGTAA
AATGTCGTATCATTGAACGAGTAGCGTTTAAATCCTTCCTGCCGTGTGGTCACATGATCTCACGTCAAGTAGACACTAA
CCAGAGAGGTGGTGCATCATGTCGTGAACTGCTCTCATCTGTGGCCCCGAGTGGAAGGCGTAATAAATACCGGTGTAAG
CGAACCAATCCCAGCAGCCCATGGGGTTCAAGGCCGACACTAAGACTTGTGGGTACAAAATGATGATGTCATTCAACTC
TCCAACCTCATTGTAGCCCGAGTGCTTGACGTACACGTCACCAATGCGCTCTCTTCCCATTTGGCAGCCATGGAAGGCA
ATGTGAAGTTTGCAAGCTTTAGTTTTATCCTTACAGCCAGTAGGTATGTAGATGTACGCTATGTTGTCCATGTGTGCCA
GGTAAGACGTGTAAGCGCTTTGTTCGAATTGAAGCAACTCCCCTGTTGCTACGTATGTGGGGCTTGGTTCCTTGAGGTT
ACCGTAGATGAAGTTGAGCAAGTTGAATGCAGCGCTGTAGCCACAGTTGTTCATGTAGTTGTTTGAGTGAAGGTCACCA
CAGGATCCGCCAAAATTGTTCGTGATCTGTCCATGCGCTGACGGGATGTTGTTCACCAGTTTAATCTGACTTTGACTAT
CAACATAGAGGCTGTAGTAGTTCTTCAATAACGTCCCGGCAGCTGGGTTGACCACTGTGTCGTGTGTACCAGCGAAGAT
CCAGATTTTATCATTTCTCATGTTGGTGGTTGAGTCGATGTTGAGGAAGAGACGAGCGGAGGCGGTGAGAGTTTGAAAC
TCAACGGCCGTTAGCAGGGCGGGTGTCGTCATACAGGCCGCGGATGGGGAACACAGGAAGGGAACCCCAGCAATAGCAC
CAACGCCCATAATCTCGGAAGAGAAAGCCACGTGGTATTGAACGGCCATGGCTGCACCAGACGATATACCGGAAGTAGA
TATCTTTGTCTTGTCCACCTTCAGTACCGGTAGAGTCTGGGCCAGAGCGAATGAGTAAAAATGTCCAAACACAAATAAC
AAGAAAATCTTAGACGACATTTTTCTCTGTATCTACAGTCCTCAAAACAAAGCAATGACATTACCCTGTTATCCCTATT
TTTTTTTTTTTTTTAGAA
>Contig75 15030 reads, 695 bases
ACATTCGGGCAGTTGGGGGCCCAGCCGAAGTCATCTTTGTTTTCTTTGCGCAGGTACTTATTACCCTGTTATCCCTATT
TTTTTTTTTTTTTTTTCAAAAAGAGCTGTTATTTATTCCATGAAATAAGTTATGAAAACAGTCAAAGGGATAAAGACCA
ACTAAAAATCTATTGCTTGCTGTCGTTTAACCAGGGAGGCCAGAGCCGACGGCGGTGTGGAACCATCTGTTGAACTCTT
GGGCAGAGACTTGGTTGTTGTCGTTTTCATCAGCCAGGTTGTAGAGGGCTGTGTAGTCGACGTTGCTGAGAACATTGTC
GTTGTTGGAGTCTAAATCGTCGAAGAGATCATGCAGCGCGCGCTGTGTTGCTGGGTCATGGCTGTACTGGGCGTTGATG
TGGGCGTTGTACTCTTGTCTGGACACGTCACCATCGCCGTTTGTATCAAATGTATTGAGGTAAGAGCTAATTTCAGCTC
GTGTCAGATGTCCATCGGTATTGGCGTCGAAATGACGGAAGAGGGCCAGTTCAACGCCAATCCAGTTGGGTTGGCACAT
AATGAAGACCGGGAGGCAAACGAGGATGGCGAATAAGCAGTTCATTTTGGATGTGCTTTGTTTTGCAGGTAGCTGAAAC
AAGTATTACCCTGTTATCCCTATTTTTTTTTTTTTTTTTTTWTCCCTAGCCTATAGTGAGTCG
>Contig76 19043 reads, 627 bases
TCTGAGGTCSTWATTACCCTGTTATCCCTATTTTTTTTTTTTTTTTTTTCATGTAATCAACCTCTTGTTATTTATTCAG
TTAATTTGATAACTATCCAACCCTCTGTGCTATTTCTTTTGCCTTGGCTTTCTCAACTTTGGCAACACGGGCTTGAGAT
TTGGAGCCCATAACACCACCGCCCCAGTGTCTTCGAATCTCATCAAACCTGTCATTAAAGTTGGTCTTGACAGCTTCTA
CCAACTTGTTTAGGGCTGGTCGATCCTCAGGGTGTACTTGGGTGAAAGCCAAGCAGGTGGCTGTTTTTCTGTGTACAAC
CTGTCCAAGTCTTGCCTTTCCCTTTACAATGCAATAGGGGACACCCATTTTACGACACAGTGCAGGCAGGAACAGAACG
ATCTCAATTGGGTCAACATCATGGGCAATGACCACCAGTTGAGCCTTTTTAGATTCAACAAGTGCTGTGATTGTGTTGA
TTCCTGATCTCACAACAGGTGGGCGCTTAGTGGGGGTGTCAACTTTGCCAGCAACTCGGTCTTCAGCACGGCCTTGAAG
ACGGGCTTCTTTCTGCTTTCTGACCTCTGGTCTGTATTTATCCATAAGACGAAACAGCTGAGTGGCTGTTTGCC
>Contig77 12235 reads, 540 bases
AAAAAAAATAGGGATAACAGGGTAATACACAATGTATTTAATCTCTCAGCTGCTGTATTCTAGGAGTACACACTGTTGG
TCATTTCTACACTAAATCAACATCTATCGTATTCAGGTTTAAGCCACTCGAAGAACATGTTTCTCAAATTTTTCGCAGC
CCTTACCGTCCTGTGTCTAGTGGCACAGTTTAACTTTCAAGCCGAGGCGGCCGCTATCCCACTGTGTGAACTAATGTGC
ATCGCGCTCTACGACCCGGTGTGTGGCTCTGATGGTAAAACATACGGCAACAGCTGCAGCCTGTCATCAGCCAACTGTG
GACTGCCCGAGTCCCAAAGGGTTACACTGGCCCACACGGGCGAGTGTTGATACTGAAGTCAAGACCATCGTTAGATATA
TTGAATGAAAGGAATACAGATAACAAGTGCATGTCATGTTAACGTGTTTCTGCAAAAGAAATATTTAAAAAGTACAAAA
CATATAAATAAATAAATTGTGACTGGNAAAAAAAAAAAAAAAAAATAGGGATAACAGGGWAATAAG
>Contig78 11230 reads, 619 bases
AAAAAAAAAAAAAAAAAAATAGGGATAACAGGGTAATACTGGACTTGGACCTGTCAGGAGAACACAACTCGTGACCCAA
CAATTCAACGAACAATGCTGCGTGGGTTTATCTTGGTGTTAGTGGCAACAGCGGTTACTGTTCTTGGTCAGCACACGTG
TCCAGTGTGTACCAATGAGCTGGACTTCAAATCATGCACCGGCGTCCATACGTGTGAGACCACACAAGAGCTCTGCCTG
CTCAGGATCGATACCGCTCTAAACAACAGAGTCGAATACCACTGCTCTAATCCTACTGTTTGTGAGAGATACGCCGCTG
CCCCCTGTGACCCCACCCACGGCCGCACGTGTTACTACTGCTGCACGGACGTGGACTCCTGCAAGGGTCAGCTGGAAGC
CATGTTCATGGGTATCCTGGCCGGAGGCTGAACTTCAAAATCTGTGCAAAAGTCACGTGACCGTACCCTACAGACGAGG
TCAATAAATGTAACAAATTTAATTAAACCAAGTCTTTTATTCCAAAAAAAAAAAAAAAAAAAATAGGGATAACAGGGTA
TTAAGAACGAGAGTAGTCGAGACGAGTGCGGGGTGTGTGGCAGAAAGCGGTGTAGTTCGCACAGTG
>Contig79 9976 reads, 514 bases
ATCGTGAACTCAATTTTTTTCGCTACTTTGCTCAGCTTCCATGGTCTTATTACCCTGTTATCCCTATTTTTTTTTTTTT
TTTTTTGTGAAAGCCACATTTATTAAAATAAGAGGTTGTTTCAGAAGTAAGCCTGAACCAGTCCTTTAATGCTAACAAA
AGATGAATCAGTAGACAGGCAACAGATGCATGCCTCTTTAAGGTCTTGTCAAATTGATCAGCATATGGCAGTAGTGACA
ATCTTGAAGGCAATCTGGTGTACATGAGTTTAGGCTGACTTCTGATGCAGAACTCCATACACAAAAACGACACGACAAA
GACAGGTTTACTTGGATCTCGCCCTCATCTTTCGTCGCTTTCGCTTCAACCTTCGCATACGCTTCTTTCTCCACTTGGC
TCTCATTTTTCTTTAATGAATCTGCCCTGTACGGAGCGATCTAAAAGAAAGGACAGGAACCGGAATCTATTACCCATGT
TATCCCTATTTTTTTTTTTTTTTTTGCAGGCATCTTTTCC
>Contig80 8723 reads, 817 bases
TACACGACGCTCTTCCTAGAAACTAAAGCTATGCAGCAAATGTCAGTAATGTTGCTATAAATTATTTATATTAATTCTA
TTAGACATCGTGTGTTAAAACCCAAAGGCATCATATTTTGTCAACAAAGATATTTTATACTAAAACTCTTTTAAAGTTT
AAATAAAGGTCTATTCAAAATGATAGATCCAGAACTGCATCTCACATAAACAATAAATATTTTCTTAACGATAGTCCAA
TACTTATATCTTAATGTCAATCACTCTATTCTGTGTCACGGGTGAAACTCTTATATTTTACTAAACAAAAAAGCTACTG
CAGTTAAGAAGCACGTCAAGGTGCCAACGACCAGGGAAGAGGCGCCACAGGCGACATTCTTGAGCCTGTTAAATTCATC
GTCCGTACAAGCCTTGGACTTGACCAAACAATCGTAGGTGGACACACCCTGGTTACTGTAGTTCATCAGTTTGCAAAAT
TGTTCTTTTTGAAAAAGTGCTTGAGCGTCAGGGGACGAGGTAAGACATGCAGCGATGGCAAACTTGCAATTAGTGGAGC
ATGAATCTATTGCTTGTTGAAAGGCTCGTGCTTTGGCGTCGGGTGTCGTGTCAGCCAGGACCGTCACCGCCAGATTCTG
GAAGAGGCAGAGCACCGCAAGCGTCAGGGCGAGGTTGTTGAGGAGTCGAGCCATTGTGTGTCGGGACGAAAGTGATGCT
CTGAGTGTATTCTGTGCGTGTTTGAGATCAAAGTCCGCAATTAATCTTGTATATTACCCTGTTATCCCTATTTTTTTTT
TTTTTTTTATAATTTTTCCCCAATTTT
>Contig81 12126 reads, 651 bases
TATCCCTATTTTTTTTTTTTTTTTTTGAAGTTCATGTTTTAATTTGTATTATGACAATATTTTTTTTAAGACAACGAAA
CAATAATATTTAACTATTTGGATAATAGTTGTACACTATGCTGCTCTTTGTCCGTCAGCAAATGAGTACGATTAGATAA
ACTTTGTAGAACTTAATTTGCCTATTAGTACTCAAACTGGCTCCCTGCCAATTAGGAACAGAATCTTCTATCAATAAGG
TGTCTCCATGAACAGATTCTTTAACAAGGCACGTTTCTGGGCATCTGTTAAATCATCAGCTTTTTGTCTCCAACCAAAT
AATTTACCTATTCCACCAGCAATACCCTGAATAGCCGGGAAAAGGTTGTCCATGCTAAAGCCTCTTTCTGCCTTTGTCA
TTTCGGCAAATCTCTCCTCAAGAGTCTTTTCGTCGAAATTCACTTCTCTGTCCTCCAGTTGCTCAGTGTCCTCGCAATT
CACCAGGACGATGAGCAGGACACAGGACAAGCCGAGGATTCTCAGGTAGATAGAGGACATGGTCAAGATGGGCAGGTTA
TTTTCTGAATGCTGCAGTGTGGCTAAAGTCAGGTGTTAATGATATTACCCTGTTATCCCTATTTTTTTTTTTTTTTTTY
CTGTTATCCCTATCCTATA
>Contig82 6656 reads, 473 bases
AAAAAAAAAAAAAAAATAGGGATAACAGGGTAATAATCACGTTGCAATCTTTAGTCGAAGTAGAACCCTAATAAAAGCC
TGAGAATGAATTCTTTGAAAATATTTCCCCTTGTTGCCATTGTCTTACTGCTTGGCTGTGTCGGCGCCAATGTCATAAC
CAAACGTCAGACAGATTGTGACAAACCTTGTCCCCGCATCTACAGCCCTGTGTGTGCGAGTAACGGCAAGACTTACAAC
AGCGAATGCGAATTCGAAGTTGCAGATTGTAAGAAACTAACCAAGGATATTGTATACCTCGTCCACGTGGGCCCCTGTG
AAAGTAAATAAATTCAGTCATTGAATTCAACTGTTATATTATACTTCTCTTTAAAAACGTTTGAGGTCTTATTATCTTA
TTTCCTTTTGAAGTTACATGATTTTTCTGTGAAATAAATAAATATTTAATTTGATGGTGCTGTTTAATAATTATTTTT
>Contig83 30022 reads, 784 bases
ATTACCCTGTTATCCCTATTTTTTTTTTTTTTTCTTGATGCACCAAAGTTTATTTTTTAAAATCAGGTTTCAAATAATA
AAAGTCAATAAGGTTTTAACGATGAACGAAAAACAGATGTGAAAGCTTGGAAACTATTAACTCTAAGTGAGTTATTATT
TAATATCTCGCCAAAGGCTAAAGTCCATCAACAGAAAATGGAGGAATAAAATTGATGCAAACGTCATTTCTAGTGCTTT
TCATTTTTCATGCACTAGGCCTGACCAACAGCTGCTAGAAACCAACTGTTGAACTCTGCACCGGAGACCAGGTTGTTGG
CGTTGGTGTCGGCCTGGTTGTAGAGGGCGGTGTAGTCCGCGCTGTTGAGGCGGTTGTCGTTGTTGAAGTCGAAGTTATC
GAAGAGGCCGCGGAGCGCAGTTTGAGTGGCTGGGTCGTGGCTGTACTGAGCGTCTATGTGGATGTCGTATTCTTGTCTG
GAGATGTTGCCATCGCCGTTGCTGTCGAAGGTATTGAGGTAAGAACCAATTTCACTTAGTGTTAGACTCCCATCATTGT
CACTGTCGAAATGAGAGAAAAGTGCTGATTGAATCGCGAGCCAGTCGGGTGCACCAAGTGTGATGATCGGAAGGCAGAT
GAGAAGTACCAATGCACAGTTCATTTTTATGTGCCTTGAGTTCCAGCAATCGAAATAAAGTTAAGATGCTCAGGAATCT
TTGGGCATTCAAATGTATTACCCTATATATGCAYMTTACCCATCAACGTTGTGGTCTCCAACAACCCTTATAT
>Contig84 5668 reads, 837 bases
AAAAAAWRAAAAAAAAAAAAAAAAAAATAGGGATAACAGGGTAATAATTTCTGCTCACAATAAAGTAAAGCGAAGTAAA
AGTGTTCAATTCAAGTTCTCTAATTAAATTGCAAAATGTCTGGTAAAGACGGAAACAAGAAGGGGTCTCAGCCCAAGAA
AGATGACAAGAAAACTGAGGGCTCCAAAGCTGGAGAGAAAGGTGCCAAAAAGGACTCCAAGAAATAACTAGACGCCCCT
AATGGACACTTCATCTTCATCCCTCATCCTGTTCATAGTCAGTTGCGTCCATGGTCATTGATCGAATGCTGACACTGCT
TTACCTCGATCGATGTTGTGCCGTCAGCACATTAATTTAATTTTTTAAAACTTTTTTTTTAATGATTGACATTAAATGA
TGTTGTAATGTAAAAAAAAAAAAAAAATAGGGATAACAGGGTAATTTGSACATNCANGGTKTAATTGCTGGGAAAATTT
AATGCTCAAGGATTGCAAAATGATTATGAAGTCTTATTGCGAGTGACTAAGGGACAAGAATATGTCAAAGCTATTCTTC
AGAACGGCCGGCTTGTTGGTGCCATTTTGATTGGTGAGACAGATCTGGAGGAAACGTTTGAGAATCTCATCCTGAACGG
CATGGACCTGACGGCTTTCAAGGAGAATCTCCTGGAGCCTGGAATTGATGTTGATGATTTTTTTGACTGATGACATGTT
TGATGAATTCGTAGGATGTCGAATGTGATGGGTGACATCGAAATCGACATATGATCGGAAAGGTGAAAGGAGAAATACA
TTTGAGGATGTTATTTATGTGAAGATATGCGTGACCATGTTGTCTGT
>Contig85 10432 reads, 812 bases
AAGTAATCTCGACTCTATAGGCTAGGGATAACAAAAAAAAAAAAAAAAAATAGGGATAACAGGGTAATAGACCAGAGAA
GCGCACTGGAAGCTCTGTATTATTTAGCAGTTCCCAGCTGTAAGAACAACTTAACCGTAACTGAAATCTGTACTGTTTA
GCCGACAAAGAGACAACCCGAAGATGAAGTTCCTCATATTTGTGGTATTAACACTTGTCGCAGTCCAGGCATATCGGAA
TCCTACTTCAGTCTGCACGCCATACGCATTTGAAGTGGACTTTTACGACTTTGACTTGGCGCATTTCGGAACCGGCGTA
GTCGATCACGACTTAAGAAAGATGGCAATCTCTGTTCCCTCGCGTTCCCTTATTGTATTGTATAACTGGGACACTTTGA
GAGGGTACCAAATTGATACACATAGAAACACATGTCATCATTTTAATGTGTCGGCTGCCGTGATTCCTCCTCGGTGCTT
AAGCGCGTCGTCTACTCCGCTGAAAGACGGCACATTGAAAATCGGCGATTATGTCACCTCTAATACTAATGACGTTGTG
GCCTACGACGTTCCCGTCATACGCGGTCTGCAGTTCAGAGTTATATTCACCAATACCACTCCCGCATACCCCGTTTACA
GGCAACTGATCACCGAATCAAGATTTCTAACTCATCATATGGGAAAACACCTGCTCTTTTTTAACACAAGACGCTATAA
TATACAAAGAAATCTGTTCGACAAACCATCATCTTGTGGTCAGACTTAACGTGTTATTTATTTTGTTTCGGAAGAGCGT
CGTGTAGGGAAAGAGTGTAGAT
>Contig86 18773 reads, 990 bases
GCTAGCGTGGATGTATGGTCTTTCTAGAACTGAAAGTCAGAAGATGATTTAATTTTGCTATTACCGCTTTCAGCCTTAT
CTGACCACACAACACATTGGTCATACTCATTCTTTCTCATCTTTTATCTCACAATCTGATATACTTATGTCCACACATT
TTTTAGTCGTTGGACTCAAATGTCTCCCCTCCTTGCATGACCTTTCCTTAGGTTTGTAATTAGTGCACTGATAATATTT
GCTACAAGACGTTGGGTGTGGTAGTCTACCAAGACTTGTAGTTCGACAAGGATTAGTCTTTTGTCCAATAGCTAATCCA
ATGCAGTCGATCATAAGCAGCAGCAATGCAGACGTCAGCCCGATATTCATTTTATTGAAATTTTTGAATGAAGCCGCAC
AAAAAAAAAATAGGGATAACAGGGTAATATATTTTATGACCTGCCAGTCACCAACAGAATGTTTCGCCTTCTGTGCTTC
TTGTCCATTGTCTTGGTCTACGTGGGGGCAGACATAAACATTCCCATCACCCACTACGCCAATGGATGGTTCCAGGCTG
ACGGATGCTTCAAGGTCACTCAAGAGTTGACGGCATGGACAGTAACACTCACTTTTGACCAAACCATCACTTTATTTTT
TGCCCCTGAAGCAAACCTCAAGCAGACACTGGACAATGGTAAGGTCTACATCCTTCAAAACAAGACCTGGAACAAAGTC
CAACATGTTGGGGATCAACTTTGCATTCGTTTTGAGGGACGTGGAACAGGAGCCTCTGAACCTGTTGTTACTGGTTCTT
TAAAGCCAGGAAATTGAAAACCATCATACGTCATTTGTCAATCAAATGACCTAGATTTGTCTTTTTCGGAATGCAGGGA
CTTCAATTAAAATCATGTTCCTCTGATACCAAAATTTGCTACCTAAACTCGTGTTTTACTGATTCCTTTTATATTAACT
AACATTGAACTGTATTGATTTAATCTCAMTGTRTTATTTTTA
>Contig87 8189 reads, 612 bases
AAAAGAAAAAAAAAAAAAAAAAAATAGGGATAACAGGGTAATGCAGTTAGTGGCCTTGCCTTCCCGAAGCCCTCCAGAG
AAGTCTTCCCATCCTGCATCTGTTCACTCCCACGACGTGCACAAAGAAGATTCTCCAGGATGTTGTCACGGAGTTACTT
CCTCTTGCTCCTGCTCATCGCCACCCAAAACCTCACTGTGTTCGGAGACTGTCAAAAGAGACAAATTTTCGGAGAACTG
TCTATACCAGGACATCAAGCGATACCATGGAGATATTATACATGTGTGGACAACACAGTTATTTCACCTATGCCGAACT
TAACAGAATCAGAGATTGCGGTCTTCGTTCGAGATTGTTGTGGCTGCAGAGTTAGTAGAGCAATTTTAAGGGAGCTTCG
AGTCCAGCCGTTAGCCCCCAGCTCAGAGAGCCGCACAGTCTACGTGCCAGAGATCAGAGCATGTGAGTGTATTCCGTGT
GATAGAACCTACCACAGCTGGATCGACTATTTCACGACTATGGAACACAAGAAGAGGAAATAAACAAAACAAAACAATC
AATACAAATAAATTGTTTGTTTTTAAAAATGAAAAAAAAAAAAAAAAATAGGGATAACA
>Contig88 5499 reads, 698 bases
CCCTGTTATCCCTRTTTTYCTTTTTTTTTTTTTTTTTTTTACAATAATTTTATTGCCATAAATTATGGGAACTCTCATG
ACCAGTTGAGTATTAAATTAAAGCGATGCTTGATCGTGTCAGTTCATTTTTCAATACACATTGACCTCGCATCATAGAG
AAACAACTTCCACTATTTCACGTCGATTCCGAAAAATCTAGGACGTGCAGCCATGACAAACAATGTTACCATTGGCACA
TTCACAAGTGTCACAATCTTCAGATGGAATTATCTCCCTTTCCTTGAATTCCTTTCCATCAAGTTGACATGTATCGATT
GTGGGAATATTGCACGCCATCAAAGTGCAAGCGATTACTTTACCAAAGCAAGAACAGTTGTTGCAAGGGTCCACTTGTC
TGCCCAACGATGTCCCACTTGCGTAGCTAACTCCATTAACTCGACAGAATTTATCAGCGGCATCCTCTTCTCCAAAAAC
TAAAGTAATGCAGCAGATAACCAAGACGAGATATTTGAAAAACTCTTTCATTTTTTGTCAACTTGTCCTAAACAAATGA
TTCCAAAGATATTGTTAAAAAGCACTGCAAACCTTAAGCTCTTCAAAAACAGAAAGAGATTATTCAACAGGGAACTACT
CTATTACCCTGTTATCCCTATTTTTTTTTWTCGGAAGAGCGTCGTGTAGGGAAAGAGTGTAGATCT
>Contig89 15445 reads, 552 bases
AAACAAACAAAAAAAAAAAAAATAGGGATAACAGGGTAATATCAGCAACGTGCGTCCACCTGCCACTGTATCAGTAGCG
GACTCACTTGCCCTTCAGCTCAACCTTATGGCCTACACAATGAAGGCTGTCCTTGCTCTCATCGCGGCCCTTGTGGTTG
CCGCCTCTGCCATCTCCCCAAGTGAAGAGGAAACGAGAATCTCAGCCCTGGAGATCGTGTACGCCAATGTCGACATCCG
GTGCCTGTTTGACGAGGTGCTGTGCAAAGATCTCCACACTGTCTGCCTCGACAAGCCGAAACTCATTTTAACACAGAAA
TTATTCTGCGACAAAGAGATGAAGCGTTGTATCGATGGGTTACCAGACGACTGCAAGAACAAGAACCTCAACTCCGATG
GCAGGTTGACGACACCAAAGCCAATCCAAAAACCGGTTATTCATTGAGTTACACAAGCAACGGTGTCATGGCAACGTAA
TACAGCAGCTTTTAGGTGACCAATTAAAGCAGCCCATACATTGAAAAAAAAAAAAAAAAATAGGGATAACAGGGTAAT
>Contig90 18875 reads, 588 bases
AAAAAAAAAAAAAAAAAAAAAAATAGGGATAACAGGGTAATCCTTTTTGTTGTTTTCCTACCAAAAATGGCCCCAAGGA
GAGGAAAGCCCCAAGCGCAAGAACAGGTGGTCCTTGGACCACAAGCAAAAGAAGGAGAAAATGTCTTTGGAGTAGCTCA
TATTTATGCCAGTTTTAACGATACTTTTGTACATGTGACTGATTTGTCTGGAAAGGAGACGATCGCTCGTGTAACTGGT
GGAATGAAGGTGAAAGCTGATCGTGATGAAGCTTCCCCATATGCTGCCATGTTAGCTGCCCAAGATGTAGCTGAACGCT
GTAAAGGTCTTGGAATTACTGCTCTGCATATTAAGTTGAGAGCTACAGGTGGTAATAGGACTAAAACCCCTGGACCTGG
AGCACAGTCTGCTTTGAGAGCTTTGGCACGGTCTGGAATGAAGATTGGTCGTATTGAGGATGTTACTCCCATTCCATCT
GACAGTACCAGAAGAAAGGGTGGTCGTCGTGGTAGACGTTTGTAGACTAATGTGCACTCAATTAAAGTAGCCATACACT
TTCAAAAAAAAAAAAAAAAAATAGGGATAACAGGG
>Contig91 25939 reads, 1004 bases
CGCTCTTCYGATAYTGTTTAATACTGAGGGTAAAATTGTGTGTTATCTTAACCAGATGAGTGAAATAACTTCACTTATG
GAATGTTTGCCCACTTGGTAAAATTTGTTTGCCAATTAAATAAACCTAAACCAACCATCAAAAAAAAAAAAAAAATAGG
GATAACAGGGTAATACTTTTGTCAGAAGACTTCCATTTCACAATTAGAATGTTCATCATTGTCTTGTGTGCTCTCCTGG
CTTTTGCCAATGCAGGCCCTAGGACCTGTCATGGTGACATCACCAAACTAAGTCCTAAAGGAAGGCTATCCGGAGGTGT
CGCTGCTTCTAACACCGCAGTGCAACATGATCTCCCTGCACTAGTCGCACATAAGAACTGTTACGACGCATCTGCCGAC
AAAAACTGTATTCAAGCCTCTTTGATTGCCGCCCTTGCCAGCAGAGAGTCCAACGGTGGAACCGCCCTTGTCAATGGTT
ATGGTGACAACGGCAAGGCCTGGGGCATCTTACAGTGTGACATTGCCCACTCTGGACTCCCATGTACTACCGTCGCCTG
GAACAGCTGTGCCCACATTGAGATGATGGTCAGCAGACTCCTGGTGCCCTACATTCAACAGGTCTATGCCAGACATCCC
ACATGGACGCTTGACCAAGCTCTCCAAGGCGGTGTAGCTGCCTACAACTTTGGCGTCGGCAATGTCCAGACTTGGGGAG
GTGTTGATGTGGGCACCACCCAGGGAGACTACAGCAATGACGTCATCGCCAGAGCCCAGTACCTCCACTCTCACGGATG
GAACTAGACGCCAGGCGACCGTCATCTTGGAACAGGGAAAAGAAGACCCAGGGAAACAAAATGAAGCCCAGTTTCAAGA
CCAATGCTTACATCTGTCTCGACTCAATGTCTACACCCCTTGCATAATTATGAGGGGAATAAATGTGACTGTATGAAAA
TAAAATGTAAATAAGCGAAAAAAAAAAAAAAAAAATAGGGATAACAGGGTAATAAG
>Contig92 18442 reads, 749 bases
ATCCCTATTTTTTTTTTTTTTTTTGCCTTTGAAAACAATACCTTTATTTCATGGATTTCATTACAATTTAGTGTTTGTT
TTTTTTAAATAATAGAAAATATCATGTTAATTTAAACAGAGGGTGAGTAACAATGACCTGAAGAAGGGTTGCTTGAAAC
CAAAGTTAGTTTACCTAACTTTTTACGCGTAGCGTACTTACAACTTAAACTCAAAATGTGTATGCATAAAGAATGACGC
ACGAAGCAGTCGTCACGTTGCTTGAATGAGATCATAAGCATCGGCGTCCACGCATCCGAATTCAGATTGTCACCTGGAT
TGTACACGGGATTCCCCTCGTTTTGAAGGCATTCTCCGCAGTGACGATGATCTGTCGTCTGACAGCTGGACCTAGTTGA
CACGGCAGATTAAAGATGCACCTGATGTAGGTATTCGCCTCCTGACAGTGGAGGGCGAAGTTGATGCCGAGACGTAGTG
AGTTGATGAGGTAATTACTGGTGCAGGTGCTTAAGCCACTTTGACAGGGATCCCGCTGACCACAGGCGTATGATGTCAC
CAGCAGGAACAGGGCAAGAGTGGGAAGGACGTACATGGCGGGAAAGTTTGCTGTTTCACTTAAGAACCTACAAGACTCG
GATGTAGTGACCACGCCTTGTGATGTGTTGACTCTTGACCGCAGGGGTTGGAATATTACCCTGTTATCCCTATTTTTTT
TTTTTTTTTTTTTTTTTTTTAGCAAATAAAATCCTTTA
>Contig93 6984 reads, 716 bases
ATTTAGCTATTTTGATTTAAATGATTAAATGTTTACTTTGTCACAAGGCAATAATAGTTTCCTAGATAGTTAAAATATT
AAAAATTTTACTTTAAAATATAAGACARTCTTTTAAAATAATAAAAAAAATATTCTCTTTATCACTTGGCTCCTTTATC
ATATGTGAAATCATCGAATGTCTTGTTCCTGTCTCCAATCAAGTCCATTACGTTACAGCCTTGTAATGATACAATCATA
GAATGTGTCGTTATAACGTGGAGGCGGTTTGCACCACTTAAAATTCGGATGACGATAATCGTGCGGAGCCAGAGTGCAA
CAGCCGAGAACACATTCAGCACTGTCATCACATGGCATGTGTTTTCGCAAAGTAATCCTTTCATCGATGTGATTGAAGT
TATGAATATTCTTGCAGAAGTTTTTCACTGGTCTCAATTCACTAACGAGTTTAAAGCAAGTCTCGTCTGGATTACAACA
TCGCTTGCTATCATAGCACACCGCTCCTGTTGTGGCGCAGCCATGCTCTGCTTTAGCGGTTTCCATATAAGTCAGGAAA
ATCATCAGAAATGAGAACATTGAGAATGCCATCATAAAGTGGGAGTTTACCTGAGCTATAAAACAGTGAGACTCGATGC
TTCTAGTATCGATTGTATTACCCTGTTATCCCTATTTTTTTTTTTTTTTTTTTACCCTTTTTTCCTTTTTTTTTTTTTT
TTTTT
>Contig94 10916 reads, 396 bases
CCCTACACGACGCTCTTCCGAAAAAAAAAAAAATAGGGATAACAGGGTAATATTCAGACAATCATTCAGAGATTAGAAG
ATATTGACTGCATACAAGGAGTGGAAGCCTGCGCCAACCATCCATTAGTTTCACAAGAAAATGGAGAGACGTATTGCTG
TCCAGTTGGCTACAACAGCATCGCGGCTGGTGCCTCCACAATCAACGGAGTGACACATGTCGCCTGCAAATGTCACAAC
TAGAACAGTTCTTCTAACAAGACTGACGTTATTTACTTTAGCAAGCCTTGAAAACATTTGAGAATACAATGTACAGTGT
ACTACAACAATAAACCATTAATCTCATAATGAACCTCAGTCAAAAAAAAAAAAAAAAAATAGGGTAGGGAAAGAGTGTA
G
>Contig95 8782 reads, 866 bases
CACTCTTTCCCTACACGACCGCTCTTCGGATAACAGGGTAATCTTTTTCCATATCAAAACTGTCCAAAAATGGTCAAAG
TCAAGGCTAAGGAGCTTCGTGGCAAGAAAAAGGAGGATCTCCTGAAACAGCTTGATGAGTTGAAGAATGAGCTTCAGAC
TCTTCGAGTTGCAAAAGTTACTGGTGGTGCAGCTGCCAAACTGGCTAAAATCTACACAGTTAGAAAGTCAGTTGCCCGT
GTTCTCACCGTCATAAACCAGACACAGAAAGAAAACTTGCGCAAGTTTTATCGCAAGAAGGCTCACAAGCCCAAAGACC
TCAGGCAGAAAAAGACCAGAGCCATGCGTCGTGCCCTTACACCATTTGAACTCTCCATCAAGAGTAGAAAGGAGTTGAG
GAAACAGCGTCTTTATCCTATAAGGAAATATGCTGTTAAACAATAAATATTGAATAAATGATAAAAAAAAAAAAAAATA
GGGATAGGGATAACAGGGTAATACGTATCAAACAGACACGTACAGCGCTAGGCATTCAGTGATCCAAGTTGGCAGAGAT
CTTTTCCTTGTTTGACAAACCTGATCTCTAGCTCTCTAATCTGGATTCCACCGCGGTGTGACTGCTTCCCTCTGTTTCA
TCTGTGATCCTATGACCAGCCTTTCTTTTGGAAGGCTTATTGACCCTCCTCTCATGACATCTCTATGTTGAGTGACACC
ATGGACAAGCCATTCGTTATCATTCTGTGCTAACTTCCATTTGTCATCCACAGAAATAGGACCCTGGTGTTTTTTTTTT
TATTCAAACAAGAAATAGTAGCCAAAACTCAAAGGCAATACACATGTTCACTATATGAGAAGTTTGGACCAGCAGA
>Contig96 20557 reads, 1155 bases
TTAATTAAAAATTTTTWTTAAAACTDAAAAAAAAAAAAAAAAAATAGGGATAACAGGGTAATATTCAACGATCGTCTTG
AAAAGATTTCACTTCTCCAGCCACCTTTGCACCTCAGCCAGATTTACAGAATGGACTACACGACACTTTTTGTACTGGC
GATTGCTGTAGTTTGCAGCGTCAACGCAATCACCTGCCCCTTGTGCACAGACCCCACCGATCGCACGTCATGTAATGAG
ACACAGGAATGTACAATGGGCAACGATGTTTGCGAGGCAAGAATCAACAGACACGCGAACCACAATATGGAATACCACT
GCGCACATGCTCAGAACTGTGCTGACCAAGAGAACAGAAGCGGCTGTGACAACCCGACCCACGTGGGTGGTAACTGCGT
CATTTGTTGTAGCAATGTCACCAACTGTGAGATCAAAGCTAACGATTACTTTGCAACCATCACTGTAGTAGGTTGAATA
CCCAAGAGTTCACATGGGATGACGTAATCATGTAATACTTGTTTTAATCTCTATTTTATAACTGTGCAATCTAACAAAA
TTGATATAAACTAAAATTAAAATGTTAAATKTTTAAAAAAAAAAAAAAAATAGGGATAACAGGGTAATACACAGCTTCC
CAACTGCTAACTTCGATCGTGTCCTGCGACAATAAGTAGCAATATCCAACCTTATTAACATTTAAATATGGTGTCTTGT
GCATTAAGTCTGGTTAGTTTGGCTCTTGCTTTAGTTTGCCTTGTCGTGTTGGTTAATGAAAGCAGTTGCTTTGAGATAC
CAGATGATGACAAGACAGACTGCAAAAGTAGAAATTGGTTTATGTTTTGTGACACTTGCTTAAAGAAGTTCAATCTTGA
TATCACGCGTGGTATGGATTGCTGTAAAAATTTCGGTGGCATCAGAGTATACTGTAAACTAATGACGGGACTCGAATAT
CCGCCACCATATGAAGAGGAACTCTAGCCAAACAAATAACTCAGCACATGACGTTGTCCAGTTTGCTGAGGGAGTTGAA
GCGCAAACCAATCGTTCAACAAACAAAATTTTTAAAATAAGAACAACAATGTCACGTCTTAAACAAAAGATTAAAATTA
TGAAACAAAGAAAATGAAAAGAGAAAACGAGMAAAAAAAAATAGGGATA
>Contig97 11465 reads, 599 bases
ATTTTTAAAAAAATAACTGAAATCCGAAACTTTAGAATCGCTTTAACGCATTGTACAGATTTACCGCACCATATAATAA
CAGCCTGTTAGAAACAAAGATTGAATACAGCGAGTGGTATATTTAAACGAAAATAAATAAATTAGGACCTACAGTGGTT
GAGTGTACTGTCAAAGAAAGACTAAATCCCTTACCATGAAAGTAGCGTTGGCAATAACGCTTGTTGTGTGCATCGGAAG
CTTCAATGTATCACAAGGGGCACCGGCCAGCAAGGCGTGCACAGGTCTACTGTACAACTGTTTCATCTCCCCATGTTCG
AACGCCAAGTGCTCAGTGAGTGGGGCAAACTGCGTTGATGACTACTGCGGTGGGTGCAAGACCCGTTGGTACGTCGGTG
ATGTTGAGGTGACCAAGCAGTGCGTGACCTTATCAGCACCAATAGCGTCCAGGTAACCTGGTACTGGTATCAGGCACGT
CGAGATGACCGTCACCTCACTTCGCAGCAGGCGCTCTTTAATGTCAGCTGTTGACGATATGTATGTACCTCAAGGAAAT
AAAATATAGTTTCCAAAAAAAAAAAAAAAAAATAGGGATAACAGGG
>Contig98 5704 reads, 529 bases
AAAAAAAAAAAAAAAAAAAAAAAAAAAAAAAAAAAATAGGGATAACAGGGGTAATCAGATACTCAGCTTGCTTCGTTCA
TCTAAATTTTCTTAAGTTCTAACACAACTGCAGACAGATGCATCGCATCGTGCTTATCACCTTCGTGATGTGTCTCATA
ATAGGTCACCTTGACCGCACCAGCACCCTGGCTTGTATGAAAGAGGAGGAAGTCTGCGAGAAGAAATACTACGATTGCT
GGTTACAGGCCAGGGGCGGCGACTATTCTCACTGCATGTCGAAAAAGTGGTGGTGTCTAAACTTCTCGAATTGAGTGGC
CAGAACGAAAATGTGTGGCGTCATTGGTTTTGTGTGACAGCTCAAAGACAAGTGGTGGTGTCTTCAGCTCCTGTCTGAA
GGATAAAGAGGTCTTCGTCTTGCCGAAGTAAAAACAAATAAACATGGAATTTTAAATTGTGTTTAAATATCAATAAATT
TAATTGTGGCCCATCAAAAAAAAAAAAAAAAAAATAGGGATAACAGGGTAATAAG
>Contig99 6892 reads, 570 bases
CAAAAATGGTGATCAGGAAAAAAAAAAAAAATAGGGATAACAGGGTAATATAAGAGATGTTTCCTAGATCTATTACACT
TCACTTGTTATTGAACTCACATAATCATGTACAGGATTCTCCGCGCTATGTGTCTGATGGTGATTCTGACAACGGTGAA
CTCACGCAACTACAACTTTAGAACTTCTGCTCGAGGAACAGCGTCATTACCGTTTGAAGCAACGGTGGCGACACCGGCT
ACAGCAGCAACAGCAGCAAGACCACCGAGGGAAGCTGCGGTCGAGGCGGTGAAGATGTCAGGCGAGGTCGTAAGGCCGT
ACAAGAAATCTTACAGATATACACCGAGTCGTTCTAGAGTTCCACACCCCGGGCACAATTTCCCACATCCTCGCAACTG
ATTTGCTTAAGTGTGTGTTTCGGTATGTGTGTGAGTGTGGTTGCGTGTTGTTGATGGTTTGTGTGTATTCACTGGATTT
TTTAAAAAATGTAAAGATCTATGTGTTTGTATTCTAACCTAAGTTTGCCTCATTACATTAAAGTTATCTGCGTAAAAAA
AAAAAAAAAAAAATAGG
>Contig100 13284 reads, 649 bases
TTTTAAACTGTGAAAAAATCAATGAACTCAAAAAAAAAAAAAAAAAATAGGGATAACAGGGTAATACTAAAATATATTT
GTACCCTTGCCTACCAAGAGTGAAAATGGCGAAGGTCGTAACTTATTTTACAAGTAAAGGGAATGCCATTCTTGGCTTT
GCCAAACCCAGGTTAAACACAGCCTGGAGATATGCTAAAGTTGAGCTTCGCCCACCTACAGTTAAAGAACTACCAGAAG
TTCAGGTGGGGATCCAAAAATTGATTGTGTCCGCTAGAACTCGTCAGTGGAGGCATCTCACTGTTAAGGAAGCATGGCT
GAACACATTGGTTGGGGCTGAGATAGTTTTTTGGTTCTTTGCTGGAGAGTGCATTGGCAAGGGAGGCATCGTTGGATAC
AACATACCTGGAGCCACAAACTGGGACATACACTTTTAACATGCCTAGGTTATTCCCCAATACTTGTGTTTGTATGAGT
GATGGACATTTCAAATCTATGAGAAATAGACTGTTGCGCAGTAGTGATGTTGTTAACCAATTTTCGAAAGAGCAAAAGT
TGTCAACTTCGATTCTTCAAAGCAAATGGACAAGAGTTGAACTGTATTAAAATTACACCATTTTAAAAAAAAAAAAAAA
AAAATAGGGATAACAGG
>Contig101 30037 reads, 1029 bases
ACTCAATATAATTATWAAAAAAAAAAAAAAAATAGGGATAACAGGGTAATATTACAGTTGAGACTATTTGCATAGCTTC
ACACAAGTGTTACAGTGTGGTGGTAACAATTCAAGAATGAAATCTTTGGTCTTTTTAATCACTGTCTCCCTGCTCGCTG
TGTCGTGTCAAGGACGACTCATCAGTCTTCAACAACTCTGCGAAACCTGCGAACTTAGTGACGTCAACTGTCAGACACT
TTGCTCGCCCCAGCTGACCATCAAGAGATCCTGTGTCTGTGGCATCAGTGACCCAAACTCAATCGAGTGCTTGACACAA
CCCATTTGTGATGGGGTTGGGAAATAACCATTCACACAGACATGTTTAAATATAGATTGTAACAATAAATGGACGGATC
TCTCATGAAAAAAAAAAAAAAAAAAATAGGGATAACAGGGTAAAAAAAAAAAAAAAAAATAGGGATAACAGGGTAATAA
TACAAACCTCGAAAAATCACCCGGAATCTTTTCTCGTTTTAATCAAAGACATCCCATTGAACCATGAACAAGCTGATCC
TCCTCGCACTTCTCGTCGCCGCAGTGGCCGCCCAGGACCCGGCCGCCCGGAAGGCCCACATCCTCTGTGTCATAGACAC
TCAGCTGTCCTCGGACGGCTGCAAGAGGACAGCCAGGTCCCAGGTCGAGGCACAGTCCGGCTCTGACCCCGCCAGCGCC
TGCGCCACGCTGGAGACCTTCCGTCCTCTTCTGGGCATCATCGGCTGCACCACCGCTGATTACGACGCTCTCCACAAGG
TCATCTGTGAGAATGACCAGACTCCTTGTACGCCCGCGGCTTAAAATTATATCCATGACAACCGAGGCACCGCGTTGAA
GTGTATTGACAATACGACGCGTCGGCCATGACGAATTTATTCACATCAAATAAATGCAATAAATTAAGAGTTTATATAT
ATATTTTTGTTAAAAAACCTAAATTAATAGTGAATTACAATAGTGAAWAAAAAAAAAAAAAAAAAAATAGGGATAACAG
GG
>Contig102 7275 reads, 631 bases
CAAAAACCTAAMAAAAAAAAAAAAAAAAATAGGGATAACAGGGTAATGTGTTTTTTCCCTGTTTAAATACCAATACTAT
ATGTATGAGTAAATCGGCCGATCAATTCAGTTTATTCACAGTAAGCAACGCACGAAAATGAAGTTCATTATTCTACTTG
TATGTGTAGCCATCTTGTGTTTGTACCAGGTATACGGTGCCGCCATACAATGTATTCCGAGTGGAATAATGTGCTTAGT
CGACCCATGCGCATTAACTCTATGCGCACCAGACTACGTCTGCACGAGCTGTAACTGTAGGGCAAGTTGTTTGATGCGC
GGCGCACTTTGAATCATCTCCCTTAGATTGAAGTTTTTACATGGGTCTGTGTTGGAACAGAGGAGAGGACCAAACAGAA
TACTGCAAAGAAAATGTGTGTGTGTGTGTGTGGGGTGAGGGAAGAGAGACAAAAGGGAGAGAGAGAGCAGCTGGAATTC
AATTAAAAACAAATTTTCAAATGAAAAAAAAAAAAAAAAAATAGGGATAACAGGGTAATTTTCATCGCCAATGCCGAAC
GCCACGGCAAGCGGCCAACCTGGGATGACCAGGTGTTCCTCTACTGGGAAGATGACAGCGGCGTGGTGCTGCAATCAT
>Contig103 35205 reads, 1778 bases
CGGCATTCCTGCTGAACCGCTMTAACAGGGTAATATTCCATCCCAGGATACGCCTTACAATAAGTTGACGTAAGTTGAC
GCCTAGACTTAAGACGGAGTTGGCGAGCGTAGTTTAGTTCCATTTCAGCATTTTCAACACCATGGACATGGCGTATAAA
TGTGTGCTACTGTTGACCGTTGGAATGGCTGTCTGTTGTACAGCATCCAAAGTTGTGATGACGACAAACCCCCAGACTA
TAATCCCAATCTTGACAAAAACTCTCAAACTCCGCTGTTCTGTGGCAAGCGAGCTGGTGCAGATCATTGGCCGCCGTGA
TGTCTATCCCATGTCTGAGACGTCTACGTCACAGGCTGACGTGTCCCACGTGACGTCCATCATTATCACGAGAATGAAC
ACGGAAACAAAAATAAACGTTACTGTGGCAACGGTGTCTTCATTCGACCCGCCCACCGCTAAAGTAGACCTGGGCAAAA
TCTCCGTCACCGGAAGCACCAACCCGACTTCCGAAGCGGATGAGAAGGGATTTTTAGAGGTCACCTGGGACCACCCCCT
GGAAGACCAAGATGGCGTCTACTTCTGCGATGTCTACGCCCTGAACGCTCTGCTACACCCCGAGTCCCTGACCGTCTCG
GCGCAGGTCAAAACTTCGGCCGCCACCCTGCCGGACCTCGTCAAGTACATCTCTGAAAACGACAGGCACATCGAGAGCC
TGCAAGCCCATGTCCGTCTGCTGGAGGATCAGATCTCCGCCCTCGAGCTGAAAGAACAAAACCAGACACAGGAGCTGTT
CTGGAACTATCAGACGATGAGTGACGACATCCGGCGTTTGGACGTCGTAACCAGAAACCTAACCGGTCAAAACATCCAA
ACCGGAAACGTCACGTGCAGCGCCAATAGTGCGACGGTTGACGTCAAGTTTCACAACAGCTACGCCTCAGTCCCCGACG
TGTTTCTCGCCCTCAATTTTATAACTAACAGCAACTACGGGTACACGATAAACCCGATAGCTGAGGTGACCACTGAAGG
GTTTCGAGCAGTCTGTACTTCGGGTTCGTCTAGCTATCCTTTCGGCATTTCTTGGATGGCTGTAGACAACTAATGATCT
CCCTTCATTATACCAATAAAAACTTCAGAAATAAAAAAAAAAAAAAAAAAAAAAAAAAAAAAAATAGGGATAACAGGGT
AATGTACTTGGGCATCCTGTACTCCAAACAACCGCGCCATGAAGATCCTGTTCGGTCTCCTCTTTGCTCTAGCACCCAT
TGTTCTGGGTCAGGTCGACATTGACGCCACTATTGATGGCGTTTTTGACGCCCTAGACTACAACTTGGATGGCAACCTC
TATAGGCCAGAGATCGATTCCTTCTTTAGGACCTACGACTTCAACCATGACACCTTCATCAACAACGCCGAGTACACCA
CCGCCGTCGATGAGAACTTCGCCCACGACCAGGATCTGACCAGGCTCTACAAGAACCTCTTCGACGTCCTGGACACCGA
CAAGGACGGTCGCATCAGCCACCACGACCTTGATGTCATCTTCGGCCGCGCCGACGGAAACAGAAACAACGTGGTGACC
AGAGCCGAATTCCATTCCTACTTCTACAGCATTGCCCTCCAGCTGCTGTTGGGTTAGACGTGTTGACGGACTGGGCCAG
TTACTTTTTATAACGAATGTAATTATTTGAATAGCACGAGATGGAAAGAAACTGATACTGATTAAAAGTCTTTTTTCTT
TTTTTTTAAAAAAAAAAAAAAAAAAAATAGGGATAACAGG
>Contig104 7272 reads, 2251 bases
ATCTACTGCCCCGGACGGTGATGCCTCCTTTTTGTTGGGCTTGAGTTTTAAGTAAGGTTTTCATTTATCGGTAACGTTT
GATGCTCGAAGTAAAGACAAAATGAAGTCTGCAGTTTTAAGTTTACTTGGGATATGTCTTTATTTGACAGTGTCTATCA
ATGCTGACGGAAAATTCTGTGCCGCTCATGCTGACTTGTACTATGCTAACATCGCTGGCAAAATTCAGGGAGGATACGA
CATGCTGTCTCTCGGTGACCAAAAGCCCTGTGCCTATCGAGCAAACAGGGACCTGAGGTACCGTGAGATTGACGGAAAA
TGCAACCACCCCAAAGATTACGGATCAACCATGAAGCCCRTCAAGCGTTACCTGAGACCACACTACCAAGATGCAGAAG
GCAAAGACGCCCCTCGTATTTACAGCGTTTTGGGTAACAGTTACCTTCCATCTCCTCGTCTCATCAGCTTGAATCTCTT
CCCTGATATTCCTAAAGTGGCCAACACCTCCATGTGGACCATGCAGTTCGGTCAGTTGATTGATCACGACATCACATCA
GCTCCAGTGCCCACAGGTCCTAATGGAACTATCAAGTGCTGTGGTSTGAAAAACATGCCTAAGGAATGCTTCCCAATAT
CCATACCAAAGGAGGATCCCAGATTTGACACTTGCATGGAGTTTGTACGATCGCAGGCAGCAGCTGATGAGAAAGGCAA
TCAGCTTTACCCCAGGGAGCAGTTGAACGCCATCACGTCTTTTGTCGATGGTTCAGCCTTCTATGGTTCCGACTCGAAT
GCCACCAAGCGGCTGAGAACTGAAAACGGAACAGGAGCTCTTTTGAAGACCGTAATCGTCAACGGGTTTGAACGTCTGC
CAAACGACACGTCCGCACGTCCCGGTTGCCTTAAGTCTCAACGCCCAGAGTCTTATTGTCTGATTACAGGCGACAGGAG
AGCTAACCTCCACCCCGGCCTCTCGTCTGCCCACTTGCTGTTCCATCTGTATCACAACTTTGTCGTCAGGAGTTTGGCC
GCAGCCATCCTAAAACAACGCGACCAGCCCTACGCCCCCACCAATGTTGAATATTTTATCGCTAACGCCCCCGCCTACC
TCAAGGAAAAACTCTTCCAGGAAGGAAAAAGAGTCATAGGTGCAATTTTCCAGAACATCGTCTTCTGCGACTACTTACC
CATCATCCTCGGGCCAAAACTTATAGAAAAGTTCAAGCTTGGCTGCATCAGGAGAAGCAAGTACAACCCATACGTCGAC
CCTAGGATAGCCAACGCTTTCATGTCCGCTGCTTTCCGTTTCGGACACACACTTGTCCCAAACTCATTTACTATCAATG
GTAAACAAGAACTCTTGAAGGACAATTTCTTGGTACCCGATGGTCACATCAACGGCTTTGAGAGTCTTTGCAAGGGATT
CCTCGAGGACGGCAAAAACGAAGCTTTTGATTGGTTCTTCAGCAAATCTATTTCCGAGCATTTGTTCGAGACCAGAACC
GGACCAAAGGGAGCCATCGACCTTCTTTCCGTGAACATCCAGAGAGCCCGTGATCACGGTATCCCAGCTTACTACTACT
GGAGACGCTTCTATGGTCTCAGACGTTTAACAAGATTCGAGGACTGGGGCAATGAAATCGGAGAGAAGTTGAGACAGTT
TTATAACCATGTTAATGACATCGACTTGTTTGTGGGTGGAGTCTTTGAACCACCAGTTGAAGGGGGCGTGGTCGGTGAG
ACTTTCGGTCACATCATCGCCAATCAATTCGCCGATCTCAAGTATGGTGACGCCTACTTCTTCCTGAGCAAAGAATACC
CCCAGGGCTTCACTGATGAGGAAATCGCCGCCATCCAGGAAGTGACCTTCAACAGCATCCTGTGTAAGAGCGCCCAACT
TCAGTACGTCCAAGACAACACATGGTTTATTCCATCTGAATCCAATCCCGTGAGGCCATGCTCCGTGCACCCACAGTTC
AACGCCGAGGTGTTCGCCAAATACTTCGACCAGCCTTACTAGAGTGCTGGATCATGTGTGATGGTGTCTCTTCACGTCA
CCTGCAGCTATGCCGCTGTAACATTGCGCGTCTGCATTTTGGACATTTTCAATGGTTTTATTTTCAATAAAGAAACAAT
CGGCCCAAAAAAAAAAAAAAAAAATAGGGATAACAGGGAAATAGCCTTGAATTGCGTCCTGTTTCTGGAATAAAAAAAC
GCCACCTGAAGTGAAAATTATTACCAGAGATTGACATGT
>Contig105 20170 reads, 904 bases
AAAAAAATATTTAGGAATACTGAGCAAAAATATATTGTGGGGGGTGGTAGGACTCCGCGTGCACGTAAACAAGTTGTGA
CACATTGCTTCCCCTGTTATCCCTATTTTTTTTTTTTTTTTTGTCAAAACTAAATAACGTATTTATTTTCAATCTCAAC
ATAAATATTATAACAATACTGTAAATTCCAAGTCACGTGGTACAGGAGGGTTCTTTGAATTCTAACCGACGACCACGCC
CTCGGCTATAGAGATCTGATCCAACTTGCAGACGTCAAATTTGAAGATCCGGTCTTCGTGCCTGTTGTCGTGGATGCTG
TCCACGCCTCTGAGCACGTAGTCGTCCGGCACCCTGTAGGTGAGCATGTTGTCGTAGGTGTTGATGTACGGGGTGTACA
CACAGCCGTGCGTCACGAAACCTTCTGGGTTACAGCACTGAAACGACCATTTTCTGTCTTCGTATCTGTTGTCATGGAT
ACTCTCTACGCCGGTGATGACGCTCTCATTCGGGCACTGGAACTCTAGGACCTCATCGAAATTGTTCTGATAGCCACTC
CACTCGCATTCACTAAGTGACACCCCATGGGGCGGGACAGAGCAACTGAAGTTCCAAACCCTGTCTTCGTGATTGTTGT
CGTGGACACTTTCCAGATGTTTCAGGGACTGACCAGGCGGACACGCGAACTGGAAGTGAGCATCAAAACTTGTCATCCA
TGTCTCCCCTTGACCGGAAGTAGCCAGGAAACCAAGGATCACGTGACTTAAGAACCAACCCCAGGCCAACATGGTATGT
TGTTGTAAACCACCAACTCCTTTTGTTAATCAAGAGATTTGACGGGCACTGATATTACCCTGTTATCCCTATTTTTTTT
TTTTTTTTTTTATTTTTTTTTTTCTATTTTTTTTT
>Contig106 6415 reads, 335 bases
AAAAAAAAAAAAAAAAAAAATAGGGATAACAGGGTAATTCAATTCAAACTCAGCTCTACCCTAGTGCGTCCAAATATTT
CCAAGTGGTCATTTTCTGAACATCTGTAGATTTAAAATGTCTCTCGGTAGCGTTGTAGCTCTCCTATCATTACTTGTGG
TGTCCCATGGAGCCATTAACCTAAACAATATTTTATTCGGTACTTGTGTGGAGATGTGTAGCAACAGCCTCATCATCCG
GGCAGTTGGTGGATTTGGTGGATGTGCTGAAGGATATGAATGTAGGTCAAATGGATGTGGGCACACGTGTCAACCTGTC
TTAGCCAAGAAAGCTGCCG
>Contig107 6771 reads, 740 bases
TCTCTGAACACTAGCAATACGGAGAACATTCTCTTTGTAAATAAATAAAAATCATACATTCAACAAAAAAAAGTTCTGA
GTTATGCTAAAGAATTTCTTAAATTACTGAATAAAAAATACATTATATATTTTGTCTTCACAAAATATTCCCTGATCGA
TAATGAAATGCCTACAATATTTTCTTTTTAAAAAGAATGTTACAGCTCATACCAAACTTGCTTTTATTCAAAAACGTAA
AATAAAAGAAAATTGTCTGGATTCATTATTACATTTAATCTGTATCACTGCCATCAGTCTTCTTATGCAGGCGCCCAAT
CTGTTTCTTGTGATGGTCAATGGCTTCCATATGCTGTCTGATTTGACGTTCGTGGTGTGCAACCTCATCTTCCAAAAGA
TCTTTAATTTTTTCAAATTGTTCCTTTTGAATTTGACGAAAGTACTGTTCTTCTCTGGCTACCTCCATTTTGCCAAAGG
AACCACCAGCCTCTCTCACAGCTCCTCCGCTGCCACCACCCTTTCCTACACCATCTCCAAGTTGACCAGAAGTCATAGC
ACGGGCTCCGATAATCCTAAAAATTGATGGTCGAAACGCAATTAATGGCAATCTTGAAGACATGTTTGTTCGTCGAAAT
TATAGACAGGAATAAGTGAAGGTCAACACTAAAATTTCGCAATTTCGTAATTTCGTAGTACATTCCCTTGCCTCAGCGA
AAAGCAGATTTCTAAAGATTAGGATAAAA
>Contig108 6709 reads, 711 bases
TTCCGATCTAAAAAAAAAAAAAATAGGGATAACAGGGTAATGTGAAAGGAAACACAGGAAGTTTGGTGAACCTGGACCT
TGTATTAATATTCAGCTAAAATCTGCTAAACTGTTGAATTCAATGATGGCTTCTTGGGTCACAGTGCTATCTATTTTGT
TGATTGTTTGTCTTGGAGACTTCTCAGCACTAGGCGCGGACACACAAGACAATGCTGCACAGCTTGTCAATGACGTGAA
TACAAAGATTGATGATTCGATTGAAACGCTGAAGCAATTTTTCCAAAGCACAAAGCGAGAAATTGGAGAGAAAGCCAAA
CGATCTTGGTGGACAAGACACAGAGACTCGATCATTCGAACCGGCGTAGAGGTTCTCCTTGGAAGAGATGTGTCGTCTG
AAGCATCACAGTATCCTGCGACAGCAGACAAATCGATTCCTGTCGGTGAAGTGAGTATCGACAAAGTGAATGGCGCCGT
TGATTTTCTTAAGAACATCGTCAACGCAGCAACAAAGTTCTCCCAGACAAAATAACAGAAATAGCTGTTAAGTCCGCCA
GAAATGTCATACTTCAACCGGAAATATAAGAAAATATAAATAATATTTATTTGCAGTGAAAAAAAAAAAAAAAAATAGG
GATAACAGGGTAATAAGTTACCTTAGTAACCATAGACAACAGAAGACAGTATTTCCCCACACAACAATGCGGGCACGCC
>Contig109 6793 reads, 724 bases
CGACGCTCTTMAAAAAAAAAAAAATAGGGATAACAGGGTAATCCTTTCCGGTCCTTTACATTTATCAACATGGCACCTA
AAGCAAAGAAACCTGCAGCCAAGCCTGCAGCAAAAGAGGAAAAGAAACCTGCAGCTAAAGAAGAAAAGAAGCCTGCAGC
TAAAGAGGTTAGCAAAAAACCAGCACCAAAGAAACCTGAAGTCAAGAAGTCTGCAGCACCCCCTAAAGTTGTTGCTGGT
GTGGTCAAGGCTAAAGAAAAGGCATTGAAAGCTAAAAAGGCAGTAGTCCGTGGCAAACATGACAAAAAGAGTCGTAAAA
TAAGAACATCTGTTCATTTTCGTAGGCCAAAGACCTTGAACCTGCAAAGGGCGCCTAAATACCCTCGCAAAAGTGTCAA
CAAAACTAATAAACTAGACCAGTATGCTTTGATTAAGTACCCACTAACCACTGAGTCAGCCATGAAGAAAATAGAAGAC
AACAACACTCTGGTCTTTATTGTTGACAAGCGTGCTAATAAACCAATGATCAAGATGGCTGTCAAGAAACTTTATGACA
TTGATGTGTCAAAAGTCAACACACTAATTAGGCCTGATTGTGAGAAAAAAGCCTACGTCCACCTAGCCTCTGACTACGA
TGCATTGGATGTTGCTAACAAGATTGGCATCATCTAATAAGTTTGTTTTATTGTAATAAATTATTCGAAAGAAAAAAAG
AAGAGCGTCGTGT
>Contig110 6781 reads, 618 bases
ATGAAGCTCAACACTAAGATTTTGAATTATGAGGTATATGTTTTTAATGTTCTTTTTGTTGGTGAAAATATCAAATTTA
TAATAAAAAAAAGAATAAAACTGTATGAGGCATGAAAAAAAAAAAAAAAAAATAGGGATAACAGGGTAATAATCTTTCC
TCGGCTCATCTTTCCACGGCTCATCTGAAGTTACCTTGAAGCACCTGTGTCACATCTATCAACCATGAAGTGCTGTCTG
ATCGCCGTGCTGGCTATCGCCATTGTCCTTTCCGCCACATCTGAGGCCGGCTACGTTCAGCCAAATGCTGGCGGCGGCA
ACAAAGGTTACGGTGGAAGTGGCGGAAACAAGGGTTACGGTGGAAATGGTGGAAACAATGGTTACGGTGGAAATGGTGG
AAACAAGGGCTACGGTGGAAATGGTGGAAACAATGGTTACGGTGGCAACAAAGGGGGATTACCAAAATACGGCTAAATT
GAGCCCAGGTCACATTCAGTCGAGTCATCTTGGACGGGATGATTTGTTGCTGGAAGTGTTTGTTTGTGTCACAGAGTAG
GACATGTAATAAAATGTGAAATGTGCAAAAAAAAAAAAAAAAAATAGGGATAACAGGGTAATAAG
>Contig111 10775 reads, 908 bases
TTACAATAAACATTACATCCTACTAAAAAAAAAAAAAAAAATAGGGATAACAGGGTAATGGTTTTTACGTGTACTGATC
CGGTGCGGCAAGACTTAGTCTATACTCTAAGACTCAATCTCAACCATGAAGACTATTTTACTAATTGCTGTTTTAGTAG
CAACAGTTGACGTATCTAGAGAAACTGTATGGACACGAGACGAAAGGAATGCCGATTTAAGCGAGCTGGTACAAGAAAT
ACAGCAAGTCGTCACTGAGCTTAGCGATGGTTCGTTCACAAGCGAGGTGATTCCCACTGTGGCTAACATCGTAGCCCAG
GCGAAGGAGTTAGAATGTGAGGCAGACGACCAAGACGACCAAGCACAAATTGATGCCATACTCTCACGTGTTCTTGACG
CGATAAAGAATCACGAAAAATCTGGCAAACTAGCGACCTTTGCCGTGGAGTTAAATCGTGCATTCTTCCTGTGGACTGG
GCTAGCCGATTACTTGGTTTATGTCAATGCTACCGGTGACACGGTGCTTCTCTGTGAGAGTCTGGTAGCGGTGAGAGCG
TCTGGACAGACAATTCTAGATAAACTCACAAACTTGGGTGAGACCTACATTTCATTTGACCTTGAAGACAACCTTGAGA
CCTCTAGCTCAGAGAGGTCAAGGCGAGACTTCTGTATAGGAGCTAAGATCGATCACTTCTGTGCCGGACTGGGTTGGAA
ACGATCATTGAGAGGAGTCAGAGACTTGTTCGCTGATCTCTAGCCAATACCACCAAGGGACGTGACCCACGACTCAGAA
CATGGACATGTAGCTGGACTCAACTTTGGAGGATTTCAATTGTACGGCAATGTTAAAATCTAAAATAAATCAATTCGTG
CGGAACAAAAAAAAAAAAAAAAAAAAAAGGGATAACAGG
>Contig112 11665 reads, 1029 bases
TTAAACTGTTGTGCATCTGTAAAAAAAWTRTAATACGACTCACTATAGGCTAGGGATAACAGGGTAATATAACTCGCGC
ATGCGTATTAGGGTATGTCTCCTTCGTTTTCACCTCTAGGTTGGCCATTGGAGCTGAATAGGTTCTTCGACCTAAACCA
AAGTTAAACATGTATGCTTGTGCAAAGTTCGCCCAGCCCACAGCCAGATGTCTGAGCATCCTTAGTCGCTCAGCCTTGA
GGCCATTGGGGAGTACAGTCGTTCTTAAGACAGAGCAACAGCCAAGTGTAAGTTTATCTGGTTACAGTGGTATCAGTGC
CCTAAGTCTAGCAGCCAAATCCCCCAGCGTTTCATCACTTATTAACCAGATCCGATCTTTCCAAACTAGTGCTGTTCAA
CGGGATATTGATCAGGCTGCAAAATACATTGGAGCTGGTGCTGCCACAGTAGGTGTCGCCGGATCAGGGGCTGGAATTG
GCAGCGTCTTCGGAAGTCTTGTTATTGGATATGCTCGTAACCCATCATTGAAAGGACAGCTGTTCTCCTTTGCTATTTT
GGGATTTGCCCTCTCTGAAGCTATGGGTCTGTTCTGCCTCATGATGGCCTTCCTGCTCCTGTTTGCATTTTAACAAGAT
ACTGAAATGCATAGAATACAAATTTCATTTTGTTAATAAAACATAAAACAAAATTAATTAGTGATTGAACTTATATGAT
ATACAAATGTTTGGCAGTATGTGTGTGCATGAGGAGAGACCAAGGTTTTTCTATACATGAAATATGAATATTTAACTAC
AGACTCGTGCATAGACCAAAAGAAGTTGTGGACATTTGCTTGTTAGTGGGCCACTTGATTTATTAGTGTTGGGGCAGGT
TAATTGTGCTTGTTGCCAGTTTATGAGTTATAGTTATCAGTTGTGAATTTAAAAAAAAATTAAACAAAATAAACTTTAA
GCACGTGACAGTATAAACTGCTTACGAGACTATAACTTTGTATGTGACTGACTGGCAGAYCGKACAGAGCGTCGTGTAG
GG
>Contig113 15196 reads, 1816 bases
GTTGACGTGGCCCCGGTACAAGAAAGTGATATATACAAGGAAGACAGAGATAAGGTAWTGTTTTTACTCCAGACACCGC
GGAGACACCACTAGCCAAAAGAGCTAGACTTCAAGGTTTGTCCAAGGCCTGTCGCAATTCGTTCGGAGCTGATTTGTTT
GTGGCCGAGCAGCTAGCCGGAGTCTCACTAGACATGATGTGGCGGACGTTGATTTTTGCTGTCATGGTGGTGGTGGTGG
AGATGAAAACCTTAGAACCAGAAGAGCAAATAGAAAAACGTGCTGTTGTATGTTATGACAATTATGGATGTTTTGCCTC
AGAAGGACCTTTTGGTACCAGTGCTGAAAGGCCCTTTGTTCTGACTCCACAATCACCTGACAAAGTCGGCGTGGTGTAC
AAACTGTACACACGAGAGTACAAGACCACGTCCCAAGACTTACAGGCCATCCATGTCAGCAATGCTGCAACAACACTGT
CCCACTTCAAGGCTAGACCAACCAAGATCCTGGTCCACGGATTCATGGACAACCCAGCACTGACCAGCTGGCAGAAGAA
CCTCAAAGACGAGTACCTGAAGTTTGATGACTATAACGTCATCATTGTGGACTGGTCCAAGGGCAACCTGCCACCGTAC
ACCCAGGCGACAGCCAACACAAGAATTGTTGGGGCGGGTATTTCCTTGTTGGTCAAGGAGCTCATAAAAACTAAAGGAG
TTACGGCTGCAGACTTCCACATCATTGGTCACAGTCTTGGTTCACATATTTCTGGTTATGCTGGTGAGAGGATTCCAGG
CCTGGGCAGAATAACAGGTCTTGACCCCGCTGGTCCATATTTTGAGAATACCGATCCAGTAGTAAGACTTGACCCCTCT
GATGCTGTCTTTGTTGACGCCATACACTCTGATGGAGAATCCTTGCTTCAATTGGGTCTGGGAATGAAACAAGCCGTAG
GTCACCTTGACTTCTATCCTAACTTGGGACGCGACCAGCCTGGTTGTACCAGAAATCCCTTCTCGAACATCGCTGAGTG
GGGACTTATCCAAGGCACTACCGAGGTCGTTGCTTGCAATCACTTTAGAAGTGTTCACTTTTTCACTGAAAGCGTCAAC
TCGCCATGTCCTTTTATGGGATACGCCTGCAACAATGAAGCTGACTTCTCTAGTGGTAAATGCAACGAGTGCGGCACCA
CCGGTTGCGCCTACATGGGGGCTCATGCAGACAGAAGCATACCTCCAAGAAATTCACACAGACAGATCTTCATGTCTAC
AGCAGCACACCAGCCATTCTGTCAATTCCACATGGACATCACCGTAAAGCTAGCATCAGCAACTGGTCAGATTGAAAGA
GGGGAACTATACGCCGTCTTCACTGGTGAGAAGGGAACAACTTCTAAGATTCAACTAACAAGCAGCGCTATAGACTTCA
ACGTCGGCAGCGTTCACCACTTCAATGTGGCCACGCCATCAGATATAGGCAACATCCGGTCAGTGACTCTGTCCTTCCA
CCACGTAGCTCCCCTACTGAACCCCTTCCAGTGGAACATCCTGGGACTGAGAGACCCGAAGCTCTTCATTGATGAGATC
GATGTTGACAGACAGGAGGCAAATGTCAAGTCTCGTCTATGTGGCAGCGGTATCTCTGTTGAAACAGACACGTCTATAG
TTCTAAACAAGAGCTGTTAGGCCGTAATATTGTCAACTAGTCAGCTAACAAAGTGAGAATGTTAATGCAAATCAGATGT
AAATGTTTCAAATGATGACAATAAAATATGTATAGCACAGAAAAAAAAAAAAAAAAATAGGGATAACAGGGTAATAAG
>Contig114 29188 reads, 749 bases
TGGCATTCTAGGTAAAAAAAAAAAAAAAAAAAAAATAGGGATAACAGGGTAATATTTCATTTCTGTTTATCGAAATCAT
CGAGTCTGCGATCTCAGGAGCATCAGACAAAAGACAAAAGACATGTTTCTCCTCTACGCCATCTTCTTGGTCCCGGCCT
TGACCTCCGCTCAGGAGCCAATCAACTTGAAGCCGTACAACCTGACGGCGACAGCCATGTTCTTGAATGTCGATAAAAA
TGTCGACGGCGACATTGACAGGACCGAACTTGACAGAAGCTTTGATCAATACGACGCCAACCACAACGGCCGCGTCAGC
AGACTTGAATACACCAGCTATGTTGACGCACAGTTGCCACAACTCCACGCCCTCTCGCACGGCCTTTACGACATCTACG
ACTTGGACAACGATGACCAGCTTGACCACCACGACTTCGACAACTTCTACCAGCTGATGGATGGTGACGGCAACGGACT
GGTCAGCCACTTCGAATATGTCCGTTATTGGTCTATTCTGTTTACTGACTTGGAGCACCTCCACACTAAGAAATAAAAC
AAGCGTGCGTGTCCTCCTTATTAAAACGAGGTGGAACCACCAAACAGACGGGTGGACATAAGTATAATGGGATTTTAAA
AAAAAACTCTTTCCAGAATTTATTTTAAATGAGGCCAGAGCAGCTTTGAAAGAAAATGGACTGCATCCATTTTAAATAA
AATAAAGATGCTTATTAAGCAAAAAAAAAAAAAAAAAT
>Contig115 10942 reads, 720 bases
AAAAAAATAGGGATAACAGGGTAATATATTTTTGAGCTGGGACATCTTTGTTGTGTTCCATTCAACCATATTACCACTT
AGGACATCTGTGTTGTGTTTATTGGCTGAAAGATGTTGCACAGCAGCACGATGATGGTAGCATTGCTCTTGCTCTCATG
TGTCAGCTGTATCAATGCTATCATAACGGGTGAACGGTTACCCCCTGAAGAAAGCGGCGGACAACAAAGATGGCTGACC
TTCAAGCTTCCCAAGGTTTACAAAAACTGTAAACGGGACGAAATTATAAACCAGATCCTGATAACCAGCACACCAGACA
ATGATACAGTCGTGACGGTCAACTGTCAGAGGGCCCTTTACAAACTGGACAGTCAGCCTAGAATGGCCAGAATAGTATT
TGACCTGGTCTTCGGCGAAGAGCACAGGTGTCCAGCTTCCATGGTCATCGCGGGGCTGTACCTCGAGCCCAAGGGTTAC
TTGAGACTAGTTAGCGAGATCAGCTGTGTCCAGCTGCTCACATTGCCACACGACTGCGACTGGACTCACTTCCGTATAT
TCCAAGACGCGTTTGAGCTGAACCCGTCGTCTGCACTGACTGGCATCAAGTTTAGGAAGGGCCGGCTAGAATTTAAAGT
TTGTAAAATTTAAAACTCACTGAAATTAAACTTCCTAACTTCAGGACCTCTTCTTGTAAAAAAAAAAAAAAAAATAGGG
ATAACAGGG
>Contig116 16184 reads, 615 bases
GTAATTATAGGCTAGGGGTAATAAGTTTTTAACTGATTGTCCGTGTACCCTGGTAAAGACACAATGGCGACGAGTCAAA
GGAGTCTCAAGCTTGCCCTTCAAACTTATCAAAGATTTTTCGCCTCGAAGGCTGGTACTGCTGGTCATGGCCATGGGGA
ATCTTCTAAAACATGGAGGAATGCCTTTTACATACTTGGATTCCCTACTGTAGCTTTGGTTTACTGGAATGCATTCCAC
TTGATGCCACAACACCCAGAGCGACAAGAGTTTGTTGCATATCCCCATTTGCACATTAGAAATAGGCCCTTCCCATGGG
GAGATGGTGACCATTCCCTGTTTCACAACCCTTACTACAATGCAACATCAAAGGGCTATGATGAGGGATCAGAAGAACT
CCATCCTGGAGCCCACCACCACTAGATGATTAGGACACTATTTAGGACACTACATTCTGTGTGCCCAGCACTGAGCTTT
ATTTGTCTTTGATAGCTCACTACATAGAGTGATATGTAGTGTTATTTTTTTAAAACCATTAAAATGATTAGTGAAATGA
AAAAAAAAAAAAAATAGGGATAACAGGGAGATACTGTGCCTGGTATACTTGTATTAATCAAT
>Contig117 10581 reads, 495 bases
GGATAACAGGGTAATTTTAGTTTCATATCGTCTGGGGTCTCTCCTTGCAACCATCCTATTGTTGGGACTTCAACTTCTT
CGAAAGACGACAAATTCTACTTCTGCTCAAATGGAGAAGACGGGAACGAAAGCTCTGCTTCTAGCGTTGATCATCGTCT
GGTCTTTGATCTTTACCAGTGTTGAGGGACTTCCGCCAGGTCGCATAACCAGATCGCCCCCCGTGAGAGGCGTATATGA
CGATTGCCGTTACTTTGGACACTGCAGGACTGCTGCTGACTGCAAAGAGCCCTTCACCGGGTACGTGTACAGGAGCTGT
GTGACTGGCTGCTGTATGTACGCCGTGGAGTGAGTCGGACGTCCTCACAGCTTGACACAGCCAGCTTGACCTCTTCAGG
CATGTGGGAATAGTTCAACGTTGGACCAGAAACACAACCAGAAATAAAGATATAAATGTTCACAACTTAAAAAAAAAAA
AAAAAAATAGGGATAACAGGG
>Contig118 11294 reads, 895 bases
CCGATCTGTTTAAATTAAACAAAAATCAAATTTATTGTGGGACAAAGCAATAACATTTCTTATTTTAGTGAAGCAAAAG
ATTTAATGTCATTATTTATGTACACAAAAGCTTTAACAATAACTAGTTTCCTAGACTGTATCAATCTTTGATTTGTCCT
CAGTTGGAAAAAAAAAAAATCACTACTATTCTTGCTCTCCATCAAAATCAGATCATGTAAAGTAAAAGTCAATTTTGGG
CCAGCAGCAGCAATGCCTGGTGCTAAGTTACCAACTTTGGACTTTGATGTCTAAATAAAGTTCATGTTGACTAATTTGA
GGCAGTCTGCTTCAGTTTGTGATTGTGACAGGAACTGTGAAGCATGTGATGTCATCAGATCCAGACAACAGTTCCCACT
TGACAACCAACGTAATCTGAGGGTACGCCGGTTGAACAAAGATTGCATTCTTGTAAACAGAAGAGCTGCCCTGATTGAT
GGGACACGTCATAAAGTGACATGCGTCAGAATCAGGGATAGGAAAAGGTACAAGGACACCTGCTATGTCACCGTGGACT
GATGTCAGTGCTGACGTTATGGCATTGTTTGCTTGGAAATTGATTGTTACAGTAACGTTGGTGTTCTTCTTAAATGGAC
ACGGTATTGATGGGCACGGCGTGATGTCCACTTGGGTGATGGTCCCCAGCTTTGAACCACAATCTTTCACGGGCACAAT
ATCGGCGTATGTGAAACCGATCATTACCACTGCGACACACAGAGCGCTCACAGAATTCATTGTCACAGATGGATCTTCT
CAACTTTCCTGGCGAATCAAACAGATGATGTTAGCTTAATTTGTCCCGAGTGTTTGCACGCAGCCCACCTTGCTGTTAC
CCTGTTATCCCTATTTTTTTTTTTTT
>Contig119 11510 reads, 796 bases
CCTGCTGAACCGCTCTTCCGATYTTTTTTTTTTTCTATGTTACCAACTTGCAGGTTTGGTATAATTTTATTTACTGCAT
AGTTTTACAATTTAATTCCTCGGGACTCACAAATCACAAAATTAAAAACTGCGTACAAAGTTCCTGCTTTCTGAACCTG
TATGATTTCAGCCGACGATGGAAGTCTGGCTCAAGCAGCGGTCCCCAGTAAATGGCGGTATACAGCTGCAGACGTTATG
GTCCATACAAAGTCCTCCATGGGAACAAGGCGGGTAGCATTCAGAGACACACTTAGGTGTGTAGGGTGTCACCGTGTAA
CCGTAAACAACGTTGCAGACGAACTCGTAAGACACAGCCATGGAGCCCTCAAAATCGTAATCGTATTCACACATATGCA
AACACTTGATTTCCAACCTGGAATCGTTGACATAACGACAGTAAATCAAACCATTTCTTAGAGGTGGAGGCAGTGGACA
ATTAGGTGACCAATCGCCTTCAACAACAGCGATGTTCTCACAGTACGCGTTGTGGTTCGGATCAGGACAAATGCAAGTG
TTGAACTGTGTGCACGTGCCGCCATTCATGCATGGCGGGTTACAGATGGCTCCCGTTACTATTATTTCGGCTGTTGTTG
AAATTACTTGAGTATGATCTGGAATACAATTGGGCACCAAATAAATGTCTGGTGTCCAGATTCCGTTGTCGTCACAGAC
GTAGAAGTTCGGCGGCGGCCTCTCAAACGTGAAGTTGGGCAGATTACCCTGTTATCCCTATTTTTTTTTTTTTTTNNGA
AGTTTT
>Contig120 5333 reads, 734 bases
CAAGTACAATGTTATGAGATAAAAAGGAAAATTTTATTCACAATATCAAAAGACTGATGACTCATTAAATAGTACATGA
AATGAAACCACTGAATTGACCAGCCACACTTCTCTAGAGCAGTTCTGTCTAAGGGATTGCTACTATAAAAACAGTCTTT
AGATGAAAAGGAATGACATGATTCAACTTTCCATTACCAAACATTAGTTCAAATTGATTCCAAAGCACTGCTTCGGAGC
TCTAAGCCATGTCTTAAATCCTTTATCTTAGTTTTACACAAAATATACACAAAGTAGTTCTTTTGATAGTAAACAAATG
TTTGATGTTATCATTTTTGACTGGCAAGACAAATCCTTTAGTCAAACTGTTCTTTATTCTTCAGTAAGTATGCTGCTAG
AAACTCAATAGGATTAGGTGGCCGTTCCCTGGCCAGGACTGACATGCCCGAAAGCAGGATTGGAACTACTGTCTGATCT
AAGTATGTTCTAGTAGGAAGGGATTGGAGGTCAACTTTTGGTCTTTTGTTGGGAGCATCATAAGCTTCTTTCTCACTGG
TTATTATTTTCTGGATATTTTCTGGAACATCCTGTGACTCCACAGCATCAGTAGCTATCAATCCACCGGCACTGACAGG
CCTTGATACAGATTCATCCGCCATGTTTCTTGTTTCCAAGGGAAGTGATTACCCTGTTATCCCTATTTTTTTTTTTTTN
TTTTTGCTTCATTTTTTTTTTTT
>Contig121 11637 reads, 472 bases
AAAAAAAAAAAAAAAAAATAGGGATAACAGGGTAATAAGTCAAGTCAAGAGATAAGACATAGACACTTTGCCACTAGAT
CTGTGACAGTAGCAAGTCAATCAATACAATATGCTGTTTAAATTGAGTTGTGTCTTTCTCTTCAGTGTCTGCCTGAATG
TCTCTGTGCAGCAAAGACCGGACTTGTGCAGTCTGGCGCCAGTGACAGGCCTGTGTGAGGCGTACATACCCAGTTACTA
CTACAATCCCGCCTATGGATCATGCCTGGAGTTCATCTATGGCGGCTGTGGTGGCAACCAAAACCGTTTCAGAACAGCA
GCCGAATGCAACACTGTCTGTCAGTCACAAGGCGCGGTCTAGCTAACCATCACACCAACTGAATCAACACATAAATATA
TGGACAGATCCTAGAAATAAACAAATCTTCCAAACACAAAAAAAAAAAAAAAAAAATAGGGATAACAGGGTAATAAG
>Contig122 6415 reads, 507 bases
CGCTCTTCCRADGGTTGAAACCCTAGCTTACTTTTACTTAAACAAATCATCTGATTATATGCGCGTTACATTTTTTGGT
GCAGTACAGTTTTAGAGGACAACACGCGCAATGCATAAAGTGAAACTTTTGACGTTGTTGTTGATATACTTAATATTCA
ATGCCCCACAAGCACGGGGCGGTGTGGTGAGGGACCGTTCCTCCTGTTCCGTGCCCTCTGTAACGTGCGATGAGGACCC
CTGTAAGGTTCAGACGTGCATCTCCTTCCCCATGGCGGACTGTCAGCCCAACTACTGCGGCGGATGCTGGGCGGATTTT
TACTTCAACGGCGAGCGAGTGGATGATTACATGTGTACAAATATAATCATATAATCATGTCGACTGTTGCTTGTGACCA
TTAAACAGCCACCGTTGCGTTAAAATAATAATGACTTATAAACATGGCACCATGTCCAGTGTTGTATAGGAATAACTGT
CCAAGGAAATGTCATTACAATTTTAAAGAAAAA
>Contig123 16681 reads, 783 bases
AAAATGTGCATACTTTCAAMAAAAAAAAAAAATAGGGATAACAGGGTAATACACACACAAACATATCCTAGACCAGAGA
ACTAGCTCCGAAACAAACCAACAATGAAGTTCCTCGTATTTGCCGTTTCAACACTTGCCGCAGTTCTTGCCGTCAGGGA
CCCAACAACAGTCTGCACGCCAGACATGTATGAAATCAGTTTTTACGACTTCAACAGCAATGATTATGGAATGGCAGCA
TTAGACTACACCAAAAATATGAGCGCCGTGACCTTCATGAAATCGGGCCTTCGGGCTGTGTACGATTTAACTGCAATGA
AAGGCTATTTGATCGCTGGTACTGGAGTATGCACGACCTTTGCCATGGACCCTGTCCAGGTCGTAGTCAAATGCTTGCC
AGCAACGGCTAAACCAATAACCAACATGACAGTGATGATCGGAATGGCCGACAAAGGTGGAATAAACATCGTGTCTTAC
GATGTCCCCCTCACAGCGACGGACATCGTTAGAGTTGCCTTCACTGACACGACTCCCGCATTTCCAGTTCTCAGAGAAC
TTATCGGCTCAAAAAGTACAGTCACAGGAGATGTTCTTTTCTTCACCAACCCAGTGGTGTCCACTACCTCGTCATCCAT
GCTGACCATACCCTCGATGTGTACACCAACTATGCCCGTTGGTTAGGTTAATTTTCATTAATATTTTCAATTTTTTAAC
GATTTGAGTCATTTTTTTTTAATAAACACTTTTTTGTTATTAAATGTTTTGTGTTTATTAATTAGGAAGCSA
>Contig124 24207 reads, 763 bases
AAAAAAAAAAAAAAAAAAATAGGGATTCAATCCCGAAATATTCGTTACCTGGCCTTATTGGAATACACAGAGCCTTGCA
GCTGTTACCTTAATTAATTAGTCTAACAAAATGGCAGACAATCAAGAAGACATTACAACATCTTTGGCCGAAGTAGCCC
TAAATGAAACAACCAAGACTGAAGAAGCGACCGAGACGGTGAGCCAAGAAAATCAACCAGAAGATGTCGTAGTCAATGC
CCCGTCAGAGGAGGCCACTGACAATGTCTCATCAACTGAAGCCGCAGTACCTGAGTCATCAGATGACACCGCAGTGCCT
GAGTCAACAGATGACACCGCAGTGCCTGAGTCATCAGATGACACCGCAGTGCCTGAGTCATCAAATGACACCGCGGTGC
CTGAGTCAGCAGATACAGTCGACAGCAAGGAGACACCAGAAGCTGATAATCAAAGTAATCAACAAGATAACGAGAGTCA
GGCAACTGATTCATCCGTAACACCAGAGGCACCAGAGGCAGAGAGCCAGTAGTCAGCAAATGATAATCAAACGCCAGTC
TCACCAAAGGACCAATGATGTTTGAGGACACAACAACTTGACGAGGTGCATGGCGGAATGCATTTAGTTTATTTTAAAA
AAATAGAAATTAGTCGCCTATGATTTCAATTGAATAAAAAATAATGTGTCCCATCAAAAAAATAAATAGGGATAACAGG
GTAATAATTAGGCCTGATTGTGAGAAAAAAGCCTACGTCCACCTAGCCTCTG
>Contig125 12033 reads, 794 bases
TTTTTTTGTAGGCAATGAATAAATGAGCTTCAAATGWRAAAAAAAAAAAAAAATAGGGATAACAGGGTAATAAAGTCAT
CAACTCTGGGTCTTCAGAATCAACGACTGATTTTTTTCAGATCTTCACGTAGATTTTAACACAAGGAAAATGATGCTCC
AAGTATTGATCGTAACTGCAGCTTTGTTGGCGACAATGGAAGGGGCTTCCATAGTCAAGCGAGCGGCTGGTGATAGCTG
CAATGTGAATAATGGCACTTACCCTAGTGGACAGGAATTTTCACTGCCAGGTTTCCCACCTTGCATTAAGTACTTTTGT
AAAGATGGAGTGTTTTCACTCTCCAAAGAAGGATGTGGAGTACTTGAGAATGGTCAAACCGTGTGCCACGACGTCAACT
CCTCCTGGCCAAAAGGTTGCAACACAATGACCTGCAGCAAGGGACTCAAGAATGGCATCACCACTTACACCACGACAAC
CACGGCTACACAATGCGCTGATGCCAATGGCGTCTGCTTCAACCCCGGACAAACCTTTTCATTGGTCATTGAAAATACA
ACATACACCAACTGCACATGCGCCATCGTGGACAACGTCACGCGCTACTCGTGTTTCGCTAACGCACCCGCATAGTAAG
CCGATCCGTTGAGCCGGCTATGGTTGAGAATCAATGTTGGTTCATAGACCAAGATGTGAGCTTGTAAGATTATCATAAA
AAGTAGACCAAGTAATTGGTCTGAAATAAATAGTTAAATTCTTTAAAAAAAAAAAAAAAAAATAGGGATAACAGGGTAA
TAAG
>Contig126 8556 reads, 511 bases
CTCAAAAAAAAATAGGGATAACAGGGTAATTCTTTTTTTCGTTCTTGGCCGCTGTAAGAAGTTGGTTTCATCCTCAGTC
ATTTGAGAAAGAAACTCATTACAATGAAATCTTGGATTGCGTTGTTTCTGATTGGCTCAGTCGTGGTGGCTGCTGCTAA
CGCCGCCTACATTCATTCCTGGTCCTGCACAGTTGATGGCATCGATTACGAGAATGGAGATATCGTCCCAGTGTCACAA
GACCCCGAGTGCTGGGTGTGTCGCTGTATCAAAGGAGAAAACAGATCCGGCATCTTGTGCGCCAACAAGTATTGCCCAG
AAAAGGGACCAGGCAAGTAACAGTCATCCACTAAAAAGAAAATTATTTGATTTTCTTATATCACATTTAGGATTCGAGC
TCTTTACAGAAAGCTTTTAGTATGCAAGTCTCTAAATTAGACTTCAAAACTTTTTTTAAAATTTCAATAAATATTCGTA
TACTCAAAAAAAAAAAAAAAAAWTAGGGATAACAGGG
>Contig127 6600 reads, 676 bases
AATATTTTGAAAAATACAATTATATAATATAATTTGATCAAACACAATAACCAATGATCCAGAAGATGTAATCTGTTCA
CTTTTTATAACATCACTGAAATTGATGGTTTATTTCATTTTTTTTCTTGTTTCTTTTCTTTTCAAAGTAAACTCTTCGA
AAAGTCGTCGTTTTTCTGATTTTATTCAACATTTGGTGCTTACTTAACTTTAGAAAGTTTTTAAATTTTGATATTTATT
TAATCACAATTTATGATAAAATCGAAGTGTGATAAGTCAAACAAAAGCTCCATAAAACCTTAGGCTGTTGAGTTTAGGT
AATAACAGGAGTGAGGTCCGTGGTACAGTGGCGAGGTATCATCCAGGTATTCAGTTAGTCAAACATTCTCATCATCATG
AGTTGTCGCCAGAACATGCTGGGGTCGTACATCATTGGGCTCTGTTGTTGGGGCATCATCCCTACAGGTTGTGAGATGA
CGACATTGAGGACAAGGATCATCACACAGACCAATAGAAGCAGGAGTCTCAACATTTTTACTGTTTATTTCTTTAAGTT
CGCTGGCGAAATGTTATTGTAGGTCAGTTGAAATTTCTGGTTCAGATTTTATTGACTTCAGGTAGATGATAGCTGTTAC
TATTACCCTGTTATCCCTATTTTTTTTTTTTTTTTTTTTTTTTT
>Contig128 8485 reads, 602 bases
CTGTTATCCCTATTTTTTTTTTTTTTTTTGACAAATAGTAATTCTATTTGGGCAGGGGGGGGATGTTGTTAATATTTCA
ATGTTTTTCTTGTAGTCTAGAGAGTGGTTATTTGAAGCCAGCCAATGTTTTTCTTGTAGTCTCGACAGTGGTTATTTGA
AGCCAAGCACTGTTTTTCTTGTAGTCTAGAGAGTGGTTATTTGAAGCCAGCCTTTTTAAACATCGTTTCCCAAAACGAG
TCGGCCAGGTACCGAACTGGTGAAAACATCTGCCTAAGAGTGCAATGATTGATGCCCAAAGCCGCTGCCGCCCCTGACA
TGAACTCTCCAGCCTCCTCCAAGACAGCATCTGCCAAGCAACACGAGACAGCAACAACAACCAACACGATCCAGATATG
CGGTCGCGCCATCTCGGAATATCTTGTTATACGGACGCAACACTTGCTAACTGAAAGACACTCGACCAACAGTCCGTGA
TTCAACACAAAAATGTGCTGCTCCCTGCTTGTATATATGAGGTTTAAAAACCACCAGTGATGGATGGCATCACGTGATC
GTTGGATGTTTCAGGTTGACAATATTACCCTGTTATCCCTATTTTTTTT
>Contig129 10126 reads, 514 bases
CGCCCTTGAAACCAGTCGTCCACCATGGGAGCCTGTACCACCTGGTCGCCCGGACTAAGCGATCGCCAGACTGTCAGAT
TATAACTTCACCTGACACGGCACTGAAAATGTTGCGCGCCAAGCTACTCATCTTGACCTATTTTTGTTTGGTGTGTCTC
GCCCTAGCTGCAGCAGATTTCCCATCGCTCATCGCCAAGTTCCTGGACTGCACGTCTAATGTCCGCACTGACTGCACCC
TACAGGACCCCGACGACTGTGACGACCCAGCCATGCAGATTGGTTGCGCCAATTTCTGCAAGAGTTGCCCCTCGTGATG
AGGACAACATGTGGGAAGTCTTCGCAATAAGACAGTGAAGGCTTATTTCTAAAAGATTATTTGTAAATTTGTACCGCTC
TTTAGCAACGAAACTATTTTGTGTATTCCATGAGTCATTAAATAATAGTAAAATTTAAAAAAAAAAAAAAAAAATAGGG
ATAACAGGGTAAAAAGAAACTGACCAAGTTTGTAATGTGC
>Contig130 7614 reads, 781 bases
GAGATCCAACAAGAGAAAGATCACCCTGTTATCCCTATTTTTTTTTTTTTTTTTTTCAGAGTGTATCAATGTAATTTGT
GTACTCTCTTTATGTGTGAATTAGCAAAATAAACGCTACCCAACAACAATACTAGCAAGCCTATCTAATTTGCACACAA
TGAAACGATATCGGTGGTCTCCAGAGGTGCTATAATATTCTGTGTGAACACCACGCAGTGCGTAGCCGTCGGGTACACG
ATAGTTGAAAGGGCTGTATTCATTGTTGAGTAGCTCAGTCTGGTAGCAACCATGGGCAGCATAATCTCCTGGTGTGCAG
CATTGAAAACTGTACAATCTGGAGCTGTCGGAGTAAAATTCTGACTGAATTCCAGTCACGATAGCTTCATTGTGACATT
GGTAGCTAAAAGAAGCATACCAATTATTGACAAAACCACTCCACTCACAATCTGTTAGTGCCACAGGGAATGATGTTGA
TGGATTAGAACAAGTGAATGTCCATTGACGGTCATAGTTATTAGCGGAATAGCTATATCCGATGCTGCTAAGACTTTTA
AAAGTTTGATTTTTGGGACAAGAGAACGACCAGTCTGCTAGACTAATTGACACCCAATCAGCTTGTACGAAACTCTGTG
GGTATTGAACGAAGATGATGAGATAAATTGACAGAACCTTTCTCCACATCGCTTTTGAATATACTGAGCTGGTCTCGAC
TCTGCAATTCTGTTGATTTGGGATCAAATGCAGGATACTATAACCCTTACCCTGTTATCCCTATTTTTTT
>Contig131 11599 reads, 1115 bases
AAAAAAAATAAGGGTAATTTGTGGTTTCTGTTTACTTTGGACACGCTGCGGTTCTCTACAGCCATGAAGTCTGTCGTCA
TAGTTGTTGGTTTGTTTTTTGTGGCCTACGGTGCAGCCCAAACTTTGCCACCAAGATACAATGATGTTCTGGCAGCATT
GGCCTCCACCGGTCAGTTTACTGTCTTTACCGACTTGCTGAAGAAATCTGGACTTCTGCCTCTAGTGAATAGCTCTCTC
CATTTCACAGTATTTGCCCCCACCGATGCTGCCTTTGCAAGACTCACTGCGGACGCCTTGGATGCCATCAGGAATGACC
CGGCCAAACTGGCTGACGTCATCGGCACTCACATTGTGTTAACGACCAATCTCCGTTTGGGGAGCACGCAGCAGGACTA
TACAATAGGGTCGTACAACCATCACCAGATCAGAATTAACACCTACAACATTGTGCATACCGTGACGGCGGACGGTGTC
AACGTGACCATCAGAAACATTCCCGTCCTCCACGGGACAGTCCACGGACTCGATGGCGTCCTCGTACCGCCCTCGTCCA
GCACGGCGCAGCTCAGCTTCAGCCGAGGAGACCTGAGCAATTTCACGTCTCTGCTCGTCAGCGCCAACCTGCTCAACTT
TTACACAGCCGATAAGGACGTTACCTTGTTCCTGCCCAACAACGACGCTTTCAAGAGCTTGTCCCCCAGTGTCCTCGCT
TATCTACAAAGCCATCCTGCTGACCTGGCTGAAACACTTAAATACCACATTGTTCGAACTGCGACCATCTTCAGCCTTG
GTTTGAAGCACAGTTTGACCCTGACCTCGGCTGACAATTATCACGACCAGTTGATAATTTTGGAAGATGAAGCCGGTGG
TATTTCCGTCAACGCAGCCAAGATCGTGCAGAAGGACATCATAGCCACTGACGGGGTCATCCACATCATCAACAAGGTG
CTCATTCCACCCCTTGTGGCAGTCCACATTACCGACAGCGGCATTGTTGTTGGATGAACTGATGGACCAGCTTAAATGA
AGTTAAAGTTTTAAACGTGATAATAATTTATTCAACTGTGTCATCGAACATCTTTATAAAAAAAAAAAAAAAAATAGGG
ATAACAGGG
>Contig132 11053 reads, 898 bases
ATCTACACTCTTTCCCTACACGACGCTCTTCCGATCTAGCAACTGCAGGCTTGACTTCTTGAAACGTGTCAAGAGAAAT
GAAGCACTAAAGAAACTGGCCAAGGAGAAGGGTATTCCAGCCCTTACTAAGAGAGTGCCTGCCCAACCCAGGAAAGCCC
ATTTTGTCAGCACCAAACTTGTCAAGCCAGAGTTCCTCACACCAATTCCTTATGAGATCATTGCTTAAATGCTGAATAA
ATTACACAACTATTTGTGAAAAAAAAAAAAAAAAATAGGGATAACAGGGTAATAGTGCACATTGCACATGCTCTAGGAG
AAAGACGTTACTAGGTGACAAATTCAACAGGCATGAATATACTACTTCCTCTCGTAGCCTTACTGTGTGCCAATTCTGT
CCAAGGAATGATGGGCACGGGCATGATGGACATGATGGGCATGATGGACATGATGGGGATGATGGACATGATGGGGATG
AACACGGGCATGGGTTCCCTGATTCACAAGGAAGTTCAGGCCTTGAAAGCGCAAAACGCTGAGCTGACAGTAGAAGAGT
GTGCAGACAAATGTGACGCTTCGTTTGATCTCAGTGACCCAACAGACGAGGCCCATGCTGACCTCATGTGTCTGAGCAT
ATGTCAATGTGAAATCCAAAATATTTGTGGTGGCCATAGTGCCACCCACACAAGTTCCACCCACCAACCCAGTACAACC
CACGACCAACCCAGTACCACACAGCTCGCGATTGGACGTTAAGAAAGACAGACCCCGACTACGGCAAAAGAAAGACACC
GTCCACACCGCGGTGACCATACTGTCCATTGGAATAGGTCAATGATTAATGTGAATTAAAACAGTCATTTCATTCTCAA
AAAAAAAAAAAAAAATAGGGATAACAGGG
>Contig133 4561 reads, 642 bases
GAGATCTACACTCTTTCCCTACACGACGCTCTTCCGAAAAAAAAAAAATAGGGATAACAGGGTAATAATTATTCATTCG
ACATTGAAGGTTATGCAGTCATGAGTGGAATTATCACACACATCGCTACAGTCTGGCTCATCTTCAACTTTCTTGGAGC
ACATGCTCAGCAAATAACAGCTCGGTTTGACTATGGGGATTGTTTCGGCTCAATTGGTACTTGCAACACTTTTGACGTG
GATGATGCTGACACCTGTGATGTCGCCTGTAAAGATTTAGGTTACCACTTTGGAGTCTGTGTCGTGGCCCCTCCTTCTC
AATGCCCGGGACGACATCCGCGTTACAGATGTCAGTGCAGGCGTGTGGCGCCGCAGAATTAGAAGGATCATGCTTTCAA
GAGGATGAAACAAGAGAATAATGTTTTGAGTCACTTGGCTATGTAAATAAATTTTATTTTTATTTTTTTGTAGAACATA
CTCTCTCTCTCTGTCTCTTTGTATATTAATATGTCTCTATATCTCTAAAAACTATAGAGCTTAATCGATGTTATGTCAC
ATGTCCAATAGTTAATGATCTAAATACAAGAATATTTGTTAAATCAATTTTTTTTGTGACTTGTACACCATTTTATTGT
ATTATAAAAG
>Contig134 23825 reads, 650 bases
CCCTGTTATCCCTATTTTTTTTTTTTTTTTTTGACGCTTTATATTCAGTATATTTTTTATTAGCCTGCATGACAAAATA
AGAAACACAGCTGATCTTTATTTTTCTGTTTCTTCACAATTCTCAGGCGCGGCACGTTTTTGCGTGTGGTCATCTAACT
GTTCGGGGTCAAATTGGCCAAACCCATGACAACATTGCCCAGGCCCAGGGTGGCACCGTCCAGCCCACTCTTGACCACA
TCGGTCAGCTGATTGACGGCGCCCCCGACGATGTCCGTCGTCTTGTCCACCAAGGTGTCCACCAGACCGGTCAGCGTGT
TGGTGACGGTCCCCAGCCCAAGGGCGGTGCCCACCCCGGTGGCGGCCTGTCCCAGGAGGTTGGTGCTGGTGTCGATGCC
GTCCCCGATGGCGTTGACCACGTTGTGGATGATGGTGTTGATGTTGTCCAGAAAGAGTAGCCTCTTGGTCGGCGCGGCG
CTGACAGCACAGACCACTGTGAGGGTGAGGAGGATCACTGGGGTAAACTTCATCTTTGTTGGTATCTTGACCAGAAATA
ATCCAGAACTGACATTACCCTTTACCCTATTTTTTTTTTTTTTTTTTTTTTTTTACCCTGTTATCCCTAGCCTATAGTG
AGKCGTATTACAAACGGT
>Contig135 14243 reads, 1262 bases
CTATAGGCTAGGGATAACAGGGTAATTAGNCTAGGGATAACAGGGAAAAAAAAAAAAAAAAATAGGGATAACAGGGTAA
TCTTTTTTTCTCAACAAGTCCCCTGAACTGCAAGCATCTAGGAACCAAATCAAATCATGAAATACGCTTGTCTGCTTTC
GGCCGTTTGCGCCGCCATTTTGCTGTCTGTCATTGAAGCTTCAGATAAAAAAGATGCTGTCCAGTGGCAGTCAGTCAAA
GTCAATGAAACTGTCACAGCAGAGGTAACACTGGACATTCTGGTCAAGAACTATGACGCTTCCGGTGACCTCCATGGCA
CACTCCGCATCGCACTCTTTGGTGAGACCGTCCCAATGACAGTACTCAACTTCTTCAGCATCTGTAACGGCGTCAAGCG
GCCTTCTGGTGAACTGAAGTACGCCAACACTTACTGTCATAGACTCATCAAGGATTTGAACTTCCAGTGCGGCGACACC
ACAACCGGTGATGGCTCAGGAGGTATCAGCATGTACGGAGACACATTTAACGATGAGAACTTCCAGATCGGCATCAGTG
AGAAAGGGACAATAGCCATGGCCAACAGGGGACCCAACACCAACGGTTCTCAATTCTTCGTCACCTTCAGGAGCTGGCA
GTTCCTTGACAACTTACACGTTGCCTTCGGTCAAGTCATCGGCAAAGAATCATTGGAGTTCCTGGACAAGCTTGCTGAG
GTCGACGTTGAAGACAATGGCATCACCCCCAAGAAGAAGATCAAGATTGTGGACTGCGAGGCCAAGGACGTCAAGAAAT
ACAAGATTCAAAGACGTGCGTCCATCAATGACGACAAATTCTAGACATTTTTAACAATTCTTACAACATAACTAGACTG
TCAAACAAATTTTACATCTGTCTGATATAATTTTTTTAACTAAAAGTAAACATACGTGTACTGTCAACTGTCATCGCTG
TGCGTTTTTGTGTGGGGGCGTGTCTGCAGTTGTCCTGTTCATGGGGTAAGTCACAAGATGATGTTAGCTGGGATTGCTG
ATTTAATGAAACCACGCCCATCAACCCTGTGATTGGATGGTGTGAATTGTGTGAATGTAGAAAGTTGTGATGTAATGAA
AAAGTCCACCAATGCGAGAGCTTTCAACGGCTCCTATTTATAATCACCAATAAAGATGATCTACCTTGAAAAAAAAAAA
AAAAAATAGGGATAACAGGGCGAATATCTGCTTAACAGGTTTTTCGCGTATGATCCCGAAAAGCGTATTACAGCAGA
>Contig136 6383 reads, 714 bases
ACGTACTCCAACCGAGCGCGTATGCCACTCGACCTCCCTGTTATCCCTATTTTTTTTTTTTTTTTTACAACACTGCATT
GATTTATTCAGACTCTTGTTAATTTAAAAAGTTGTATGTGGCCTGCTTGCAGTAAAACGCGGAGCATGAAGTTTCCTGT
GGACTCTGTGGGTCAATGGGAACTTGATGTGGTAATCATGAAACTGCTTTGTGTTTGGTCTTCTGCATTTGCTGGCTGC
AATTTCTTCTACCTTGATAATGTGAATAGAATGAGCTCTAGCTCTGTGGCGCGCTCCCATGTCACGGTAGCACTGCGTT
ACAGCTTTGCCTGAAGTCAAGTCTCGGTACTCCCGGTACATGTTGTGTGTGCCACTTCGGGAATTATAACGAAGCCAGA
TTCCAAAGTTCTTAATCTTCAAGGGCTTCTTCTCCATGACCCGACTACAGCTGACAATCTCGCCAGTTGCTTTTTTCAG
CTTCCTCAACTGACTCAAGAAATACCAAAATCTACTCTTTGCAACAGCTTTATCTGGAGCAAAGATTCTCATCTGATAC
AGGGCAGGGGTCCTGTTCTTTTCAGAAGGCAGGCCTCTGCCAATTACCTTGTATTCTTGCAACTCTCCCTTCGCCTTCA
TGGTGCTGAATCCACAGCGGAAAAAAGATTACCCTGTTATCCCTATTTTTTTTTTYTTTGTTCAGATAATTTAATGTTT
TTT
>Contig137 4283 reads, 272 bases
GTTTGTAAATTTCAAAAAAAAAAAAAAAAATAGGGATAACAGGGTAATAATCAGACAATCATTCAGAGATTAGAAGATC
ACACATCCACGACCCCACTAACAACGATGAGGATCCTGTGTTTCTTGGCCCTGATTTGTGCCTGCCTGACCTTCACCTT
GGCCGACAATATTGACTGCATACAAGGAGTGGCAGCCTGCGCCAACCATCCATTAGTTTCACAAGAAAATGGAGAGACG
TATTGCTGTCCAAGATCGGAAGAGCGTCGTGTAGG
>Contig138 11818 reads, 755 bases
AAAAAAAAAAAAAAATAGGGATAACAGGGTAATCTTATCCCTTATCTCGGCACCATTTAAAGAAGCAAAGCATGATAAT
CGTTTGTTTCATTCGAAAAAGTTGCTAGTCACTCAAAGATCACAAGAACCATGCGTTATTTAATAGTTGCCTGTCTCTT
CGCCTTGGCTTCGGCCCAGCTTGGCGCCAACTGGTTGCAAAACTTCCAGAACTGGTTCAACACCAACAAGAATGACTAC
AGCATCGACTTCGTACATAACTACAGGTTTGAGGAGCACGATACCAGCGCCGGTTATCACCTGCTTGTTGCCATCAGTG
ACACGGCAACAGATAAAGCGTGCCACCTGATCGAAGTGACTCCGGACTGGGAGAAGGACTTGGAGGACATCAACAAAGT
TCACGTCATCTCTGAAGAAATCTACCACCTGATCTCTACACACACTCTCCGCGAGTCGAACTTAAGTTACGATGACCTC
AGGAACATCTATGGGGACTCTGATGCTCTAAGGGAATGTGTCCAGCACAGAGTCTACATGGTCAACTACAAACCCAGTT
ACCTGAATGCACTGGGATAACGCAGATTATAGATACAGATTTATAAAAGAAATTGTTTGAATAATTTGAATAGTTAGAC
AAGGCCATGTGCCGTTGGAGATTCATAATTTGTTATAATGGGAAAATATTCCATTTACAACTGTTAAAATAAAGGTTTT
TATTTGTTTAATAAATAAACGAATTGTTTGAACAACAAAAAAAA
>Contig139 11550 reads, 713 bases
AAAAAAAAAAAAAAAATAGGGATAACAGGGTAATCTTCCTTTTTCAGTGTTGCACCTTCTACCATGAGTACCCTTCGCC
TCCAGAAGCGTTTGGCTTCAAAGGTGCTCAAATGTGGTAAAAACAAAATTTGGTTGGATCCCAACGAAACCAATGAAAT
AGCCAATGCTAATTCACGTCAAAATATAAGGAAACTAGTTAAGGATGGTTTGATTATCCGAAAGCCTGTGAAGGTCCAT
TCCCGAGCTCGAGTTCGCAAAAATGCAGAGGCTCGCCGTAAAGGACGACACATGGGTCATGGCAAAAGAAAAGGTACTG
CAAATGCTCGTATGCCTACAAAGATTCTGTGGATCAGGAGGATGAGGGTTCTACGCAGACTACTTAGGAAGTATCGAGA
GGCTAAAAAAATTGATAAGCACTTATACCATGAGCTGTACATGAAGTGCAAAGGTAATGGATTCAAGAACAAGAGAGTT
CTCATGGAGTTCATTCATAAGAGAAAGGCAGAGAAGGCCAGATCCAAACTGCTAAGTGACCAAGCTGAGGCTCGCAGAC
AGAAAGTCAAAGAGGCTCGTCGCCGTCGTGAGGAGCGCATTGCCCTAAAGAAGGAAGAACTGTTGAAAAATATTGAAGA
GCCTAAAAAATGAGTTAATTAAATCTGAATTTTATGTCACTTTAAAAAAAAAAAAAAAAATAGGGATAACAGGGTAATA
AG
>Contig140 10067 reads, 517 bases
TATAATATCCCTATTTTTTTTTTTTTTTAGACCAAAAATAACGACTTTTATTACGTGATAACGATGTGTTTGTTTTACA
TAAAAAGACTGTGCGAAAACAGAACATGTTTATCCGGAAGTCAACCTCTGATTGGTCAGCCGGGGAGATACAGACACTG
ACCACCGTCCACAAAATCGAGTGTAATACAAGTCATGAGGCTTCCACAACCACACTTCCCCAAAGAGTGACCACTGGGG
GTACAAGGATCCCCTCCTCTCACACTAGCCTTACACAGACCCCAAGAGCCGTCCGTTCCAGCATCCTTGTTGTGGATGC
AGCATTCTCCAGCGCCACAATCGTTGTGTTCGTCACAGGGGTTGTTGACATTCCCCATGCAGCTACACACTACACACGC
CGTGATCAATGAAAGTAACCATGTTGACGCCATTTTAACTGGTTGTAGACTAAGTTGTCCTCAGACAAATAGTTAAGCG
TAAGAGATTACCCTGTTAACCCTATTTTTTTTTTTTTTTTTTT
>Contig141 13341 reads, 569 bases
GCATTTMAAAAAAAAAAAAAAAAAATAGGGATAACAGGGTAATTCTTGTCAATCAGCTAACCAACACACTGACCATGTA
CAAGATTCTCATCTGCTGTCTAGCCATCTTTGCCAGCACTCACGCGCTGGTCGGCAAAGTTTGTACGACAGAGAAGGAA
TGTGATGAAGGCGAATGTTGTCAAATTCTCAGCGAGTTCCTCATCATGAGCAAGAGACAAATAGCAATACTACCTACAT
CTACCCCTAAGACAGGTACCTGCCAGAAGTACAAACTCGAGGGCGACTCGTGTAGCGTGTTTGAGCGGATGAACGGCCA
CTGCAGCTGTGAGCCAGGCACCACGTGCCACACCTACGAGGTCCCCCTCCCCACGGCCAATGGGGCCAGGTCGATGGTG
ATGCCCCGCCCCGGTTATCAGTGGATCTCAAAATGTGAAAAGCCAGCGGCTTAATTTGCAGTCGTCAGTGCATTAGTAA
AACACTTGTGATATGTTTGTTAAAATAAAACAATCCAAAGCAGAAAAAAAAAAAAAAAAATAGGGATAACAGGGGAATT
ATTATTATTATTTTTT
>Contig142 2959 reads, 820 bases
GCTGATAAAGCATCCAGTTGTAATAACTATGCTACATGAGCGTATGGCCATGGTTATAATTCTTGCGTGAACACATAGA
CATGATACAATAACTACCTACTTAAGGATACAATTATTAATGAACACATAACCAGTGTGACAACTACATGAACAAGGAT
ACAATAACTACATGAACAAGGATACAATAATTACATGAGTCAACGCTAAAAACTTACTGCCATAAATAACTACATGAAC
TATACCTAAGAGTAAAATAATTACATGAGCACGCAGCCAACGCTACAATAAATACATGAACTTGCTCACCCAATGGTAC
AATAATTGCATGAGCACGCAGCCAACGCTACAATAAATACACGAACTTGCTCACCCAATAATTCCATGAGCACATAGCC
AGACGTACAATAGCTACTGCTCTACTACCACTACTTGTACTTAACGTTCAGCCCGGTATTAAATACTATACTATATTGT
TTCATTATTAAAAAACCAATGATACATCGACTGCTCTGCTTCCCAAACAGGGGCCAGAGGTCGATAAACCTATCCAACA
AAACACGGGAGTTCATATAGTCCATTCTGTGCATGTTGAGCTATGTGAAGGCAAACATTCATGGCATGGGTAACGTCTT
ATCACAGACAACTGGTACTGAATAAATATTGACATTTACCTTTGTGTAGTTACCATTTATGAACTAACTGCAATTGTTA
TTGTTCAGGATTCTCAACTAATGATTTTTTTTTAAATTCACTTTGGTGTGCTTTTCTGCTTATTTAAATGGATTAATAA
ACATTTTCAGTTAACAAAAAAAAAAAAAAT
>Contig143 8480 reads, 795 bases
GACGCTCTTCCGAAAGCAGAAATAAACTGTGTATCAGAGGGGCTTTCCAAACTGTAACAGATTATCGGTTAGACTTGGC
GACTCTCTCCAACTCATCTTTCTTCTTTATAGCATGGGAGTTTGATGAACCCTTAGCAGCATTGATCAACTCATCAGCC
AAACATTCAGCAATGGTCTTGATATTTCTGAATGATGCTTCACGAGCTCCAGTGCACAATAACCATATAGCCTGGTTGA
CACGTCTGAGAGGTGAGACGTCAACAGCTTGACGACGGACAGTACCAGCACGACCAATGCGAGTGGAATCTTCACGAGG
TCCACTGTTGATGATGGCATTCACAAGGATTTGTAGTGGGTTCTCTCCAGTCAGTAAAAAGATGATCTCAAAGCTGTGC
TTGACAATTCGCACAGCCATTAGCTTCTTGCCATTATTACGACCATGCATCATAAGACTGCAGGCCAATCGCTCAACAA
TGGGGCACATAGCTTTGCGAAAGCGTTTAACTTGGTAACGGCCAGCTGAGTGAGGCAAATATTTGGCATACTTTTCTTT
AACAGCAATGTAATCAGTTAAGCTGATATCGCTGACTTGGACATCATCAGTTGACCACTTTCCAAAGAGTTTCACTTCT
GGTAGTTCTGCAACTGTTGCAGTTCCTACTACTGTTGTTTCCTCTGGGGACCAATTTTCTTCTGTAGCAGCCATGACTG
ATACTAAACAGTTTTAGCTTTACGATCACGGCTCAAAAAGGAAACACACGTGGGGATCCACTTCCTACTTTGCACGGAG
TTCAT
>Contig144 16471 reads, 841 bases
CCACTTTGTGCACTATTAACTTTTCGATCGACTGGCTTATTACCCTGTTATCCCTATTTTTTTTTTTTTTTTTTTTGAC
TCTAGAAACATTTATTATACAAATGTTACCATAAATCAATAAATTTTTTCAGATGGGCCCATGGTGCTCTTTATGTAGA
GGGCTCTTACATTTTGCCAATTTTTCTTCAACAGAGAGACAAGGAAGTTGATGGCCAATGTAATGTTCTGGTACAACTC
CTCAGAATTCATGTTAACATGACCAACACACACGGCCAAGCACAATACCTTCTTCATCTGAAACTTGATAGTGGCTTTT
GTCTCCTCCACCTTAGCGTTAAGGCTGTCATTATGTGTGATTGGGGCTGGAAATTTGCCTGCTTTGTTAAGGCCCGGGC
CCAAAACTCTGGGAATCTGACGAATGAGGGACTCAGAGGCTAGAAAAGCATCATACTTTTTGGCTAGTTTCTTCACAAG
CTTCTTGTCCTTGTTAAGTTTTTTAAGTGCTTCAATGTCCATGTGAGGCAAATCGTTAGCCTTAGCCTGATCACAGTGA
ACCTGGTCACCAAGAACGCATACCTTCATCTTGGGCTTTGGGATGTTACGCAATTTGATGGTTCCAGCAAAACGCTTGT
CCTTCTGGGGGTCATAGTTCTTCAGTGCAATTTGAAGTTCAATGGACTCTGTAAACTTCCGCTTCTTTGTCTCATTGGC
ATACTTGAGAACATTGTCAATAGACTCACGAAGGGAATCTCTGTTGATTTTACTCATCTTGGTGGAGTTTCAACGTAGA
AAAAGATTACCCTGTTATCCCTATTTTTTTTTTTTTTTTTTTTTTTTTTTT
>Contig145 5592 reads, 559 bases
TTTTTTYWCTTTGTTTAAATACATCTGGCCTTTCAAGACATGTCAAGAAGGGTAACAGGTATACGTTTATTGAAGACAG
CACCCATATTTAGTTAAAAATATTTATTCAAAATAAGCATGCCAGTTATACCTGGCTTCTCTCTCTGTGATGACGCCAT
TTGCATTCTCATCAAAAAGTTTGAAAATATGAGGGAAATCCAGAGAGTTTAGATGCTCGTCGGCAATCCTGTCCAGTTC
AATGAAATAAAGGGGAGCGTTTTGTGGATTTGGGAATCCCTGTTGCCCCCAACCGATATCGAATTCCTGTTTGCTCACA
CTACCGTCAGTGTTTTCATCAAGGTGTAGCCAAAATCTGTCAAACTCATTTCTTTGGAGCACATTATCAACACCAGCGT
ATTGAAGAAACAAGTTGTCAAAGTTGACGCTTCCTGTCTGGGCTGAGGATGGATTAAAGGAGACTACTGCGAGAAAAAC
TAGGACTATCATGATCTAATGTAATGCTTCTTCTGAGGACTGTAACGTATTTTATTACCCTGTTATCCCTATTTTTTTT
TTTTTT
>Contig146 10427 reads, 541 bases
GGGWAACAAAAAAAGCTAGGGATAACAGGGTAATCTTTTTCTGATTTCCGGTCATCAAGATGAAGCTTGAGCTTTGCTC
TTACAGTGGGTACAAAATTTATCCAGGCCATGGCAAACGCCTGGTTAAAGCTGATGGCAGGACATTCTATTTCTTAAGC
CACAAATGTGAGCGCTCACATACAATGAAGCGCAATCCTCGTAATATCAACTGGACTGTGCTCTATCGTAGAAAGCACA
AGAAGGGCCAGATAGATGAGATCGCAAAGAGAAGAACTCGTCGCACTCAAAAGTTCCAAAGAGCTATTACTGGGGCAAC
ACTTACCGATATAATGGCTAAGAGAAACCAGAAACCTGAAGTCCGTAAAGCTCAACGAGAAAATGCAATCAGAGCTGCC
AAAGAAAAAGTTAAGGTTAAAGAAGCTCAAAAGAAGACTGTTAAACCTGCTCCTGCTAAACAAGCCAAGCAAACCAAGG
CCCCCAAACAGCCTGCTACAAAAGCCCCTCGTGTTGGTGGAAAGAGATAARRGATARAGKGWAAGAK
>Contig147 16633 reads, 617 bases
CCACCTTGACCAACAGGTAAAACACACGGNNCTNCTNACATGTCNTCGRAACGTCACAGATTACCCTGTTATCCCTATT
TTTTTTTTTTTTTTTTTGTGATCTTATTTATTAATCTTATAAAGAAAATACAAATTTGTCCTCAATAAAAATGTTCCTT
AATAATTCAAACACCGCCATTCAAATTATACCTTTAAATGGATATTACCATTTATTCAAGAAAACCCCGCCATGCTTAA
TCGGTGCGTCGACCAATGTTTTGATGTTGACAGAGAACTGCACATTCAGTGGTCCTGGGAAGGTCAGTGGGTCAGGTCC
TATGACCAGCTGGGACAGGTTGGCCAGATCCTTGGTAGGGTTGCCACAGTTGACGTAATTGTAGGTCTTCAGGCCGGGA
ACTTTGCGTAACGCCGATTTGTCAGGTTTGCCCATGAGCAGGTCAAACAACATACGCTGAGCCTCTATCTCATTGTAAC
GGACCTTACACTCCCCGACAGTGGACAGCACGATGACCACTATGGCGGCTAGACTGCAGACGGCAAACTTCATGTTGAA
AGGCTGGCAGAGTTGTATTACCCTGTTATCCCTATTTTTTTTTTTTTTTTTTTTTTGGSTTCAT
>Contig148 8706 reads, 649 bases
AAAAAAAATAGGGATAACAGGGTAATAATTTTACAACCACTATTTCTTGCCACTTTAGTGTTATAAACTTTTCAGAGAT
TCTCCAACAACGTTTGTCCTCTAAACGTTGAAATGACTCGCAATACATTTTACACCTTATGCCTGGTGACCTTGACATT
TGTTTTGATGACGTCAGCACAACCCGTAGAACCAGAAGTGGAATCGAGGCCCGTACCGTCCTGCGTAAAAGATTTCTGC
GTCGACAGAGGTGACAACAACTACCGCCACTGTGACTCGCAGCAGTGCCTAAACGGAGTCTACATCAGCTGCTCAAACG
GAAACGCCTACGTCATGCCATGTCCAGCAAATCTGTTTTTCCACGAAGCATTAAACAGTTGTGAATACACACCAGACTG
TGGTGATTTAGAGTTAGCACAATAATGGCTACTGTTGGGACACAGACAACACAAAGTTATTAAAGAAGCCATCATTTGA
ATTTACCATATTCGTTCTATTTTCATGGCAAAAATATATTTTTTTAAAATTGTTTTATACAGAAATAAAGAAAGAAGTC
AAGAAACTTGTAGATTTCCTGTAACGTTAGAGTACATTTGAAGTAGTGTTAAATAAAAAAGAAACTCGATTAAAGCTTT
CAAAAAAAAAAAAAAAA
>Contig149 13287 reads, 1410 bases
ACGTTACTGAAAGAAGAGTAAGCAAGGAAAGCTTCCTTTCCGCTTTTCCAACAGTTATAGACTSGCCWTCTTTTTATCT
CCCTGTTATCCCTATTTTTTTTTTTTTTTTTTGAGCTGTTAATGTGATTTATTTCGAGTAATTTCTAGTGATTAAACAA
AGTTCAATAATTTAAGCCTAACAAACGAAAGAGTAAGATCACAATTGTCGCAATGAGTTGCGGTTCACAGGTGAACCGA
TCAGTGTGTCACCAACAGGTAAGCCGAGTCGTCACTACCAGGTGTCACAATTGAGAGCTTGGGGGTGGCAGTCCTGGAA
GGCCTTGTTGGCCTTGACATTGGCACACGCGTTGGCCTCAGATTTACAGGAAGCCTTGAGACAGTCCAGGAAAACTGGG
AAGACGTCGACCTTGACGGAGTTGGTCAGACACCTGCGTTCCCGGGTGCTCAGCAGCAGATGGCCACAGCGGGACAGGG
CGCTGGCCTTGTCACTACAGGAATTGAACACGCTGGAGACCGCTGCACATGATGGTCCGTAGTTTTTGGGGTTAAATTT
TTCCTTATCGTCAACACTGTCGTAACCACTGATCATGGAAGCGAGGAGCTTTTCTTCTGTGCTGCTGTAAGGGGCTACC
AGCAGGTCCGGGCCTTGATTGCAAACATCTTCAGCCAGGTCAGAGCCAATGGTTTCTGGTGGTGTTATCACACAAATTC
CTGGCTCCAAGCTCTGTTTAATCTCCGAGTGGTTGGGAGGTCTGTAGACGATTTCAACACCGCAAGCCTTCATTAAGGT
GATGTTGCGGACGCTGTCAAACTCCATGGCAAGGTTTATGCCGTACATCTTGGTCTTGTCAAAGATCTTACTCTCGGAG
ATCGTGTGAGTAACGTTGGAAACCTTTGGCTCCAAATACTTGTTGGCGTCGATGAATATAAAACCTCTCAGGACGGAGT
CACCGTAGGCGATATCCACCCTGACCCGGTCGTTGTACACGTTACCGTTATCCTCGTATGGCCCAGCTGTGCTGACTCG
CACCTCACAGATCTGTCCGTTGATCTCCTTCCTAATCAGGGCAATGTTGGTGGAGCAGGGGAAGCTGACCTTAGAGACC
AGGTCATGGGCGGTGTTCAGGATGGGGTCACCTCTCAGAAAACAGACGCCTAGATTCGAGTCTCTGCAACAGAGTGTGC
CGTGTCCCTTCTGACCTGCGTCGCAGCGGCACCTGTTGTCAGCTGCAGTGTAATTTGCCCCAGACACGCATCTCTCAGG
ACCGGAGAGGACAGCGGATATTTGTCCCACCATCAGGACAGTGGTCAGCAGAAGAACGCTCAACAACATTCTCAGCACA
GTTTATGTCAGATCAGCAGAACTTGCCAATTAGTAGGAGAGCCTGGAATTCTCAAAGTGCATTACCC
>Contig150 16015 reads, 809 bases
AAAAAAAAAAAAAGAATTTTAAAAGAAAAAAAAAAAAAAAAAAAAATAGGGATAACAGGGTAATGTGTTTCTCTAGACT
AGAAGCTTTTCGACGGGCATAAACTACCAGTACCAGGGAGATTAATTTTGTCAGTCTGACCATAATTTGCACCGACATC
CGATACCATGAGGACTTTGTTGGCTTTAGCTTTCATGTTGTTTGCAACCGCCCACGTCTCCCAAAGTCTCCCAGCCCTT
GGGTCGTGTACCCTCGGCATCGTCAATTGTTTTGTTGAACCTTGTCGGTTCTCAAAATGTTCAGTGGAGGGTGCAACGT
GCGGTGACGACTACTGTGGCGGATGCTTCGCCCGTTGGTACCTCGGTGGCAAGGAGGTGACCAGCCAGTGTGCGGCTGC
AGCTGAGGCTTAAAAATAGTCACGTGGTATGACTTGAGCTGTAACACATTCGTTTGAGGATCCCTGCAACATTCGACAG
CAAGACTGTTTTTTTAAAAAGGCACATTCAATGTGTAGACAAAATAGTTTAATAAACTTCAGATTATATTTCAATGGAA
AAAAAAAAAAAAAAATAGGGATAACAGGGCGTGGAAAAGCTGGATCAGAGTCCTCTAATCCACAAGAAACAACCCAAAA
ACCAAAACAAAAATTAACTACGCAGAACCCATTGCCAAAAACAACCAAAGCGAAAGTGCAAAAAAATTCAAAAACGTCT
CTGGTTGCCAAGGATAACACAACTGTTCCCCCCAACGTAATCAGCACATTCACAACAGCTGGCAKATCGGAAGAGCGTC
GTGTAGGGAAAGAGTGTAG
>Contig151 9528 reads, 538 bases
TACCCTGTTATCCCTATTTTTTTTTTTTTTTTTTAATGAATGACATCTTTAATTTTATTTTCCAATCATGACACTCGAT
GAATGAATCACTTTAAGACAGGCCTGCATCTGAAACGCGTCTCTCCTGGAAGCAGTTGACCCAAGGCCGTGGATGCAGT
TGTCATGGAATCAGCAAAATCATGGCACTCTAAGCCAGGTCCACACCGGCATGGTCCTGTTTCTGTACAACCTTGACCT
TCGGAACTGAACTTTTGGCATATACCCATTATGGGCTCAATCTGTATAATAATGTCATCCAGGTTTCTCTTTACGGTAG
GAGCCTGGCAACACTCATCCTCTCCGCAGCCCGATGACCAGAAGCATGACTTACCAACCAATCCGTTGGTTGCTGCAAG
CAGAGTGACCAAGACGAAGGGAATTGTAAACATTCTATTGCTTCAGCTACTATGACGATCACTTCATTACCCTGTTATC
CCTAGCCTATAGTGAGTCGTATTACAATTAAAACTAGAAGGCAATTGTTATTACCCTGTTATCC
>Contig152 11404 reads, 742 bases
CTGGAATCTAGTCTGTGATTTAACAGTCTATGCTATAAATATAAGCTTACAAATACGTATCACGTGCTCGCTCGTGACT
CCAATGAGAAAGTCCCTGGGACTTCCGTTCAAACTTATAAAAACTTGGAACAGCACACAGCCGGGTAACATACGTCATC
TGACATCTGTTACGATCACGCTGCCACCATGCTGACCTTTGTGTACCTAGCTGCCGCCGTCTGCACGGCTTCTGCCTTT
CTTCGCTACCAAGGGGCCATACCTAACGGAGACATCGTCCCTGACCCTTGTCGTATCGGTGACTGGCCAGGCGTTGGAC
ATTTTTCTTCCAATGGAGCCGGAGCTCGTAATGAATTTGGATTGGATTTTGCAGCGGCTGGTCACGTTTGGACCCAAGC
CTTATGTAACAGAGACTCGGACAGGGATGGGAGGACCAATGGTCAAGAGCTGGGTGACCCCACATGTCGCTGGACACCG
ACCTCCACTATAAGTTTAGCTGCACCCACGACACACCCAGGTATCTGTGAGCCAATAGGAAGTAGCGCATGCGCATGGC
AAGCTTTCTCGTGCGCATAAACCCTGAACTTCTTGTTTCATACATTTTTAAAAGGCTGCAAGGTCTTTCAAGGTCCAAG
CAGGTGCCAAGATGACGTCACAATGATGTTGGAGGAAGGTGCTGATATCTATTTTCAAGTTGAAATAAAAAATATAAAA
ACGCAAAAAAAAAAAAAAAATAGGGATAACA
>Contig153 5991 reads, 383 bases
TACACGACGCTCTTCCGAGGATAACAGGGTAATGGTCTATAATCAATATTAGTTGTACCGAAAACTTACTGATGCAGGA
AGATGCATACCGTACTTCTCATTACGCTGGCCGCCTGTTTCCTGTCTGGTCAAGTGAAGTCTGATCGTCGTTGTATGGA
GGCACAGGTCCATTGTACAGAGCCCTATAAGAAGTGCGTAGCGTCACTTTTAGATGGTGAAACAGACTTTAAATGCATG
ATGGATCGTTTATGGTGTAGTAATTGTGAACTTAGTGGAACATGATGACACGAACTTGTTGCCGTGACGTATTATAGTA
CACATTTTAAGCCTAGCTGAAAACAAACGACACTGATATTAAACTTAACTGGCACAAAGGTTCAGCA
>Contig154 8439 reads, 541 bases
ACAACAAAACACCCAYWWAAAAATATTAATTTGTTTTAATTTATTTTACACTVGGAAAACTCTCAGACTAATGTGGTCG
AAACGAACACTCATTTGAAACCTTAAAAACATTTCATTTTCAAACATGTATGATTCAGTCAGATGTCTTGCTGTCCTTT
CAATCTCATGTCAGTGCAACACATTATTCTGATTCAGCAGAAACACCCCCGGGATTCTTGTAGTGCTTGATGTTGGCCA
TAATCCAGAACATTGGTGAAACTATCACAACACACATGCTTCCCCCAACTGCAAGCTTTGTCGTAAAGGGAATTTGATA
TCTCGGGGGACCTGAAATCATCGTCGCTTTCTGTGTGACATTAGAACGTAGTGTTGGAACCACTTTGTTCAAAGTACAT
CTGAGAACTCCGGACATTTTTTGGCTTTTTCGTAAATATCGCAAAGTAAATTTACGAGGTCAAACGAAAGGACTTGTAG
GTGAACGCCTATGAACCAGGTAATTGATTACCCTGTTATCCCTAGCCTATAGTGAGTTKTATTACAA
>Contig155 6739 reads, 404 bases
CCCTGTTATCCCTATTTTTTTTTTTTTTTTTAGTGATACAAGAATCAAAAAAATATATTTTATTTAACTTTGGCAATGA
AGTAGGAGTCTCACGGCAATTTTATGCTTGTCTCAATCTTCTTTGAACACCATGAACTTTATCTCAGTCCTCTCCCTTT
TCATCAGTCTCTTCAATGACGTCACTTTCTACTTTAGCAGATACATGGAGCCCTGATACACACACATTGAGGGACGATG
GCCAAAGGAATAGCACTAGCCACAGCAGCCAATACACAGACAGCTGCCACCACAAGAACTACTTTGATGGAAAAGTTCA
TTTTTGCGGACTGGCGGGAGATTGGTAGAGAGTGTTGGATGGTCCTTTAGAAAGTTTAGTTCACAATGGTTTTATTACC
CTGGTATDG
>Contig156 10679 reads, 746 bases
CTATGAGGTCCCGTGCCCAAAAAAAAAAAAAAAAAATAGGGATAACAGGGTAATAATCCTTTGTCAACTCTTTGCACAT
GTGTCTCTGTGATCATCAAAACTGAGAGCCAGCTGATCTGCTGCAGTGTCCTCATCGTTTCACTTTAGTTGGTGCCACG
GCTCAAGGAACATACTTCAATTGAAAAAGATTACAATGGCCAGACTGGTGGGCGTGTTCATTGGCATCGTCCTGTCGTC
GATGGGTTTTGTTCTTCACATCGTTGGTCTAGCCACGCCCAAGTGGGAAGTGGACCATGACAAGGATGCCCATTCTGGA
CTGTGGCAAAGGTGCACAACCACCTTGTGCGAACACCTCTCTGTACCGCATACACCAGTTTGGCTACATGTCTGTAAAG
CCTTCGCACTGCTGGGTGTAGCAGCTGGTCTGATGACCATTGTTTCTTCAATCTGTCATGGAATCTACTTGACCAGCAA
AGTGTGCAGAGATGTCCGTAAGGTCCCAGTCGTTCTGGGCGTGATCACTTTTGCATGCGTCATCACCAGCGTATGTGTG
TTCGGACTCCACCTTACAAGCTCCATCGGATTCTCGCTGATCATCGACTTCATCGGTGGATTCCTGGTGTTCGTTGGAG
CTGTCATCGTCACGGCGTTTGGGAAGTCCAAGATCTCTGACAACGATTTGGTCACTCTGGTCAGCAGTCCCTACTAGAG
AACAATAAACCCCTGACATCTCTCCTGAAAAAAAA
>Contig157 12682 reads, 617 bases
AGAGCTGACGTTCGCAGAGTTCTTCGTGGTACTTATTACCCTGTTATCCCTATTTTTTTTTTTTTTTTTTTTGTTAATA
GTCTGAATTTTATTGATTATAAATAATGATAAACAAGTTTTCTCCCAAGTATTTGTTTATGAATCTAGGCACAACTACA
TGATGGACATCCGTTAGATCCAGTCACAAAACCATTTTCACAGAACATGGCGCACATGACCAGAGGGCAGAGCGTGAGC
TCGTCGACTTTGCACGTGCAGGTCTGGCAGCCATTTTCATCGATGACGTAACTACTTGCACATGGCATACATTTCACCA
ACGGGCACCCCTGTCTTCTTTCAAGTGCCACTGTTGCCTGACACGTGTGGCCACACCCATTGAAAACACAAACATATCC
GGCTGGGCATCCCATGGACACGCCCCCAGCATGGCTGCCAGGGCTGCATTCCTCCACACAGATACCAATCATGCCAAGG
TCAAGGACAGCTGGGGAGGCCGCGGCCATTGTTACAATAAAAGCTGCTAGAATAATCTTCATGTTGTTTTGTTTTTTTT
GACAGTTTAGTACATTACCCTGTTATCCCTATTTTTTTTTTTTTTTTTAATTACACTCCCCCTT
>Contig158 16314 reads, 671 bases
GGGTAMGAGCAGACGGTAAAAGTCTCACCAGATATAAGGATAAGCTGCTCCAGGTGCATGTCAACTCGTCAGTCATTCA
CAGGTATTTGCTTCGTCCCATCAACAACAGAACTCTAACGAACATGTCTATCCTCTTTGCCCTACTGATTTGCCTGCCA
GCCTTGACCTTGGCACAAATCAACCTCAAACCTTATGACGTCACAGCCGCCAACGCATTCGCTTATTCAGACATCAACC
ATGACGGAGTCTTCGACAGGAGTGAACTGGAACATTTCTTCAAGGAGTACGACACCAACAACGATGGCCACATAACCTA
CCACGAGTTCACCACTTTGGTCAACCAGAACCACGTCCACAACTCGGACTTCAACCATTTCCTCCACGCCCTCTACGCT
GTCTACGACGTCAACAACGACCACCAAGTCAACCACGCCGACTTCGACCGGTTCTACGCCCTGGCCGATAGCAACGGGG
ACAACCTGCTGGAGAGACCAGAGTACATTCACTATCTCTCTGTTATTTTCGAAACCCTCGAGAGCGCTTAATTGGAAGG
ACAACACAGTCATCATAGAGTTGAAAAGACACTTTGGTAACAGAACTTATTGTAAGCCTAAACAACAATAAAAATGTCC
TTAATTCAAAAAAAAATCGGAAGAGCGTCGTGTAGGGAA
>Contig159 3617 reads, 492 bases
AAAAAAAAAAAAAAAAATAGGGATAACAGGGTAATCTTTCTTTCTTAAAATCATCGTCCATCAACAATGGCCAAAAGAA
CCAAGAAGGTTGGGATTGTTGGAAAGTATGGTACTCGTTATGGTGCCTCACTTAGGAAGACGGTGAAGAAGATGGAGAT
TACCCAGCATAGCACATATACATGCCCATTCTGTGGCAAGGAATCTATGAAAAGAAAGGCTGTTGGTATCTGGAAGTGC
GGTAGATGCTCGAAGACTGTGGCTGGTGGTGCCTGGGTTTATTCAACAACAGCTGCAGCACAAGTACGCAGTGCTATTA
GACGTCTTAGAGAAATGAAGGAAATCTAAATAAATAAAGTGTTTTTCAAACTAAAAAAAAAAAAAAAAAATAGGGATAA
CAGGGTAATTGAACAGACAGAAACCAGAAAGCAAGCCAAAGCCGATATTTTCTTCATCGTGGAATAGATACTCAGTTAA
ATAAATCGGAAGAGCGTC
>Contig160 11082 reads, 836 bases
GGTAATATCCGGACGTTAGATTTGAAGGTCAAGGTTGTGAGCCCAACCTCTGTATGACTGGGTAATATTTTTTCATTAC
ATTAGTTTCAGCTTACTATAATGACGTCATCAAAAAGTGCGCTCATCGTTTGCTGTGTTTTTGCCTTGTCTTTGACGGC
GTTTAGCTTAGGCTCCGATGAAAAGCGCCAGACACCGGTCGCCCGTCCGGCCTTCTCCGCTGGACTGACCAGTAGCATC
AACGTGTCTGAGCACGTGAACGTCACCTACGACCGGGTGTTTACCAACGTTGGCAATGGCTACGACCCAAAGACAGGAA
TCTTCACGGTCCCCTTGAATGGGACGTACACCTTCTTGTTCCACGCTCTGGCGGAGTACAGCGGCGTGCTTTGGTTGGA
CTTGTACAGAAACAGCCAGTACATCACTTCAGCCTACGCCCACATCGAGGGTCAGTACGGGGCGGCCAGCAACTCTATC
ACCATAACACTGGCTCAAGGTGATCAAGTCTACATCACGGGACATGGGTCAAGCATCCTCTACGGCTACCCCACAGAGG
TCTACGCCACCTTCACTGGATACTTGCTCTTCTCTTAACCCCATACAACGGGACAACGGGACGGAAGTCGCGCCGGGTC
ACTGTTGTTTTCTCACGCGTGCTGTCAAGAAGAAGTGTCACCAACTATGTACCGACTCCAACGCGACAATCAAAAACAT
TCAATTAAATCGATAACTCTTAAAAAAAAAAAAAAAAAATAGGGATAACAGGRTCTTCCACAACAAAGAACAATCAAGT
CTTTGAACGAGTTGTTACATAGATACTTCCATGATACTCTTTACTT
>Contig161 9081 reads, 594 bases
AAAAAAAATTTTTTAAAAAATTTAAAAWWAAAAAAAAAAAAAAAAAAAAATAGGGATAACAGGGTAGTGTGAAATGAAC
GTCTCACAGGGTAATATAACACAAAGAACACACTGACCGATCGAACGAGTAAACTGACTGCAGTGACAATGAACATATT
AGTCCTATTCTGTCTAGCCGCTAGCCTCGCTCTAACACAAGCTAACATCTCTTGCACGATTGGAGGAGAACTCGTAGAG
TACAACAAGAGTCGTACAATGCAATCCGGCTGTACCACGTGTACGTGCATGGAACAAGGCAGGGTCAAGTGCACCACCA
TAGTGTGCCCGGTGATCCAGTGTGGGGAGGGACAAATACAGGTACAAAAACCCAAACGTTGTTGCTTCGTGTGCGACAC
GGCGCCAAAAGGGTCTTAGAGTCTGAAATAAAGCACCACAACTGATGGAGGACAACTGATGGAGATTGTACATATCTGG
ATCTCTTAATAGTTGGAGAAAATGTTTTTAAAAAAAATTATACAAAATTTGTGTTGGACTAACTTAATAAAGTTTTGTC
CACTGCATGGAAAAAAAAAAAAAAAAATAGGGATAACAGGG
>Contig162 16950 reads, 569 bases
AAAAAAAAAAATAGGGATAACAGGGTAATATTTTCTGGTAATCATTCAACCACCAGATCTCGTCTCAACAACTGAGAAA
ATCAACCTTTGAAGATGAAAGTCATTTTTGCAGTTCTCTTGTGTCTGGCCTTGGCCTCCGCCGCCGTCCTTGACCTTAA
CAAACAGCGTCAGATTGGGGAATGTGTTGATCTGTGCACACCAGGGGTCGCTGAGAGCGGGTGTCCACACGGCCATATT
TGTCTCTCTATCGGAGGATGTGGTCATGTTTGTCAAATTTTGTTACCCGGCAAGCGAGCCACATGCCTAGGTGCCATGT
GTAATGTGTGGTGTCCATACGGACACAAGGTCAATGCTGATGGATGTCCAATGTGTGCCTGTAACGAGGCTCCCATCGA
TATTACTTTTTAAATGACTTGTTATATGACTTGTTTCTTGACTTTCTCATCTCAATAGTTCATAATAATGACTTTACTC
CAAAAATATCCTGTGTGTTTAAGAGTAAGATTGTCAATAAACTATGAGAAATGTAAACAAACCAAAAAAAAAAAAAAAA
AATAGGGATAACAGGG
>Contig163 9210 reads, 1006 bases
AAAAAAAAAAAAAAAATAGGGATAACAGGGTAATTAACTTTGAGCGGTGGATCACTCGGCTCGTGCGTCGATGAAGAGC
GCAGCCAGCTGCGTGAATTAATGTGAATTGCAGAACACATTGAACATCGATATCTTGAACGCATATGGCGGCCTCGGGT
CAATCCCGGGGCCACGCCCGTCTGAGGGTCGGCTTTCTTTTTCTAGGGACGAACCACCTACTAGCACGATAGAGGACAG
GTGGTTTAAACTCTCAAGATGGGTGCGTACAAGTACATTCAAGAAATTTACAGGAAAAAGCAGAGTGATATTATGCGGT
TTCTTATCCGTGTAAGATGCTGGCAATATAGACAGCTTGCCTCCATTCACAGAGCATCACGATCCACTCGCCCTGACAA
AGCTCGCAGACTTGGATATCGTGCCAAACAAGGCTATGTTATTTACCGTGTAAGAATCAAGCGTGGTGGTCGCAAGCGA
CCTGTCCCAAAAGGGTGCACTTATGGTAAACCCAAGACTCATGGTGTCAACCAACTGAAATTCCAGCGTAACCAAAGAA
GTGTTGCTGAGGAGCGTGTTGGCAGAAAATGTGGAGGCCTGCGTGTGTTGAACTCATATTGGGTTGGTCAAGATTCAAC
ATACAAATTCTTTGAAGTCATCCTGGTTGATCCTTTCCATAAAACCATTCGACGTGACCCTGCTATTCAATGGATTTGC
AACCCTGTTCACAAACACAGAGAGCTTCGTGGCCTAACATCTGCTGGAAAGTCTTCTCGTGGTCTTGGCAAAGGTCATC
TTTTCAACAAAACTATTGGTGGATCAAGGAGAAGGAACTGGCGCAGAAACAATACTGTTTCTATGCGCCGAAAGCGTTA
ATTTTATGCTCTTGTTGGTTTATTGGCATTGACAATAAAGCTTCATTTGTACTTAAAAAAAAAAAAAAAAAATAGGGAT
AACAGGGGAATAARACAATCGCCACGTAACCTNTTGGTCAANGTGGGGGACTCACACC
>Contig164 7252 reads, 687 bases
TATCCYTWTTTTTTTTTTTTTTTTTTGAGGATAATTTATTTTCAGCCTTTATTAACAATTTCGCTCATTTGCCTGGTAG
AATGATACCATCGTACTTCTGTTGGAACCACTTCATGCACTCATCTTTACTGATTCTGTGTTTAGCACCAATGGCACTC
TTTCTTCTTCTTCGCTGGCTGATATTGAAGCCTGGACGCCCAAGAACAATGTAGAAGTCCATACCATAGATGCCAATTC
CTGGGTCATACTTGATACCCAAATCAATGTGTTCCTGAATACCAAAGCCAAAGTTTCCAGTTGCTGAGAAATTGTTCTT
TCTCAACTCATACTCACGGACCTTAAGCCCCTTTTCCAAGATTTCCTCTGCTTTAGCCCCACGTACAGTGCAGTGGACA
GCAATCTTTTCATTACGCCTGATACCAAAGGACCTCACAGTGTAGCGAGCTTTGGAGAATACAGGTGTCTGCCCAGTAA
GCTGTTCCAACACTTTTGATGCTCTTGTCAATCTGTCACCAGATTCACCGACGCAAATATTAAGGCAGAGTTTGCGAAT
TCGCAACTCTTTCATAGGGTTCACCTTTCCCTTCTCTTTATCCGCCATGTTGAAAACAGTAGAAAGAAGATTACCCTGT
TATCCCTATTTTTTTTTTTATCGGAAGAGCGTCGTGTAGGGAAAGAGTGTAGATC
>Contig165 7487 reads, 529 bases
CTACACGACGCTCTTCCCAACATCAAGACTTTTGCTGTTGTATGTTGTGTGTTTGTTGTGTTGCTTGCTGTTGTGTTGG
TTTCCATCAGACTACTGGCGCCAAGTTACAGCTACACGTGGGACAGCCCTCAGCATTTAGCTTGTTTCCGTACGGGCAG
AAAATGGCGCACACGGCCCCCAGACATAGGGCCCTTTTACCAGGTAACAAGATATGACAAGTATGTCCACAGCCATTAG
ATGTACAAATATGACCGCTGGGACATCCGCTGTCAGAGACCCCTGGTGTGCACAGGTCAGCACAGATACCAATCTGACG
CTGTTTGTTAAGGTCAAGGACGGCAGCGGAGGCCAAGGCCAGACACAAGAGAACCGCACAAATGACTTTCATCTTCAAA
GGTTGATCTTCTCTGTTGTTGAGACGAGATCTGGTGGTTGAATGAAGACAGAAATGGGAAGTAACTCTTGTAGAGACGC
ATTTAAACAATGCCAGAGATAATAAACAGATGGTCAGAAGATTATTACCCTGTTA
>Contig166 6614 reads, 672 bases
CCCTACACGACGCTCTTTTAATCTCCACTTTTTGCTGGTATGTTGATCTGGTTCTTGTCTGTTTTCTCGCTTGTAACCC
TCTATATCATAATTATCAGGCAATTGGAATAGTCGCGGGAAGGTATCAATTTCTTCTTGTGTGTAGTCTGATAGCTTTT
TGGGTACAATTTGAACCTGTCTTATCTGGCCAGTTACATTTTCTAAAATATCCTGAGGCACATCATCCTCTGGGAATAA
GTGAAGTCTAGCCATTAACTTTTTCCGTGTCTCCAGCCCTGACAGGCGACTATAGACAGCTCTTTCCATTATCCTAGTA
GGATCCACCTCATGCACCCTCCATGCTGATGCCCGTGAAAAGCCTCCAGCAAATCTGGTATGATGAAAGTACTTGAATG
TTCGCCAGTAAGCACCACGCATGGCTACATGCTTTGTGTTAAATACTACAACATGGTCACCAACATCACCTTCTTCATA
ATAAACAGGTTTGTTAAGGCCTTGTAAATATGGTAATATCCTATATGCAGACTTGAAGGGACATTGCTGATTGGCATCA
TATATCCACCATGTCCTGGCCAATGTAGACCATTGGACTACACGACTGCGAGCAGCCATGACACTCAAAGGTTTCGATA
TCTCAAGTATTACCCTGTTATCCCTATTTTTTTTTTTTTT
>Contig167 8666 reads, 954 bases
CTTATTACCCTGTTATCCCTATTTTTTTTTTTTTTTTTTGACTTTAATAAAATTTTATTTGTGCAAAAAGGAAAAAAAA
CTGATATTCGGTACTGAAAAGTTCGTCTGTGCTTTAGGTATTATCCGGTGCTTTTTACACTGCCACCTTTGGGATTATG
GTTTAAGAGCAGTGTACACTGTTGATTTGGTATTCAGGAGTGGTCCATGATTGCCACCATACTTTGAAGTCACATGTGC
GAGTATCGGCGCCATCAGCTACAGCACAGCTGTTCAGTTGGTGGCTGGACATTTTGTCACAGTTGGTTGCTGACAGTTG
AACACCGTAGAAATGATACGAAATTCCAGCCACGACCTGAGAGGTCACCCTGGAAGCACTGACGGCCTTCCTCAGGAAC
AAGTAGTTCTCCTGGGCGTTCAGGGTGGTCACAGCAAAGTCAAGGGCTTTCTGAACATCCGGGTCTTTGATGTCAATGG
GGGATTCCCCTCCAACGAGTTGTCTCTTACCATTTTTACAAACTGGGTCCTTGGTTGTTTGTAGAGCTTCATCGCCACT
CAACCATGGTCTGGCCCATACGTCAACATCGCAGATCTCAGATGTGGTGCCAACAGAGAGCTTGAGTGTGAACTTGTAG
TGCGTTCCAGACACAATCTGAGATTCAGCTTTCATGATGGTATCCAGAGTCCTGACGGCGTTATCACCTTGTTTGGCAT
AAAAGTCATTGACGGCCTTGACGGCGAACTGAACGTTGGGGTCGCTGCCGTCCGCCAGTGGCTGGAATGGTTGGAAGCC
TCCGAATACAGAGACGCAACTTGTCAAGGTCAGGGACAATGCGATACAGGTGAGAAATAAGGTGACCATTTTGGCAGTC
TGACGATGTCAACTTGTGATCGACAAACACAATAAAGGAATCAAAACCCTGTTATCCCTATTTTTTTTTTTTTTTTTTT
TTTTTT
>Contig168 8150 reads, 617 bases
CGCTCTTCCGAKCGYTTTACATGCTCGGCACCAGGGCTTGTGGAATACAACCATAGCAGGCTTGCCCTGTTATCCCTAT
TTTTTTTTTTTTTTTTTCACCGTGAACAGTTCACGTCTAAATTTATTTCATAACGTATTAGCATGATAATTCCATGGAC
ATCGATTAACGCCGACCTGCTGCAACGCCATCTTGGTAGTATTTGGCAAACTCCTGTGGAGAGATCAGCCCGTTCTTGT
TGGCGTCGGCGGTGGTGAAGAGGTTGTCGTAGTCGGCTGTGTCGAGGTGGTTGACGTTGTTGAAGTCCACGTAGGAAAA
CAGACTTTTGAGGACACCGACCAGCTCCGTGTTCCCGGCGTATCTCGTCTCCACTGTACTCGTGTACTCCTGCTTGGAG
ACCCGGCCGTCTTTGTCTACAAACGTTTCACGAGGCATCGTTTGCGTAGATCTAGCTTCCTTGGAAAAAAACCTTATTT
GATTGTTTTAAAAAAAAAAAAAACCTAACACAAAAAGCTGTTAATATATTTCAAGCAACACGGTGAACTCTAATATTAC
CCTGTTATCCCTATTTTTTTTTTTTTTTTTGTAATTAAATCATTTTTTATTGATGATTACATTC
>Contig169 14610 reads, 1345 bases
CCCTGTTATCCCTATTTTTTTTTTTTTTTTTTAAAGCTTTAGGTTTATTTGCAAATCGAAGTGCGGTGCATTGTGGACA
GGATTATGTTATCGGCAAGTACAGTCAGCATGCCACGTATTGAACTAATAATAGTTATTGAACTTCCCGTATCCAACGT
TGCCAATGCCTCCGAGGTATCCGAGATTTAATCCACCGTAGAGTCCGCCACCCAATCCATATCCGTAACCGAGCGACGG
CAATCCGATCCCGACTCCATAGCCAATGCCGACTCCACTAAATCCACCGTATCCATACCCCAATCCACCTCCAATTCCA
GCGTGTCCAAGTACGGGCAAGAAGTTAGCCTCTGAGCTCATGAGAGCACAGGCGACGAGAACAGCGACGAGAACAGCCT
TGTACATGATGGACTGATTGTGGCTAGAGTTCTGAAACGGTCAGATTGCGAGGTGTCTCTGTGTTGAGTTTGCTATTAC
CCTGTTATCCCTATTTTTTTTTTTTTTTYCGCAATGACATACTTTATTTCGATTAAGTTTTAAAACAAGCGAATTGTGT
AATGTTATCATCGTTTCAATATATGTAGCACTTTATTAAATTATTTCGTCCAAAATTAATTTGTGCCCAGCCGAAAAGC
CGATGAATATTTTAATTTAGTTTATTGATTTCAAATGGAATTTAAAAAAACAAACAACTTTATTACTTTCTGATTTATA
ATTGTAAATGAATCTTTGGATAGTAGGACGAAAATAATCGTTTTAAAACGTGTACGTTGGAAAAACTCAATCTTTATGT
TAACATTTTGGCGGGAAACAATGCTCCTGTTCTGAAGCTGGTCCTCTCATATGCGACCAAAGCCAAGTACTGTGACCAG
GCAGACGGCCAATAAGTTCAAGGAAATCTTAGTTGTCGGAGACATGCCCGTCTTGAATCGGTTGCTTCGAGAAGCTTCT
ATTCGCATACCGGTTTCCCTATTCAGTTTCTGACGCTCCTCATCTTCCTCATGCTTGCACATGAAACTGCCAAAGCACT
CAGTCTGCGCTTCGGCCTTTTTCACTTCGTCCTTCTCATCAGATCCCACTTTCTTGCACTGATCTATCCTCTCCTTGCA
ATTGTTAACAATCACGTCTTCCCCTTCCTGGCAGATAACTGTGGTCACAGATAAGAAGAAGATGACCAGCGTTCCGCTC
AGTATTTTTGAGTGCATCCTACGGCCGCTTTCTGCTTGATTGCTCTGATTATGAGCTGTTATGGAGGCAGGGGTCGATA
TTCGGTAGTCGTTTAGGAAATAACAAGAATAGATTCCTCGTCTTTGATAGCTGGTCTCTAGGAAACAACCTGCCATTAC
CC
>Contig170 5474 reads, 630 bases
CCCTGTTATCCCTATTTTTTTTTTTTGTTAATCAAGTATTATTTCTTTAATGTGTATTCATGTCAATATAGGAATTCAG
ATCTTCTGCCCAATCTAAGTTAAAGCCAACCGCTCAATTCCTCCTTTGAGCTCTGCATGTGCTGTATATAATTTTTCCA
GAAGACACATGTGTTTGTTCACCACATTTCGTATTACGCTCATATTTTCCGCGACCCAGACTTTTGACTTTACAGCAAC
CACTGAGGCACTCTGCGCTGTCAGAGCAAGATTCGTCTTTTGCAAGATTCCTCTCCACGTGCGTGTATTCGCCTACGTC
TTTACAGAAATCAAAATAATAAGTAGCGTTGAAAATACGAAGACACATCTCGTTTTCTTTGCAATCTCCTTTATTGTAG
CAAAAAAGGTTCGCCGCTAAGATGTTTTCCAACACAGCACAGAGGCCAAAAACTAACACCAGCCGTCTCAACGTGTCTG
ACATATTCAATCTATGTATGGACCTCACGAGAGTATGTCTTGTAATTGTAAAAAAGAAGTTTGATATCTTCTTCTTAGT
TGTCTGTCCAGACCAGGTTATTATTACCCTGTTATCCCTATTTTTTTTTTTTTTTTTCTTTTTTAAAATTTTTTTTT
>Contig171 5708 reads, 534 bases
AAAAAAAAAAAAAAAAATAGGGATAACAGGGGGTTCCGGACTTCCATGATCCATCCAACTGTAACTCGGCAGTATTCCC
CACGACCTTAAAAATTAACTAGCGTGGAAGAAAACTTTCAAAATGTCATCAACAAAAGAAAGGATTGCCACAGTGATGA
CAGGCACAAGAATAGCGTTTTATTATGGTTTTATTCCAACTGTCCTAATTTTAGGATTCATGAAGGGTGCTGATGAAGG
AACACCTTCTCTGACTCCTCTCAGCCTACTCTGGCAGTGAGACACCAATCACCCCATCATGTTACAGGCCACGAAGTAA
TGTGCTGATAAGTTTGCATGAGTGCATATAAAGACAATGTTCAGTCAACTTATTCATGATTGATTGCACAATCGTAAAT
TAACAATCTCACAAGATGTTACCTTGGTTTTAAGCTACATTTCTGTTTACATTTTTAAATAAATTGATTTTTTAATTAA
AAAAAAAAAAAAAAAATAGGGATAACAGGGAAATAAATATTTGATTACAGAAATAATTTC
>Contig172 19019 reads, 632 bases
CAAGAATAAAAAATGGAWWAAAAAAAAAAAAAAATAGGGATAACAGGGTAATTATGTATCTCTTGTTCAAGAACAATAT
CAGCACAATGTCATACTTGTTCGCTCTTTTGCTTTCCCTGCCGGCCCTGACCTTGTGTCAGCCAACTCACCAGCCAACT
CACCAGCCAGCTGACATAAACGCAGTGGCAGTCTCTACCTTCACCAAACTGGACGCCGATGGTGATGGCAACGTCGAGA
GACCAGAGCTGGACGCCTTCTTTCAGGCCGAAGACACCAACAATGACGGCAGAGTTTCCAGACACGAGTACACTGTTGC
CATTGAAGCCCAGTACGGCCATGACCCCCAACTGATTCACGCCCTCCACAACCTCTACGATTCCCTGGACTTCAACAAC
GACAACCATCTGGACAAGGCCGACTACGACAGACTCTTCACCACCGCCGACACCAGTGGGAACAGTTTGGTGAATGAGA
ACGAATTTGTCAAATTCTTCAAGGACAATGCACAGCAAGCCAACGTTGTTGGTTAAGGAATTAGAAAAAAAGCAACAAA
TGTACTTGTAAAAGTTTTTTTAACACAATAAATACATTACACACACACAAAAAAAAAAAAAAAATAGGGATAACAGGGA
>Contig173 9099 reads, 876 bases
AAAAAAAAAAAAAAAAATAGGGATAACAGGGTAATACACAACAATTCCATCTACTGCCCAGCACAGAATAGATCACCGA
CCAAACTCAACCAGAACCATGAAGTGTTTCGTCTTAGTGGCTGTCTTTATGACAAACGCCGTGTATTTTGGGCAATCGG
AAGAGAGGACCAAGAAGCGAGGTTTAGAACAAAGTGCATTGGCCCAAGAAATACAAACCCTTATCAACGACCTGCTTGG
TGGTCTTTCAACGAGTGTGCTGGACTCTAGGCTGGAGGAAATAATTGCACATGCCATAGCCATAGATTGTGGAGAAGCT
GGTCAAGTTGACGGAGCTCAGCTAGACGCCATCATTGATCGAGTTGTGGAAACCATAAAGAGTCATGGAAAATTAGGTC
AACTCGAGGCCGATGCACTGGAACTGAACAGAGCATTTAACCTGTTGAATGGTTTGGCTAAATACTTGGCTGAAATAAG
TAATGAGAACCAAGAAGATGTATGTGACGTCATTGCGGCCATCCGGGGAACAGCTCAAACCGTCAGAGATAACCTCGAA
GAATTAGGCGAGACGACCATCACATTTAACTTTGACGTCAATGAAAATTCAGGAAAGTCCAAGCGTAAGGTGTGTATTG
GTGTTAGAATTGGCAAGTTTTGTGGTGGTCTTGGCTGGGGAAGACGTTAAAATACAACATCAACATCTTTCAACCAGTC
TCAGTGCCTTGAATGTTTGCTTGCCAATGGTGAATTTTTAGAATATTCTGGGATTGTAAGGTGTTGAAAGATAATAAAC
CTAATTTTCATGGAAAAAAAAAAAAAAAATAGGGATAACAGGGTGATAAYTKCAAGTCCCTGGTCTGAACTTAAACCAA
GGAGCTG
>Contig174 4665 reads, 396 bases
AAAAAAAAAAAAAAAAAAAAAAAAAAAAAAATAGGGATAACAGGGTAATCCCTTTCACGTATTTCCGGCTTCGTTGTCA
CTTTTTATTTTCTACCAGTGACAAATCCACAACATTTATTCAGCCAGTTGTGGTTGAAATTATAAAGTTTAACATGGCA
AACAAGCAGCGTATGAGACTTGCTAGCGAAAAGCACAGTAAAAACATCACAACAAGAGGAAATGTCCCCAAAACTCTGA
AAAACTCTGAAGACAAATACCCTGTTGGACCAGCGCTGATGGCATTGTTCTTATTCGTTGTTTGTGGCTCAGCGGTTTT
CCAAATTATCCAGAGTATCCGGATGTCATGACGAGCATCATCCAAAATTGTGGACTTGTGAGAAGGAGATCGGAAGAGC
G
>Contig175 11125 reads, 547 bases
CCCTGTTATCCCTATTTTTTTTTTTTTTTTTTTTGGATTAAAATGTCTCTGTTTATTCAATTCTAGTTGTATCTAGGCA
CATTTGGGCAAGAGAAGTTTTGCCACGCACATCTTCGGCTTCCGATGGGCTCACAAATACCTGGATGACCTCTTGGACG
AGCTAAAATGGAATTCTGGTCTGTGTAGAGACAGGACGGGTCACCGAGTTCTTCGCCATTGGTCTTGCCATCGTGGTCA
GAGTCTTTGTTACAAAGGTCAGGAGTCCAATTATAGCCGACAGCAGCGAAATCCTCCCCGAACGGATTCAGTTGTCCGG
TTCCACCCACAAGGTAATGTCCGACCCCTGGCCACACACCTCGACCACAGGGGTTATTGACTCTGCTGCCGTTGGGGAT
CTTCGACTTGAAATCGGGGTAGCCAAGAACGGCTGCTATACACAACGCTGTACACAGGAGAGAGAACATTTTTAGCTTG
TCACAGTGCGGAGTGCAGGTTATAAACTATTACCCTGTTATCCCTATTTTTTTTTTTTTTTTTTCATGTTTTT
>Contig176 8717 reads, 658 bases
TGATTTCGTTAACTTCCGTCTAAAAATGTCGCCATTTGTTTTAGATCACATAGAAAAAATCTTTATTGTAAAATGTTGA
GTAGATCTACAACACAGTGGATCGTCATTTGTGCCTACTCTAGAACATATAGCTGCTAAAATGTAACAATTTTTTAAAG
CTTCATTAGAAAGTTTATTTCAGTAATTTCAATTTGTATCACACACACCACAGACAAATTGCTATCACTATCATCCCCA
ATGATCACTATCTAAGTTCTATACAACAGATATCTGTTGACCAAATTTTTAATATGAGCCTCTTCCCCGTGGTCTCCTT
CCCACGACACACTCTCCAGGATAGTCGACCCTGGGTCTCAGGTGGACCGGCTTGTGACAGTTTCTGGCTCTGAGGTCAC
ACGCGTTACCATAGGTCACTTCGTCTGTCCCACACACTGGGGTGTAGTCCAAGGTGCAGGCCTCGGGGCAGATGTTCCG
GTTACCACCGTAGGGCTGTGCGTCACTTCCCAAAAAGATTAACACTACGACAAAGACAGCAGCGTTTGTCAGAATTAAA
CTTTTCATTTTCTTCGTTGAGGGCCTCTAAAATAAACACAGCCTGCAGTACAGAATAACACGTTTTTTATTACCCTGTT
AGCGTCGTGTAGGGAAAGAGTGTAGR
>Contig177 19672 reads, 641 bases
AAAAAAAAAAAAAAAAAAATAGGGATAACAGGGTAATATTAGATTTGGCCACAAGTTTTCAAAAGCATGTTTCTGTACA
TCACTTTCATCGTCTGCCTGCCTGCCCTGACCTTGGCGGAGATCAACTTGAAGCCCTATGACGTCACGGCAGGAGTCAT
GTTCCAGGCCGTGGATGTCAATCATGACGGTGTGGTCAACAGGAATGAACTGGACCTGGCTTTCAAGGTCTACGACACC
AACGGCGATGGCCGCGTCTCAAGACCAGAGTACCTCAGGTACCTCCTGCAGATGGTTCCAGACCCGACCTTGAACCGCC
TGTTTCAGGCGACATATGACATCATCGATGTGGACAGTGACAGCGTCCTTGACCACCACGACTTTGACCGCTTCTTCTC
GCTGATCGACTCCAACAGCGATGACCTCATCAACCTGGCCGAGTATGTTCGCTATTGGTCTGTTCTCATGCCTGGACTG
GAGACCAAAGCCTAGAGGTACTTCATCTTTAAAAACATTTCACTGATTTGTAATTGCGTGTTGAACTTTTATAGTTACT
CGCTGACGTCATTCAATAAAATCTTTGGTTTAAAAAAAAAAAAAAAATAGGGATAACAGGGCGAAAGCTAAAAAAAAAA
CAACAAAAA
>Contig178 13365 reads, 984 bases
GGGTAATATTATGAGAAAGTAATAATGGTCAGAATTCTTCTTAGGCAGCAAACTTTCCTTTCTCGAGCTGCCATGAAAA
TGTCGTGTCTCATTGCCAAGTCTCTGGTCTTGTTCTTTGGTTTAGCGACGCTTGTCAACAGTATTAAAGATGGTACTGA
GGTAGACCAGTGCGGCTACCCTGGCCTGGTGGTGGTGCTGGCCCCAAATGACGCTGTGGTCTGTAACGGAATTCTAATC
AACGGAACCCTTGTGGTGCCGCAGATATGTGGCGCGGGGATGGACGAGTTTCTGAAATCAAACGATCTGATCCTTGTCT
ATGGAAACGGAACACGAGCAGCAATCCCAACTGGAACATCCGGCACCCAAACTGGTGGCCTCAACTCCTACACCATTAC
AGACCCACTGACCAGCTCTTGTGACATTGACGCCACGGTCTACACCAGCGGCTCGGACACGCTGGACACCAGCACGTGT
GAAGTCGTGGGGTTTGGAGCAGACTCCCTGTCTTCAAAGATTTACGACGGTGTGGTTTACGCTACGACCTTGTTGAAGA
GTAGCAGCAGTCCTTGCTGTGACGTCATAATGAACTCGCTGACGTCATCCCAGAAAGGAATTGTACTGGACAGCACTGC
GTCATTCAACTGTCTGACAGCGACAGGATCTGTCTGTGGGTCAGGAGATCTCGGCGCCCCAGTCTACTGCAACACAACA
ACGGGGGACACAGTGGTGACCGGTCTGACGTCATCAACTCCCTGCGCCAGTGGCGACATGTTTCTGGTGCACGACCTGA
CCCAGGGATCCACCAACTTCAAGTTCGGCTACTAGCAGTGCATAACATGAACCACCAATAGTTCCGTGGTCACTGAAGC
CTGACGACTGCTTAACATCCTAATTTTGAGAAATTAATTAAAGCAACACACATTTTATAGAATTAAATATGTAGACGAA
AAAAAAAAAAAAAAATAGGGATAACAGGGKMATAAG
>Contig179 5251 reads, 241 bases
GGGTAATGCACTATAAAACGACACCGTGCTGTCAGGGGTAGCTATATACGCGCAGCTCAAGTCACAACTAGCAATTATC
CCGAAACAAACCTACTACGCCTCAAACATTGTTATATACAGAAGAATCATGTCTGTAAAATCGTCTCTTGTCGCACTAA
TCGGCTGTTTGGCCGCTCTTCATTGTGTTCGTGCAGTAGCCATCTTATCAATGAATTCATGAGCACAGACCTGCAGAGG
CCAC
>Contig180 6687 reads, 878 bases
CGGGTGGGGCCACGAGGAAAAGCAAGGGGGGATCCCCTTCTACAAGGGTGCCGCCTTTGGAGTGAAGATCCTGGTCAGG
CATCACTCATACCAGATTTTCGTCAACAACACCCTGTTCTGTGAGTTCAACCATCGAGTAGCCAAGGAGACAGTCCGCT
ACTTGTACATCCAAGGTGACGTCACTATCAACCGAATAGCCTTCGTGGACGTGATTCACAATCCACCCGTCCCAGTAAT
GACACCAATCCAAGGAGGACTTGCCCCTGGCAGGACTATCTCTATAACAGGTGTACCTCGTCATGGAGCCTCAAGATTC
AATGTCAACCTGGTGTGTGGACCAAACTTTGACGCCAATGACGTCGCCCTCCACTTTGACGCCAGGTTCAACTACGGCA
ACTCCCACCACACCGTGGTCCGCACCCACAAGTCCGGGGGTGCTTGGGGAGGGGAAGAAACTCACGCCTCTTACTTCCC
CTTCAGTCACAACGTTCCTTTTGAGATTCTGATTCTGGTAGAGCATAATGGGTACAAGATCGCAGTAAACAACCAACAC
TTTGTGGAGTTCAACCATCGCATCCATCCCATTCAACGCGCCAATTATCTCAACATTCAAGGGGATGTAACTATCAGCA
GCATCAAGATTGTCTAAAGATGGGCTTTGAATGTAATCATCAGATCAAAATACCTTATCCACAGACCAACACAAATAAC
TTTTAAAAAATTTGTTACTGTTAGACTTTCATGTATTGTCATTGTGAGAAGTTCGTACAGTACTGTCAGTGTTGAAGTT
TATGGACAATGTTCAGTATAAAAATTGTATGTTGTTTTTGTATTTAATAGTTTCATAATAAAATGTTTATTCAAAAATG
AAAAAAAAA
>Contig181 14135 reads, 889 bases
CCATAAAGATGGATGCCACAAGGGACACAACTAATTCTTTTTTATTACCTGTTATCCCTATTTTTTTTTTTTTTTTTTA
CGTCATGTCATAGTATTTATTTAATATGTCTCTTCTTTTCTTTTCTTTTTACAATCTTCAATCTTTAAATCGCAGCGCT
TAGTTCCAGCCATTAGCGTAAAGCCACTTAGCTCTGGCGATGACGTCATTGCTGTAGTCGTTGCCAGTGGTTCCAATGT
CAAGGCCACCCCAAGTTTGAACGTTACTAACACCAAAGTTGTAAGCAGCGACACCACCTTGAAGAGCTTGGCTTTGGGT
CCAGCTAGAATGTCTTGATTTCACCTGGTTGATGTAGGGCACCAGAAGTCTGCTGACCATCATCTCAATGTGGGCACAG
CTGTCCCAGGCCACCGACTTGCAGGGCAGACCGGAGTGGGTGATGTCACACTGCAAGATACCCCAGGCAGCTCCGTTAT
CACCGTAACCCCCAGTGCTAACTAAAAGACTTCCGCCTCTGGATTCTCTACTGGCCAGGGCCGCAATGACTGAAGCTTG
AATACAGTTGGCATCAGCGCTGGCCTGGTAACAGCTTCTGTGATTGTTGAGGGCGGGGAGGTCGTGCTGTACTTCGGCG
TTAGATGCTGCGACACCTCCTGAACGCCTTCCTGTGGGAGTCAGTTGAGTGATGTCACCATGACAGGTTCTTGTCGCTG
CATGAGAATAAGCCAGCAAGGCACATAAGACAATCAGAAACATCTTGGACTTTGTATGTTAGAATTACAACTGTTCAAC
GCAGAGCTGTGTCTATCAGTTAAGATCAACATTACCCTGTTATCCCTATTTTTTTTAGATCGGAAGAGCGTCGTGTAGG
GAAAGAGTGTAGATCTCGGT
>Contig182 4109 reads, 427 bases
AAAAAAAAAATAGGGATAACAGGGTAATCTTTAAACTGGCATTGGGACGAACCCAAGGGCCGTAATCCAAAGTTTGTTT
GCATGTTTGTTAACACATAGAGAGGAATTTTCCTTCTTTCTTTAAAAGCCAGATTACTTTATCTGAAACTTGGTTCGTC
TTATAAACATTTTCCTTATTCTGAATCCAGCGTGACTTGACTTTTCCATCTCTCGGCCAAGGTCGCCCTGCCCACTGCT
GAGACTTTGTGCCTCTGTGAAGCTCAGTTACACTCTTTTATCGCAGACGTTTGCGGCAGGTTTTTTTTAGCACTTGGCG
GGGAGGGGCATTGCAAGCTGAAAAAAATAATAATTAGGCGTTTAATCCCAGAGCTAGTGGGAGATATTTCAGTAAAAAA
AAAAAAAAAAATAGGGATAACAGGGTAATAAG
>Contig183 6886 reads, 504 bases
CTTTCCCTACACGAAGGGGTGGAACGGCTGGTGGAAAATTCCGCATCGCACTGGGTCTCCCAGTGGGTGCTGTTATCAA
CTGTGCAGATAACACTGGAGCTAAAAATCTTTATGTAATCGCCGTCAGTGGAATCAAGGGTCGCCTCAACAGACTACCT
GCTGCAGGTTCTGGGGACATGTTTGTTGCCACAGTCAAAAAAGGAAAACCAGAGTTAAGAAAAAAAGTAATGCCTGCTG
TTGTCATTCGTCAAAGGAAGCCATTCCGGAGAAAGGATGGTGTTTTCATTTACTTTGAAGATAACGCTGGTGTCATAGT
GAATCCTAAAGGAGAAATGAAAGGATCTGCCATAACTGGCCCTGTTGCGAAAGAATGTGCTGACCTCTGGCCTCGTATT
GCTTCAAATGCAAGCTCCATAGCATAAGTTGTTATTTTTAAAGTACAAAATATCTACAATACAAGTGGTACATAAAAAA
AAAAAAAAATAGGGATAACAGGGYRATAAG
>Contig184 11517 reads, 474 bases
CCTGCTGAACCACTYTTTCCCCATTGACATTACATAAATAAAATGATTCATTTGTTGTTTTCATAATCGCAGGCCCTGC
AGGGTTGAAAGAAGAATGTTCATTCAGCCGTCTTGATGAGTTTTGCTGTTCAGGGTAGAATTCCAAAGATGGAATCCGG
AGAGCACACCATATGACAAGTTATGCACCCGTTTTCATCAGGGTGGTAGTTGCACCCCATTGGCGGAGCAGCACACGGT
GGAATGGGGCCACAAGTGGATATCGCTGCGCCTTGTACATTGCAGGCCAAGACAAACAGAAGTACTGCTAAAAGAGCCA
AATATAACAAAGATCTCATTTTTAACGTCTAGTTCTCGGTCTATTCAAAAAATGTTACTGGTTTGAGATCGACTACTTT
GTTAGGTTTATTTATGGTTATCTTTTAATTTATCTCCTCTTTTTTATTACCCTGTTACCCTGTTATCCCTATTTTTTTT
>Contig185 9088 reads, 854 bases
TTACCCTGTTATCCCTATTTTTTTTTTTTTTTAACGGTTCCAGAAACAGTTTATTAGTATGTTCAATTGTTTAAATCAT
CTGCTTGACAAGAGCGTCAATCTTGGTGTCCCTGAAACCATAGTCACCACCATCATTGAAGTGGTTGTACTTGCGGCGC
CACCCACCCAGAGGAGATGACAGTTTGAAGGGCCACAGGAAGTTTGAGGCATACTTGAAGCTGGCACCAACAGTGAAGA
TCTCATGAATCAAATCTTCAATACAGATTATGTTCTTGACACCCAGTTCCTTTTCAATAATGGCATTGTCAGTCAGGGG
GATCCTTTGATGGTTGACTTTACCATAGCCTCTCTTGTAGATAAGCTCCCTAACAGTCTTTAAATTGGGAACTCCCCAT
GCTACGTAGGGCTCAGCAATCTTCAGCATATTGAGTGTTGCTTTATTCAGTCTCACAAATACACCATTGTTAATCTGTC
TCAGTCTGAATAGCTGCAACACTTTTCTTGGACGTGGATGAATACCATTGATACCTCTAATCCTAATAACAAAAGCTAG
TTTTGGCTCAGCAGGCACATAGAAATTTCCAACCTTCCTTGCCAAACGTGCAAGTCTGATTTCATCACGCTCTTTGGCC
CTGTACTCCTTCACATACTTTTCAGCACGCTTGAAAATAACTTTCTTCTTTGCAATTTGTTTCTTTTTATTAGCAATTT
CAGCCTTGACAGCCCTAGCTTTGCTTTGTGCAATTTGCTTACGTCTCTTGAGAAGAGACTCGGGCACCCTAGGCAGCTT
TGCTTGCTTGTCTGCCATTTTAGTTAGGGGTAAAAAGATTACCCTGTTATCCCTATTTTTTAGA
>Contig186 7526 reads, 1166 bases
AAAAAAARTRGCCACGGACTGGGGAGGTACTCCGGTCAAAGCCTGGTCATCTCCTCAAGCCAACGCCCACTGCGGTGTC
CACGATGATCTGGACGTCATCCAGCCGTCTTCATACGATCAATACTTGAGCCAGTTGGCACCAACAGACCGACACCGTC
TCCAGGGTCCGGCTAACAACTCAGTCCTGTGGAACTCTATGATTCATCCCTTGCTAGGCATGACCATCTACGGGGCGAT
ATGGTACCAAGGTGAGAACGATGCAGGTGGTGCCACCAGAGACAAGTACAACTGTAGCTTCCCCACCATGATTACTGAC
TGGAGATTGAACTTCAACAAGGCGTCCAATGGTCAGACAAGCTTATCCTTTCCATTTGGATTTGTACAGCTGGCCCCCA
ACCATCCCAGTCCAGGTGGGACAGTTGGGTTCACAGACATCAGGTGGCACCAAACAGCAGACAGAGGTTATGTCCCAAA
CCCGGACCTGCAGAATGTCTTCATGGCTGTGGCCATCGACCTCCCAGACTTCAACTCAACATATGGCTCAATCCATCCA
CGATACAAAAAGGACATCGGGTCAAGGTTGGCCATCAGTGGTCTAGCAGTGGCCTACCATCAAGCTGGAATATTTCAAG
GACCGCTACCCACAGGTTCTCACAAGACGGCAGCAGGGTTGGTGGTAGATTATGGCAGTACGTGGCGACTGGATGTGAG
GACACCTGATGGATTTGAGCTTGAGTGTGCCTCACCATCCCGATGGGTCCACACACCAATCATCGCCCACACGACAACC
ACTGTGACCTTGAAGTATGACGTATGCCACACAGGTGAAAAGGTCATCGGACTCCGTTATGCCTGGAGCGAGTCGCCGT
GTGCCCTGCACAAGTGCGCCATCTACGAAACGTCCAAAAGTCTGCCTGGTCCTCCGTTTGTGTCTTATGCAGACTTTGA
TCAGTTCGGGAATCCTTATTTTAGTTTTGATAGACCCCAGCGTGTGTGAAATGAGAAAATAAACGTTTTCAAAATGCTC
AAAAAAAAAAAAAAAGAAATAGGGATAACAGGGTGAAAAAGAAGCCCAATGCAGTTGAAGCCGGCCATAAGCATTAATT
AATCTCAAGTTTTGTGTACAGACTAAATTGTCAAGAGCGTCGTGTAGGGAAAGAGTGTAG
>Contig187 4962 reads, 932 bases
AAAAAAAAAAATAGGGATAACAGGGTAATAAAAGACTACAGCAATGGAGACAAAAACAAAGTAAAGTGATTTCGCAATA
CCATAATTCATGGAACCTAACAAAATAATATAAAATGCAGTGGGTTAATTTTGTTTATTCACTTAAACTGAAGATAGCC
AGAGTAACTTTCAAGAATGAAAACAATTTTGAAAGGAATAGTGACGACATTCATCTGCCTGGTGGTTGTGTCACTGACC
ATAACAAGAATCTCTAAATGGATGGACTTCCCCTGTGACCCTGGTCCTTGCGAGGAGGGACAATACTTGGTCAAAGGTA
GTAGCGACTGTCTGCCTTGTCCAAAAGGATTCTTCATGCCAATAACAAAACACCAATGCTTGAATTGCAAAAGCTGCTC
TGTGGTAAACGACTATAATCACGAAGTTCTCAAGAAAGCGTGCACATTGACCTCAGACACTGAAATTGTTTGCAAGACA
GGTTACTACAGATTCCCATACAACTCCTACTGGATGGTGGATAATGATTGCAACAGTTGCACTAGATGTGATCCTCATG
AAGTCGAGGTTGAACCTTGCAGTGAATACAAGGACACAGTGTGCCAATCAAAACCAACGAAGTGATCCGAACCAGGGTT
GAGGAATGCTGACGGTGGAAACGTTTAATTTGTCGAATGCGTTCAGTCTCAATTATAGAAATGTTGGTTTTATATTTAT
ATATTCAAATATATTCAAATCCAACTATTTTCGGCACACTCTACAGACAATAATGAAATAAATGTGTTTAATTGAAAAC
TAGGCTTTTAAAATAAATGCAATGCTAAGACATATTCTTGACAATGTCCGATATGTTTTAATATACAAAATCCTATAGC
AATTGTGATCAATGTGAAAATAATGTTATATCATGTGATACTTTTTATTAATTTTTTGTGTAG
>Contig188 8541 reads, 737 bases
ATTTTTTTTTTTTTTTTTAATGCGCCGACTTTCAATGAAATTTATTTTATAATTTTAACATTTGCCGATCTTCCGTTTA
ATATTCTAAATTAATAGATTTTTTAACATTTTGAAAGTCTGACTTTTAGTTCTCAGGCCATTTCTTAAGGTCAAGGTTT
CGACACCAGGTTTTTATGTCTTCATCTTGCATCCTGGATCCTCTGGAAACTAAACCTGCCTCTTGATGATGAGCCCCAT
ACACTTGTCGTGACAGTCAAGGTCAGGGTCATATAAACATTGGAAAAAGCACATGTCCTCCAATCGCTTCCCTAGATCA
AGGTTTCGACAGCGGATGTTGCAATCAGCGTCGTCGCCACAGATAGGGGTGCATTCTGGATCCTCGGGAAATTGAAGCT
GTTTCTTGAGGATTAGCCCCATACATTTGTCGTGGCAATCTAGGTCAGGGCTAGTGATACACTCGAAAAAACACATGTC
TTCCACACGCTTCTCTTGGCTGGTCTGAATGTTCACCACATCCACGTGGGCTGAAAACACCGAGGAGGTGACGAGGGTT
GTGAGAACGTATACAAGGTATAAAGCGGGCATTTCTAAGACGACAGATGTGTCCTGCTGCCAAATACTACTGCTGTGAA
TTTTCTGTTTTTGTTTTTTTATTGTTTAAAAGTTGCAATGTTATCGGGAATGTCCTACTTAAGACTGTCCTGGGGAATA
AATGACTATGGTGCCAGATAAATGGA
>Contig189 8521 reads, 614 bases
TAACAGGGTAATATTTTATAGAAAGCAGACTTTTAAAAGGGCAGACGTGAACAGACAGAAACCAGAAAGCAAGCCAAAG
CCGATATTTTCTTCATCGTGGAATAGATACTCAGTTAAATAAACAAAATGGCTTTCTCACACACAACGGCGCAGATCGG
AGTGTTGCTGACGATATTAGTTAGCATCGTTCACTCACAGATGGCTCCTACGGATCCCGCTTTATTTGCTAACCTGGTC
AATTCTGCCCCGTCCTCAGCTGGCCAACCAGCCCAGGCCCCCATGGATCTCAGTGCAATGCTCGCCAACTCAGGTAGCT
TTCCCCAGCCAGGCTTGGGGGGAGGCTTGGCGGCTGGAGGGTACCCACAGATGCAGATGCCCATGCAAAACATGGCGGC
TCAACAACAACGTCCATCGCCCGCTCACAATCCTTTGTTGTATCCACTCTTGCTTAGAGGCAGCGACATGGCCCAGACT
TTTGCAGCCGTTTCTCTTTTAGGTGGCGCTGGAGGGGGCGCCGCCGGAGGCCTTGGAGGAATGATGGGAAACCCCTTTC
TCATGTCTATGTTTATGAATTCTATGATGTAAACAATGTCGAGAGAAAAAARGAAGAGCGT
>Contig190 9399 reads, 735 bases
AAAAAAAAAAAAAAAAAAATAGGGATAACAGGGCCTTAGCAGCAACAAAAAAGTTATCACCCTTTAAATTAAATGTTAG
TCTTAAGTTTTTACTCTTTAGCGGTATTGGTCTAATGCTGTGATAATTTCAAAGGGATTGAACGTGTCTTCATTTACAC
TATAGTTTCAGTTTCCTGAGAATCTTGCGGAGATGTCCTTAACATGTGCCCTCTTGATTGTACTTCCGGCCTTGACATT
TCAACTGAGCCTGCAACCCTATGACCTGACGGCGACATCCATGTTCCTCGATATTGACATTGACTTGAGCAACTTCATC
GACAGGAATGAAATCGATTACTCGTTTAGGCAATACGATACCAACAGCAATGGCCGGGTCAGCCGCACCGAGTACATCG
ATTACCTGAACCAACACACGCCATCTATGCACCCCTTGGCCCACGCCCTCTACGACATCTACGACGTGGATAACGACGA
CCAGCTGGACCGTCACGATTACGATTTTTTCTTCCGTCTGCTGGACGGCGATGTCGATGGTCTGATCAGCCACTTTGAA
TATGTCAGATACTGGACTATTCTATTTACTGACCTCGAGCACCTACACACAAGAAATTAGCAGAGATTAACTCATTCAG
GCTGTCATGGAACTAAGCCAAGAAGACGAGCTAAATAATAAATACGTTCAGTGTACGGGATCCCCAAATTTTGAATTGT
TTGACATGCATAAGAGCGTCGTGT
>Contig191 11738 reads, 619 bases
TGCCTATNGTTANTNCCGTNTCNTGTGACTAATNTTACCCTGGTATCCCTATTTTTTTTTTTTTTTTTTTGTTGTTTAA
TATTTCCGGAAAGTTTTAATCAGCCATCAAAGTATCCGTGTTGGGAGTAGTGGTCCCCATTCTCGCCATCGATTGTTTG
CACAAGTTACAGCTAAACTCATCAGAAGAACGACTATGGACGCAGAGGTTGCATCCTGGGGGGCTGTCTTGTCGCTTGG
ACAACCGGTTGTTAACAACAAGGGAACTGTCATTGATACAACTGTTACAACCTTCAATACTAGGGTCCGCCTCACACAG
AGAACAGTCAACGTTTGGCGAAAACCGTTGGTTGACGACAAGATCTTGGCCATCGTAGTTGTCCGCGTCCAACATCCCC
ACGGACATACATGACATCAGACTGGCCGCTTGCAGGACGAGCAGCAGACGGACATGGGGCATGGAGCTGAAACAGTAAG
CAATGGAAATTAAATATGTCATCGTTTCTATCTTGACTTGCAGGGAGCTGAAATAGCAAGCAACGGAGATTAAATCTGG
CAGGGTTTCTATCTTGACTTATTACCCTGTTATCCCTATTTTTTTTTTTTTTTTGAGCGTCGTGTA
>Contig192 5605 reads, 490 bases
CTGTTATCCCTATTTTTTTTTTTTTTTTCTCGTTATACCATATTTATTTGTTTACATTGTACTGGTAAATATGTTTCGT
TTTTCTCGCTGTTAATCCTTATGACATAAGGCACATCATTTCTTCAGAATGGACGATCCCTGCAAATACATCTGTAAGG
CATGAATATGTATTGGCAAAATTCACTGTAAACATGTTCACATCCACTTCGTCGGAATCCCATTTGCTCGCATGCGTCT
CTGCAATCCAACTGAAAGAAACCATCGTGTGCTATCTCCGCGTCGTTGCATCTTTCTATCATGCCCCAACAATCTCCAA
GTGCTTTCCGCTCATCAGACTGGCTTTGTAAACCAACAACAAGGAAGCAAAGCCAAAACAGCTTCATTGTATGTACGAG
GGTAGGTTTGCGGTAACAGCCCGACATTTATTTCATGTAAAATAATTACATGAATCGGGGAAGTCGCTAGGTCTTATAG
TCATCTTTKCTTACCC
>Contig193 8605 reads, 631 bases
CTGCTGAACCGCTCTTCCGATCAAAAAAAATAGGGATAACAGGGTAATATTCCCTGGAGAGCTTTAGATCTGCTTCTGT
ACATTTCAAGATTAAAGTTAGATTCAAACGTCAACAATTGCATCAAGAAAAACAATTTGTCAACAGCGAAAATGAACTG
GCCACTGTTTTCCATGCTGATTACAACCCTCTTTTACGTCATGATTGTAGACGTAGAGTGTGATACATGTGCAACAACT
GGTAGCTACTGTGATCGCGATTTAAGGTGTTGTAACAGCGCCGAAACTTGCTTGTCGTATCGGGATGCAAGAGGTGTGG
TCCATTATCAACACAAATGTAAGGACGTCCGAACTCAAAATCCTTTAAAACCTTTAAATGCACGTTGCAGTGAGAGTTA
TGAGTGTGAAGACAGGTGTTGTCAATATCGACGTTATTGGCGTGGTGCAGGATATTTTTGTGGACCCCAACAAGACCCT
ATGTACGACATTTTTTATCTATGTTCCACATATACTGAGATTTAAAGATGAGGTCTCGGAAAAAATCATTTTAAAAAAA
AGTTATTTAGAACTGGCTTGTAAACCTCAGATTTATTTTTTTTTCAATTTCATTACTAATTTAAGTTTGTAATTTTTG
>Contig194 9146 reads, 664 bases
ATCCCTATTTTTTTTTTTTTTTTTGTATTTTAATTTGTTTATTATGTATTGTATGTACAGTCATCAAAGCCAAATGGTT
AGAATATGAACATCTTAACTTGTGAACTGACAGTGAATATGGTTTCCTTCGTTCTGGCCCCAACCTCCCATTGCGGTGC
AGGTCTGGAGGTACTCAGCACTTCTGGCGTCATTGTGGAGGTCAACAGCCAGACCCTGGTAATGTTTGGAGCCACAGCT
ATGACAAGCGCCGGCCAGTTCGTTGACGATGACTTGTCCCTTGGCGACCAGTGCGGTCAGATAGTTGAGGAGACTGTAG
GTAAGGCAAACATTGCCACCTGGGGCGCCAGGAGATGGGCACTCGGAGCAGGTGTAGTGTGATCTATGCGCCAAATTTC
CGTCGCACATGTCCTTGATGTTGTTGTAGGCGTAAGCGTTGTCCGCCACGCCAGAAGGGTGCCTGGTGGCAAGGTGAAG
GACGCCGGCATTATGCTTGGCCAGAAGTCCACATGCCAGGGTGACACTGGCGGCTGGGCAGGCGGCACCATAGGCGGCG
GCGAGGGTGGCAGCGAAGACGAGGAGGGTGTTCATTGTTGCTTGTGTGAGCTATCGAAGAACGATATTACCCTGTTATC
CCTATTTTTTTTTTTTTTTTTTTTTTTTTTTT
>Contig195 8691 reads, 662 bases
CGGTCTCTACACTCTTTCCCTACACGACGCTCTTCCGATCTGTCTTATTACCCTGTTATCCCTATTTTTTTTTTTTTTT
TTTGTATTGAAAACTTTTTAATCTCACTATAAACCATGCTTTGTGAAGCGACAAAACAAAACAACAAAATGTATTATTC
CTTCTTTCTGTGAGGTTTCAGAAAGTCAGCCATCTCTCACTGTTAAACCCTGGACACTAACCAAACATGAAGTAGTCGT
CACGCTTGGCCTTACAGTCGGCGAGGCTGTGACAGCAGATGATGCAGTGACCGTTGTTGGCAACGTCGTCGCAGCTGTT
TTGGGCTGCTTCTTGAGCGCAACCCTGAGCTTCGGAGCACTGGTACTCGATTTTGTTGCTTCTCATCTCAATTTTTGTT
TCACAGGTGTCGTGCCCGGCCTGGCAGTCCTGTTGTCCTGTACATGTTGTGTAGTCGTTTTGATTGGAGCAAGTCGGGC
AGATGGCAGCGTTGACACCGTAGACTACAGCGGTGGCAAATATAACGACGATTGTGAAATGCATTTTCTACTGTACGCT
AGCAAAATTTCAAACTGTTGATTTCTCTTACAAGTGACTAGCCGCACGTCCCAGCCATCATATATAGGGCGAGTGCTAT
TACCCTGTTATCCCTATTTTTTTTTTTTTT
>Contig196 9794 reads, 507 bases
CATTACCCTGTTATCCCTATTTTTTTTTTTTTTTTTTTTTTTCTACACAAATTTTATTTTATACTTTGACAATGAAAAT
TAATTGTAGAAAATCTGGCTAGAAGATAATGGGTTGGCAAGTCATTGAGCTCCTCTCACAGAAATAACCATCTTGGCAG
GAAGTTGTTGCCGGAACACCCAGTAACAAGGTGGTCATACAGCTTTCATTGGCGCCAAGTTCCGTGACGCAAGAGTCAC
AGCATCCACAGAAGCCTCCTCTGGGAACTATTTTGCCGTTGCAGTTTTCTGCAGTGACGGCGGCACACCTGATAGTGTC
ACATGCGTTGGGGAGGCAGACGATGGCCTCTGTGACGCTGGTTAGGGCAAGGGCTACCAACACAACTGTAAACATGGTT
GACATTTCTTTGCAGAGAAATTAATTGCAGCCACTTAAAACTTGTTGCAAAAAAGAGATTACCCATTACCCTATTTTTT
TTATTTTTTTTTTTTTTTTYTTTTCCTCATCTA
>Contig197 5126 reads, 487 bases
CTAHTTTTTTTTTTTTTTTTGCAATAATGTTGTGTGTTTTAATTCGATATATTTTTCATTAATTATTTTTATGGTGTTG
GAAAAAATCTTTGATAAGTTGATTCTAACCAGGTTTTCGTGAGACCGGGCTGTCAAACATCGTACCAATCTGGCAAATA
GCAATAAGGCGTCACTTCCTCATCACCGCGGAACCATCGGTATTTGCAACCTCCGCAAAAATCGTCGTAACACAAGGCT
CCCTGAACATTGCACGATTCACCCTGGCAGGGGTAAGGGTTGCATTCAAATACAAACTCAGTACAGGGTTCAAATTGCG
GCACACCCCGAGAATGGTTGAGAAGACGGATAATCAGCACAGCTACCACCAAGATGTTCTTCATGTTGACCAATGTGTT
GTCAGCTAAAGGCAGCCGTCCAATGTTATATTACCCTGAGGTCCTCTGTTACTTCTGATATCATTAAATATCAGCAGCT
TGCAGCATTATCC
>Contig198 16 reads, 170 bases
CAGCAAAATCATGGCACTCTAAGCCAGGTCCACACCGGCATGGTCCTGTTTCTGTACAACCTTGACCTTCGGAACTGAA
CTTTTGGCATATACCCATTATGGGCTCAATCTGTATAATAATGTCATCCAGGAGATCGGAAGAGCGTCGTGTAGGGAAA
GAGTGTAGATCT
>Contig199 10095 reads, 951 bases
AATAGGGATAACAAGGTAATTGATTATATTCACAGGCCTATATTCACTGATTAGATTTATTTCGTTAGCCCACTTCCAT
CGCCAGATCTGGTTCTGTTGAGAAAACTGTGACGCCATGAAGTCAACTCCTTCAAAGACTTCATTGCTTTATCTGGTCG
TACTCTATATTTACACAGCTCAGGCGCAGACACCTTGCTGTTGGTTCAGAAAGTGGGAAGGATATATTCATAATATCTA
CGGTGTGTTTGACAGTGTCAGTAACTACGCCTCCACCGCTGAGATCCAGACCTACGTTCACGTGGACTACGACCTGATG
AAAGTTGTCAATGAGTTAACGATGGTCAACGCCAGTGTTTTGACAACTGTCACAACTATTGGAGACTACAACAAGAAAA
TTTCTTACACCATTGTGGGAAGGGAATGTTTCCAGTCACCTTTGACAGAACCACTGGATGAAAGCTGCGTGCCAGAGAA
CGCCATCCTGATTGGAACACACAGCTATGTGGGTGTGAAGGCAAACACATTTATCCTCCCTTTCCACAATGCCACTAGG
ACAACAACAACGAGGATCACTGTAGCAAGTGACAACTGTCTGCCCTTACACGAGCTACTCTTGACCATTGACAAAACCT
CCACATTCAGCACCATAACCATGCAGAATGTCACTGCGGGAATTGTTGATCCCAGTATATTTAACGTACCAGACTTCTG
TAACCAGAACTTTAAAATCACACAGGTCCCACATTTGAGCACTGCTGGCTGGCACACTTTGATCAAACATACAATTTTC
TGAGAAGTAAATTCATTGTCCTGAATAGCATCATAGTACTTGTAAGTCATGGATTCCATCTACAATAATCCTCTACACA
TGGACATTGTATCAAATATAAAAATCACCTGGCATTGAGATCAATAAATGAATACTTTTTACACGAAAAAAAGTCGTGT
AGG
>Contig200 4522 reads, 753 bases
GGGTAATCCAGAAGAAAAGTCGGCAGCACTTCAGTTGAGTTACTCATGACCACCACGTTTCACACGCCCATCAAATCTC
GCTCAGTGACCCAGCAGGTTGCAACGCTTCATCACGGCACACTGGCGTCTGGTAACAGTGACTCGTGGGATGGAGACCG
CCTTGTCCTCCCCCCTCTCCCTCCATCTTACATGATTGGTTGCAGCATCATGGATATTAAATACACATTCTGAGCTCCG
TGTTTTCCCCACGGGACCAGCCTTTGAATTAGCTGTTCCCCTAGAGATCCTCATTGGTACTGTTCCTCTCACTTCTACC
ATAGAGCAATACTTGACAATGCATCAAATGACACCACCCACACCCAGAGGTGTCCACTGTGTAGGTCTAAGAGGAGCTT
CTGCTGCAATGGTTGAAGACGACTACAGGCCCAGCTATTTGGCTCCTACATTTTCCTCATCACCAATGTGCCATTTCCA
TCTACATAATGATGAGGATGACCATCTGATGATCACAGAGACCGACTACAGCCCCCGTTTTGCCATCTACAATTTTCAA
ACTGTTCCTCCAAGGCGGCATCAAGCAGTCAGATTTGCTACTTAATAAACTCATATCAATCAGAAAATAAATTAGACCT
TGTAAACATGTCAGTTTTATCATTTCCTTGGTCAAGAGGTTACAAATGATTTATATTTTAATAAACAAAAACAAATTAT
AAACTGAAAAACTGTATGTATTCTGAAATAAATTAAAAGAAA
>Contig201 542 reads, 213 bases
AAAAAAAAATAGGGATAACAGGGTAATAACACAAGGAAGACAGCCGCCATCAAAAGACGTGTATTTTTCATCCACACTA
CGCTACAATGTTGAGACTCGTAATCCTCCTGACTACCGTTACGGTGTTGTGCGTGCGCGCCGAACTAGTCTGCAATGTG
AATGGGATTGTCAGCAACTGCGCAGATCGGAAGAGCGTCGTGTAGGGGAAGAGTG
>Contig202 10164 reads, 683 bases
TCTTCCKATTTTTTTAGATTTTAAAATATTTTATTTGTCCAAATAATAGACAGATATTATGAACAGCTTCGCAGACGAT
TTGAACGCATTTACAATGTCATTATGTTATTACCATGACAAATTTTAACTGGAATATTTTATGCTTTATTAAATGAAAT
AATGTAAGATTCATTGTTGTAACTCTTAAAATGAACGTGGTAGACTTTCAATTTTATTTGGAGTAATTATTATGAGTAA
ATAAATTCAAATGATCTTGTCGGCATTCTTTTCCATCTTGCTCTGAGATGCTCCATTACTGGAATGTTACCCCTGCGCC
CAGTACCCTACGTAGCCGCTGCACTTGCACGTGATGTTCCGACCTCGAAGAGGGCAATGTTCCAGGGAGACCCGTGTAC
ACTCTCCTGTAGTGTACGCAATACTCCTACACTGCTCAAGGCAATCATTTTCAGTCCAATCACTTCTTGGAAAGCGATA
CTCGTTGCAAGGTTCAAAACGTCCGAAACATCTGCCAATGTAGTGAGTGTCCAGAATGGGAATCATCTGCGCAGTGAGT
AACTCAGCTATGGCAAAGATGATCAAAGCCAACACAGCAGCTTGCTTCATTATGACTCGACAACACTAACAAACGGAGA
GTGCAGTTTTCTCGTCTATTATTACCCTGTTATCCCTATTTTTTTTTTTTT
>Contig203 5256 reads, 566 bases
TAAAAATTTTTTTTTTTTTTTTCATCATAACTATAACATTTTATTTCTGTGCTTTCTTGCCACCCCCTTTAATTTGGCT
TGCAATTCTGTCCAAATCACGACGACCCTGTGCAGTAAGACGTCTGCCACCAGCGTTTGCATCAGTTTCGACCATCTTC
AGGGCTTCCAAAACCTGAAGTACTTTGCGGGCAACAGTTGCAGAAGCTAGGCAGTGATGGCTAGGTGTTGTTCCATTTC
GCTGATTGCCTCCATATAGTTTTCTCAGAGCTCCTACTCCACAAGGCGCACGAATATAAAGATGGCGAGCAACAGAAGC
AGCCCTGATGTAAAACCAATCTTCATCATATGGACTCAGCTCATTGAAGCGTCCCAACTTGACAATATCAGCCCATTCT
GGAACCTTGACCTTGCCAGTTCTCTTCAAAAAATCAGCTAAAGCTCTTGTGAAATCATGAGCATTTACATCTTTCACGG
AGACTCCCATCTTGATTAGCTAAACTATACCACTTCTCTAGAGGTATATAGCGGAAAAAAGATTACCCTGTTATCCCTA
TTTTTTTTTTTTT
>Contig204 7797 reads, 514 bases
CGACTCAAAAAAAAATAGGGATAACAGGGTAATAGCATTTACATCACAACCAAAAAGCTTGTGCTCGGCTCTCGGCTCA
AGATCCGGACGAAAGTCTTCACCATGTACAAAGCCATCCTTCTGGTTCTCACCCTCGCCGTACTCGCCATGAGTACTGA
GGCCTTCTTCTGGGGAGGATACGGGGCCACTCCCTTGGCAGGACTCGGATATGGAGGTCTTGGATACGGAGGACTGGGA
GGATTCGGCAGATTAGGATATGGCTACGGTGGTCTCGGTGGTCTCGGCGGATGGGGATATGGTAGAGGTCTTTACTACT
AAGGACTTGGCCATACCCGGGGTGTTTGTTCGATAATGATGCATGGCACGTTTCTCAAAACCTAAACTAGAATATTTTA
TGCAAAGTTAAAGAAACAAAATATAACGTGATGTTCATTTTATACTTTACAAACAAAATAAAAAAATAAAAAAGCGTAG
TTCACCTCGAAAAAAAAAAAAAAAAATAGGGATAACAGGG
>Contig205 17098 reads, 611 bases
CATTCCTGCTGAACCGCTNTNCAGAAAAAAAAAAAATAGGGATAACAGGGTAATCACAAACGTTGTAGAATATCACAGA
GCTTCATCCCCTAACATAAACCAGGAAAATGTTCAAACTGGCTATAGTGTCGCTAGCAGTGGTCACTGTGATTCTTGGC
CACCCGTCCTTCAAGGGGCGCATTCCTAATGGAGACAAAGTTCCCAGTCCGTGTCCAGCTGGGGGTGTGTGGCCAGCAG
TTGGTCATTTCAACATCTCTGGAGGCGGGGACAGAAACCCATTTGGCGTGGACTTCGAAGCGGCCAATTTCAACTGGAC
AGCAACACTGTGCCAGCTGGACTCTGACCTCGATGGTAAGACCAACGGAGCTGAACTAGGTGACCCCAACTGTGCCTGG
ACACCAACCAACAATGCCGCACTGTCCGCCCCCCTCAGTAATCCAGGTATTTGTGATCCCATCAGTGCGCCGGCCTGCA
AGGACCAGAGAGTCGTCTGCTAAGATAATCAACGTCCACACCTGTATTTATTACCTGCACTACATCAGCATAGAACATT
ATAATAAACACAACAACGGCAGCTTTAAAAAAAAAAAAAAAAAATAGGGATAACAGGG
>Contig206 9662 reads, 816 bases
AACGAAAAACAGATGTGAAAGCTTGGAAACTATATTACCCTGTTATCCCTATTTTTTTTTTTTTTTTTTTAGGTGACAT
AAAAATGTTTAATAATCAGTTGTTTTATTTATACAAAAATTTCAAGACGTGAGACATGACCAATCAGGCGTGTGGTGTG
GTTGACGTGACCACCAGTGTACCACATGGGGGCGCTACATTCGACTTCCAGTCACAGGAGTCGATAAGTGAGTTGAAAA
CGAGATGTCCTGCACAATACAGACGTCCGAGGTTTGACCCGCCAGAGCAGACAAAGTACGAGATACAGTTGACCGTCGT
GTCTGGATAAAATCCATCTTTGCGTCCTAAGCAAATGGTGGTGTCGCCGCAGGCGTTGTGCCCTGTTCCGGGTAATTCG
CATGTCATAGTGTCCCTGTCCAGGACTTTACCAGCGTCACAGAAGTGAGTTTCCACCTGTTTGCTGGCGTTACAGAACT
TGTGTCCCCAGCAGCCCACCTCCACTACCCACCCCTGGGGCTTCGTGAGACAAACTTCATCTTGTGAAACTACAAGACT
GAAGGACGCACACATAAGCACTATTAGTAGGTTTACTCTTTGATCCATTGGGTTAGGTAACCTGATAAACGTTTCCGTG
TTCTACAAGGACTGTTGCTCTTAATGTGAAGCAGACTAGTAGACTTTAAACAGAACGATTTATGAAGTGCTGCAGAGGT
CTCAGTTGTAACTGACTAATTGAGTCCTCGACTGTACTGTGCTGTGATGTTCCAGTTTCTTTTTGTTCATATTACCCTG
TTATCCCTATTTTTTTTTTTTTTTTT
>Contig207 7545 reads, 874 bases
CWMACAAAAAAAATAGGGATAACAGGGTAATGTTGAGCATATCCCACTTGTCAAGCAACTGCTGAAAATGTTTTGGTTT
GTTGCAAGCGTTTTGTTAGGACTGACGTCAGCCGCTTCTAGAACCTGCTACGGCGACATCTCTCAACTGTCTCCAACTG
GCCGGAAGAATGATGTGGCTGCATCCAACAGCGCTGTTCTCAGTGACCTGACCGCGCTAAACGCACTTAAAGACTGCTT
CCAGGCATCCGCCGACAAGAACTGTATCCAAGCCTCTGTCATTGCCGCCATCGCCAGCAGAGAATCCAACGGTGGGAAA
ACACTTAAAAATGGCTACGGTGACGGTGGGAAAGCATGGGGCGTCATGCAGTGTGACATCTCCAGGTCTCGCCTTCCTT
GTACTTCTGTGCCGTGGAACAGCTGTGGACACATTGAGATGATGGTCAGTCGTAAGCTGGTGCCTGACATCAAAACGCT
CGCTAAAAGACTCTCCAGTTGGACTCCAAGCCAAATTCTTCAAGGTGCTGTTGCCGCCTACAACTTTGGCACGTCAAAT
GTTCGGACCTGGAGTGGTGTTGATGTTGGCACGACTCAGGGAGACTATAGCAATGACGTCATCGCACGGGCCAAGAAAC
TCCAGGCCCTAGGATGGAACTAGATTTATTTTTCAAATTGTTTGTCCTCAGAGCCATTTATTACTAAAAACAATAAATT
TTCAAATAATACAAAGTTGATTATCATTTCTCATTTTATAAATACTATCATTTATTATTCAGCCACCATTTACCAAGTA
TTGTATATCTAAGTTAAAATTGAAGCACTTTGCTAAATTCGGCAAGGAGTAACAGAGAATAAAATAACATATTTTAACA
AAAAA
>Contig208 25594 reads, 684 bases
CGAAAACTTGGTGGTGAAACGTGTGGAATATTTGGTAAAAATATTACCCTGTTATCCCTATTTTTTTTTTTTTTTTTTT
TGTTAACACACATTTTATTCAAGATTTTAATATTTTTGTTGGAGTAGTTAAAATGATGCCATCAATCAGACCCTCCATT
GTGGAGAATGCAGTTGTCATGGCGTGTCACATACACTACAAACATCCTCATCGCTCTCTCACATGTTGTATGATTGGAT
CATCTCAATGGTAACGTTCATTTATCCAGACGGGCAGTTGGTTTCATCAGTCTTGTCACCACAGTCATCATCGCCGTCA
CACTGGTAGAAACGTGTGATACATTTGCCGTTGTTACATTTCAGTTGGTTGGGGTGGGTACAGTCGGTGGGACATCCAA
CTTCATCAGAACCATCGTCACAGTCGTCCTCTGTGTCACAGACCCAGGTCTCCTCTATGCAAGGTGTCCCTCCAGACTT
GCATTTAAAGTCAGAGGGGAGGCAGGCTTGTCTCAAGAAACTCCTCTTGTTAGTGTTGGCGCACACTACAGCCACCAAC
AGAAAACACGCGAGGACACACAGTTTAGCTGACATTGTCATGTATTTGGGAGGTGGAGATAGTCTCAGAACTATTATTA
CCCTGTTATCCCTATTTTTTTTTTTTTTTTTTTTTTCATTACAAGGGGATTT
>Contig209 12625 reads, 1264 bases
TTTTTTTTTAAACACAAATCAATTACAATGTTTAATGCCATACTTTAACAAATCTAGGCATTCAGACTGGTTGTAAAAA
AACAAAAAGACTTTTTTTTTCTTTAAAGCAAAAAAAAGACAATGTTTAAAGTCCCAGTGGTGAATGTACCTCCGGTCAG
TTTTTACACCACATTGGGACGTTGGTGTGTCTATGGGTCTCCAGACACAATTTCGCTTTCAATGCTGCATTCATTCTTG
CCTTTAGCGATCTTGAAGAAACCTTTATCTCCCCAGTCCTCGTTCCACGAGTTGGCGACCAGCCAGTAATCTTTGCCAT
CCTCAGTTCCGTACCCGATGATCTTCACGGCATGACCGCCTTCGTAGGAGCCAGTTGTATGTTGGTACACGCCTGTTTT
GTAGGACAGGAAGTCTGAATAAACGTCGAAGGCAGCGGTCACTGGTCCATTGTCGACGAGCTCCTGCATGATTTGCTGG
ACCCCTCGGACACCGTAGGACTTCTTGCCTTTGGTTTTATCGTTGGAGTAAGACTTGGCGTAACCGGTTCTGCATTTCT
TGACGCATTTTGGTGTGTTGACAACACCTGGGCATGGCTGGTACTTGCCGGTTGTGTGGTGATCGCAGTGGGGTAGCGA
GTATGGCATGCAGCCCTCGTTAGTGCCGTACTGTCCACCAGTGACAACTCCAGTGTCCACGTACCACTCCCAGGCAGCA
GCAGGAAAGCCACCGTTGCATCCCATGCCGCAAGATTTGCAGCAGTCATTGATGTCTTCTGCTGAGATGTGAACGTCAC
CAAGTCCAGCGATACAGATGCGGTCAGTCATGGCTTCGGCTGAGCCAAAGGCCCAACACGACCCACAGTTCGCCTGGTC
ACGGATCTCGTTCAAACTTGCGCACTGCGGCCACTTGGTCCTGGGGTCAAAGTCGGTGGGGAGATCGTTTCTGACCTGG
ACTTGCTTGTACTTGAGGTGGAGCCTGTTGTATGCCCTGTTCTCCTCCATGTTAACACCGAGCAGTCCCCTAACTCTTC
TGATATCGTCTGGGTGAAAGTTACGTCCTGCCTTCCATGTGGCGTTGGCCGCATTGTTGATGTAGAAGATCTGGGCGTC
ACTCAGGGGCTCCATGTGGAAGGGTGTGGCCATGGCAACGGCCAGGAAGGCACTCAGCGCGAGGCACAGCATCATGGTT
GGTGGTGTGTAGTTAAGTGGACTTGTATGGTATGAGACCAAAGTATTACCCAATGTTATCCCTAGCCTATAGTGAGTCG
>Contig210 10351 reads, 905 bases
CGATAACAGTTTTGAAAGAATNNATNCGNGCACCAGCGGCAGTGGTAAACATTCCAGTGTTGGTGATGAGGTCCAGAGC
TGCATCGGTACGTCGTATTACCCTGTTATCCCTATTTTTTTTTTTTTTTTGCATGATGGCTTTGTTTAATGACATGTAA
AAATGAAAATTTAAAACTAAATACTGGTCAGTAAACAGTGAGCATTACGTATCATCAAATGCCAGTCTCATTCCTTGGG
TCATGTTCAGTCCAATATGACATCATACATTTCCCTACGACTGGGGCACGTCATCAGGGCACGAAGAAGGAATAACGAA
ATAGTTGGGGTCAACTTGAGTGACAGCATCGTAGTAAATAAAAACAGCCATAGGAGAGCCAGTTTTCGTGCTACGGAGA
TGTCTGACCATTGGAAACACGGGGGTGTCCGTGGTGTAGCCAAGTCTCAGGGCTGTGTCCTCACCAAGGTCAATCTCCC
AGGTTTGTACTTTCAACAGGTCAAGGCCGTGACCCAGATACGTGTTGTTAGGGCTGACAAGCACTGCCGATGATGGCAA
GCATTGAAAAATGGCGTCTGTGCTGTCCATTCTGTATTTAATGCACTTGCCGCTTGCTGTAACATTATAGGCGATGAAT
GTTTTAAGATCAAAGACTATAACATATTTGCCTATTGCATCGTACTTCGCTGCTACATTTTTAGTAAAATCAAGGGAGT
AAACTCCATAACTGTTGTCGATAAAATTATAAAATCCGACTTGCAGCTGTGAGGGGAGACAAATCTGGGTGGGATCTTG
ACTGAACACTACAGAAGACACTAGGATAAGTGAGAACAGAACTGCAGACTTCATGTTGTTAACTGTTTAGAACGTCATA
CTGCGCTTTTATAATTACCCTGTTATCCCTATTTTT
>Contig211 1593 reads, 475 bases
AAAAAATAGGGATAACAGGGTAATACGGATAATTCACCTTGTGTCTGACCACATCATTACCTTGTGTCTGACCACATCA
TTACCTTGTGTCTGACCACATCATCACCTTGTGTCTGACCACATCATCACCTTGTGTCTGACCACATCATCACCTTGTG
TCTGACCACATCATTACCTTGTGTCTGACCACATCATTACCTTGTGTCTGGCCACATCATTACCTTGTGTCTGGCCACA
TCATCACCTTGTGTCTGACCACGTAATATATGTCATGATTTTTTAATTTATTATGTTCATTGATGGGGTATGACTTTTT
TGTCTGGTAATATGCATAAAAATAATCATTACATAATCATGCAATAATCATTGAAATAATATGTTTGAACTTAAAATAA
AATTTGTGTGCTTTTGTCAAGGTTCAGTTTAATGCATGCACGTGTGCATTCGGTTTCAACCTATAGATTTACCAAGCGG
G
>Contig212 1750 reads, 521 bases
GGAGAAATTTATTTTGCCACATTTATTGCTTACATTCATATTATTTTCTACGTTTGATAATTACATGACGTTTAAAATA
TATTAAAATGTATTACGTGAGTTTTGCTTAACCTATATTTAATAATTATCTTTATTATTATTTTCTACATCAGACTCAT
CATAAACATCGTTGTGAATTGAATGTTTTTTGGAAATTTCTCCTCAATGATAGGCATATTATTTTGTTGGTTCCTGTCT
TGAGTAGTGAGTGTATGCTCCATTCTGAGATGTGTGCGACATGTCACTGAGTGTGCAATGTGAGATGTGTGCGACATGT
CACTGAGTGTGCAATGTGAGATGTGTGCGACATGTCACTGAGTGTGCAATGTGAGATGTGTGCGACATGTCACTGAGTG
TGCAATGTGAGATGTGTGCGACATGTCACTGAGTGTGCAATGTGAGATGTGTGCGATTACCCTGTTATCCCTATTTTTT
TTTTTTTTTTTTTTTAATACTNNGTTAACTTTATATTGACATTTGAG
>Contig213 15267 reads, 1062 bases
TGGTATGATGAGCGAAGTAGTGTCTCGTCACAGGGCGCGANNGACNNNACATCTTATTACCCTGTTATCCCTATTTTTT
TTTTTTTTTTTTTCACCATATAGCAATTTTAATAAACTAGAAACAATTATAAAATGACGTCATTCATTCAAAGAACTGC
CGAAGGGAGATCATTCTAATCAACTACCAAGGCGTTTCCTTTCTTGTGGCCAGATATTTTGCGATGTTTGCATTTGATC
GCATGAGTTCAACGTTTTTCTTAATGAGCGGGTAGTTTGAAATGTCAAGGAATGAGGCAAAAGTGCCGCCAGTGGTTGA
GTCCAGGACCAAGAACTCTACGAGACTAGGCTTTTTTCCCACAAAGTAGCCGGTCCCATTCTTCTTCAGGATGTCCTCC
AAGAAGCCCAGGGTCTTGGGGACCAGCTCCTCTTTGACCCTTTTGAAAGCAGCTTCCTTAGCAACGGGGTCGTCTGTGT
AAAACTTGGCGTCCACTGCGGGGTTGAAGAAATCGTTGAAGAGCTGGACGATCTCGTCAATTTTGAAGATCTCCAAACT
GGAGCTGCCGTAGAAGCCGAACTCTCGTGCCAGAAAGTTATAAATGGCTGTGCTCTGGGCATAGACGACACCGTCTACG
TCCAAGGTCGGGACTAGACCATAAGGGGTCAGTGGCTTGTACTTAGGCCAGTCCGCACTGACGAATCGGATATCTTCGA
ATTCTTTGCCAGCGGCAGCGAGAATAATTCTGGCCACTTCAGCCCGGCCACGGCCATCAAAGTAGTAGAGCTTCAGTTT
CGAGTTGGCCATCTTAAGAAGTGTCTGAATTCTTGTTAAAACTCTCGGATGACTGGGAAGTAACTTGTTATTACCCTGT
TATCCCTATTTTTTTTTTTTTTTTCAACAATAAGTTGAGCATCATTTTCTTTTATCTGGGTATCAATAGCCAGTCGCAC
TTTCTTGATCTGAGTAACTGTTAGTGGCTGTAACTGCTCTGGAAGTACTTCATCAAGTTTCTCAATAATAACTGCTGGA
ACAGGATCATCAGATCGGAAGAGCGGTTCAGCAGG
>Contig214 9928 reads, 1318 bases
AAAAAAAATAGGGATAACAGGGTAATACGACCGGCAGGGAACGAACATTCAATTATTGACAGTTTTACACCAGCGCTGC
CTTACTGTCTTCGACATGCTGAGGTATTGTGATGCCGTTTGCCTGGTGGCTGGAGCAGTGATGCTCACGCAGATTTGTG
TGGACGCTTTCCCTAAGGGTCCCAACGAGTACAGGGGCTACAGATATGTACCTGGCGCCAATAGGAGAGGAGGCTCTCG
TGGTAACAGTCGATCGGGGGGTAATCAAACCCCGCAAGGATGTGCCCCCCAGGCGAGCGAAACCTTCCTGAACTTTCTG
GCTGTTCTCTCGGGCGACTACGCCCGCACACAATTCAAAGTTGGTAACAGTGTAGTGGACACACCCAGTAGTCTGCTGC
TCAAACCAGTCGATATCCCCATCGTCCAGTGGGCTCTGTTAGCTGAGGAATACTCGTTTTCCCAAGTTGTTAGGCGGGG
AATTCTTTCGTCCGTCCCAGATGCTTCCAGCAACCTCATCAACGTTTTCCCGTTCAACTTTACCAACACCATCGCCAAT
TTGGGCGGCACCTTTGACGAGTCCTTGTTGGGTTGCCTGAGACCGTCTGACCTGAATTACACCCACACTTGTGACAGAC
TTGTCTCCCCAACGTCTGACCCCCTTGTGTTCAAGTTCACCAAATGGCCCTTCTGCTCGGCAACACAAGATAACCCTCC
CATCTACAGTGCTGTAGTCAACTGTACCCACATCGTCGTTACGTTCCATGACATCAGCGTTGTTGACTCTGTACCACAA
GACCGTTTAACCCAGTTTATTTTGATCAAGACGGCCAGCTTCCCTCTCCTTCCTTCGTGGACCAGAGGCCAAAGATATC
GTCGCAATCCATGTCCGGCAATTTAGGGCAACAATAATCGTACGGACCAGACATAATTATTTGTAGCCATTTAGTTACA
TTAAGAATAATCATATTTTGAATAAAAAATGGATATTGTATATTAAATGGCTTTTTGTTGGTCATTTAAAAATAATATT
TCCTAAAGCATCTTGCAATACAATTTCAAATCCGTTTGTTCATTCGTAAAGTGTATTTTATACTTTTAATTTCACTAAG
TTACTCTCCTGCTTATGTTGTTTTTGCAAACATATCGTATGCACCAGGTTACGTGCTGAAAATTATCATCATTATTATG
TACAAAACTATGTAAAACTATTTAGACCAATGAAAGAAGCTTATTTCATCTCATTGTATTACTGCAGATTTTCCTCTCA
GATTAAATTTGCCAATCTCTCKGAAAAAAAAAAAAAAAANTAGGGATAACAGGG
>Contig215 8225 reads, 1450 bases
GGTGGAGCCAAAAGGACGCCGAGGTTGTCTGCAAGGAGCTCTGTTTTAACAATATTGGACTGAGCACTGAGGTTTGCCC
GCGTCCAAGTGTGGAGTTCGGGTTCACACCCCCTCTCAACGACTCCTTCCTTATCGCCTGGGACAATGTCCAGTGCAAT
GGATCCGAAGGTTCAATCTTCAACTGCACGAAAACCACAGGAACGCTCAGGACATGCAGCAAGACTGAGATCGCTGGAG
TACAGTGCCTTGCACAGCCAGAGAATATACCACGAATGGAGGCTCGTCTCAGCTGCTTCAACTTTAATGGCGACCTCGT
TCTTAACTTTCCCATTGAGGATTTCCCGGGTATCCGTGCCACGAACTTGAGAATCGTCGGCCAGTCATCCTGTGATATC
AACAGTATCACCAGGCAGTCCTCAAACCCAGGCATCGACCTGGTCATACCCCACAAAGCTTGTGGAACACGTGTTTCAG
TCAACAACAACACACATCTGTGCTATCAAAACACTGTTGAGTACGACAATGAGATATACAACAAGGATGTTTTGTTGGA
GTTCAGAAAGAAAACGTTTACAGTAGAGTGTTGCATGCCTCATGAAAAAGACGTCAGCATCAAGTTTGTACCCCAGACG
GCCGAATTCGCCAATACAATTATCCGTACATTCGATTACATGCCTGAGATCAGCTTCTACGAGAACGAGCAGTGTGACA
GGAAGATCACCCAGAACCCTTACTCCGTGGAGGTCGGCAAGTGGGTCTACATCGGGATCAAGGTCACGGCCGAGTCCAG
CTCGCTGTTCCAGGATGACGACATGAAACTGGTCATCACCGGATGCACGGTCAACCCGGTCACCAACGGCACAAGTCCG
GCCAACGTGCCACACATGACACTCATTGAGAACAAGTGCCCAGCTGACTTTGACAGTGTCACCACCTACCCAGTCAGCA
ACACCACCGAAGGATTCCGCTTCAGGGCTTTCAAGTTCTTTGGTTACTCCTCTGTCTACGTGTCGTGCCACCTCCGTGT
CTGCTTGATTACAGACCCCAAACCCCAGTGTGATAGGTCTTGTATTCCCACTATAATTGGACGCCGTCGTAGACGTGAC
GTCGCCAACAACGTCATGGGACTGGACAACGTCATCTCTAAGACACTGTACATCGTTGACCCAAAAGATCAACAGCAAT
AAGCCAGTCNTTGGACCCACCATCACTTGATAACGGTCATCGGAGGAGATAGAACATTTATATAAACCTTTTACAGCGA
GAAAGGAATTTGATGGCAGCCACCCAAACGTTTGATACCTAGAACTAGAAGAGAAAACACTTTCAATGTTGCCATTATG
ATAAATACATTTTGACTATGTCAGTAGCAAATTATTATTACAGATTTGATGAATCAAAAAGAAATAAATAAGATAATTA
TATCAAAWAAGAAAAAAAANTAGGGATA
>Contig216 6678 reads, 792 bases
GGGTAATATAATGATTACACCGGACAGTAAGTTAGTTGACTTATACCTGGACTGCATGATATCACAAATATTTGGCTCC
GAATTCTACACAAGTCAGGCGCTTCTATAGATCAGACTAGAAGTCAGTTTTTGCTGTTTTTTAGGCTTCAGATTGGTAT
AGAGTAATATAGAGTATAGACCTTCTACACAAGTTAAGGCCCCAGATTGGTATAGAGTACTATAGAGTATAGACCTTCT
ACACAAGTTAAGGCCTCATCAAGGACTGCGCATTGAGAGGATGTGGCGACAACCCTACCATGACGTCCTCGCCGTACTT
ATCGCCGCTTTCTGCTGCTGGTGTTTCTCTACGACCAACGCTGCGGCGATCCTGTACCCATTGGCCCCTATTAGTGGCG
GGGAAGACTTATTTGAGGACCCCCGAGCTGACCCAATCGTGCCAATAGCCAAACCCCTGCAGCCGTCATATTATCTTAC
TTACGTGATACACTACGCCGTATACGTGCCCGACAGTTCACAAGGAGGTTCATTGGGGAACTTTGACCCGAAAGCCAGG
GCGAGTTCATTTGTTAATAGCAGGAGAAGGGTGGCAAACGCGACGGCGTTACAAGAGCAGCGGCAGAGGCAGATAGAAA
TAGCCAAACTGGTTGCATATCTGGAGAGAATCGGAAAGTGAAGTAAACTAAAGCATCCCTTGATGTCAGCTACGTTGTG
TTTGAAGAAAAATCTTTTTGAATAAATCGATTCCGTTCATTATACAGTTAAAAAAAAAAGGGATAACGGAAGAGCGTCG
TG
>Contig217 7295 reads, 520 bases
CTGTTATCCCTATTTTTTTTTTTTTTTTTTTCTGTGGCAAAAAAATGTAATTTATTGTGAAAGGTTGTTACAAAAGGGT
GGATAATAATAATGATGGCTGAGACGGGAATGGTGAATCATGGCGACACTTGAATTACAGCCGAATGCGATCAATGGCA
GGCGGCATTTCAAAGCAGCTCTGTTCCCTAGTGACTGAATATGACAGGGTTCGGATCCTTGCTCCTACACACCAGGACT
GGGACATCAGAGTGGTGAAGGACACTGTCACTGACGCTGCCAAGTATCGTCCTCTTGAGTTTTCCTTGACCTCTGCTGC
CAATCACAATAAGCCCCGCCCCTACCTTCTGTGCATACGTCACTATTTCATGCCATGGCTCCCCACCATGTTGACTAGC
AAATTTGGCTTCTGGAATATAGACATTGGAATAAAAACATTTCTCTTGTTCCATTCGCAAGAACAAATGTTGAATATTA
CCCTGTTATCCCTATTTTTTTTTTTTTTTTTTTTTTTTTTTTTTTT
>Contig218 9445 reads, 467 bases
CTGCTGAACCGCTCTNCCGATCTTCTCAATATCGTGATTACCCCCTGTTATCCCTATTTTTTTTTTTTTTTTTAAAATC
ATAAAGCATTTTTTTTATTAATTTCAAGTAGCATTGCCAAGAAGCTCAGAACTGGCAAGAATGGGGGAAAATATGAAGA
CTTTGTTGGGTTTGAGAGTTCTCGTCTGGCTGTGCTTGCGATGGAAGGGGGGCTTCTTTGAGTTACTCGATGATGATGC
CTTCAATCAGTAGCCGTTGTAGCTGTTTCTCCTGCTATAGCAGTCGGTGGTGACGTCCCTGCCGTTCAGGTACCATTTG
GCAGAGCACTCGTTGCAGTAATTGTCTCGACAGACGGCTTTGGGATAATTAGGACAGGATGCTCCAAACCTGGGATCAC
ACGGGGCCCTGAGGCAGTTGACAATGATGCCAGGTGGGGGACAGTAGTTGTTAGGGGCGGCAGTTACAGCCG
>Contig219 8846 reads, 685 bases
AAAAAAAATAGGGATAACAGGGTAATACAAGTATATAAATCCTATTGGGCAAGAGTGACAGTGTGTTGTTACTACAGAA
ATGGCTTACAAGTCTTTTTGCGGTCAGGCTCTTCTTGTCGTGTTCCTAGTACTTTTGGAAGCTCAGAATAGCATGGCCC
AGGACCAGATTGAAATGGATTGTGTTCCGACCATCAAACACCGCTACGACGTCTGCCCACCGACCTACTGCTGTGTTCG
GGACGAGTTCCTGCCCACCTATGTTTACTGTAAGAAGATTGGAAGCTTGGACGACAACTGTACCACTAACGAGACAGAG
TCCGAATGCCCGTGTGGCCCGGGGCTCTACTGCAGGGCTAACATCCAAGGACAGTTCCCGTCTGTGTACGGCAAGTGTG
CTGTTGACAACAACGCCACTGCCAGACCGTCGACTTCACTGATTGGTTAATTAATTTGTGTCACAGAAACAATTTTATA
CGAACGCTGCACGCGCCTAATCTATATCTATAGAGCCAAGGCCTACGGTGAGAAAGATGGAATGTGACCATCTGAAAAC
AACAATCGCTTCTTATTGTTTTATTTTTTAATGTTACTTGCAATGGAGTTTTAAAAACCCGAAATCTATACTTTCATAT
TTCTCTACATGATTTCTTGTCAAATGTTTATGTCACGTGCTTTCAGATTTGTC
>Contig220 10818 reads, 646 bases
CCTGCTGAACCGGGATAACAGGGTAATAAAAAAACTCGCCGTTTGCTTATCTTTTTCGTTGTTGGCACAAAGTGGATAT
CATTCAATCATGCAATCAATTGTCGCAAGTGTTGCCTTAATCGTCTGCTGTGTGAATGTTGTCTATGGGTTATCAGAAT
CACCCGAATACGTCTGTACCATCAATGGACAGATCGTTCCCGTCGGTCAGCCTGTGGGTAAAATTGTTGATGACTGTAA
CTATTGTAGCTGTCGACAGACTGGGTATTTCTGCACGAAGAGACCGTGTCCGCTGTACACCCCACTGGGTTGTCTCATA
GATGAAGAGCCTTACGAACACGGTGATGTCGTTCCACCAGGTATAAGTGGATGTCTCAGCTGTCATTGTTTGAATGGCA
ACCTGGCATGTACTACCTGCCCAACTTAAATGTTGATTGCTGATTTTGTGTGCAAAAAATTACCTTTGGATTTTTTTCA
ATTTCACGTATAAATTACAGAAAATTATTTTTAAAAATCATGTATCAATTTTTTTTTTCTTTTTAAAGATAGAAACGCA
TTTTGACAATTATTTTCAAATTTATTTAGGACAAAAAAATGTAACCTGCTTTGAATGCATTTAAAAGCTAAAAAAAAAT
TAAACACTAATAAA
>Contig221 9354 reads, 1267 bases
CTTGATTCAGGACTAGATCTATCTCATAGATGCAGAAAAAAACTAACACCACCTCTTTCCTCAAAAAAAAAGTTTAAAA
AAAAAACAACTAAAAATACAGGTGATTAAGTTATTTTACCTGACCTTGATCAAATTGGAATATATTTTTTATAAATTTA
TAATTTAGGGAGGGAAAAAACTTCCTTTGAACTATTGAAAACAAGACAATGATGTCAGTATTATAACACACCACAGTCG
GAAATGATAACAGGTTTTGAAGGTTTTCCAGATTGAGACCCAACAGCTTCCATCTTCTTAACTACTTCATTGTACCCTG
AAATCACTTCGCCAAAAACAACATGCTTGTTATCCAACCAAGTAGTCTTTGCTGTTGTAATAAAAAACTGTGATCCATT
TGTGTTTGGTCCGGCATTAGCCATTGACAGTAGACCTTCTTTAACATGTTTCCTGCTGAAATTTTCATCAGCAAACTTT
TCACCATAAATGCTTTTGCCTCCTGTTCCATCTCCTCTGGTAAAATCACCTCCTTTTTTATCACATCATCACCTTTACG
GACCTCGTTCCAGAATGTGGGCAGAAAGACACGATTTACAACAGTATTTTATGGGATCACTGAATTTACAGACCCTGTT
GTCTGTGGCAATATAAGTGCTGCAAGGCTTATCAGCACACGTGACAGTTGTGTCATCAACACAAAAACTTGTAATATGC
TGCTTGCAAGTGCCGCAGCAAGCTGTCATGACATCCTTGGAGTAACAGGCTGTAACATTTCTACTCGCTATGGAGGAAC
AGGTCTGGCCGTGAACAGTAGTTCCGGGGACATCAGCGCAGCTGGCCCTAGCTCCACTCCTGATGGCCCGGCATGTGGC
ACAGCAATAATAATTGACGTTTGGGTCTGAACACATGGATGGTTTGATGAAGCCAGCCGTGTAGCAGGACATCTTGTTG
ACCAGAACGTTGTGGTCAGTGCAGACACCAGGGTCGTAATTGCACGTCCCACAGCATTCACTCATATTCTTGTACGTTA
GACAGTCATCAGCCTTACACCCTGTGTAGGGGTCTCCGTACTCACAACCTGAGACATGTTTCTTTACAGCTGAACATGA
TCCACAACATTGCCGTCTAATGGCGTCGTCGTAGCAGTATCTGTTAGCAACTCTGATAGACTCCGCACAAGGAACATGG
TCCACAGTAGCTCCAGCCCAGTCACTGTACATGCAATCACCTAAAGCGGTCGTTTTCACGGCTTTACAGGATTACCCTG
TTA
>Contig222 12316 reads, 765 bases
ACCCTGTTATCCCTATTTTTTTTTTTTTTTTTGCTTTTATTTTGAGAGTTTATTTCCCATTGTGGAAACATTCACATTG
GTGCCATTTGTTGACGAAATCTGCGGGGCAGGCAACATGCTCCCAAGTGACCTCAGGGTTGTCCCAGCCCAGGCCATTT
GAAATCTGATTATTTTGGTTCTGTAGGTCAAAGTGAATCTCGTAACCATGGGTGTTGACCTGGTTGGTTCCTGGTTTGC
CAGCTTGACCGCACCATTCCCGGTTATCATTGATTGGACAGTCGTTGGTCACCAAGAAGGTGTGTGCTTGGGTGTCACG
TGGTGCCTGACCCTGACCAGGAACAAAGCCACCAGTTGGGGTGATTCTGACGCACTGTCCACAGTTTGCGCCACACCAC
TGCTTGTCTCCGCCGTTATCGAAGAATTTCTGGTTGGGGGCGGTCACCAAGTTCTGTACGTTCCAGGCGAACGGTGTGT
CTGAGTTTGGGGGTCCACAGCCACATGCTCCCCTGTCCCCTGTGTCCATCGACGTATCGTGTTGTACTGGCGCAAGGTT
TACCGTTGTATCTCAGGACACCGTGGCTGTCCTTGACACACTTTGGGGCGCCGTGCACCACACCAACAACCAAAGCTAG
AAGTATGACGTAGCCGTTCATTCCTTCTCGTTACGTTTGAGCCACTAGTTATTTAAAATCTTGTAAAATGTCCTGTCCC
TATTACCCTGTTATCCCTATTTTTTTTTTTTTTTTTTTTTTTGGGGTTTTTTTT
>Contig223 9589 reads, 753 bases
AAAAAAAAAAAAAAAAAAAAAAATAGGGATAACAGGGTAATCTACTTGTTTAAATTCAATTCGTGGTCCATCAAACGAC
TGACTGTAAGATGCTGTACGCCATCGTCCTTCTGCTTCCCGCTGTCACCTACGGCATCAACTTGAAACCGTACAACCTC
ACCGCCGCGGCCTTGTTCCTCAACATCGACTTGGACGTCAGCGGGGACATCACCAGGCCGGAACTGGACCTCAACTTTA
AGACCTACGATGCCAACAACAACGGACGTGTCAGCCGACAGGAGTACACCAACTACGTCAACAGCCACACGCCGTCCCT
GGTCCCGCTGCACGACGCCTTCTACGACATCTACGACGTGGACGGCGATGACCAGCTTGACCACCACGACTTCGACAAC
TTCTTCGCCCTGATGGACAGCAACGACGACGGGATCGTGGCCTACTTTGAGTTCGTCAGGTACTGGACAATTTTGCTGG
AGAGTTTAGAGCACCTCATTGTGCGAAACGCAGCCGTCAAGGGGACCGTGCAACCCACCTTTCAGCCAACCCAGGAGCC
CCTGACAACCCAGCAACCGCCGGCAACCCAGAAGCCTCTTCAAACTCCGACCACCCAGAAACCAAATGCGTAGAATGGA
GAGGGGGGGAAAACTCTCATTACGAAAGAAACAAAACAATGACATTATTTCTCTTTAATAAAACCTTATACGTTTACAT
CAGTCGTCACTTGAGCATCATTTCAGCAGAGCGGTTCAGCAG
>Contig224 57 reads, 177 bases
CTACACTCTTTCCCTACACGACGCTCTTCCGATCTCTTTAATTGGTCACCTAAAAGCTGCTGTATTACGTTGCCATGAC
ACCGTTGCTTGTGTAACTCAATGAATAACCGGTTTTTGGATTGGCTTTGGTGTCGTCAACCTGCCATCGGAGTTGAGAT
CGGAAGAGCGTCGTGTAGG
>Contig225 17091 reads, 838 bases
CCCTACACGACGCTCTTCCRAWAAAAAAAAAAAATAGGGATAACAGGGTAATAGACTGATCCCAAGCAGGCAACAATCA
CCAACAAAGAACTTCTCGCCGTACAACGACTTACCACAGAACATGCTCTACCTGTTCTTCCTGTTCTGTTCTTTAGCGG
CGGCCTTGCCCGGGGACAAGAGACGAGAGGCGGGTGACGTCAAAGTGTTGGTCAACAATTTAAAGGAAACAATCGCCAA
ACTCAACCAAGGTGTAAACACCAATGATCTAAATAAGGCCATTGCTGACATCATTGGTCTAGTTGATGCCATCATAGCC
AGTCCTGGAGCCCACGCTGACAAAAATCAAGTTGATGACGTCATCTCAGCCACAAGTAAAACCATCAAGAACCACGGCA
AGACAGGTAAACTATCGGCCAAAATGTGGGAGTTGTCACGTGCCATCACTATGTTGTCAGATCTGGCCAACAAATTCAA
CTCGTTAGCAGATGACGATGAGAAAGTTTACAAAGCTGCAGCTGCGGTCAAGGCCACGGGTCAAGCTATTCTGGACAGC
CTCCAAATTATTGGCGAAGACCATATAAGTTTTGATCCAAGCCAAAGAGAGAATTTCATTGAAAGTTTTGGACGTGTGA
AGCGATGGTGTGTTGGAGTCAGTTTATGGGGTGTATGCATAGGATAAGCGGCTAATGACATGGGTATTCTGGACGGAAG
TGATGAACTTTAACCTCTCCTTAGACAGCGTATTGAAAGACTTTCAATTCAGCAAGTCCCCATGAAGCCCATATTTTAT
TGTCATAAAAATAAACATCAGATACGTTAAAAAAAAAAAAAAATAGGG
>Contig226 10133 reads, 789 bases
TTCCTGCTGAACCGCTCTTCCGATCTAARGRGAATAAGTATAAAATGTGTTCCTGGTCAGACTAGGATGAATGGCCTAA
TTAATGTTTAAAATTGTCTAACCTCCTTTGCTATTATGATAAGCATTATATTTTTTGTTGTTTTTTTTGTTAAGAAAAT
AGGAATCTGTTGTTCATTTTTTCATAAAGCATAAAAGTGGTTTTGCCGGAGTGATTCACCTAACAGTTCATTGGTACTC
TTTCATTGAGCGATTTACAGTTAGAAACAACAAGGTAAAGAAATGGAAGGACCAACGTTGGCACCATTTTTACTGTTGT
TCGTAGGGTTCAGCTTGGTTCCAGCGCAAACACTGATCAGCAGTTTTACAGTCAACGGCCAGACATCAGTCCGGCTCAA
CGTTGGTGATCACTTGGAGTTCAAATGTTCATCTGCTGGGGGTGTTGTGTCGTGGACACTGAGGGGACAAGCTTCAGGG
AATTTGTTGTTGGGAAATGGGCTCATCTCATCAAGGAGCCTGACCATTGGTCACCCGGCCAGTTGTGCGGACAACGAGA
CGTACCAGTGCATCGCCAACAGCAATGGTGTCCAGGATATCAAGACGGCACACATTGAGGTCATTGGCTGCCCACTCAT
CTTTGGATAAACAAATGAAATAAACAATGGCCCGTGGTCAACTCAAGCACTGTGTTATCATTTCTTCTGAAGATGTGAT
CAGGTGTTTCAGAAGTTAACTCTGACGATTGTATCAACAGGAAATTTCAAGTATAACACACATTGAGGTCATTGGCTG
>Contig227 9266 reads, 566 bases
ATCCCTWTTTTTTTTTTATTTTTTATTCTTTAGTTAAGATCACTTTAATGCCTAATGATAATATACAGAAGTTGAGATC
AAACTATGTTAATTCTGATGACACTGTCATGTACAGTTAGTCATTCTGAAATCTTTGAGTCACTTGTTGGTGTTTCCAG
AAAGTACTGATGTAACTCTATAAGCATTCTCCCACGTGTTTAAGTGTAAGGCCAAGGTCATCTACACAAGACAAGGATC
TCATGACACACTCATTGGAATACGTCAGGTCATTGCTGGCACACACAGGTGCGTAATTGAAAGGACACGCCAGGTTACA
GTGGGCTGGTGTCACCTGGGCCAAGGACCCACTGACCGCCAGTCCAAGGAAAAATATACAAATGAACATTTTAATAGCC
ATGTTGGAGTTGTTACAGCAGCTAAGGCCCAGTGAGCAACAATCAAAATATTCGAACTCTATCTAACACAAGATTCAGT
CGGTCCTCGTACACTTAATTTTACAGATAAGCTACTAACATTTCAGTTATATACCCTGTTATCCCTATTTTTTTTTTTT
TTTTTTTAAAAAA
>Contig228 15336 reads, 552 bases
AAAAAAAAAAAAAAAATAGGGATAACAGGGTAATACTGGACCTGGAACCAGCAGGTAGATGAAACCGTTACAGGCTGAC
AACAAGTTTCACAGAATCGGACATCAAAGTAAACCATGCTGGCCGTAGTTTTACTTCTGATCGGAGCTGTCCATATTGG
TCAAGGGGCAGCTCTGCCAGCTCTACAGCCTTGTTCTTTGGTCGTCGTCAACTGTTTTGTGGCGCCATGCCAGGTCTCT
CAGTGTTCTGTGCCAGGGGCCCAGTGCGTCGATGATTACTGCGGCGGATGCAACGCCAGGTGGTACGTGGATGGCAAAG
AGGTGAGCAACCAGTGCGTGGCTTCTGAGGCGTGATGGTAACCTGGTTATCGTTTGCAAAGTCCGATGGAAGAGAGAAC
CGCGGCGTCCTGCTAGATCCCGTGAAGTTTAAACACACACACACATTAATGCTATTGACTTGTACTTGTATGCCGGGTT
AACAAAATTAAACATTTAAGAAAAGTAAATCTGCAAGTTTTGATGGAAAAAAAAAAAAAAAAATAGGGATAACAGGAA
>Contig229 7361 reads, 402 bases
AACAGGGTAATCTTATCTCCAGGAGTTTAAGTTATAAATAGCTTGTGTGCCCCGTGTGATTTAACCATTTGACACATTC
ATTCTAAGTCAACTAATATTCAACACTACAATTACAATTAAACCATGCCTACAGCCATTTCTACACTTGCAGCGGTTTT
GTTCATTCTGAACACATGTGTGCCACCATTAGAAGCAGAGGAGGATTATTATCTGGGCCGCTGTTTAACACGACTGCGC
GCTTGCCAGGAGCAAACGTTTCCGGATGCCTATGACGACGAAGTCTATTGTGCCAAAATGTGTAGACAACTATCCTATC
GTACTGGAGCGTGCATCCTAGTCACCAATGATGTGTGTCCACGTAATCGAGGCGATCGCTASAGCGTCGTGTAGGGAAA
GAGTGTA
>Contig230 7553 reads, 807 bases
CCCTGTTATCCCTATTTTTTTTTTTTTTTTTTCAGTCTGAGTTATTGAATTTACTCTGAAAGCCAATTCAAAATTTGTC
CCATGAATTGTCATTACACCAAAAGCATAAAAATCAGGAATCTAATTATGGGCTTTTCCTGGGGTCATTGCATGTCTTC
AACTGTTGTAACAAGTGAGTTGTCCTCCCCAGGACTTCAATGGCTTGCTCAAGTTCCTGAATTTTCTTCTGAGTCTCCG
GGTCACAGATATCAGTTTGAGACGCGTCGCCCTGCAGCTCTTCCGCTGCTCTGTAAAGACCCATCCCGTCTTTCCACCA
TCGGTTGGAAGAGATGCGTCTCCTTTCCTGTACGCTGACGTTCTCCTTTTCCCATTGCGTATGGTCTCTCTTTCCAATA
ATGCCCTTCACAACTTTACCCACGGCATAATTGAAAGCTGCTTTCTTCACGCCTTTCCAAACCTTCTTGAAGAAACCCC
TTTTGGTGCGCTGGGGATTTGACTGGTCTTCGTTATCGGGAGAAAATGCCTGACACACTGTCTTCGCTGCGTTGTCCAC
AGCCGTTTCCACTTTTTGGTCCACTTCTTTCTCTAAGTCCTGATCGGGTTCATTTTGACATGTCACGCTTGCTGCCAGA
ACGAGCAGAGCCAACAGACTTGTGAATGTGGTCAGCTTCATGCTGAGGAGTTTCTTCGAATCAGGGAAGAAACTGATGA
CGGCTTATTTTATTACCCTGTTATCCCTATTTTTTTTTTTTTTTTTCGGTCATATTTTATTTTTAAAGAACATGTTGGT
TTTTATTTAACATAAGC
>Contig231 7164 reads, 465 bases
AAAAAAAAAAATAGGGATAACAGGGTAATGGGTAAGTCCAGATGTTATCTTGCGGTGTACAAATATAAGTTGACACCTT
CAGTTTAGGTTGATCATGATGAAAGTCATTCTGTTTGCCTGTGTCCTGGCACTAGCCATTGTCGTTTGCCAAGGTGTCA
GCTTCCTATGGTGCAGCTCCTGTAATATAGGCGACGTGTTTTGTAACGCCAACTGTATCGGACTGCCCAACACAATCCT
GAAGAAGTCAATCTGTCCATGTACATTCTTTGACCCCCAGTGTCTCAAAGACTGCACTCTGTGGGAATGACACAGACAT
GGTTGTCATGGCAATGAGAAAGTTGACAGAATATTCAGTTCTCTTCTTAGCATCAAAACAAATTTTTAAACATTTTAAT
ATTCTTAAAAATAAAAGATTCAATCCAACTACTTAAAAAAAAAAAAAAAAATAGGGATAACAGGGTAATA
>Contig232 21288 reads, 773 bases
AAAAAAAATAGGGATAACAGGGTAATCACTCAAACTGCTAGCCGTGAAACTAAGGGGGAAAATGAGAACTTTAGTGATT
TCAAGTTTTGCCTTTTTTGCTCTTGTTGGTGCAGCAAAAGGTGCAGCCATGTATGGAATGGGTGATTGCCCAGACAACC
ATGTTGACGGAGACTCGTGGGGACTGCCCGGATGTCAAGTTTGTGATTGTTACGATGGCTACTACGGTTGCTATGGATG
TGGTGTCATGGCTTTCGAATACGACAGGAAAGAATGCTACCTCCAAGAAAACCCCGACAAGAGCTACCCCAAATGCTGC
ATGCCACTACTCAAGTGCAGAGGTGACGATGGATTTGATGAGTCACAACTACGACCAGAGGCGGATCAGGCCAGGGAGC
CACCCTTCGTCATAGATTACATCAACCCCAGTGACGAGCCAGTCTACGTCCTGGACCCGGTATTCACCCAAGAACCAGT
TCCCGTGACAGACGAGCAGTTATTCTTTGTGGACCCTCATCCTGCTCCCATTGCCATGCACAAACCCCCTGCTCCTGAG
ACCGGTGTGGATCCAGTTTACACGGAAGAACCTGCTTCAGAGGAACCTGTTCCCAATGCTTCATAGGAACCTGTTCCCA
ATGTTCCAGAATAAAGTTGTATTTTGGATATAACAGCCAACACTCAATGAGATTGTTATAAATAAAAAACTCGTAAATA
AAAAACAAAAAAAAAAAAAAAAAAAAAAAAAAATAGGGATAACAGGGCGCCCTATTTTTTTT
>Contig233 15153 reads, 879 bases
AACAGGGTAATAAAAAAAAAAAGTTCCGCTTCACTGAAGCGTGCAGGAACGAATGGAATGATCCCTGTGAACCAGTTTG
ACACCCATGGCTGATACCTCACGTACTGCTGTGTTGTTATAGACGCAGATGTATTCGCTATTTAAGCTTGTCACCATCT
AGGTCAACGGATGAGTCCCTCGGTTATATCCTTATTGGTCATTGTGTGTGCGTTGACCGCTGTGACGTGTGATGTCAAC
TGGATGACCCCAATAAACTCGGCGTGGACCTTCGAATGCCCAGATGGTCATGACTTGAGAATCCTACAGTCAGCAAGTA
TTCCCTACACCCATGATAGACAGTGGACCTTCACCTGCAGTGATGACCACCCTGCACTCATCAACGCTTCCTGTGAGTG
GAGTGCCTACGTCAATGACTTCAATCAAATGTTCAACTTTCAATGTCCTGATGAGGGAGTTGTGACAGGCGTAGCTGCA
TACCATGGGGGTAACGTTGACCGGTGGTTCCAGTTTCGATGTTGTTTCCCTGAAGGGTACATCGCTCACGCCTGTGTCT
TCACACCTGACCTCAACAGCCTTGGGGGGTTCATGAACTATCGCGTACAAGAGAGATGGTACATCCGGGGCTTCAGCAG
TCAGTTCTATCAAATGCCCAATGGCTACTATGACCGTGTGTTCAGTCTCAACGTTTGCAAAGTGAACAAGCTCTCACCG
ACTTGAATTGTCCGTGCTGTAAAGCATTTGTTCATTCATGTCAATATTAAACTTTGCTTTTTTTGACAAAAAAAAAAAA
AAAAATAGGGATAACAGGCGTGTACCAACATACAACTGGCTCCTACGAAGGCGGTCATGCCGTGAAGATSATCGAGATC
GGAAGAGCGG
>Contig234 8254 reads, 760 bases
TTTTAAATTCTGGGTCAAAAGCACTTAGGAAGTAAAAATATTNCCCCTGTTATCCCTATTTTTTTTTTTTTTTTTACTT
CATCGAACATTTATTATGTTGCTAAGTTCATATACAATTCTGGGAAAACGAACTCAGAGGAAGGATTTTCTAATTTAAT
TGTTTTTGTTGCCTGAAGGCTAAAGGTGTTTAACCACTAGGGCAGTTTTTCTCGTCCCATCCGTTACCACAGTCGTCAT
AACCGTCACATTTCCATCCCTCTTCGATGCAAAGAAAGTTGTCGCACTTTATTTCCCCTGCAATGCACTGGAAGTGTTC
ACAATCTGTCTCATCTGAAGAATCATCACAGTCTTTTGTACCATCACAGACAAAGTCTTTAGAGATGCATTGTTTGTTT
TTACAGCTGAACTGGTTGGCATGGGAACAGTCAGTTGGACAATTGATTCCCTCATCCGAGCCATCGTCACAGTCCTTCT
CTATGTCACACACCCATTTGATTGGGATGCACGTCGCTTCAGTCTTACAAGGAAACTCATTGGAGCCACACGTAATTCT
CTTGGTGCGTGCGTAGTATTTATCATTTCTCGCAGCATTGACCACAGTTAAGGCAATGACCAAAATGGCCCCAAAAACA
ATCTTAGACGACATAATTACGGTTTTAAAACTACAATATTACTCTTTGCGAACACAGCAGACGACTTTTATAGGATCAC
ATGTTTGACACAAATACCCGAAGAGCGTCGTGTAGGGAAAGAGTGTAGA
>Contig235 925 reads, 419 bases
CTACACGACGCTCTTCCAATCAAAAAAAAATAGGGATAACAGGGTAATCCACCTTACATCCAGGCTTTACTGACTTTCT
GATTTTGTCTTTCCTAAGACCGCAACTCTCAGACCCAAAATGGACTCAGGATTCTTTGGCACATGGGAAGTTGACAACT
CCAAGACAACAGGGCTGGAGGATTTCGGCAAGGTCATGGGCTTTTCCGAAGAAAAAATCCAGAAATACAAGGAGCTTCA
GTACTCGTTCACAATCAGCTTAGATGGTGAAACTTACAAGTCTATTGATGGCTACACCGCAAAATTGACCCTGTCAGTG
GCAGATGGCAAATCAGTTGAGACATACGTCTACGCCGAGAAGTCCTTGACCTGGACAGTCACCAGGACAGTGGAGGGWC
ACTTCCGAGAAAGATGCAGTTGCT
>Contig236 10712 reads, 1103 bases
AAAADAAAAAAAATAGGGATAACAGGGTATATCCGTCCCTTTCTCGGCGAGAATTAGGCCGTTATTCTTGTGCTAACGC
TGCTTTTACTCTGACGAAGAAAAGAAATGGGAGTCGAAGTTGAATCTCTCAAGCCTGGCGATGGTCAAACATTTGCTAA
AAAGGGAGACACAGTTGTGGTCCATTACACAGGAACACTAACAAATGGCAAGAAATTTGATTCCTCAAGGGACCGTGGC
AAGCCATTTGAGACCAAGATTGGAGTTGGGCAAGTTATCAAAGGTTGGGATGAAGGATTCACTCAGTTGAGCAAAGGTG
AAAGGGCCAAGCTTACCATCTCTCCAGACTATGCTTATGGGGAAAAGGGAGCATCAGGTGTAATCCCACCGAATGCAAC
ATTGATCTTCGATGTAGAGCTTATTGATATAAAAAGAAAGTAGACATTGAGATACACAGTGATGACACTTAGGACTAAA
TGTTAAACTGACTTCATCTCGCTGCATCATATTTTATATTTATAACTCATTAAAAATCTCACTGGTTTATGCACTCAAT
ATTTGACAATGTTCGTTAAAGCACATTTTTAAATAGTACTAAATTAAATACAGAAGTCAATTAAATAGTGAGTGCTCTA
CTCTAATCTGAAAGAAATGTTCTTCTATCACACTATCAGTATATTAGCCCCATAATAGACTCCTTTCATGTTAGCAATT
TCATTAAAATTGTGTAAGGTATTCTTCAATTTATATTTATATCTTTCCTTTATAACCACCATTTTTGTTTTCTGGAAAA
TCTGTTATCAATTTATACTTATGATTAGCCTTCACAATGTTCAATGCTTGAATTGCTTGGGAATTACAATTGGAAAAAT
AATTGTTACATTGTTGGGTTATGACTGATATATTAATGTGGCATATTTTTAAAATAAGGAAATGGAAATTCATTTTTGG
ACTGCATTTCTACATTCTCATTCTCTGTGGTGATTATGGATTATTTTATGTCCTTAAAGTGTACAAGGCTCAGATAAGA
ACTTTAATAAATGTTACTAAATGTGAAAAAAAAAAAAAAAAAAATAGGGATAACAGGGTAATCATTTGACAGCCTG
>Contig237 14261 reads, 1231 bases
ACAGGATATTGTCACGGCCACCCTCAATTTTTCATGGAGCTCCTTCTTNGTCGNGTANNNTNGCATATCGATTACCCTG
TTATCCCTATTTTTTTTTTTTTTTTTGACAGTAAATACACAAATATGTTTTATTACTTTGTGTATGTGTAAACAATAAA
ATCTGAGTTATTGAAGTTGTGTAGGATATAAAGATTACAGATGATCAAGAGGGATTATGTTAATAGAACAAAAAACTTG
TTTGTGTTGAAAATTGTCAAGATTTCCTTGAAAACTGTCAGGCAGTAGTGATGCATAAGCTGCCGTGGTTGTCAAAAAC
GCACGCTTTGAGCGCAGCGTCGAAGGTCAGCCCGGCTGGACAAGAGAGGATCGAAGTACTCATAAATGTGCAATCGATG
AATTTGTGACAGTCCCCAGGGTGGGGATGGATTCCATTGGAAAACATCATGTCACGGCAATAATTGGTATAATCTGTGG
ACCGACCTCCAATTTGACAAAGGCGCTGGGCAACACTTCCAAGGATCTTGTATAGATCTCCATAGCTAGCTACTGTGAA
CATGTTCCTTGACTCACTAGCCAGTGTAGCCAACTCAGATGCGTCCACGTCACTTCCTATGCCAATAGAGATCATATGA
TAGCCCAAGTCTTTCAATCGTTGGGCTGCAGTTTTAGTCTGATCTGGATTATTAGACTGGCCATCTGTCAGAACAACAA
CAATATGTGGAGCGTTCACCCTGCCCCCATTTGCACTACTGAACATGCCCGTGTTTTGTATGTAGGTCAGAGCCCCGGC
TGTGTTTGTGGAGCCTGCCAGGTAGCTGGCACCAAGCAATGCCTGCTCTATACTTGTTATAGTGTTGAGATTGCCCAAG
TCAAAGAGCTTTTGCACAGTTGTACCGAAAATTTCGGCACCTATCCTGACGTTACTGGGTCCGATGGGGAAGCTTTTTG
ATATATTCGCAGCGAATTGTAGTTGATTGATATAATTGGAATAGCCAATACTAGCAGAAGAGTCGATTGCCAAGATCAC
ATCTGCATAAGCTCCGGCACAAATGACTGAAACTGCTGGTTGTATCAGGCAGACGACACCAAAGATAATTCCAAGAGCA
ACCATCTTGAGGCCTTTCAAACATAAGACATTACCCTGTTATCCCTATTTTTTTTATTTTTTTTTTTTTTTTTTTGCAT
TATGTCGTTTTCGTTTATTGTTCAAGAAAGAATCTTTCACCGTGTG
>Contig238 8039 reads, 933 bases
TTCCGATMWAAAAAAAAAATAGGGATAACAGGGTAATATCACACACTAATGATGTGTGCAGTTGTCCAGGCCTTAGATT
AGTTTAACACACGGAGATACAACAGAAACGATAACGAAAGACACAATTAAAGGGAAGAGTTGATTGTTTTTAAACAGAT
AGCTTTTATTATCATTGCAATCACAGAACGGTGGCTGCTGTTGGACAGACTTGGCAATACTACAAGAAGTTACAGAGTT
AAGATGAATCTACTCGTTTTAGCTGTCGGAATCGTTTTGTTTGCTTCAAGTGTTTCAGGGGAGTACTGCACCTACAACC
CGTACACGGGGTACTCATCCACTGTGTACTGTGCTTGGGGATGTTGCTACTCGTACATCTATCCTTGCTGTGACACGCC
TTTCTACTCAGACACACCATTCATAGCAGGGACTTGCACAGCTGCAGCATTCATTGTCATCGCCGCCATCGTGGGAATC
TGCATCAGGCACAGAAGGCGTGTTCAGACAACCATCCAGTATACCAGCCCTGGGGCACAGCAGGTCTTCTCTACATCAA
TGAACACAAGCAGTAACATATCCACTGGCTACTCTCCCCCTGTGACGGGCTTTGCTAATAACGGTTACAGGGCCTACTA
AATTGTCGTCTGCCTGCTGTGACGGACGATTTGACGGGGCTCAAACACCTACAGCCACATGGATATTTATTTGAAATTC
GTTTTGTAATTCATTTTGTAAAATCATTGTATGAAGCTTGTAATAAACTTGAGAAAGACGAGAAAGGTATTGTGTGTTG
AAATAACGTGCATAAAACTAATACTAATAATACTAATATCAAAAGTCCAGCAGTGTGGGTGGAAACAATTAAGAACAGT
GAACAGTGCTTCTCAAAATTTCACTTATATAAAATTTCGAGCTAAAATAACATTCATGGAATTT
>Contig239 7191 reads, 671 bases
AAAAAAAAAAAAAAAATAGGGATAACAGGGTAATGTTACTTGTTTTACTCCAGCGCTGCGTGGCCAGGTAAAAAAATGA
AGTTGGTTATTTTTGCCATAGCGTGTTTCCTCCATATTGGTCTTCTCGTGTCGATTCCTTTTGGTGACCCATGCAGTAC
CAGTGCCATCAGCCGTCTCTCGGGTCCCGAAGAAGTCGCTGAGGTGAACATCCCAAAGAATTGTACTTCCGGTGAGATC
GACTGGCACTACCCCAGGGGCTCTCTCCATGTCAAACTCTCTAAACCCAGTCTAACTTACTCGCTGTGTGTTGTAGAAG
GCTGGGCCACTTGGATACAGGGGGTTCGAGAATTGACCGGAGGTGTCAATAACACACTCAACTTGCCAACTTCCGGACA
TCCGGCTTGTACGAAGGCTGTCGACGGGAATACAGAGTTACTGGTCTTGGCAGAGGATACGCTATTTTACATGATTTCA
TTTAACTACACAGTTATTGGGAAATAGACATCATTAGAGTCAGATTTTGAAAATAACAGAAAATCTTTTTAAAACATTT
GAATTGATTTAATGAAGATAATAAAAAATGGTATTTGGAATTTAAAAAAAAAAAAAAAAAAATAGGGATAACAGGGTAA
TATGNCCACCCTANCGTCNANAGTGCTCTCTTAAAAGAA
>Contig240 5410 reads, 529 bases
TTTGGGTACGCAATTGTCTAAGGTTTCGATTTCACCACTGTCCCCAACTCCTGTTATCCCTATTTTTTTTTTTTTTTTT
TTTTAAAATATGTCATAATTTTAATGAAATTTTCAAATTGGTTTAGTTTATTTTAGACTTCAGAATTTCTTCGATTCGA
GCCAAACGATTTTGTAACCGAACCATTTCAAGTGCCTGCTCTAGATGTTTCTGTATAAGATGCGTCATCTCGTTCTGTA
GGCGATCACGTTCTGCGACTAGGCGAGCACGTTCTGCTAGGCGATAACGTTCTGCTAGGTGATCACGTTCTGCTTGGCG
ATCACTTTCTGCAAGGTCATCAGAAGTGATTTCATATGGCTTTGTGGTTTTCGGGGAGGAAACCATTTTACTGCCCTTG
GGAGACATAACAAACTGGAAATCAAGTAATGTATCAATTGAAACAATAAAAATGCTTGGCTTGATGATCAAGGCTGATT
TGCACTACAAAACCGTTTGTTCAATTTCATTACCCTGTTATCCCTATTTTTTTTT
>Contig241 12248 reads, 793 bases
CTGAATCTAGATAACCTATATTTTCTCAAGCTAAGCTTTCTCCTATCAAACGAATCTTTACCCTACGAACACTTTTTTT
AATTCACTTGTGTTTATCAGATAAAATTGTCAGTGCAACAATCCGAGTAACTCTAGTGGTTTGATTGCACGTACAAAGT
GCAGATATATCAAGGGTATCTGATCTCTGTACCGAGGCAGCAGTAAACCTTGAGCTGTAGCAGATCTGTAGGATTTATA
CCGTTGGGCGGCAATTATTCAGAGGTGTGACAGGTCATCGTGTGACAGTTTATTGTGTGACAGTTCATCATGGTGGACC
AACTCTTGGGACATTGGAAGTTGGAGAAGAATGAAGGATTCGACGAGTACATGAAAGCAGTTGGAGTCAACAAGCTGCT
ACGTGTGACAGGCAACAACATCACAAGCTACGAGGAGATCACACGTGACGGGGACAACTGGACCATTCACATCACGTCC
ACCTTCAAGAACACCAAGCTGACCTTCACACTCGGACAGCCGTTCTCTGAGGAGACATTGGACGGTAGGAAAGTTACGA
ACACGTTCACAATAGAGGGAGATAAGCTGGTCGCTGACCAACAACCGACAAAGGACAAAGAACTACCGTCACGCTTTGA
GAGAGAGTTGTTGCCCGATGGTCGCATGGTCTTGACTTGCACGTGCATCAACAGCGAGAAGGGCAACGTCACAGCTAAA
CGTTATTTTATCCGGTACAAGCCATAGCTGGACAAGCCATAGCTGGACAAGCCATAGCTGGACAAGCCATRKSTGGGCC
GAC
>Contig242 9962 reads, 1348 bases
AAAAAAATAAGGATMMCAGGGTAATGTTCTTATCTTTGAGACCATCAGCAGGACAGTCAACATGCTGCACATTCCTCTA
ATTTGTCTGGCTGTGGCCAGTTCATTGGTCAGTGGGGACCAACAACAACAACTGGCCCTGTCATCGGCAGCTTCAGCTT
TTTCTCAGCAACTGTATCAGCAAGTTGCTCTGGACAAACCCAACGTCATCTATTCACCTTACAGCATTCACTCTGCCCT
GTCAATGACGTCACTCGGTGCCCGAGGTGACACTGCCACTGAAATAGCTCAAACTCTGGGTGTGACGTCACTGGGAGCG
TCGACTCACCTGGCTTACAAGGAACTCATCCAACAGCTGAACGCTGTCACGGACGTGGCCCTGAACACTGGCAACGCCA
TTTTTGTCAACCCGTATTACAACCTGGTACCCCAATTTGTGGAGGACGTCACTAACGACTACCTGGCCAAGACGTCCAA
CATTGACCTTGCTGCACCAGGTGGACCAGAACAACCAATTAATGACTACATCGCCGCCAAGACGGAAAACATGATCCAG
AATGTCTTACCTAGAGGGAGCATTGATGCCAGCACTGTCATGATATTGGTGAACACAATTTTCTTCAATGGAACATGGG
AACATCAGTTCTCAAAATACAAGACTGTCAGCCAGGACTTTCATCAAGTGGGAGGAGCTAGTCCAAAGAAAGTGGACAT
GATGCACGACGAGAGAACAATCAGGATAAAGAGGGACAACTCTAATGGCGTCGACGTGGCTGAGCTCCCCTTCAAAGGT
GGCAGGTTCAGTTTGTACATCGCTCTGCCTCAGAAAGTTGACGGCATCTCAGATTTAGAAAACCTCCTGGCCACTTCAG
GCAAGGTCAATGACCTCTTCACTGGCCTGAGTCCAGTCAGACTAAACCTGGCCATTCCCAAATTTAAGATTGAGACGAC
CTTGGCCTTGATTCCTTCCCTCCAGGCTCTGGGCATGGTCAAAGCTTTCAGCCCAATGGCCGCAGATTTTACCGGCATA
ACCAAATCAGCCCAGGTGTACATAAATCAAGTAATACACAAGGCTATGATTGAAGTACAAGAGACCGGTACTGTTGCTG
CAGCTGCTACTGTCATCGGAATGGTTGCGCTGTCCGTACAACTGCCACCCAGTCAATACTTCGTGGCTGATCACCCCTT
CGTTTACTTCCTTCGGGATAACCAAACTGGCCAGATTCTCTTTCAAGGAAAATTCTCTGGCTAGATTTCCCTAATCATC
AGCGACAAATAAAGTCAGCTTTAAAACAAAAAAAAAAAAAAAAAATAGGGATAACAGGGTGGCTTAGAGCCCGTGCGCT
CGCCG
>Contig243 3668 reads, 783 bases
GTTATCCCTATTTTTTTTTTTTTTTTATTTTTAGTGAATTTCTTTTATTTGTTAAATCAGTTTATTCGACAATGGTCTT
GTGAATGTTGAACGAAATATAATTGATCACAACGATTGCTTATTTTGGATTTCGTTTGGTAAGGTTAAAAACTAAAGTC
TTGTCCCGCATGGGGCCGGGACGTTAAAAGTGTAGTCGCAGGCGTTTAGTAATTGATGGAAGACCAGGTTGGCATCACA
GTAGAATCTCCCTCTGAAACTGCCCTGAAAACACGAGTGGAAAGAAATACAACCGATGGAAACATCCGGGTAATTGCCG
TTACTCTTATCGCCGCATGGCGCCGACTGTCCACATAAAGTGCTGTTTGTGCCAATGGGAACACATTCTGCCGACTCCC
TGTCATAGACGAGTCCTAGGGTGGTACAGTTGTACGTCACTGGTACTCCGCCCTCACATCTCTTGTACCCCCAGCAGCC
GATTCTTCTGTCTCTCTCCTCAGCAATAGTTAGCTTCACGCCCTTTCCCCTGGGCAAAGATATCCAGGGTTTGTTGCCC
TTACCAATGATGAAGACATAGGACAACCTGGTGGCAAAGGTATGTCCAAGTGCATCCTTGATGTGAACAATGTCAAAGG
AACCAGGATGCCTCTCTCGATGAGTGATGGTGCCAACACGACCCAAATTGTGCCCACCGGTGATCATGACAAGATTACC
TGTATCAAACTTGATGAACTCTTTCATCTTTCCTGATCGGAAGAGCGGTTCAGCAGGAATGCCGAGACCGAT
>Contig244 1747 reads, 431 bases
CCACAACGTTGATRGGATAACAGGGTGGAATACTAACCATCTCCTACATCGTGACGCTGTGGTGCCTGCGAAAGTCTCC
AAAATGTCAAACATGAGCATCGTCCTGATATCAATGCTGGTTTTCGTAACAGGACAATTGATGGCCAATGTGATTCCAG
ATGCCTCGCCCCAGGATGACGGACTACACGTTCCTAACTACAGGAAGCGGCGAGACGATTCGGATCCTTGGAATCTATG
TCATCGTGGGATGACGAAGCTCGATTGCTTTTACGTGTACTTCGACATCTACGCCAGAATTCGGAAACAGATCGACTCA
AACTCGGGGGCCTCGAGAAGGATCGTTGGCAAACGGTAAAGCTACTCGACCACCAGCACCACCAAGACGTCATCAAGAG
ACCCAKRTSGGAAGAGCGTCGTGTAGGGAAAGAGTG
>Contig245 11000 reads, 869 bases
TATATAGCCGATAGCGTCAGGGTAATATACAAGAAGGTAACCTCATTATTCTAGACGTTAATAGTAATAGTCCGTTACG
TTTCTCCGAGGTTTCAAATTCATTGTTGAAGATGAAGACATTTCTGGGACTCACGGCCTTTCTAGCGCTCACACTGATC
AGTGAAGCAGTTGGAGATCCAGATCCCATATGTGCCAGCCCACCTGAGGGCTGGGTAGCGGAGATCGGCTGCTGGGGAA
GCAAAATCTGCAGAAATGGAACACTGGTCATCAACACCTGCCCGTCTGGAACTGTACTAGACAGAGAATCAATGACGTG
TGTTGATCCAAGTTCTAATTCCACTGACTGCGGCAAGGCAGCCGTGTGCTTGGGTCGGGCAGACGATACTTACCCGGAT
GTATCGGTGAAGTGCATCTCTTTCTTCTCGTGCGTAAACGGGGTCAACCGTGGCCGCTTCTACTGCACGCAAGGCCTTG
TCTTTGATCCTGAGAATAAAATCTGTAACTATCCTATCGATGTACTTCCACCGTGTGGCACCAAACAGGCCCCTGCGTA
AGATAGGGGTGACTTTGACTGGCCGAGAAACTATTCCTATTGAACTGCTCTGTGTGAAGGTCATTACTTTCATGAGAAA
ATCATGATGGCGCTATTAGTTGACATGTCTTGAAATTAATTTTTTAGTTTTTACAAATAAATCTCAGATTTAAGTTTTT
TATTTACAAAAAAAAAAAAAAAAAATAGGGATAACAGGGTAATAGATAATCTGAAGGATATTGTTATCTCAACATGCTC
CTCATGCAGATGGCATTTGTTTTCCGCGTCTTGACACTTGTTGTCCTTGCTGGAGGGGTTCTCGGCGACAGATCGGAAG
>Contig246 13024 reads, 588 bases
CTACACTCTTTCCCTACACGAAAAAAAATAGGGATAACAGGGTAATACACCTCGGTATCCTCTCGTTGCTTGCACATCT
CTGTTGTTGTGGTCACTGATCTACTGTCTGGACTTCCATTATAAAATGAAATTGATTGTCACAATTGGGTTGACCCTCG
TCTGTTTGAATGTTGCCTTTGGGCAATTGGCAACGACACAGCAAGTCTGTCGGATCAATTCTCAAGCCTTTGCTGTGGG
TGAGTCGGTCGGGACAGGCCTTGACGGCTGTAACAGCTGTGTCTGTCAGGCGACGTGGTTCTCCTGTACGAGGATGCTC
TGTTCGAGGTATCTGGACTGTCAGATACAGGGACAGCAATACAAGCATTTTGGCAAGGTACCATCCACTGATTGCGTAG
AATGTCGTTGTATGAATGGTAACCTGGCATGTGCCGGTTGCACAGCTTGAAACTTGTTGAATTCTGTGTGTGACAATAG
TGACATTAAAAGCATATAAAGTCTTCATTCATTTACACTTTGAATGTTTAGACAGTATAAACAATAAAGGTATTCAAAC
CCATGAAAAAAAAAAAAAAAAATAGGGATAACAGG
>Contig247 8621 reads, 1346 bases
AAAAAATAGKGATAACAGGGTAATATCCGGGGAAGTAATATCATACAGACTACACTCACTGGTCACTTACTGGTCAGAC
AACTCACAATGAATCAACTACTGTGCTTGTTTGCACTCGCTGCAGTTATCGGCATTTCAGCAGGAAGACCGGAGGGCGG
GTTCAACCCCCTGTCAAAATGCGTGAGGTTCGCTGAGGAGAACAAGGACGCACAGAACTGCACGTGCATCGGAGGTTAC
AAGGGCGACGGTGACCTGTGCTGTGTTCCCAACAGTGCTGCCCTGTGCATCTTGAGAGATGACCCTCACCTCAAGTCGA
CCAGAGACCGGAATTCCGTCATCGACTTCCCTTGTACGTACAGCGTGGCCAAGATCTCCAGTGTCGTGGGAGACCTGGA
GTGCCAGCTGGAAATTTATACAGCCGGGAACTTTATCAACTATGCCCAGTACAATGATCGCCTTGGTCTGCGGTTCTCT
ATCGGCGGGGAAGAGAAAATCTTAAAGCTCATTAGTAACGGCTTTTACGATCCTCTGGCCAAGACTTACACTGAGATGT
CCGTCGGACGGGGCCAGCAAACAGTCCGTGTGGCCAGCGCTGAGTTCCGTATGGGCTACGACTACGTTCTCAAGAGGTG
GAATGTGGCCGGTTGTGGCGGTGAACTGTTCTTCAGGGCACCCGCCAACGCTTCAGTCTTACAGGAGAGAACACCTGGC
CTATGTGTATTCGGCCCACGGAACCAAATTGTGGGAGCACCTGGCAATGGAAACATCTGCAACCTCAACGACAACTTCC
TGCCCAACCCTTACAGAAAAGTCTGGCACAGGCTGTTGGCCATTCAGCTGGACGCTCACAGTAAGATCCCAGCTCAACT
CAGAGTCGACCCAGAACCGATTGAAGACGTTTGCACTGACCTGTCCACCTACTTCGGACAATGCACCAAAGCCCGTAAG
GTCCAGGCCATTGAACTCTGCAGTCCACTGATCCACGCCCAGATGGTCAGACATTGCCTGAGCGAGAACAATTCGGACA
TCGTAGCTGCCTTCAGAGACTGCATCGTTGGCTTCTGTGGGAGAGAGAAATCTGGCTGTGATCGGCTCAAGGCCAACAC
CGGAGTCAAAAACTGTCACACGAAGGCCACTGAATGTGACGGTTGGTAAGACTTTTGACATGACGTCAACAGCTATCTC
TCAAGTTCATGGCCGTTTGGGCGGAACTTGATCCGGAAGTAAAAGATATATCTAAAGTGTTTATTTTTTAAATGAGATT
TTAAGCATTTAAATTTTCTTATTAAATAATGGGAATAAATTTAATAATAAGGAAAAAAAAAAAAAAAATAGGGATAACA
GGG
>Contig248 4313 reads, 532 bases
TTTTTTTATAGTTATACACTTTTATTTCAATCACTTGCATGCATTGAAAAAAATAATTGAAGTGAAGTTTAACTAATTA
AGCCTTAATGTATATTTATGGCTTTGGAAAATGTTCTTTTGTTTTAATTTTTAAATAACAGATAAAATATATTGTAGTT
AGAGTTTCCTTTCTAACTTTTGTACGAATCAATTTTCCCAGTGCATCTTGTCTTGGACCTTGTTGAAAATATGAGGATC
TTGTGCTTTAGATGCTACCAATGCACTTGCATTTGTAGCGATCGCCTCGATTACGTGGACACACATCATTGGTGACTAG
GATGCACTCTCCAGAACGAAAGGATATTTGTCTACAGATATTGGCACAATAGACTTGGTCGTCATAGATATCCGGCCAG
GCATACTCCTGGCAAGCGCGCAATCGATTGTAACAGCGGCCCAGATAATAATCCTCCTCTGCTTCTAATGGTGGCACAC
ATGTGTTCAGAATGASCTTGTTATCCCTATTTTTTTTTTTTTTTTTTTTTTTTTTTTT
>Contig249 766 reads, 900 bases
TTTTTTAACCAGCATCTCATGTTATGATGGATCTTAATTCTTTTTTTATATTTATACATTTATTTGTGAGAATTATATT
GTTAATATGWATGCCAGTTTTGTTCTATTCTTTTTTTGTCAAAATACTTTCCTTCAATGAAAATAACTTAGCTGTATGC
TTTAATCATAAAAATACCAACATATATTTTGTCTTTGAAAGTAATGCAACATGGAGACTGAGAGAACCCTATCATCAAA
AGGATGCAATTAGTTTGTGTTTTTATCAATTTTTTTATTGAGCACAAACCAAGAGTTCATTCAGATGTGTGTTTTAAAT
AAGAAAACTTGTGCACTTGCCCTACTTGTGCACTTGCCCTACTTGTGCACTTGCCCTACTTGTGCACTTGCCCTACTTG
TGCACTTGCCCTACTTGTGCACTTGCCCTACTTGTGCACTTGCCCTACTTGTGCACTTGCCCTACTTGTGAAACAAGCT
CATGCTGTGGAGTCTCAACTCTTTGAACGTGAAAGGATTACACAGTTATTTCCCTCTTCTTTTATAAGGTGAACATATC
AGTCTCTTGAGGCATGAACAACAATTTTATTTTAAAAATGTGTTTCTGAACATTTTTGTTTCTGGAAAAATTAAAAGTT
GATATCAAATTGGAAACATACATTTCTATAAGACTTTTGTAAAGTAAATATCAAATAATTTTCCACTTAAATCCATGTG
CCAAMAAGTTTTGAGTTGTTTTTATTGATGGTCCTATGTCTACCAGAAAACACATTCATTAGATTCTATATACAAAATG
TGTGACCCTAAATGAACATTATCATTCATGACAAACTACGACTATGAAAAACTAAACAATTAGATATCAGATAAAATGG
TTAGTTACTTTAAACATTCATGTATGTAAAT
>Contig250 13468 reads, 793 bases
TCCCTATTTTTTTTTTTTATTTTATATTATTCAGTTTATTTCATAGTTGCTTTACAACACTCGTTTCTTTAGATAGGCT
CATTAATATTTGCTCTAAATGGATTCAAAGTAACACATGTTCTCCCTAAACTTTGTCTTGACAAACATGACTCGTCGAT
GTTGACTGACTGACGTCAAATGAGGTTGCACACCAGTGCACACCTAGCATTGTCCCCACACACAGTGCAGTCCCTTTTC
CCGATCACTTCGCCAGGGTTGGTGCACACGCTCCAGCACCCGATTTGGAAGGTGCCGCACGCCTGACAGAGTTGTCGCC
TGTAGAGCTGTGCGGCTCTCTTTCCACTGACCGCGTGACATGCGGTACTGCATACTTGGTCCGAGCCACATAAGAAGCA
CATATCGAGTTGCAGTTGTCTTTTGTCGACTAAGGAATCTCTTTTCCCACTGAGCGCGTGGCATGCGGCACTGCATACA
TCGTCAGAGCCACACAAGAAGCACATATCGAGTTGCAGTTGCCTTTTGTCGACCAATGAATCTCTTTTCTCACTGACCG
CATGACACGCGGAACTACATACTCGGTCAGAGCCACACAGTATGCACAGATCTAAGGCTAAGCCAGAGACGCACACAAG
AAAGGCCGCAAGAAGAGATATCCTCGGCAACATGCTGTTAAACATTGTCAAAACTCGCTGGATCGTAGAGCACTGTCAA
CCAATTAAACCAGACAAAATGAAGAGCACGAGAAGACTGGATAACTGTATAAGCTTGCGATGCACAAAATCCAACATTA
CCC
>Contig251 429 reads, 246 bases
TATCCCTAGCCTATAGAATTGTAATACACTCACTATAGGCTAGGGATAACAGGGTAATCTTTTTCTTAATTCTATCCAA
CATGGGTCGCATGCACAATCCTGGTAAGGGTATATCCCAGAGTGCTCTACCATACAGAAGAACTGTACCTGTTTGGCTT
AAACTACCAGCTGAAGATGTAGAGGAACAGATATACAAATTGGCCAAAAAGGGATTGACCCCCTCTCAGATTGGTGAGA
TCGGAAGAG
>Contig252 263 reads, 277 bases
AAAAATTTTGAATAAACAAAAATCTGACAATTTTAATGTAAATTTTCCACACCACACACAAAAGCTCACACCACAGACA
ACAGCTCACACCACAGACAACAGCTCACACCACAGACAACAGCTCACACCACAGACAACAGCTCACACCACAGACAACA
GCTCACACCACAGACAACAGCTCACACCACAGACAACAGCTCACACCACAGACAACAGCTCACACCACAGACAACAGCC
CACACCACAGACAACAGCCCACACCACCACGATCCCAACC
>Contig253 16018 reads, 569 bases
ATTACCCTGTTATCCCTATTTTTTTTTTTTTTTTTTGAATTTTAAAAAAAATTTAATATTGCATTTCAAAGTTATAATA
CAAGAAAGTATTTGTCATTCTGAGGTTGTATGGGTTAATTAAAATAGGCGTTCCAGTTGAATCTGAATTCTCGTTCACT
GACGGTTCCATCACCGTTCTCATCCCAGAGTCTGAAGATGTGTGGGAAGTCCTGTGAGTTGAGGACCTCATCAGCTACT
CTGTCCAACTCAAGGAAGAAAAGTGGAGCGTTTTGTGGGTTGGGGAATCCCTCTTGTCTCCAGCTGCTGTCAAACTCTT
GTTTGCTCACCTGGCCGTCACCGTTATCATCAAAGTGAAGCCAGAATCTGTTCAGCTCAGCTTGTGTCAAAGTGTTGTC
ATTGCCAGCATATTGGTTGAATATTCTGTCCAAATTGGCGCCACCACCTCCTGGCTGAGCCACCACGCAGGCAAAGAGA
GCAAGAGCTGCAACAACAATGTTTCTCATGATGATTTCTTGGGCAAGTAGGCCTAACAGTATTACCCTGTTATCCCTAT
TTTTTTTTTTTTTTTT
>Contig254 27 reads, 151 bases
TCTACACTCNNNCCCTNCNCGACGCTCTTCCTCTCTCGATGAGTGATGGTGCCAACACGACCCAAATTGTGCCCACCGG
TGATCATGACAAGATTACCTGTATCAAACTTGATGAACTCTTTCATCTTTCCTGAAGCAATGTCAATTACCC
>Contig255 8665 reads, 582 bases
CTTATTACCCTGTTATCCCTATTTTTTTTTTTTTTTTTTTTAATTGTAAACAAATCCCACAGTTTATTGTAACCGTGAG
CCTGATGTATAGGTCAAGTCTTGACGGGTTGGTAGAGCAAAGACATCTCAGGGCCTTGTAATCACAACGTGAGACCCGT
TACAAGTTTGTGTTACAATGTACCAACTAGACCTGTAACTGGGACACAGCTGTGACACAGTCCATCAAACACACAAACT
GACCCAGGGTCACAGGATCCGAACCCAAGTTGTCTGAGGAGCATGTCTGCGTTACACGGTCGCAAGCAGGCGATCTGAC
GCTCGGTTAAGAGGGGCGAACATTTTTGAGAGCATCCAATCTGTAAACACTCCATGCCTGCAGAACACGTGTCCAAATC
CACCTGATCGCTGGGGTGACATTCCTGGACACAGTCTTCAAGGTCAGCTCTGACCACAGCTCCAATAATTATTATTAAG
AACACAAGAAATACACAGTGAGTCTTCATTGTAGCTTGATGTAAGAACTCTCTAATCTATGAGAACACAACAGATTACC
CTGTTATCCCTATTTTTTTTTTTTTTTTT
>Contig256 7711 reads, 613 bases
TTTTTTTATAAATATTTTAAATTTATTTATTGTTTCCTTTTTTTATGATTCAAAGATACATGAATGCTTAACACTTCAT
TTTAAGATACAAAATAGGTACATGGATTAACAACTTCTCGAATCTAACCAAGAACTGTGACTGCTCCACTGAACCATCT
TGAGAACTCAGCTTGTGTGGCCTGACCGTCGTTGTTGGCGTCCACCACGTTAAACAAGCGGTCGTAGTCGGTGTGGTCA
AGATGGTTGTCGTTGTTAGAGTCCAGCTCATCGAACAGCTGGCGGAGCGTCCTCAGAGTCTCGGGGTCATCTCCAAACT
GGGAGTCAATGGCGGCGACGTACTCTTGCCTGGTCACTAAATGGTCATTATTGGCGTCGAGTGTCCTGAAGTAGTGGTC
AACATCGGACCTACTGAAGTGTCCATCTCCGTTACTGTCCAGCTTGTTGAAGGCAGCCACAGCCAGGGCATTGACGTCC
AATTGACCAACGGTAACAGCCGGAAGGGCAATAAAAAGGGCGAGCAAATAGATCATTTTCCCGAGATGGCTTCGGTTAA
TTTCACCAAAATGTAAGTGGATATTACCCTGTTATCCCTATTTTTTTTTTTTTTTTTTTT
>Contig257 6482 reads, 829 bases
AAAATAGGGATAACAGGGTAACAGGTTTAGAGTTGTATAGATGACATTTCTATACGGCATCTGTGCTTAGCTTTTCTTA
GTGTTTTTCTGTTACTGTTACGTCCTGAAGGCTGTATCAACAACTCCACCATCAGTAGTGTCTGGCCTGCCGCAATACA
TGGGAAAACATTGAGGGGACTTATAGTCCTAGTTGAAGGGACATGGACACGTACACCTAGTTAAGGAGACATGTACACC
TATTCGCGACAACTCAGTGCTCCTTACCAGCTCTATTGTTACCTTGTTTGACTTTGATTGTTTGGAACATTACATTATT
ACATTATACTTGAAAAAAAAAAAAAAAAAAAATAGGGATAACAGGGTAATCTGTCGGAACTTGCGAAAAACTCCAAACA
AAAGAAATATATCTTTATCCAACATGAAGTTCGTGGTTACATCCCTTTTCGTGTGTATCTGCCTGATGCTGTCAGAGAG
CTGTATCTACAATGGTCGTCGTTATAAGCCTGGTGAGAGATATGAGATTGACCCCTGCACAAAGTGTCAATGTGGCGAA
AACAATCGACCCAGTTGTTTAGCTGTCATGTGTGGCTGGCCACGTTGTGAAAACCAAGTGCGGCCCATTGTTAGACCAG
GGGACTGCTGCCCCTCTTGTCCAGATGTTTAGAGTTCATCCTCAAAGTGGACTGAAGACTTACAGAAATAATCGTCAAC
TTCATCAAATTTTCATAACACTCATAATGTCATAAAATCACTTTTTGAAAATACTTTCCCATTGAAAAATAATATTAAA
TAATATTTACAAAAATTGCCAAGAAATAAACAATTCAAA
>Contig258 7457 reads, 769 bases
AAAAAAAATAGGGATAACAGGGTAATGTTATTTCACCAGCAGACGACTGTCGTTAAAACAAAAGAAGGGTTTCCAGAGC
CTAAAAAATTTGGATAACGGACTTTGTTGAATTTTCTTTACTTGTCTACATTAGCTGAAATAAACTTCCACGATGGGCT
ACGAATTGGACATGGTCAACAGGGACCCCAACGGACTCAATGACCACGTCAAGGTCCTGTTTGAAGAAGTCCTCGCTGA
GCCGGACGGCGCCCACTCCATCAACTGTGTCTGGAACTGTGCCTACAAATGTTTCAACTGCTGGAAAGGTTGCTGCTAC
AAGACCATGACCTTGCTCTGTGGCATCCCTCTGGCCATGTGCTGGGGTTGCGAGTTCGCGTACATCACCTTCTGGCACG
TGTGGTACGTGACCCCATGCATGAGGGCCTACATGATCAACTGCGGATGTCTACAGAAGTTCTACGGCACCTGTCTGCA
ATGTTACCTCCAGCCGTTGTGTGAGGCTTTCAGCTACTGCCTCAGTAACATTAAAGTAACAAATATGTCTGGATGATGA
CGTAAGAAAACAGTTATCACGTGATACGAGCCGTGCAAACTTTAACTGAACTTCCACCCCAGAGATCACATACGTGTTT
ACCTTACAATATTTTTAACATCCAAATTTATTGATGAAAAAATCAGACAAGAATAAATCACAACAATGGTGCAAAAGAA
CCAGTCGTTTGATAAGCGAAGGATCGGAAGAGCGTCGTGTAGGGAAAGAGTGTAGATC
>Contig259 8487 reads, 1526 bases
AAAGGTGAGAGGAATAGACATCACCTNTTAGAAAAGATTGCAAACAAAAAAAAAAAAAAAAATAGGGATAACAGGGTAA
TCACTTCCTTTTCTACACTAGACATGGCTGCCGGTACTCTTTATACTTATCCCCAAAGCTTCCGGGCTAACAAGGCTCT
CATAGCCGCCCAATACAGTGGAGCTGACGTGAAAGTCGACGCGAATTTTAATTTTGGCGAGACCAACAAAACTGCAGAC
TTTTTAAAAAAGTTTCCTAATGGAAAGGTTCCAGCTTTTGAGGGAAATGATGGATTCCTACTTTCTGAAAGCAATGCAA
TTGCATATTATGTCTCAAATTCTCAACTCCATGGTGATAACAGTAAAGATGCAGCATTGATTCAACAGTGGATCAGCTT
TAGTGACAATGAGATCCTACCAGCTGCATGTACATGGGTGTTCCCTTGCTTGGGAATCACTCAATACAACAAACAGGAT
ACAGACCGTGCTAAAGACCAGATTAAAAAGGTTTTTGTTCTGTTAAATGAACATCTTCAAACACGTACCTTTGTTGTTG
GGGAAAGAGTTACACTAGCGGACATCAGCTTAGTTTGCAACTTGCAAGCTTTGTATGAGCAGGTACTTGATCCTGAATT
TCGCAAGCCTTATCAAAATGTAAACAGATGGTATGTTACAGCAGTCAATCAACCCCAATTTAAGACTGTACTTGGAGAA
GTCAAGTTAGCTGCTAAGATGGCAACTTTTGATGCTAAAAAATATCAGGAGCTTCATGGAGGCTCAGCTGCTGCAAATG
TTGGAGGTGGTGATAGCAAAAAAAAAGAAAAAAAGATAGCCCAACCCCAGCAACAGCCGAAGAAAGAAAAAGCAACCCC
TAAGCCTCAACCTGCAGCTGAAGAAGAGGATGAAGAACCCAAATCGGAATCCAAAGACCCCTTTGCTTCTTTGCCTAAA
GGTACCATGAATCTTGATGAGTTCAAGCGTGTTTACTCAAATCAAGACATCTTAACTGAAGCTATTCCCTACTTTTGGA
ACAATTTGGATCGCGAGAATTACTCAATTTGGTACTGTGAATATACAGAGAATCTAGAAGGAAAAATGACATTTATGGT
GTCTAATCTTGTCGAGGGTATGTTCCAGAGGTTGGATAAGTTCAGAAAAAATGCTTTCGGGAGCATGGTTATATTGGGA
GAATCTAAGAAGAACTCCATTGCAGGATTGTGGTTCTGGAGGTCTCCTAACCTTGCCTTCACTCTTTCTCCAGATTGGA
TGATAGATTATGAATCCTACTCATGGAAAAAACTAGACCCTGATACTGATGAGACAAAGGACTTAGTGAAGAAATTTTT
CCTTCAAGAAGGAGACTTTGGAGGAAAAGAAGTTGCTGATTCAAAAATATTCAAATAAAAAAAGATTACAAGATAATTA
TAATTTTTTTAATGTACCTATTCAGGGGGTGACTTAAAAGAAAACCAATGTTAATTTTGTCCTGTAATATTTATTTTGT
TGTAGAAAGATCGGAAGAGCGTCGT
>Contig260 3730 reads, 394 bases
CCCTGTTATCCCTATTTTTTTTTTTTTTTTTTGAAACTGAACAAAATTTATTCTCAACCCGAATCTCCTCAACCAAAAG
ACTTAAGAGGAAGAGGAGTTTTATTATTTAAGTTACGTTAAAAATGTACATCTCTATCCAATAATATGCGCAAAGCGGC
TGCAACGATTATGTGATGATGTCTCTTATGTCCAGTGAGAAACTGCTGTGGGCCAGGAGTTGAGGGTGGACTTGAGGTG
AGCCACAGACCTGTGCTGCCAATTACAAAAAAATGTGTGTGGGGGGGGGTCGTGTGGGTTAGTGTCCATAACAGGTTAA
CACGCGCCGTCATGTGTTTGGTAGATGACGAATGATGACTGCAGACAGTTGGTCAGCTGGAGCAGAACCTACAGGAAC
>Contig261 8389 reads, 612 bases
CTGTTATCCCTATTTTTTTTTTTTTTTTTTTATTGTGAAAATCATTTAATTGTGTATAGATACAGCGGTATACATTGAG
AAAGTATTAAAACATGATTTGATATAAATACATCTTTACACGCACACGTCGATTTGAGCTTTGCAGGCATCGGAATTTA
GTGGCTCGCAGATACCAGGGTTGCCGGTGGGTGGGGACAAGTTTCCAGGGGCGGCTGTAGTGAAGAGACAGTTGGGGTC
ACCCAGCTCCTCGCCATTGGTCTTGCCATCTTTATCAGAGTCCAGTTTGCATAGGGCTTGTGTCCACAGGAAGCCGGCC
GCGTCAAAGTCAACACCAAATGGGTTCAATGGGCCTCCTCCTGATGAGTTAAAATGACCAACTCCTTGCCAGGTACCTC
CAACAGGACATGGGTTGGGGACCTTGTCCCCATTAGGGATGCGGGTCCTAAAAGATGGGAAAGCTAGAACTGTTGTGAC
TACGGCCACGAAGATGACGTATTTCATCATGTTGACAGTCCTTGGATTTCTAGACACAAATGCATTACCCTGTTATCCC
TATTTTTTTTTTTTTTTTTTTWATTTTTTTTTTTTTTTTTTTTTTTTTTTTTTTTTTTT
>Contig262 9155 reads, 826 bases
AAAAAAAAAAAAAAAATAGGGATAACAGGGTAATCTCGCTGGACATTCTCTATTGTCGTCAGGCTCTTTGGCCCTCTAT
TGCGTAGTTGTTGTCAGCGTCATCGTAACAGATCAACATGTCCAGAATTTCCTTACTCTTCGGAGTCACGGCATTGGTT
GTGTTCTTGACCACTGGAACTGATGGTCAGTACTTTTACAGTCTACTGAACACACAAGCGACGGCCTTAAACACAAGCC
CGTCCATGTGCACGAGGGTGATTACCACCGCTGTCCAGAACTGCCCCAACACTGTATGCTACATGAAGTCAACCGTTGG
GAGTTGCTGCATGGGTGTCTATAGGAACGCTTACGGAGCTCTCTATCAGCAATGTGTGTGTTCAACGAATGTTCAATGC
GTTGCTGCTGTGGCCAGTGCAGTGTCCACAACAACCTCTACCACGAGCACCACCACAAGTACGACGTCAACCACCACGC
CGACAACAACAACAACCCCAACCACGACGACCACCAGCACAACGCCCACAACAACCACGACAACCACCAGTACAACGTC
TACCCCAACCACAACGAAATCAACAGTGGCGTAAAGACAACCTGTCACTAAATACGTCACCTAACAAGAGCACCCCCCT
CCCTTACAATACTCTTGGCTTCCAGTGCAGCATGCCTAATGGTTTTAAAGCAGTCTAAAACAGTGACGTCTGATCCTTT
TGCACTCACTTCCTTTGTCAAAGATGGTTAATAAAACTAATATTCGTTCAAAAMATAGTTCTTCAATACAAAAAAATCA
CTAGACTTAATTTAAAAACAATAATTTATAAGCGAG
>Contig263 10301 reads, 898 bases
CCCTGTTATCCCTATTTTTTTTTTTTTTTTTTCACCACGTGACAAATATCACTTTAATTATTTAAAGAAGCCCTTTGTT
TGAAAAGGAAGCTCGTCTTTTACTTGCTGCAGTACTGCACAATGAAATTCATTAAAAACTCACACATTGATGTAAGAAC
GTAAACGAAACAAAACGTTAAAATTCCTGCTTGTACTCGTCGGTCAACTCAAACACGACCTTGGTGCTGCAGGTGGGGT
TAGAGCAGCAGTCGGGCAGCGCGCAGCACTTCCCAGGTCGGGGTGTCGGGTACGTACACAAGTACTTACTCAAGTCTGG
GAACTGCGGACATATTCCCCGACACTGCCTGTAGAACCCGTCAGGCTTCTGTGTACACGTACACTCGTACTGGCAGCCC
TCTCTCCAGGTCTCACCTGGCAGGTGGGTCACCCCACTGGGGTCAAGGCAGTACTCTCCTGAACAAGTGTCTCCCACCA
GGATTGGACAACACTGACCCTCCTGCTTGACCTCGTTACAGCCAGGAGGCAGGCTAATGTAGTGGGGGCAAAGATCTGA
GCATTGGATGGACATGAAGGTCGAGTTGAGAGACAAACACTTGCAGCGCTTCTCACAGCCCTCCTGCCAGGTGTCTCCA
GCATTGTAGTCCTTGTTGTTGTAGTGGCAGACTTGACCAAAAGTTAATGACGTAGGCTTGATTTCTGTTTGTCCGGGAA
GATTCACCTGGAGGAGATTGCAGCAAGGGAATTCTGGGTCAGGATATGACGTGCAGTTGTAGCCAGCGGGACACACAAA
TTTGACACACATATCCGAGCAGACGTAGAGGCCGCGAGAACCGTTGATCAATTACCCTGTTATCCCTATTTTTTTTTTT
TTTTTTTTTWATTAAATTTTTAATTTTTT
>Contig264 4132 reads, 684 bases
GCTAAACAGAATTCTTGTAAAACTAATTGGATTAGTGATAHACGACTCACTATAGGCTAGGGATAACAGGGTAATCTCC
CCAAAAAAGGTCTTCTATAAAATGAGTTTACGAAAAATATATTGGATCATATGTTAATATATTTTTTTGCTTTAACAAT
TCAGTTCACTAGCAAGACGTGATGTCCGGCCACGGTGATCAGCAAGCGAAAGCAAACAATGACAACAAATCGAGTCAGT
GCAACCCTACGTCAGGGAGCTATCAAGGTCACCAAACCGGTTATACGGGAACTGGAACCCAGGCTGACCTTGGAAACCA
CTCCAACCAGTTGAACCCTAACAATTCCAACTACCAGGGAAAGAAATAGGAAATCTCAGCTATGCAGAGAAATGTGTAC
ATGTTGATCAGAGAGAAGGCGTGAAGATATCTATAAAATAGTCGGATCTAATGACTTTAACCAATCCAGGCATTTTTTA
AATATATTCATCTGAGAAATTAAAATGTTATATTCTATAAACAAAAAATATGGGAAAGCAATTTTTTCTCCTGAAAAAA
GTCCTCAAATTTTAAGCAAACCCAAGTACCCAATCCACAATGAGAAAGTAAAATAAAAAGCGAACGGCAGAGAAAAAGA
AATAAATAAAAAGTAGCCATAGTTGAGATCGGAAGAGCGGTTCAGCAGGAAT
>Contig265 4809 reads, 609 bases
AAAAAAAAAAAAAATAGGATAACAGGGTAATCTACCTTTACTGAGCCTTTCGTAAACAATCGTACTCAATGGCCAAGAA
GAGGTTTGGTTATAAATAGCATGCGCGCCCTTGTGAGTTAACACTTCGAGACCTACAATCAAAGTGAACTAATTGTCAA
CAGCGTAATAATTAAGACATGAGTAGAGTCATGACGGCGCTTGCAGCGGTGCTGCTCATTCTGAACATATGTGTGACAC
CTTCTGACACGCGATATCTGGGTTACTGTTGGCCAAGACAACGGGCTTGCCTGGAAGCAAAGTTCCCGAATCATTTGGA
TGCGAACTACAGATGCAATGACTTTTGTCGAGACATACAATTTGCAAGAGGAAACTGCGTCCTTGCTCCGCACGATATC
TGCCCCCGTGTACGAGGCGATAAATACAAATGTCTGTGCAGTTAATTCATCTAATGCACCAAATCCTCTTATTGCTGCC
AAAGTCAAGGACAAAATTTAGGGAAAATTGTTTCAAACTAAAGTTAGATAGAAAACTCCAACGCCCTCATCTCGGATGC
GCTATTCTATAATTAAAATTAAATAATATATTCCAACGCCCTCATCTCGGATGCGC
>Contig266 5934 reads, 847 bases
CCCTATTTTTTTTTTTTTTTTWTTTTGTAACACATTGAATGCCCCATAAAGGTATTCAAAGTTTTATTTCATGATTTAA
TAACTAGTTCAAAACTTTAGAATTAAAAAAGAAAAAACAAGAAATCTTAAGAAGTTGACCGAATCTTCTGTAAATCGAC
CTATTGGAGTCAAGTCAGAAAACGACTGGTTGTTTACTACAGAGGACGCAGGTCTCGTTTCTGCACCAGGCACCTGTAC
CCGCCACTTATGTTTAATATGACAAGCTGACGAAGTGTATCGCTGTCATCTAGGCAAGACTTGTCAGTGAGAATGGAAA
TGACGCATGTTGCATATCGGTCCAAAATGCCAATGAAATAGGGGGAGCAAATGTCAGCACTGCCATCGTTCCCTTCACG
CCCAGCCTCAAATTCGATCCTGAAATTCCGATCACATACTTCTATTTCAAGGCTTACTTCTTCTCTCTTGGTGGCGTTT
GTAAAACAATGAGACTGACTTATATTGTTGAGTACTTCTCTTGCTTCAGGGGAACACACAAAATCACCATTTATCACAA
GGCCAGTGTAACGTTTACTAATGCTTTCGTTATTACAATATTGCATGTTTTCGTTGACACATGCTTTGAATTCTTCTTT
CTTCTGACAGAAGTCTTCGAAAACTCCATCTTGAAAATAGTTGTTGAAAATGTCCAATGGTAAATTGCAAGACCTTAAT
TCCAAACACTCGCCATCTGACCTGGTGCTGTTGGAGGCACAGAAGCTAAAGACGCAAAACAAGGCGAAGATCAGTTTCA
GCATTTTCAATAGATAAGGAGATGAGTGGTGCTATGTAGATTACCCCTTACACCAAA
>Contig267 8790 reads, 812 bases
GATCTACACTCTTTCCCTACACGACGCTCTTCTGGTCCTTGGTTATGAGGTTTGAGCAGCAGATTTGAGCTTGAAAGTA
ATGATGTTAATCTCAGTGAAGGTCTTGATTAGTCATTGTCAAAAGGGAGGTAAGAAATATCGAGCATGGGGATCGAATC
CTGTACTAAAACAAGGGACTTCTACTGCAAGAATAAATTAAGCCTAACCCCGACGACATGTAAAGCATTGTGTTGAGTA
TTACAGCAGTCTATTCATAGATCCAGGGCTTGTTGGCGTACTCGTAATCACTTAGTTCTTCTGGCTTGAACCACAAGGC
AATTTCTCTGTTGGCAGTGTCGACTGCATCACTGCCATGGCAAATGTTGCGGCCAACATCAATACCAAAGTCACCACGG
ATGGTGCCTGGCATAGAAGCCAATGGATTGGTAGCACCCAACATCTGTCTGCCCATTTTCACAACCTCTTTCCCCTCCC
AGACCATAGCAAACACAGGTCCTGAGCTCATGTAATCAACCAGGCCATTGAAGAAAGGTTTGTCAGCTAGATCTTTGTA
GTGGATCCTCAAATGGTCTTTAGATGCCCATAATAATTTTCCGGCAACTAGCTTGTAACCACGGGCTTCAAAACGCTTG
ATGATCTCACCAATAAGTCCCCTTTGTACTCCATCGGGCTTTACGGCGATGAATGTGCGTTCTTTCCTTGGATCTGCCA
TATTCTTTGTAAATACTGAGAAGAGTGAAAGAAGTGTAGCTACCATGCGTGCGGTACCACGGCGAAAAGGGAAATATTA
CGAGAGAAGAGCGGTTCAGCAG
>Contig268 15690 reads, 910 bases
CCCTGTTATCCCTATTTTTTTTTTTTTTTTTCAATTAGGAAGCCTAAGATTTAATCAACAATAAATAATTTATAAATTA
AGTCCCCTTTTACAAAAACAACGTTCGGTTAATAGAGCGATGTGGGCTAGCTCCCATACAGAGAAGAGACACATTAGTT
CCATCCGTTGGCATGGAGCCACTTAGCCCTGGCGATGACGTCATTGCTGTAGTCGTGTCCAGTTGTGCCGGCATCCACA
CCTCCCCATGACGTCACTCGGCTAACACCACCGTTGTAACCAGCAACAGCACCTTGAAGTGCTTGACTTATTGTCCAGC
TGGGAAACTTGGCATGGACCTGATTGACGTAGGGCACCAACAGCTGGCTGACCAACATCTCAATGTGGGCACAGCTGTC
CCAGGGCACCGAGGTACATGGCAGGCCAGAGTATCGAACGTCACACTGTAAAATTCCCCAGGCATTGTGGTTGTCTCCC
CATCCACCAGTTGCAACAAGAAGAGTTCCACCCCTTGATTCCCTGCTGGCAATGGCAGCAATTAATGATGCCTGGATAC
AGTTCTTGTCTGCTGTGGCCTCGTAACAATTTCTGTGTTGCTGGAGTGCCGGTACGTCATATGCCACGTCAGCGTTAGA
GGCTGCCACACCTCCGTTTGCCTTGCCTGTAGGTTGTAGCTGGTTGATGTCGCCATGACAAGTTCTGGGCGCTGCTTGT
GACAAGGCGACGAGAGTACACAATATTATTATCTTCATTCTAGAGGACTGTCTCAGTAAACACCTTATGACTGTATGTG
GTCTTCAAACAAACCAATATGTATATCGGTAACCACACAGGTGCTTGCTGCTTTGAATAGGGACTCACTTATTTATATT
ACCCTGTTATCCCTATTTTTTTTTTTTTTTTTAACTTTTGA
>Contig269 4055 reads, 431 bases
CTGTTATCCCTATTTTTTTTTTTTTTTTTTGATTTCTAATTTATTTGGGACCAAATCATTTCTTAAGAAAGTTTCGTAA
CTGGTAAGACATCACCTAAAAGTTCTTTGCAATTATTCCATCACGCTTAGCCAGTCTGATAAGTGAATCATCTGATTCA
CCCATTCGCCTTATAGCACCGCAGATAGCATATGTCTTGTAACCACCAGTCATTCTGCCAGTTGTCTCATCAACCTCTG
CAATATTGATCTGTATAGAAGCATGGTCTTTGGCCCCAATAATACGATTACTTGCAGAACATTTGCGAGGGATCAAAAG
ATCAACGAATTCCCCAGCGTCGTTTTGCATGATTATTTATCTTCAAGCGGTCTGCCTCTTTGCTAAGATAGCGGAAGTC
AAAAGATTACCCTGTTATCCCTATTTTTTWGTGAGC
>Contig270 12906 reads, 731 bases
TTCAATTTCCCTGTTATCCCTATTTTTTTTTTTTTTTTTTGAACTTATTCCATTAACTTTATTCATTAAACAGCTTGAA
AAACCACAATGGTAGTTGTGTCTAATTTTATGCCTTGTAACCTCTGCTCTTTCTGCGACCACGAGCACGTTCAAACTTG
CGACCTTTAGAGCGGACAATGGGCGCAGTGTGGCTATGTGGTACACCAGGAGCCAATCCAAAGTGCCTGTATGCCTTGC
GAGATTTGCGAGGACCTTGAACAAGAACAGTATTTTGACCCTTTGGTGAACGAAGAGCCAGCTGATCAAATGTCAGGAT
CTCACCACCTGCTTTCAAGATGCGGCCTCTTGCACGCTCTGTGATACGAAGAGCACAAATCTTAAGCTTAGGCAAGGTG
TGAATACGAATATCATCAGTGATGGCACCTACAACCACAGCAATCTTGTCTTCACGGCCTTGCTTTTTCATCATACGAG
CAAGTTTGGAAACAGACAATGGAGGTCTGTTTGTCCTGCTCATAAAAAGTCTCTTCAGTACAACCTTGTTAAAATTGGA
GTTGGTACGTCTTGCTAGGAAACGATACAACTTCACCAATAAACGTAGGTAAATATCCTGGCTTTTGGGTTCGGTCCTA
CGGACCTTCCTGTCATATTTGTGACAGATATCAATACCCATTTTCAGAGTTTCCGACTAAAAGATTACCCTGTTATCCC
TATTTTTTTTTTTTTTTTTT
>Contig271 7151 reads, 814 bases
TTTTTTTTTTTTYKTKTTTCATTAACTACGTCATTTATTTTATTAAAGGCAGACATCTAGGGACTCGTCTACTTGACTT
AGTAACACGGGATGCTAGCGAACATTTGTGGTTGAGAGTATGGGCATCTAATCATTTGTTGTTGAGAGTATGGGCATCT
AATCATTTGTTGTTGAGAGTATGGGCATCTAATCATTTGTTGTTGAGAGTATGAGCATCTAATCATTTGTTTTTGAGAG
TATGAGCATATAATCATTTGTTACTGTACAGACGGACGACGGTTCTCAACTCGCTATCAGCAATGAAATCCCTGCCAGG
CACAATGAGGATGATCTATGGGTTCACAGATTCCTGGATGCGTAGTTGGGGCCGTAAAATCGTCCAAAGTATTTTTGGT
CCAGACACAGTTAGGGTCACCAAGTTCCTCTCCGTTGGAGATCCCATCTCTGTCGGAATCTTGGAAGCAAAGAGTCTGG
GTCCAGACATGACCAGCCGCAGCAAAGTCCAGTCCAAACTCATTTCTAGGTCCAGTTCCATTAGAGTTGAAGTGACCGA
CTCCTGGCCACTGCCCAATTCTGCAAGGGTGCGGCACGCGGTCCCCATTGGGGATGTCACTTTGGTATCGGGGGAAGGC
CACCACCAGCGTGAGAATTGCTGACAGGTGCAGAACATAAAACATGTTTGGTTTGTTGTTTGTTGTTGTGACGTCAGTA
AACTGTAACCAAGGTAACACGACTGACTCCCTGACTCAGTGAACAGCACGAGAGATAGAAGACCCTGTTATCCCTATTT
TTTTTTTTTTTTTYWTATGTTAGG
>Contig272 4086 reads, 678 bases
AAAAAAAATAGGGATAACAGGGTAATATCATTTTGCAATATGGCGACTCTAGAATCCATGATTGTTGAAGAACAGAGGG
AGCCCGAAAAACCAATTGATAGAGAAAAGACATGCCCTCTACTTCTTCGTGTGTTTTGTTGCAATGAACGCCATCATCC
TCTGATGGAATTTTCAAGAGGAAGCACTCCAACCAATGAACTACAGATATATACCTGGATGGATGCCACCTTGAAAGAA
TTGACAAGTTTAGTGAAAGAAGTCAACCCAGACGCCAGAAGAAAAGGAACATTCTTTGATTTTGCCATTGTATTTCCTG
ATGTCAGATCACCTACCTTCCGCATGCGAGAAATCGGCACAACCTGCGCCGGTAGAAAATCACCAGATGACACAGTGAC
ACTTGCACAAAAAAAGTTTACCATTGGAGACTACCTTGACATTGCTATCTGTCCTCCGAGACCAGGTGGCATGACTCCA
ATGGGACGAGGAAGGCGACAGTTTTAGGACAAGATTTTTTAATGCAAAAACTCTTTAGCAATGTTAATGATCCTTTACA
TGGTTAGGAAATTAATATGTAGGCTTAAGAGGCGCATTTGTTTTGTTAGTTTGTTTTAAAAAATCTCTTTGACATTGTA
AAATATTTCATATCTTATCTTTACATTGCCATTTTGAATAAAATCA
>Contig273 464 reads, 729 bases
GTATTTTCTCCCATTCAATAGCCTTGAGAATATTATTGACTTTTAAATGACATGGTTGGAAACACCAAGTCTTTGGAAG
GGACATAACTCATAAAAACATGAATAATCTGTGGGTTGTCTTGCTAAAGTTGGTTGCTGATCAACAGAACACTTGGGAC
AGAATAATCTTACCACTTGCTGAACACATGCAGGTAACATGTCATGTTGACTTTGTCAGAACCTGCAGGTAACATGTCA
TGTTGACTTTGGATCAATATCTCTTTACTTCCCCTGGCTGTATTCACCAGTCCATTGACATGATCATCATTCACATAGA
GCCAGTGGCCACTAGGGCATGTGTTCACATGCATCTTTAGTACAACTGTGTGTGCAATGTTCAACTCTCTGTGCAATGT
TCAATTTTCTGTGCCATGTACAACAGTGTGTGCAATGTTCAACTGTGTGTGCAATGTTCAACTGTGTGTGCAATGTTCA
ACTGTGTGTGCAATGTTCAACTGTGTGTGCAATGTTCAACTGTGTGTGCAATGTTCAACTGTGTGTGCAATGTTCAACT
GTGTGTGCAATGTTCAACTGTGTGTGCAATGTTCAACTGTCTGTGCAATGTACAACTAACATCTGCTTCATCAATTATC
CTTGTCTTCAATTTGAAATATGACAATTTCAAACAACTATTGTTGTTTTGTTGTTAAAACCATACAGAAGTTTTAATGA
TATAACCTTTGCTTGGAA
>Contig274 7228 reads, 553 bases
TACACTCTTTCCCTACACGACGCTCTTCCGATCTAAAAAAAATAGGGATAACAGGGTAATCTTCTGTCTCCTGACGACT
TCTATCTAGTCCGCGCATTTGTATGTTAGGGAGATAATCAGATCTCACCATGATTCTGGCAAGAGTTGTCGTTATTCTC
TCAATTTTGATTGGTGTGTCCCAGGGTGCTGCTGACCAAAACAGCCTTAAGTTCGGGGCCTGTGTGATTGCCTGTAGCA
ACAGTCTTATCATAGGAACCTTGGGGGACTTGCAGGGATGTCCAGATGGCTATGAATGTAGGTCAAATGGGTGCGGTCT
CACGTGCCAGCACGTGACAACTGCTGTGCCTCCAGCTTCGGTGTAGACAGATATACCGTTAGTGTATGTGTGTGTGTGC
CTCACGATCTGCAGGACCCAGCCGGGAAAGTCTGGCCTTTAATGTAATTATAACTTGCATCTGGCTTGAACAAAAGTTA
AAAGACTTTTATCCCACATAATCACATTTGTAAACATGCAAAAAACATTAAATTATCTGAAGATAAAAAAAAGTTTTTT
>Contig275 5439 reads, 966 bases
GGGTAATCACCTGATCATATTCCACTTGGCGCTAGTTTCTTACTTGAATCCAAAAAGCCTGGTACCTACAGTGAACGAA
TCACCGTTAAAGCTGAACCTGATCCATCATGTGACCCAACTCAACAACCATGTGAACAATGGCTTCCAGGTACCTACAA
CACCACAGTTGCAATTTGCAATGGTGAATGTGGTTCAAAACACCCACACTCAGCCATCTATGACACCAAACGCGGTTCA
TTCGATGTTACTGGCTAAATGATTGTTGATGATGATCAAGTCTTTGTTCATCTTCTAATGAAACTTTCTTTTCCATCTA
TTTCGAAATTTATTTTATCAATAAACTAAAACATCATATTTACTGATTAGTGAAAAAAAAAAAAAAATAGGGATAACAG
GGTAATAATAATACCATCACACAGTCCTGACGAATACACTCGTACTTGAAGCTTTTTAAGATGAGAGCACTTATTTTTC
TGACTATGTTCGCAGCCATCTTCTACGTGGCACACGCCGCGCTGAGTCGAAAGATAGGTTGTTCTGTTGGTCGTAGTGA
GGGTGACGTGTGGTACCTAGATGGATGCAAAAAATGCGATTGTACGGGAAATGTAGAAACGTGTGCATCATGTGGGGCT
ATGGCCTTCAAGGCTCCAGGCTGTGAGATTACATTTAACACCACCCTGAAGTACCCAGACTGTTGTAAGCCTATCTTGA
AATGCCCATGATTTCACAAAGTCGAAATGAAAATAAACTAATTAATAAATTATAAGCCATAGTTAATATAAAATATCTT
GTTAAAATTCAAGTGAAATATCACAAATTAAAAGCCTAGGTCGACATTCATTTATTTATTTCGCTGTAAAAATAATTAG
ATAACACACACAAATTATCTAGGTAGCCATGACCTACATTAAATAAAATATTTTTCTACGGCACTGTTGCAAGAAAGAT
CGGAAGAGCGGTTCGTGT
>Contig276 9471 reads, 422 bases
GTGCAGCCGCTGCAGCAGGAGCAGCGGCAGCAGCAGCTGGTGCAGCACCAGCAGAATTTCCTACATTTGAAATTAAATC
TTTGACGTTCAATCCATCTAAAGCCTTGGCAAAAAGACCTGGCCAATATGGTTCAACTGATACTCCTGCAACTTTAAGT
AAAGTAGCAATCTTGTCACTGGTGATGGCAACTTCATCATCAGCCAGGATGAGTGATGCATAAACACAAGCAAGTTCAC
CGTCGGCGGACATTTTTAGTTATTTCTGTTAAATTTTAATAGATTGCTGTAAAATAATAGTGTATGTCGCCGGATAGGC
CTTAGCTCGTTAGAGAACAGTACACTTTACAACAAGGCAGAAATTAAAAAGATTACCCTGTTATCCCTATTTTTTTTTT
TTTTTTTTCGAGTTGCATGGGTTTAAG
>Contig277 13322 reads, 739 bases
TTTTTTCATCTTTTCCCCGTTTTTAGTATTATTAACTTTTGACATTTATTAGGACACAAATCTGGTCATTTCACATCCA
ACTTAGACAGCAGTAGCAGTACAAAATGCCTTGTCACAAGGCAGACAATAGCAGGCCTGGTCACGATAGCTTACAGCAG
TACATGTTAGTACCAGAACATGCGGCATCCAGTCTTTGTGGACAGAATATCCTGGAGAATGTGGAGAGACACTGTCCAC
CCTCTTGGCTCTCACATGGCTGTTGGGCACGAGGGGCTTGTAGGTGCAAGGAATCCGCTGTCTGAAGTGTCTGCAGCTT
GCAGCAGTATTGACTGGAGCTGTCACAGGAACCCGCGAGTCTCTGTGGGCAGTGGATCATGGACATGACGGACAGACAA
GTTCCACCCTGTTCATAACACGGCAAAGCCTGGACTTGGGGCTCATTCATGCCTGTGTCGTCCAGCGTCCACTTACAAC
AGAAGAAGTTGTCGTTGTCACAAGAGACGTTGACGACATGAAGACACGCCACGGCCGCAGCCATGAAGATACACGAGCC
CCCAACCTTCGTCTCACAGTCAGAGTCCTCGGTGGCAGCTTGGGTTGCTAGTGTTGAGAACGCCGAGAGGAAAAAAGCG
CATGTCAAAATATAAAAAAACATCTTCGATTCTCTGAGTTGATCTAACTTCTAGCACAACAAAACTGGGAAATATTACC
CTGTTATCCCTATTTTTTTTTTTTTTTT
>Contig278 12357 reads, 528 bases
CGGGTCACTATAGGCTAGGGATAACAGGGTAATATTGTAACAACATTTATCGTAATAATACAGCCATGGCGATTCCTGT
TTTGCTCCTTTTCATAATGTTACTGCCTTTCGCACCAAGTCATCCGCTACCTTTGGACGAGGCAGGTGAGATGCTGGTT
AACTACAGACAAGATAGACAGGCTCCTTACACCACTACAATACCACCTACCACCACGGTCAAGGACAACTGTGGAGGGT
GTCCAGCTGGTCAGCGGTGTATTCTGGTCTACCCGTCCTGCACCACCCCGCCTCCCAACTGTAACTTGCTGAAAGCGAC
GGATCCCAACCGAAGCTGTGAGTGGCCCTGTAAACCTTTCAACCAATGCGGCTATCAAGACATATGGGGCTAGACTAAA
TTGCGAGACATTGACTTGAAACGATGCCCATTAAAACTTGAATTTTATTTTCGTTTAAAATAAAAAGTAAAAACATGAA
AAAAAAAAAAAAAAATAGGGATAACAGGGTAATAAGCACGTTACCTTAGATCCA
>Contig279 3277 reads, 957 bases
AAAAAAAAAAAAATAGGGATAACAGGGTAATAGAGTCCAACAATTACGTACCTGTGACAACATCAGAGTTTATTGGTCT
CCTCAGAGAAGTCAGCATTGTTTAAATATTATATTTCAATGTTGGCAAACATTCTAGTCGTTTTGGTGGTGGGCTGTGT
TAGCTCGTTCATACAAGCACAAGAATCATGCCCTAACATAAACGCCAGGTCTATATGGGGTGCAAGAGCACCTAACTCG
GTCAGTTACCTAGCAACAAGTGCCTCGCGTGTCGTTGTCAAGGAGACAGGAAGCACGTGCAGTACAAGGGTCACGTGTC
TCGGTCTGGTCAAATCTACACAGAATAATGATATTCTTATTGCTGGCAAACCTGACATCACGTGCAGCTTTTTGATTGG
CCCAGACGGTCAGGTGTATGAGGGGAGGGGCTGGGACATTCAGTCTGAGTACAGTGGCAGTTACGAATTCTGTGTAATT
GGATCATTTGATGGGAGGATAACTCCCACGACCCTCCAAAGGACTGGCCTAGAGGACATGATCGGGTGTGCTGTAAGCA
GGAACAAGCTGGTTACTTCTTACACGGTCCAGACACCCAGAGATCTGTCCGAGACGTCTTCCAACCCAGGAGACGGCCT
CTATCTCTTCGTTAAGACACTGCCTCACTATCTGACAGTGTACACACCATCGCCCACCTCAGCAACTACCACAAGCACG
TGAGCTATCAAACACCATCTCCCACCTCAGCAACTACCACAAGCACGTGAGCTATCAAACACCATCTCCCACCTCAGCA
ACTACCACAAGCACGTGAGCTATCAAACACCATCTCCCACCTCAGCAACTACCACAAGCACGTGAGCTATCACACACCA
GTCGCAACAACTACAACATGAGCTATCACACACCAACCACCACATGAACTGTTACACGCAAGCTCCCACATGCGGAGCG
TCGTGTAGG
>Contig280 7703 reads, 641 bases
TTAATGAGATACTTGAGCATTTTATTTGGAGCTCTATCTATGGCATCCGTCCATCCTCATGGGATGATGGCGTTTCCTC
CTGTTATCCCTATTTTTTTTTTTTTTTTTTTGAACTTTAAAATAAATAAATATTTTATTTTAAATTATACAACAATAAT
AAGTTTTCTCATTACACTGGAACCTATTCATCTTTGCACATCAGTGTTGACTATAGACATGGTCCAACTTATCACATTA
CATGCCTGGGGGTCAGCGTTCCGTCCGTTAGAAAGGTATGCGGCACAGGAACGTCACCTCGATGCCTCGGAAGAACCAC
CTGGCATTGCATCCATTACAGTAGTCGTTCACACAGATGGCGCCTGGAAAGCGTGGACACACAGCCGCTAGGCAAGGGG
GCACAAAGCACTGTACGGCTCCTGGACACGGGTAGATGGCAAGCCCACCTACTGCCATGCACAGAGCAATGAGAAGGAC
ACAGCACAACTTCGACATGGCGGGACTGGTCAGATTACCATATACTATTTCTTACGGTTAAATTCGTGAATCTGTGTTT
CGTCGGGAAAAGTACTCGGGTGAGATGTTGTGATTACCCTGTTATCCCTATTTTTTTTTTTTTTTTKTTTAATCATTTT
TATTGCATT
>Contig281 10640 reads, 862 bases
AAAAAAAAAAAAAATAGGGATAACAGGGTAATATTCAACTATCGCCTTAGAGACGTGTGCAGAGGTCACACACAGAATG
AAGTCGTTATCAACATTTCTGCTTGGGGCTGTGCTCGTCCACATAGCCAGTTCCCAGACATTAGACAACTGCCCGGCTG
ACCTACCAAGAGACAGGTTCCTTCAAGTCCATGGAGACTATTGCTTCCTGTTTGTTCTCAACCGTCTCCGAACCCACAC
CTTGGCCAAAGCTGACTGTGAGAGCCATGGAGGGACCCTCGCTTTGGTCAAGACCCCAGACATCCAGGCGTATCTGTAT
AAAGAACTTGTCATCACCTACAACCTTCACCTATCTAAGATCTGGATCGGTCTCAACGACATCGACAATGAAAACATCT
ACAAGTGGGAGGACGGCACTCCATTAAACTTCTCCGCCTGGGACAGTGGTGAGGGGCCGAACTCGGGTTCATTCTACCA
CGCGACCCACCACAACCAGAACGACTGCGTGGTGATTGACTTGGAGTATGACTCTAAGTGGGCGGAGTACCCTTGCGAC
CAGTCCACTTCCCTCTTGTTCTTCCCTGACAGGGAGGATCACTACTACGTCTGCCAGTACAAACTGTCATCAAGTGTCG
CCTCTTCAACCACACCAGCGCCGGTGACAACGCAGGCACCCGGAACAGAAAAACCGACAGAAACAACAGCTGCAGCAGC
ATAAACTATTTAAAATTATATACTGTTTGATGGTGTCATCGAAGCAAACTGTTCCTTTATTCGAATGTCGTTGAATGTT
AATGCTATCTTGATAACACAGCTTATCAAGTAAGCGGTAGTCATTTCAAAGTCAGACATTGACAACGCAGGC
>Contig282 8971 reads, 749 bases
AAAAAAAATAGGGATAACAGGGTAATGATAGTTGTCTTTGCCTTGACAGAATTGAGGTAGTAGCCATTAGAAGAATAAG
ACAGGTGCAAAGAAACAACAAGAAGATGTACTGGATAACTTTACTTCTTACACTGGCTGGAGCTGTCACTGTCACTTAT
GCCGCTGTAGGAACCACATGCTCACACAACAGTGAGTGTAGCCAGGGGGAATGTTGCCAGATCTTGAGTGAGTTCATGA
TATTGAGCAAGAAAAGACAACTCGATTGGATGACCACCACACCACCGTACCCAACCAGAGTTACCCAGGGTACCTGTCA
AAAGTACCAGCTGGAGGACAGTCCCTGTTACCCCCTGGACAAGATGAACGGCTTCTGTAGCTGTGAACCCGGGACTCGG
TGCACAGAGCACGAGTACCCTATCACCACGACCACACCGCCGACCACCACAGAAGAGGACATTTTGACCACCACGCCAC
GTCTGGCCAAGCGGACATTCGGTCGACCTGGTTATGTCTGGTACGCCAGGTGTGAGAAAACACCCTCATAAACATAGAC
ACTGGATGAGAGACAAACCAAATTTGAAAAGAAATAAATTATTGCCAACATGAATTGGTGTGCCTGTAGGGACATTCGT
CACCAACTAGATAACACTCAAGCAATGTTCCCTGTTAGGTTCGTTGGTTCGAGAGCAAAAATAATAAATTTCATGTTCG
AAGTGTGAAAAAAAAAAAAAAAAATAGGGATAACAGGG
>Contig283 5247 reads, 824 bases
ATTTTTTTTTTTTTTTTTGACAGTATGGATGGTAATTTTTATTGACCCCCGTGCATCTAATTTGGCTATTGTGACGTAG
TGTTGGACGGATAATCTATTCTCGAGAGAAAACTATTATCACAGATGTAGAGAAAAATGTTAAGCGTTACTTTTTGTTA
TTGTTTATTATGACAGTAAAGAGCGTGACAAGATGTTTGTGACAATGTCACTCCGTTCCTTCCGATGACACCGCCCCAC
ACGATTGATGACTCTTAGTCAGACGCTTCTCTCGAATCTTGTTTTTTGGCAGCGTCACTGTTCCAGACGCCGGCCGGAT
GTTGAAACCGTTGCTAAGGGGGAGTGTTCACATGATCTCCCGACAGTTGGCATGTCGACTTTCAAGTTTGTCCTTGGTG
CGTGTGGTGGTCTATTCCGGGCGTTACAATGTTTGTATAACGTTTGCAACGGCCGTTGTTGGGCGCAATAGTTCTTATC
CGTTTGACGAAGTTCTTTTAACGATGACACGAATTTGAAAAATAAAAAATCTCAAGACACGGGTCGCATGGTGCAGCCC
AGTGCAAGAGAACGAGTCGTTTACCGAATGTCTTATTGCTTAAGAGTACTTACAGTTTTTTAGTTCAGAGATTTCTTTG
GTGGGGTGTTTGTTTTCTTTCTATTCGTTGAATATCTTTGGCGTGTTGAATGTAGCGTTGGAGCAATAGCGTTGGACTG
TCGCCCGGGAGTTTGTAAGAGATGCTTCTTAGGCAAATCGAAGGGCTTGCTGTAAGGACAHGGGCGGACAAGAGTCTTT
AACACACTCTGCAGCGCTCTACGGCCTGAGCGCG
>Contig284 5090 reads, 704 bases
ACACGACGCTCTTACAAGTATAAACGAAAATGAGTGGCTATCCAACTCTTCGCCCACAGTCATCAGCAAGCAAGGTTAT
AGACCTCCCCAAGGGTGCTTATGGGGTACCAGATGCCATGATGAATGGATTGATGGCCGGCAGAGCTAGTGCTGGACTT
CAGACTGTTCATCCTCTGCAAGCTTCAGAGGAACTGTGGAATGATCACCAAATGAAACTGGACTATGTAATGTTGAAGA
ATTCTCAAGGCCTCCATGCACCACTTAAACTCCAGATGGAACGTTTTGCTGTCTCTCATATGCAGAGACTGCCATGCCT
TCACAGCTCCAATATCTTATTGGACACATTGACGGGAGCAGATGACCATATTCGATTTGAGGATATATTGAACAATCCT
GCAGACAGTGAACTAATGGGACAACCACACGCAATGATGGAGAGGAGATTGGGGTTGTTGTAACTATTGGTCATATTGT
AATGCACATAGAATCCTACCATGTGAAATCAATAATCTAACAACTTTTTTTCAATTATGTTGCTTTGTTTGAAAGTTTG
GATGACATAGTATGTTGGCATGCGTAAGACAGTATGAATAAAGCGAGAAGATAGGTTTTTATTAAGAAAAGAATAAAAA
AAATATTTTGTTTTCTGACAGAATGACTTCTCAATTGTGTAAGTTAAGAAAAAGGACATTTTACTATTTGAG
>Contig285 2692 reads, 677 bases
AAAAAAAAAATAGGGTAATAGGGTAACTGCAACATACAAAATGGCGAGCTCCAATGGCAATAGCAAAAGGTCAGAAGAT
GTCTATGGACAAAAGATCGACCGCTGTTTGTACAATGCTCTAATGAAATTCGTTAGTGGTGTTGGTGTTGGAATTGTGT
TTTCTGCATTGCTATTTAAACGGAAGCCCTGGCCTGTTCTTTTGGGTGTTGGCGTAGGCATGGGTATGGGCATTTCAGA
CTGCAACCATGAGTTCAAAGGCCCAATTAAAGTGAGGACAACAGGGGTATCATCAGAATCAACAGCAGAAGCATCATGA
TGAAAAGTGAGAAGAAAGAAAAAAAAAACCTTTGCGTTGCCATCAAACTGAAGGAAATAACCAAAAAATGTGTTATGAT
TGAGAATGTCTTGAAATAAAATATTCTATTAACATTGTCTCTAAACTGTATGCAATTTACTGAAGTTGAAGAATAGCTA
CATAGATATAAATAACCGCTTAGTCTCAGAAGTAGTATATTGTTGTTTTTTTAACTCAGAGAGACAACACTGCTATATA
TATCATATGAATTTTTTTTTYTTCTTCTATTTAGAGATAGTAAAACACATTTTAATAGCAGTGATGTTTTTATTTATGT
TTTTCTGTGGTAACCCATGTGTCATTTAGAAATATCTGATTTGTC
>Contig286 7889 reads, 819 bases
AAAAAAAAAAAAAAATAGGGATAACAGGGTAATACATCCATACTTAGTCTCCGGTAGAGTCACCGCCCTTTGCTCAACT
TGAAATTAAATTAGCCCCAGACGACGTCAACTGCTGTTCACCATGAACTGTTACCAACTTGCAGCTTTGGTCCTGTGTG
CCGCTATCGCCTGCAGCTCAGCAGACTACCAACCGTCTCCTAGCTCGCCGGGTGCCGAGGCGCAGCCCGGTTATCTTGG
AGTCAGACGTACTCCTTATTCGTGTGTTGACATCTTCAGCCCGAGGGCCTGTCAGGGCGTTGCCGATGGAGACTACCCC
ATGTGTGCCCTCTGCGAGTACGGCTACTACGCCACCTGCTCTAACGGAATACTGTACATCAGACCATGCGCAGAGTCGT
ACTACTACGGCAACCAGTTGGTAGCCAGGATGGTGTTTGACGCCTACACCAGGGACTGCCAGAGATACGCCTCAAACTG
TCCTAGGTATTAAGTCTTTGGACCCGGCGTTGTGCAAGAGGAGGGAGACGGAGAAATGTCACCGTTACCCACTCCTATC
AATCAAATATCACCAAAACTTGTTATACATATATATATTAATATCATACATCTGTTGATTCACTTATATAATGAGAATT
TTCGTGGTTAGGGTTAAATTTAAAAATAATTTTATGCATGAAATGTAAAAAAAAAATTGTTTCTAGATGTAGGAACTCA
TGTCGGAACGTGTAAAGGGACGGGAAAAAATTTAGTGCGGGCTTAATATTCTTTTTCACAATGATTTTAGATACGGAAG
AGCGTCGTGTAGGGAAAGAGTGTAGATCT
>Contig287 5273 reads, 682 bases
ATTTTTTTTTTTTTTTTTTTTTACTGGTGATACAATTATTTATTGAATTTTAGTAATGTGGCCAGATTTGTATCTCTGC
ATACAGCTTGTCTCCTGGACATAACGTTGTCTTCATATCCCTGTGACCCCTCAGTGTGTAATTAGATGAGATCTTCCCA
AGTGACACGCCACATTCTATCATGGCTTTGGCCGCTTCCATTTGGACATTAGGGGGCAAGTGCTCCATGAAATTTCCAG
CCAAACAGAAACCTAAGCCAACGTCATTATAACCGAGGGTGTGGGCGCCAAGCTTGTCCCAGCCACGCCCCTCGTAGAC
CGAGCCGTCCCCGCCAATCACAAAGCTGTAGCCGATGTCATCCCAACCTCGGGTATCCATGTGCATGTCCTGGTAGAGT
TTGACCTCAATAATACAGGACGCCCTGTCGAAGCACTCATGTTCCGCTGAATGGTGAATGAAGGCGTACTCAACTGGCT
GTTTAGATAAATAGGTCACACTTTTGGGTGCCCTGGCTCCCCATTCTGTACGGGTGACGATTGGAGGACACGCCCCAGA
GATCTGATGTGGCTGTAGTTCAATGATTAATATACCGACATACAGTGAGAATATAGATACAAACATTTTAATACGTCTT
CTTGTGTCTACAGATTAGACATGTATATTACCCTGTTATCCCTRTTWTYY
>Contig288 1554 reads, 524 bases
CGCTCTTGGGTAATCTTTTTGAAGAGCTATTAATCATGGCGACCCAACTATCTAAGAAGCGAAAGTTTGTTACAGATGG
TATTTTCAAGGCTGAGCTTAATGAGTTCCTTACAAGAGAGCTTGCAGAAGATGGCTACAGTGGGGTTGAAGTTCGTGTA
ACACCAACTCGCACAGAAATTATTATCCTTGCAACTCGCACACAGAATGTTCTGGGAGAGAAAGGTCGCAGAATCCGTG
AGCTGACATCTGTTGTTCAGAAACGATTTGGTTTTCCAGAGGGAACTGTTGAGCTGTATGCTGAGAAAGTTGCCACAAG
AGGTCTCTGTGCAATTGCTCAGTGTGAATCATTGAGATACAAGTTGATTGGTGGTCTGGCTGTCGTTTAATGATTCATA
CGACGAAACCCAAGAATTGCCTTGTAATCGTTTGTGTGAGGATATGGGATTTTACAATGGAGACTGCATTCATAACCCG
TCGTTATGCACTGACCACCGCGAAATTGACGTCTSAYGCAAGGTTCATAA
>Contig289 5386 reads, 960 bases
TTTTTTTTAAATGTTTCTCTGTTTAATAGTTACGCCTGAACAAATGATGATTTAGTTTCGTACAATTATAATTTACATA
ATACAAATATGCATCAACCAAAATAACATTTTAAAATCGTTAATAACAAACTTTAACTTGAAGAATAAGATCAATAAAT
GTGACTTTATGTCATCTGTTGACTGAATAACATGACATACAAATCAATGTACAAGTTAAATCATCACTGCTTGCTTGCC
ACATATTTCTTAATTCCGTCAATCTCTCCGACAGTCCCCACAAGTTTTTGTACCAGAGGGAAATCCTTAATGCTGTCCT
CCACGGTGACCTTGAGAAATCCCGTGCTGATGTCATAGATGACAAGGTCAGCCAGTGTCACTTTGTCACCAACCACAAA
ACCAGTTCCGTTGTCTTTCAGCATTTTCTCAAAGTATCCGAGGAATCTTGGACCGGCCTCTTTCTTGACCTCTTGCAGA
ATTTCCTCCTTCTTAACCGGGTCTTGCTCACGGAAACTCTTGGCAAACGCTTGAATTAAGTCTTCTGCCAGGTTTACAA
CAATGTCAATCTTCAGTGCTTCCAGGTTGTTCTTGCCGTAAAAGTTAAATTCCTTTGCGAAATAGGAAGACAAAGCGGC
AGTCTGAGCGTACGTCACACCATCAATCTCAACGGCAGGAAGTTGGCCAAACGGAGTGTTAGGTTTAAATTCTGGCCAC
TTGTCTCTCGCAATTCGGACATCTTCGAACTCTCTCCCAGCGGCACGCAGAATGAGTCTGAGAATTTCGGCACGACCTG
TCAGGTCAAAATAGATGACCTTGATACTTTTAGCATCTGACATTTTCTATTTGGAGTACTGGCTGCTGGTCTCTGTTCA
ACCTCAGACGATTCTGTGACGCGAACTTTGGAGGTCGGCTGCTGCAACGGTTGTCATTACCCTGTTATCCCTATTTTTT
TTTTTTTTTTTT
>Contig290 8923 reads, 628 bases
AAAATAAATCAAAAAAAAAAAAAAAAAAAAAAATAGGGATAACAGGGTAATATTCCACGCTTGTCTTCGAGAGTTTTAG
ATTTACAGCTACACTTTACGTCTCAACCGGGATCCCCCACAATGCAGTTCTCTACCTTTGTTGTTCTTGCCATCGCTGT
TGTCTACAGTATCAACGCAATCACCTGCCCCACCTGCACTGACCCCAACGACCACCTGACGTGTACAGGAACACAGGAA
TGTCACCAGGACAACGATGTTTGCGAGACAAGAATCGATAACCATAACAACCATAGAATCGAATACCACTGCGCACATT
CCCAGAACTGTGCTGACCAGGAGAACAGAAACAGCTGCGACAACCCCTCGGCCAATGGCGGTGGTCACTGCGTCATCTG
TTGTAACAGCATCGCTGACTGTAGGATGAAACGCAACGCCTATTACGCCACCGTGACAGTTGGTTAGATGACATATAGA
CAGAAATATGATGTCCAGTGAACTTGAGTGTACCATGGACGCCCTGTTGTGTTATATCAGCTATTTACTGTAACAATTC
TTTTATTTACCATCGACTAAACTTGAAATAAATTTGTTATCAGAAAAAAAAAAAAAAAAAAATAGGGATAACAGG
>Contig291 2700 reads, 184 bases
TAAAAAAAAAAAAAAAAAAAATAGGGATAACAGGGTAATACTCTTCACCGATACTTCAACATTTGACCAAGCTCTCCTA
GCTACTATCAGCAAAATGGCCGCCCTTCAACTCATCGTCTGCTTCGCCATCTTCGCCATGGCCGCAGCTAGCTACAATA
ATAATGGCTACAATAGTGGCTAAAAA
>Contig292 8957 reads, 1037 bases
CACATGTTTAAAATAAAAGGATACCAACTTATTHCCCTGTTATCCCTATTTTTTTTTTTTTTTTTGCTTGAATGTTTTT
TATTAACATTTAATAACACTCATAACGTTAAATTGAGTAATGAAATCAACACACACAAAGTGTCCTTGACATTCACCAG
GGCGTATCTTTCCTGGTGGCCAGGTATTGAGCAATATTCTCATTGGACTTGACCAGTTCAATGTTCTTCTTGATGAGAG
GGTAGTTGCTGACGTCCACAAGGCTGGACAACATACCTCCTGTGGTGATGTCCAGCAACAGGATGTCAGCCAAGCTGAG
CTTGTCCCCAACCAGGTAGCCGGAGCCGTTCTTCTCCAGAATGGCCTCCAGGAAGCCGAGGGTGCGGGGCGCCAGTTCG
TCCTTGACCTTCTTCAGCCCCGCCTCCTTGGCCGCAGGGTCGTCTGTGTGGAACAGGGCGTCCACTGCAGGGTTGACAA
AGTCGTTGACGAGGTTGACAATCTCGTCGATTTTAAAGATCTCCAAACTGGAGCTGCCGTAGAAGCCAAACTCTCGTGC
CAAGAATGAGAATATGGCGAGACTCTGGGCGTAAACCACGTCATCAACCTGCAGGGCCGGAACTTGACCGTACGGGGTC
TGGGGTTTGTACTTGGGCCAGTCCTCTTCGGAGAAGCGCAGGTCTTCGTATTCCTTGCCAGCAGCTGCTAGGAGAATCC
TGGCCACTTCTGCTCGACCACGGCCGTCAAAATAGAAGAGCTTCAGTTTGGCGTCCGCCATGCTTTTGGGATATTTCAC
CAACTGGTCACATGTCATCTCTAGAGTCGAAGTCGTTGTCCCGTGTGTGTCAGAGCATTGCATGCCATAGTGTAAATTC
CAGGTCAGTGCAAAAAATAAAAAACAGGCTGTGCGAGAGATTCCCATTTATGTCAAGGCAGACTGTACAGCATTGATAT
TGATGTACGGGCACGCAACGTTCTACCTCCTGGCTCCTGGAACAGCAGACGATAACTGAGTTACCCTGTTATCCTTAGC
CTAATTACCC
>Contig293 6218 reads, 519 bases
AAAAAAAAAAAAAATAGGGATAACAGGGTAATAACCATTCCGTAAAAAGAGCTGTTGGCTGTAGTATTGGCAACTTGTA
AAACAAAGGGAGAAATTACATAAAATGAGGCCTGTTCTAATCGTCTCCTTGTTGATGTGCTATGTTAGCGCTGTCTATT
GTGCTTGCGTTTATAATAATAACATTATGATACAGGAGGGCCACACCTACAAGCCGTCACCTTGTGAGTTCTGTACGTG
CACAAGTTCAGGTCAGCTGAGGTGTGCCATCCAGGACTGTGCCTTCCCGCCTTGTCAGGAGTACCACACGCCTGCCGGC
CAGTGCTGTCCTGTTTGTACTGGTGGGGTTGGAGTCCTAGCGTAATGACGTCATAAAAATGGCTGTGTCAATGAAGTTA
TTGGATAAACAAAATTTCCATGATCTTATAATGTAAAGAAGAATAAATTATGTCTAAAAATTGATGTTAATAAAATTTA
ATGAATCGCAAAAAAAAAAAAAAAAAATAGGGATAACAGGGTAAT
>Contig294 8071 reads, 604 bases
TTTTTTTTTTTTTTTTTTCTGGTTAAAGTGACTTTTATTTTAGAAGTGCCGTAAAACAGAGTGCAGATTGAACAATTAA
AATGGAGATAATAACATCACACAAGCTATAGGATTTGTGCTTTGGTTACATGCTGCTATACTGGGTCAACCATCAAGCG
TTGTCTGTTTTTAAAATAGTCATCTTATTAGCCCCTTCTTCTTCCAGTGCAATTGGTTTCATCACTATTGTCTCCACAG
TCATTTCTCGTGTTACAAACCAAAAGTTGTAGTACACACCTTGTGTTATTACATCCGAATAGGAGGGGGTGATTACAAT
TGAAGCCGCAATCGGCTTCATCAGAACCGTCATAGCATTCCGCTGTCCCGTCACACCTAAAAAAATTTGAGGTACATCC
GTTGCTGTCCAGACATCTGAACATGTTGGGTTGTTGGCAGAATCTGTCATAATTATCTGGTGTCTGCCTTCGTCTCGGA
TTGGAGTACACAACTGCTACCACTAACATCACGAGAAGACACAATTTTGTCGACATCGTTCAGCTCCTACTGCAACAGG
CTGTCAAAATGAGATTACCCAGCTTATCCCHTTTGTATTACCCTGTTATCC
>Contig295 350 reads, 158 bases
GGGATAACAAAAAAAAAAAAAAAAAAAATAGGGATAACAGGGTAATAAACCATTGTGAACTAAACTTTCTAAAGGACCA
TCCAACACTCTCTACCAATCTCCCGCCAGTCCGCAAAAATGAACTTTTCCATCAAAGTAGTTCTTGTGGTGGCAGCTGT
>Contig296 5298 reads, 1159 bases
CTTATTACCCTGTTATCCCTATTTTTTTTTTTTTTTTTCGGTACAATTCTTTTATTCTCCAAACGCATCTTGAGTAATG
TCCTGATTTCCAGATCCTATTGTCCGAGCTTATTACCGTGTCGTTCTTGCATCTCGCGTTAGATGTCAATGACTACGAC
ACATGTCCAGTTAACTGGCTTATTTCTTGTCGGTTGTGCCAACATAGGCCTGGCGGTACGCTCCAGTAGAATACTCGTT
AAATCGTGAGCGGTCCCCAAACATGTAATGTTGGCTCATATCCGTGGAGTAGCGAGATGCAGGTGGGGTACGTTGGTAA
ACCTCGGCCACTTCTCGAAAGTAATGAGAAGCATTGCCGCAACAAAGCCCCATGTACTGGACACCAATGTCTCTACAAG
TCTCAGCAAACTTTCTGATCTCCGTGCGTCCACACAGTTGAGACGGCAGGTCTGTGGGAAAGGCGGGCTGACCTGAGAA
TGAATCCACAAGAGACATGAAGGTAGGTTGGTCGTTGGTCGTCCTGTAAGGCACTGGTAGACAAGCAATTGGCCCCCTG
CACGCGGCTCTAACTTCACGAATGAGCGGGAGCATGGTTGCCGGGCCTCGGCTGCAGTTCAAGCCAACCACAGCAGCAC
CCGCGTCTTCAAGTCTGCGACAGGCCTCTCCGAAAGGGACGTCTTCAAACGTTCCAGCCTTTCCAGTGGATGACAGAGT
GACCACAGCAGGTGTTCCTTTGCCGTACTTTTGTATACATTTCAATGCCAGCATGGCCTCTGCCAGTTCAGTAAACGTT
TCTGCCACAATGAAGTCCACGCCAGCTTCTACGGCCCACTCAATCTGCTCCTTGAAAATTGCTTCCACTTGAGCATGTG
TAGCTTCATTGTCTTTCTGGTAGAGCGTTGTATTACAGATGTTTCCTGCAAATAGCGTTCCAGTTGCCTTGGCAACCCC
TTTGGCTATGTCTAAGGCTAACCGATTCATTTTCTCCAGGTCTCCCTCTCTGCCAATGACTCGGAGTTTCTCCCGATGT
CCATAATACGTAAAAGCCAGAACAACGTCACTTCCCGCGTGGACGAATTCTTCGTGAAGAGACTTCACCAATTCTGGAT
GTTCCAACACTACTTCCGGTACAAAGGCGCCTGCTTTTAGGTACCCCCGCCTC
>Contig297 9418 reads, 742 bases
CCCTGTTATCCCTATTTTTTTTTTTTTTTTTACATTTTTAACAGTATTTTAATGGGTCACATTCAAACATTTTATAAAT
AATTAAAATTTCACAATGAATCGATGAAATGGAGATGAAAACAAGATTTGAAGATTTTTCTTCCAAGTCTAGAAGATAG
CTGGGACAGCGCTGTTGTCTCCAGTACAGTCGGTGCTCGCCCAGCCAGCTCCGCAATCAACCTCGGGTCTCTTGGACAA
TTTCAGGCCGTTTCTGCAGAACTCGTACTTCTTCCTGCACTTTGAGCAAACGACCACCGATGTCTTCCCGTTATTCAGA
CAAAATTTGGCGTTTGGATCTGATTCGAAACATTCGAAGGCCTCGCCTGGCTTAGGGCACCAGTAGTTGTCGGCCATGA
CGGCACAAACAACAAAAGCCAGAATGATAAGTTCCTTCCTCATCTTTACTGAATGTTCGTTTCCTCGTAGATTTCCAAG
AAGTTGGGACGTTTTTATTACCCTGTTATCCCTATTTTTTTTTTTTTTTTTTGACGCATACTAATCTTTAATGTTAACA
TTATAATATCCGCTATGACGTCCTCCAACTACGGAGTCACGCCTCATGGCATGAGAAGGTAATCGCGGATGGCGTTGAC
CTCCTTCCACACAGGACTTCCCTCCCCGTGGATAGGATGGATTGGATAGCGCAGTCTGACCTCGCCCACCCCTATTACC
CTGTTATCCCTATTTTTTTTTTTTTTTTTCC
>Contig298 10037 reads, 475 bases
TGAGAACTGCAGCAGCGAGGCGCTTCTGACTCDTACGACTCACTATAGGCTAGGGATAACAAAAAAAAAAAAAAAATAG
GGATAACAGGGTAATCTTTTCTTTTGCTACTTCCGGTCCGTCAAAATGACCAAAGGTACGTCCAGTTTTGGTAAGCGGC
ACAACAAAACCCACACCTTTTGCCGCAGGTGTGGGCACAGGGCTTTCCACATTCAGAAAAAGACATGCTCTAGGTGTGC
ATATCCAAGTCCACGTCTAAGGCATTACAATTGGTCTAAGAAGGCTCAGAGGAGGAAGACAACTGGTACTGGAAGAATG
AGACATCTTAAAGTTGTTTTCAGGAGATTTAGGAATGGTTTCCGAGAGGGTACAGTCCCCAAGCCCCGTAATAAGGTTG
CTGTACCAGCTTCCTCTGCTGTTGCCACTAAATAAATTAAATAAATTCGTTGCCCACATAAAAAAAAAAAAAAAAAAAA
A
>Contig299 4508 reads, 524 bases
AAAAAAAAAAAAATAGGGATAACAGGGTAATATTCAATGAAAGAAAACCTTCAACAAAATCTAATCACACAATAACTCA
ACTTTTAGAAAATGAATTTCAAGTCCACAGCACTAGTTCTTCTGGCTTGTGTGCCACTCATCTTAGCGGCTGGTATCCC
GGGAGGTCAAGTCGACTACCAGACAACTCTGACAGACTCCAATGTCATTTTCGCCGTCAATGCCATCAACGAATATTAC
CAAAAGCAGGGAGACAACCAACTCAGGACAGCGATCAAACTTATTAGTGCTACCTCACAGGTTGTATCTGGGGCACTGT
TTAGATATACCATCGAAGTTCAAGTAGGAGATAAAAGTGAAGTATGCACTGTTGCAGTATGGAGCCGACCATGGTTGAC
TGGTAATGAAGCAACTCAGCTGAGCGGAACACCTTCATGTGGAACCCTTGCGTTATAATTCAAACCACTTGAATAGTAG
ATAGATGACCGGTCATCGGAAGAGCGTCGTGTAGGGAAAGAGTGTAGATC
>Contig300 2794 reads, 571 bases
TGTTATMYYTWTTTTTTTTTTTTTTTTGATGATGCTGATCAATTTAATTTTTTTGACCATTTCTTTGTAATAGCAATGT
TAAGAAGTCAATATTAGTTACAATTCGATGTCATAGGTTACATTTGTATATCATTATCATGGGCTGCAAGTGGCCATGC
ATTGCTCCTCAGTTTCGAATCTGTTCTCATTGCCTGTACACCCTCCATAGTAAAACTTGTCACACCTTTGGGTGCTTGT
GTTGTAGAAGTATCTCTTTATCTTGGCCCGGCAGTGCCCTGTCTCTGGCTTCAGTCTGCAGTAGCTCGGTGTTAGTGTA
TTGGCGTGCAGACACAGCACGGCTGTTAGTGTTAGGATGAGCACAAACAGTGCAGTCTTCATGCTGATAAGAGTGTTTC
TAAAGCTGCGTGCTATCTCCTGGTGAACTAAAGCTGCGTGCTATCTCCTGGTGAAGAAAATATTTCTTATCTCTTGTGA
GGATTTTAAAACGTGTGTCCAGCTAAGTTGTGGCAGATATAAGGGATCCCATGTATTTACTTACATTTTTCTAGTAGGT
CTGACATGTTTATTACCC
>Contig301 13572 reads, 845 bases
AAAAAAAAAAAAAAAATAGGGATAACAGGGTAATAATGAAAACAGACAATATCTACCGTGAGCACGTCACTGTATACAC
ACAGGTATCATCCTATTAGCTGGCTGGTCCGTGCCCAACGCTCACATATTTCAGATCATGAGTTTTATGAGAGCAAGTT
TTCCGTCGCTGACTGTCGCAGCTGTTGCAGCATTGTTGACACTTATGTCTGCTGCTCCTGGCCCGAGCCTCGAGTCGAG
GTCCTTCCACCGCCGGGACCTGGTCACTTTGTGTAAGTCCATGGAGGAGTACACTGACCGGATGTGCCTGGACTACCTC
AACTACGGCTGTTTCTGTGGTCTTGGGGGGACAGGGACCACACCCAAGGACGATGTGGATAAGTGTTGCTACAACCATG
ACCACTGCTACGACAATGTGGATGGCTGCAAGGTGGCGGTTCACGTCGTCCTCAATAAAATAGAATGTTCTGGAGGAAA
GTGCACATGCACGGACACGGACAAGGGTGCTTGCCCCTACAAGCTGTGTCAGTGTGACGTCGACTTCGCCGAGTGCCTG
CATGGAGCGACCTTCAATAAATCAATGACCCATTACAACAAGAAGAACTGCAACTAGCAGGTAGCCCTGTAGCCATGGT
CAGCGTCTTACAGGTAGCCCTGTAGACATGGTCAGCGTCTTACAGGTAGCCCTGTAGACAGTGTCAATGTCAGTGCATT
TCTTGAAATATTTAGTTTCTTTTGAAAAACATTTTTAAAAGCTGAAGAAAAAATAATAATTGATAAATTTCTACGGGAA
AACGGATGAAAAAGAATAATAAATTACCGCAAGCCACACTGAGGARAATTAAAAA
>Contig302 6025 reads, 746 bases
TTTCGTTCCAGGTAAATCATGCAAAATCCCTGTATAGAGATCCTGAAGTTCTTGAATTTTCTCTTGATTTGACTTTTCT
CTAAACATTTTTTCTCTTTTTTTTTTGATATTGATTGTTTCAGGCATGTCGACAAGGACAACAACGTAACGGAACAGAC
ACACTGAATCAACATGTTCTACCTCTTTGTTAAGGATTGCTCTAATGAGGTGTGAAAGATATCTATTGCTCATGAACAC
ATAGTGGGCCATATGTTTATCAAATGATGTAACAAATCTTGTTTCCTCTGTGTTAGAGATATTTTCATCAAGTTCATTG
TCCGTGCCTGCCACGCCCTGTACTTGCGCTGAATCAACGGTTTTTGAATTCTCACCCAATGATTCATCAGGGCGTGTTA
CCTCTGTGGTAAGGATTGTCTCATCATGGTTTAAAAAGCAGCCACCCGTAATGTAGTTGTTTGCTGACACAGCGGCATG
GCGTGTTACCTCTGTGTTAAAGATATTTTCATGAAGTACAAACAGCTGGTGACTGTACCGCCGATCTTGCGCTGAATCA
GCGGCAAGTGATTCAAAAGGGCTTGTTACCGGCTCGTCCATTTGACAAAAACCTTTGGTAGAGTTGTTACAAAGGCTTT
TTCTGCTTCGTAATTTCTAGGTTAGGCAAAAAGTAATATCGGGAAATACCTATTACCCTGTTATCCCTATTTTTTTTAT
TTTTTTTTTTTTTTTTTTTTAATTTTTTTTTTTTA
>Contig303 4357 reads, 925 bases
AAAAAAAAAAAAAAAAAAAAAAAAAAAAAAAAAAAATAGGGATAACTGKGAACCTACAAGCCTCACAACGCACCAATAA
CACCAAAACGTTGGAGTGTCCGTCCTGTCGCTGAGTCCCATTTGCCGAGTTCGAAAACCGATTACAAACCGCTGATTTT
CCTCTGGATATTGGGCTGCAGTCAGGACTGCACTGATAGGTGTCTTTTAAACTGTTATTTATTTACGTCCATCGGGTAA
GCACTGTAACAACCAGGAAGATCAAGCTTGGCCGGGAAGCTCACACCATCACACGCCTTGGACCTTTATAGACAGGTTT
CTAACATCTCTGTAGAAGTGCAAGCATGACTGAGACGGATACGTATGACGCCCAGTCAGAGGGAAACAAAAAAATTAGG
AAAAAGAGAAGTCGCTCTAGCAGTCCTAGACGTGGGTCGACGATCTCATACGAACCTGTGGAGGGAGGAGTGAGGATAG
ACGTTTACGTGGCCGTCACTCTGTTCGCCATGGCCATCGTCTTCATTAAACTACTTCCCAAGTACTGAATCCCAAGGCA
CGTCTCAAGTACTTCCCAAGCATTGAACCCCAAGGCAAGTCTGAAGTACTTCACAAGTACTGAATACCAAGGCACGTCT
GAAGTACTTCACAAGTACTGAATACCAAGGCACGTCTGAAGTACTTCTAGTCGCAAACACCGTGCAATGCATCCAGACT
AAAGCACGAAGTCCATCCGGTTAGACACTGGGCCCTATGCAGCGAGATGCAAGTGCAAAATTAGACACCTATGCGCTAA
GTACCACACGAGATATAAATGAACCCTAGCATCGTGTGAGCAGCTTGTTACTGAACCCCACTCACTTGGTAACTTTGAA
AGTCTCTTCATTGTGCAATAGAAATTAGAAATAAATAAGCGTAGAGAGMAAAAAAA
>Contig304 6245 reads, 521 bases
AAAAAAAAAAAAAAAAAATAGGGATAACAGGGTAATATTCGACAATTTTGTTTAGCTGCTGTGTTGTAGCCGGCTGGTG
TTGGATTAATATAATAATCATGGCTACCATTACCTGGCTGAGCCTCGTCATGGCTCTTGCATGCGTGACCATCTTGACT
GTACCAGAAGCTGAAGGTTTCTTCATTTCCGACTGTTATGAAACCTGGAGTCGTTGTTCAACGTGGAGCAACTGGCTGA
CGGGGATACTGTGGAAATCTTGTGATGACCGCTGCAAGAGAGACCTCAAGAAAAGGGGAGGTAGATGCGTGCTGGCCAA
ATCCAAATGCTCAACGTCCGGCAAGTCCTACCAGTGCCAGTGTTACTGACAAGCCAATTACTTTATTACGTCATATTTT
CTTTTTGAAATTTATGAGAAATAAATTTCACTATTTTGAAAAAAAAAAAAAAAAAATAGGGATAACAGGGTCGCGCGTT
CAAGTCAAAGAACTTTGTATAAATCTTGTTGTAAGTCAGTAAAACGA
>Contig305 9209 reads, 990 bases
CTCTTCCGATCTSGGGTAACCTACATCCGGGAAATTGAAGTTACAGCTGGCATTTATCTCCAAGTGCAGTTCGCCAGAC
TCATAATTATAAAAGATATTTACACGTTTTTGAGAATGTCTCTAAAATTGTCTCTTGTCGCTCTCGTCAGCTATTTGGT
AGTGATTCAATGTGTTCGTGGAGCAGCCGTCTTTCCGATATGCGAGATTGCCTGTTTGGATGTCTACCAGCCCGTGTGC
GGCTCTGACGGGAGGACCTACGGCAACTCCTGTGATGTGACCGTCGCAAACTGCGGCAGGCCGGCCTCGAGCCAAGTCA
CTGTGGTCAGCCAGGGTACATGCGGCAGTGAAGTGTTAAGCTCATTTTGATTTTGGATTGACCCGTCAGCTGAACAACA
AACAAAGCATACATGGTTCTTAATAAAAACTGTAAAAATCACAAAAAAAAAAAAAAAAAAATAGGGATAACAGGGTAAT
CTTTTACCTTGTGTTTCCAAAGAAGTAGGAACAATGGCCTCTGCTGATGTTGCCTGGTTGATTATTAGGAATAACTCCT
CAACTTTATTGAAGAGGAGTAAGCAGAATATGAGTCTGGAGCCAAATAACTTGAAAAGCAGGAATTCTTTCCGTTACAA
TGGCCTGATTCACGCTAAGACTGTTGGAGTTGAACCAACAAAAGATGGAAAGGGTGTTGTGTTGGTAACCAGAAAAGGA
AAAGGTTTACGCAAGCCAAATAAATCCCTGACAAGAATTGAGCTGAAGAGAGGTCCAAGAAAAACCATTGCTGTCATTC
GCAACTCACTTAAGGCTAATAACTACCGTAGGGACTTGGTTAACTCTGCTGTTAGGAGGACATGTGCTATTCTTAAAAG
CCAGAAACCTGTTGTAATTAAAAGCAGGACTCGCACTGCAAAGAAAGAATAAACTTATTTTGTTCAAAATTAAAATATT
TGAAAACTAAAAAAAAAAAAAAAAAAAATAGGGATAACAGGG
>Contig306 6815 reads, 689 bases
CTTTAATGTTCAGCGGTAACATAGTGACGATCACGATTATCTTGAAGCCCTCAGTGACCCAAATTTGCTTCAGTACATA
TAGAAACATTTCCCCTCGTTCGTGTAGATCTTTTTACGGCAGCTTGGGACCCGATCAGTTTTAAAGACACAAAAGAAAA
TGTCAGTCTTGTACGTCCTACTGGTGTGTCTACCTGCCCTGACCATTGGCCAGCAGGTGAATCTCAAACCTTACAACTT
GACCGCCACCGCGATGTTCCTTGATGTGGACAAAAACGTGGACGGGCAGATCACAAAACAAGAGATCGATGATTCCTTT
AGGATCTACGACACCAACCACAACAATCGCGTGAGCAGACAGGAGTACACCAACCACGTGGACAGCACCACGCCGGGAC
TGCACGCCCTCTCTAATGCCCTCTACGACATCTACGACGTGGACAGCGATGACCAGCTTGACCAGCACGACTTTGAGAA
CCTCATGGCCTTGATGGACGGGGACGCGAGTGGCACTGTCAGCCATTTTGAGTTTGTCAGGTACTGGACCATCTTATTC
ACTGATCTCGAACATCTCCACACAAAGAAACGAGAAGAAAATGAGAAATGAACATAACATCAGTAGCAAACATACAATA
AAAATAAATACTGTACATAAAAAAAAAAAAAAAAAATAGGGATAACAGGGTAATAAG
>Contig307 965 reads, 239 bases
AAAAAAAAAAATAGGGATGAGCCAACAACAAGCCCTGAGCCAACAACAACAACAACAACAACCCCTGAGCCAACAACAA
GCCCTGAGCCAACAACAAGCCCTGAGCCAACAACAACAACAACAACAACAACAACACCCCTGAGCCAACAACAACAACA
ACAACAACAACAACAACAACTACAACAACAACAACAACAACAACAACAACAACAAAGTTTCGAAACCTGTTGGAGGAGG
AG
>Contig308 3653 reads, 316 bases
AAAAAAAATAGGGATAACAGGGTAAGTAGTACCTTTGACATCAAGTCTCGGCGACATCAAATCATCAACATGAAGTCCA
TCGCTGTTGTAGCCTTCACTCTCTTTGCCTGCGTGGTAGCCCAACCAGGAGGTGGCAGTGCAAATTTGGACAGAATATT
CAACCAATATGCTGGCAATGACAACACTTTGTCACAAGCTGAGCTGAACAGATTCTGGCTTCACTTTGATGATAGCGGT
GACGGCCAGGTGAGCAAACAAGAGTTTGACAGCAGCTGGAGACAAGAGAACCTCCCCAACCCAGAAAACGYCGTGTAGG
>Contig309 12172 reads, 593 bases
GGAACTTCACATCCTCAAAGTCTCTTGAAAACACGGCCAGCAACTGATATCCGTCAAATCGAAGTTGCTGCTCGGCCAA
CACGCCAAATGCTATGCTGAGCAGCAAGAACAGAGGGGACACAACTCGAGCCATGCTAGGAAGATGAACCCAGAATATT
ACCCTGTTATCCCTATTTTTTTTTTTTTTTTTTTTTGAGTTCATTGATTTATTCACAGTTTAAAACATAACCATCTGGC
CCTTTCGCTTCTTGTCACCTCCCAACTCAAAGTGTTTGCAACGCTTGATGGGTAATTGTTTCCTGTATTTGCACTCTGT
GCATTCCATACGCAACACAATCTTCCTTGTTGTCTTAGCCTTCTTTCTAAACACGGGCTTAGACTGACCACCATAACCA
CTTTGTTTTCTGTCGTAACGCCTTTTACCTTGTGCGTACAAAGAGGCTTTGCCGGCCTTATATTGTGTCACTTTATGAA
CAGTATGCTTTTTGCACTTCTTGCCCTTGCAAAAGGTGCGTCTCTGTTTTGGGACGTTAACCATTTTGAAGTTTACATA
GGAAAAGATTACCCTGTTATCCCTATTTTTTTTTTTTTTT
>Contig310 10194 reads, 766 bases
AAAAAAAAAAAAATAGGGATAACAGGGTAACTTATCTGCAGTCCTACTCTCCGAACATGAAGGTTGACATAGTGGTCCT
CTTGGTCAGTCTTCAAGTCAGTCTGGTCTTTGGGGCGTGTCCTCGTGTCGTTAGCAGGGCTGAATGGGGAGCCCGGGCG
GCGACCAGCATCAGCCACCTGGCAAACCCCGTGCAGTACGCCTTGATTCACCACACGGCAGGGGCGGACTGTCACGACA
GGGCCACGTGTGTCGCACAGGTCAAGCTGACCCAGAACTATCATATGGACGGCCGAGACTACTCTGATATTGGTTACAG
CTTCATGATAGGAGGAAACGGAGAAGTTTTCGAAGGTCGCGGTTGGGACAGAGTTGGAGCTCACACACTCAACTACAAC
CACAACGGTTACGCATTTTGCTTCATTGGTACATTCACCAGTCACGTTCCTACGGCAGCAGCCCAACAAGCAGCCAAAG
ATATGATTGCATGCGGGCTCCAGCTTGGCAAGTTCAGATCAGACTATATTTTGAGAGGTCACAGAGATGTTGGCTCCAC
AGAATGTCCTGGCAACGCCTTTTATCCGGTCATCAAAACGTGGCCACATTATTAGTAGTGGAATCCGCCATTGGGTGTG
AATGAAAGACTTGTATAAAAATCGTAAACAGTATTATCCATATAACTTGAAAGACATGTAAATTTCTGTAATGTTATGT
TAAATTTATGTTGTATTTTTCTAAAAAAAAAAAAAAAAAATAGGGATAACAGGGA
>Contig311 5281 reads, 752 bases
TTATAAAGAAAAAAAAAAATGAAGATGAATGAAAGTGATGAAGATGATAATAAATTATTTTAAAACCTTTTTGTGTTTT
AAAAAAAAAAAGATTGGGGGAAAAACAATTTACAAGCACACCTCCCAAAAAAAAAAGCAGTACAATGTTTAAAAATACT
GCAAAATAACATCGACTTCTTTATTATTGTTTGAAACTCATTTGGCTTTCTCAAACTTCATACAAAGAAATCGGCGATG
GGCACGTTCAGACAGCACAAATCTTTGACCGGTGGATGAAACTATCAAGTATTAGAGTAGATCGGCGACATCCATAGGC
ATCTCCTCGATGGTAGTGTTGTAAAACTGCTCAATGTCTCGCAATGTGCGAATATCATCAGATGTAACAAAGTTGATGG
CAACACCTTTACGTCCAAAGCGGCCACCACGTCCAATTCTGTGAATGTAATTCTCTCGGTTTGCTGGCAGATCATAGTT
AATGACTAGGGAAACCTGCTGGACATCAATACCACGGGCCAGCAAATCAGTGGTAATGAGTACACGACTCGAGCCAGAG
CGAAACTCTCTCATGATTAAGTCTCTTTCATTTTGGTTCATGTCTCCATGCATGGCTGAGACGGTAAAATCCCTTGAGC
TCATCTTTTCGGTCAGCCAGTCGACCTTCCTGCGTGTGTTGCAGAAGATAACAGCTTGAGTAATTGTAAGGGTCTCATA
CAAATCACAAAGTGTGTCCAATTTCCASATCGGAAGAGCGT
>Contig312 9604 reads, 546 bases
CTTATTACCCTGTTATCCCTATTTTTTTTTTTTTTTTTTGAATTACGATACTGTAAAGTTTATTCTATATTTCTCATTA
AGACGTATGTAACGGATTCTGCTCACAGAAATTCTTTAGGAGTGTAGCGTTTAGCTTTAGCCTCTTCTTATTGTTGGCC
ACGGCACAGTTGTCGTTGGAAGAAGGGTGTTGCACCTACACCGATATCTGGTGGTAACGTTTGGACCATGCCGGTAGCG
TGGGCATAAACGAGTGTTCAGAACACAAAGTCCTCGTCTATATCCCTGGGCGTCACATATTCTTGCACATGTTGGTCCA
ACTCGCCCAGGCAAAACTGGCATGGCATTGCATTCCCGAAACGATTTCCCACAAAAGTTCATGTAAAGTGTATCACTCT
TGCGAGGTCTCACAGTAACAAAGATTGCAAGCAGCAGAGCCATCGCCAACATTGACATCGTGGTCGGACGTTGTGCGTG
TACTATGTATTACCCTGTTATCCCTATTTTTTTTTTTTTTTTTTTTTKWATTATTTTNTTTTTNTTTTAAAA
>Contig313 8467 reads, 868 bases
CGAACAACGRMTCGGGTAATATTGTCGTCTATAGTGAGCTAAGTAACAAACGGGATTAGTGGGCTGATCTTGAGACTCG
AGTTTGTTTGCTGTGCACGTACTCACATCCGCCCATCTGTGTAGTAGGAGATCATTCAGTGAAGAAACCAGCCATGCGG
TCCATCATCTTATTGCTGGGTTTGTTGGTCCTCCTTATGGCCATCAGTCCATCAGAGCAACGCCGACGTCGTCCGAAAT
TAAAATCCTACCTAAATAAGAAAAACCAAGAGGACGAAGCTCCGGAGAGTAGTGCCACGGATCCGCAAAAGTCGAGCTT
TGATCTCGTCAGAGAAAACGTGAAGTGGGAGCTACTCAAGGCAGGCAACTCGAGGATCAGACTTTTGCGCGAGAAGTTG
AGACAAGAGAATGCCGAGCCCACCACGCCCCTGCCCCCAGTTGTATCCGACGAGTGTGGTGGGTGCGAAGAGGGGCAGT
ACTGCCACAAGTACTTCCCGGAATGCGGCGTGAACGATGAGTGCGATGAGGTGACCTACGTCTGCTCACCCGTAACCAC
GACAACCGAGGCTCCAGTCGTTTATTACTAAACATGGACACCGCACACCTGGAGACGCGTCAATGTCCAGGCTGTTTGG
GCACTTGAGAGTGCATTACCAGTGTTAAAAAATAGTAATTAAAAAGAGAACAAAATTTTACAGATAATTCAAAAGCATT
CATCAATTTTTGATTTAAGGCAGTAAAGACAAATTTATTTCAATGCGTTTCGACCACCAATAAAATAACATATCTATAC
TTCTATATTTATATCACTTTTAGCTGTCAAGTTTATCAAAGGCGACGTGTATTATGATGTAGACTTGTAATAATAAAA
>Contig314 12546 reads, 775 bases
AAAAAAAAAAAAAATAGGGATAACAGVCTTGTTAAGCTAGTTGTAGCCAGATATCAAGCTGAAAACTAGTGGCTACTAA
CCACCATGAGACTCCTTACATTTGTAGCCTGCGTTTGTTTAGCAGTTGTTTCTGTTTCAGCAGTTGTCGACAAGGTATG
CACAGACAACTCCCAATGTGACCCCGGAGAGTGCTGCCAGATCCTGAACGAGTTCATGATCTTCACTAGGAGGGCCCCG
TCCGGAACATGCCAAAAGTACGTCCTTAAGGGCGGTGCGTGCGGTTGGTTTGCTGAATACAACGGCTACTGCAGCTGCA
CCCCCGGGACGACCTGCACGGCAGAGGTGATTCCCAACCCGACCACGTCACTGCTGCCGAACTGGAAGCCGGTCCGATC
CAGCCTCGACGATTTGTATATCCTTAAATGTGTTTAGGATTAGACGCGAGCCGAGTGAGATTTCGTTAAATTTTAAGCC
ATTCGTCTCCGTCCCGGCGTTTTGTGAACTGTATTAATAGTATAATATTTCATCTAGGCATTGACAAGATTAGCTTTAG
GAATCAGAAGCATTCTCCAAGAGAACTCTCTTAAATTGAGAAATTATATGTACCTGTGGGCTAATGTAAATCACTATTC
TTTGAAATATTTAGTCAGTGTTAATTTTGTTAAAAGGCATTGCAGTTACAGACAAGAGAATTTGTAAACTGTATTAAGG
CAAAGCCATAATAAAGTAACGTTATGTGCACGAAAAGATCGGAAGAGCGGTTCAGCAGGAATGC
>Contig315 2883 reads, 488 bases
CTTATTTCCCTGTTATCCCTATTTTTTTTTTTTTTTTTTAATGAAATCCAAATTTTATTCATTATCAACATTAAGGGTT
TGTTTACCCTTGAAATCACCACAAGGGACATGTGTCACTAAGGTGTATAGCCTGTGAGTTGAATCCTCATCCTCGTTAC
GCTTTCGGGCAAGTCGCACACGAAGCCTGTGAGGCACATGTCTGATGCCTTGAGACCAGATGTGCTTATTCAAACGAGT
ATCAATTCGTACATCTGGGGTTCCCATCATCTTCTCAGCAAACTTGCGAATCTCTTTGATAGCACGAGGGGCCCTTTTC
TTGAATCCGATTCCATGAATCCTTTTATGTATGTGGATTGTGCACTCTTTGGTGATGACTTCATTTGTCACTGTCTTCT
TCTTCTCACGCTGCTTGCGAGGAGGTGCCATTGCTAGCCAAAGTCGGCAGCCGAAGTTGCAAAAAGGATTACCCTGTTA
TCCCTATTTTTTTT
>Contig316 13229 reads, 643 bases
CTTATTACCCTGTTATCCCTATTTTTTTTTTTTTTTTTTACAACAACCGCAATTTAATTAAGATTTCAAGACTGAATCA
TAAAGTAATGTTTGTGGCGACACCATTTCAGGGTGACTATGACTTGGTGACAACGGTGTAGTTGAATGACGTCATGTAG
GCCAGCATGGGGTCAGCCACCACCAACAGCTCCGTCGTCCCGTCCACTGCCTTGGTGCAAGCCGGGTGTCCTGCTGAGG
GCAAGTTGAGGAGATTGTTGACACCCCCCGTGACCTCCCTGACCTCTGCCACCATTGTGGCCCAGCCCTCCACCAGGCA
CAGTGAGTAGGTCATACTTGGCCTTGACAGTTGAACATGGAGCTTGCCCTGTGGGTAATGCCAGTCTATACGACCGGAA
GTGCAGTTTTTAGGTATCGTGATATTCATCTGAGCATCCGGTCCACCAAAATGGCTCATAGTCATCAAACTGCATCCAT
CGAAGAGTGGAACAGACAGATCCACCAGCAACAAACTGATAAGTGCCAGGAGAGCGGTCTTCATCTTAACTTGAGCTCA
GTGATACGCTTACTGTCAACAAAGGAACGGTAATACTATTACCCTDTTATCCCTATTTTTTTTTTTTTTTTTTTTTTTT
TTTTTTTTTAT
>Contig317 557 reads, 606 bases
GGATAACAGGGTAATCTGACCACTGACACAACACTGACCACTGACGCAACACTGACCACTGACACAACACTGACCACTG
ACACAACACTGACCACTGACACAACACTGACCACTGACGCAACACTGACCACTGACACAACACTGACCACTGACACAAC
ACTGACCACTGACACAACACTGACCACTGACACAACACTGACCACTGACACAACACTGACCACTGACACAACACTGACC
ACTGACACAACACTGACCACTGACACAACACTGACCACTGATGCAACACTGACCGCCGACTCTACTAACACAACCCTTA
CTCCCCTGACTCTGACTGACACACAACAAGGCTGACTCTTACGAACACTGAGTTTGATGACTTCTGTCTATTGAGACTG
ACCAACACTGACAGTTTGATGACTTCTGTCTACTCTGACTGTGACTGAACAAGAATGAACAGTCATTTTTGTTTTGCTG
TAAATGGTGACTGTTTGCGCAGGAAATGTTTTGCTTTGCTGTAAATGGTGACTGTTTGACAAGAATGTTTTTGTTTAAA
TGGTGACTGTTTTTGAATAAAGATGAATATCATGAAAAAAAAAAACATTCTTG
>Contig318 51 reads, 252 bases
AAATATCTCTATATATAATTCTCTNCATGGGACCACGCGAGACAAGCWRSCATGCATCATTATCGAACAAACACCCGGG
GTATGGCCAAGTCCTTAGTAGTAAAGACCTCTACCATATCCCCATCCGCCGAGACCACCGAGACCACCGTAGCCATATC
CTAATCTGCCGAATCCTCCCAGTCCTCCGTATCCAAGACCTCCATATCCGAGTCCTGCCAAGGGAGTGGCCCCGAGATC
GGAAGAGCGTCGTGT
>Contig319 5667 reads, 990 bases
GGCTAGGGATAACAGGGTAATAAAATTGTGATGTTAATATCCCGTGATCCAGCTCAACTGTTTTGAACAGAGAGAGTTA
AAAAGAAACTAATGGTTGGTTTATAAAAGTATAACCAGTTTTGAAACATTTTTTATTGAATCAATAAACACGACCCTGA
GAAGAAAAAAAGTTTTAATAAAATAAGAAAATGAAAGTTATTTTCACGTGGGCCATTGTGTTTGCATTAGTGGCTGTCT
CCCTGCAGGACCAAAGTGTGTGTCTACCTAGCCGGCTACAGTGCATGTTTACAGATCTCCAGACTAGTGAATTCGGTAT
TTTTGCATTGGATTTTGTTGATAACTTGGTAGCACAGGTGACTTACCTAACAAATGGGAGGACAGTTTTCAACCTGACC
GAGAGGATGGCCTATGACATCAATGACACGACAGGTCAGTGTGTGAAGCACCCGATGGCCAGCTATCAGGTCTTTGGAC
AGTGCCTTCCTTCCTCTGCTCGAATGTACTCTCCAAACAACTCGTACGTCGGTCTGGGAATCAACTCTCTTGGCATGCA
AGCCTGGCAGGTCGACCTACCCGAGGGAGCCCTCGCCACCGTCGCATTCAATGTAGGTCAACCGACAGTTCCCATAGCG
TCACAGTTGACCGGACTTGGAGATGGTACCGGGAAAGAGATTTATTTCTACTTTAACTGTGGGGCATCCGCTAGCCCAT
CATTGTTCTACCTGCCATCCACCTGTAACGCCCCTGATGTTCTGAAGTGGACCAAACTTAAAAGCTCTCATTAGAAAGT
GTTTTTTTTATCAGCTTCCATTGCCCATGTCAATAATAGGTTATGATTCGATGAAAACAATAGATGTATGATTTCATAA
TTATAATATGTGTATGATTCAATGATTACAATAATTGTATAATTCAATTATTACATAAATGTATAATTCAATAATTGCA
ATAAAAAATATATCAGTGAAAAAAAAAAAAAAAATAGGGATA
>Contig320 7655 reads, 595 bases
TTGTTTTAAAAGTTCTGTAGCCTTCGGTAGTTTAATAATATTTTTATTTATCCTATTAATTGGTATTTTCTTTGAGTGA
AATGAAGGAGCTTTAGACTGAGTATCATAAAAAAAAAAAAAAAAATAGGGATAACAGGGTAATATACCACTGTCCTATA
ATTCAAAGCATCCACACTAATTGGCTATCGTTCTACAGGTCGAGTTCCAACAATGCTCAAGTTATTCGTCCTCGCTCTC
CTCGCCATGGCCGTGACCGCCCAGGACCTGGCAGCCCAGAAAGCCCACGTCATGTGCGTCATTGAGACCCAGCTGTCCA
CCGACTCGTGCAAGAGGACGGCCAAGTCTCAGGTCAACGCCGCTGCTGACGCCGCCTCCGGATGCGCCACCCTGGAGAC
CTTCCACGGGTTGCTGGGGATCATCGGCTGTAACGCCCACGACTACGACATCCTCCACAAACTCATCTGTGAACACGTC
GACATCCCGTGTGCTCACGCCACCACCGTGGCCCCTGCGTAAACAGCTCCCCCACCCCCATACCACCACCACACCATGC
CCACTCCGGCCACTCTTGCAACATATATCTACCGGTTCAGCA
>Contig321 246 reads, 302 bases
GGGTAATAAGATAAACTRGTAATGTTTTCCTATCGTGTTTTTCTATTCGACAACTTCTCTAGTGTTCTTGTCACAACGC
TTGAGATACATTGTGTGAACCATCTGCCTCCGAGTTTGACTTAACTGCATACTGCACTTCGGCCACCATGAGGACGTAT
CTCCAGTGGTTAACCCTCTGTGTGTCACTAGCCCTCTCAGCGCTGGTGGTGCTCACCCAAGCCAAATATTTGAGAGAGA
CCAGAAACCTTTGGAGAAGAGACCCTCCTTGAGATCGGAAGAGCGTCGTGTAGGGAAAGAGTGTA
>Contig322 6103 reads, 794 bases
CTACACGACGCTCTTCCGATCTGGCCACAAATGCGCATAACATTTTACACAGCACAAATGAGTCACTGCGAGCTTACAT
TTTAGAATTTAAACCTTGACGTTTGAAAAGGTGGATGTATTTTTTTTATAACGCATTACTTAATTACATTTACAGTAAG
CCTTCCATGTGAAATAGTTGAGTAGAAATCGTATTTTTAGAGTTCTAGAGTTGACCCGTGTCCATCAGTACTCAGTGAT
GGTTTCATTAACGAGCAATTCAGTTATGTTGAACGGCTCCACAACTTTGATGCCGTTGAGAGCTTGGTACTCTGTTTCG
TTGATGTAATCGGATTCTGATATGTTCAAGTAGGAGTCGAGGATAATCTCCACACACTCTTCGCAGCACTTGCCTTCAA
TATGGGTCGCTGTAAAGCCAGTTTCACATTCCGCGGCGTCACACATTAATTGCGAACATGTCGCTATGTTGTTTACCTT
GTCTTTACATAGACAAGTCATGCATGGACTTAGGTCAAAAGCTTCTTCCAACTCCAAGCCATCGTTACTTAAGATACAT
TCCTTATAGACGACAACGGCGTACGGTCTGTTCGTGACAAGCTTGATGACGCCTACAATCACCAGAAGCCCAAAGTAAA
TCTTGGAGGACATCTTCGGTGTAATATAAACTGCCCTCAGCCGCGTTCAAATAAAAGTAATAAGTCGCGTTCAGCCTCT
AGCACATTCGCTCGTAGCTCTAAGGCCCACAGTTTGAAATGCTGGATCAAGCAGGTATATTACCCTGTTATCCCTATTT
TTTT
>Contig323 7417 reads, 2007 bases
TTTTGTGCTTTAATTTTTGGTTAAATTATAATTGTGACCTGATAATTAAGTTTATCTCCAAACTTAAAAAAAAGGTAAA
AACATTTTTTACAACAAAAGGGTCAAATTTTTTTTTCAAGAAGGTCAGAAAAGTTTTATTTTGGTTGTTGTTACAAATG
TATATCAGGATTTGTAAAAATAATGAGGTCCGTCAAGGGTCATTAATTTAGATGTCCACTGGGACGTCCAGCTGGTTCC
TTTAACCGAATGGGACGCCGGAGCTCGTGTTGAACAGTGTCACAGGAGAGTCGCACTCATGCAGCTTGCTGCTGACGAA
AGTCCCTAGCGACATGTTCGGGTCGTTGTCACATCGCCCTACGATGTTGGGGATAAGTCCGGATTGAGCTTGCCAGCCC
ATGATCCAGCTCAGGTCGCAAGTACACGGGATGGGATTCTGGTCAACATACACCGTCCGAAGTCCATCGGCCTTAGAGA
GGGGTTTAGGCAGGTTGGTCAGTGAACACCTTGACATCTTTAATATTTTGATGCTGTGTGCGCTGTTGAAGGCGTCTGT
CTGGACGATCTGTATGGAGTTGTCTGACAAGTCAACCGCCGATAGTTTGTTGGCGCCGGGAAACGCAAAGTCCAGGATG
CTGTTGATTTGATTGTTGGACAAGTCCAGCGTGTTAAGCTCGTGAATCTCAGGAATCGATGAGCTTGGTATGTAGGACA
GGTAGCACCTGGCCAGGTTGAGGTTTGTGAGGGAAATCAGTCCAGCAAACGATTTGTACGGTATACGAGACAGAGGATT
GTCGTTCAGCATCAGCTTCTTCAACTGTGTTAGAGTAACGAAGAGGTTGTCATAAAGGGAGACAAGTTTATTGCCACTG
AGATCAAGTTCTTCAAGACTTGTCAAATTAGTTATCGCCCTTGGCAGTGCCATCAGACGGCAGTAGGACAAGTTGATGA
CCCTGAGTGTGGCTGATGATTTGCTGAAAGTAGAACTGCTTCCGGTGTTGAGGATGTCGTTGTAATTGGACTCCATGGG
ATTGTTGCTCAGATCCAATTCCTCCAAAACTGTTAAGTCTTCTAAAGCATCAGGAATGTAGTGAAGTTGAGTAGATGAC
ATGGAGAACTTCCGTAGAGTTCCAGACATGTTCTTCAGTGCTCCGTCAGGAATGGAGGGGATGCGGTTAGCAGACAAAT
CCAGCAGCCAAAGATTGGTCAACTTGGAGAACTCTGCCTGGAAGGTAGTTAAACTACTGTTGATCAGATGCAACTCCCT
CAGGGTGTTGGCAAAGGCATGCACTGCCCCGTCCCTCAGAAACGTCACAATATTGTTGGACAGGTCCAAAGTCTGAAGT
CTGACCAAGTTATTCAAGGCAGACGGCCAATATCTTATGCCCGTGCGACCTAAGGAGAAGCTGATCAGCGATTGGCCAA
TGACCGCGGTGCTGGTTGATGATATGCCCGGAATGGGGTTACTCTGAATGTTTAAAGTCTGCAGGTTCTTGAGACCAGC
GATGGACGCTGGGAAACTGGTCAGATGTGTGTCCTCCAGGTTCAGCTCTAAGATGGTGTCCTCCAGACCAAGGAATGCA
GTCGTGTCAAATGACGTAATGGGGTTATGGCTCAGGTCAATGCTGCTCACTACAAAGCCCTGGAAAGCGTCCTTGGTTA
CAGTGCTAATGTGATTCCGACTAAGATAAAAGCCCAAAAATTGTTGACCGGAAGTAAACATTGACTTTGGGATGGACGA
CAGATTCCTTCCCTCACAGTGGACGCTGATGTCACAACTACAGGGAGCAGGGACGGGACACTGAGCAGTCAGACATGAC
GTCATCACAGCCAACGTCATGACCCATAGCAGAGATGACACGTCTAGTTGTTTAATCATTGATGATAAGCGGATGTTAT
ACAGCAGTTTCCCGATGTCCAGTGAGCACTTGAATTCCTCTGCGTTTAACTGTCCACTATCCCAGAGCAAACAATGTGG
TCAACTATGAGACTGTACACAGATRTTAYTAT
>Contig324 6457 reads, 913 bases
TTTTTTTTTTTTTTTTTTTTTTGGTATARGTGAAATCAATTTATTTTCACAGGATGTTAGATGTAAATAATAATTAAAT
AACACCCAGAAGAAATCAAAACACAGTTTCAGGCAGAGTACAAATCGGCGGGATGCCCAGATGACTTGAATGACCATTT
AAATATCTTGAGTTAAAAAAGAAGATGTGCTTTCCCATATGATTACTGCTTTCGCCGATAACCTCCCTGTAAACGGGGA
AGCTGGGGTTGCTATTGGTGAATACAACTTTGAACTCTCCGCCGCCTGAGAGGGGTACTGTGTAAGCAACGACGGAATG
AGCACCAGTACTGGACTCTTCACCAGAACGACCGACACTCCAGTTAGTTGTCTGATTCAACGGAGTAGATGACGCTGGT
AGGCACTTAGGAGGAACCATAGCAGGCTCCACTTCAAAGCTCTCGCAAATGCCGTTTTGTATGAGGTAACCTGTCATCG
AGGAAAAGTCATACACTATACGAATGCCTTGAGAATGGACAAGGATCGCACTCCTATTCCTGGCGTGATTCACTACCTC
GAATCCCCAAAGATCATTGTCAAAGTCGTAAAAGTCCAATTGATATTTGGCGTATGTGCAGATGGTTTCAGGCCCCCCG
TGTGCGGCCTGGACTGCGGCAAGCGTTAATATGGCAAGTATAAGGATCCTCATATTTTTCGGGGGGTTGCTTCTCTGAC
GGGTTTTTTCGGTTGAGTTGTTCTTACAGCTGCTGGAGGATGCGAGGATTGCAATGCGCTACTCAAGTCTATTACCCTG
TTATCCCTATTTTTTTTTTTTTTTTTTCAACAAAAATTCCTTTATTTAAAAAAAAGTCATTTGCTAAAACAATCTATTG
AAAGAATACTACTACRCACAATTAACATTAAATTTATAGCAGTC
>Contig325 10058 reads, 917 bases
AATTATTRTAAGGTGAGTTATTAAAAATKTAATTTATTTTGCTTTTAYTGCATTAAAGTAGCACAAATAATTTGTGTTT
TTCATTAAAATGCGGTTATTCATTAAAAAAAAAAAAAAAATAGGGATAACAGGGTAATATTCATTTCCAAGACCACACA
GAACAACACGCGCCATGTTTATTTTGGTCCTAGGAGCTCTCTTAGCCTTCGCTAACGCAGCACCAAGAACATGTCACGG
TGACATTAACCAGCTGCACCCAACCGGTAGAATAGCTGGAGGTGTTGCCGCCTCCAACGCTCTGGTACAACATGATCTA
CCAGCACTGCTAGGACATAGAGACTGTTACCAGTCAGTAGCGGACAAATACTGTATCCAAGCATCCGTGATTGCCGCCC
TCGCCAGCAGAGAGTCCAATGGAGGCACAGCCCTTATCAACGGTTATGGTGACAACGGAAAGGCCTGGGGTATCTTACA
GTGTGACCTCACCCACTCTGGTCTGCCCTGCACCACGGTGGGCTGGAACAGCTGTGCTCACATTGAGATGATGGTCAAC
AGAAAAGTGATTCCAGACATTGAACTGGTTCTCGGCAGACACACGACATGGACTAACTCCCAAGCTCTTCAAGGCGGTG
TGGCTGCTTACAACTTTGGCGTCGGCAATGTCCAGACCTGGGGTGGTATTGACGTGGGCACCACCCAGGGCGACTACAG
CAATGACGTCATCGCCAGAGCTAAATGGCTGTATGCCAATGGATGGAACTAATTTCAGCTAACCCTTGTTTAATGAATC
ATAAATTTTTTCATGATATGCTAAATAATGAATGAATATAACATGCATAATAAATTAAACACAATGAATATTTTTCATA
TATCAGATATCTTTAAAAAAAAAAAAAAAAAAAATAGGGATAACAGGG
>Contig326 2780 reads, 1149 bases
ATAGCTTTGTTGGTCAAGGAGCTGGGGAAAACAAAAAACGTCACAGCCGCAGACTTTCATCTGATTGGTCACAGTCTTG
GTGCTCAGATTTCTGGGTATGGAGGGGAGAGAATCCCAGGCCTGGCCAGGATATCTGGAATTGACCCTGCTGGTCCATA
TTTTGAAAACACTGACCCTGTTGTAAGACTGGATCCAACTGATGCTCTTTTTGTGGATATAATCCACTCAGACGGAGAA
TCCTTGCTACAGTTGGGTCTAGGCATGAAGCAGGCCTGTGGTCACTTGGACTTTTACCCCAATCTTGGTCGTGATCAGC
CTGGCTGTACTAGGAACCCGTTCACCCAGATCTCTCAGTGGGGTCTTTCGGAAGGTTCATTGGAAACACTTATATGCAA
CCACATGAGGGCGTTCCACTTTTACGTCGAGAGCATCAACTCCAGATGTCCTTTCATGGGTTACCCTTGTAACAACGAG
AACGACTTTTTGAATGGTAAATGCAACTATTGTGGGCCTGATGGATGTCCTTACATGGGTTTCCATGCAGATAAAAGCA
AGCTTGCAAGAGGTCAAACGAAATTGATATACTTGACAACAGCTGACAGACAACCCTTCTGTGAGTATCATCTAGAGAT
TAAGTTAAAGTTGAGTTCCAGCCAGGGACAGGAAGAACAGGGGCAGATTTCAGCTGTTTTCACGGGAGATAATGGCAGC
ACATCGAAAATTCAACTCAACACCAGTCCAATAGTATTTAGGTCTGGAGATGTCCATCAGTTCTCGGCAGCCACGCCTT
CTGATATTGGGAATATCCGGTCAGTTACCCTGTCCTTTACCCACATCGTTCCTCTCCTGAACCCCTTGCAGTGGAACAT
TCTGGGACTTAGGCATCCAAAGTTGTACATTGATGAAGTTGATATCCATAGACAGGAGGCCGACACAGATACACGTATG
TGTGGCTCCGGGATCAGTGTGGAAACTGACCACTCCATTACCTTATCACAGCCTTGTTAGAGTGACAAGAAACTGACCA
CTCCATTACCTTATCTCAGCCTTGTTAGAGTGACAAGAAACTGACCACTCCATTACCTTATCTCAGTCTTGTTAGAGTG
ACAAGAAACTGACCACCCCAGATCGGAAGAGCGGCGTGTAGGG
>Contig327 3608 reads, 370 bases
ACAGTCGGCAAGGCTGTTACAGCAGATGACGCAGTGGCCGTTGTTGCCAGCGTTATCGCAGCTGTTTTGAGTTTCCTGG
TGGGCACAGTTCTGGGCATCAGAGCAGTGGTACTCGATCTTGTTGTCTCTCAGTTCGATTCTTGTTTCACAAGCATCGT
GTTGGGCCTGGCAGTCCTGTTGTCCTGTACATGTCGTGTAGTCGTTTTGATCGGAGCAAGTCGGGCAGACGGCAGCGTT
GACACCGTAAACCACGGCAGTTGCCACTACGAAGACAATAGCGAAATGCATTGTGTATCTGTATCAGAAGCAATGAAGC
AATTGAAACAGCTGATTTCTCTCAAGTGAAAGTACTTACCCTGTTATTTTTCGG
>Contig328 16782 reads, 519 bases
CCCTGTTATCCCTATTTTTTTTTTTTTTTTTTGGCATTTCAGATCTTTTATTATACACAGAGATACATGTATATATTTT
ACAATCTTGGAATGCATTTAAAAAAAAAACCCATCTCATCTTGTTATCTTCTATGTCATCCTATTTGTCCACTGGTTGG
GGCATGTAATAGGTTGGACTTAGTGGTGACATCACCATTGTTTACGTGTGACATCTGCAGGCCACATGGGTCATGCCGT
TGACGGTGGATGCACCAGCGCTGATGCTGCTGAAGCCGTCAGGACAACAATAGGTCTCTCCATTTTCATGTGCAACAAT
GGTATGATGGACACAAGCTGAAACACCCACTATGCAATCAGAATTGGCGGCCAGTGAGAAAGTCAAGCTGGCAATGATC
AGGGCCAAGAAAAACAGGATCTTCATGGTGATATCAGGTGTTGTCTACAGCGAGGGAGTTTCTGAGAAATCTGGGTACG
TTGACTTGGATTATTACCCTGTTATCCCTAGCCTATAGTGAGTCG
>Contig329 7883 reads, 585 bases
CCTGTTATCCCTATTTTTTTTTTTTTTTTTTTCTGGATGCATAAACACTATTTAATTTTTAAAAACATTTGTTTTTTAA
TTTTAAGCACTTGTAATTTTTGTGTAATCCGTTTTCTAATTTATTCCATCATCATCCGATCATCTCCAACTCCAAACGG
CGGCATGTCGAGGTCAGAGACCTACTGACCACACGTTCGCATGCAGTCACTGTAGGTGAGAAACACGTTGTCAGTCCCG
AAACAGCCGCTGTAGCTGAATTGGACACAGGCTTTGAGCCTATGGTCGTAGTGAAACCTCCGGAAATCTCCGGAACACC
TCGCGAAGCCTTTCAGTGGTGGCTGGAGGCAGACATTCGCGGCTTGATGAGACGACCGCAGACCGGCGAGAACAAGCAG
ATAGAACAAGGCGATCTTTGAGTTCATGCTGGCAACTGACTTGGGATGATAAGTTTCAGAAGACAATAAACAGTTTTTC
ATAGGTTTTCTCGGCTGCGTTAGCCTAATGTGTTGCATACGCGACTGGTCTAGCAACTCATTCACTGTCAACTGTGTAT
TACCCTRTTACCCTGTTATCCCTATTTTTTTT
>Contig330 13706 reads, 674 bases
TTCCTGTTATCCCTATTTTTTTTTTTTTTTTTTGCATAGAAACTTTTTTTATTTTATTTTGACTGTCTCCAACACAAGA
TATTAACTAGTGCACAAGAGCAAAAAGGACAATCATAAGTTGGGATCCCTCACAGAACTGCTAATGTAGACTTATTGTT
TCTTCATTTAGCCTTTAACAGGGTAAATGTTACGACTATTCACAGACCGGGTCAGTTGTTACTAGCAGTCTTTCATTTT
CAGAGAGCCAGGGCCTTGACCAAACTGTAACCTGGCAGGTTTCCGTCTTTGTTCCCTGAGTGACTAGAAGAGTAAATAT
GTATTTTGTTCCTGCTACAATCTGAGATTGCGCCTTGACCACTTTGACCAATGGTCTGATGGCGTTATCACCCTTTTTG
GCATAGTACTTATTGAAGGCCTCAAGAGCCGTCTGGACGAAGGTGTTGTTTGAGTCCAACAGTCCTGGTTCATTCTTGA
ACCCGCCCGTCATGAAGGGGTACATCGGTACAATGGTCACGGCAAAACACGCGAGAACTAGGTACAACATGGCGGCAAA
TTCGTAAACTGACGAGGTAACCGTCTGATGTGCGTCTGTTCACCTATGGAAAGATTTACCTTACTGGTGGCCTAAACGT
CGTCTTCCTACAGGTTCCTAGTAAATACAGGTCGCCCCGGAA
>Contig331 7439 reads, 1055 bases
TCTAAGTATAAACAAAACTGAAAAACACCATAGAACCTATAATGAGTTGCAGAAACATTGGTCATCACTGGTACATTTT
TAAAAAGCATTTTTAAAAAAATAATCTAGACTGATACATTTTTTTTTATTTGAAAAGAATAAAAATTATTATGGTTATA
TTTCGATGAGGCTTTCATTAGATAAAAGTTTTTAAGTTTTTCAAGGATTACCCCAAACATTAACATTCATAAATGCTGT
TGTGTCCTTTAAAGGTACTGAATCATTTGAGTTGTGCCACAATAGCTTTGCCAAGGGAAGACGATGAAGCAGGGTTTTG
TCCAGTGATAAGCCTGCCATCAACCACAACATTCTCTTGCCAGTTATCTGCCTGGCCAAACGTGGCACCTAACTCAACA
AGTCTTGTTTCTAACATGAAAGGCATGTACTGAGACAGATTCACTGCATCTTCTTCTTTGTTGGAGAAGCTTGTCACCT
TTTTACCTTTGACTATGGAATCCCCATTGGCAAGCTTGACTGGAACTAGACCGGCAGGACCATGACAGACAGCAGCAAC
TACTCCTCCTTTGTCATAAACTTGTGCGGTTATCTTTGCAATGGTGTCATCTGTTGCTAAATCAAACATGGGCCCATGA
CCTCCAGGATACAGTATTGCATCATAGTCACTGGCCTTGACCTGTGAGGCAGTCTTGGTGTTGTTCACCAGGGCCTGGG
CTTTAGCATCTTTGAGGAACCATTGGCAAGCTGCATCGTTTTTGAATGCTTCAATGCTATCAGCATCCAACGGTGCCTT
CCCACCCTTAGGGCTGATGGCATCAATGTCTGTGAATCCCGCATCCACTAACACTTTGTACGGGTGGGCCAGTTCTGGA
AGATACCAGCCTGTTGGCTTGCCAGTTGCAGGGAACTTGTCTACGCTTGTCAGGATGATCAGAATCTTCTTTCCCATTA
TGATTGTTTTTAAGAGCTGTGCTTCCCAGGTACACCTCAGAAGATCAATGCAGCCACTATAGGTGCACGCTTGCAGGTG
TGCGTTGATTTTATTACCCTCGGAAGAG
>Contig332 7441 reads, 1336 bases
CCCTGTTATCCCTATTTTTTTTTTTTTTTTTGCTGATTTGAATCTTTATTTCTTTAAAATTATGTTTGGAAAAAAGTAA
ATCCAAAAATCCAATAATTGAAGTATATAAGAGAGACAAAGGATCTTCAGCGTTATAGTTATTCCTACATTGAAAGGGT
CGTTCATGAGACGCAGCTCCTGATTTCAGCTCTGGTCACGGTTAGCCACTTGTGACGTTAGCATTGCCGCCACCACTAA
CTGTCACGCATGCGTTGAGACTGCACGCCTCCTTGCACGCGGCTTGAGCGCCGACCGAGTGCGGTTGTAGGGCATCACA
ATTAGGGCAAATGTCCGCACAACCCCTGGCCTCGAACAACGTCTCAAAGGACGCCGTGCATTGAGCGCTCTTTCCATCT
TGGCATTCGATGACTGCCTCAGCAAAGATGTCCAGTGTGTTATCGAGTCTGATGGGTTGGCCATTTACACAGAAGAAGT
CCAAAATCCCCAGGACTTTGTCCAGTCCAACCTTTTTGATGAGGTCGAACACGGGCTGTAAGCCAGCAGCCGATAAGAT
ACACAGGACATTGTCCAGAACATCGAGACCAAGTAACTTGCCATCTTTTATGAGGAACTCGGCCAGCTGAAGAAGTTGG
GGAACTCCCAGAGTTTTCAACAGATCAAACAACACATTCTCTCCTAAGCCGTTCAGAAGAACAGACAGAACACCGGCAC
CAGATGTTCCATTGACAGCGGCGCAAAGATCTGCATTTAAACCTACAACAGCAGTAACGCCCAATGGTTTCAGTAGATC
TACGACAACTTTCAGGCCAAGATCATTGACCAGACAAATTACTGAATTCACAAGACCTTTTACATCAAGCGCGCCGTTC
AAAGAAGCAAGGATGTCTTTCAAGTTAAGAATGTCGGTCAAATTCAGGCCAAGGAGTTGGTCAAGATTTAAGAAGGATG
TCAGGTCGGTGACCAGCCCAACAATAGAGGACAAATCCAGAGTGGAAGATCCACCTTGACAAGTTAAGTTACCGACAAA
GAGAAGTTTTTTCAGGCCAAGTTGTTCCACAAGTTTCAACACGTCTCCAGCAACCGGAAGTGATTTCAACAAACAAACC
ACAGGCTCTAGAACATTCAGTCCACCTTGGAGAAGGGGGCCTAGTATTCCACCAGCACCCGGGGCGCTACACGCTGAGT
TCAGAGCCCCCAGAAGTGACAGATTAAGTTCCCCCAAAAGTTGTTTTACTCCGCCCATACCAAGCATGTTCAAAAGACA
TCCGACTTGACCCAAAAGTTTATCTAAGGGGAGACCAGTAGATTTGATCAAGTCGCTGAATAGAGGTTGTCC
>Contig333 7658 reads, 537 bases
GCTAGGGATAACAAAAAAAAAAAAAAAAAATAGGGATAACAGGGTAATAACAGAGTTGTATTCCGCTACAGAAAGCTTG
AAAATGGCTAAGTGGCAAGTTCTGATTTTTCTAAGTTTGGCCTTTCTAGTGGCCAGCACAGTTGCCGCACCTGCAAAAG
AAATTGTGAGGCGTTCACTTGGAGAAGGAGATATTGACTGCCGATCCTACCCTTGTTTCGGTCCGCCAAGACATGAAGG
CACTGCGCCTTCAGAACCGACAACACCAGCCTACTAGCAACACCGCACAAACTTTGGATGGATGAAATTTTGCGATAAA
AACATTAGTAGACAGCTGAAACGTGTGCAGCTTACATAATCTTTTCTGTAGATATGTATCAAAGTCGACTGGCTATAGC
TTCAACAAGTCAAACTATCAAAATATAAGGTTATATCCGATTGGGAAGACATATTTGTGGGGAAAGGGAATTTATCAAT
AAAGCAGTTATGCTGTAAAAATATAAAAAAAAAAAAAAAAARTAGGGANAACAGGGTAATAAG
>Contig334 147 reads, 249 bases
GAGATCTACACTCTTTCCCTACACGACGCTCTTCCGATCTGTCCGTTACAATGAGATAGAGGCTCAGCGTATGTTGTTT
GACCTGCTCATGGGCAAACCTGACAAATCGGCGTTACGCAAAGTTCCCGGCCTGAAGACCTACAATTACGTCAACTGTG
GCAACCCTACCAAGGATCTGGCCAACCTGTCCCAGCTGGTCATAGGACCTGACCCACTGACCTTCCCAGGACCACTGNC
AACATGCGCCAC
>Contig335 5246 reads, 701 bases
CCCTAWTTTTTTTTTTTTTTTTTAATGTAATTAACTGTTTATTAAACAGAAATCTTTATTCCTGAACAACATTAGTTCT
CTCTGACACGTAGATACCATCCAAAAATTTGCGGATATCCTTATTTTTCACAGCTGTGCACTGTTGAATAAGGGCAGCT
GATCTAGATACAAGTTCAATATCATTTCCCTCAAGAATGAACTCATCCTTGTTACCAGATGCCTTAAAAGAAACACCTT
TCAACATATCCACGTGACGTGTGAACTTTTCTCCTAAGAAGTTCCTGATTTCTACACTTGTGTTATTGTTAGATACAGC
AACATTGATGGGAAAGTGAGCATAGACAGCTCTCATTTTGTAAAGAAAGCCCACAGTGACCCCTTTGATCATGTTTTCA
ACATGAGCAATAACCGTTCTCACAGCAGCAATCTCTTTGTGTTTGCCAAACCACTTTTCCACCTTAAGAACATCTGGCT
GTGGCATGGAAATGTCAATAGGCAGGTGTTGGAAGCTGCGGACAAGTGTTCCCCGTGGGCCTTTGACTGTAACTTTCCG
TGACTTTACAGACACAGTCACCCTTTTATCCTTGACCTTCACTGTCTGGGTAGTGTTAATGGTCTTCATCCTGACTACG
AGTCGGCAACAGGATTAAAAAGATTACCCTGTTATCCCTATTTTTTTTWTTKGAAGAGCGGTTCAGCAG
>Contig336 1433 reads, 340 bases
GGGTAATAAAAAGGGAGAAATTGAACAAACGGTTTTGTAGTGCAAATCAGCCTTGATCATCAAGCCAAGCATTTTTATT
GTTTCAATTGATACATTACTTGATTTCCAGTTTGGTGAGAGCAGGTTATGTCTCCCAAGGGCAGTAAAATGGTTTCTTC
CCCGAAAACCACAAAGCCATATGAAATCACTTCTGATGACCTTGCAGAAAGTGATCGCCAAGCAGAACGTGATCACCAA
GCAGAACGTGATCACCTAGCAGAACGTTATCGCCTAGCAGAACGTGCTCGCCTAGTMGCAGAACGTGATCGAGATCGGA
AGAGCGTCGTGTAGGGAAAGAGTG
>Contig337 6668 reads, 1021 bases
GCCGCTGCCCAAAGATTGAGGAGCGCTGGGGCGACTGTATTCTCTGTGGGCATCGGGTGGTCAGTTAACGAGAGGGAAC
TTTTGAACATCGCCAGCCGCCCGGAAAATGTCTTCAGATCCAACGACTTTGATGTTCTGGGAAACATCCTGCTCCAGTT
GGTCAAGAGAACTTGCGCTGCTTCCGGTGGGTCAGAAGTTTCTGTTGTGGTCGAGCCTGCTCTTCCTGAACAAGCGCCA
GCATGCACTGCTGTCGTTGACTTCATCTACGTCTTGGATTCCTCCGGAAGTATCGGGCCGATCAACTACCAAAAACAGA
TCGACTTCACCATCGATCTGGCCTCCAACTTCAAAATTGGCCCAGGCAATGTCCAGTTCGGCGCAGTTGTTTTCAGCTA
TATTGCCCAGAAATATTTTGACCTGAAGGACAATCCAACTTTTGCAGATCTTCGCAGGTCTCTATCGGCCACCCCATGG
ATGAACTCAACCACGAATACTGACAAAGCTCTGGACCTCATCACCAGTGCTGGAATGTTTTCACCAGCTGCTGGAGCAC
GTAGCAATGCTAAGAAATTCGCCATTGTGATCACAGACGGCCAGTCCAACAACCCAGCACTCACCCAGCAAGCTGCAGC
AAAACTTAAAGCACAAGGTGTCACACTCCTTGCTGTAGGCATTGGCGCAGCACAGGATACGGAGTTGCAGAACATTGCC
AGCGGTTCTCAAAGTGTTTTCAAAGTTAACAGCTTTGATGCTCTGAAACAAATTGTCGATTCAGTGACCCAGCGTGTGT
GCCCAGGAACCTCAGGCTAAAAATCGTGTACCTAATCTTAAACAGTGGGGAAATTTCCAAGAAACATGACCATTTTACC
AACATTATAATTTAATCTTTTGAGAATATACCCTGAAAGGAAAGACACGATATAAAAACAACATTTTTTTGAATACCGT
TTATTGAATGTTCAAAGTTTAATAAATGTCTTTGTTTCAATGAAAAAAAAAAAAAAAAATAGGGATAACAGGG
>Contig338 121 reads, 219 bases
GGGTAATTAGGCTAGGAATAACAGGGTAAGTTTAGCTAATGTAACACGTGATTGTAAGTTGATTTTTAAGGTAATAATT
ATTTTTTCACTATCTCTTTTTTGCAACAAGTTTTAAGTGGCTGCAATTAATTTCTCTGCAAAGAAATGTCAACCATGTT
TACAGTTGTGTTGGTAGCCCTTGCCCTAACCAGCGTCACAGAGGCCACCCTCCCCCCCCCC
>Contig339 10802 reads, 877 bases
TGGCAGTCGCTAACGGCGCTCTGATCAAGGAAAACATACACGGAGGCGAATGTGTGTGTACCAACACGGATGGTGTCAA
CGCTAGGGATGCAGGTGGATTGAGCAGTCACGTGGTGGAGACACTGTCCAGCGGCTCCTGCGGCAAGATCAACGGCGGA
ATCCTGACAGCCGACGGCTACACATGGTACCAGGTGCAGTACAGCGGCAAGCTCATCTGGATTGCAGGAAATTACCTCA
ATGTTCACCCGGCCGCTGACTGCAATGGCCAGTGCCCTGCTGCCTCCAAAGCCATGGCGTGTGCCCTGCTGGACAAGGC
TAATGCTGGAATCCTCAGCCTGGCCAAGGTCCACCCGTCAGGTGTGGTGGACAACGCTTTCGCCTACAACAACATCAGG
GACATGTGTAACGGCCTCAAGGCTTCGAGATCACACTACTCCTGCTCAACCTGCCCCACCGGCACACCAGGCGGCACCG
TGTGTCTGACCCATAACCTGCTCAGCTACTTGACCACACTGGTCAGCAAAGGAAAAGTTATCGTGAACGAACTGGCTGG
AGCTTGTCACTCCTGTGGTTCCAGACATTACAACGGTCAAGCTGTTGACCTTCATAACGACGCCAGGTCTAGCGAGTAC
CTCAGTACTTGCACTGCCATGCAAGGATGGGGACAGAACGAGGGCGATCACATCCACTGTCAGTTCTATGACTAATCAC
ACAGTGAAGCCATGGGAACAGACAACCAGGCCATCTATAGACTCCAGGCTTCTCGAATTGAAAACCAGCAGAGGAAACA
AAAACATTTTCTATATTAACTTGACTTTAACGGAAATAAAATTGAAGTTAAACAACAAAAAAAAAAAAAAAAATAGGGA
TAACAGGG
>Contig340 8589 reads, 678 bases
AAAAAAAAAAATAGGGATAACAGGGTAATACACACTGCATACAAGAGTCACCGGAAATTGACAACATATTCACTGCTGT
TTGCTTTCTCTTGGAAAATATTCAGCAGCTGACTGCAAGCATGATGAAACTTGTGTATGTTTCCATTCTCTGTTTGGTC
TCAATTGTGAGCTCAGAAAACAAAAGCTACCAATGCTTGACCGGTGATGCGTGCCAGACTACCGCCAAGAGCTTCAGCT
TCATCAACGGCGTAGTCTACTGCTGCAACGATGGGGACAACATGTCAATACTTGGACCAGGTGTTTCCGTTGGAAACAT
CCTCATGGGAAAAAGAAACATCGTTATAAATAACTTAGACCAAGGCCAAGGACACCTAAACTGCACCTGCGGAGTAGTG
GATCCGGCTACCCTGGCCAAGGTCAATGAGTTCACAGGTCAACTTGTCGATACCATCACAAACGAAATTTCAGATGTAC
TGCACAATATTTTTGGAGACAAATAAATATAATCTGGAAGAAATGTTTAAAATGAAAACTTTAAAAACAATTTCTATTG
AGAAACTCTGTTAGGAAAACTTGGACTATATTCATTGTATTATCTTTTGCTTAGCGATGAATCTTTGAAAAACAAACAA
ATAAAACATTTATTTAATTTTAAAAAAAAAAAAAAAAATAGGGATA
>Contig341 6291 reads, 698 bases
AAAAAAATAGGGATAACAGGGTAATACTGAAACCTGGCACTTTAATTATTAGCTTGAAAATAAACAAAAGAATTCTACT
AACAAAATCGTCGGCGTTTTAACGTCTAGTATTTCCCCCTTTGAAAGCCTTCATAAACTTGATTTTGCCTTGCTGTAAT
GGCTGATGAAGAAGCAAGCCGAACAGATTCACATCACAGCAGTTCACCTGCAACGCCTAGCATTAGTAATCCAGGCACT
CCACGATCTGAGGTTTCTCAAGACATACGTGCCACCCCACCATTAGCTAGAGCGACTCCTCCATTAGCTAGAGCCACAC
CGCCTCTGGCCAGAGCAACACCTCCTTTAACTCAAGGCCAACCTCAGCACCCTCACAGTCAACAAGTACCTCCTGCAAG
AACTGTAACCCAAGCTCCCCCAGCACCATCTCCACTTGCACAAATGCATCATCATCAAAGTAAATATGCTTCACTATTA
GCTGTTATAGAAGATATGGGTAGAGACATTCGGCCTACTTATGCCGGCAACAGAAGCTCAACGGAGAGATTGAAAAGAA
GTATAGTACACGCCAGGATTCTTGTGAGAGAGTGTTTGATGGAATGTGAACGAAGTGCACGAACATAGTATTTATATAT
TATTATTAAGATACTTGCATTTAATTTCAAGTTAAGCGCATTAAGTTTAAATGATTTCAATAAAAC
>Contig342 202 reads, 305 bases
GTCACACACTCTAACACTCATAGACAAATAAATTATTATAAAAAGTATTTGGCAAAGTTAAATGGGCAATTGTAATACG
ASTAACTATAGGCTAGGGATAACAGGGTAATATTCGGCCCTCAGCTCCGCCACGGAACACAGCGCAGTCTCGGGACCAT
CTTTGTGTAGACTAGTCTTTGCCACCCTTCCAACATGTCTGACAAGCCAGATCTTTCAGAAGTCTCCAAATTCGACAAA
AACAAGTTGAAGAAAGTCGAGACAGCGGAGAAGAAATCGGAAGAGCGGTTCAGCAGGAATGCCGAGAC
>Contig343 12984 reads, 460 bases
AAAAAAAAAAAAAAAAAAAAAAAATAGGGATAACAGGGTAATACAACGCCTTCAACCTTCCCAAGAATCTTCTCTCCAA
GTCCGAAGACTTCCAAACCCAACAAAGAAAATGATGACCAAAATGATTGTGTTTTGTCTGTTTGGCATGCTGTGCATTC
AGCTGTCCACCCAACAGAATGCTATTTGTGAACTGGAATCTGCCGCTGGACCTTGCAGAGGAATCTTCCATCGTTACTT
TTACAACAAAGTCACCGGTGCATGTGAGGTCTTCACTTACGGAGGTTGTGAGGGAAACGCTAACAATTTTGAAAGTGAA
GAGCTCTGCTTGGCCACCTGTAAGCCTGCCCTGAAGAAATAGACACGCCTCTATTGGGATGAAAACATGCAGTTTTTAG
ATAAGAAATTCAAAGCCCGATGCTAGATCTGGACGATCGGAAGAGCGTCGTGTAGGGAAAGAGTG
>Contig344 10268 reads, 700 bases
AAAAAAAATAGGGATAACAGGGTAATACACCCAAAGCCATTATCTCAACATATTTTTAAGGAGAAGTGTTGAAGAAGAC
TTCAAAATTACAACAATGAAATTCATCATTTTCCTGATCAGTGCAGCTGTGCTGGCCGCTACTTGCAGTGCCGCAGGAC
TTTGTGCCACCAACTGCAACGCCGTCTGCGCAGTCCGAAAGCAGGCGTGCGAACTGAACGGTCTGTTCGGCACCCTGTG
TCAGACAGACAAAAACGTCTGCTCCAAGATCTGCGACATCAACTGCATCTGTGTTGACACCTGCGGGGAGAAGGCGCTC
ACAGACTTCGCCGCCTGCAAGAACAGCGACGGCTCCCTCGGGGGGCTTAAGTGTTTCTACCCCCTCCTCCAGGGCACCC
TCATCTGCGGCACCCAGTGCGTGGCCACCACAATCTCCTCAGTCGTCGGTCAGATCATCCCCGGAGCCGCAGCGTCAGC
AAATTAACATGGCGTGACGTTTTTGAAGTGTATTGAGATGAAGCAATTACTAACGCGTGTGCTTTGAAGACACTCTAAA
CAATGAGATATATCTTTTCGGCTTGATTTTTTCTGGTCTCTTGTTTGTACTCATTTGTTGTTATTTATGTTAAAGTTAA
ATTATCAATAAATTCATTAGCCAAGTGTATTGGTGACAAAAAAAAAAAAAAAAATAGGGATAACAGGG
>Contig345 6037 reads, 885 bases
TTCCTTCATCAACGGTGTTTCGCGCTCGTCATTGAATGCAAVAAAAAAAAAAAAAAGAATAGGGATAACAGGGTAATAT
AAGTCGTTTGAACTGTGTGGTAGAATTGATGTTTTCATTTCCACTCGTTCGACTACAAGATAAAACGTCGGACTAAAAA
GGATTGAGAGTATCTTAGCTTTGGTGAAGGACCGGGTGAGGGGTCGTTTTGAAAGTAAATTGATAGACCTAATGAGTAA
GATGCCCTTACTTCTACTGTTAGCGTGCCTCACGTGTTTTAAACCCACAGAGGACTGTGCTGTCACCGGACGTAAGAAG
GACGGCCCCAACAATCTGTACGAGCATATCTGTGCCCAGAAGTTCAAATCGTGCGTAACCCAGCGTTACAAAGGGGAAT
GCGTGGCTGAGAACGAACTGTGCAGTCCTGACGGGAATTCCCGTTACGGCTGAGACGTCGAGCAGTTGGTTATATACGA
GCGAGACGTAAAACATTAAGATTGTGTTGCGCCTGAGACGTACAACGTTTGTTACGGCACGTGTTTCTAGATATATATA
GCCTTTAAGTATAGCCTGATTAAAAGGAAGTTCACACGGAAAAATGTGTTACTGTACTGATGCAMAAAAAAAAAATAAA
AAAATAGGGATAACAGGGTAATAGTAACAGCTATCATCTACCTGAAGTCAATAAAATCTGAACCAGAAATTTCAAGTGA
CCTACAATAACATTTCGCCAGCGAACTTAAAGAAATAAACAGTAAAAATGTTGAGACTCATGCTTCTGTTGGTCTGTGT
GATGATCCTTGTCCTCAATGTCGTCATCTCACAACCTGTAGGGATGATGCCCCAACAACAAGATCGGAAGAGCGTCGTG
TAGGGAAAGAGTGTAG
>Contig346 28629 reads, 766 bases
ATAATACGGTCTTATCAAGTGATTAGTTAGGATCTCGTCCAGCTGAAATGAATTTTATGTCAACAAACTAATTACCTTA
TCATTCAAGCGTCAGCTTATTGCTAGTTTATCATGAGAAAAAGTACAGTAATCAGCTTCTAAATACATGTACTCTCCCC
CGAAGCAATAAATTAACAATGTGAGTCACGAACTATTACTCGTCTCACACAAGGGAAACTACTGATGACAAGGCTTCGA
CACTTACGTCCGAGTTAGACACATCGCCCGAGTTATTTCTAAACGTCATTTGCCGAGACAACTATGGAGTACTACAAGA
TAGCGGCTGTGTTCATTCTGGTCGTTCACGTCACCAGCGTCGAGTCCACCAGTTGTACCCTGGGGTCTGACTGTTCCAC
TGCTGAATGCTGCGTGCAGGACCCGACCACCAAACTCGGCGTGTGCCGTCGAATGGGTGACGTGGCGGCCTACTGCTAC
ACCAAACAGCCGTACGCCTGGAGCAGACCCGAGAAGATGGTCACAGAGTTTGACCTTTGCCCCTGCGACACTGGCTACT
TTTGTGGGCCCATCGGCAAGGATAGTGCCACATACGGACCGATGGGAATTTGTTCCTTCGGGTAGTCTTAGATGTGTGT
TTGCAGTTCAACCAGCAGCTTCCCTTGATTTTGTCATTACACCCCTATAGCAACTACAGCAGATGTGTTGCAATAATTA
AAGGGCAGTCAGCTATCAAAAAAAAAAAAAAAAATAGGGATAACAGGGARATAAG
>Contig347 238 reads, 160 bases
AAAAAAAAAAAAAAAATAGGGATAACAGGGTAATATTCACACCTTGCCTAAGCTTAAGATTTGTGCTCTTCGTATCACA
GAGCGTGCAAGAGGCCGCATCTTGAAAGCAGGTGGTGAGATCCTGACATTTSGGAAGAGCGTCGTGTAGGGAAAGAGTG
TA
>Contig348 10242 reads, 645 bases
TACACGACGCTCTTCCRAAAAAAAAAAAATAGGGATAACAGGGTAATCTGTTCCTCTGCCAGACTTTGACACTCATCGT
CATTTAGGACTCCGAGATTAAAGGCAAAGCCTCAATCATACAAGATGGCCGCAGTGTTCGTCGGGAAATGGAAACTTGG
CAAAGTTGAGGGTGCTGAGGAGTATCTAACTGCAGTTGGTCAGGCCGAGGCCATCAAAGACATCAGCAACATCAAAGAT
GTGGACATCGCCCTCGACGGCAACACCTTCACGTCCGTGGTCAACATAGAGGGCAAGGAGCCTCGCAAAGACACGTCGG
TGCTGGGTGAGACGACGGAGACAGAAGGTCCTGGAGGCATCAAGATTCAGGTCAAGTCTTACATGGAGGGTGACCGGTT
CATCCAGGAGGGCTCTGCCGGCGGCGTGGACTGGAAGGTGGTCCGCTACATCAAAGACGGCGCAATCGTCACGGAAATG
ACCGCCAGCGGTAAAACAATGACCTTCACACTGGTCAAAGCCTAACCTTACAGCCAATATTATTTCACTAAGCATTTGT
TTAACACGTGATATAATCACAATGCAATATATTTATTTCCAATAAAGTACACCTTTTATATACAAAAAAAAAAAAAAAA
AAAAATAGGGACC
>Contig349 9404 reads, 882 bases
TACACTCTTTCCCTACACGACGCTCTTCCGATCTACCAAGTCGACATTGTCCATTCTAGGTTTTTTTCTATTAATCAAA
AGGAGGCGAAAAAAATAAATTATTAAACTACCGAAGGCTACAGAACTTTTAAAACAACAACTTATAATGTCACCCTCAG
GAATGCGGAAATTTAATTTAAAAAAACGAAAAGAATTGTCACTCCTTCTTTTTTAGGCTTGCTCCTCCCAGAGCGAGTA
ACAAAATCTTAAACAACAAAATTTTGTAATTTTTTGTAAAATGAAGAAAAAAAATTATAAAGTTAACGATTTTTTTGTT
CTATATTTGAATAATATTGTTCTATGCGCGTGCGATTGTGGTCATAAGTCATTTTGTGTATGGTGATCGGTCATTGATA
GTGTGTTGCCAGTCGAAGTGTCTCAAAGTTTATCTGCTCTTAACACCTGCAGCTAAGAACATCGCGTCAACAAATGAAT
GTTCTAGTTAACAAAAGTCTGGTCCCGCAGTGAAAAACAACATATTTTTTATACCATCTTCCAACATGCTCTTGATAAC
ATCCAACAATATCAACTCTACAACATTGGTCCCTTCGCTTTGATGCACTGGCTGGACGCAGACACGGTGACGTCATTCG
TATGCTTGTGACGATGACGCGCACCAACTTTTTTTTTGTACGGAACCCTCCAACCTAGGCGTTGCCTTGGAGACGCCTC
GGCGTCCCTCCTCGGCGGCGGCCATTTACGTGAACGAATGCGTGGAGCTTTAGCTTACTGTTCTGGTTTCTGTACCCGC
AACTCAACTGTAGACCTTCGTGAGGCCTGAATAAATCCTGGTTAATTCAGAAAAAAAAAAAAAAAGAGSGTCGTGTAGG
GAAAGAGTGTAGA
>Contig350 6295 reads, 887 bases
ATAAAAGGTTTTAATTACATAGATTGAAAATATAAGTATGAACAAATGAGAACAAGAGCCTATTACAATTTAGTTAATC
TATTTTATTTATCAGAATTGAAATTATGTCTCTGCTTTAAATAAAGATACATACGCAAAATATTAAATGACCGTCTAGG
CTGACTCCAAAAAATTTAATGAATGATTGACTTGCTTTTAAGAATCATGGAGAAGTAAAATTTGAAATGTTTTTTAACG
CCGAAACGAATTAGTATACGCAAGCTTGATGAACCACCTTAACTACTAAATAACTGTAGATACATCAGAGAACAATGCT
GATATTTGTAAAATAAATTGTACTTTCAAACAAAAAAGAAACTAAAGTCTAACAACAATAAAATCAAATGTTTTAAAAC
AAAATTGATACTCTTCTTACTCAAAACATTTATTATCAATTTTGTTTTAAACTAAAGAAATCACGCGTATTAACAAACG
TTTTTTTGTTAAGGCAACACACACAGCACATTCTCCGTTGTATTTTTAAGGTCTTCTTGTAAATCGATTTCTTATGCCT
TGTCCACGGCCTCTGCCCTGTTCTGTAGTAGATGGTGTTTGGACTTGCTGAACTTGCTCAGTCACGTTAAAGGGTTGTC
CATCACCGAAAAAGGCTGGTCCCGGGGCAGGGGCGGAGCCTTGTTGTGGTTCTGATGAGGATGAACTTTGTGCCGGACG
GACAGGCCCCCTCTGACGTCCACGCTGACACGAGGCGTAGCAGGCCAGACTTAAAACAGTGAAGATGATGAGTAGCTTC
ATGCCTGGGAAGTGGATGTCACTGGACAAGTTGGGTGTAAACTGATATTACCCTGTTATCCCTATTTTTTTTTTTGGAA
GAGCGGTTCAGCAGGAAT
>Contig351 11984 reads, 606 bases
ATGAAAGTTACCAATGTCTTGCTCTGAGTTGGCGTTTCACTGCTTTGACAGGCATGTTGGTTGGCGTGGATCAAAAAGA
TTACCCTGTTATCCCTATTTTTTTTTTTTTTTTTTCAGATGGGGACATCCATTTATTCCTTATGAACAATTATTTGTTT
GATTCATGGACATCAATTTTTGTAGACACACCTCAACCCGCAGCAAGTTTTCTGACAAGACCAATGCCACGATTTGTTT
TTCCACTGGCAGAATAAATCCCTGGTACATTCAAAATGGTAGCTAGTGCAGTGACATCCGTCTGTCGGAAAGTCCCATC
TTTTTAAGACTGACAGAGACAAAGCTTGCACTGAGGGCGTTGATGTGTCTCCCAGCTGTTCCTGGAGGTTGCTGCTCAG
ATACGGCAAGGGCGGTGATCCAACAACTGAGACGATTCCATAGAAGAGGAGTGAGAACCAAACAAGATGGCGTGACGTC
ATTGATGGGTCTAATCCAAAGGCAATGCGATGAGGAGTTAAATTATTATAGTGCTGCTCGTTTTAAAGACTCCTGCAAA
TATTATTACCCTGTTATCCCTATTTTTTTTTTTTTTTTTTGGCTATGAATTTT
>Contig352 11 reads, 197 bases
TACACGACGCTCTTCCGATCTCCTCTCTCGATGAGTGATGGTGCCAACACGACCCAAATTGTGCCCACCGGTGATCATG
ACAAGATTACCTGTATCAAACTTGATGAACTCTTTCATCTTTCCTGAAGCAATGTCAACCATAATGGTGTCATTAACTT
TGACCAATGTATCTGGGTAACGAATAGTCCTGATTACCC
>Contig353 157 reads, 223 bases
TGCTGANCCGCTCTTCCGATCTAGACGATGTCCCAGCTGTGGGTGCTGCAACCCCTATTGCCACTAAAGATTCCAGTGC
CCCTATGGACATTTATGAAGCCCTGCAAGAGGTTCTCAAGACGGCCCTTATTCATGATGGATTATGCCGTGGTGTGAAA
GAAGTCACTAAAGCTCTCGATAAGCGTCAAGCTCATTTATGTGTTTTGGCAAGATCGGAAGAGCG
>Contig354 9395 reads, 1020 bases
AAAAAAATAGGGATAACANGGTAATACTTTCCTGACGATTTTGGGTAATGTGAGTGACTTGAAGTCAGAATATACTGTT
AGTCTTTTTTAGGAGTCATAAGAAAGTGACTGGGGTTATTCGTTTGAACACCGAAAACCAATTCTGCCCGCTGCAATGA
AGACCATAGTTACCTTGACAGGATTTTTAGCTGTTCTCGTCTCGGCTCGAGAGTCACCGCCAGCCGCTGTCCTCTGTCC
TAAAATGGAATGTCCTCAGGTGGACTGCCCCGGTGGCTTCACCGTTGTCCAGGACAGCAACAAATGCTACTCCTGCAAA
TGTAAGCCCTACTGCCCAAAACTCTCATGTCCAGCAGCAGACAACTGCCCCAACGGTCGCGCCAATGACCCGAACAACT
GCCCAACTTGTGACTGCAAGCCCGAATGTCACAAGCTCAAATGTGGCAACAAGTGTCTAGCCGGATACCAGAACGACAC
CAACGATTGCCCAACCTGCACGTGCAATCCTTACGAGTGCCCGGATGTAATGTGCCCCAAGAACTGCACCGGAGTTTAC
GAGATTGACCAATGGAACTGCCAGACGTGTCGATGCAAACCGGTCGACTGCCCGACAATCAAGTGTTTCAACGGGTGCA
AGGTGAGTTCTTCCAAAAATGAACTCGGCTGTCCATTCTGCGAATGCCCGCCTCCGTGCCCAGCTTGCTCAAGACTGTG
CGCAGATAAAAAGAAATTCGCAACTCTTATTAAGGATTGCAACTGCGTTTGCAGGAATTGATCTCAAACTTTATGTAAT
TTTGGACAGTGCCACCACTGACCACTACGGGAGAGTTTTAAAGAAGAAATAAAAATTTACACAAATTTTGAGAAACCAG
AAAAAAAAAAAAAAAATAGGGATAACAGGGTAATATTCCTGAGCATCTTAACTTTATTTCGATTGCTGGAACTCAAGGC
ACATAAAAATGAACTGTGCATTGGTACTTCTCATCTGCCTTCCGATCATCACACTTGGTGCACCCGACTGGC
>Contig355 31566 reads, 908 bases
CGTATCTTGTACAAAAAGACCTTCGCTCCTCTACTCCCCGGCCAGAAGAGAAAAACTCCCAACTGGAATGCTGGAAAAC
CCGTCGAAGTCAAAAAGTGATAGCATTATTACCAACCTATTACCCAAAAAAAAAAAAAAAAAATAGGGATAACAGGGTA
ATATTCATTCTGAAGTCGATCCTGTTATATTAAAAATTCTGATTGTGCTCACAGGAAGTAATAAAAGGACAAACATGTC
TTTCCTCTACGCCATCTTTATCCTGCTCCCGGCCTTGACCTTTGCCCAAAGCACAATTAACCTTCAACCCTACAACCTT
ACGGCCACGGCGCTCTTCCTCAACGCAGACAAAAACGTCAACGGAGAAATCGACAGGAGTGAGATTGACGAGAGCTTTA
GGGGGTATGACGCCAACGGAAACGGCCGAGTGAGCCGACAGGAGTACACCAGCTACGTCGACGCCCACAACCCCGCCCT
CCACCCCCTCTCCCACGGCCTCTACGACATCTACGACGTGGACAACGATGACCAGCTTGACCACCACGACTTTGACAAC
TTCTTCGCCCTGATGGACAGCGATTCCAACGGGTTGGTCAGCCACTTCGAGTGGGTCCGATACTGGACCATCTTATTGA
CTGACCTGGAGCATCTCCACACCAAGAAATAAGCAGACCACGCACGCTACCCGCCATGTCATTTAAACTACAACATCTG
GACTAACACCAGCCAGACGGACATTGCTGGACATTGCCGGACATTCCTGGACATTATTGTACAATGGAAAGAAACTTAC
CGATGTGATTTTTGAGATCTAATATTAAAACACTTCAGCGACAAAAAAAAAAAAAAAAAATAGGGATAACAGGGGTATG
TACAGATAATTAAATTTAACTATGTTTTTTTAGATCGGA
>Contig356 10288 reads, 694 bases
AAAAAAATAGGGAYAACAGGGTAACGGCAGTCATGTTTTCTTCAGTGTTGGCACTTGCATTACTCCCCCTGGTTTGGGG
AGCACCAGATCCCACCAAAGTCTGTGTACCAGATGTGTTTCAAGTCTTCTCATACAACTTAGTAACAGATGTAACCTCA
GAGATTGCTATTGATTTTAAGCAAAAACTGCTGACCAGTGCCTCAGCCAATCTGACTGTAGTACAAGATTTGGACAAGC
TCAAGTCCTACACTGTTGACGCCAGTGGTAATTGCCAGTCGGCCACACTTCAACCAGAAGAAGTCTATCCCCAGTGCTT
GCCAGCGACAGCCACTTATGTCGGAGAGATCTTCATCGGATTTGGTCCGAACCGTGTGCCAGCCGAGGGCTGGGAGTTC
CCGTACAATGGCGGGACTGTGAGGGCGGCTTTTAGCAATGAGCCTGGGGAGCCTCGTTACGCCCTCTTGGCCAAGTTTA
TTAGTGCACAAGGAGTTGTTGTGACAACGTTCTCTTTTGACCCAAGCCAGAACATCACCTTACCCAACGCCTTCAAGAT
CCCTGACCCCTGTCCACCTGCTACCGTGGGTTAGATACAACTTAATTAACAGCACGCAGTTTATTTTACTTTGGTCTGT
TGTTATTCCCACTCACGTTGATATAATCTTTGAATAAATATATTTTATCGCTCAAAAAAAAA
>Contig357 188 reads, 456 bases
AATATCTATGTACATTTTGTCATGTAACAATCATTTAAAAAAAAAAAAAAAAAATAGGGATAACAGGGTAATATTTTCA
CCCCTCCATTCACGAAGTCAACTGGTCTTTACCTACACACGGATATTAAAACTTGACACCATGGCGATGAATCTTTACT
TTGTGGTTTTGCTCATGTTGGTAGCAATGACGTCCGCCAATGATTGTAGCTCTGGGTTAACCAAATGCCAGAACGACTT
AGTCAGCAATGCACTCAAGCACCCCGACGACAAGGATCTTCTCTGCAAGGATTTGCGACGAAAATGAAGTTCATTATTC
TACTTGTATGTGTAGCCATCTTGTGTTTGTACCAGGTGCCGCCATACAATGTATTCCGAGTGGAATAATGTGCTTAGTC
GACCCATGCGCATTAACTCTATGCGCACCAGACTACGTCTGCACGAGAGATCGGAAGAGCG
>Contig358 5486 reads, 852 bases
CGACTTACTATAGGCTAGGGATAAAAAAAAAAAAAAAATAGGGATAACAGGGTAATAAAAAAACACACTACACTAGTAG
CATTGAGGCACACAGTTCTATAACTGAGCTCTTCAGTATCTCAACGTATACTCCTGCTTTATGATGGCATTCTCAATTC
TTCCATTTCTGGTGATATTCCTGACTTACATCGAAACTCTCAATGCAGAGCATGGCTGCGCCACAACAGGAGCGGTGTG
CTATGATACCAAGCGGTGTTGTAACCAAAATGAAACGTGTTTTAAACTAAAAAATGAGTTAAGACCAATAAAAACCTTC
TGCAAGAATGTTAAAAACTTCAATCACTTCGATGAAAGGATCACTTTACGAGAGAGCATGCCATGTGATGACAGTGTTC
ATTGCCTTCTCGGCTGTTGCACCCTGGCTCCGTACAATGTTAACCAACCAAATAGAAAGCGCTGTAAACGGCCTCCACG
TGATGATGAACCATTCTATGATTGTTTCAGTACAAGACTGTAACGCTTATGACTCGACTGGAAACAGTAGCCAGACATA
CATGTCTTCACAGCTGAAAAATATACGCAAATTTGTGATGAGCATTTAAATTATTTTTAATTGTTGATTGATATTTGAA
CTTAAAATTTAAGTAAAGTGTTTTAATTGCAAACATAATTAGACTCAAAAATATATTATTTTCTTGTGAAAATGTTAAC
AATTAAACATTCAAAGTAATATAGCATAATTTAAGATAATTAGTTTTTTTGTTTTTTTATAACTAGACAAACGTAACAA
GTTTAATATTTTTTTAAAGNGNAACANNNTGCAAATAAAATATTTCATATGGCAAAAAAAAA
>Contig359 6833 reads, 1427 bases
AAAAAAAAAAATAGGGATAACAGGGTAATATATGTTGACCAGAGAGTTCAGGGTCACTAGTCTTATCTAGAAGATACAA
AGTAGAGTACACTCATAGAAACATTCTGAATTTTTAAAAAAGTCTTGAAAAACTTATTTACTTGTTGGTTTTGTTTCGG
TTTTCTTCGTTACGAAGTTAGTCGATTTAACAGCTGTGAAGAAAACTTGCGGTGAACACGCCACAAAAAGACATCACCT
TTCAGCATGAAGTTTTTAATTCTTTGCGTTGTCATTTCATTTCTTACAGTCATAACTCTAACTGACGGTAAAGCCATCG
ATGATGTAAGTGGACTGGACAGGTCAGTGAGGGCGGCCTGTGCTCACCCAGCGTTGTGTTTCATTGACCCTTGCTTCAG
CTCACCATGCCCGGATACTTGCATCAGAGACTGTGTGTGTGGCTACACGTGTCCTTGAGAGAACTTCCCTGCTTGAAAG
AAGACGCTACGATCCTAATCTGTCTTTGTAATAAACGTTAAACCAAACCAAAAAAAAAAAAAAAAAATAGGGAAAAGCC
ACTAAGCTTCAGCTATTGACGACCGTACCGCAAACCGACACTGGTGCGCGAGATGAGTATTCTAAGGCGCTTGAGAGAA
CTCTGGAGAAGGAACTCGGCAAATTGACACCGTAGAGAGACAGAAAGCTCTGGGGAGAATCAGCTACTACGGCTTTTCT
AACTATGGTCCAAAAAGATTGCAGGAGTTCTTAGAAGCTGGAGGAAAACCTGTCGTAAATCAGGTTGGATACAATCTGT
TGTGGAGATCTCCCGAGTACGACCTTATCCCAGCATGCACCAAGGCTGGAGTTAGTGTACTTGCCTACTCACCTCTACA
GCAAGGTTTACTTACTGGCAAATATGAAAAATTGTCTGAAGTGCCAGAAGGACGAAGGAGAGGAAAGCTTTTTAGCAAA
GATTCAACTCCTTTAGCTAGGCATGGTCAAGATGGTGCAGAAGAGGAAGTTGACCAGGCCCTGAAAAGGATTAGTGAAA
TCTGCAAGGATGCTGGTGTACAAATGTCCAAAGCAGCTTTAGCATGGATCTTACAACAAGATGGTGTTAAGGTGGTCAT
TGCTGGGGCAAGTTCTCCAGACCAGGTGGTGCAGAACAGTGAAATAATCAAACTAAACAATGATGTTCTACGTCAGCTA
ACTGAGGCGACAGAAGATGTCAAGAAAAAGATTGGGAACAATCTTGACCAATGGTCAGCAGTAGACCGATGTCAATAAC
TGCTGTTAGAAATTTGCTTCTAATAATTATAACTTGTTAGTTGAAAATTTGGTTATGATGCTTTGGATAGGAGGATTTA
TAATTGCATTTATATTTGGACACTGTCAATCTTTAGTCCNCANTGNTCANTGATATNTGGACACTGTCAATCTTTAGTC
CCCAA
>Contig360 5146 reads, 581 bases
CTTAAATTTAAAAAAAAAAAAAATAGGGATAACAGGGTAATCTTCTTTTTTGTGTAAAGTCTCAACAGAGAAACAAACA
AGATGGCAGATGATGATCTACAGGAAAAGAAGAAGAAGAGGACTTTCCGCAAGTTCACTTACAGAGGAGTGGATTTAGA
CCAGCTGTTGGATATGTCAATGGACCAACTTGCGGACTTGTTCAACTGTAGACAGCGCCGACGCCTGAATAGAGGATTG
AAACGCAAACCCCTGGCTCTTATAAAGCGTTTGAGGAAGGCAAAGAAGGAAGCAGGCCCTTTGGAAAAACCAGAGGTTG
TAAAAACACATCTTCGTGACATGATCATTGTACCTGAGATGATTGGTAGCATTGTTGGTGTGTACAACGGCAAAACTTT
CAATCAAGTTGAAATAAAGCCTGAAATGGTTGGTCACTATTTGGGAGAGTTTTCAATTACATACAAGCCTGTAAAACAT
GGTCGTCCTGGTATTGGTGCCACCCACTCCTCCAGATTTATTCCATTGAAGTAACATCCGGAATAAATGTTATGAGATT
GTCAAAAAAAAAAAAGCGGTTCAGCAGG
>Contig361 9657 reads, 458 bases
AAAAAAAAAAAAAAATAGGGATAACAGGGTAATATTATGACCCTTGTCTCACCGTCTCTGTCACCGTAGAGAACGCAAC
ATAAACATGTCTATCCTCTACGCAATCTTCTTTTTGGTCCCAGTCTTGACCTTAGTTCAAGGACAGGTTAGCCTGCAGC
CTTACAACCTGACGGCGACCGCCATGTTTTTGAACACAGACATAGACGTGAATGGCAACATCGACAGAAACGAGATTGA
TCTTAGTTTTAGACAATACGACATCAACCACAACAACAGAGTCAGCCGACAGGAGTACACCAGCTACGTCGACTCACAC
ATTCCATCTCTACACCCGCTCTCTCACGGCCTCTACGACATCTATGACGTAGACAGCGATGACCAGCTTGACCACCACG
ACTTCGACAACTTCTTCGCCCTGATGGACGGCGATGGCAACGGGATGGTCAGCCACTTCGAAT
>Contig362 7563 reads, 895 bases
CTTCCGATCTAAAAAAAAATAGGGATAACAGGGTAATAATACCACAATATCTTGAGTTCAGTAACCTACTGAAAATGTC
AGCTAGTATAGTTTACGTGTTGGTAGTTTTGATATCGTCTGCTCTGTGCCAGGACCCTGAACTGGTCTGTCAGCCTGCG
GTCTACCAGGCAAACTACACCAATCTTTTGACAGGCGACGCTGGCTACATTGCTGTGGACTATAACAAAGAACTTCTCA
GTGAGATATCAACAACGACTGGTGTCCGGTTAGTGCTGGACTTCAAAAATCTGAGAACACACGAGATTGTGTCCAATGT
AAGCTGTCGGACAAGCAAACTTCAGCCGTGTAAGATACAGACCAAATGTCTACCACCTTATGCCAAGCTGGTCACTAAC
CTCTCTGGTTTCCTTGGCAACAACGTGGTGACCAATGGTGGGATTTATTTCCAGACCTGGGAGATTCCCACCGAGTTTG
ACGTCATCTTCAGGTCATCGTTCTCTGTCCAGTCTGGTCAGCCATTCTGGCCAACAATGCGTCAAGAATTAGGTTACCG
TGGCACCAACAGCATCTATCTGTTCACCAACCCCAAGACAGTCATAGCAGACTTGAAGGCTTTTGACATCCCCCTAGCG
TGTGCTGGACTTTTTAATTTGTCCTCTGTATTAACAAAGTAATGGGAGTTTTATGTACTACAGATATAACCCTTGACCG
GCATGTGATCTATGACAAGCAGACGTCCAGATATCATGGCGACTGCTTTTAGAACATTACATTTAAGCCACGTCTTTAA
TAGACGCCCGTGATATACAACAACGTTATTGTAATTATTATTCCACTGTCTATGATGTTAAGCCCCGAGMGATCGGAAG
AGCGTCGTGTAGGGAAAGAGTGTAGA
>Contig363 9742 reads, 947 bases
TTTTTTTTTTTTTTCGCCCATGCATACAGTTTACTCATTATAATATTTTTGTTGTCAATTTAGAAGGTCATTTTCAAAA
AGGGTAACATAAACAAGTTCAATGTCATAAAAATGACTAGTCAAGATAGTATCACATATAAAACAAGCTAATTTTTCCG
ATAACGATAGATTTCAGGTTTCTTTCTTTCTACGGGCAGAGACTCTGGTTGGTCAATGTGGACTCATCTTCATGGCACC
AACACGTGGACGCATGTGGTCACTAGTGACTAGTACTTGAAGCCACTGTCATGAAGCTTCTGGAACACGAACTGGACCT
CATGCCATGACCTATCTGACATTCCCATGGCCAGCAAAGGTCTCTCGTCTCCTTCTAACGCCCCCTCAAACGCCCTCCT
TAAGAGCTCCACATTCTCATCAGTTAGACCGAGCTGTTCCCTTAGATCGTTCATGTCATTGGCCGCTATTAAAACGTGA
GCAATCATATTGGGGTCAGCGCCGTTAAAAAGTTTGGGAACCATCCATTTTCTTTCATTCTCAATAAACTCGATCAAGT
CCTCAATGGGTGGTCTGGCCGCTGCATTACAAACTAGAGGTTCCTCGTCAAAGCCATCCTCACAGTCCACAATCCCGTC
ACAAACAGATTTCAGTGGTATACACTTGGTTGTCCGACACAGGAACGGCTTGGAGGAATCACATGGGTTGCCTTGGCAC
ATGTCGTTACGTTTTGGTGTGATGAAGTTTGACCTGCGGAGTCCTGCGAGGCGTGCAAAATCTATTTTTAGTCCATGTG
CGCATGTGATGATTATGGCGAGTAGGGTCACTGTTTCAAGAGTCACTCGGGGAATCATCCCTATGTTTTTGGAAATTTG
GAGGCAGAAATAGAGGATAGACTATCTTGATGGTATTGAAAGGTAAATTATTACTTACCCTRTTAYCCTTGTTATCCC
>Contig364 6933 reads, 857 bases
AAAAAAAAAAAAAAAATAGGGATAACAGGGTAATCTTGTTAGAGCAAACCTGTGTTGTAGCAGCTCCATAGGATTAGCA
GAAGGCGCCATGGTTACTTCGCTTTTCGCATCTTTGGTGGTGGCCTGCTGTGTGATAAGTTCAATAAGTGCACAAGATG
TCGTGTGTCAAGGTCACTCCGAAGGTCTGTTCCCTAACCCGTTTGACTGTGGTGGCTACTACCAATGTGCTAATGGAAT
AAGTCAGCCTTTCGTCAGGAAGTGTGCACCAGGGTCCCACTTCGACCAGAACCTGCGCCAATGCCTTGCCATCCCCGAC
GTTCATTGTAATGACCGGCCAGTGGTGGACACACTGCAGCAGCCAACAAGGCGTGTTGCACCAACGAACTTCCAGTCCA
ATGTTTTACTCAGCAGGCCAAACGTTCAGTCCAATATTCCAGTCAGGCCCGCCCTCGTCACTCCAAACTCGGCAAACTC
CGTCACTCTCCGTTTGTCTAGTAGATCGGGTGGCCCGGCACTTAGAACAGACCAGTGCTCTGAAATAGGACGGCAGTTG
AGTCGCCAGCTGCGTACGCTGGTGGGCACCTACGACCTGTCCTGTACAGCTACCTCACCGTGCCAACAAAACCTCCCCA
CTTTCCGGGTTGACTGCCAACCACTCGCAGGTTGAGTGCCTCTTGGAGTTGGCCCACACGAGACCGACACGTGAGCAAG
ACACGTGACCCTCGACCACACCCTCACCAAGTGATCACATGACCAGAGTGACTCTTGCACATATGATCTGTGTAGCCAT
TTAGACAACCATCGTAATAAAACTCATTTCCCACAWTTMAAAAAAAAAAAAAAAATAGGGATAACAG
>Contig365 4963 reads, 730 bases
TTTATTGGTTACTAAAAAAAAAAAAAAAATAGGGATAACAGGGTAATACAAAGGCGCATTTTAACAGCGTCGTTTTCTG
GAATTCAAAGCCACCGACAAAAACAATCTTGACGGGACCAGTTGAATATAACGACCATTTGGAAAACAGGAACTCAAAG
GTATACCGCTGAAATATTAAAGATGTCCTCTTACGACGGCCCCACTAACATCCCATCCTTGACCCCAGGAGGTGGGACA
AGTGCATCCAACTCAGGTGGTGGGGACATATGCATCTCTCGCCCCATATCAGACAGAGTTACTGTTACTGCCTGTGTTG
ACCCCACGAAACCGGGACATACGACTGTGAAAGCCGGTTTCAACATCAAGTTCTAATGTTTGGAGAAGAGCACCGTTTA
ACATCGTCCATGCACGTCTTTGCCTATTGATGTTACTCAACAGTCTTTAAGAGTTACTTTGGCAACAATTGAGGAGGAA
ATGTTAACTAATGAATCTGATGTTTTAAAAAATTTGGTATGTTTTTCAAACATAGCCTTCATATTCTTATCATAGACAG
CATTTGTTGAACTTTAATATGAAAATTATGAATGTTCATATTGGACATTATTTTAAAACACTTACTGCACATATTTTAA
AAGTTTGTACTATATCTATGAAATTTAATTAGGCTAAAATACCATTGATATTGACTGCTGACTTATCACCTCTGTTTGA
AGCGACSACCGAGCGTCGT
>Contig366 9773 reads, 1392 bases
ATAGGCTAGGGATAACAGGGTAATAAAAAAAAAAAAAAAATAGGGATAACAGGGTAATCTTTCTTTTCCCACGTTTGCC
GTCAAGATGTCTCACAGGAAATTTTCAGCCCCGAGACATGGTTCTAAGGGATTTCTCCCTAAAAAGAGAAGTACACGTC
ACAGGGGTAAGGTAAAGGCTTTCCCCAAAGATGACAAAACTAAACCAGTGCATTTAACTGCCTTCATAGGCTACAAAGC
TGGCATGACCCACATTGTTCGAGAAGTTGACCGCCCAGGATCTAAAACCAACAAGAAAGAAGTTGTCGAGGCTGTTACT
ATTATTGAGGCACCACCAATGGTCTGTGTTGGTGTAGTAGGCTACATTGAGACCCCTACAGGCCTCCGCACGTTTAGAA
CTGTTTTTGCTGAACACCTTAGTGAAGAATGCAGACGCAGATTTTATAAAAACTGGTCAAGTTCTAAAAAGAAGGCATT
CACTCAGTATGCCAAGAAATGGGCTGATGCCACTGGCAAGAAGGACATTGATACTGATTTGAAGAAGATCAAGAAATAT
TGCAAAGTTGTTAGGATTCTGGCTCACACTCAGACTAAGTTGCTGCGCAAACGCCAAAAGAAGGCACATCTGATGGAAA
TTCAGCTGAATGGCGGTACTGTTGCCCAGAAAGTTGATTGGGCTATTGAACACTTTGAAAAACCCATTGATGTTTCTTC
AGTCTTTAATCAGGATGAACTGATTGATTGTATTGGTGTGACAAAGGGTCGTGGTGTTAAAGGTGTAACTTCTCGTTGG
CACACTAAGAAGCTACCCCGCAAAACCCACAAGGGTCTGAGAAAGGTTGCTTGTATTGGTGCATGGCATCCTAGCAGAG
TTCAATATTCAGTTGCAAGAGCCGGTCAGAAGGGTTATCATCACCGTACTGAGATCAACAAGAAGATTTATCGTATTGG
TGCTGGTATCCACACTAAGGATGGTAAAGTCATCAAGAACAATGCTGCAACTGAATTTGACCCAACTGAAAAGACTATC
ACACCACTTGGAGGTTTCCCTCATTATGGAGATGTCAGAAATGACTACCTTATGATTCGTGGTTGTGTAGTAGGCCCAC
GAAAGAGGGTCATTACCCTCAGAAAGTCTTTGATGACCAACTTCCGACGACGTCTCATGGAGAAGATTACACTGAAGTT
CATTGATACATCCAGCAAATGGGGTCATGGCCGCTTCCAGACTGCAGAAGAGAAGCGTACCTTCATGGGACCTCTTAAA
AAGGAGCTTTTGCTTAAGGATAAAGAGCCTGTCTCTGCTTAAATGCATGTTTAAAGATTTACTGGAGACGTTTTGGAAT
AAAGTTATAATTGATAATTGTAAAAAAAAAAAAAAAAAATAGGGATAAC
>Contig367 2862 reads, 491 bases
TTTTTWTAATTTTATGTTTTATTTGGAAATAGCCATGTATGGTTGTTTCTCAATCAATTATCGTAAATCCTTTTTTATG
GACAATAATAGAAGTTGCATAATGAAAATTGGTTAATACGGTTAATTACAGCCCGCTCTAATTCGGCCAGTGCATGTAC
AAGTCCAATTATCTAAGAATGGTGGACCATAGCGCTCAAAACGCTGACAATATAAATTGTCATGAGTGCAATTTCCCTT
TCGATACCCAAGACTCAAACACAGAAATGGGCATAGCAGATCTCTTTCAGGGTCAAATTGTTCACTGAACGTCATGCAT
CCCCAGTACGTAGGCCTGCACTCTCGAATGTTTTCAGGGTCATCCCAAGCCAACAGATGCACTACAGCACAGATTGTAA
TCAAAACAGTTGTCTTGAAATTTAAAATCATCTTCACAGCATAGATTGGGAATTTTATTACCCTGATCGGAAGAGCGTC
GTGTAGGGAAAGAGTGT
>Contig368 5249 reads, 942 bases
CTTATTACCCTGTTATCCCTATTTTTTTTTTTCTTTTTTWTCATTTTGGTTATTTTAATAGTTCAATTTGTCTAGACAG
TTTCAAGAACTGGGGGCTCATAGCCATCAACACGGTCAACTTTCTCACCACCTTCTGCAGTCTTAGTAGTGGTAGTACT
TGTTCCACCTTCCCCATGGAGCTCCATCAATCTACCAACATCAAATTTAGGCTTCTTGAGGACCTTTACTTTCTGAATG
AGAACATCATGCAGTGGGTAAATTCCTTGGCAACTCTTCTCTATATCCTTACCAATGCTGTCTGGAATAAGCTTGTTGA
CAACCTCTTTCATGTCATTGCTGGACACCTCACGGCTTACAATCTCAACCATCTTCTTGCGAATAGCCTTAACCTGGGC
ATGTTGGGCATAGCATGTCTTCTTGACTTGGTTGTTCCTCTTCTTTGTGAAGCCAATAACAAATACACGGAGTAAGTAT
CCATCAGTTGTCTTTACATCAACGTTGGCTTCAATCAAAGTCTGCCACTTCTTGACCATAGAGCACAGTTTATCTCTGG
TTAGAGACATGCCGTGGAAGTTAGTCAATACATTACGTCCTTGAATCTCCTCAGCGATAAGCTTAAATTTCCTAAAGGT
AACTTCATCATTTTGAAGATCAGCCAAGCTAACCTCAAAAACCCTGCCCTTCAAATTGTCACTTGCAATCTTTGTTCCT
TGAGAACGTGTAACAAGTGTCTTTCCAATTTGTCTCACAGAAAACATGGAGGGGGCCTTGACATCGTACCATTCCTTCT
TGGAAAAGGGATCAACCACCTTCTTTTTAGTTCCCTTTTTGCCTCCTTTGGTGAGGCGTTTATTTTTTCCGACAGCCAT
GATACTGATAAAAATGTAAAAGGATTACCCTGTTAGATCGGAAGAGCGTCGTGTAGGGAAAGAGTGTAGATCT
>Contig369 20583 reads, 808 bases
AGGGAAAACGCCTCAGAGACTTATCCCCCTGTTATCCCTATTTTTTTTTTTTTTTTTTTTAGTGAACCAAAATTACATT
TATTGTTGCTAAAAGCTTGTCAAAATCAACAATGTTAACGGTAAGATTTCTGGTATCTGGAACGAGCACCTGGACCTCC
AAATTTCTTGGGCTCGCAGCGACGTGGATCAGCAACTAGCAGAGACCTGTCGTACTGAATGAGAACATCCTTGATTTCT
TTCTTGGATGCTTCATCAACATATTTTTGGTAATATGCAACAATAGCCTTTGAAATTGCCTGTCTGATAGCGTAAATCT
GAGCAACATGACCTCCACCTTTCACACGCACACGAATATCTACTCCTGAAAATCTGTCCTTGCCAAGAAGCAGTACCGG
CTCTTGAAGCTTAACACGAAGGATTTCAGGCTCCATCTGGTCAAGTGGGCGGCCATTAACCTTGATAAGACCCTTCCCA
CGCTTGCAGTGGGCAACTGCTGTTGCAGTTTTCTTACGCCCAAATACTTGTACAGCTTGCAAAGGACCCTTAGCAGGCA
TCTTTCGATAGAGATCCAACAAGAGAAAAAAAAGATTACCCTGTTATCCCTATTTTTTTTTTTTTTTTTTAATTTGGAC
AATTTTTAACATTTATTGTTTAGTTTTGATAGGCAAATGATTTTACAAGTACCTCAAAGACCAGATGGAAAATTAAAAA
AAAAACACCTGACAAACTGATCTTGCTTACATTACATTATATTAAAATGCCATTAAATGATAAGATCGGAAGAGCGGTT
CAGCAGGAATGCCGAGAC
>Contig370 4042 reads, 552 bases
CCTGCTGAACCGCTCTTCCGATCTTTTTTGTTGATTTGAATGTTATTACACTACAATCGTGTTATTACACTACAATCGT
GTTATTACACTACAATCGTGTTATTACACTACAATCGTGTTATTATACTACACTCGTGTTATTACACTACAATGGTGGC
CTTGTTCGCCAATCCAATGTTGTCGTTGGCAGTAAGTCATTACACTTGCACATGTATTTTGTTCGCTCTCCCCGATAGA
TGTAAGTTCTGCACATTCTTCTGTTCAAAACACACAACCCCACTCGAAATCCCATGTCGCTACATATTGTTTGGCAGGG
TTTCCCAACTCTCTCGTCATTTACGGGGAATGCATTGCACTCCGTATAAGTTCGCCCACAAAAATTGATGTAGGACGGG
TCAGGCCAGTCACCATTGAGTCCCTCTACCGCTAGGATGGTGAACAAGAGAACTTTAGTCAGCATTAGCGTGTTGTTAG
GCAATGAGGCCTCAAGCTGTGGTACTTATCTGCCATTTGTTTGTTTGTTTTGAAAATAATGATAGGGAATTATTACCC
>Contig371 9244 reads, 1005 bases
GCTAGRGATAACAGGGTAATACAGGGACGAGAGCTTACAATAAACCACCAAGCCATTTAAGATGAAAACAGCCATCGTT
CTGTGTGTTCTCCTTGGAGCCGCCACTGCATTCTTGCTGGATACGAAACAATATAAATGGGACAATCTGAAAGTAACCT
GGGGCCCAAACCCACTGAGTTCAAATTACTTTGTGGGAATGCCAAGAACAGTAACTGATGCTGAACATAATGGCTTTAA
AAAGATTGGTGGTTGTGACACCACCGCCCACTGGCGAGGTCAACGCTACATAAAGAATGACGACTACTCTGTCGTCTTG
TTGTATGACGTCAATGGTTTCATCGCTGGAATCCAGACCACGGTTCCCAAAGATCAAGGGCGAAACTACCCCAAGCCTC
CCCTCGAGCCCCCATTTGTTTCTGATGGGAACCGTTGGGTTATTTCTGCTTACTTTGTAGATCCTTCCATCATCTGTAC
AAAAGGGCGAACAGCTCAAGAGTTTAACGCTGACGGAACTGGTACCAACCTTTACATACAGAACAGCACCTCACCTGAG
CATAGTGTGCTGATACCTCACAAGGAAACTGACATCCGGGGCACGAAATGGGTGGAAGGCAACTGTTTCTTTACTATGG
GCAAACACTACTGGTACAACTTGAGGGCTGACATGAACTGTGACACAATCTTCCCAGCATTCCTTTTGTACAACCACGG
AGAGTTGACGGCATTCGGCTGGGCCCTCGTCACCAACCTGACCTCAATCAGATATGAACACCCTTCTCACTCCTCCTAT
GGTATGTTCATGAAAACGGTCCCCACATGTCTGAATACAGCAGGAGTTCTTTCTACGATGCACATCTACCTCACCGGAA
ACTACGCTTTGGATACATGCTAGGTTCAAGGCCACCAAGGACAGATTACAACATCAGATAAGGGAGATAATTGTATTGC
AACTTTTCATTAAACTCATTAACCTCAAAAAAAAAAAAAAAAAATTCTCACTCCTCC
>Contig372 6922 reads, 806 bases
GGGTAATTAGGCTAGGGATAACAGGGTAATATACAGACTCTGGAGTTAGCTTCTATTGTTTCCATCTATTCTTACAATC
TCACATCAGCATTCACTAACAACAGTCGATAGGAACCATGAGAGTTTGTGTGGACCTGGTGCTGCTGGCTTTAGTGGTG
GCTGGAGTAACTTTAGTTACAATGTCTGCGGACCTAGGCTGCCCCACTGGTATCTCTGCCGGACAATACTTCACTCCAG
CTGGTACTTGTCAGAGCTGCAAATGTTTCAAAACTTCTACAGGTCTGTCCTACAGCTGTGATCAGTGCCCGACCACCCC
TTACTACTACGACAGCACCAAGTGCTACTCTTACTTCAACAACACCAGGCCTTTCAAAGACTGCTGCCAGCCTGTGGTC
AAGTGTAGAGGTCAGCAAGGGTTCAACGAGTCGATGATGACGAAAACAACATAAACCATCAGACCTGGACCTCAGTCAA
CAACCAGCGCCCCCCCCCTCACCGACCGCTTTGATGATGAAGATCTGCTGTCATGTCAAGACTGCGATACGTAAACTTG
AAATAAACATAAACCTCTGCGAGATGTTATTTGTCATTCATTATTTGAATAAACCCAGCACTGTGTTTGCTGTACACTC
GACTGAAAGAAGTGAATCAGTCAAACTGTGAGACACTCATTCACACACCTAGAATTAATTGTTTTTACCTCGCAACTTT
TCTTCCGTGTTCAAGGTTTTAAAAGAAAATAAAAAATTTTAAAAATGAAGAAATTACAGATCGGAAGAGCGGTTCAGCA
GGAATGCCGAGACCGA
>Contig373 7219 reads, 661 bases
AATTAAATAATCATTTGTTGNTCTTTGAAAAAAAAAAAAAAAAATAGGGATAACAGGGTAATCTTTCTTTTTTGGTCAG
GATAACATTCAGCTGGTCGCACAGAATGTTCGATGCTCAGTTGAATTCAGTGTTCCGCCTATGTGTACTGTGCAGTTGC
CTTCTATATTACGGTGTCAGCTCCGCCCCTGTCCAGCCCACGAACACAGTTAACAGTGAAAGTAAATTCGAGACAGTTA
CTTCCGGTCCCATGATTCATTATCCTATGAAGTTCGAGGTCAGGCTGACCTATGTGGACACCTCACCGTCAGACATAAA
CACCCTCGTCAAGTAGCCATGACGCCCACAGCGCGCCCCACCATGTGGACGGCCAGGAGACATCCCCGGTCGCCTGTCA
GTTTAAGAACACAGAGATCGCCCTCCCCATCACCTTCTCCCTGGAGATGCCGTCCTACGTCATGGTGGGTGGGCACAAG
TTCAACCTCAAGTTACAGATGCCTGTCATCAGTCAAGGGACGTAACTTGAAGCTACCGTCAGAAGTTGTCAAACCTGAT
GATTTATTCAGCGCTTCCTTGTAACCAATATTAAAATATTTGTCAAATTTTARATTGCGTCRCGACTTTYAGAAAATTT
ATCTACGTACTCTTTACACTCTAATTTCA
>Contig374 4154 reads, 757 bases
AATAAATGTGACTGTATGAAAATAAAATATAAAWAAGCGAAAAAAAAAAAAAAAAAAAATAGGGATAACAGGGTAATAT
GTTTCTCTTGTAGCTCGTTCATCACCCATCAGGCGCACTGGAGTCGTCAAACTGTGAACTGTTTTTCTTTCTGACTTGG
CCTATAAGCTTTAAAAATTACGTCCATAAAAAATAAAGAAGCTCAGTCCGAAGCTTCTGTTGAGGGCAGTAGCTCGACT
GTCTTCTTCAGCCAAAGTCCAGAGGCCGCTTGTGGAATAAGAAGGAGATTCAATTTTAACGCAGAACCGCCGTGGGATC
CCAGCTAGTATCTGTTGAAGCAGGCGTTTCCTTGGGCCAGATTGTTTGTACAACCCCGACTTGTTCATTTTAGTCTAGT
GACATTGTATTTGAAATATTTACCATGAAGCATAAGTATTCATCCATTGCATCTGTTGAGGTCATTGCTGACCCCATGC
CCTGCATGACTCAGCTGATTCAAGACAAGATTGAGCAATTTGAGAGCAGAGACTGTGAAGATGCATTCTGTGTGTGTGA
TGTTGGTGATGTTGTGAATAAGTTCAAGGCTTGGAAAGAGTTGCTCCCGAGAGTAGAGCCATTTTATGGTTTCAACTAA
ATGATTGGATTTTGCAGAAGGACCATTGAGTCTTGATGATTTTGTATATTTTAAACTTCATGCAATTCTTCTGGTGACT
GATTCAGATGATTAAAATCACTTGGACAAAAAAAAAAAAAAAATAG
>Contig375 5854 reads, 947 bases
GGGTAATGACCCCGGGGTAATACAGTTTAAGGTTGTCTGCAAAGGGAAACGCGTAAAAACAAAAATGTTGTCAACAACC
TCTAAAGTTTTAAAAAGATGTCTTGGAGCGTCAGTGATTCGTTTAAAGCATACTCTCCCAGATTTAAAATATGACTTCA
ATGCATTGGAACCCTACATCTCTGCTGATATCATGAAACTTCATTACGAAAAACACCATCAGACTTACATCAATAATCT
CAATGTTACTGAAGAAAAGCTAGCTGAAGCTGTTTCAAAAAAGGACATTACCTCCGTTATCAATCTTCAACCGGCACTT
AGGTTTAATGGTGGCGGGCACATTAATCACACCATATTCTGGCAGAACCTGAGCCCTAAAGGAGGCGGAGAGCCAACTG
GTGATCTCTTGCAGCAAATTAAAGAAGACTTCAACACTTTTGATCAGATGAAGAAAGAACTTGCAGCTGCTTCCATCGC
AGTTCAGGGATCAGGCTGGGGATGGTTAGGCTACAGCCCTATTAATGGGCGACTTAGGATTGCTACCTGTTCCAATCAG
GACCCATTGGAAGCCACAACAGGATTAATCCCTCTTTTTGGTATTGATGTTTGGGAGCACGCATACTATCTCCAGTACA
AGAACGTGAGAGCTGACTACGTCAATGCTATCTTTAACATTGCAAACTGGAGTGATGTCTCTGAAAGATTAGCCAAGGC
TCGATTGCGCTGAAACCAAAGAGATATTGTTTTTTAAAATTTAATTGGCTTGGTGAATCTCTCTAGCAGAAAAACAGAT
ATGATTGAAATTGAATATTTTCAAACATAACAATTATTCGTAAAATTATTAGAATTACATTGTAAGCAGAATTCTGCTG
TGTTGATTTTTTAAAATTATTGATTGAATAAATGTCTAGATGTTCGTCAAAAAAAAAAAAAAANAATAGGGATAACAG
>Contig376 5178 reads, 1333 bases
CAATTCTCCTCTTGTGGCTTGTGATCATCGCCTGTGTGCCGACCGTTTCAGGACGCAGGGGTAATCGTGACAAGTCGGC
TGAGACACGTCACACCAGTGCTCCCGTGACAGGGACGGAAGAAAATGAAAGTGGGGCTCGAGCACCTTTTTCAGGAGAT
CAAGGACCTAACTTAGGAGCACTAGAAGGCAACGAAACCCCCCCAAAAGGGTCTGAGCAATCTGATCCAAAAGGGTCTG
AGCAATCTGATCCAAAAGGGTCTGAGCAATCTAATGAATCTGAACAGGCAAATAAAAAAGAAGAGGATGACCTATGTAG
TTGTGTTGTAATTTTTGAAAACATTGCATTACTCGAAGACGCTGTTAAAGACCTTAGGGCGATGGTCTATGACCTGGAG
TCAAAGTTGACAGAACATGAAAACCAGCACAGACGGGCATCGTTAGTCGCGCGGAAGGAACCGCCCAAACCCCGCGGAA
AATGAGTGAAACGTCACTGGAAACACGGAACGTTATTTTCAAGGTTCGCCGTTTGCAGCACACTACAGCAGTTTGTGCA
CTTCTCCCGAGAACCACCAGGTCGTTGGACTGCCCGCAAACTTGTGTGACCTCAACAAATATATCGTCTGCTGGAAACG
TGAGGCGTTGTTTATAATGGACTGTCCAAACGCTTACCGATTTAACAATGCAACTGGTTGGTGTGATCTTAAAGAAAAT
GTCCCGCTACCAAGTGGATGCACAGAACAAGAAAAACCCAAAGCTCCAACTACTTGTGAAGAGAATGGTCCTGGATATA
TGGCACATCCTTCCACTTGCAAGAAGTACATCTGGTGTGTACAGGGTGGCTACAACTACACACTGCCTTGCCCCAAATT
GTCCTATTTCATTCCTCGTTTGGGGACATTTGTCTACGTCACTGAAGCTTTCAGAAGCCAAATGTTGGACTCTGAGTAC
GATGATTGTTCAAGGAAAGACTCTTACACTATTGATGAAATTGAAGGAAGAACCACAACACGCAGAGTTTAAAGCCGGA
ATTAGTACCTGAACACATAGCACATTTAGATAAATTTACAACCAAACATTAAAAATTATTTTATTGAAAGACAACAGCA
ACAAATTAGTCGTATCGTGTGAAAATGCAGTAAGTCTGTTAAAAACATCGTCTGTAAACAGATAAGATAAGATAAGATA
AAATAAAAACATCTCACCACGAAAATTTTCTCACATCAAAGCAACAAATTAGTCTAATCATGTCAACTTATCGCCAGTT
TGTGAAACCATCTCATTAATGATAATTTTCTAACATCGCAACAATAAAAAGAKCGGWWGAGCGTCGTGT
>Contig377 9007 reads, 901 bases
GGGGAATCAAACAAACAAACAAATCAATTGTTGTTATTTTACTCAACTTTAGTAATCTAATAGAATCGAGGAAAATGCC
AATGATTTTACAACTTTTATAAGAGTGCAATTTAAGTTGTTTTTTGTTTTCTTTTTTCTTCTCCAAATGTTATAATTTT
GTTGTTCAAAAATTCGTTAGTCTTAACGGGCAAGTTTGTTATAATCTCTCTCGCCCTAGAGTTTTATGTTGCCAGCGAT
ACAGTTGTCTGGGATGTCAAAATAAGATTCGTTGACTTTTGGCGAGTGGTTAAGGAACACTTGAGTTGATCCACCATCA
TGATCTGTCGTTTGGAGCAATAGAAATGAAGGGTTGCCGTCAGTTATAACTACTCGAGAGTTTCCCAGGTTTGGCCTTG
CAGTTTCGTAGATTGAAAATTTGGTATGGGCTTCGGTTAGTTCTCCTTTTGCCAGCAGCTTCGTGCCATCCTTTAAGCA
AGGTCCGTCTGGTGCGTACTCAGGATCGATCTCGGTGTATTCGCAATATTCTCCAATGATGTTATATGCAAGGTTTTTT
TCGTAATTGTACACAATCCGTGTGTGAATCGCCGATAACTGGAAAACAAAGCCGGCTAATTTTCGTTCGAAGTCCACAG
CCAGTGTTCCAAATGACTTGTGTTTGGTGTCGTAGAAGTCAGTCTGATATTGTGGGGTGAGGCAGGGTTTTTTCTGCCG
CTCCTCAGCCAAAACGATGGGCACAGCAAACACAAGAATGATAACAGACTTCATTTGGGGGTAGGGGCTGTCAAAATAA
AGCCTTGCCGTAACTCTCAGTGGAGGGGGTCCAGGTGTCGGGAAATACCTTTCAAGCTATCTTACTTGAGCGTGTGAGT
GGGCAAACGATATTACCCTGTTAGCGTCGTGT
>Contig378 6207 reads, 645 bases
TCCCTATTTTTTTTTTTTTTTTTTTTTGGTATTTATTTTTATTCAGTCTTCAACATCAGTTCAAAGTTCAACATACTCC
ATCACACAATCACGTCTCTTTAAAAAATATATATAAAGGCCCCCGTTGAAATTCGTTTACTTGTTGGGTAGCCAGAGTC
CACCTCGAATGGGCATCTCCGTGTAGATCTCGTCACAGTATTCCCTCATGTCCATCTCATTCTTGCAACATTCCTGGTA
AACTTGAACGAAACTTTCTGGGTGTCTTTTACTGCACTGATAGCATATCTGTGAAATCCGTTTGGTTGTGACACATTCG
GTACCTTCGGTCCCCATGAGTTCATACTGCCCATACCTTGCAGGGACTCTGTTTGCCATGACGACTGCCAAGTACGCCA
GGGACACGACCAAGAGATATCTGAGTGCTACGGAAGACACCATCTTTATTAGAGAAACTCGTTACGTCACTGAAGTCAG
GTGTGAGTGAGGCTGGAATCGGGTCTAAGGCTTCAGTCAAATCTAAGGCACACACAATGTTTCCTTCAGCTTCCTATCA
ACTGAGCTCTACTTGCCGTCAGTTTGCTCGCTTGTTCCCAGGATGAATTACCCTGTTATCCCTATTTTTTTTTTTTTTA
CAAGTGCTTTTTT
>Contig379 11 reads, 185 bases
TCCCTACACGACGCTCTTCCGATCTGTTGAGTTTAGGTAATAACAGGAGTGAGGTCCGTGGTACAGTGGCGAGGTATCA
TCCAGGTATTCAGTTAGTCAAACATTCTCATCATCATGAGTTGTCGCCAGAACATGCTGGGGTCGTACATCATTGGGCT
CTGTTGTTGGGGCATCATAAATGTCCA
>Contig380 7160 reads, 1910 bases
AGACGCGCTTGATATTGTTGAAGACCTCGTCGAGTGTATCAATCGCTCGTTCCACGTTGGTTTCCAGGACCTCGCGTGC
TTCCCTCTCCGTTAACTCTGCTTGCGTGGGCGAACTTGTTACAAGTAAACACAGAGAGCAGATGACGATGAATGCCAGA
AGAACAGCGGACTTCATTGTAGCAGGTCTGTTTGACGAGACTAGATTTGAAACGAGGTGCAGGGAGTCAGTGAGTTTTT
TTTTTTTTTTTTTGAAAAATATATTTCTGTTAAATTTTATTCGTGTTAAGGCAGGAAATAACAAGCTTGTTTTGTAAAA
ATTTCCAGTTGGAATTTAATAGTAACGTTTGCTGCAATATTCTTTTTCCATGTTTTTCTTGTTTGTTTAGCAACCAGCC
ACATTAGCTGTGTAGTCGCAGTTTTGAATTGCTTTGCTGAAAGCGGTGCCTGCTGCGCAGTTCTTGATGAATGTACTTC
CTCCTGCACATTCAACAAACTGGCTACAGCTGCCTGGAGCTTCGTGGATACCGTCACTGAGATGTTGGTCTTTGCAAAT
TGAAGCCAAGTTTCCTCCTCCATGGACAGGTGCTTGTGTCACCACGGGCGCTTGTGTGACAACTCCAACAGGTTTTTGA
GTTACAACTGGAGCAAACGTCACGCTCTGGCCCTGGGGTGCGGCACCACATTCGTCACTGATGGCATGGACCAATGGGA
AAGCTCCCTGACCACAAGATGTGCCGTGGAAGTCATCGAGGTCAAGTGCCCAGATCATGCTGCCCCCATAGCCATTGTC
CTTGATGTACCTCACCTTGTTTCTCAAACTTTGAGGATCATCGTAACCGATCCAGACGTTGCCCTTGACCAGGTAAGGA
ACGCCTTGATCAGCGATTTGGTACACAGTTGCGCCGCTTTTAATCAAATCACAGATTTCATAATAGGCCATGAACCCAG
CTTCTCTTGTGAACTGTCCGGCAGGTCCAGGGCTTGGGGCATTGTCACCAACCTCGTGTTTGTTGGGGTCAGACAATGT
GAACGTACGTCCGTATGTCGCCAAACCAATGTTCAGTTTATCCTTTGGTGCCCCCTTGGACACCCAGTACTTGGCCGCA
AAGTCAATATTCATGTTGACGTTAGCTCCCGTCTCCCCAGCGTGACCGTAGAGCGGAGAGTTGTGGCCAGTGTATGGAT
CCCAGCTTCCGTGGAAGTCGTAGGTCATCAAGTTGATCATGTCCAGCTTAGAGGCGATCTGTGCAATCTCATAGGCGGC
GTCAATGTTGTCCTTACCCGCAGCGACGGCAGCTGACAAGATGAGTTTAGGTTTGCCACTTGTGTGGTATTCCTGCTCG
AAGGCTGCGGCCAGTTCCTCAACTAAAAGGGTGAACCTGTGTTTATCTTCCGGTGGGCTTCCTCTAAGAGCAGGGTATT
CCCAATCCAAGTCAAGACCGTCAAAGTTGTGGTCACGCAAAAACTTAATCGACGTTTGAATGAATGCTTGGCGGGTGCC
AGCCGAGGCGACCACCTGGGTGAATGGTGCAGTGCCCAGGTTCCAGCCTCCTACGGCGATCAATGTCTTGAGCTGGGCA
TTGGTCTTCTTCAAGTCGGTAAACTTAGAGTATAGCCCCTTGGCCCAGTCGGTGTCCTCGTCATTCCACTCGAAGGCCG
CCAGTTGGTTGTTGGCCAGCTTGGCGAAGGAGTAGATGATGTGTGTACACAGGAAGGGGTCAATGTTCTCAGGCATGAA
TTTACCTGGCTCTGGGCGGTACTGTGACCAGTTGGTATGGTAACACACACGTCTTTGACATGACGCACCATAAGCACCT
TGGCCTACGCTTGCCAAAACAAATAAAGATAAAATGAAAATCATCTTTTCAAAACAGATCACGAAATATTACCCTGTTA
TCCCTATTTTTTTT
>Contig381 7787 reads, 1210 bases
GACGGCATACGAGATCGGTCTCGGCATTCCTGCTGAACCGCTCTTCCGATCTCATACAACGACGATCAGACTTCACTYG
ACCAGACAGGAAACAGGCGGCCAGCGTAATGAGAAGTACGGTATGCATCTTCCTGCATCAGTAAGTTTTCGGTACAACT
AATTTTTCCTGTTATCCCTATTTTTTTTTTTTTTTTTTTGTAAAGGCACAGAAAAATTTTACTGTTTACAAATATTTGT
TATTATTGTCACAATTTTAACACGTTTTTTTTAAGTTTTAGTCAGAAAGAGATCTTGCCAATTAAAGACACCACGTGAC
TCAGACTCATTCGTTAGCTGACAGACATTTTAGGCATTGGGCAGGCTGGGATCGAGGGGCACTTGGACCTTGCGACCTC
CTTCCAAAATATGACTGTTATCTATTCTCGGGACAGTATCTTCAAGAACGTGGCCGTTGGCGGCTGTCAACCTGATCCC
GAAAGCACCGTCAGGCATGGCATGGCCGTCGCTTAGCAACCAGTAGCCGTCACCACTGTGGTTCATAGTGACCCAAGCG
TTGCCCCTGTGAACTTGCACGCCTGTGATGGGGATCCTGGCGTTTCGAACCTGGAGTTTCAGGTAATACGGGTTGCTGC
CCTGGAAAGCGCTGGAAAGCGTACTGGATGGTCGTACTGTCGACTGGACACTGGACGGCGTGGATGGTGATGCCCCATC
GACCGTCTCCGTTGAGGGCAAAGTCCACGGACCCTTCGTGACACTCGGGGCAAAGATCTTTAACAAACACGATATGATC
TCCTGTGATTGGATTAGCTCCAAGGCCGTGACCTGAACCAGTTACCTTGAGACATATCCCACAAGTTAATGAATTCAAA
AACTGAGGTTTGTTAAGAGCCACCAATGCTGAGATCTTTCGATTGGTTGCCGCTGGTGGTAGGGGCGTGGCGTATTGGC
AGGTGCCGCCTGTTCCTTCACCATAGTATGTTCCATCACCGTTGTAATTCCTGCTGTACAAATTGAGAACGGCTTGGTT
CTTTACCCCAGGCTGGCCGTAAATGAAAGGGAGCAACGCCAAGAACACAATAGTAAGCGGCATCTTGAAAGCCATTGTT
GTTGAAACTGTAGCAGCTGTTACTCGCAACTTGTCTGTCCTTCAGTTAATGAAAGCCCTCGACAGGAAACGATTACCCT
GTTATCCCTAGCCTATAGTGAGTCG
>Contig382 3117 reads, 622 bases
TCTACACTCTTTCCCTACACGACGCTCTTCCGATCTCCTGACCCACTGACCTTCCCAGGACCACTGAATGTGCAGTTCT
CTGTCAACATCAAAACATTGGTCGACGCACCGATTAAGGGCCAGCTACTCTTGCAAAAGAAGGTTGGTGACAATTGGCT
CAAGATCCCGTGTGTGGGTATTGTGGGGTCGTGCACGTATGACGACATCTGTCAACTCCTGGCTTTGATCTCAGAGTGT
CCACCTCAGTTCATCACAGCTGGTGTGCCATGCCAGTGTCCATTTCAAGCGGGCTCCTACACTCTCCCCACGGCTGAGT
TTGACGTAGACATACCACTGTTTCCATCCGGGGACTACCACGCCGTCGCCAACCTCACCAACAACGCAGATTCGATCTC
ATGTGTTGAAATCTTCGCAACGTTTGCTTGAGAGAAGCTGATGTGCCAAGAGAAACTATTTATTCTATACACACTATAA
CCACAATTTTTTGTGTGTGTGCATACCAGTAAAATAACAAGTTTTATATTCTAAAAGTACTATAGGCACAATGTGTGTG
TCTATAAGTAAAATAACTTTTGTGTCTATAGTAGTCTATACTGAATGCAGTTGGAAATTGCTTCCCACR
>Contig383 394 reads, 313 bases
AACAGGGTAAAGGCTAGGGATAACAGGGTAATAATCAGTAAATGAATTATCCTCACAGCTTGGACCCACTGACGCAGCA
CAAAATTACGGACAATCACACGGTAATGCATTACTGTCGCTCCCAACGGACAATAATTAGCGGTTGACATCACGAAAAT
GACAGATTCCATCAGACAAAATTTGGTCTACTCCGTGTCAGCGATAGCTGGCATTGGGTTCGTTTCCTACATTGTCTAT
CGGTACAGATGTCGCGTTCCAAGGTGGGACAGGCCTATCAACCCGTCAATTAGGAAAGATGAAAAAGATCGGAAGA
>Contig384 8001 reads, 889 bases
TCCTGCTGAACCGCTCTTCCGATATACGACTCACTATAGGCTAGGGATAACAAAAAAAAAAAAAAAAAATAGGGATAAC
AGGGTAATACTGTTTGCCCTGACAGCTTAATACATCCCCTTTGAAGGAAACGGATCACGTCGACACATATTTTCTCTCC
ATATAGTGTACTGAAGACTTTAAGGATACGACATGGCGTTCAGTGGATTGATAACTCTGATCAGTTTTGTTTGTCTTGT
AGTCGTGGTGACTGCACATGGCGGTCGTTACAGGGATAGAAAAAAAAAAAATAGGGATAACAGGGTAATACTTCCCTGA
AACCCCGAGTAATGCTGAAAGCTCTGATTCTTGCCTTGTTCTTCTCCGCCGTTGCCGCGACTTACCATCGCTGGAACTT
CCAGGATACCTTCACCCTGTCCTCCGCTTGCCCCACCAGCGGCAACTCCTACACGTGTTCGTTGAAATTCCGTGGAAAT
GTCATCACCTCGATGATCAAGCACAACGCTCTTTCCACCACCGTCACCTACATGTTCGGCAACACTTTCATCTTCAACA
TTACCTCTGGAACCAACCAGGCCAACAACGGTTGCACCGAGAGTGGAACTGTGTACCTGATGGAGGGAGTCCCCACCAA
CACCCTCTACGCCTTTAACTTCAAGTCCGTCTGGTGCCAGCAGAACCCCCCCGCCTCTGTCTACGTTATCAACGGTGGC
CAGGGACCTTGGGCCTCTGCCACGGGTCAGCTCGCTCTCATCTGCAACCCTGCCACCGGCATCTGCCACAACACTGGCT
GGATTAACGACGCCAACCCCACCACCACCACCTCGAACGATCAGTAAAGGGATTAAGCTTGCTTTTTCAAAAAAAAAAA
AAAAAATAGGGATAACAGGG
>Contig385 8816 reads, 533 bases
CCAGCTTGACCACCATCACCCTGTTATCCCTATTTTTTTTTTTTTTTTTTTTAAGAGTAATAAAATAAGCTTTTAATGT
GTGATTAGGTAATCTCTATATGTTAAACTGTCAGTCCAGCACTTCGTGACGTCATCAGATGACGCGATGGTCTAACAAC
CATGTTAAGCTGGAGTTGTTGGAGCTCAAGCACATTGACAGATCTCACAGCCGTCTGGTCCTACAACGAATCCGTTGAA
ACAGAACATCAGACACATGACACCAGAGCATTCGGCACGCTTGGCTTCCCTGCACGTGCACGTCTGGCAGCCATCTTCA
TTAATCTCGTACCCAGAAGGACACGGAATACACTTCAACATGGGACATTCAGGTTGTGTCAGTGGAGATGCTGCAACAA
CTGTCAGTACAATTAAGATGGTGGCGAGAAGAAGTTTCATTCTGTTTGTGTAGGTGAGTGGCTCTGTGACAGAATTAAC
AAATATGTGTGTGCAATTAACCAGATGATACAATTACCCTGTTATCCCTATTTTTTTTT
>Contig386 22 reads, 279 bases
AAAAAAAATAGGGATAACAGGGTAATTGAGCACGCAGCCAACGCTACAATAAATACATGAACTTGCTCACCCAATGGTA
CAATAATTGCATGAGCACGCAGCMAACGCTACAATAAATACACGAACTTGCTCACCCAATGGTACAATAATTGCATGAG
CACGCAGCMAACGCTACAATAAATACACGAACTTGCTCACCCAATGGTACAATAATTGCATGAGCACGCAGCCAACGCT
ACAATAAATACACGAACTAGATCGGAAGAGCGTCGTGTAGGG
>Contig387 9387 reads, 853 bases
AAAAAATAGGGATAACAGGGTATCCATCAGCCGAGTTTCCTCCCTTTGCAGTGTAGTAGTTGTGTGTACTTGTGAGGTG
TCCGTCTTGTGACGTCATCTCTCTAGAAGCTGTCCACATTCTCAACATGGCTCCTCGTACTGTTCTGTCGTTGGCTCTC
GTGTTTTCTGTGTGTTTGACCAGTCGGGCTGTCCGCTTGACCAGCTGTAGTAAAGATCCATCAACTGATATCGTCAAAG
TGAAATCGTTCACTGCCAGTCCAACAACTATCCGGCTGCCAGGTAATCTGACAATTTCCGGAACATTCGCCGTCAGCCA
ACCAATCAGTGGCAACCTTCTGGTAGATGTAACCATCAGCAAAAATATGGGAGGGATGTGGATTGACCTCCCCTGTGTC
CCGACGCCACTTGGAGATCTTGGGTCATGCGTTTACAGAGATTTCTGTCAAATACTTGCCAAGACCAACTCCAGCTGCC
CCAAGGTTGTGACGGACATGGGCTTGTCGTGTAGTTGTCCAATACCAGCTGGCACATACGACTTGCAGCAGACGACCAT
CCCAATCGACTTGAAGATCTTGGGAGTGAGAATACCTGGCATAAGTGGCGAGTACCAGGCCAGTGTGAGAGTCACTGAT
GCCGACACGATGACTGAGTTCATTTGTTTCGATGTGGAGTTTGAACTTTCAGAGCCTGCAGCTCCAAACATATTTCGTA
ACATTGGCCGGTTCTTTGTCAACCTCTTTGGTCGCTAGCTCCAGGGTGTTAGGTGTTGGGTTCGAGCAATAAGATGAAA
AGTCTTATATTCAATTTCAATAAATTATTTGTATCATCTCAAAAAAAAAAAAAAAAAAARTAG
>Contig388 7962 reads, 908 bases
AAAAAAAAAAAAAAAAAAAAAAAAAATAGGGATAACAGGGTAATAATTCGTGCATCTTCTAGCAGGACGTGAACACCAC
GACGCGACAATGTTGGTCAAGACCCTTGCTCTGATCGCCTTCACTCTGCTGGGAAGCCATGTCCACGGCAATCACATCC
TCCAGTCTCTCAGTCTCGGTGACCTGGGAGAAGAAGACATCCTGCCAAAACCAAACGATAAAGATGGTGAGCTGGTGGC
TACCTGTAAAATTGAGACCGACCCCAGGTACCTGGCATCTCATAAATATAGGGGTGTCGTGACTATGAGACAGCGTCAA
GGTGAACCCCTGGAGGTCAAGTTGGACATCTACAATGACTCTCCCAAAGGCGCGAGCGTCAAGTCAACCAAACACGGCT
TCCACGTGCACAGGTACGGGGACATCACCAAGGGATGCGCAGCAGACGACCAGGACTATAACCCGGACAACGTCAAGCA
TGGACTGATCTCCAGCCGGATAAGACATGTTGGTGACTGGGGCAACATCGATCTCAAAGAAGGAGAACTCACAAGTTAC
ACGTTGTTCGATAACGTTGCTACACTCTTTGGGAATCGATCTATTATTGGACGATCGATCGTGATCCACGCCAAGGAAG
ATGATGGAGGAATTAGCTCACACCCCGAAAGTACCCTCAACGGCAACACTGGGGAGCCCGTAGCTTGCTGCGTGATCGG
TCTGGCCTCGGAGTAGACCCAACAGCTCACTCAGAAATGTGACCAGAACGCTACTGGACTCGTGTCTCAGAATTTCTGC
CGTTCATCATTTCATAAAAGTTTCTCCTGTTTTAAGAGCAAATATGACAGTAGCTGGAAGTTTAAACAAAGAAAATTAT
TTAAAAAACACACAAAAAAAAAAAAAATAGGGATAACAG
>Contig389 9278 reads, 1077 bases
TTGTTTTCATTGAAAAAAAAAAAAAAAAAAGAGGGATAACAGGGTAATAATTGGACCGCACACAGAGAGCCAGTTCGCA
ATCCCGTGGAGGTCTGTAGTCTATTGTCCAGCCAGCCATGTACACAGCTCATGTGATCGCATTTGTGTTGGCCTCACTA
GCCACTGTCCAAGCCTTATCTCATGCTTGTTTGGACCTCAAATATGAACGTCCATCTACCGTCAAGGGAATAAAGACAT
ATCCTCGCCCATGGGAGTACCCTGATGTAGTGGCGTCTCTCCCGTCACAGTGGGACTGGAGAAATGTGAGTGGTGTAAA
CTACGTCAGTACTACCAGAAATCAGCACATACCCCAGTACTGTGGTTCCTGTTGGTGCATGGCGGCCACTAGCGCATTG
GCTGACCGACTCAACATTGCACGTAAAGCTGTCTGGCCATCAGCCTATTTGTCCGCTCAGCACGTGATCGACTGTGCCA
ATGCCGGAAGTTGTGAAGGTGGCTCTGACGATGCAGTCTGGGAATACGCCCACACGCATGGCATCCCAGATGAAACTTG
CAACAACTACCAGGCCAAAGATCAAGATTGCACCGACTTCAACCAATGTGGGACATGCACAACATTTGGTCAATGTCAG
AAACTCAGCAATTTCAGATTAACTAAAGTTGGTGATTACGGCAGTGTGAAGGGGAGAGCTAACATTATGGCAGAGGTGT
ACAAGAATGGACCAGTCAGCTGTGGCATTGACGCTACAGACGGACTCGAGAAATACACCGGAGGCATCTATCAGGAACA
CAAAGTTTTACCCATGGAGAACCACGTGGTCAGTATCGCTGGCTGGGGTGTTGCTAATGGTATCGAATACTGGATAGTG
CGTAATTCTTGGGGTGAACCTTGGGGTGAAAGCGGATTTTTCCGTATAGTAACCAGCACATTCAAGGGAGGCAAAGGTG
ACGAATATAACTTGGGCATTGAAAAGAACTGTGCTTACGGTGACGTCATTGTTTGATTGTTATCTACACAGCATGTCTG
CTTTTAAAGATCAAATAAATAAAAGAAATTTGCAAAAAAAAAAAAAAAAA
>Contig390 6529 reads, 622 bases
AAAAAAAAAAAAATAGGGATAACAGGGTAATATCGTTCTGAGGCTGATTGTCTGATTCTACAACAGAACACAACACAAC
TAACAGACAATGTACAAGGCCGCTATTTTTGTTTTAACCTGTGTCTTGGCTGGTGCCGCTGCACTCGTGGGTAGGACCT
GTACGGCCACTGACCAGTGTGACGCTGGCGAGTGTTGTCAGATATTGAATGAGTTCATGATCATGAGCAGACGTCAAGC
TCCACTACTCAGCACGCCCCGTAACCCAACCAATGGAACTTGCCAGAAATACCGACTAGAGGGAAGCAACTGCGACACC
TTTGAGAAGATGAACGGCTACTGCAGCTGTGAGCCGGGCACCACGTGCCACATGTACGAGGTACCCGTGGACTCAGCGG
TCAAGGTCAGGATGATCGTGGCCCCCCGACCCGGGTACAGATGGGTCTCAAAATGTCAGAAACCGACAGCGTGAGTCTG
GTGGTAACTGTCGGTCTGACATGGACAAGTTGGCAATTAAACAGAAAGTCAAAGTCATGACTCGAGTCAAGCTGTCAGA
TGACAAAATTATGTTTCAATAAAATTATGTTCGACGTTTAAAAAAAAAAAAAAAAAATAGGGATAACAG
>Contig391 8283 reads, 485 bases
CTGCTGAACYATTGCTTAAATTGTTCCAGCTCCTCAATTTATTATTCGTTGAAGAGTTGAAATGGCATGCCGAAAGTCA
CTGAAGTCATTCTGAAAGGTCTTTAGTCAAATTTAACTTTGATTTCATCGCTATGATGTATCAAAACTTTAAACGTCCG
ATGTGATTGGGCCAGCCCCGCACACCCCCTTATAGGCTACGCCAACGGGTGGGCACACATGACAGGCGTTGCTGTAGGT
GACCACATCTGTCCCACACACGGGGTCGTACACAGCTGGGCAGGCCAGGCCTTCATTACATGGTCGTGGAGTGTTGGAA
GAATCTTGTTGAACACTGACGGCAAACAAGAATGCCGATAAAACCCAGCAACGTAACAGCATTTCTTTATTGCTTCTGT
ACCATTAACGCCCGAAACGACTGACTGAGCTGACAGGTAAACTATTACCCTGTTATCCCTATTTTTTTTTTTTTTTTTA
CAGTATTTGGG
>Contig392 9212 reads, 568 bases
AAAAAAAAAAAAATAGGGATAACAGGGTAATATCACTTGAGAGAAATCAACAGCTTATATTGTTTTATCGCCTCTGATA
CAGATACACAATGCATTTCGCTTTTATCTTTGTGTTAACAGCCGTAGTTTACGGCGTCAACGCTGCCATCTGCCCGACT
TGCTCCAATCAAAACGACTACACAACATGCACAGGACAACAGGACTGCCAGGCCGGACATGACGCATGTGAAACAAGAA
TCGATTTGAAAGATAACAAAATCGATTATCACTGCTCCAGCGCTCAGAACTGCGCCCACCAAGAAACCCAAAACAGCTG
TGACAACGCCGGCAACGACAACCACTGCGTCATCTGCTGCAACAGCCTAGCGGACTGTAAGGCCAAGCGCGACGACTAC
TTCTTGTTTGCTCCCATTGGTTAGTCTCCCGTTTTAAGGGTAAACAAGATTTCTGAATTGATGGCATCCACCAACAGAG
TATAAGTCTTCATTTTTTTAAATATTAAATCAAATATTGGCTTTAAAAAAAAAAAAAAAAAAATAGGGATAACAGGGTA
ATCTTTGAGCGGTGG
>Contig393 5430 reads, 746 bases
CAAAAAACAACAACTTTAAAGCTAATAATTTTTAGCAAAGTAATTAAATTAATTAACATTTTTTTTWAAATTTAACTCA
ATAAACGGTGATATGTTTTTAACTATTTTTTAAATCTTTGCCAGCTCTTGTTTATTTGACTTATTAGCATTCTGAAATA
ATGTCATGACAATATCTTTAAGTTTATTAAAATACCTAAAAAACAGAAATGAACAGAAAGGAGACAGCTTTAAATAGTA
ACAGAATGGACAGCTATCACTATAGAACAAGTGATAATAGTTTCACCACCAGGCACTGCGCTAGTGGCCGTGCATGTCC
AGGCAATTGTTTATCTGCCAAGGTATGCCTCACATCTGCAGTTGTTGCCCCACATTGTACACCTGCATGAGTTTTTGCC
ACAGCATCTAAGGAACTTGTATTTGTCAACCAATCGCTGATCTGTTGTGCATGGAGCCCGCCATGGGATACAAAGGTCG
TCATACGCTATTTTTGCTCTTGACCTTTTGTGGAATGCTTTTAGATATTTGTCCATGTTGTCATCACTGTCAAGATTAT
TTCCGTTCATGTTGATAGGTTCTGGGATCATATTGGCCATCAATTGTCCTGTGACGAAAACCAGCATTAACATCCAGAC
GATGCTCATGTTTGACATTTTGGAGACTTTTGCAGGTACCACTGCGTCACGATGGAGGAGATGGTAGGTAAAATTACCC
TGATTTTTTTTTTTTTTTTTTTTTTTTAAATTTTA
>Contig394 7461 reads, 837 bases
ATTTTTTTTCTTCAWTTAAAAAAAAAAAAAAAAATAGGGATAACAGGGGTAATGTGTCGTCCCCAAGTTGATCCACCTA
AGGCCTACAGTCATGGCTAAATTCACGGCTGCTCTTCTGCTGGTTGCTTGCGTTGCACTGACGGGTGGTCAATTGACGT
ATGACGCACAGATTGGCCTCTCCATACAATTCTGCCAGCGATGTGGATCCCCTGGACTGGATGATTTCTGCATCAAACG
TTACGGGAGATGGGGTCAAACGATACCAGCAGTAGGAAATTTCGGCTACGGAACATTCGGTGGACCGACAGGACGACCA
CCTCATGGATATTTTGGCGGTGTCACTAACAACGTCCCCAACTCATGCGTGACGCTGAAATCCTACGCCGCTGCCATCC
CCAACAGAGCGATACAGACCAACACCATTCCTATCTACGTCCCGACTGGGGACTGGGGTTCAACAGTGCCCAGGGTTTT
CTTCAATCCAATAGTCGCCCAGTTCTTGCCTGTGCAGTACCCACTTGACCACTATCTGGACAACAATGCTGGCTTCCCC
AACGGCGTCTGGAACTACGCCAACCCAAGCAGACCTGTTAAAAATGCTCTGAGGATTGACAGCTTCTATTACCAGGACA
ACGGCAACAACACCTGGTCTTACCAGTGCTACTGTGATTGGTGTCAGCAGGCACAGAGATGTACCAATGGATAAACATG
AGATTTGAAATTGTTGTTAACCGATTCAACTCTGACATCAGTTGCTCGTACCACGTTGAAATTTTACAAATACAATCAC
AAGTATCGAAAAAAAAAAAAAAAAAATAGGGATAACAGGGTAATAAG
>Contig395 6880 reads, 1192 bases
ACAGTGCAAGGGAAATCTCGAACTGCAGAAATGCAAAGATGATTTCGCAAAGGATTCCTGCCAGCAATCAATTGTCCAC
GTCAACGGCAACGGCAACGTCCACGTGAAGGCTTGCATCTCGGACTGCTGCACGACGGACGCTTGCTTGCAGAGCCACT
TTGGTGCTTACTGGGACCACGCCCCACACTGGACTACGTGGCATCCTGTGACTAACAACATCAACACAGATGCGACTGT
TAGGCCGACTATCACACAAGCGCCAGCTTCAACTACTGCAGCTCCTACTACAACGCTGGAACCGAAATCAACCACAACA
TCGACACAAGCACCAACCACAACCACCACAAGAGCACCGACAACGACCACTACCACGCCAGCACCAACTACAACTACCA
CGACAACCACACAAGCACCGACGACCACCAGAACCACCACCACAACCACCACCACCACGCCAGCACCAACTACGACCAC
CACAACAACCACGCAGGCACCAACGACAACCACCACACGCGCACCGACTACAACACGCACTACCACACAAGCGACCACT
ACCACAACAACAGCAACGACACAGGGCCATCTTGTAATAACACTGATACCACCCAGCACTGTAGAAAGTCTTGTAACTG
CCAACACACCGGTACCAGCCGCCACTGCTGAAACTGTAGAGACCCACAATGATCCTCCAGTTTTCTGCACGTCGTGTGT
TGGGGACGAGTGCCCCACGTCCACCGAAGTCGCCTACTGCATGCAGGGGTTCTGTAAGGTCACCATCAAGGACGATGGC
ACCGGAAAAAGAAATATAGAGAAGAGTTGTGCCACGAGAGCCGAGTGCCGCGCCCTCTGGTGGGATCAAACGTCCCACA
ACCAACAGTGCATGACGACGTTATCTACCCTGGACACAGCGACCCAAACCGACCTGTCCTGCACCTACTGCTGTCAGAG
CACCTACTGCAGTGATACTTTGTCCGCCAGCAACCTGGTTACATTCAGTTAGTTGACGACCAAAGTCAAAAAGTTATAT
ACTTGATGATCGTGTCAGTAACAGCGACATAACAGAATATTAAACATCTGCATTTTTGGAAAAAAAAAAAAAAAAATAG
GGATAACAGGGTAATAAGTTTCAAAATAGAAGAAAATCAGANTCACATTTCTTAGATTCACAGAAACAATACCTTGAAA
GAATTAT
>Contig396 7051 reads, 923 bases
TAACAGGGGAGGGTAATCTTAGGTTTTTATAACTCTGTTCTCCTCCACATTCGTGGTTTGTCTCCAGAACTCAACACAT
CACTAAAACAATGGCCACCGACCTCTCCAGAGACGAGATCGAAGAGATCCGTGAAGTGTTTGAGCTCTTTGACTTCTGG
GATGGTCGTGACGGTGAGGTGGACGCCTTCAAGACAGGTCACATGCTGTACTGCCTGGGTTTGAACCCCACCCAGGAAA
CTATCAGGAAGTATGGAGGAACCAACAAACTGGGCGAGAAAGCCTACAAACTCGAGGAGTTTTTGCCCATCTTCTCGGC
TGTCTCCAAAGAGAAGGACACCGGCACCTTCGCCGACTTCAATGAGGCATTCAAGACTTTCGACAGGGAGAGCCAGGGA
TTCATCTCAGCTGCTGAAATGAGACACGTCTTGACATGTCTGGGAGAGAAACTTAAAGACGAGGAAGTGGATGACATCA
TCAAAGCCACAGAGACCCGAGAGGACTTGGAAGGAAATATCAAATACGAAGATTTCATCCAGAAAGTACTCAAAGGCCC
ATATGAATAAACCAGTCACCGAGACATCAAAGTCATTACATCTTTTATTTTAATACGTTCTGATGTTTTCTCTTCTTTA
ATTTCAAAGTTTTCGTGAAGAAAACTATTTTAAGGTTGAAATAGTGATATATCTTAACAAACTTACAAGCTGAAGTTTG
TTGGAGAAGCTGAACTGAAATTGTCATCGATTTTTTAAAAAGCATTGAAGAAGTTACTGTTTTATTTTCAAAAAGATGT
TTTACGATAGGTTAAATTTTAACCTTCCTTAATTGTTTCCTCCCCCAGATATTTATCTGGCGCCCAAGAATGAATGTTT
ACAGTAAAAAAACAAAAACAAACCACATTGTCTTTTGTCCAGGWGAGCGGTTCA
>Contig397 5321 reads, 858 bases
TGAACSGGTTGTCGCCCACTTCCCCGTGTTATACTGTTAATGAGTTACAGTGTTTTCTAGGTCTTGAGTTGATCACTAC
TGTAGGCTATAAATTTTAATTGTATTTAAAATTATCAGAAATACTTAATTTATGTTAATATTATAAATAAACAAGACAA
AATGGCGTCCTATTGAAAGCTTTACTCTACTGTAGTTAACTTGTTACCATGGATTCAGATGGATTGCCTTTGGTGGGGC
CTGGGATTAATTACACAAAGGTTGAAGCTATCAATCAAAAAAGAACCATAGCCTTTATCAATCACTTCATTACACACAC
AGCTCGATTTCTGAACCATTTTGGCAATGTCTGTGAGGACAAACTGGAGCTACTCCATGGCCGACTACAGCAACTGGAG
ATTTCACTGAGCATGTTAGAAGCCAAGTTGTCATCTATACCTGGTCTTGAATCAGTGACAGCACCAGCATCAAATTCAT
CAGCACCAGCGTCAGCACCTGCCACTGAAACACCCACACCAACTGCAGCACCAGTATCTGCTCCTATTGCAGCATCAGC
ACCCATGCAAAATGAACCTCCACCAACGCCAGTAGAAGAAATCAAACCCCAAAATACAGTTGCTCAAGATCCTCGATAT
ATGAAATTTTTCAAAATGTTACAGTTTGGAGTTCCTCCTCCTGCTGTGAAAGGTAAAATGGTGATGGAAGGTTTAAATC
CAGAGCTATTAGATACTCCTGATGCCCCCGCTCCAGCAGGTGGTCCAAGTCCTTCGTCCCAAGACAGTGATCAGGATTC
AGACAGTGATGCTAGCTTTAGTGACTAACTCAATAATAAAGCCACATCTCTCTTGAAAAAAAAAAAAA
>Contig398 3684 reads, 705 bases
CCGAATAGGGTAATATAAAAGTTTATCCGGAACCTAATGAAAACAATACACTCCCTCCAGTTAAACTTAATGAATTTTT
CTATCGTCGATGGTTCTTGATTTAGATTAGAACCTTCCTTAAAATGTCAACTTGCTCAGTGTGTAATATTCCTACCAAT
AAATATAAATGCCCTAAATGTTTAGAGCGTTATTGCTCGTTGGCCTGTTGCAAAGCCCACAGAGAAACATGTTCACAGA
TACCTAAACAGGAGCCTACTACTAATGTTATAACAGGACCAGAAGTCCCTGTGCATATACCATACGTTCAGGAAGTGCA
TCATTCATTTAGTGATGTATTGATGAACGCTAATGAAGACCGGGTCCCAGAGGAGCTGCTTGGAAAACTTGGTGATTCG
GCTGACTTGAAGTCTGTCCTCAACAACCCGCACCTTCGGGCCATGATGGAGAACTTGGTGAACACAGACGCCCCCGAGC
TGATGATGGCCAAGGCCATGAAGGAGCCCATATTCACAGAGTTTGCCGACCTCTGCCTAAAAATTGTTGACCGGGACAA
TCCGAACCTGGAGCTTGAGCAAACAAACAATGAATTTTAGTTCATTTTTAAAAAAAAAAATCTGTTTTATTGTTGAATC
TGTTTCACCACCATTATGTTTTCACACAAAAACAAAAAATTAAAAAAATGATAATTCTATAGARAAAAAAAAA
>Contig399 18039 reads, 736 bases
ATGGCTATCACATTTTAAACATAACTGATGATGAGTTAGAAATATGATAACATTTTTATTTTTAAATTTGTAATATAAA
TGCTTATTTCCAGTAAAAAAAAAAAAAAAAAATAGGGATAACAGGGTAATCACAAGTCTTTGGACGAGAGCCCCCAGCC
GTAACCTTCCGTCTCATCACCGCAAGCTGAACGATGTATCTGGTCGCAATCTTCGTTTGCCTCCCGGCACTGGCCATGA
GCGCCATTGACTGGGATCTTGTGGCTTCCGGGGCATTCGCCAACATCGACCAAAACAATGACAACTCCTTGGAGAAGGG
TGAAGTCGAGAATTACTTCAGGCAAACCTACGACACCAACAACGACAACCAGGTCACCAAAGCAGAGTACGTCGCCGTC
ATCACCGCCGCCAACGCCGGAGACAACAACCTCGTCAAGGCCCTGACCGACCTCTTCGAGGACCTCGACTACAACAACG
ACGGCGTCCTGGACAAGGACGACAACGACAAACTCTTCGACACCATCGACGCCAACAACAACAATCACGTGACACAGCT
GGAGTTCACCACATGGTTTGATCTTGCCATTAAACCCAACGCTGGTTAACTGATTGCACAGTTGCACAATGTTGATTTT
AAAAAAAAATCAATGATCGATATATGTATTTCCCTTAAGTTTTTCACACTTAAAAATAAAATGATTATGAATTTAAAAA
AAAAAAAAAAAAATAGGGATAACAG
>Contig400 3752 reads, 634 bases
CGACGCTCTTCCGATCCGCGCCGAGTGCCGAGAATTCTCCAAGACAAACAATCAACAAAACAGAAAGTGCAGTGACCAA
AGCAGCCATCATTGGATTTAGCAGATTTTTGCTGATTATTAATTAATTCAATGTCCAGTTTCACCAACACTTCTTGTTT
CCTTTCACAGTTGTACATATTACCCTGTTATCCCTATTTTTTTTTTTTTTTTTCTTTTGCAAAGAAAARGTAATTATAT
TTTCCTATATTTCTGGTTGAATTATGACATTTCTGGCTGACTTAACAGCGACTTATGTTATTGGGTCTGGGAGAACTTT
GTTGCTGCATTGACGATTTTATTAAGAAATTCAACGGCATCATTCACTTTGTCGAGACTCACTTCACCGACCGGAATCG
ATTTGTCAACTGTTGCGGGATACTGTGATGCTTCAGAGGACACATCTCTTCCAACAGCAATCGCAAGATTCACCCCGGC
TAGAATTACCGCGTGCCTGTGTCTTGTCCACCAAGATCGTCTGGCTCTCTCTCCAACATCGCGCTTTGAGCTCTGGAAA
AATTGTTTCAGCGTTTCAATCGAATCATCAATCTTTGTATTCACGTCATTGACAAGCTGTGCAGCAGTGTCTTGTGTGY
CC
>Contig401 10387 reads, 820 bases
AGACAATTGCCTTATATTAAAACCGTAGACAAAAATCGATCATTGGGGCTGGGGTCARCCTTATACCCTGTTATCCCTA
TTTTTTTTTTTTTTTTTTTGAATGAAAAACATGTTTTATTTATGTCAAGATGTTTCACTATCGTCTGTGCCGTGTCCAG
ATCAATGGTCCTTGAAACTCTTTGATGGGTGGCCATGTTTATTTAGTAATGTGGCCACGTCTTAATGAGATGCCAGAAA
GCGGTGCCCGGGCACTCGGTGCTGCCCATGTCTCTGTGACCTCTGAGGACGTATGCTGATTGGATCTTGCCAGCAGCCA
CACCACAGGCGATGAGATCTTTGACAGCCTGCTGAGCTGCTGCAGTTGGCACGTGACTGGTGAAAGTGCCGATGAAACA
GAAACCGTATCCAACACTGTTGTAGTTCAAAGTGTGAGCCCCAACAACATTCCAGCCACGCCCCTCAAACACTGAGCCG
TCACCACCGATGACGTAGGTGTAGCCGATATCAGACCAACCATGTGTGTCCATGTGGTAGTTCTGAAAGCTCTTGACTT
GTGCCTGGCATGAGGCCCTGTCGTGACACTCTGCTCCAGCTGAATGATGGATGAAGGCGTAATGGACCGGTCCAGCCAG
GTGAGTTACACTCTTGGGGGCACGAGCCCCCCACTGGGCCCTGGTGATGATGTGGGGACAGGCTCCAAAGACCAGACTG
ATCTGGAGACAGACAAAGACGGCGAGTATTCCTCCAATCATCTTGACAGAGTTCCAATCTATTACCCTGTTATCCCTAT
TTTTTTTWTTTTTTTTTTTTTTGACACAGA
>Contig402 4052 reads, 968 bases
TAAAAAAAATAGGGATAACAGGGTAATACAATCAAATTAGCCTGTTAGCTCTAAGAGATTCGAAGAGGAACGGCGTTTA
GATTTGATCACTGTGTGCCACAAAGAATCAAAACTGAATTTTAAATAATAATAATAATAAATCTTTAAACTTCAGAATT
TTAAAGTTAAATATATTTTAATGTGTTTCTGTCGATAGAGCAGTAGCGAGTTATTGAGTCACTGAGATTTTAGACGCAG
GTTTATTTCTGTTTTAGATAGTACACGGACCACAAAGAGTCAAATATGTTTACTTATCTACTACTCCTGTGTGTGGCTG
TTTGTAACGCTGCCCCTTATGCCAACGCCGGCCTTAAAAGACAGGACGAACTGCCCACATCGCTGTACGGCAACCCACT
CAGCTACAACCAGATCGTCGACCTCATCAAAGAACACACTGGAGGCAAGAGGCAGAGCTTGTCGTTGTTCGGTGATCCA
CTCACTCACTCCCAAATTATCGATTTGATCAGAGAGCACACCAGTAGCAAGAGACAAGCTCTTCACGCAGTCAACCACA
TTCTACACAACATGCTCACCACCAACGACGATGCCCGTTTCTGGACACTGCACCCTGACCCCCTTGTTACCCTACTGAC
CACAGCCCAGGAGAATGACCAGACCTTGACCCAATATTTCAGTGACCTCAGCTACAACGAGATTCTCCAAATCCTCGGG
GAACTCATGAAAGGACACTGACAACTTACGAGGAATCTCACCCCGTAGAAAGGGAGCGCCTCGCAAGCCACGTCCATCT
TTTTTGAAAGGAGGTTTCGTTGAATTCTATCGATGCCGTTTTTTTATTTTTTAAAATTTAGTTTAAATTATATATAGAC
CAGGCTGAAATGGTTTTCCATGCTTGGGCAACTTTCAGGATATTAATAAAGGCATTTATAGTCAGATGACATGATAATC
AATAAAWAATCTGTTTTTAA
>Contig403 7718 reads, 994 bases
TTTTTTTTTTTTTTCATATAAATTCATTTAATATAGCCACACCATCAAATTACATATCATTGTTGATGGTCGAAACGAT
TTAATGTTTGACTTTTGATAATCGCATTTAACATCATACACAATGTCGAACTCAAACAAAGTCTTCAACTCATGAAAAA
CTCTGTCTAACTTAGACTACATCGACTAGTTTATGTGTGTGTTGTTGTTGTTTTTTTACAAAGCTCCTCCTTTTTCTGT
TAAATGGGTGTTTACAATTAGTGCTCCGTTGGTTTTCTGTTGGCCAAGTAAGCCTTGATATTTTCATCGCCCTCCACCT
TTTCGATCAGGGTCTGGACAAGAGGGTAAGCCTCCGTGTTGACCAGTCCTCGCTTGACCAGTGACTCGAGTTGGTCGAA
TACAACAACGTCGGCAAGCGTCAGCGACGAACCAACGAAGAAGCCAGTGCCATTCTCTCTGAGCAGTTTCTCAAAAAAT
GCCAAGAATTTGGGAACTTCGACTTCTTTGACGTTTTTCAAAAGCTCAGCCTTCTTTGCTTCGTCTCTTTCTCTGTGTG
ACCTTGAGAGCGCCGTGCTGAAGTCTGCAGATAGCTGGACGACCTGGTCAATTTCGAGGGACTCAAGGTTCGACTGACC
ATACAACCCAAGTTCTCTGGCCAAGTAGGCTTCGATGGCCCTGCTCTGTGCGTAGCGTTTGCCGTCCACTTCAAGCACT
GGCAGCTGACCGAACGGTGTATTTGGTTTTTCTGCAGACCAACTGTCACGTGCTAACCTGACGTCATCGTATTGTTTTC
CGGCTGCGGCAAGAAGGAGCCTGGAAACCTCGGCGCGTCCTCGGGCATCGAAATAAATCAGTTTGATGTTCTTTGGAGA
CATTTTATTCTTGTTATTAAATGTATGCAGTATAAATTTGTAATGATTTATTTGGCGTTAAACAACAATTCAGAAGTCT
AGTCAGGCTGGTAGATTACCCTGTTATCCCTATTTTTTTTTTTTTT
>Contig404 4033 reads, 669 bases
TTTTTTTTTTATGACAAGGACATGGGTTTATTTACACTATGACACCTCACTCAACAAAACAAATTCATGCTAAAATAGA
ATGTCTATGTAGAAATGGCTGCTTCATCTAGTTTTTGAGCAACAGGTTCAACATCTGGCATCTCTAGGTCAACATTATC
GGTAGTCTGTGAGCTGTGTCCAGCACCTGGAACTTTGAGCTTGGCCGGGGCCAGCAACACCTTTGTAATGTCAGCATTT
AGGAGGTCAATCTTCTTGGTGTTGTCAAACGTCATCTTCTTCAAGTTTGACTTGATGGCTTTGTTCTGAGTCTTTCTAT
TCTTGGCTTTGGTCTTTGCTATCTTCACTTTCTTGGCCTTCTGTGCGGCCTTGGCCTTGGGGCCCTGCACCTTCTTCTG
GCCTATACGCCCTTTCTTCTTCCCCATTGTTGTGCTGACTGAAACAGAATAACATGCGTCAATAGGGAGATGTTGACAT
CATGGGGTCACGACTGGATCTACTTGTCAATACAGCACACAGGAATCATCTAGGTCTAGCTCATAGATTCTCATCAACA
CAATGATCATTAAACTAGACAAGTGTTAACTTGTAAATATTCACAGTTTCTGGCATCATGTGGGGGACGTTACTGTTAG
CAGGAAGTAAGAATTACCCTGTTATCCCTATTTTTTT
>Contig405 5154 reads, 604 bases
CATATTTTGAATAAAAAATGGATATTGTATAAAAAAAAAAAAAAAAAAATAGGGATAACAGGGTAATGTGATCTGTCTA
ACTAGAAGCCACGCCGCCTCGGTTCGAAACCTGACCATGAGGAACTTGATACTAACACTGCTAGCCTTGGGCTGCTTGA
CGTGTGTCTTTGGAATCTTGCCCATAAATGAACCATGGAATTCATATCCAGGAAACAGAAAATGGCCGCCGTTTGTTTT
GTCTAAAAGAGATGATGGAATCGACAAAAGAGCAGCAATCAATAGTTTTGATGATTTTGGAGACAGGAGTGTCATCTCC
AAGAGAGACGTCAAGAAAAGATTTTTTTCACTTACCCGTAGGCCATTCCCTTGGAAAGACCATTTCTACTCGTAAAGAT
TTTGCTGACCAACATCCATTGCGGCAACCAGAAAATGACCATTATTGGAGGATACAGCTGAGGAGCTAAAAGAAACGCT
TCAAAAAGAACACGTTGACCAAAGTAAACGAAAATAAATGTATTGTTTTCACCAGCTCTGTTCAGTTTGAAAATAAAAA
TTGTTTGTAAATTTGAAAAAAAAAAAAAAAAAATAGGGATAACAGGGTAAT
>Contig406 289 reads, 280 bases
CAATTTCATCATTAGCTTTGTCAAATAAAAAACACATGAATGAAAAAAAAAAAAAAAAATAGGGATAACAGGGTAATAC
AACCGGCAAGTACCAGCCATGCCCAGGTGTTGTCAACACACCAAAATGCGTCAAGAAATGCAGAACCGGTTACGCCAAG
TCTTACTCCAACGATAAAACCAAAGGCAAGAAGTCCTACGGTGTCCGAGGGGTCCAGCAAATCATGCAGGAGCTCGTCG
ACAATGGACCAGTGACCGCTGCCTTCGACGATCGGAAGAGCGG
>Contig407 7870 reads, 1136 bases
GGGTAATCTTTTTCCACGCCACTTTTCCAAAAACCCACTCCATTTTTTAGCCGTTCGTTTCCCTCTGTGTGTTGTTGGA
TCCCACTCCGTCACTAGACTAGTTGATTCGCTTCGGTCTGATAGCAGGACTAGCTGGTCTGAGAAAATTTGGACTTGGA
TCTACACTACTGCCTAGCATGCAATGTAGTTTTATTTACAGTTGACATAAATAATTTTGTTGAAGATGGTAAGGCTAAT
GCCTAGATTTGCTACTAACTTTTATGAGTTTATTATACGAACTGCAGAACCCAAAGTTCCCCCAAAGCTTAGACCACTG
TGGGTGCATCCAGCTGGTCCAAAGACTATATTTTTCTGGTCACCGTTTGCTAAATGGCTTCTTGTCATCGCTGGCCTGG
GGGACATAAGCCGACCTGCTGAGAAACTCAGTCTACGTCAGAGCACGGCCCTATGTGTAACTGGTTTCATTTGGTCCAG
GTACTCACTGGTGATAATACCCAAAAACTGGAGCCTGTTTGCTGTCAACTTTTTCACAGGGTTGACTGGTACCATGCAA
CTGAGCAGAATTGCACACAATGAGTATGTTGTGAAGCCACAAAGAGAGTCAGAGGCCATTGAAAGGTTGCATAATAAAT
ACAAATCTGTAGCTGAGAATGGTGCCGAAGTGAAGAAAGCTGTTTAAATAGACTTTTTGCCAACTCGTCGTGATATGCT
TGTTACCCGCTATTAACTTTAAAGGATAATATAATAAGCTCAAATAAGGTGCCATATTTAATTCACTAAAAAATACTGA
TTTGATAAAGATGCAAATATGTACATAAGGAACAAATTATCTTATCATGTAACTTAGTTCAAATGATGAATAAGTAGCT
TTGAATGGATTATAGAGATGTTTTCCTATTACAATTAACAGCAGAGAATTCAATTAGATATTGTTTTGTTTTAAGACGT
CAAAAAAAATAGCAGCTTGTATCAAGTACTACTCCAGTTAATTCAAATTGTACCATTACATTATGCTTAGAGTATTTCA
AAATAGTCATTAGTGATCCTGTATAACCGTGCTGTTACAGGATAGTTCTGAAAATAATATGCATGTAGCTTTGTCTGTA
ATCCAGTGGGAAVAAARKATTTAAAAGGTG
>Contig408 380 reads, 358 bases
TAAAATTTCCCGACCAGTAACTGTCCTTAACTGTTTTGTTTAAAGTAAAGAATTTGATGTTACTTGAATTTTTAATTTA
AAATAAAAGAGTTGTCAAAAGCCAAAAAAAAAAAAAAAATAGGGATAACAGGGTAATAGAAAGCAAGCCAAAGCCGATA
TTTTCTTCATCGTGGAATAGATACTCAGTTAAATAAACAAAATGGCTTTCTCACACACAACGGCGCAGATCGGAGTGTT
GCTGACGATATTAGTTAGCATCGTTCACTCACAGATGGCTGGCCAACCAGCCCAGGCCCCCATGGATCTCAGTGCAATG
CTCGCCAACTCAGGTAGCTTTCCCCAGCCAGGCTTGGGGGGA
>Contig409 5017 reads, 589 bases
AAAAAAAAAAAAAAAAAAAAAAAAAAAAAAAAATAGGGATAACAGGGTAATACAATAGTTGTTCCGGTTTAGACGAAGG
TCGTATACTTTCTGTGTACCAGAATACTGCACTTAGTTTGACTTAGTTAAAGATAATTTACACCGCAACCCTCAGTATG
GCGACGGCAAAACCAGCCCTTCGTAACCTTCTTATGAATAAGACAAAGAAAGACTTTATAGTAGCACTCACAGTGGCAG
TTTCTTGTGCATTAGCATACAACTTTGGTGTCAAAGAGCGGAGGAGAAAGCACTTTGAGGAATTCCACAAGACATTTGA
TGTTCAGGCACACCGCCAAAGATTAATCGATAAAGGTGTTTTCCAAAGAACGAGTTACCAATATTCCAATGACGAGGAA
TAAAATAGTTGGACATTTTAGGTGCTGTGAGGCTTGTAGTCTCTATCAAGGCTGACAAGTTCCATCTGAATGTTTTAAT
TTTCAGTTTTGTTGAAAGGTTGTTTTTTTACATGATTGTTAGTGATGAGTGTGTCTATAAGAACCTTCATTAAAACAAG
TGAAATCAAAAAAAAAAAAAAAAARGGATAACAGGG
>Contig410 9105 reads, 655 bases
TTTTTTTTTHTTTTTTTTTTTTTTTTTTGAGACTTCTTAAAATGATTTATTGATAGTAATTTATTGGCGAGAAAAAATT
CATTGCATGGATGTAATTGTGCACCGACTGCGTCTCACGTAAACTATATTTCGAAGTCCAAACACTTATCGCAAATTAA
TAAAGTGACAACAGTTAATTTAAATATCTCTTTCCTGATCCAAGAGCTGCAGCGATTGCCTGGATTGTTTGCTGAACGG
TTGATAGAAAGGTCTCGGCGTTTCTCTTTCCGCCAACAAGTGATCCTATTTGGTTTATTAGGGCATCAATTTCATGTCC
AATGGCAGCTAAGTCAATGTTTCTCTTTCCTGATCCAAGAGCTGCAGCAATTGCCTGGATTGTTTGCTGAACGGTTGAT
AGAAAGGTCTCGGCGTTTCTTTTTCCACCAAGAAGGTTTCCAAGCTGTGCTACAAGGACATCAATATCCTTGCCAAGGG
CAACTAAGTCGAGGTTTCTCTTTCCTGATCCTAGTGTTCCGGCAACAAGGTCTATGACATGTTGAACGGTGGTGAGGAG
ATCTTCGGCGTTTCTTTTTCCTGATCCAAGAGCTGCAGCGATTGCCTGGATTGTTTGCTGAACGGTTGATAGAAAAGTC
TCGGCGTTTCCCTGTTATCCCTA
>Contig411 4124 reads, 523 bases
ATCCGGTTGTTCTTCTTATAAAAAGACGACACAGTCTATGAGGGTAATATAAAACGGCCCCAGCGACATCTTTTAGACA
ACAATCCTCCCACAATCTCGGACCTCTGACCATGCGTCCAGTACTGAAGCTCTCTGTCGTCTGCCTGGCCCTTGCAGTA
GCGGCACTGATGACGCAACCTGCAGCGGCGAACCCAGTGGGGGACTGCTATGAAGCGTGGAGCCTCTGCTCTTGGTGGA
GATATTTTATGACCGACGTACCAATCATTGGTTGGACATCTTGTCCTAATAGGTGTGTAGAACTTGGCCACAGGACAGG
TGATTGTATCCTGACCCCCTCGAACTGTACGATAGCCACTGAGGCCTACCAGTGCCAGTGTTCTGATTAGTAAGGAGTT
GAAGCAACTGCGAAGCGTTTTTAATCGGATATTCTCTACAAAAATATGCGCTTCGCAATCTAAGTTGAAAGTATAAAAA
ATAAATCATTGTAAAATGAAAAAAAAAAAAAAAAATAGGGATAACAGGG
>Contig412 293 reads, 319 bases
CTTATTACCCTGTTATCCCTATTTTTTTTTTTTTTTTTTACATTACAACATCATTTAATGTCAATCATTAAAAAAAAAG
TTTTAAAAAATTAAATTAATGTGCTGACGGCACAACATCGATCGAGGTAAAGCAGTGTCAGCATTCGATCAATGACCAT
GGACGCAACTGACTATGAACAGGATGAGGGATGAAGATGAAGTGTCCATTAGGGGCGTCTAGTTATTTCTTGGAGTCCT
TTTTGGCACCTTTCTCTCCAGCTTTGGAGCCCTCAGTTAGATCGGAAGAGCGGAAGAGCGTCGTGTAGGGAAAGAGTGT
AGA
>Contig413 6011 reads, 860 bases
TTCWTTTTTTTTAAATTTATTATCTTTAATAAAGGTGACATCTGCATCAGTTGGTTCATTTGATAAAAACAAAAAATTA
GCACATGCAGTGAGATTAATCCTGTCAACTAGAAAGTAGAGCTAGGCTTGTGTCAGGTTGAATCCTTCTATCTTCCTTC
CTCTCCAAGTGAGCGCTGAGACTGATCACATATTGAATGCTACCCGCGCCGAGCGACTGGATATAGATGACACGCGCAC
CGTGACAACACTTGTATGGGGATGTAGTTCGTCACTCTCGGTTGTTTTGTAACGAAGATGTGTGCGAATATGTTTGAGA
CGCCTTGTTCACACTCAGACCTGTACATGGAAGTGTTAACCCCACGACACGCCTGGGACGCTGTTCGGCACTCCACAAC
ATAAAACCACTGCCTGAAAGTGTCCTGCACCAGCTCCACCAGTTGTTCGTTGTTGTTATAAGCATGGGTCAAGTTGACG
AAACGGGCGTTCACTGGACAGTCAAAGCACCTGTCTGACATCAGCTGCCTTTTCCTAACATCAACATTGAATAGATCCT
CGGCCTCGACCTCAGCAGACTCAAATCCAGATTGTCCGATGATGTCTCGTCTCTTGATCTCTGATTGCATAGACGTGAA
ATCCTCCTCAGCTCTTGCCCTATTTAAATGCGTTGTTGGGGCATCAAGGTCTGGTTGTTCAGAAATGGTATACGAATCA
GCCATCGTCTTTGTTATGACAGCAAACATCAACATTAGTTGAAGCATCGCGCGGCTCAACAGTAAACCGACAGATGGCG
CTGTGGCGGGATAAATGGACATTTCTTTCTGCACACAAAAAAACTATTACCCTGTTATCCCTATTTTWTA
>Contig414 1007 reads, 459 bases
AAAAAAAAAAAAAAATAGGGATAACAGGGTAATATCACCTGTCAACTCTCCAAAACACCTGAAATAGTGTTTTTGAAAC
TTTAGGTGATCTGACGAGAAAAAATAAGAGATGGCTAACTTTCAGCTTTGCTTACTTCTGTCCATTATTGGCTGCACCT
TCGCCCAGCAAAACTACCCAAGGCCAACTCCTTACCCAAATCAACCAACCTACCCAAATCAACCAACCTACCCAAATCA
ACCAACATACCCAAATCAACCAACCTACCCAAATCAACCAACCTACCCAAATCAACCAACCTACCCAAATCAACCAACC
TACCCAAATCAACCAACCTACCCAAATCAACCAACCTACCCAAATCAACCAACCTACCCAAATCAACCAACCTACCCAA
ATCAACCAACCTACCCAAATCAACCAACCTACCCAAATCAACCAACCAGATCGGAAGAGCGTCG
>Contig415 6406 reads, 769 bases
CGAYTCACTATGGGCTAGGGATAACAGGGTAATCGGGCTTTACCAACCACGATCGGGTTGTCCGGCCAACACGTCAGAC
ATCACCTGGGTGAGCGGCTACCGCAGACACCACACCGAACCCATCAACAACATCGACCACGTGTCTGACGGTGGGAACA
TGGCGATACCCATCTTCGAGGAGGTGGGCACCGATTACTACTTCAACCAGAGGTTCTGCATGGTCCCAACCCCAGCCAA
CGGCCCTGCCTGGCCCAGGGGCTCCTACTGCATCAACAGGAAGGGCGGCTCCTGCCCGGCCGGGTTCAACTCCGGCTAC
ATTGAAATCGACGACTACAGCAACTCCCAGGACATCGTGTCCGGCTCCGTCCCTGACGGAACCTACGGCACCACATCCA
TCATCTACTACTGCTGCCGCAACGACGGGCTGCCCAGCGACCCGATCACGCTGCCGACCAGCAGGTCGTTCTACCTATA
CAGGTACAGCACCCAGTGTCAGCGTGTCAGCGGTATGGTGGAGCAGCAGGAGTACATCTTCATCGACACGGCCAGCACC
AACAACCTTGATAAGTACGAGAACCAGTGGCATCCCTCGGGCAGCTTGAATGACGTCAGAATTCAGCTCTGCTACTACA
GACCGGCTTAAACATCTAAACAGATTAATTATTTTAGTCGCCAGCGACGTGAACGGTCAGTTCTACGATTTAAAGACAA
TAAACTTCAACGTTTTAACAAAAAAAAAAAAAAAAAATAGGGATAACAGGGWAATAAG
>Contig416 6456 reads, 839 bases
CCCTGTTATCCCTATTTTTTTTTTTTTTTTTTTTGAGGGAATGTATTTATTACATTATTTTGGTAATAATAACTCTACA
ATAGTTTCACAACAGCTGTAAGATATTAAACAAATCACATGAAGAGATTCATTGCTTTATAGGTAAGTAAAAGGGTCCA
CAACATTAGAGAAAGTGGTGCATACACCTTCGCACCATTCCCAGGAGTGGTGCTAGTGACGCCAACAGTCTGACTTGTC
ACACTACTGCAGCTAGGAGACTGAACTTTGACCTCCACCGTTTTCGTATCCGTGTTTCCCGAAGAGTCAGTTGCGATAC
AGGCGATGATGTCGTTCATAACACACGTGGCCGCTACTGAGTTAGTGATGCTTCTTGATGAGATCGAAACACTCGGACC
TCCAAATATGTAGATACCAGATTTTGTTGCTTGGAGAGCCCACGCTGGATTAGTTACACTGTCCAGTTTGTCACAAAAG
AAGGTAATTGAGTCACCGAGATTGACTGTCACTTGCGAAGTTTGGTTGTTTACGGTAAAACTACCAATCAGGGGGGTTG
TTGCTGCGTCCAAAGGACTAACAATAAATTCACTTCCTGACATAAACACCAGAAAGAACACTGATAAGCCACAAAGTGT
CGTCATTTGAATGTATTACTATTGTCTTTGTTTATTTTTTAAACGCCTTTGTCTTAAACACAGATTTTCATTGAATTCT
TTCAAACGAAGACTCCTAGTACTTTTTAAACTGAATAACGCAGCAATATTCTTTTTTTTAAAAATGGATAAAGAGACAG
CGATGAAAGATCTTAAACTGCGTAAATCTGACACCCGTTTTAATTACCC
>Contig417 5751 reads, 1031 bases
AAAAAAATAGGGATAACAGGGTAATCATTTCGTTAGATGCGATCCATGAACACGTCAGGATCGGGTCAATCACGCACAA
TAAGAATTGCATAAACGTTGCTCTAACAATGAATACCTTAATTATTTTAACAGTGCTGGCCACACTGACAGCCTCAAGT
CTTGCTCAGTCAAAATGTGCGTTAACGAGCAACTGCCGTTGTCAGATAGACGCAAACTCGTTCGTTGATCTAAATAAAA
TCACTGAGCGTTTAAAGGTTACCTCAGGACTTGTTGAAAAATTTACCTTACAGCCGTGCCAAAAGTTCACTATCAAAGG
CGTATGCACGGGCGTGTTTGCCTGTTCAGAAGTGATTGTAGATTACCATTCGTTAGGGAATGTTAGTCAATTCGTTGAC
TCAAGCACCATAAAGTATCTGGGTAACGACAGATCTGCAGTGTTAAAACTTAAATGTGATGCCAAAGCTAAAGACAGCT
TATCATATCAAGGCAAGACAAATAATGTATACAACTTTGTGCTAACAAGTAAATTTGCATGTGTGGAAAGCTTGTTGAC
AACTACAACGACAATATCATCATCGACAACGACGAAAACTACGACTAAATCCACGCCAACTACCAAGACGACAACTCCA
ACAACAAAATCGACGCCAGCAACCAACTCGACGACGACAACGAAGGCGACCACAAAATCCAGCACGACAACACCGAAGA
CCAACAGCACCACCACCGCAAAAAGCACATCGACGACCGCCACCACAAAGAGCTCGTCAACGACCGCCACCACAAAAAC
TTCACCGACCACCACGAAATCGTCTACCAAACTGTCAAGCACAACACAGAAGGTGCCGTCAACAACCGGGGCAGCCAGT
ACTTTCTGCACACTTACATTTGGCAGCCTTCTTTTGGCCGTGATCTTGTCTAGGACACTTCAGTGAGATGTGGATTTAT
GTGGGAAAATTCAAAAGAACCAGAATAGCCTCGATGTCCTGAAAAATTGATATACAAAAATAAAAAAAAAACCAATAAA
AAAA
>Contig418 9346 reads, 995 bases
GCTCTTCCGATCTGCAACATGTACTGTAACGATAGATTCAGTCGGTCGATGTGTGAAATACCCATTCCTGAATGATGGG
CGTGCGGCAAAAAAAATAATTCTTGAACGCATGAGATTTTAAAAGTGTAACAAATAATAAAAGACGCGAAAAATATCGC
GTTTAACTTCAAAAAAAAAAAAAAAAATAGGGATAACAGGGTAATATAACCAGAAAATATCAGTCGTGTCCACTTCACT
CAAGTATATCAGTCGTGTCCACTTCACTCAAGTATATCAGTCGTGTCCACTTCAATCAAGTCCAAAAATGTTTCTTGCT
CTTTCACTGGCAGTTCTACTCAGTTTGGTTACATCCCAAACTGTGAACGACTGCCCAGCGGCCATCCCGAGAGACGTTC
ATCTCCAAGTCCATGGAGGTCTGTGTTATCAGTTCGTCCTAACGCCACACAAATCCCACACGAACGCCAAGAAGGCATG
CGAGGCCAACGGTGGCACCTTGGCCATCGTCTCATCTAAAGACATCCAGGACTACATCTACGGCGAGATGGTCCACACG
TACAAGAGCACATGGGGAAAAGTCTGGATCGGCCTCAACGACATCGCCACCGAGGACGTATTTGTCTGGGAGGATGGCA
CACAACTGACCTACCAGAACTTCGCCCCAGGGGAGGGCACTCAGAATACCAGCCTTGTCGGAGTCGTGCCCCACCCGAA
CGAGAACTGTGTTATCATCGATGTTCACGATAGTGGTTTATGGCGTGACTACCCGTGTGACACTTCATCTTTCCTCATA
GGCACCCAGGCCGAGCTGCATTCCTACGTTTGTCAGTACAAAGCTGGTAGTAGATAATCTGCTTGCTCACTCCGCTGCC
TTTACTGATTGCATTAAAACATACTTTATAAATAAAAAAGACAGTACTCACAAAAAAAAAAAAAAAAAATAGGGATAAC
AGGGTAATAANTGATANGGNTGCATCNCGACCAAGGCAGAGGCTACC
>Contig419 3593 reads, 763 bases
TCCCTACACGACGCTCTTCCGATCTAAAAAAAATAGGGATAATAAAAAATATTCGCATCCAAGACAAATTGTCTACAGA
CATGGCCAGCATTGTTCCCTCATTTCTCCTGATCATCTGCGCCGCACTGGCTTATGGCCAGGTTGTATACGACCCAGTG
ATTAATCTTTCTTTGCAGTCCTGCCAGACCTGTGGATCTCCTGGACTAGATGATTTCTGCATCAAGCGTTATGGCAGAT
GGGGTCAAACAGTACCAGCTGTAGGCAATTACGGCTACGGAACATATGGTGGACCAACAGGACGGCCACCTCATGGTTA
CTTTGGCGGTGTCACAGGGATATTCCCAAACTCATGCGTTACTCTCAGAAGCTATGCCGCAGCCATCCCAAACAGAGCA
CTGAAGACATCGACCATCCCCATCTACATACAGACTGGCTACTGGAGCTCAACAGTACCCAGGGTATTCTTCAATCCAA
CAGTCGCTCATTTCTTGCCTGTACAGTACCCACTTGACCACTATCTGGACAACAACGCTGACTTCCCCAATGGCGTCTG
GAACTACATCAACCCAAGCCGACCGCGCCAGAATGCCCTCAGGGTCGACAGCTTCCTCTTTAATGACAGGAACACCGGT
AACAAAACCTGGTCATACCAGTGCTACTGTGACTGGTGCCAGATTGCCCAACAATGCAAGAAAGGTTAAAACTGGCCAA
TAAACAGTGTGGATTCAGTTGAATGRMAGAGCGTCGTGTAGGGAAAGAGTGT
>Contig420 6921 reads, 1249 bases
AAAASTATTTAATTTCTAMAAATTCCCGATTCTAAAGATATCCATCTTCACATCACTATTTGTTGAACTGCGCCACAGT
TAAGATCAAGAAATGTATACAATTTTTAATGTACGAATCAAATAAATTGTCTTGTGAAGTTGTAACTATGATACTATTT
TAAGTGTAAGTTTCTTCTGACTTTGCTCAAACGATTAATTTATACGACTACTGTCTGTTATATTGTATGTACTGTCTGT
TATATTGTATGTTAACACTTCAAGGAGATGCAGCATCAAGAACCAACTTCTCATTAAAAATTGGGGGCAACAAACAATT
GCCTTCATTATGCCAGAGTTGTGTTTTCATCTGGGTCACAAAGTCCACAGAACTTGCGGCAGTACTTGTGTCCGTCAAT
GGGTCTGTGGCAGATTGGCAGCAAGGACTCGTTCATCAAGGCGCATGCGTGGAGGGACAGCAGATCACTGCAGTCGCTG
GGGTGGAGTGTGGGACAAGAGGTCTCGTCAGCAAAGTCCAAACAGTCATTGTCACCATCACATCTCCAGCTGTGGTCAA
TACAGCGGCCGTTCGGACAATGGAAGTGGGTTATTTCGTTGCAAGTGCAATTGACCTCATCACTGTGGTCAGGGCAGTC
AGCGCCATAATCACAGAGCCAGGTGTTAGGGATGCACCTGAAGCCATCTGTGCACCGGAACTGGTAGTCGGCACACGAT
TCAGTGCAGTTCTCCTCGTCCCACCCATTCCCACAGTCGTTACCGCCATCACACCGGAAACTGGCTGGTATACATTTGT
AGTTGTCACACTGGACGTTGTCAGGATGGCATGTCGTCAGGTGGCAGTCGGTCTCGTCCGAGAGGTCACCACAATCGTT
GTCGCCATCACAAATAAAAGCCCGTGAGATACATCTTCCATTGAGACACTCAAACTCGTGTTCTGACGTACATCCGGCA
GGACAGTTGACCTCATCAGAACCATCGTTGCAGTCCCGCCCAGAGTCACAGTAGAAGAGCTGTGGGATACACTCCCCAT
TGGTGCATTGGAACTGGTAGTCTTCACACGATGCTTGTCTCTTTATGTGCTTCTCTTCCTTCAGTCCAGTCTCTCCTAA
CAAGGCATAGTTCTTGTACTTGTTCTTAGTACACGCTGCCACAACAATGTACGTCACCAACAGAAACATTACATTTTTG
GACACCATTCTTCTGTGCCCCGTCTGAAATAGAAATAGATTACCCTGTTATCCCTAGCCTATAA
>Contig421 10379 reads, 669 bases
TATCCCTWTTTTTTTTTTTTTTTTAAGTGGAAAGAACAGTTTAATAATGAGGCCAGGATCTGATAGCGTTGTACAGAGT
GTTTCCTGGGCAGTCGGTGCCTCCGCCCATATCTCTGTGACCTCTGAGGACGTAAGCGGACTGGATCTTTCCGTTGGTC
ACACCGCAGCCGATGATGTCCCTGGCAGCTTGTTGGGCCGCAGCTGTCGGCAATTTGTTCATAAAGTTTCCAATGAAAC
AGAATCCGTATCCAACGCTGTTGTAGCCTTGAGTGTGAGCCCCGACCCTGTCCCAACCTCGACCTTCAAACACGGTTCC
ATCTCCACCAATCAAGAAGCTGTAGCCAATGTCAGCCCAACCATTGGTGTCCATGTGGTAGTTCTGGTAGCTCCTGACT
AATGCAGCACACGACGTCCGGTCATTACATTCACCAGCCTCTGAGTGATGGATGAAAGCGTAGTGGACAGGATTGGTCA
GGTATGAAAGACTATGCGGGGCCCGGGCCCCCCATTGCGCCCTAGTTACGACTGTTGGACAGGCTCCATACACCAGGCT
GATCTGTACAGAAACTAGGATTGAAATTATTGGGCCAAACATTCTAGTGTTTTAAGTTAAAAACCATCAAAACCCAACT
ATATTACCCTGTTATCCCTATTTTTTTTTTTTTTTTT
>Contig422 5200 reads, 742 bases
CCTGTTATCCCTATTTTTTTTTTTTTTTTTCTTGTTCAAATAAGGTTTATTTTATGAATCGATAGAAGGTTTCAAATTC
ACATCTTTTTTTTATGACAAACTATTGATGAATATGAAGTATTCGTCCATATCAATTTTTCTGTCATTGTTAGAATCAA
GTTTTTGCATTAGGCTTTTGACTTCAACCATATCAAGAAACGTGTCTCCGTTAATGTTGACAGCTGTGAATAGCGAAGG
TAATAGGCGTTCCGTGTTCTTGTCGCAGCGTGCCAGTCTCTTCAAAAGGACGTGATAGGTCGCATTAGGCTTAGCGTTT
TGACCTAGCATGTATTTTACGAACTCTCTCATGTCCAAATGTCGACTGCGATCATCATCGAACCATTTGAAGCATTTGG
CATAAGCATTATGAACATCATCAGACTGGACCTTTTTGCCTTTTTGTAGTTTTTTTCCCTGCGACACGCCAATCATGAC
GAGTAAAAATATGCAGGTACACTTCATTCCCTTTTTTTAAAGAGTGAATCGATGAAGTAAACTTGTGTGGTTTCAAGTC
GGTAAAAGCCGACTTCTGTCACTGTCACATAGGGTTGCCAGATACCTTATTTGAAATACTTATTAAGACCACGACAAAG
TCAATGAGACTTTTAAAAATAATTCAAACTGGCGTCTAAGCATAAATACCCATCAAGTAATATAAAGCTTTATATGTTA
CTGAGCCGACTCAGTATTGATCCAGGTCAAA
>Contig423 5272 reads, 638 bases
TGTTATCCCTATTTTTTTTTTTTAAAAAAAGAAACACTTGGTTTTATTTAATGAAAAATAAGGCTACAATGTCTACAGT
GTTTATGTTGCTAGAATGAGACCAGCATATGAGTTTCTTGCTTGTTCACATCGCGATGCAAGAAACTCCTTCAGTCCGT
ACGGCACTACTTCCCAGAAGGGAGATAATTACAATAGCTAATACGGCAGCAGAAGTGGGCGTGGTGGTTATCTGGCTCT
AGGCATGCTTCTCGCGGGGCGCAGTCTGCTTCGAACCACGATTTTTTGGGGTTGAGGTTTCTGTACATCTTTCTGAAGC
GACATTCCTCCCCCTTGCTGCAGACACTGATCACGGCACTCATGATACACTCGTAGACTGTCTGACCACGACACGACAA
GCACTTGAGACCATCAACTATGGTCAACGCCACTACGAACGCCACAACTGCACCGGCAGCACCCGCGCTGTCTAGCAGG
CCCATTTGTTGTCAAGCTCACTATATCTGACGTCGTGCCTTCTCCTCGCGCTGCGTGTCTAGGCTGGATGGAGGAAGAG
ATAATGACACCGTCGCTGCTGAACTGTCCATGGGAATATTACCCTGTTATCCCTATTTTTTTTTTTTTTTTTTTTTTTT
TTTTTT
>Contig424 5578 reads, 1158 bases
TACGTTGTTACTGCTATGGTGACGTTACTAATAAATAACAACATCCATGGCAGAACTATTTTTAAAAAAACAGCAGGAA
GCACAGCATGATATCACTTCCGTAAGATGTGTTACTCTCTAATCCAGTTGTCTGTGTCAACACAGTGTCTATCTGTGTA
CTTCAAATCAGATTAGACGTGTCGATAGGTGACCAACTTGTCGATAGGTGACCAACGTGTCGATAGGTGACCAACGTGT
CGATAGGTGACCAACAGACAACAGCTGGTGTCCCATGACCTCAGGTCACCATGGTGGACAGCTCGCCCAAGAGTCATCG
CGTGTCTCTGGCCTACATGGAGCTGACGGAGTTGCCCATTGACATTATTGCCCAGTACGGCAACACAATCATTGAGCTT
GACCTGAGTCACAACAAAGTCTCAGACCTCCGATTCCTCATCAGCCTGCCCCGCCTCCAGAGCCTCGTTGTGGATCACA
ACAAAATCTCGTCCCACGTGAAGATGCCGTTGTGCCGCCACCTGCAGACCTTGTGGGTCAACCATAACAACATTCAAAA
CTTGGGTCTGTTCATCACGAACGTGGCCAAACATTGTCCTAACATCAGGATCTTGTCAATGATGAACAACGAAGCGGCG
CCGAGTTTCTTTAACGGTGGAAACTATCAGCAGTATTTGGATTACAGGTATTTTGTTATCAGTAGCCTCCCCAAACTGG
AGGTACTGGACTACAGCGCAGTGACCCCTGAGGAGAGGTCAGAGGCCAGGAGGTTATATCCGGTGTCTATTGTCCAGCC
CGTCAAGTCAGGCAAGCGAAGGAAGAAGTCAAAGTCTTGACGTCACAGCAACCATTCAATCATTCGCGTCATCGATACA
TTTAATTTATGATAATAAATTTAACAACAAAGTTACATCGATAAATAGAATTTTACAATAACATGTGCAACACTAATTG
AAGTTTCTACAACACATGCAGGCAAACTATCTTCATTTAAACTCTTATGTATGCTTCATATACTTTCTACAACATTGAT
GTATGTTTCCAATATTCATCCACAACACATATGTATGCTCTATGTGTAAGCTCTATGTAGTTATCCACTGTATCATTTA
TGCATAATTTAATCATCACCAMAAGCAATGTGATTAAASATCRGAAGAGCGG
>Contig425 4026 reads, 708 bases
AAAAAAAAAAAAAAAAATAAAAATAAAAAAAAAAAAAAAAAAAAAATAGGGATAACAGGGTAATAACGGTGGTCACTTT
AGTAGCACATTGACATTACAGAGGACTTAAAGATAGAACGATGACCCTACAAATTATTTTGACCACCTTGTGTGTCCTG
CCTTTGGTCAGCTCATTTTATATAGGTCATGACTTCGACACACCTGATCAGAAAGTTCTTAGAAGAAACGCCTTCGGAC
AGGTCCAAGCATTTGATGTCTCACACGAGCGTCGTCTAGTCTCCAATGGTTACGGCGGTCTGAGGCAGGTCAACGTCGT
GGAATATTCTGACCCTGACACCTATTACCCACAACGTCCTCTTATTGGTCCTCATCCGGTCGGACTCCCTCTTCGGCCC
ATTTATTCTGAACCCATTCCGGTGCCGCTCCACCCAGGGGGCCACTTTCTTCCCCCTTATTATCTGCACAAATGACGTC
AACCGTGAACAGTTGCTTGCGTCACTCTAGATCATTCCTGTTGTTATGGATACAAATAAAAGGACAGTCATCCTCATCG
ACGCAATCTTATTTCTAAGTTCATATTGTAAACTTTAGCCTACAGTTTATCAAACATGTGTTCATGTCATCAACAGGGA
AAATAAAACGTGTGAAATTTTCAAAAAAAAAAAAAAAAATAGGGATAACAGGGAGACAACGCCGCCCTCATCATCG
>Contig426 4914 reads, 645 bases
AAAAAAAAAAAAAAATAGGGATAACAGGGTAATCTTCAGAAGAGCGTAGCTGACGAGAGGGTTTATCTCTACGTCACCA
GAACCCTACCACCAGACACCATGATGCACTCCTTTATCTTCGCGTGTTTATTCCTTCTACTTGACCTCACCAGTTCCAT
CCCAGTCACCACCGTCAACAAATGTCCCAAACCCACGGACTTGAACCCAGTCCCACCAGCGTTTTTCTATTCTCACCCC
GAGGACTGCCAGTACTTCTACACGTGCGCCTTCGGTACAGCTTTCTTGATGCAGTGTCCGACCACCACACGTTTCAGTG
ACGTCTACAAAACTTGTGCACTCAAGGATTCCATCTACGACACGTGTGAACCGGAAAAACCAGCCCGAGAGATTCTCAC
GCCACGCCCAAGTTTTGGGAAACCGACACTTTAAGCCATCCTTGAACTCCATTGTGAACCCCTTGCTTGGTGCCAATGA
AGACGAATGCCCTATCCCCAGTATTTTGATGATGTGGAATTAAGTGCAAACCATTCGCTGAAGTGGAATGCGGCCCCAA
CCAGTGCCAGTGACAATTTTGGGAAAAACCTAGCCAACAAGTCCAAAAAAACCTAGATCCGAAAGAAAAAACGGAAGAG
CGGTTCAGCAGGA
>Contig427 6952 reads, 841 bases
CACWAATATTGACCAATGAATTGTTATCTCGCTTCAAACACTTTTTTTGTTAATGAAAACTCGCTGGCGTTAATGAGCG
CTTCAACGGATCTATTATCGACTGTGATCATTTGATTGTCCAAAACTATATAAATGTCGTCTGTTTGAACGGAGGTCTC
ATTATCTATGAAAAGCTTGAAACAAGACGTCTACCACTACCAACTAGAATGCTGTCGTTTATCGTTATCTTTTGCCTAG
CCCTTGCCGGAAGTTACGCTGCTACCCCCGTCACCTTGACAACAGCTGACAAAATTGCTTTTCTAAATACCCACAATGC
TGCACGCAGACTAGTCAACGTCACTGATCTGGGGTGGAATACAACATTAGAACTCTACGCCAAAAAGTACGCAGCCAAC
TGTTCCTTCAAACACAGTCTTGGATCGTATGGAGAAAACCTGTACGTGTCTTCACCGGCCGATGCGAATAACACTCGTC
TCGCTGTGATCTCGGTGACCAGATGGGTCAGTGAAAAGTCTCTAGTAGACTACTCTACCTGGAACTGTATCAGGAACGG
CACGTGTGGACATTACTCACAGGTTGTTTGGAAGACCACCAGACATGTTGGATGCGCCATCGTACACTGTGATCCTCTC
TTCGGCAACTTGGTTGTGTGCGAGTACTGGCCTCGTGGTAATCTTCTACCTGGCACGCCATATTGAAAATAATCAGCCA
TTCCTGATGATAAACCAGATTCGCCCCTCATTTTCATTTCAAACAATACTTTTGTTTAAACCTTTGAATTAATAAAATT
GCTAAATATTTAAATCTTGAAAAAAAAAAAAAAAAAATAGGGATAACAGGG
>Contig428 3319 reads, 1074 bases
TTACACACGACACGAGGGATCCTTTTATGGCGGGATGCTGGACTCTGTACTAACACTCAGATCCATCTTGACAATTGGC
AACTATGATTACGTAGTTGACTACGTATTTCATCAAAATGGAGTGATTGAGACCCGGCTCATGAGTACAGGTTACATCC
AGGTGACCCTTTTCAAGGACAGTCTGAGAGATTACGGTTTCCGCTTGAACGAGTGGCTCACTGGGACCGTCCATCACCA
CATGGTCAACTTCAAGGTCGACCTTGATATCGCCGGGACGTCCAACAGGTTTCAACACGTCGATATAGTTCAAGACAGC
ACGACACTTACACAGGATCCATGCACACGATATCACCAAACCAAAATAATTCCAAGGGTGATAAGAACTGAGAGAGAAG
CCATATTTGATTACAACTTCAACACTCCCAAATATCTGCTAGTCTACAACGAGGCAAACAAAACAAAATATGGCGTCAA
TAGATCCTATAGAATCCAGATGAACGGGATGTCACGTCAAATGATACCCAAAGGTTTGGGCAATGAGCCAAGTATTGCC
TGGGCACGTCATCAAATGGTCGTCACGAAGCACAAAGACGAGGAAATAACTGCAAGTTCTAATTATGGGATGTTTGATG
GATTCAAACCAGTTGTTGATTTCAGTCAGTTCTATATGGACAACGATAATATCGTTGATGAGGATCTCGTGTTCTGGAT
AACTGGCGGCATGCATCACATCCCTCACACAGAAGATTTCCCCGTGACTTCGACAGTGGGCAATCACTTGACCTTCTAC
TTGTTGCCCTACAACTACTTCCCCGAATGCCCGTCGATGGGGTCACGTGATGCCATGTACATTAAATTTAAGAACATCA
GTGACCCGAGACAGGGCATACAACTAGAAAGAAACGGTAACTCTAGAGCCCAATGTTTGACACCCCGCCCAACGCTGGA
AGAAGACATCGAGACGAACCCAGAACTTGTGTTAGAAGTTTAAGAAAATACGATTTTAATAACATCATTAAAGCAATTA
TTTTATTTAAAAACCAGAAAAAAAAAAAAAAAAWATAGGGATAACAG
>Contig429 5759 reads, 788 bases
ACACTCTTTCCCTACACGMCGCTCTGTTTATGTCTCGCCTATTCACGGGCCCACACATTTACTGTTTCCCCCAAGATTG
CTGTCTATCCCACAACGACAGCAAGTTTGCCTACTTTACACAACAACAAACTCAGACGACGATCATGTTCAGTTGTTGA
GAACGGGCTGTGGAGACCTCGAAGAACATAACCGTCGGGGATGCGATAGTAAACTGGGTAGTTGTAACTATTTAAATAC
TCAGTGTAAAAACAGCTGTATGTGACGTAACCAGCAGGGGCACAGCATTGGAATTCAAACATTCGGTCTTGTGTTGAAC
TGTCATAGGTCGTCCTTATGCCCGTCATGACGTCCTCGTTTGGACACTGGTAGTTGATATACGATGCATAAGAATTGGC
GTGGCCACTCCACTCACAGTTGCTGAGGACGGTCACAGTGTCCGTCGGTAAGGTGCTGCAGGTGAAGTTCCACCGGTTG
TCGTTGACATCGCTCGCCGTGTAATGGAAAGACGCTTTAACGATTTTTTTAAAGCTAGTATTAACAGGACAGGTAAAAG
TCCATGGGACGAGCGGGTCTGTCATCCAACTGAAGAGAGAAGTTGAACCAGGAAAATAGGCGATCAAACACCATAGAGC
CAGTAGCTTACTTGTCAATCCGGTCATGACGGTCTAAATTAAATACTTTACGTGAAAGATGAATCGAAATCTCGTGTTG
TCCAAGCAACTTTGACAATTGCTTATTATTACCCTGTTATCCCTATTTTTTTTTTTTTTTTTTTTTTTTTTTTTTTT
>Contig430 6252 reads, 1340 bases
AAAAAAAAAAAAATTGGGATAACAGGGTAATAACATCTGACATTGGCCCAGTGCTTGTAATGAGTTTGCAGTCGACGTT
CTGTAGAAGTTTTCAAGGGACATCTTTGGTCAACACTGAACCATGGCACGATGTCTATTTGTACCTGCCGCCTATCGCC
ATCTTAGGTCAACACTGAACCATGGCACGATGTCCAATATTTCAAGTCTTTTTTGTTGGATTGTGCGTCACATCCGGTG
TTTATGCACCTAACTGCGATATAAAGCATTCTATAGATATCATAGAATACAGAGGACCACCACCTTTTTCCATAAACGC
TACTCTCTATGAACCAGGAACTCGGTACAATTGGTATACGCTACGTTGGGGAGGTAACGATGAACCTATCTTCAACACA
TCAAATTCAAATATAACATACTTGGGTAGAACTCTTATCTTTAAAGAATTCGACTTTAACGACATCCCTCTTTACAAGT
GCAAATACGCCATACCCACAGACCGTAAACCACAGCTATTCGTGATAATTCGCAAAATTAGAATTGAACCTGGCACTCC
ATTAAATTGGGAACATTTTTACAATGGAAACGAGCTCCAGTACGTAGCTCTAAACTGCACGATGACTGGTTACGTGGAA
GGAGATGACATAGAGTACAAATGGGTAACTCCAGACGGTTATCCGATTCCCTTGGACCCTGGACGACTTTATGTGGATC
TCCGCGGAACTCTCCACTTCACACCGATTAAATTTAGTGACGAGGGCATAGACTATCTGAAGATGTATGTGTGCCACGT
GTTCAGTGCCAAGTTGGGAGCCGGACAATACGGAAGCCCCGTTTCTGCCATTGTTGATGAATATGATAGAGATAACGTT
GTCCGAGGACGCCCTTGGCTGGTGTATAGGAGTCCCAATGTTACGGTGGTACGGGGTAAGACTCTAATACTGGAATGTG
TCTTCCACATACACGTTACAGGTCAGCGGACTACCTACATCTGGCAAATTCCCAGCAACATCAACCTCACGCAGACCGA
CGGGAAACGTGAGATCCTGTTCAGTGGACGAAGATTTCGGATAAAGAACGTAGCCTTTAGCGACAGTGGAGACTATCGC
TGTTTTGCCAATAATGCATGGGGCACCTCATCTATAGATGTAAATCGTCCTAACAATTCTTTTCATGTACATGTCACTT
GTCCTTAGTGACACAGACACCTTCGTCTGGTCAGGCGGCCGTGGCCAAAGATTATAGTTTATATTTGAAGAAATAAGAA
AATGTTCTTTTGTCTATCGTCTTTGTGTCAATTCAAATACAAAATATAAAATTTCACGTTACAAATAAAAAAAAAA
>Contig431 13128 reads, 547 bases
ATATTTAAAWAAAAAAAAAAAAAAAAAATAGGGATAACAGGGTAATACTACTTTGTGTAGCGCTCTCCTCTAGCGAACT
TGAGATCTTTTATAAACGACAAGCACATCAACGTTCTATCTGCATACCTCCTCTGACAAAACAAGAAAATGAACAAGTC
CATCATCGCTACTCTTGCCGTTATGGCCATTCTTGTTTCCATGGCAATGGCTCAAACCCCCACTACTGCAGCAGCTCCA
ACAACAGCAAATGCTACTGGATCATCAGTATCATCAGCAGCATCAGTATCTGCTGGACCAACAGTAACTTCACCAGCAA
CACCCACAACAACACCAAAGAATGCATGTGGTCTACTTGAATCATCTGGCATTCTGCTGATCATGGCTGCTTTCTTTAA
TCTGCTGTACTAAAATATGCTGCTCAAGTAAAGATGTAGAGTTCATGTTTGTAAAGTCTCAAGTGTTCAGTCATTAAAA
AAAAAAAAAAAAAATAGGGATAACAGGGTAATCCGAGAGAACATCCTCGCCCACGAGTTCACCCACACCATCC
>Contig432 334 reads, 247 bases
CACTGCCAGTCTTTCCTTTCTTCTTTTCTTGTTTGTCAACTTTTGGAGTCTGGCCACGCACCTTGCCAGCACGAGCCAA
ACTGCCGTGCACTTTACCTCCAAGCAATCGCAGCTCAACGTTTAAAGTTGATTCATTCCTGAATGTGACCAGCTCACAT
GTATCTTCCAAGGGTTGACCTTCATAAAATACTGCCATTTGTTCCATAGGGAGACCCTCATGTTCAGTGAGATCGGAAG
AGCGTCGTGT
>Contig433 23 reads, 150 bases
TACGACTCACTATAGGCTAGGGATAACAGGGTAATATTCATTTCCAAGACCACACAGAACAACACGCGCCATGTTTATT
TTGGTCCTAGGAGCTCTCTTAGCCTTCGCTAACGCAGCACCAAGAACATGTCACGGTGACATTAACCAGCT
>Contig434 4157 reads, 542 bases
TTTTTTTTTTTTTTTTTTTTTTTGGTTGTGGGGTATTCCTCTATTTTCGTTCGATCTTAAAGTCATAAGTCATTAGGTC
ATGATGTCTTCATATCAGTTTAGGAATTGACAGTGAATGTGATTTTTCTCGTCCAAGCCTTTTCCACCCATTGAGTTGC
AAGTTTTGATGTACTCTGCACTTCTGCGGTCGTTATGGAGGTCAACGGCCAGCCCCTTGTAATGTAAGGAGGTACAACT
ATGACAAGCGCCGGCCAGTTCGTTTACAATGACCGATCCCCTGGCGACGAGTGTGGTCAGGTAGGAGAGGACACTGTGG
CTGAGGCAAACACTGCCCCCTGGGGCGCCAGGAGATTTACACTCTGAGCAGGTGTAGCGAGATCTGGACGCAGCGTTAC
CGTTGCACATGTCCCTGATGTTGTTGTAGGCGTAGGCGTTGTCCGCCACACCAGAGGGGTGCCTGGTGGCCAGACGAAG
GACGCCGGAACCATGCTTGGTCAGAAGTCCACATGCCAGTGTGACACTGGCWGCTGGACAGATTACCC
>Contig435 49 reads, 327 bases
CTCGGCATTCCTGCTGAACCGCTCTTCCGATCTGGGGGTGGTTAGTTTATGACAGAAGCCAACTGTTGAAACAGAGTTT
CGTTAAATCCTGCGTCACCACGGCACCGGACGATGGGATTACAGCATTCAGGGTACAGCTTGGTGACGTCATGGTWTTC
GCTCATAATTTAATTTTGGATCAATGTAAAAAGAGGATTTGATGATGGTTAATTATAAAATWAAAAAACAACAACCCTA
TTATAAAATACTTTGTGTACATTTCAGAAAGTTTAATATTTCGTATTTATCAAACAAGTACAAGTTAGTTGGGCTTTTG
AACAAATTCAG
>Contig436 11523 reads, 877 bases
CTGTTATCCCTATTTTTTTTTTTTTTTTTAAAGCGTGTTTTAACAAACATTGTTAAAAATTTATTTTACTATAAAACAA
AAATGGATTTCTTGGAAAGAGTCCAATGTGAAACAAAATGTTGTCACTCAACGTTATTTCTAGAGACAATGTCAGTGGG
GGAAACTGAATAACAGAAAGATATTTAAAGCCTTGCAATTAATCATTTCAACAAAAAAGCCTGGACGTCATTTCTATTC
GTAGCCAGCAGCAGCGTACGTGGTGAAGTTGAACAGGATGACCTCCCCTTTCTTGGGGACGTAACTCGACACACCACAT
TCAAGAGCCTTTCCACCGCTGCTAATTTGCCAGAAAGTTTTGTTGGGTATCGAGCCCTCCACTCCATTGATGCTGTCGA
TGAAGTAGCCGAGACCGGCGAAGTAGGTCGACTTGAACTTGAAGCCGTTCACCAACTCTGTAGCCCTCTCCAAGAAAGA
CAGCAGTTCTTTCTGTGGTTCGCCGGTGATGGCAGCGACGATATCGAACTTTGGAGTCACGAGTGTGTTGGTGGCCCTT
ACCGTGACGTTTATGGCCTTACCACACAGCCCGCAAGGGGGCTGCTCCAGTTGACATTGGGTTGCGTTGCCCTGAGTCT
GGTTGGCCGGTCGTGATCCACCATGGTATCTGTTGTTCCATCTTCCGGGAAAGATCGGTCCTCTATCCCTGTAACGACC
GCCATGTGCAGTCACCACGACTACAAGACAAACAAAACTGATCAGAGTTATCAATCCACTGAACGCCATGTCGTATCCT
TAAAGTCTTCAGTACACAACGCAGCAATACATCATTTTCACTTGTACCTATATATTACCCTGTTATCCCTATTTTTTTT
TTTTTTTT
>Contig437 833 reads, 616 bases
AGATCTACACTCTTTCCCTACACGACGCTCTTCCGATCTAAAAAAATAGGGATAACAGGGTAATCTTTTTTTTTTGTAA
CTTCCGGCCGAAGAAAATGGGCCGAGTTATTCGATCCCAGCGTAAAGGTCCAGGGTCAGTTTTCAAGGCCCATACTAAA
AATAGGAAAGGAAAGGCTGCATTAAGAGCTGTAGATTTTGCTGAAAGACATGGATACATTAAAGGTGTCATTCGTGACA
TAGTTCACGATCCTGGTCGTGGTGCTCCTTTGGCAAAGGTACAATTTCGTGATCCATATAAATATCGTATGCTCACTGA
GACCTTCATTGCGGCTGAAGGGATGCATACTGGACAGTTTATTTACTGTGGTAAAAAAGCATCATTGCAGATTGGCAAC
ATTCTCCCTGTTGGTATGATGCCTGAGGGTACCATTGTTTGCTGTCTTGAGGAGAAAAGTGGAGATCGTGGAAAGTTAG
CCCGCACATCTGGCAACTACGCCACTGTCATTTCCCACAACCCAGAAACAAAGAAAACCAGAGTAAAGCTGCCATCTGG
TTCTAAGAAAGTTGTTTTTTCTGCAAACAGAGCAATGATTGGTATTGTTGCTGGAGGTGGGGG
>Contig438 87 reads, 200 bases
AAAAAAAAAAAAAAAATAGGGATAACAGGGTAATATAAATATGAATTCTTGTGTTTGAACTGGTCAAAGATGGCCTACT
TGTTCATGGTGCTGCTGAGTGTGTTGGCCTTCACCACCAGTGAGGTCCTTGACTTCAATGTACTTGAAGTCAACACATT
CACCAATCTCGACATCGACATAWACGGACASAKCGTCGTGTA
>Contig439 12822 reads, 844 bases
CCCTGTTATCCCTATTTTTTTTTTTTTTTTTTTTGTGAGAATAAACATTTTATTTTCTTATCATTTCTATACAGTTCAA
TGCTATAGCAGGCGTCAATGGCGCCCCTGACATGACTCAGGGTCATAGGTCATGCCAAAATACGTTAAACACAACACGC
GTCCCCATAGGACACAGCCAGAAATCAGATGTCCAATCAAACTCATTCTACGATAAAGGGATCGTTTTGTCTCTCTAAA
CTAGCACACAAGCCCCGGAAGTGTTCAGGTATCGGCGGGTCATACTTGTAGCACTGGCAGATGCACTTCCCCAGCTCGA
CCCACATCTCCTTGACGTGCAAGTCTCTACAGTACTGGCAGTGCGCCACGGCCTGCTCCATGAGGTCAGGCTGGTCAGA
GCTGGGCACGGGGGGTGGGTGGAGCTCACGTTCCGCTGCTGTGTGCGGCACGAGGAGGCCTACAAGAGCTGTGACCAAG
ATGGCCGCGACGGGCGACCCGAGCCCAAACATCATATTTAAAAGCAGTGATGTGCACGAGCTGTTGTTATGGTGAATCT
AGATGTAACACTGTCCAGTGTCCAATGAGTGTCTAGCGAAGGATAACAACCAGACGCAGGGGACGACAGGCAGACTATG
GTTGGCTGATTGAGATGAACACTCGTACCACGTGACTACAGGGGGTAGAGCTTAGCTTGGCTTGTTTATTTAAAATCTT
GGACCGTCTCACTTTAACTTCATTGAGACAATGTCTDTTGAAAATGACGCATTAAAAAGTGGTTGCCTAGGAATACAAA
AATAGTCCCCTTTTATCCCTWTTTTTTTTTTTTTTTTTTATTACCCTGTTATCC
>Contig440 7001 reads, 1036 bases
CCGCTCTTCCGATCYGGGTCAGTCCGGACCACCGGGGACCACACCCAATATTCAGTTGGTGTTTGAGGGGCGATGCTGG
GACTACGATGAGACCAGATACAACGGCCTCCTGCCCAGGGTTCAGACGGACTGTGACAACTTGTGGAAACTATTCTTCA
ACTCCTTCTCCTACAACGCCCCTTGTGCGGTCAACCAAAACTCTTACAGTCCATTCCTGCAGGCGGCCAGACAAACTCT
ACCAGAGAACAAGGTCATGTTTTGGTCCGGAGTGTACAGTTTGGCCCACAGGTTCTCTGAGAACGGCGTCAGGTACATC
ACTTTGGAAGACATTCTCATCGGCTACCTGGCCAACTCACTCGTCTGGTGTGGCCAGGAGAGCCCCCCAGGAATGAACT
ATTCCCGATGTCCAGATTGGACTGATTGTCCGAGCGAGGCCAGCGAGAGTTTCTGGGCAGGGGCTTCCACGGCGTTTGC
GTCCGAAGCAAAAGGCAACGCGACTTTGATGGTAGATGGTTCAAATCCCGGTAAGCCAGCATACAGAAGAGACAGTTTC
TTCGGCAAGTACGAGTTGCCCAATTTGAACATGCGCCTGGTTCCCGCCATCCACGTCATCGTCGTCCACACACTGGACA
AGCCCAAGATGGAAACTTGTGGATCTGGATCACTACTTGACCTGGAGAACGATGTCTTGGCGAGGGGAATATTGTTCAC
GTGTGATGACGATCCAGATTCAGTGATGCATCTCCTGTGTGCTGACCAACCGGACAGTCGTGAGTGCAAACTGGCCACT
GCCCACGTCAACGCTGAGCTGCCTTACACCAGTGTCCAGCCAGGATTTAACGTATTGCCAGATTTCTTCGGCTGACCAC
AGTAGCGTCATGGGGGACTTTGCGTCTCAGTGCCAAAGTTCTAAAGACCGGTTTGGTCTAGTAATACTAATTACATTAA
CAAAAATCTTGTAAATTGTAAGCCTTCGGTATTAAAAACGTTTCATTGCTTTTCATGAAAAAAAAAAAAAAAAATAGGG
ATAACAGGG
>Contig441 444 reads, 169 bases
CTCTTCSGATAACWGGGTAATCTTCTTTTTCACCCAATAGTATAGTGAAGCCGAAGCACAAAGGAAATGCAAATCTTTG
TGAAGACCCTGACGGGCAAAACTATTACCCTTGAGGTTGAGCCATCTGATACTATTGAAGAGCGGTTCAGCAGGAATGC
CGAGACCGATA
>Contig442 299 reads, 356 bases
TCCCTATTTTTTTTTTTTTTTTTCAAAGAATTTAACTATTTATTTCAGACCAATTACTTGGTCTACTTTTTATGATAAT
CTTACAAGCTCACATCTTGGTCTATGAACCAACATTGATTCTCAACCATAGCCGGCTCAACGGATCGGCTTACTATGCG
GGTGCGTTAGCGAAACACGAGTAGCGCGTGACGTTGTCCACGATGGCGCATGTGCAGTTGGTGTATGTTGTATTTTCAA
TGACCAATGAAAAGGTTTGTCCGGGGTTGAATTACCCTGTTATCCCTATTTTTTTTTTTTTTTTTTAMATTGAGATATG
ATGTATTTGACACTAACAAAAATCAGCAATACACAAAAAC
>Contig443 6058 reads, 593 bases
AAAAAAAAAAAAAAAAAAAATAGGGATAACAGGGTAATATGTTTGGCTCTGAGATCCTATACTCTCTATACTCTTACGT
CTTACCAATCAACTAGTTCACTGAAGGAGATTTCTCTGCCCAAGATGTCAGGCTCACTTCTGCTGCTTGTCCTAGTCAT
TCTGGCACTGTTAAGCAATGGCCGCGCCTTCCCGTCGTCCCTAGAGGAATCCTACCAGACGGACCCCAAACTGTCAGTC
GACTCGGCGTCGTACCCAGGCGTAATTCTAAGAGCTGCCGAGGCCCCCCTGAGGGAGCTGCTCCTGGAGGCGCTTCTCA
ACGATAACAAGCCCGACGAGGGGCGTAGGGAGAGGCGTCAGTCCAAGTACTTGATTAGTGTTACCGGCAGATAACTCAA
AGGGAGAGGTGCTAGTCCAAGTACTTGATTAGTGTTACCGGCAGATAACTCCAGAATGTGTTCAATCACTGATTTACAC
TATGTACATGAAGAGCTTGACTTTAACGATTGCTGTTTGATTTTATTTTTATTTCATTTTTATTGAAATAATCAATAAA
TTTTAAATGAAAAAAAAAAAAAAAAATAGGGATAACAGGG
>Contig444 8727 reads, 1062 bases
AAAAAATAGGGATAACAGGGTAATTCAGTTGAACAACCTTCAGTGCAACAACCTTCAGTTGAACAACCTATAGTACAAC
AACCTTCAGTTGAACAACCTATAGTACAACAACCTTCAGTTGAACAACCTATAGTACAACAACCTTCTGTTGAACAACC
TATAGTGCAACAACCATCAGTTGAACAACCTTCAGTGCAGCAACCTTCAGTAGAACAACCTTCAGTGCATCAACCATCA
GCCAACCAACAACCCTCAGTTGTCGCCGAACAGGCTCAAGTTAACTTGGACCCTGTGGTTGAGCCCAAACCTGCTCCTG
GTCCACCCGTTGACACAGATCCACCGACAACAACAGCGACCCCGACGCCAAAACCAAGACTTTGTCCAAAACAAACGTT
AGCAGACATCATCTTCCTTCTGGACTCGTCCAATAACAACGGTCTGGCCAATTTCCAAAAGGAAATGAGGTACACTTCG
GACTTGACGAGGCTGTTTGACATCGGTCTTCAGGCGACTCGTTTTGGCGCTGTCACATACAGCTACAGCCCGGTCAAGC
TGTTCGACTTGAAGACCTACTCTGACGCTAGTGCCATGGAACCGGTCCTTACATCTGCCAGGTATTTGAACGCACAAAC
GTACACCAACAAGCCGCTGGATTACGTCAGAACGAACGCCATGTTTGACACACCGGCCGGTGGACGACCTGATGCCAAG
AAGTTTGTCATCATGTTGACGGATGGCATTGCTCTAAACTTGTCTCTTGCTAAGACGTCCGCAGAGAAGCTGAGGGATC
TTGGCGTGCAAGTTCTGTGTGTCGCCATAGGCAGTGAACTGACGGATGCCGTTGTCCTCAATATTTGCACTGAGCCACG
CAACGTCATCAGAGCAGCCAGTTACGATGGATTGGGAGATGCAACCACAAGCCTCATCACACGCATCTGTGACCTCACT
GAAGGCGTGTAAGGAAGAGCTGTTGCTATGAGGCCGAAAAATCAAATCTAGCCGAGGACGCTTTTTATAAGGAGAGCTG
AACGATTCAATAAAAATATTATGGCCAAAAAAAAA
>Contig445 8678 reads, 568 bases
TAGGGATAACAGGGTATAAATTATTGTATATCTCCAGTTTGACACCAGGTGCTCAGAGAGAAGGAATAAAAACACACCC
TTCGTCACACATTGACAGATGAAATTGTTGGGGACCATGGACAACACTTCATGTTTTGTGTTCATTCTTTTGCTGCTGG
CTGCCTGCTGCGTCATAGAAGCCCAAGAAGGCACCCCTTGTATTACGGGAGCCGTAGAGTGTAACGACCCCGTAAACTT
TGCCAAGAAGATCACGTGGCAACGAAGCACGCAATGCTGCAATGGCCACGGTTACCCGACAATTGTGTTGACCGCTAGC
GGCACCAGAAAATGTGTCTGTCAATGACGCGGCGATGCAGGTGATACTCGTTTGACCCGAGAAGTCGCTTGGATCAATA
CACACCAGAAACGCCCGGTGCACCTCCTAAGTAAAACCACAATTCATGTGTACGGAAATTAAAGTTGCTTGAATCAATA
TGCAAAAAAAAAAAAAAAAATAGGGATAACAGGGACACCGSCATGTCGGACTTCGAGTTGGTATGAATACAGATGGCAG
GTTTACCTCGATTAC
>Contig446 5834 reads, 718 bases
AAAAAAAATAGGGGTAATATTCCCCCTATTACCCTTGAACCTGTCCGTTCAAGATGGCGTCCCTCGTTTCAAGTAAAGT
TAGCCGGGTTACGCTGCTCTTAAAATCATGTTCACGTTTGATGGCTGTCACTCAAAGAAATTATGCCGATATGGCCTTC
ACATTTGCTTCTCCTTATGATGTATATTACAAAGATGCCAAAGTAAAACAAATAGATGTTCCAACATTTAGTGGAAACT
TTGGTATTCTTCCAAACCATGTTCCTACTTTAGCTGTCTTGAAACCAGGTGTTGTCAATGTATTTGAAGAAGATGGAAC
TAATAAAAAATTCTTTGTTAGTAGCGGTTCTGTGACCATCAACGATGACTCATCAATTCAAGTCTTAGCTGAAGAGGCA
CATCCATTGGACAGACTGGATGCTGCGGCGATCCGTGAAGGTCTGAGCAAAGCCAACCAAGAAGTTGCATCTGCATCAA
CCGAGGCAGCTAAAGCAGAGGCCCAGATAGTTGTTGAATGCTATGAGGCATTACAGAAAGCTCTAGAGTAGCAGAAATT
GACTAATTTATATTAATATTGTTAGCTACAGTGTGAGTTGGGTCGTTCTTTTTTTGGATGATGTTTATATGGGGTCACT
GAGGACACTTTAAAAATATTTGTACGCATCTCAGAAGTGTATTAAAAGCATTCAATGTAGACAATTAAAGTAAGATTAT
ATAAAAA
>Contig447 5272 reads, 526 bases
GTTATCCCTATTTTTTTTTTTTTTTTTTGATAGTTCAAAAGTTTTATATATTCAGAAATTTAAATGAGATAGTATTTCA
AATCCACGTGTTATTTTCTTTGAACATAAAAGCAGCATCCAACATTGTAACTCATGGGCAGTTGGTACAAGCCAGGTTG
CCATTCATACACTGACATCTGGAGCATTCATCAGATGGGACATATTCACTATGTTTGTATTTCCGTCCCCGTATCCGAC
AATTCAGTGGTCTGTACCACGAACAACCTTTCTTGGTACATGCGAACCCACCGTCCATACACATACAATTGTTGCAGTT
GTCAAGAACTTTTCCAACCGTCTCACCGACAGCAAAGATCCGTCCATTGATCTTACAGTATGGGTGTGATAGCGCAAAG
ACAACACTCACACAGCAGACGATCAAGGAAACACTAGCGACAATAGATTTCATATTTAAATGGCTATTCACTTTGTGCC
CACAACGACAAAGATGAGCAAACAACGAGTTTTATTACCCATAAAATTGTTG
>Contig448 9583 reads, 715 bases
AAAAAAAAAAATAGGGATAACAGGGTAATACGCTGTACTCGTCTTGCTAGGCCACCTGTCACCACAGACATTTGTTAGT
TAGGTCTTCCTATAAGCAAAAGAAGAACTTCTTGCAGTGATGGAAATGAAATTCTTCGCAGTTGTGGCAGCTTTCATTT
GCCTGAGTTTGACCGACTTCACAGATGGAAGAGTCATCAAACAAGGGGCGGGCTGCACAGTTGAAGGGAAATATTACAA
ACATGGAGAAGTCTTCTCTCTAGATCGAAAGTGTAGCCTATACAAGTGTGAAGACAGCCTGTACCAAGCCCATGACGAT
GGCTGTGATTTCGAAAATCAGTGCCTCGCCATTAATACAATTGCTGACGTAAACTGCACCACATACCATTGTTCGAAAG
AGGAAACCTCTGACGAATACGTCCAATATTTTGTCAAACCAATCAAATCCCGTTGCCAGGACAGGCTCGGTATGTGTCA
CAAACCAGGAGAGTACTTCTCTTACGTCATCGGCGGACAAATATTTGACCGTTGCAACTGTGATACTGTCAGTGAAGCG
CAACAATCAATCGTCAAATACACCTGCAAGAACTAACTGAAAGGAAATGGCCATTGGGATGATGTGTGTAGACACGAGA
CTACACTATGTTTATTATTAACATCAATACAAAAAACAATCGAACTAACGGAAAAAAAAAAAAAAAAAATAGGGATAAC
AGGG
>Contig449 3928 reads, 1184 bases
GGGTAATCGACAAATGTCAAACTCCTAACCCATGTGGCAATGTGGTTTGTTTAAATAATGGTGTCTGCAAGGTTGGAAC
TCAAGGGGACCTCACTTGTGAGTGTCCTAGTGGCTATAGTGGATATTTCTGTGAACTCAAGGTTGACTGCAGCAAGCTG
ACTTGTTTGAATGGAGGACAGTGTGGCATCATTAGCAACCAGGCAGTATGTGATTGTCCTATTGGCACATCTGGGGAAT
TCTGTGAGAAAAGAGCAGCTTGTGGTGCCAAGGAGGCACCGTGTAAGAATGGTGGACAGTGCACAGATTCTGAACAAGG
ATTTGTTTGTAGTTGTACCTTTGGTTGGACTGGAGCAACTTGTGATCAGAAACGAACATGTGCTACCAGCCTCATTCAG
TGTGAAAATGGTGGTCAGTGCACTGACACTGCAGGTGGAGCCACTTGTAGCTGCCCTCCTAATTACACAGGGTCTTACT
GTGAAACTATTTTGGATGAATGTGGTGGCTGTCAAAATGGTGGTGTGTGCAAAGTTCCAGAAATTTTCCCTATAGACAG
CACAGAAAAATCATGTGCTTGCCCAGCAGGCTTCACTGGAGCACTTTGTGAAACAGCTTCAGACTGCACAATTCCTTGT
TCTCCACTACTGGGTAAGGGAGGCGATCGTTACCAAGTGCTTGTCTTCCCTGATTTGACATCCCCTAATCATGTGTATG
TTTGCAGAGAAGGACTGCTTCAGAGAGTTAATTCTTGCCCTGATACCAGATACAACCTCTACACAACTGGCTGTCTGAC
CAATGACCAAATGATTCAAGCCACACTAACATGCCAGAATAACTACTACCCTCAGTAGGTGGCTAGAACTGGAACAGTG
AAAGATAATCTTCAATCCAAGAGTTTAAAAACGCTCACTGATTAAGTTAACTAAGAATCACATTGATTTCTGCAACAAA
TTAAAAACATACATGAGGATTTTCTTAGACTGATTATTACTTATAAAAATTGTTAAAAGAATTTATGAATACTTTATAG
ACTTTGCTTTTTTTTTTTTTAAGACAGAAAAATGTTTGGCTGAGAAAGAACATAATGTCTAGAAGATTAATTTTTTAAA
ATGTGTTTCATGTCTCATGTCTCCTGACCTAAACAAATAAAATCAAGAACATTTATGACATGAAAAAAAAAAAAAAAA
>Contig450 8139 reads, 1210 bases
TCTCAGACACAGAAAAACCACAACCTCATTAGCATAGTTTTTTTTTCCGAAAATATGACCAGAAAATCTCTAACTAATT
GTACGAATGTTTAAAAAAATGATAATCACGACAAGCGAGTCTCTAACAATTTCAACAAAATAATGAGTTAATTATCAAA
ACTATTTCTTTTATTTCCTGAATATTATATCACTAACTTCCTGTAAAGCCAGTTTCTAAATTTTAATGGATGAACTATC
AACGGGGGCCCCGCCCCATCTGTCAACTCATAACGAAGCTTCTGTAAGAATAATACATGTTAATGTTCATACTCAACTA
TATTCTTACTAATGGAGTTTGTTTATAGTCATCATTTTAAAAATATATTTTAAGTGACAGTGTAAGGACTCGCTATTGA
AGTGACTTTAAGATGTTTCTTTTGGGGAGGTAACTCTAATCCGATGGCTCATCTGTTAGCTCCACATTGTCCCCCGTTT
CACCACAACGACCAGCAGAAACTTTCTGAATCTGATTGGCTGCCGGTCTCATACAGTTGACCGCGAGCAGGGAGCAGTC
GTTGGAATAAGTGTTACTATCACTGCCACACAGCGGACTCCAGATGGCGGAACATATGCTGGGGCATTCGGGGACATCC
GCCCCACCTGTGTTACTAATGACCATAAGTACCATCACAGCAATTGTTATCAACATTGTGAACTTTGACATCTCGACTT
CTCCGTTGAATGATCTCTGGTGATAGTTAGCTAAAAGTCTGTCACAGCTGCCCAGCTAGGAGATTTCTGTGAGTGATTA
TTACCCTGTTATCCCTATTTTTTTTTTTTTTTTTTTTGAGTCTACAAACATGTTTAATATTAATGTCAGTGCAATGTAT
TGAATATTTACAACCAATGGCATGGGGATGTTAGGACAAACTCTAACGACAACACAAGTCGTTAAATGGCGTGGTGACC
AACCACTCTATCATGAAAACTTCATTTTGTTAAGTTATCATGTCAATAACGAGTCAAATGTGCATGGACATACAGTTGA
AGAAAAGAGTCTTCCTGTCGGAGTGACAGAATAACCCTTATAATTATAATATAATGCAAATGGGTTTGATTTGTGATGT
CAACAGATCTCGCAGGATACATCAACAATCAAGTCTAGCATCACATGAAGGCATGGACCAGTGTTTTCATTTTGATTAA
AATAATGGGAGAAACAATATCCTGC
>Contig451 4638 reads, 1254 bases
TACACGACGCTCTTCCTGTATTTGGTAGACGTGGTATTTATTGAGAAATATATTTGAAGGTCTGTAGTCCGTTGTACAG
CGTTTGGATTTTGGCTTCTTTTAGAAGATTGGCCACGCTAGGTGATACAAATTTCCCAAGGCTGCAAGGGAAACCAATA
GCAAGGACCACGCCAATAGTGATCCATTCACCACTCATCTTGTGATTACATATTACCGGAGCCCCTCCGTCATTAAAGC
ATGGTCCAGTTTTTGAACTTTTGCCGTCCAAACGTGTGTACTTCAAAGTGCCGTATGTAAGCGTGATTGTGTTGATGGA
GACTTTCACTTCTTGTAATGTCTTGCTTGTTGACCCGAATGTATCTGTCGTGTCACCATACCCCACGATACGACAGTCT
GTGAGGTCAATATCTGAAGCAACTATCCTGGCGTTGGGGAAACATGCTGGCTGGACACACCGGTCATTGAAGGTCAAGG
GCGAGCTGAGGGAAATGGTGTAAAGTTTCGTGTTGGCTCCAGTGGGGTCCAGAGTGGTGGCCGTGGAGGCGATGACGTA
AGGCGAGCTGGTGGACACATTCTCTTGGTGGTAGGACTCCGCGTGCACGTAAACAAGTTGTGACACATTGCTTCGGATG
ATAGACAGACAGAAATCATCGATTAGTATTTTATTCTCTTCCAGCAAAGTCCCCATACACTGGAATGATTCGCTGGGGC
CATCGGGATCCTTGTAAAGGCCCACAACTCCTGGGTACTCGCATTCTGTGACAACGTCCGTGCCAGAGTACATCCTCTT
GACCATGGTGGACAACTTGGCGGTTCTATTCTTGGTGTAGTAACATGCGTCTTCAAATGGTGTGGTCGTGGGAATTTCC
GTTGTGGTGGTAGCTGCGCATGGGCAGAGGGAGCTAAAGTTTTCGTCATTGCCTTCTCTACACGCTAGCTGACAGTATG
AGTTATCAGATGTATATGGTGAAAGTGTTGTCGTAGTTGGTGTGTAGTCAGGAAGGAGCATGCAAGGGCCGCCTATTGA
AAACTTTCCACAAATGCTTGCATTCACATGTTGATTTAACAGGAATCCAAAAGCAAAAGATATAATTATGTTACAGAAA
TGTGCAGACTTCATTTCAACAAATAATAGTTCTTTTATCTAGCAAATTATCGAAAGATCTAAAGCAAGAGTTGAGAAAA
ATGTCCCGCCTACAATTATCGTCTACCAATGTGTCGAAGTGACCGATGGGAAATATTCCTCAGGTAAAG
>Contig452 5965 reads, 736 bases
AATTTAACTTAAACCAAGATGATTGAAATGTGCCTACACATTTTGAATGCTTTCTAATTATTATCGAACAGGGGGAAAA
ATCAATAAATGAGTTGTAAAAAAATCAATGAGCTTTATTTTCAAACAAACACCAGGCAGATCAAGTTTATAATCAAGAA
AAACTAAGCATCTTGGCGGCACTACAGTGTTAAGAAGTGTGTTGGGGGAGACATAAGGCTGCTGATGGGGGTCATCAAC
CAATGACGATGCCGCTGTCGGCGATGGCCACTTGGACACGGACAGGGATGAGCACGTTGTCGATGACGTGGACGACTCC
GTTGACAGAGCCGATGTCACGCTCCACGATGGTCGCGTGGTTGACCCTGAGGCCGCCACTTCCATCCTCTAGTATCATG
AGATTGTCTTTGTGTTGGTCAGAGGTTGGCACAGTCAGCGAATGTTTCATGCCGATACTATATAAAGTTAACTGTTTTA
CCAAGTGAAACTTGAGAACCTCTGCCAGGTCAGCTGGATGGCTGTTCAGGTAGTCAAGGGTTTGTTGACTTAACTTCTT
GAAGGCATCGTTGTTAGGGGCAAATATTGTGGTCGAGTGGTCAGATGTGAAAAAGTTTGTGAGATTGGCCTGGGCGATG
AGACTCTCGAAAGTTGAGATCTCTGGTTTGTTGGTCCCAATGTCAACAATGTTACCAACTGGCGGTGTCAGGACGGTAT
CTATTCCCTGGACGTAACCTTGTTA
>Contig453 2948 reads, 633 bases
CGCCCACGAAGTGTTGTTGTTGTTTTTCTGTTTACCGTAGTTTATTTTGTTTCTTTTCGCAATGATTAGGAGCACCTGG
GAACATTCAGGCGGTATGGTGACAGTGGAGTTTCGTAATAATTACAATTACTTTTTTATAAATCCCACCTGATTTGAAA
ATATAACACACATTATCTTAATGTTAGTAGCTTAAAAACGTCCTTTTTGTCTTGTTTCATCAACGTGAGAGATATGAAA
AGAGAAATCACGCTATGAAGAGAACCTCTACGCCACTGGGCACGAGGGGCAACAGTTTCCCGGTTTGGTAACAGGATAG
GCATTGTTTGCACAGTGAGGCCACCCGCACTGCATGGTCTCACAGATGGCCTTGTTGTTCTCGTCACAGTAACACGACG
TGCAGGGATTCTTCTGGTAACGTTGTCCTGGTCTGTAAGTGGCGTCTCTGTATTTACAACTCTCTGTCATTACAAAAGC
AGCAATCACAAGCAGAGATGTTACGATGAATTTCATTATGAGACCTTGGTAAGCGTCCGTAAAATGAATTTCACTCTAT
CTGAGTAAACTGAATCTTTTTCCACACAGGACCAGTGGATAGTCAGAACTTGAACCGATAGTTTGATTATTTACCCTGT
T
>Contig454 8019 reads, 881 bases
CTCAAAAAAAAATAGGGATAACAGGGTAATATTCTCCATCTAAAACTTAAAGGAGGACTAATCTTGAAAATGATCAAGC
AGTTCAGTTTCTACTTGTTACTATCAACTTTTCTGACTTCTTGTGTCACGCCTATAGTTTCTCAAGATTTTTGCAACGG
TTTGGGGAATGGCGCCTATCCTCACCCCACCTCATGCACTCAGTTCTATCTTTGTGAGAACGGACGGACACATCTCTAC
CAATGTCCAGCTGGAAATTTATTTGACGAATACTCGAGGGCGTGCACTGACCCACAAAGTGCCAGGTGCCACATGAGCA
CTACTTCAGTGCCACTGACAACACTAAGCCCAGAGTACTGCAGACTGCCCGGTATGGCAAGTGGAATCCATCCTCATCC
TGTGTTATGTAACCAGTACATCTTGTGCACTAACGGAAATACTCAGATTTATAGCTGTCAGACTGGACTCGTCTTTGAC
ACAACAGTACACGCTTGTGTTGACGGCATCTGCAATCATCAGGGAGCCACTGTCATTCCAGGTTTTCAAGGTCTTGACA
CAGTTTGTGAGAGGTACAGATTGCCAGGTGGGATTTACCCGGACCCAGCCAACTGTAATTACTTTGTGGAGTGTCTGGA
CGGCGTGACGCATATCATGCAATGCCCGGATGGTCTCAAGTATAACGTAGTATCCAAAAGTTGCGACCACCATGGTAAC
GTCAACTGTAACAACAATTATGGTTACACCTTTTCATAATTTTTGAGATAAATAAATGACGTTGATGTGAATAATTCGA
CCATGACATTGAAGAATGGAATACAGAACTCTAAAAGAATACACAAACAACGGGGGATCGGAAGAGCGTCGTGTAGGGA
AAGAGTGTAGAT
>Contig455 5958 reads, 724 bases
TCCCTATTTTTTTTTTTTTTTTGCAGATGCATTATTTTTAATTGGTTTTGGTAAATGATAAAAGAGACTGACATTAATT
TTCATGTTTGTCCAATCATAGTGCTGGTTACATCTTGTCTTTGGAAGTTGAAAACAGTTGATAAGGGTATAGACAGTGC
TGTTAATAGTACAATATTTTTTACTGGACGACTAGATTTTGCAAGTCATTTGACAAGTAGAAGTTGGTTTAAGGTTAAA
ATCCATTTTTAAAACTAGAGAGTTCCCAGCCCGATTGTTTGTAGAGTGTATTCATTGAGTTGGTCAGCCGATATTTCGA
GTGTGAAACTGCATGACAGAGATGACATATGACATTTACGCCACATTAAATACAATTGGATGCGATACATGCCAGGGAC
CTTGACATCCAACTGGACAACTCTTTGGAGCCACTACAATCATGGTGTGCTTCCAAATGACGACTTGAAATCTGGCCAA
AACTTTCAGTGTGATGACGTCACGGGCAGTGCTCTTACCGCTAGATCCCCGATGTCCAATAAAAAGTGTACGTAGCAAA
TAGGTCCTTGTGTGTTCACCGACCAGCAGATGGATTTAAGTACTGACAGATGTGATGTTGGATGACAGGTCCGACCAGC
GGACGGAAGTGGGCGTGGTTTGGTAGAGAGAAGGAAGGCACATTACCCTGTTATCCCTATTTTTTTTTTTTTTTTTGCA
GTTAAAAAAGTTT
>Contig456 4942 reads, 708 bases
AAAAAAAGTTCCCAGACCCTTGCTCTCGCAACTCCATAAACCTTTCCCTCCACGCAAGAGAAAACTAACAACGCAGACT
ATGACTGCATAGATGAGCCAACTGCTCATGCGCATGACACGTCCAGCTGTAACTATAAAAGTGGATGCGGGCTGTGAGT
CGCTAATTATTCATTCGAAATTGAAGGTTATGCAGTCATGAGTGGAATTATCACACGTATCGCTACAGTTTGTCTCATC
TTTAACATTCTCGGAGCACAGGCGCAGCAAATAACAGCTCGGTTTAACTATGGCGAATGTTGGGGCACTCTCAGAATAT
GCAATATTGTTAATGTGGATTTCGCTGACCCTTGTGATTTTGCCTGTAAAGATTTAAGCTACGACTATGGAGTCTGTGA
CCTGGCCCCTACTTCTGAATGTCCGGGACGTGCGCGTTACAGATGCCAGTGCAGGCGTGTGGCACGGAATTAGAAGGAT
CATGTGCTCCAGGAGTGGAAACAGGAGAATAATGTTTTGAGTCACCTGGCTATCCGAATAAACTCTGATTTCATTTTCT
TTTATATCTATTTTTGTCTATCTGTATAAATTTATGTATCTATTTATGCATAGATAGATATTAAAAAATATTCATTTAT
TTATCTCTCTGAAAACAACAGTACATAAATGTTGCTCTATTAAATGTGGAAAAGAATCAAAATGCAAAAAATAGGG
>Contig457 8501 reads, 1410 bases
CCCTGTTATCCCTATTTTTTTTTTTTTTTTTTGGCCTCGGAAATTATATTTTATTTAGTGAACTAACAGTTTACAGGCG
GTAGACATAGACACTGCCTTCGTCGTAGGATGGGGCGAATAACTCCACATGACCGTCGCCATCTACATCCGCCAAACTA
AGGCCACCAACTGTACTTGTTCCAGTTGTGAGGAAATCATTACGCGTGTAGTCCCAGTTCTTGGGATCTGTGGGAGACT
TGGGGACCAGAAGGGAGACTACTGCAGAGTCATCGCCAGCAATAAAGATAGACGGTTTCCTCCCTGCACTTGTAGTTCC
AGGTAAGATGTATGGAGATCCTGGGCCTCCCTTGTTTATCCCTAGAGAGTGGACAGCGTAACCATCAGCTAAAAGATGG
CGAGTATAGTGTCCGGACCTGAAATCATCAGGTACCTCATAGACCACAACTGTACCATTGTGGTCACTGTTAGTGGTCA
CTAGGATGTCCAGCTTGTGGTCGCCATTGATGTCAGTGACCAGCACATCGAATGGTTTCCCAGCGGTGCTGTCCACTAC
CACACTTCGTACTGACGATTTGTCGGACCAGTCTTGTCGAGCATTCTCTGTCCAGTAGACGGCGACCTTGGGGTTAAAG
AACTCGGTCACAACTATGGCCTCGTAATTCCTGGAGCCGACCTTGAATGTGGTCACAGTGAAGAAAATGTCCGGCCCAG
CAGCCAGGATGTTCTCATGCCATGGAGTGGACACTGAGTGACCAGGTGGATTAGTGAACCAAACCAGTTCTCCCTTGGC
TGCCCCAATCATGGGTTTGTTAGCTCGACACGTCAGAGCGTCCAGTGTGCCATCTTTGTTCATGTCCACCCACAAGACC
CGGTGGTAGAACCAGCTCCCGCTCCCACTCGAGATGGTGGACAGCGTGGGGTGGGGGGCGTCCAGGTTGTACAGCTGGA
TGGAGCCGTCCGTCTTCGTGGGAACCAGGAAACCATCAGGGATGGCAACATATCGGCTGTTCAAAGCTCTAAATGGGAC
CCCAGAGATCTCATTCGGCCACTTCAAGGAGTGTGAGAAGGTCACTGGCTTGATCTTGGTGACGTCACCAAGCAGTTTC
CCCACGTCTGGCACTATGCTGACGTCACTGGTCAAGGCGCCGAAACTGGTGAGCAGCAGGTCGTAGCCAGAGTTGCCAG
TGCGGGGGTAGACGGCGGAGAATGCGGCGTGGGGGTAGGAGAATTTACCCAACAGTTGAGGCGCGCCATGGACACAGAG
GAACAAGGTCAAAACGGGAATCAATCGCTGTATTGTCTTCATGCTATAGGCTTACTTTCATTACTTCTCAATTGAAGAA
GTTTAACCAATATGAAAGAAAGTAAATATATTCCATAAACAATTTATAGAAAWAAMWTGATTTTGAC
>Contig458 6809 reads, 788 bases
CGCTCTTCCGATCTTGGAGGTCGACGTCTATTACTGCGTCCACGTGCTCTCCTCTGCGAGGACGATAAGCGCACCGATT
GAACATTTATTTCACTGTCCGTCAAGTTTGATGCCTTTAAGGTGCAGATGGTAACAGACCACATTCTGTCATGCTCGTG
GTGAATGTATACGCTTTGTGTTCCCTGGATGGCCTGGTCTACCGGTATATTGAAGTTCATTTCTTCCCCAAGTTCATGT
ACGGCTAACTTATGCTCACAGTCAAGTGGTTCCCGACCGAGGACATTGCAGCAACGGTAATTAAATACTCGATCCTCTT
TATCGTTGTTATGACGACTGCCTACGCCAGTCACCACTTGATCCTTTGGACATTTAAAGTCCACAATCTGATTATTTTC
GTTTACCCAGGAGCTCTGATAGCAGTCATACGTGACACCAGCTTCCTTGCAACCATACCGCCATCGTCGGTCTTTGTGT
GACTCGTGATAAATACTAGATATAGAACTGATTACTTGTCCGTATGGACAATTGAAATCCACGTCCTGGTACCAATCAT
TGGCATAGTAGTTAGTGCTTGCTGCCATCACCATGATGAGACATAAAAAGATGCTCAGGTGACCTGACATATTATTTTA
GTGTTCGGCTGAAAATGGACGTCTCGCCCGAAAATGTTTCGCGTGGCACCAGGTTGGACAGTGAGTTTACAGATCTGCT
CGAACTGACTGAATAATCAAAAGTTGACAACGCAAGATTACCCAAGATTACCCGTTATCCCTATTTTTTTGTGAGTC
>Contig459 9718 reads, 681 bases
AAAAAAAATAGGGATAACAGGGTAATACACAGAGTCGACAGAACCTGTCCGTCGCAACAATCTGAACTTATCTTCAGAT
AAGAGCAGCCTATCGGCAGTGTCTGTGGCGATGTCATTCCCCAGGACATAAAAAATGACCCAGTGCCTCTATGTCGGCG
TACTGCTAGTGTTCCTGGTCTATGCGGCCGTCTGCCGGGCCGACCCCCTCTGTCACTACGCCTGTAATGTGCCACAGCC
AAATACCGATGAGGTCAGCCGACTCTTCCAGGTTATGTGCGGGTGCCTGAACCAAAAAATGTCCCTCCAGAATGACCTG
TTGCTAATCCTTGGCCCGGATGACAAATGTCTAGATCCTCAGCCCTTCGCCCTCACCACACAAAAACCGCCGCCGTCGA
CAACAGACATATGTGACCTGCTGTGCTCTATACAGATGGGCGGGGACGCATGCCTGTGCAGCAACCCAAGTCTACCCGG
ATAGCGGGCTGGACTGTTGCAGTTGTGCGGATAATGGTTTGATTGTGGGACTCTCGCTGGCAGCAGTGAAGTTTTGGCC
TTTACGTTGCGCTGAGAATATATTTAAATAAAAACTTTTAATAAAAGCTGAAATGAATAAAGTGTGAGCAAATAACAAT
AATATATTTATTTATGTATCAAAAAAAAAAAAAAATAGGGATAACAGGG
>Contig460 25 reads, 216 bases
ACTCTTTCCCTACACGACGCTCTTCCGATCAAAAAAATAGGGATAACAGGGTAATCAGTTTATTCACAGTAAGCAACGC
ACGAAAATGAAGTTCATTATTCTACTTGTATGTGTAGCCATCTTGTGTTTGTACCAGGTATACGGTGCCGCCATACAAT
GTATTCCGAGTGGAATAATGTGCTTAAGATCGGAAGAGCGTCGTGTAGGGAAAGAGTG
>Contig461 4572 reads, 794 bases
TTTTTTTTTTTTAATTTAAAGCAATATTTATTGTCAGAAAAAAAAGAAGTACAGGCAATGAATGATTCCGGTTTCATTT
ATATCACTTGCACCACACAAGGTCATGAATCACTTCTAGCCAGCTAACGCATCAACAATTAAAAAAAAAATGTGCTTCA
CTTTGTAATAAAAGGTCTTTTTTGGTCAAGTTATCTGTCAATAACTAAAACTCTACATGTCAAATACACTCTTCAGTGC
CAACTCTGGTTTATCATAGCCCATCTCCTCAGGTGTGAGAATACCAAGCTCATCAAGTGTAGGTTTGATTTCCTTCAAC
AACCATGGCCATATTTTCTTCTTTTCACCACCACACTTCCACTGCACGGATTCCAAATACCTAACAGCCAAGGCATAAT
CATTCACACGTCTGCAAGCTTTCAATGCAGAAATAATGATGCGTGGCTCTGGCACAAGATCTTCACCAGTAAGATCATT
CATTGCCTTTCTGATTTCCCATCCATCTATATCAGTGCGCTCAAAATGTTTCACATATCTATTGTCAAACTCCTCATCA
GTTTCTTGGTGACCATGACTGTTGCGCACAGCTGTAATTGCTCCAGCTTGCACCTTTAAACAGTGTCTAGCTGCATTTT
GAAGGGAAGTGCTGGCTCTTAAGGCTATCCTAAACATTTTTTACTATGAGACGTGATTGACCTCAAACTTAACGTCCTC
CTTAGGAAACAAAACCGGATTTTGATTACCCTGTTATCCCTATTTATTTTTTTTTTTTTKNCGCATGNTAATCTTTAAT
GTTA
>Contig462 14853 reads, 525 bases
AAAAAAAAAAAAAAAAAAAAAAAAAAAAAAAAAATAGGGATAACAGGGTAATGTAACCGTCATCTCCCCATTGGTCAGT
CGTGTCTCCCATCAAGGTAACCAACAACAAGATCACAATGTACGGTGCTAAAATAATACGTGTCCTGGGAATGACAGCT
GTTATAGCCTACGCCTGTTATGTGACTGTCATTGATGCTGCCTGTCAGAACCCAAACTTCTGTCAATTTTGTAGCAACG
GCACACGACGTTGTTAAAGACAGGAAAAGACCCCCTTACCAACTCGGAGATATTGACAAATCACGAACGTTTACTGGAC
GATGGACCCGGAGGAAATCTTACACTATATTTTTGAAACCGAACCATGTCTAAAATCATATTTAACTTTACGTAAAGGT
TTGGATTTTGGAAGGCATTGTCTTTTCTGTACATTACAGTTTATTTACTCCAATGCTGCACTTCAAAAATTTATAATTA
CAAATAAAATAGCATTTAAAACAAAAAAAAAAAAAAAAATAGGGATAACAG
>Contig463 2196 reads, 480 bases
GTTATCCCTATTTTTTTTTTTTTTTTTTAAATTAATACACTTTTTATTTTAATAAATTTATGACTTCGGCATAAGCAGT
AATCAGATTAAAACGACTAATGATCTGCTCTACACACTATTTCTTGGTATCATACTTTAGTCATGTGGTAGATCGAAGA
AGGTGTGATGCCGCTTGGCTCTAATTTCTTCCCATTGCTTAACATTTGCTGGAGAATAGCTTAGTTTTGACAAATATAC
AAACACTGGAAATAGTGCTGCACTTGTATAAAAGTAATATCTAAATACTCTTGAATATTTCCAGTAAAAAGCAAAAGGA
AATTGCTGTATTTTTGAATAAGCAGTCCATGGATGCTTGAAAAGCTCACCACCACCCCGGATTTTCTCAACAGGCATCT
TGCAGATACTTATCAAAAGAAATGTACCCTGAGCAAGGTCACTGAAAGCCCGGAAACGGTTTCAATTTTATGACATTAS
YMCAAA
>Contig464 2951 reads, 534 bases
CCTTGCATCACGTCCCAGTCATCTCTTGCATACACCACTTGTGGTCATCTATCATTCCTTGCATCACGTCCCAGTCATC
TCTTGCAACCTTGCATACACCACTTGTGGTCATCTATCATTCCTTGCATCACGTCCCAGTCATCTCTTGCAGCACATCA
TCCGACTTGTCACAATTTCACGAGGTTTCATCTCCCACTGCTTGACACAGACAATCAGCACTGACAGTTTCCTGTCCCT
TTGCTGCCAGCATCACATTTGCAATCTTCAGCTGAACATTTGCATGTCTTGCAGCTAGGGCAGTTGCATCCCTCACCAC
ACTTGCAGCTATCCCCACAAGTGCATTGTTCACCAGTGCAGGCCTCAGTACAGTTTGGTCCCTTTCCGCTCATGTTGTA
GAAGTTATTGATGAAATTACACAGTAGTAACAACGTAGAGCTCTGTGTTATTTGTTGAGTGACCCAAGGCCTTGGACGG
TTTATGTAGGGTAGTTTTTTTGCACACGGCTCACTGGTGTCACAAGGGTTTWKATTACCC
>Contig465 8436 reads, 1522 bases
GGGTAATCAAGACAATCACGCTAGTCATTGACCAAGAAGACTCCACAAGGGAGTACCTGACCTCCAGCCCATCTAATGG
TGATGACACGATTAGAGAAGGTTACGTGGCGCAAGACCCTGGCAGTGAGTTTTATGGAGATGTTCATTTCTATGACTAC
TCTGTGGACCAGTGGAGCGTGAATGGTTTCAGGGTCCCCAGAATGGCATCCGAGTTTGGTGTGCAGGCCTGGTGCAACA
ACGAGACATTGGCCAGTGTGTTTCTGCCTGCAGACTATGGCATGGGGTCAGACATGGTCAATCACAGACAACATCACGG
AAATGGTAACAATGAAATGGCTGCAGAAGTGGCACTTCACATCAACTTACCAAACTCACCTGATGAAAGAGAGAAGTTT
GTAGATTTTATCTACCTTACTCAGATCAATCAGGCCATGTGTATTCGGTCACAAACAGAGCATTACAGACGTCACCAGT
CACAGCTCCTGTCAGATGGTCGAGGCTTGACCATGGGAGCATTGTACTGGCAGTTAAATGACATTTGGCAGGCACCAAC
TTGGGCTTCTATAGACTATTCAGGATCATGGAAGATGCTCCACTACTATGCAAAGTCCTTCTATAACAAACATCTGATC
TCCCCTTACTATAAAGATAAAGAGACACTGGATGTTTACATAGTTCTGGATGAAATACCAGTCAAAGAAGTCAGGAATC
CACTTAATGGTTTTTTGTCTCTGGAGCCAATGACTCAGGTCAGTGACTACTCAGGGTCTGTGATACCGTCCCAGGAGGT
GTCCAAGTATGTCCAAAACATCATCAGAGCAACAACTGGCTATCTAAAAATAGACATGTTTCAATACTCCAGTTTGCAG
CCATTATTTTCTTGGAACATTTCCTATACACTCAAGTCCACAGCTGAGTCCGTCCTGACCAAGACCGTTGCTGACCTCC
TCTCTGAATCTGGATGTCCAGCCAAGGAAAAATGTCTTCTTTACTTCACTGCCACAGATGGGTCTGGTGCTGTATTGTC
TAAGACCTGGTTTGCACTCACCTATCCTAAAGATTCAATACTGCCCAAGGCAAAAGTGCAGATTGCATCTGTGCAACAA
CTCAGCTCTGACACCTTTGAGGTAACGATAAGCAGCGACATCGTGGCCCTCTATGTCTGGATCTCAACAGACGTCAGTG
GCTATTTCTCAGACAACGGCTTCCCCGCGGTGTCAGCCCTCACCACAGTAACGTTCTATGCCAGGGAAGACGTCAGCCT
AGCCGAGTTGAATGCACGGCTCAGAGTTAGAAGCATCACGGATGTTAAAAACCACGTGACTGACCCAGTTGTAGGTTAA
AACTAAGCTCAACGGAATGAAAAAAAAAAAAAAAAATAGGGATAACAGGGTAATTTAACTGCAATATCTTGGAATTATT
TGACTTGTATAAAAGGACTTGACCAAATCTTACTCTACTCGACATAAAACCAACATCTGACATGGGGCACCAAANAATT
AGTGTGCTGGAGATACAGACG
>Contig466 5113 reads, 580 bases
CACGMCGCTCTTCCGATCTGGGTAATAAAACAAACGTTATCAGCGTCATGAGGTTGCACTGCGAGGAAAGCGTCACTAC
CAGCGCGTTCTTTTGACAGACCAAGTAATCGCTTGCGACGTTCTCTTGTAGAAAGATTGTGACAGGCAGAGACAAAGAT
TTGTTTCGCATATATTTTAATTGATTAACCACAAACTGTTTTGATCTTCAACGATGTCCGACCGTCCCCAAGACAAAGC
TGACAATGACAATAAATCGAACCAGTGCAATCCCAACAATGAAAAATTCGAAGGCCACAAGCCTGGTTACCCGGGAACT
GCGACAAAGTCTGACCTTGATAACCACAGCAATCAGCTGAATCCTAACAGTGACAAATTCCAGGAGCCGAAGAAATAGA
AAGCTATTCAATGGCTTCCGAAGGATGCTGATAAAATGGAGCGAGGTACTAAGAAAAGAACAGCATAAAATTAATTTTT
ATTTTTGGAATAATAATGTCAGTCTCTTGTCCTCAGTGGTGACGATCAAAGAATAAACAATTTTCGTGAAATTCAAAAA
AAAAAAAAAAAATAGGGATAACAGGGA
>Contig467 764 reads, 209 bases
GGGATAACAGGGWAAAAAAAAAAAAATAGGGATAACAGGGTAATATTTCTGATTATCGAAATCATCGAGTCTGCGATCT
CAGGAGCATCAGACAAAAGACATGTTTCTCCTCTACGCCATCTTCTTGGTCCCGGCCTTGACCTCCGCTCAGGAGCCAA
TCAACTTGAAGCCGTACAACCTGACGGCGACAGCCATGTTCTTGAATGTCG
>Contig468 6636 reads, 489 bases
TTTTTTTATGTAAACAATTGTTTTTTTTTTTCAAGATTTATCATTTTATTTTATTGTTTAAAATTTCAATCTATATTGT
ATTTGCTGGCACTCAGATACATGACGCATTCAAATTCATTTATTGTAAGTTCCATGCGTTGTATGTAACATCTCATACG
TTAACCCCGGTTTCGCAGACTGGACAGCACTTCCCAGGTGGGGTGGCATGTTTCTGGCAAGTAAGTGTGGGACAGTCGA
TGTCGGTACAGGTTAGTATTGTACTAGAACATGTGCAAATCTCACATGGGGACGGCATATATTGAGCTCCATTCTGAAT
AAAAACACTTTTATAGAGACAACTCCCGTGCTCCGCCACGACACAACACAGCCAACAAGCGATGATAACAATGAGTTTC
ATGTTGATCTCTCGGTCATTACTGATGGTTCAGCTCTATGGTCTACTCTCTAAACTAACCAAGAAACAAGTCTATTACC
CGGAAGAGCGTCGTG
>Contig469 4450 reads, 673 bases
GTACAAACACCACCTCCTCTACCAACGAGTCACCAGTCTTCCCAATTTTCGTACAAACACCACCTCCTCTACCAACGAG
TCTCTTCTTTCTTCCGATTGGCTGAATTGTGCTGACGCAGCACTCGTCTGCTCCACAGTCTTTCCCAGATGAGCACGAA
CCGCCTGCTGCTCTCCTACTCGGAGCCATCAATTTGCACGTCCCGATCTCTCCTTGCGGCATTTCAAACTGTCCGCTCC
CCTCACACTTCTGGCCTGACTGACAGGGACAACCGTTTAGGTACAGCTGACTTGAGTGGTTTGACAGGAACTGGTCATT
GTTGACGTAACACTTGCCTCCTTCTGACACCCTGGCCTGGCAGTAGCCAACAGCTTCTCGTTTGCCCCTGAGCATGACC
GGACTGAGACAACACTGACCGAATCCACAGTCGGCGCTTGTGATGCAAGACTTTGTCTGACGTAGACGTTCGCTGTCTC
GCCTCCTGGCCCCCGACAGACCGATGTGAAGGACTATGACTACAAATCCTACAATTAAAATCTTCATCTTTAAATGATG
TGTTAGTATGGACGTCACAGCACAAAATACTTAACAGGTTTAATTACCCTGGTCGTATTTAGAGTTTGTAAATAGACCA
GAAACGGGATTTACATTTTTTTTTAACCAGGGCATTATTAC
>Contig470 9452 reads, 1218 bases
GGGTAATAAACACTTAAAATCGTGTCAGTCAATAGGGAAACACACTGACAGGAAGGGAGTTACAGTTACTCAAAACAAA
ACAACAGGAGGCGATCCGTTGAAAGTAATTTGTTCAATATTGTTTTCAACTTTGTTATCAACAATGAACCCAATAACAT
TTGTTTCTTCTGTGACGATCTTCGCTGCCTTCATTACTGCTTGTTCAGCCAAGTGGTATCCAAGTGTATATTACTTGGA
AGACTATTGCCAAAAATCACTGACAGTGCGCAATGACATCATCATCAAGATTTCCCGTAAAGTCTATTTGCCCAGCAAT
TGGTTATGCTCTGTAACACTGAGGCCGTACTCAGGCTACGAAGTAGTGGCATCATTTCACAGCTACTACATGAGCAGCG
CGTATACCTACTCTAGCAATTGTTACTATGAGGCAATACAGTTGGGCAGCCCACAATATCCAAGCATTTTAGGGCAATA
TGGTTACTGCAAGTCAAACACTCCAAAATCTCAGTACCACTTGACCAACATGGGCACAGTCAGCTTCGCAACTGGACCT
TACAGTTACTTGACGCCACCGTCAATACAGCTGCTCATAACAGAAGTTTACGCCAGGAACTCCACAGGATATTGTACCG
GCGGCAGATTTGATTGCAATGGCAACAACCAGTGCATCGACCAGCAGCTGACCTGCAACGGATATGACGACTGCGCCAA
TGATAATGACGAGTTCGAAGGTTGTGGAATCACGCTGTCAACAGGAGTCATCGGGGGCATCGTTGCCGGCGTCTTTATC
TTCATCGTCCTTGTCGTTGTCTTGTCTTTGTTGGTAAGAAGGCAACGGATGAGGGTGACCTACATACAGTACCAGTAAT
ACACGAATCAGATCGAACACCAGACTCGTTGGCGGAAATTTAAAATAGGAACGTTTTTACGTCAGTAAGTTTATATTAA
AAAACGAAGCAATTGTTTTTTTCCTAACTAAATTTAATTGGAAATAATGGATAGATACTAATGTCAATGGACATTTATA
TTATATTTCGTAAATATGCCATATAAACATATTTTATTTTAAAAGACTAAGTTTATGTCACCATATTATTTTATGATAA
ATCAGAGGAAYCCGAAATTTATTACACTGGAATTACCCAGCCATTATGAATAAATTCAAACCATATTTATTTAAATTAT
GATTAAAATGTGTAGCTCAAGATCGGAAGAGCG
>Contig471 14063 reads, 514 bases
CTTAGTCTGAGAAGAAAAAAAAAAAAAAAAAATAGGGATAACAGGGTAATATCGTAAACTTGTATCGCTTTGTGAGATC
TGACCAACCTATCACCAAGAATGGCCAGCAAACGCATCCTCTGTCTGACGGTGATGTGCCTCTTCAGCATGGCTTCTTC
CACCTTCTATGGCGGTAACACACTGCAGCAGTTCCAGCTCCTGGCACAACTCCTGAGGTCATCCATCACAAGCACTGCC
AGAGCCGCCACCCAGACCTCCCCCGTCTTATCCACAACGGCATTGGACTCTCTCCTCAACTTAGTCAACCAAATTCTGA
CACGACTACAAGCCATCGAAACCCAACTTAATAGTCAACCCGTTGCTGTTGCTGGTTAACACACCCCAGTTAGTCATTG
TGATGACGTGTTTCCGGAGATGTTCAAGTTCTAATGTTGACTGGAGATCTCATAAATAAACAAGTACAAAACATTAAAA
AAAAAAAAAAATAGGGATAACAGGAAATGGACATTAGAAT
>Contig472 8786 reads, 693 bases
AAAAAAATAGGGMCCCCAAGCCGGGGAAGGCGCCGGTCAACGCCAGGCTCGGACAGCGCATCAACCTGACCCCCACTGA
CGTGCTCAAGATCCAGAGACTGTACGGGTGTCGTGAAGATACCACACATATTACTCAACCAATCACACAAGCCAAGTGC
CCGTTTGAGAACTCCATGTGTAGTTTGGTGCTAGAAGCTTCACCCACTTACAGAGCTGTGTTTGGAAAGGCCGCCACCA
CATCGGGCCCCTACGCTGGGAACACGAACGGCGCAGATTCCTTCCTGGTCATCCACGAGGTACCTGGACACACAGGGGT
CGTTCGTTTCCACACGGCCTCCTTCCGCAACGGCCCGGTGTGCATCGAGTTCTACCTGTTCCAGAAGGGCCCATCGTCC
TACATAGATCTCGTCTACAAGGGCCCCAACATTGCGACGACCGTCTTCAAGAGCTACCACAACAGCAACCACGCGACGT
GGTACCACAGCAAGACCTACCTCAACGTCAGTCCGGGGGTGGAATTTTCAATCACATTCCAAGCACACATGGCTGCCGG
GGACATCGCGATTGATGACCTCTACATCTACAACGGTCATTGCTTGTAATAACTGCTCTGGAATAATAACGCAAACAAA
TATTTAATAAAACTAATGATGAAAGTTTAAAAAAAAAAAAAAAAAAATARRATAGGGATAA
>Contig473 7423 reads, 806 bases
TCCCTGTTATCCCTATTTTTTTTTTTTTTTTTTGGCGTTTTAGATATTTTATGATTAAACAATTTTCAAGAAACACATT
TTTTGTCAAATAATAACGTAGCCATTTTAACTCAATAATGTAATGATCTGACTGCACGAAGGAGCTGTGAGGTAACGTT
AAAGAGGACTGACTAAAAAAAAAAGTCGGTCAACAGCTGTTCTTTCAATCTAGTTCAGTCTCCTGTTGGGGCCGTGGCT
TCTAAGTAACTTGGGAGATCTTGGCAGGCTTCATCATACGATGGCGGTGATTGGTCGCTTGTTTCCCGGGTCAAGGCAC
AACCCACGAGTTGCTCATAGGTTGGAGGGTCGTCCCTGGACGATGTATGTGGAGTGGTCGCCCACGGTGAGAGTCTCCC
AGACAAAGTGGCCGCCATCAGAGACCACCTTTCAGCTTTACTCTCCCATCTCTTCTGTCTTCTTGTCAGACAGCCGCTC
GTGTTGTACTGGCTGTTACATGCACGACATTCCAGGCGTCCAACAGTTTTGTCCAACCTCATCTGCCTTCTCTTCTGCT
TCAGTTGCCGCCTGGCATTGAAGGCTTGTATGAAATATATAAAAACTGAATAGATCCAATGGCTCAGTGTTACAATCAT
CGAGTGGAACATGGTCCAAAATAAAACGTAAGAAAAACTTTAAGCACCTTGATATCAAATATTCTTTTTTGATAGATTT
CTAATAACCGTCATTTTAAAAAAAAATAGTACAGTGATATTGGATTAAGGAAACACTTTACTAACATTTCGTCACTTCG
GGTTGTTCCGTTACCA
>Contig474 15829 reads, 671 bases
AAAAAAAAAAAAAAAATAGGGATAACAGGGTAATCAAACCATTTCAACTCGTTGCTATCTCCAGCATTCATCACTGACG
TGGAACAATGTCCAAACTTGCCATCCTTCTTGTCTGCCTTCCGGCCTTGGCCTTGTGCGCCGTTGACTGGGCTGCCATC
GCCGTGAGTTCTTTCGCGAAGATCGACCTAAACAGTGATGGCCACTTGGAGAAATCGGAAGTTGAGCGTTACTTTAAAC
AAACTTATGACACCAACAACGATGGCAAAGTAACCAGACAAGAATACGTTGCCGTAATAACTGCCGGGAACACTGACCA
AGCCCTCATCCGGGGCCTGACCAGTCTCTTCGATGGTCTGGATTTCAACAACGACCACACCATCGACAAGATCGATAAC
GACATATTGTTCGACCAAATCGACGGCAACAACAACGACCGCGTCACTCAACAGGAGTACGCATTATGGTTCGAGCTAG
CTATTAACCCCGTCGTTGGTTGAGTGTTTACCCTCTTTGTTGGCCACTTTAACCACATGGCAGTGTATCTTTGGAATAT
TTGAACTGATCAACGATGTGTATCTTTTTATGAACAATTAAATAAATGGAATTTTGCCTAGCAAAAAAAAAAAAAAAAA
ATAGGGATAACAGGGGCCCTGAAGTCTAACGTCTACACG
>Contig475 3724 reads, 955 bases
GGGYAATCGTTTCTCCTGGACAGTTTGGCTAATAAAGGAGTTAGAGCCCCTGCCTCTAAGCCTGGCGATGCTGGAACTT
WCACCATGGAAAAGGGTTTTGTCTCATACTACGAGGTTTGTGATTTGATAAAAGCAGGGAGCCAGGTGTTCGATGTGCC
CTCCCAGAGGAACCGTTACCTCCTTAAAGGCAACTTTTGGGTCGGCTACGACGACATCCAAAGTGTGACGGAAAAGGCC
TGCTACACAAAACAGAACAAGTTTGGCGGGGTCATGTTCTGGGCCCTTGACCTCGATGACTTCAATGGGAATACGTGCG
ACCAGGGCAGGTACCCACTGATAAACGCAGTCCTCAAGGAAATGGCTGACACCTCCACGGCCAAATGCCCAGCCAAACC
AGCCACCTCCACATCCCACACACCACAGCCCACCATCGCAGGTCCAAACCAAGCAGCCATTGCCCAATCAATCGGTGAA
TTCGACTGTGTCGGAAAACACAATGACTTCTATCCCGACCTCGCTTCCTGCAGCAGTTTCTTCGTCTGTGCCAACCAGG
TGCCCTACAAGGTCACGTGTGCTATGGGAATGCACTACAATGACGTCATCAAGTCATGTGACTATGCTTACCTGGCCAA
CTGTAAGCGAGAGGACAGCACGCAAATGCTAAGCACAACTCACAGTCCAGCCACAACGATGACTCAAGGCACAACAACC
ACTGTCAGTAATCCGTGCAGTGGCGTGTCCAAGGCCATGGTGGCCCACCCAGATGACTGCCATAAATACTTCTACTGTG
GCCCGGACGGCGGCAGTTTCTTGTTGGAGTGTCAACTTCCGTTAGTCTTCAACCCGAGCGTCCAGATGTGCGACCTCTT
CTCGAACTACCCGTGCACCAACCCTCACAAACTCCAATAAACGCGTCAGACATTCAAATATTAAAAAAAAAAWAGGGAT
AACAGGG
>Contig476 788 reads, 182 bases
AAAAAAAATAGGGATAACAGGGTAATAAAATTATAATCTGGCAACCCTGCTACCAAGAGTGAAAATGGCGAAGGTCGTA
ACTTATTTTACAAGTAAAGGGAATGCCATTCTTGGCTTTGCCAAACCCAGGTTAAACACAGCCTGGAGATATGCTAAAG
TTGAGCTTCGAGATCGGAAGAGCG
>Contig477 7140 reads, 1004 bases
AAAATTTTGGAAATAAAGCAAAAATTAAAATAAAAAAAAAAAAAAAAATAGGGATAACAGGGTAATATAGCATAGAACT
GTTAGCCTTCATGATAGTGACTTCCAACATCTAGAGACATTATCTGTTGGTGCGAACCTCTGATACCACAAGTTTCAAG
CGGCTATAACGTTTTAAGTAGAGCAAGTCATCTTCTAATAAGATTTCAAAATGAAAGTTTTTATCTTGGGTGGCACTGG
ACCAACTGGTCAGTGGGTGGTCAAGGAAGCTCTGACCAGATGTCACGAGGTGGTCGCTTTCGTTAGAAATCCAGAAAAA
CTTTCAATTAAAGGCAGCAAACTTAAGGTGGTGAAAGGTGACGTCAGAGACCCATCACACCTGTCCAAAGAGATGAAAG
GATGTCAGGCAGTCGTGTCATCACTAGGCAACCCGCCGGGGATATTCGTACCTTCCGACATTCACTCCACCAGCAGCGA
GGCAATAGTCAAGGGCATGAAGGAGGCGGGGCTAAAGAGGCTGGTCGTCTGCTCCTCGTGGGGAACAAGAGACGACAAG
CATCTTCCTTTCGCCTGGCGTTGGATTTTTATTCCGACCTTTCTACGTCACATCCTGCCTGACAAGAGAAAAATGGAAG
ATATCCTTGAAAGGGAAAAAAATAACTTGATCTTCACCTCGGTCAGACCTGGGCAACTTACTGACGACCCGACGACAGG
TCTACCACTTCTGACAGAGGAGGCACAGTGCGTCATCTATCGTCCCACGGACAAGATCAGTCGCCATGACGTGGCCAAG
TTCATGCTGGACTGTCTCGAGACGAAGGCACACGACAACAAGATGGTGGCTATCTGCTCGTCCAAGGACCCAAGCATCA
AGTGATGACCACTCTTATGAGGACGGGCATTGGGCTGGGCGCACGTCCTCAGAGAAAACACACATGGGTGGAGTTGAAT
AAATTAAAGAAAATTCTCAAATCTCAAAAAAAAAAAAAAAAATAGGGATAACAGGG
>Contig478 5343 reads, 602 bases
CTTATTACCCTGTTATCCCTATTTTTTTTTTTTTTTTTTAAAGTTCGCATCAAATTTTAATCACTCGTCAGCTGTTGTT
ATGGGAATAGAAGTTTATTAAAAGAAGAGTTTTTTTCATGAAGTCTTGTCTTGATATGAACCGCTAGAGATGGACTTCA
TCTTGCCCCTTTTTTAGCCAGCATGCGAGGACCACTGTTGTTGTTTCCTAACGTTTGTAATAAATGGCTGGGGTAAGTC
CATCGACATCGATGAAGCAGATTTATCTTCATTTGGTTTGTTCGTGGTGCCAAACTTTTTGATGATGTGGAACGTACTA
ATAGAACTGACCGAGTAAAATGTTGAGACAAGAAGACACACCAGCAACACGGTGTGTAGTCGGGCTGACGTCATCATAC
GCCGAACAAGCAGACACACGAGAGACACTTGACTGACTTTTGACTTTCTCTTCACTGACCTCCTGACCTGACGCTAGTT
CCACCAGAGTAGTCGCCCGTTGTCTGAATGCACCAAACACGAGACAAGACTTGTGCTTATATCGCCACTGGCTTCTTCA
AACTTCTCAATGGGGCAATGAAGCAATAGACTTCATACCCGCATTACCC
>Contig479 1462 reads, 263 bases
CCTGTTATTCTTTTTTTTTTTTTTTTTTTTTGTTTATATTTGTGTTTATTCAACTAATGGCAATGGTCATTCAACAGCG
AGTTCTCAAATACATTACCCTATAAAGTACAATTAGTCAGAAAAGTAGGCGTTCCAGTTGAATCTGAATTCTCTCTCAG
TGACAAATCCGTCACCGTTCTCATCCCAGAGTCTGAAGACGTGTGGGAAGTCCTGTGAGTTGAGGACCTCATCAGCTAC
TCTGTCCAACYCAGCCTATAGTGAGT
>Contig480 4273 reads, 888 bases
AAAAAAAAAAAAAAAAAAAAAAAAAAAAAAAAAAAAAAATAGGGATAACAGGGTAATATCACCAATTCCTTCTCCGGGG
CTGTAACTGTTCTTGACGCACAATTATAAGAGTTACAATGTCAAGCCTAAAGTTCGTGACGCTGTCGTCTGCACTGGCC
GCCATCTTGGTCCTGGCTAGTGGAATGGACGTGATGACCAGAGATTCAAAGAACTGGGACAAGTGTAAAAGATACCTGA
CTGAAACAACCGTCACCAGGAACGCACAAGAAACAGAGGTTATTAATAAGAGAATTGTCGGCTTCTTATTGGATGGCTT
GAAAAGTTTTGATTGTAACAAATGGAAGGATTACATTGTGGACTGCTTGAAAGACGCATACAACGAACAATCCGTATCT
TGGTTCAGTTGTATCAAATCTAAAGTGACTACGAACTTTCCATCATTGTCATCATTGTTCGGTAAAAGAGGCGAGGATT
TTCTCCAAGAATTGGAAATGATTGAAAGGGAAGAGCAAAGCAAATGGTCAAGATGTATGATTTCCAGGGACGTGAGCGA
AGTCAGCGATACCAAGTAGGTCAATGAGGAAAACATTTTGAGGTGCAGAGACCGAGGCTAGAGTTCAGCTAAACAACAT
GCGGTTTATTTATTTTAAATTTAAACATAAAGTTGGATGAAAGTTTAGGCACAATAAAAAAATAATCCGAGGAGCAAAC
ATTAAAAAATAAAGTGAACACTAGTTCTTTGTTGTTTATTTTAATAATACAATGAGATGTGTGTCACTTAGAAATTGCA
TTTTTTAAGCGCTGATCATATAAGTTCAGGGCTTGGCCCCACTTTTAAACATGAACCTGAAATAAATCAAAGCGTGTTA
TGTGTGAAAAAAAAAAAAA
>Contig481 487 reads, 302 bases
AAAAAAAAAAAATAGGGATAACAGGGTAATAAAAAAGGAGATAAATTAAAAGATAACCATAAATAAACCTAACAAAGTA
GTCGATCTCAAACCAGTAACATTTTTTGAATAGACCGAGAACTAGACGTTAAAAATGAGATCTTTGTTATATTTGGCTC
TTTTAGCAGTACTTCTGTTTGTCTTGGCCTGCAATGTACAAGGCGCAGCGTTATCCACTTGTGGCCCCATTCCACCGTG
TGCTGCTCCGCCAATGGGGTGCAACTACCACCCTGATGAAGACGGGTGCATAACTTGTCATATGG
>Contig482 14882 reads, 710 bases
CGGTGGCCCAGGCGTCCCACTTGGCTCTGGCCTCGAAGGAGAGAGCTCCAGGTCTTTCGCCGGTGACATCACCGAAGTT
GGCCTGCTTGAAGTACTTGTAGAAGATGAGGGCTCCTTCGTCACTGATCTTTGGAGTCACCTTCACCTTGGCGGCGCAA
GAACTGAACTGAGCTGCGAGGTCTGCCATTTAGATGCTGTGGATGATTATTACCCTGTTATCCCTATTTTTTTTTTTTT
TTTTTTCATGGTGAAAAGATTCTTTAATTGTTAACATCAAGAATATTTATCCTAGTCGATGTTGCCTCTGTGACGTCAC
TGACACTTGATGATGGGTTTACAACATCCGGGGTATTTCAGGGTTTCGTCAAAACTCAAAGTGCAGCCAGGTTCGTCAA
TGCTGACGGTGCCACAGGAATAACAACTGTATGTTTCTCCACCACAAGTACATTTCCCACAGCCTTCTTCATACCAGGA
GTCGCCTGCCTTAACTCCATCGGGACAACCGAATCCAATACTTGTGGAGCCCTGTGTAGAGTAAACTAGGGCCACCAAC
ACTGTCAGGATGAGAACCGCTTGCATCTTCACGTGTCTGGGGTAGTGTAGATATAGGTAGAGACTCAAGTCAACGCTGT
GGGCTAGTGTATTACCCTGTTATCCCTATTTTTTTTTTTTTTTTTTTTTTTTTTTTTTTTTTTTTTTTTTTTTTTTTT
>Contig483 52 reads, 223 bases
CCTGCTGAACCGCTCTTCCGAYSTCCTTGGCCTCGCAGTCCACAATCTTGATCTTCTTCTTGGGGGTGATGCCATTGTC
TTCAACGTCGACCTCAGCAAGCTTGTCCAGGAACTCCAATGATTCTTTGCCGATGACTTGACCGAAGGCAACGTGTAAG
TTGTCAAGGAACTGCCAGCTCCTGAAGGTGACGAAGAATTGAGAACCGTTGGTGTTGKGWGWTCG
>Contig484 160 reads, 394 bases
ATATTATTCGTCGGAAAGTTAATACTATTTTTGTATTCCTAGGCAACCACTTTTTTAATGCGTCATTTTCAATTGACAT
TGTCTCAATGAAGTTAAAGTGAGACGGTCCAAGATTTTAAATAAACAAGGTATTGAAAAATAAAGCCAAGCTAAGCTCT
ACCCCCTGTAGTCACGTGGTACGAGTGTCATCTCAATCAGCCAACCATAGTCTGCCTGTCGTCCCCTGCGTCTGGTTGT
TATCCTTCGCTAGACACTCATTGGACACTGGTAATAGTGTTACATCTAGATTCACCATAACAACAGCTCGTGCACATCA
CTGCTTTTAAATATGATGTTTGGGCTCGGGTCGCCCGTCGCGGCCATCTTGGTCACCGCTATGCTACGCCTCCTCGTG
>Contig485 504 reads, 443 bases
AATATGAATCATGACAGTCAAAACGAGACTCACTTTCGCCTATAGTTAACATATAATATTATGATTACGAATTTATTAT
TTTTAGGCCATTTTCATAATAATCACTCATAAATTAAATATTCAAGCCAAGTGTCCAAGTCCAAGTGTTCTCTTGGCAT
ATCCAAAGAAAAGCAAAAGTATCAGACTCAGACCAATACATATTGTATGTGCTACTGTTTGGTCAGTGTGGACTGTGTG
GTCAGGATGAAACAAAGTGCATGCAAACAGATTTTTGCCGTCAGCGCCATTGTTTGTGTTATTGTCTGCTGCTTTTAGC
TTTCATAAAAATCAACACTATGCATAATTAGTGTCACCTTCCTGTTTTAAGTGTTACCTACTGCCTAATACCCTGGTGT
CTGCCTCTGAAATCCTAAAATTTCAGATCGGAAGAGCGGTTCAGCAGG
>Contig486 10241 reads, 960 bases
GGGTCACATACAAGMTTTTACCCTGTTATCCCTATTTTTTTTTTTTTTTTTTTGGGAGGAAAACAATTATAATTTTATT
GGAGTTCGATAAACAAAGGACATGCGATCTCCTATCAAATGAAGGTTATTTGCCAGGCCCGTTTGTGTCGCAGTAGCAG
CTACTCTGCAATTCGAAGGATCGTGACTCCGTAACGGCCCAGCCATTCTTGCAGCCCACCCGTTTGAGCACGGTGACCT
TAGAGCTTAGGCCTTGACACAGGTGGCCCCGGTTTCCAACGATACACTTCTCGCATTTACACGTATGTTTGTAGACGAA
CCTAGGGAAGAAATTCTCTCCTAAATCTATTTCAATTTCGTCAGTCGGACACAACGGCATCGGGCTCCAACTCTGTCTC
AGCCCCATAAACTGGTCTGGGTTCGGACAACTCTCATCGTCGCGATGATTCAAGGGCAGTGGCAATCTTCTCTTGGTCA
CCTGAAAGGATTGAGGCTCCTCTTTGGGTGGACTGTTTGCATTCATGATTTTGGCTATCAGGCTACTATGAAACTCGCA
GGGGGCGTAGGTCTGGTACGTTGGAAGCGGTTGTGGCGCATGTTGGAAGTGGTCCGGGAAGGTCCCGTCAGTATCCCGT
GGCGGGGGATGTACGTAGTCTGGGTCTTGAAAAAATGGCCAATACTTGCCTCGTTGACGTGATGAAGATTGAGGTTTGG
AGTAAACGGTGTCTGAGTTTGGGCCTAAGAAAAATCCAGATGCTGCTTCCATGATAACAGCCAAAATTCCAATGGAGAT
GCAAGTCTGAGGTGTCATTTCTTCAGTATCAAAATTGAGGAGTCTATTATTTTGATTAAGTGTCTGATTTTCAAGTTTA
ACTGAAGAAAAATTTCTGTTCAAAGTCTTAATTTTCTGTAACAGATCGTTCCATCTACCACGTGAAATCAACTACTATT
ACCCTGTCATCA
>Contig487 6786 reads, 915 bases
GAACCGCTCTTCCGATCAGAAGACAACTAACTTGTACACAAATGCTTTCTATCTAATCTCTAATTCTTGGCTGGAAAAA
AGTTTGTGGGCGTTCAGAGAGATTTGACAATTTAATCATTTTTCAGGCAGCGGGTTTCTTTAAGTTGCCGATTGGTCAA
TCGGTCAACTAAACAGCGGGCAGAAATTTAATTCCCACTCGGCAGAGCCCAGAGCCAACGCGCCCATTGTAGCTTCCCC
CGTATATCACCCTGTTCATTCCAAGGTAAAGGTCATAGTTGACAGGACCCCCGGAGTCCGACTGTCCGTTGAGCGCGTA
CCACCCGGGGTTGGCGAAATAGTTGGTCTTGGTGGGGTCATGGTCTGCTGTCCAGATCAAGTGCTCGTCTCCGGCCACA
AGGGTCAAGTGATTGCTGTACAAATCAGGTATGTTAAAAGCCATTCCACTCCCACCATTGTCACTGAAGTAGCCGAGGA
TGGAGTTGGTGTTGCCTTGAACTTCGGCGTCCCAGCTCTGTGACATCGCATCACCGGCGTAGCCATTGTTGGTGCTCGA
GTCGCCCAGGTTAAAGGTCCAGCCCGAGGGATTCTCAAAGTCCAAGTCCAACACGAACCTCCGCTTACCGGCATCATCC
GGGGGTAAGACAATTTTGACAACACCAGTGGTGCTGCAACCACTGCCCACAAAGTCCTCTACTCTGATCACATTGGGGT
GGTCCTTAAAAGTTGACGTCTTAAAATCGTAGTAGGCGTCAAAACTGCTGGCATCACGCCTCTGAAACGTAGCAGAAAG
CTCAGCTGCTAGCACCTGTTTAAGAAGTATCCCAAGTAAGGAAGCGCTGAATATGTCCATATTTCCCACAAGCCTTGCA
ATAGAGATATCTTGTAGCTTTATTACCCTGTTATCCCTATTTTTTT
>Contig488 4608 reads, 883 bases
CCCTGTTATCCCTMYTWTTTTTTTTTTTTTTTTACTTTTGCTAAAATCTTCTTCGTTTATTATCAAAATGAATAAGATT
ATAAATTATATAAATATGTATGACAACTAAGCTAGATCGAATTAGCTACCATGTCTTGTCAAAAATTGGAGAGACAGAA
GCGATTCCAATCACCTTGACCGGAGTAACCGTGTCATTTCCGCTGCAGTAGCTCGTACAGTTTCAACGGCCATATTTAG
TGGTTGATGTCAGCTGGTGCAGGTCCCTCCCAGATCTCCTTGTCCCGCTTTTCTAGGTAGCTGTAGGGCGGGGCAGTTT
TCCTCCTGGCCACGAGCTCAAGACCGTCACGATATCCTCTTTTGGCGTTGATCAGAAGACCTTGACCTTCTTGACACAG
GTTAGCATAACACCGCATCAGTTGTTCACTATTCCGTGAAACCATTCGACAAAATCCAGGACAGTCCGGTTCAGATCGT
GTGTGACAAGGAAATGTCAATAGAGCCAGCAGCAGGCAGCACCAGAACATGACGGGACACTTCCTGTCTGATAGTGAGC
CTTCCATCGCAATCAGTGCCGCACGATGGGGGAAATACAAGAGTCTTTGCCGCTTCTGGAATAGGACAAAATAATTGAA
GTTTGACTCTAAGACTTATATAGAGCCGTGATGGGGCTGACGACTGTTGGTGACGGGTAACGGGATCCTCCCTGTCTTA
GATTACACAAGCAAACCTCTGATCGATGGCGACCAGGCGGCTGTCACATCGCAGTAGAAACTAGGAGCTGAGAACACTG
GGCAGTCCAGGGATGGTTCTGTCACTATTGTAAGTGGAGCTGAGAACATTGAGCCATCCAGGAGTGGTTCTGTCACTAT
TGTAAGTATTACCC
>Contig489 6716 reads, 843 bases
AAAAAAATAGGGGTAATAGAATATTCATAGACTTATCTTTAGAGCGGTTACTTGGACCCTAACAGAGGTTACAGACCTG
AAAGGAAAGTGAAAGGAACGTGATTTGGATTTAAAGTTTAAAATGTCTCGATCTGTCTGCCACTGTCTCCTCCTCGTCC
TGGCCACTGCTGTTTTCACTCGCGGGCAGCACAACCCTTGCGCTGGAACCGGAAGTGGCCCGCTGGCCGTCCGCCTGGA
GGCCAACATAAACGTCAATGACGCCAACCGGGACCTGGTCGTCTCCGGCGCCGAGATCACCAACGACCTGACCAACAAC
TACGACAAGAACGGTGACGGCTGCGTCACGCTGCAGGAGTGGACGGACGTCTGGCGTCGGTTCAAGTTCTCGGCAGAGT
ACGCCGCAGCCAGGCTCAAGGACCTCGGCGTCGACGTCACTTCCGCCTGTCCGCTAAAAGTGGACGCCTTCAGCGCCGT
GTCCATTCCACTGACCGCCTTCGTCAACGCCAACATCGACTCACTGGTCAAACTGTGTGAGGGAAACGTAACTCTGTAC
GACACCGTCTGCGACTGCTGGGAGTTGAAGCACGAGTTGTGCGTCCGTGACCCGTCCTTTCAGACCTACGCATCGTGTC
AAAAATACGTGTCTACGGTCATTGTCGGGTGATGAGGCAATACTTGGAATAAAACCGTAAAAGTGATAATAAAAATATA
TTTTTTAAAAATCAAAAAAAATAGGGATAACAGGGTGACAGGCTAATGATGGGACTTGTATGYGACAGAGTGACAGGCT
AATGATGTTGACTTGTGTGTGACANGTTGACAGGCTAATGATGTTGACTTGTG
>Contig490 2161 reads, 771 bases
GGGTAATCCATTCTCCGCGAGGCGCTCACCACAAAACCATCAAAAGGAAGCGTAGCTTGATCTTAGATTGAGTACTTGT
CGGATAGACTGTGGTCGTAACATCAACAGAGAGTTGTATATTCTCATTCGATTTCATCAACGGGTTTCTTCTCTGTTTG
GCTATACTGATAAAGCGTTACAGCCGTACGTATCAGAACCATGGCTCAATTCTGTGGCAAGTGGGAACTTATCTCTAGC
GATGCCAACTTTGAGGAGTATATGAAAGTTGTAGGTGTGTCCGAGGACATGAGAAAGTTGGCACTGACGGCATTAACTA
CCGGCTCGAAGCTCGTGCAGCAAATTTCACGTGACGGCACGACCTGGACTGTAGGGGTCATCACCAAGGAAGGGGAGAA
GGCGGATGTTTACGAGGAGGGCAAACCTACAGATGTGTCCACCCTGGATGGACGGAAGGTCACGGCTGTGTACACTCTG
GAGGGGGATGAGCTTGTGGAAGTTCAGAAAGGAAATGGGTTTGAATCCCGGAACGTGAGAAAAGTGAACGGTGATACTT
TAACTATGACGTTGACGGCCAATAACTCTGTGACGTGTGGAAGAATTTACAAGAAAGTGTGAACACTCACGGTGTGTGA
ACACTCACGGTGTGTGAACACTCACGGTGTGTGAACACTCACGGTGTGTGAACACTCACGGTGTGTGAACACTCACGGT
GTGTGACATCAAGCGGCTGAATCTCAACAAATGAAACCGACGGACGTGCAGAGCGTCGTG
>Contig491 1327 reads, 453 bases
GGGTAATCTGACACTACTTGACCACCCTGNGRGTACTTGACCAGACTGACAGTACTTGACCASCCTGACAGTACTTGAC
CAGVCTGACAATACTTGACCAGACTGACAGTACTTGACCAGACTGACAATACTTGACCAGGCTGACAATACTTGACCAC
CCTGACAGTACTTGACCAGACTGACAATACTTGACCAGGCTGACACTACTTGACCACCCTGACAGTACTTGACCAGACT
GACAGTACTTGACCAGGCTGACAATACTTGATCAGACTGACAATACTTGACTAGACTCACAGTACTTGACCAGACTGAC
AATACTTGACCAGGCTGACACTAATTGTAGACTGACAATACTTGACCAGACTGACATTACTTGACCAAGCTGACACTAC
TAGAACAGACTGACAATACTGTGTCAGATGTAAGTGCGGGCTGTACCGATGTAAGTGC
>Contig492 11025 reads, 1445 bases
GGGTAATGTAGRRGTARTGAGTTTCCGATTCAATTCCATGCGCAAAAGTTTCATCACTAAAGTAGAGGATAGTGCTCTA
AATAATGGCTCGTATTTTTAATAATATTGGAAAATTAGGCTTAGCTCTCGCTGTTACAGGAGGTGTAGTGCAATCTGCA
CTCTATAACGTTGATGGAGGACAAAGGGCAGTAATCTTTGATAGACTTCGAGGAGTTCAAGAGGAAGTAGTTGGTGAGG
GCACTCACTTTCTTATTCCCTGGGTGCAGAGGCCAATCATTTTTGACATTCGTTCCAAGCCTAGGAATGTCCCATCAGT
TACAGGAAGCAAAGATTTACAAAATGTCAACATCACCCTCAGGATCCTGTTTAGACCCCAAGTTCAAGCTCTCCCTAAA
ATTTACACAAATCTGGGCATAGATTATGATGAGAGAGTTTTACCCTCCATCACAACTGAAGTTCTCAAAGCTGTTGTGG
CTCAGTTTGATGCCAGTGATCTGATCACACAGAGAGAGTTGGTGTCCACCAGAGTTAGTGAAGAATTAACAGAAAGAGC
TTTGCAGTTTGGTATCATTTTAGATGATATATCTTTGACTCACCTTACATTCGGTAGAGAATTCACAGAAGCAGTTGAA
GCCAAACAGGTTGCACAACAAGAAGCAGAGAGAGCTCGTTACATTGTAGAAAAGGCAGAGCAACAGAAGAAAGCCGCCA
TCATCTCGGCAGAGGGTGATTCTAAAGCTGCCGAGTTAATGGCTCACGCGTTTGGTAAAGCTGGTGAAGGTCTTGTTGA
GCTGAGGAAGATAGAAGCAGCCGAGGACATTGCCTTCCAACTGTCCAAGTCTAGAAATGTGGTGTACCTCCCACAGGGC
CAGCAGACTCTGCTGTCCTTACCGCCCCAATAATTTAGATGTTGTTTCAATGATTTTAGTTTGTGATTGGAATTTTTGT
ATTTTATGCAAAGAAATAAATTGATATGCCAACAAAAAAAAAAAAAAAAAATAGGGATAACAGGGTAATAGCAAGCTCT
GTATCTCGGCAAAGATCTTTAGGTTAAAGATTCCGAAAACTTCCCAGAAGATGAATCGTGTTTTGTGTTTGGTTCTGAT
TGGGGCAATCATATGTGCAGGTATGAGGGCAGGAATGGCAGATCAAGCCGGCCAAGGAAAACGCAGCTTCCCTGATGAC
GAAATGATTCGACGAGTTTACAGAAAGGACGACTTCCTAGATGAACGTCTAACGGACGAAGGAGATATGCTCATGTATG
CCTAGCCACAAGAGGCACTGTGCTGTGAGACTCGGGAATAATTTAAGTTTCAGCTGGCGGGAGGAGCAATAAATTAAAA
TGTTGAAACAAAAAAATAAAACAATCAAACTGAAAAAAAAAAAAAAAAATAGGGATAACAGGGTAATAAGCSCGCCTGT
CTTTTTACGATATTTATTCGTTC
>Contig493 3015 reads, 575 bases
TTTTTTTACACAACAGAGAGAATATTTAATACATTGAAATAATCGTACCAAATAGAAACGCATTAAACAATATATGGTT
AACACTAGCGATTAACATAGACAAATAACTAAAACATTAGACGAAGATTAAACGGGTATTATATGAATATGACCCAACT
TCCCTTCTGGTCACTCTGGTCAGTGGGTGTGGTCAATTAGATGAATGACGGGTCTGTCTCGCGTCACTGCTTCTTTCTG
CTCCGCAGTCAGGCACGTCTCCCAATTAGGTCATGCGATCTCTTTCCCGGAGGTCAGTCCGGAGGTCAAGCCCTTGCTA
TGTGAACTGAGTGACAGCTTGGTCTGTCCACAGCGATGATCGTCCTCAACAATGGTTCTCACGTTTGAGACAGGGTCAA
GTTTTCCCCTTCCTGGCAACACCAGCACGTCTTCTGCCTGGTCTGCTCCTCTACTTTGTTGGCTTGACTAATGGTATTC
TCTAACATACTAGCTTCTTTTTATTTGTAGTGTTCGAACGTCTAAGAATTAATAAATATTACCCTGTTATCCCTATTTT
TTTTTTTTTTTACCATTACTAA
>Contig494 1069 reads, 326 bases
GGGAACAATTGTGGGACCAGTAGTGGGACAAATAGTGGGGCCAGTAGTGGGACCAGTAGTGGGAACAATAGTGGGACCA
GTAGTGGGACCAGTAGTGGGACCAATAGTGGGACCAATAGTGGGACCAGTAGTGGGACCAATAGTGGGACCAGTAGTGG
GACCAATAGTGGGACCAGTAGTGGGACCAATAGTGGGACCAATAGTGGGACCAGTAGTGGGACCAATGGTGGGACCAGT
AGAGGAACCAAAAGTGGGACCAAAAGTGGGACCAATAGTGGGACCAGTAGTGGGACATTACCCTGTTATCCCTAGCCTA
TAGTGAGTCG
>Contig495 4231 reads, 827 bases
TTTTTTTTGAAAAACTACATTCTATTTAATGTTATTCAAATTAATTTTGTAATAAAATTTTGACATTATAATTTCCAAA
TCAACCTTGCATCTAGAAATATAACAGAACATTTTTTATGTATATAACCCAGTATTTATTACCTATACGAGTAGAGAAA
CAACATGTTTTCACTGACAAAAAGTTCAAAAACAAGATAAACTTTGAAAATCATTTAACTTGCTCTCTTTTATTTTAAT
TAATCTCTTAATTTAATTGTAGTAAACCACATGTACACATATCTAGAAAACTTCACTCATCACAGTCTGTAGCTTATCA
TAGCCCTTCAAATGGGTCATATTTTTCAGAATTAGCTTGCAACTCTTTCAGTCTTTTCTCTTCTGCCGCCATTTCTGCT
TCAACTGCTTCTTGTATTTTAGCCTTTTGTTCTGAACTAGGTCCTGGCCATACAAGATTAGGTTCTGTAAAGTTAAAAG
TTGGAAACTGAGTCATGTCTACACCTTTAGCACCAAAGGCTCTTTCCAAGTTACCAAGAACTTCTTTCAGAATTGCCTC
TGATTCTGGCGTTGCATCAACCAACTTTCCACCTTTAGACTTGCTTCGATAGTCTCTAATCTTATCAAGAAACAATTGT
TGTATAGGATCTTGATTGTGTACTACAGCTGTAATACCAAAGTTCCTTTGTGCAGTGGTATTCACTAAAGGGACAATTT
TTTGCAGAACTTGACGCAACATTTTGGCCAAACTCTTCAGGGCAACACTGCCGACCCATTACCCTGTTATCCCTATTTT
TTTTTTTTTTTTTTCGACAAATCTATACCGATGAAAA
>Contig496 7628 reads, 1356 bases
TGTTCAAATGGCATTGGGGTGMCATAGTTTCAGCATCTTGACGAGGTAACCTGTGTATTCACTGCAGCATTTATTCTAG
TCTATTTACCTATAGGTGATCTTTAATGATGTTGCTACTGATCGATTTTGGCTGCTGTCCTGACTCTCGCCTCTGCGAG
TACTGAAGCTGAATGGATTGTTTTCAAATCGAGGTACAACAAAACTTACTCAGGAGATGATGACGTCATCAGACGCTTT
ATTTGGCAATCCAACTTGAAGATAATCGAAGAGCACAATGAATTGTATGCCAAAGGGTTGAAGACTTTCTACCTTGGGG
AGAACAAGTATGCAGACTTGACTTTAGAGGAGTTTTCCAGAAGCATGAATGGCTACATAAACCAGGACAACATGGAGGA
ACCAGTTACAATGGTCAGCGGGATGTACAAGGGTGTGTTACCAGACACAGTGGACTGGAGGGCGAAGGGCGCGGTGACA
GGTGTCAAAGATCAAGGCAAATGCGGATCTTGCTGGGCTTTCTCCACGGTTGGATCGGTCGAAGGTCAAAATTTCATGG
CCAGTGGAAGTCTAGTTTCACTTTCAGAATCAAATCTCGTTGACTGCTCAACAGCTAACAAAGGCTGCAATGGTGGAAA
CATGGCGAGGGCAATGCAGTACATCATTACTAACAAAGGAATAGATACTGAGTCATCTTATCCTTACAAACCCCAGCAA
GGGAATTGCCGTTATTCATCCAGCAATATCGGCGCACAGATCAGGTCATACAGCAGGGTCATGGCAGGAAGCGAGGATG
ACCTACAGAAAGTTGTCGCCACGGTCGGCCCAGTGAGTGTTGCTATCGACGCCAACCACAACAGCTTCCAGCTCTATAA
GGGCGGTGTGTACAATGAGCCTGCCTGCAGCACGTACCCGTTAAATCACGGCGTCTTGGCTGTAGGATATGGGACAAAC
GGAAATCAAGATTATTGGATCGTCAAAAACAGCTGGGGAACATCCTGGGGTCAGAGTGGCTACATCTTTATGTCTAGAA
ACAAGCGAAACCAGTGTGGTATTGCCTCAAGCGCCGTTTATCCGATTGTTTAAAAATATCAACTTGTTGGAAATGTTAC
ATGTGCTCTTTTTTCACATTAAAAATATTTTTTGTTTACAGTTTTAGTCAGTGTCCCATGTTTATGTCCCATGTCTATG
TCCCATGTCTATGTCCCATGTCTATGTCCCATGTTTATGTGCCATGTTTATGTCCCATGTTTATATGTCCCATGTTTAT
ATGTCCCATGTTTATATGTCCCATGTTTATCATAGTGCCCTGTTTATCATAGTGCCCTGGACAAAAAATCAGATCGGAA
GAGCGGTTCAGCA
>Contig497 4555 reads, 554 bases
GGCTAGGAAAAAAAAAAAAAAATAGGGATAACAGGGTAATAAGATACACAAATAGATCCGTGATAGTAAGCCGCTGATT
TGTTTCATCCTTATAGATACAGAATCCAACTAGAATGAAGGAACTACTCAGAAGATTAGTCCTGTTTTCTCTTATTGGT
TTCCTGGTAGCCGAGAAGTGTGTGTACAACGGCGTCATTTATGCGCCGGGTGAGACCTACAACAAAGGACCCTGCACTG
AGTGTTACTGTGATCAGAAGTTTGAGGCGGACTGTAGCAGCATCCAGTGTGATTGGCCCCAATGTGACAATGGCGTCTG
GCCCATTACATTCGAGGGTGAATGTTGCCCTGGTTGTCCTTAATGTCAATAATAGCTTCATATAATGAGAAAAACAGTG
TTAAATAATACACATTTCAAACTGTACTTTTCTCGCTGACTTTATAAACTCAAAGTTTAATAAATGTTCATGTCTTCCC
ATTTATTTTGTGTCAATCCATAGAAAAAAAAATTACCAAAATAAAAACATAAGAATAAAATCAACAAATGTAAATAAAA
A
>Contig498 5264 reads, 673 bases
AAAATAGGGATAACAGGGTAAAAAAAAATAGGGATAACAGGGTAATCTTGTATCTGTTTACTCGCCTGTTACTCTGGAC
TCCAGCTAACAAAGTTAACAAAAATGTATAAGGGAATTATTTGTGTGCTGGTCTGTGTCTTTGCAGGTGCTATTGCTCT
GGTTGGAAAGACCTGTACAGAAAACAGCCAGTGTGACCCTAGTGAATGTTGCCAGATATTGAACGCCTTCATGGTGGTC
AGTAAGCGTCAGGCCCAGGCCATCAGCTTGTTCCAGAACCCAACAAACGGAACCTGCCAGAAGTACCGACTCGAGGGAG
AGAACTGTGGAACGTTCGAGAAGATGAACGGCTACTGTAGCTGTGAGCCCGGCACCACGTGTCACATGTACGAGGTTCC
CCTGGCCTCGGCCGTCAACGCCAGGATGATCGTGGCCCCGCGACCTGGGTACCAGTGGGTCTCAAAATGTGAGAAGCCA
ACACCGGCTTAAGCGTTCGAGAAAGTCACTCGGGCGAGCTGCCTAGCTAGCCAGTGTCAATGCTATCCACAAGTCATTT
AAACACGCTTAGAAAACTGTCAATGTTTCCGTACAACATGTCAACTCTAGAAAACTGAGTACACTTGGTGTGTTATAAA
AAAATAAAATATTGAATAAAAAAAAAAAAAAWATAGGGATA
>Contig499 984 reads, 468 bases
GGGTAATCTCATCTATGTTGCCCTGGGTAATCATGACCCACTGATGTGCTTGAACTGAGGCTCATCTATGTTGMCCTTT
GACATGTCATGACCCACTGATGTGCTTGAACTGAGGCTCATCTATGTTGACCTTTGACATGTCATGACCCACTGATGTG
CTTGAACTGAGGCTCATCTATGTTGCCCTTTGACATGTCATGACCCACTGATGTGCTTGAACTGAGGCTCATCTATGTT
GACCTTTGACATGTCATGACCCACGGGTGTGGCCGCCACCCAGTAAAGTTTGGCCACCACTGTACAAGCTCATACCTGT
CATATATCATCATGAAACATTTCTTACTATTAAAATCCAGTTGACACTATTAGCTGACCTGTGTACTCATAACCAATTA
TTATTTTGTATTCCCAAGGTGCTAAGAGAAGTAACTTTTGTTTGTAGTGTCATCTGGTGAGATCGGAAGAGCG
>Contig500 9974 reads, 891 bases
TAGGGATAACAGGGTAATAATCTGTTCGCCATTTCACAACTGCAATGAGAGGATTATAAATAGACTTACATTATCTAAT
TTAGTTATTCTTCCAGGCAGACATAATTCCCAGCTTTGTGAAGCATAAAACTAAACGACTGAAAACAAAGAAATGACCT
TCCAATCTACTGCATTTGGACCTGAAACTATTCTGTGACAAAAGAGACGGCTACACTAAAACCACGAATTGTATTGTGG
ATAACTTTAACCGTTGCCAACTCTCGGACGGCGCTCTTAAGATCAACGGGTCTATGCTCCAGACAGCCAAGACAATGGA
CATGATGTGTGATGACCCGAACATCAAGTTCGACTGTTTCGTCCAGCTGGCCAGCACCCACGCCACTGACCTCCAGGCG
TGCATCACCACCAAGTACGACTTCAGCAAGGAGCTGCTGGTCAAGACGATGCAGCAGGTCACGTGCGAGAGTGCCCACA
TCGGATTACAGTGCGCCTATGACATCATGAAGTCATGTGACGAGCACACGGCGAGGGTTTACCAGACGGCAAGCGCCCT
GTCAGTCCCAGCGATCTGCACACCGACTGTCATCTAGGAAAGCGATGGGAGATTCACCAGGGGTGTTCATAAGTGGTGT
TTATAAGTGGTGTTCTTAAAAGTGGTGTTTTTTTTATTCATGATGGGCTCCGATTTGTACGTGTCATTTTGCAGGTCGG
AAAAAAATTCACAACGGAAATATGAATGTTAGAAATGAAAATATTTAATAATATTTTTCTAAATTTGATAGATTGCTGG
TAAGAAATATAATTTCATGACATTCCTGTATGGTTAAATAAAAAGAGACAATCTGGCACATATCTGTTTTATGGAACCG
AAAGATCGGAAGAGCGTCGTGT
>Contig501 2950 reads, 454 bases
CTCTTCCCATTCATTGTTACAAGTATGTAAAAATAAATATTGCTAAGGCGCTTTCTTTTTGAAAAAACTAACTATACGT
TTATAACCGCTCTACTCTCGGTGCCATAATACTTTATCCATGGTGCCCATGTCCACCGCCATGACCTCCACCGTGACCT
CCACCGTGACCCCCTCCATGACCTCCACCATGACCTCCGCCATGACCTCCACCATGACCTCCTCCATGACCTCCGCCAT
GGCTTTGAGGTGAGCCTAATACAGCAAAGTTTAAGAGACAGACAGTGAGGAGCACCAAGAAAAACGTTAACTTCATTCT
GGCTGTTGACCAAACAGCTCACGGTACAGGACAGCTAACGTTGTAGAACAGCCCCCGGAAACAAGAAGCTCCAAGTACG
TTCAGTTGTCTGAGTGTCGAGTGAGTGTATTACCCTGTTATCCCTATTTTTTTTTTTTT
>Contig502 6019 reads, 556 bases
AAAAAAAAAAAAAAATAGGGATAACAGGGTAATGTCAGATTGGAAATTTGTTATTTGTTGAATACATTGACGTTGTAAC
TCAGTAACATGAACATTGTTACGTCCCTTGGCCCGTTGGCTATCATTTTGACAGGAGTTCTATTTGTTACTATTTCAGC
AGATTGTCCCAACGGAATGAAAGAGGGACAATCAGTCAGTCCCGAAGGGAGATGTAGCAACTGCACGTGCTACAGAACT
GGCCGGAGGTCAACAAGCATCAACTACATCTGTGAAGAATGTCCACCGAAGCCATATTATTTCAACTCTAACTGCACCG
TCAGCTTTGACAACGCGAGACCCTTCCCAAGGTGCTGCGAGCCGGTCCTCACATGTAATAAAATTCAAGACGAACCCAG
CAGGAACAAGGAGAAAAGGGAAGGTACAAACTGAGTATGTTTAGAACCGCCGAGGAACGTGTTTCCTTTGATAAAATGA
AAATAATAAAAATTTTGGCGAGAGAATAAAGATATGTTACGAGACGATAAAAAAAAAAAAAAAAATAGGGATAACAGGG
WAA
>Contig503 4809 reads, 557 bases
ATACGTTRCCTTTCTTTACTTAATACAGCAGCCACAGACGAAATTCCCACTTCTGAAATGTGGTTTGTGTATACATTGA
ATCATTCTGTTGAAACACGATCACAAAGCCATGTATGTCCACCGTCTCCTGCTCGTACTGATGTTGTGCCTTAGCATTG
ATGAAGGTATGTCTCGTAGCAGGGTATCTAGGATCGGTAGTGGCTATTACCGAAGCAGGAGTAGTAGCAGAAACAGCGC
TAGTACCTTGATACGACCTATAACTGGCCTCCCCTCACCATGGTGGCAACTGACAATGGGCACTGTCGTCATGGCAACA
TTCAAACCATCAATTTGTTTATAGCGTCTCCTACGGCTTACTTTCCCCTAGGTACCAGTTTGCCTTGGTTTAAAAGAAT
GGAAATTGTCACTGAGGGATACTGTTGAATTTCTATACTTTGTCATCAATTTGTTTATAGCGTCTCCTACGGCTTACTT
TCCCCTAGGTACCAGTTTGCCTTGGTTTAAAAGAATGGAAATTGTCACTGAGGGATACTGKAAAATAATGGCTTCAGTA
AAAT
>Contig504 14114 reads, 1103 bases
GCTGGATCTGTTTGGGAGTTTCCTGGTAGTAGTTTCTCTCGTCACGTGACTTATACCCTGTTATCCCTATTTTTTTTTT
TTTTTTTTCATTATGTACAAGGAAATTTACTTGTAACTAACTTTGCATCATTTTTTGTAGGAAACTTCCCTCAATCCGC
TGGCATCATAGGCCCTAAAAAGGTTGTCTCTTGCACGTTCTCTGTTGAAGTTGCCCCTACTCAGCGCCGCCTGGGCCTC
GAACAGGAAGTACAAGATGGGGATGGTGTCCAGCTCCGTAGACGGCTGGTAGTAGACAGGGCTGGTTTGATAGTACCAA
GGGTCAGTCCATGAGTAGCCGGGACTAGTTTGAGAGTACCTGGGACTACCTCGGCTCGACGAAAGTTCGGTGAACGTGT
TGTTTCCATTGCCATAATTCGGGCTCGTCTGATAATCCCAGAACCTTCCATAGGCGGCGCCAGCACATTTGTCCTGGTA
GGTGTCCAGATAGTTGCTGTTGTAGGAGACGAGTTCAGTTTGGACGCCGCCGCTGCTGCTCCCGACCCCGCCGCTGGTT
ATGATGGCAGGTTGATGGTCGTAGCGAACGGCATTGATGTGGACCTGAAAACCGCGGGCCGTGTTCGACCCGTCTGTCC
TAAAGGCGACGGTGAAGTTCCTGTAAGGTGGCAGGATGTAGGTGAACCTTTGATTGACAGGCCAGTTACCGCAGAAATC
AACTCCGCCGACGCAAACTGAGTCATAGCTACAGGAACGTGACTCAAGTTCAAGGTCAAAGGCGTCAAATTGTACGTTG
ACTGTCAGAGGCTCAGCACTGGACCTTAGGGTCAGCTCACATCTTGTGTTCGACAAGTAATCGCTGGAACCAAAATAAG
GGCTTTTCACATAGATGTTAGATTGGTCGGCTAGTTGGGCCTCACTGTCCACGCATAGAACGAGATTTGGGACAATCTG
TCTCGTGTTAATCACGTGAGCGCATGCAGAGACCAGCCAGGCACTGGCCAAGACGGTCACGAGGATATATCCCATCATG
CTTTAGTTAACACAGCCAGTAAGTGTAAGGTTGCTATATTACCCGAAGAGCGTCGTGTAGGGAAAGAGTGTAGATC
>Contig505 245 reads, 303 bases
CGCTCTTGCSATGTCCCGGAGACAACCTCGGACAGGCGACATCAGTGGAGCTGAGCCCATGTCCAACACAACCTTGTAC
CTTTAGTCATGGGAGCACAGTCACAGTGGTCATAGAGTTTACTGCAGTTAACGATTCCATCAATCTCGACTCTAAAGTC
TATGGTATCGTTGAATCTATCCCCGTGGAGTTCCCACTGCCCAATGGAGATGGGTGCAAGGAAAGTGGAATAAACTGCC
CTGTGGTCAAAGGTCAAAGATACAAGTATACGTCATCTTTTCCAGTGCTTRAGAGCGTCGTGTAGG
>Contig506 8066 reads, 1008 bases
TTCGTTGTTGACWTATTTCCCTGTTATCCCTATTTTTTTTTTTTTTTTTTTTAATATTTTCAATTTTAATTAATTTCTA
GGCTAAAACGTATCAGAAAAGAAAACATCTGTTGCCAGTGGAAATTGTTGGACTCTACTTGGTTAGACTAGCGAGAATT
GACCCAGTCAATGTACTCAGACACACGAGTGTACACACTTGGATAGTCACCACTGCAAGAGCTGACACCCCAGGAGGTG
ACACCAGCGAGAAGACCGTAATTAGTACCACACATCATTGGGCCACCACTGTCACCATTGCAAGCACTTGGGCGAGTAC
CAGCTGGGTCAGAAGCCTCGAAGACACAAATGTGTCTGTCAGTGACTGAGTTACCCCAGTAAGATCTGCACTGGGCGGT
GGTAATCTTGGTGATGTAAGCCTGCTTCAGGTGAGATGCTCCACTTCCACCGCCAACGGTGCGACCCCATCCGGTGATG
ACGCACTGGGTGTTGGCGAAACTGGATCCTTGGGGTGCAAGTGAAGCGGGCTGCACGTTCTTGTTGTAGGTGAATGAGC
TGGTCGTGCGGAGAACAGCAATATCATTGGGATAGCCTGCTGCGTTGCCGTTGTAGTTTGGGTGCATGGTGGCGGTAGA
CACTGCGATCGTCTGCTCATAGGCGTTAGGAGCTTCATACAAGTTGAGGACGCCGACCTCCACACGAAGGTTACGGGCC
TGTTGGCCATCGATACAGTGAGCAGCAGTCACCAACTTGTTTGGTCCAATGAGAACAGCACCACAGATGTGATACCATC
CATATGGTGCTTGGTACAGTTGAAGTGAAGCCTGGTGTGGGTGGGCATACAGCTCGGCTTTCTCACCATTGACAATCCT
CTTGTCCAGGTCATCCTCGGCCAAAACAATGGCAATAACACAAAGAAATACAGCAACTGTCTTCATTATGCAGAGATTA
TCTTCTGTAACCAATGAAATCGGTCATTGATTGAACTATCCCTGTTATCCCTATTTTTTT
>Contig507 392 reads, 356 bases
CGACTTAGTGGTGACATCACCATTGTTTACGTGTGACATCTGCAGCTGATTCCAATCACTACATGCAAAACTGCACTGC
CACCCTCTGGGGTCACTTGTGGCTGATGTCAAGGCCAAGCTCAGGGACAAGGCAACTACCAGTTTGAGAAGCATCTTGA
GTTTGATTTTATTTGTTGAAATCTCACCTCTGCTCTAGAAGAAATCTTGTTTTATGGTGATTGATCCTTTGAGAAAAGC
AGAGCTATTGGTCTGACTTTAACTTCTCACTGCTAGTGTCTGTTGTTAGTTTGATGACTTTGAGAAATGCAGAGCTATT
GGTCTGACTTTAACTTCTCACTGCTAGTGTCTGTTGTTAG
>Contig508 5911 reads, 1157 bases
GGATAACAGGGTAATTGACAGCTCTGGCCTACTTCTTCATTACACACCAAATAGACGACCCTACGATGCCGGGATTGTT
CTGACTGGATCAAGTGATTTCGTCATTCCCCCAAGGCAGGCGGCCATGTCTGTTGTCAGCACGTGCACGAGCGGATGCA
CGAGGTCAATGTTCAAAGGTCAAGTACAGATCACCATGGCGTGGAATCACATGCATTACGCTGGCATCAAAATGAGCAT
CAGGGTGAATAGAAACAAAACGCTGCTCACCTACTTGACCAATGAGAATTTCTACAGTTACGACAGCCCCAAGGTCTAT
TTATACAACGAGCAGCCCATCGTCTTGTTGCCAGGAGACGAACTCATCACCAACTGCACCTACACGACCAGCAAGAGGA
ACCACTCCACTCTCCAAGGAGAGGCAACGTCAGATGAGATGTGTTTCGGTTTCCTCACCTACTTCCCTAAGTCAAATGT
CTCTAGTGAATTCTGCTTAAGCGCCGGACCAGACATAAGTTTATGCGACTCGTCGTCTGCTAGCAGTCGCGGCTGCCCA
AACATGTTCTCCTACTACAACAACATGGCTGTGAACGCCTCAAGTTTTTACCGCGAGCTGGTGAAGAACTGCAAGCCCT
TTAGCCCGTGTCTCAGAGAGTGCGTGGACTACCTGGTACAACAGAAGACCAATGACGCGTGCCTGCGTGGTGACATGTT
CGAGTTCATCCAGAAGCAGATGTTGAGTACCCACAACATAGGTCACGACATGATGGCCCGCATGGCGTCCTGTGAGACG
GAAGTCTACCTGGCGATGAATCCAACGCCCAGTCCTTACGCGCAGACGACCCCCCGATACTATAACGATGATTGGGATA
CCACGTCACGAAATAAAGATGACGGAAACGGCTTCAGCTCTGCTCCTCTGGCTAGAGTTACGTCCTTGCTGGTTGCTCT
TTTAGCACTGCTGCCAATAATGATTAAAATCTAAGCAATTTTTTAAAAGAATATTTTAAAAAGTTGTGATTTGAAACCT
TTTTTTCAAACTTCTATTTTTTTAAAAACATTTATTTTCAATTTTAACAATAATTTTTAACATCAATTATTAAATTTTC
TAAATAAACATAGCAACTACTTAAAAAAAAAAAAAAAATAGGGATAACAGG
>Contig509 498 reads, 238 bases
GCCCAAGGGTAATATCCATGTGCGGGGACTTTGCCAACCAGGCTGTCACAACCTTTATGTCACCAGCCAACCAGGCTGT
CACAACCTTTATGTCCCCAGCCAACCAGGTCGTCACATTCCAAGATACAAATGGTAAAACTGTGAAAAGAAGTCTCATT
GAGCTGACTGAGATCATTAAACACTACACAAAGAGATCCGCCAGTGATTACAACAACTACGGATGTTATCTTGGCCTGT
G
>Contig510 7025 reads, 670 bases
AAATACTATAAAAATATTGGGTTTTTAGAATTTTATTTCAATGATTTACGTGTCAAGAAAATTATTTAATAAAAACTAT
TAAAGGATTCATGTGCATTTTTAGTTTTTGAAAATATTATTTTGCTTTAATTTATAAATTGCGGATAAAAAATGATGGA
GTAAAATTGGCTTTCTAACTTTTTGTATAAATCAATGTTTCCTCTGGACATTGTTAAAAACAGGAGGACTTGATGCCTT
AGTCTCTGCCACTGCACAAGCATTTGTATTGATTGCCTCGTACACGAGGGCACACATTACGGGGAGCAAGGAGACACTC
TCCTTTATGGTAGGATGTTTGTCTACACTCTTCTTCGCATCCGAAGTTAGGATCGACAGGATCCGGAAAGGTTGATTCA
TGGCAAGCACGAAGCCGTGTGTAACAGTTACCCACATATCTCCAACCTGGACCGTGTTGGACATTTGTACAAAAACATG
TGTTCAGAATGAACAAAACCACTGCTAGCGTCGTGAGGACTTTCATCATGACTTACTTTGAGTGATAAATATAAGACTT
ATAGTGTTAAATATTTCACTTTACAGCGTTAAATATTTCACTTAAAACGAATGTGTCAAATGGCTAACTCACACGGGGC
ACACATATTACCCTGTTATCCCTATTTTTTTTTTTTTT
>Contig511 2527 reads, 578 bases
CGCTCTTCCGGTSACTGACTTAAACCTTCAGTCAGCAATCTAGGCTAGTGTCCTTTAAACCAGTCCATTTCAGTTGAGA
CTTTAGAACACAAAAAGAAAAAATTAACTAAATATTTTAATTTTAATGAAATTTTCAAATTGGCTTAGTTTCTTTCAGA
ATTCAGAATTTGAACAAAACGATTGTGCACCAGAAGCATTTCACGTGCCAGCTCTAGATTTTTCTGTAAAAGATGCCTC
ATCTTGTCCTGTAGGCGATCACGTTCTGCAAGGACATCAGGAGTAATTTGAACCAAACGATTTTGGACCAGAAGCATTT
CACGTGCCAGCTCTAGATTTTTCTGTATAAGATGCCTCATCTTGTCCTGTAGGCGATCACGTTCTGCACGGACATCAGG
AGTGAATTCATATGGCTTTGTGGTTTTCGGGGAGGAAACCATTCTACTGCCCCTGGGAGACATAACCTGCTCTCACCAA
ACTGGAAATCAAGTAATGTATCAATTGAAACAATAAAAATGCTTGGCTTGATGATCAAGGCTGATTTGCACTACTTACC
CTGTTATCCCTATTTTTTTTTTTTT
>Contig512 4637 reads, 528 bases
AAAAAAATAGGGATAACAGGGTAATGAAGTTACTCGAGCTGTTTGTTTTCCCACGCCACAATAGAGTCATTACAGTTGA
CTGCATCCCTTGAAATATTAACAGCTGTTTTTGTTAAGTAAAAAACAAACAAATAAGGTTTTTTCGAGGAAGCCAGACA
ATGATCTATTTGTTCGCCCTTTTCACTGCCCTTCCGGCTTTGGCCATTGGTCAACTGGACGTCAACGTCGTCGCCGTTG
ATGCCTTCAAAGATTTGGACAGAAACAGAAATGGACACTTAAGTATATCCGACTTTCTCCGCTACTTCAAGACACTCGA
CGCCAATAATGACCAAAGAGTGACCAGGCAAGAGTACGTCACCGGTACAGGCAACGGTTTCGGAGATAACCCCCAGTAT
CTGATGGGGCTCAACCAACAGTTTGATGAATTGGACTCAAACAACGACAACCATCTGGACATCACGGACTACGACCACC
TTTTCAACGTGATGGACACCAACAATGACGGTCAGGCCGAGCGTCGTGTAGGGA
>Contig513 61 reads, 284 bases
CGGGCAGTCCCCACGAGTCTCCGTCAACATGGTTGTCTGGGCAATCACAAACTTGACATCCGGGCAGTCCCCACGAGTC
TCCGTCAACATGGTTGTCTGGGCAATCACCCATTCCATACATGTCTGACAAGCCAGATCTTTCAGAAGTCTCCAAATTC
GACAAAAACAAGTTGAAGAAAGTCGAGACAGCGGAGAAGAACCCACTGCCTACCAAAGAAACAATTGATCAGGAGAAGG
AAGCTTAATATGGATCGGAAGAGCGTCGTGTAGGGAAAGAGTGTAGA
>Contig514 3521 reads, 780 bases
CCCTACACKAVGAAAATGAGTTAAACCACATTATAAAATACTTATTACTTGTAACCTTTTTACTGCTGTGGTGCCTCAA
TATCAGTGGAAGGGCTGGTAAGTTAAATTGCTGCACATTATCTATCAATGCTGTAATGTGGATATTTGGTTATGGCTCA
TTAATATGGAAAGTAGATTTTCCATATGAAAAAAAAAAAGTACCTGGCTATGTCCGGGGCTATTGCAGACGGTTCTGGC
AAGGCAGTGAAGATCATCGTGGAGTACCTGGAAAGCCTGGGCGAGTTGCAACTTTGGTACCATCTGAAAATGAAAATGA
TGCTGTCTGGGGCATTGCATACAAGATTCCAGCAGCTCAGGCCAATGAAGTGAAAAGTCACCTTGACCACAGAGAAAAA
GGTGGCTACCAGCAGACAGAGGTAACCTTTTACCCACAGCAAGAAGATGAGAGCCCATTTCAATTGACATTATACATAG
GAACAGAGGACAACCCATATTTTCTTGGTCCTGCGCCTCTTGAAGACATGGCCAGGCAGATTTTCCACTCTGTTGGTCC
CAGTGGCCACAATAAAGACTATATTTTTAACTTAGCTGAGGCATTAAGACGCATCGCACCAGATGCTGAAGATCAACAC
CTTTTTGCTCTAGAGCAGGAATTACTGAGATTGGAGGTAGAGCATCAAAGATCAAGGGATCATTCATTTTCTTGATGCT
GGTTTTATATTAATTTTGGTTCACATGTGTCAATTTCCAAAAAAAAAAAAAAAAATAGGGATAACAGGG
>Contig515 4560 reads, 1945 bases
TTTTTTTGCTTAACAATTCCTTTTATTTTAATAAAGATTGATGTAGTAAATCTGAGGCGTGGSCCTAAAAGTGGGGAGG
GTGTAACACACATTGGCATAGTTCAAAGGCGTGAAAAAAAGTTTAAGTCGTACTGTGGGGATGGCGTAGGAATGCGTTT
TATAATGAAATCTACTAACTTGAAGACATCTATTAATTAAGTATCCGTAACTTAAGGTAGATGTTGTTGGTACTGACGC
TGGTATTGGTACGATGGTATTGGCACGATGGTATTGGCACGATGGTATTGGCACGATGGTATTGGCACGATGGTATTGG
CACGATGGTATTGGTACGATGGTATTGGCACGATGGTATTGGCACGATGGTATTGGCACGATGGTATTGGCACGATGGT
ATTGGTACGATGGTATATAAGTATAAGTCATCTTTTAATAACAACATTACAAGCCCTTGACATCATATATATGAACTCA
TTTTATTTATATTTATTGGCAGAAGTTAAGTGTCTCGTCTGCAAACACAAGGTAAAGGTTATAGTAATTCCACAAATAT
AACTTTTCATACAATGTTCTCGTTGTTACATTAAAGTTTCATTTGCATATATACACACTGTATAACAACTTGAATGATT
TGTTCCAGCTTATTGTCTTACTGAACAAATCTCTTTGAACAGTGATACTACTAAAATACCAAAAGTAAGGCAGAGAGTT
TTTAACAGAGTCAGCAGATACATAATAACTTTAGATGCTAGCTGCTAGTGCGTATGAAACAAAATTTCTTCTAGCTAAA
GAATTTTTGACCACAAAACAAKAATTATGAATAATGGTAGACATTTTAAATACACAAATTAGCAAAGAAAATAAAAGGC
GTTAATTAAAATACGGCTTAATATTAAAAATTAAAAGTAAGCAAAAGTTATTACAAAAACACAACTATGCAGCAGACAT
GACAGTTCATCTTAGAACATAGATTATGTGTGTGCAATTTAAAAAAGTTAGATGAATGATGATGACGTCATAAGGTTTG
CGTGTATCGATTCACCAATCAACCTGTATGTTAGCATATGTCTAATACAGAAATAAATAAAGGCTTTAAATATTACTTT
CTGTAGAAGACTCTATATGATTGTTGTATAGAGTGTCTAGATGTTACACACCATGGTCTGGCAAAACTAACATTGCAAG
AACACAGTATTCGGACAGTGCGTGAAGAATGGGACTGAAATGTTGCATACAGAAGTAGCTGCCCTTTACATAGGACGTT
TATAAAAAAATAAGAAAACACGTTTTAAAGAAGTATTTTTTAAATGTTCTTATATTTTTAGTGTCGTCTTAGTATCCAC
ACTTTCTCAGGGGTCCTCACACCAGGGTCACATGATATAATTGTTTAAATATGAATGAAAGCAACCCCTAATTCGTCTT
CATACTAATGGTGTTAAATTGTCTTATAAAAGCTTTAACTACATTAAGATCTGGCCATAGCCTGACCTCCAGGGGCCTG
AACTTCCTGCGCCTCCTGCACCAGGGCGCACAGAGTGCAGCACCAGATGGACAGGATGTCCGTGATCAGGCTCCCCTCG
ATGTTCCGAGAATCTCGTATTTTCCCGCGGACCATGATCATGGCCACAAAGTTGACCACGGGGACGAATGTGATCAGAC
CACACAGCAGGCACGAGTCACCCACAGCCTCGGCATTCTTGCCGAAGGTGTAGCACGGCACGAAGTAGGTGATGAGGCA
AAGGCCGATGTTGTCGAAGCAGCCGAAAAGACCGTGCTGGAATTGGGTCATGTTGAATGTGTGTTGGCCGAGTCGGAGA
GTTGAGGGGTACTGGAGGGTTGCAGGCTGCTCTGAAGTTGACCAGCAGGTAGGAAGACACTAGGAAACAATGGTTGACT
TTGGTCCGTGCAATGAATACTACCCTGTTATCCCTATCGGAAGAGCGGT
>Contig516 8754 reads, 835 bases
AAAAAAATAGGGATAACAGGGTAATAATAATTATTTTTTCATGAAATAAACCTGACCTGTGTACCTTGCCGCTCTGACA
TATTTTTTGCAGCCTCTAGTAGGAAGACTTTGTTAGCTGAACATTTTCATCAACTTGGAATATTCAATAATCCAGGCCA
AAGATGATGCAGACATTTGTGGCGTTCCTGTGTCTGATAATCTTGTATGATTTCCCTGAAGTTCACACTTCCCTGGCCC
AGTGCCCAGAGGACAATGGTTGTGTCTTCCCGTTCCAACTGACCGCTTCAAGTGTCCAGACACTCTCCAAGTTGGGTGA
CCATAAGGTGTATGAAGAGGCTAAGCGACGCATGTATGAGTTCCAGGAATGTGTTGAGGCTTTGAGTCAAGCTTGTAGA
CATAGCCGCGTATCTGAATATCAAGCTGAAATTGCGAGACATTTCCTTAGCGAAGATGGAAAGGCAGCGATAGCGAAAT
TTTCAAACGATTCCTGCCTCTTAGATAACACAAAACAGAACGAACTGGTGATAAAAGCGCTTGATCTGGAAGAGGTCAT
CAAAGCCGACATGGGGAATCACAACTGTCGACTCGTATCGTCTATGGAAATGTGCATTGAGTCTGCAGGAGACGTCTGC
GGTCAAGACTTCAAAGAATTCATTATAAAATTCTACTCCGGATATTTTGAAGCCATTAAAGCTGAAAAGAGCTGCCAGG
CAAGCTCAGACTCCCATGAAGTCGACTACTGGGCTTAATTGTGACACTGTCCAGGCTGATCAAAGAACGCAATAAAAAA
ATATTGATATGTGCCAAAAAAAAAAAAAAAATAGGGATAACAGGG
>Contig517 120 reads, 192 bases
AAAAAAAAAATAGGGATAACAGGGTAATCAGCTGTGCCCACATTGAGATGATGGTCAGCAGACTTCTGGTGCCCTACAT
CAACCAGGTGAAATCAAGACATTCTAGCTGGACCCAAAGCCAAGCTCTTCAAGGTGGTGTCGCTGCTTACAACTTTGGT
GTTAGTAACGTTCAAACTTGGCCTTCCGTTGTCA
>Contig518 6512 reads, 991 bases
AAAAAATAGGGATAACAGGGTAATAAAATACTGTCAAGTCTTCAGCCAAAAAACTGCACGATCTTATCATCTCGTCAAC
ATGTGGTCTTACCTGGTGACATTCGGACTTGTTTTAGCTTTGGGTCTGGGTATTGAGAAATTTGCCCGACGCAGCGAGG
AAAGTCTGGGGGGAGATGGGTTACTTCGGGGTGACAGAGCTGTATGTGGAACGGAACTGTTTGCTTGTCATGAAAAGTG
TATAGATAAGGCGTTCATCTGTGATACAATCAATGATTGCTCAGGTGGATTCGATGAACAAAACTGCCCAGCTAACTGC
ACTGGTGTAAACATGTACAAATGCGGTAACGGCAAATGTATTCCCCAAAACTACCGATGTGACACACAAAACGACTGTG
GTGATGGCACCGATGAAGCCGGCTGTGGGGGAACATGTGCTCCAGGCTACCAAAAGTGTCAGAGCGGCTATTGTGTAGT
TGACGGGTGGGTTTGTGATGGCCAAGATGACTGCGGAGATGGAAGTGATGAGAGAACATGCGATGGTATGTCTTGTAAC
AACTTTCAATACACATGTACCAACCACAAGTGTATTCCAAAACCCTACAAGTGTGATTTCGAGGACGATTGTGGTGACG
GAAGTGACGAAGTCGGCTGCACGTGTGACAACCTTCACTTCCAGTGCCCCAAGGGAGGCTGCATTCCCGCCGAGTATAA
ATGTGACAGTGAAAACGATTGTGGAGACATGTCCGACGAAGCAGACTGCCCCACCATCCACCCTGGTGTATGTATCGAT
TTGCTAACATACGAAGACTGCCTCCGTATGAATACAACCACATTCCCCATTTGTGGAACTTACGTAGATGCACACAAAT
ACTGCAGAAAATTTTGCGGCATCTGCTCATCATAAGTATTAGAGTCTAATTTTCCAAATAATTTCTAATAAACAATATT
TTTCGGTTTGTTATCTTTCTTGGTTAATTTTGTTTAGTTAATG
[truncated: 19,175,717 more chars]
