# Supplementary material for: Short read Illumina data for the de novo assembly of a non-model snail species transcriptome (Radix balthica, Basommatophora, Pulmonata), and a comparison of assembler performance
Source: BMC Genomics. 2011 Jun 16;12:317. doi: 10.1186/1471-2164-12-317 (PMC3128070; doi:10.1186/1471-2164-12-317)
Supplement: Additional file 11 — Meta-assembly contigs. [file 1471-2164-12-317-S11.ZIP › Additional file 11_Metaassembly_contigs_Radix balthica.fas]

>00001 3 reads, 2113 bases
TGAGAACTCTTGMGCKGACTTGRACCTTATCATTTATCTTTTTTAAGTCCCCAGTCCTGTAAACGTTAGAGACATTTTT
AAAAATGAATTCACCGCCAACTCACTTTTCACATCTAACTTAAGATGAAGCAGCTCGCCCTTGTGTTGCTCGTATCCCT
CGTTGTCAGTTTCTCACACATTGACCACATCAACGGGGACTCGGAGCACGCGCTGAAATTCATCCCCCAGAAGGAATCA
TCAAACAAACATGACACATCAAGTCAAACACTCTTGGCCAATACCTTGGGCGAGGACCCTATGACGTCATACCTGCAAC
GCCAAAAACGCAAGACCGGCGACTGGCAGAGTGTGACCTGTGACATCTGCGTTTTCATCACCCTCCAGGTTCAGGACTG
GATCAGCAAGTCTGCAGACGCGGATTTTATTATAAAGGAGGCAATCAAGATCTGCACGTTCTTTAAGATCGAAGATGCG
CGTGTTTGCTCTATGATAGTTCCGCTACATCAGGAAGAGATCTTGTATGTGGTAGCCAACTTGGCTCTCAACCCCAATG
AAGCTTGTGGGATCATCTTAGGGGACACATGCGGCACGCCCTACTTTCCTGGAGAGATGTGGAATGTCACATTCCCGAC
AACACCTAAACCCATTCCTAAACCTCCTACACCGCCAAAGCCTTCCAGCCCAACACTGAGGTTTCTTCATCTCACAGAC
ATTCATATTGACTTTGACTACAGACAAGGAGCGAGTCCGCAGTGTGGAGAGCCTTTGTGTTGTAGAGTTCATGATTTAT
TTAATGATACATTGAAGGCAGGCAAATATGGAGACAACCACCAATGTGATGCTCCAATGAGTCTTGTAGTTTCCTTGTT
TCAACATCTCAGTACTATCCAAGATCAATTTGACTATGTGATTATGACTGGTGACATCCCTGCCCACGATGTATGGAAC
CAAACACGAACAGACCAAGTCTCTCACTTAGTGGTTCTGGACAAGCTATTTAATGAATATTTGCCAAATAAACCAGTCT
ACTCTTGCATAGGAAACCATGAAAGTTCTCCAGTCAACAGTTATCCTCCACCAACCATACCAATACAAGACATAGGGTG
GCTTTATGGAGCTTTGGCCAATTCCTGGGGCAAATGGCTTCCAGAATCTTCAGTGGAAACTGTTCTCCAATGTGGTGAG
TTCTCATTTTCTCCATACCCAGGCTTAAGAATTATTTCAATCAACAACAACTATTGCAATAAAGGAAACTGGTGGCTTC
TGTTGAACACAACAGATCCCTGCAACGTGCTCCAGTGGCTGATTGAAGAACTGCAAAAGGCTGAAGATAATGGAGAAAA
GGTTCACATGCTGCTACACATACCACCAGGCGAGGGCACCTGCCTGAAGGCATGGAGTTACAACTACTACAATATTGTC
AACAGGTATGAAAACACAATTGTGAACCAGTTCTATGGTCACAGTCACAAAGACTGGTTTCAGATGTTCTATGACAATG
TGAACTTTAAGCGGCCTGTTGGGTTTGGCTTCATAGCTCCAAGTATAACACCTGGGTCAGATATCAACCCAATCTACAG
GATCTACANNNNNNNNNNCAATGGACGGGAACTACTCTGGAAGTTCATATGCTGTTTTGGACTTCAATAACTTCTACTT
CAATTTGACTGAGGCAAACTTATCAGGGAATCCAGTTTGGCAATTTGAATACTCACCAAAGACTCTCTATAACATGACT
GGTTTGTATGCAGTAGATTGGGATAACCTGATTAAAAAAATGGAAGCAAATGATACTCTGTTGCAGCTATTTAATCTGC
ATAAAAACAACCTCTATCCATCCCCTCCATGTACTGGCCAATGCAGAACCGATTTACTGTGTGAGTTGATAGAGGGACG
CTCTTATGACCCAGATTTATGCAAAAAACATATAAATGTATGATATAATTTGCAGAAAGCTGTTCTTTTACTTTAAATG
CATATTATTTTATTACATTGTAATTATAAATTTAGTTATGTGTCACTCGCTTTTTTCCCCCCGAAAATAATTGAATATT
ATTAAACCTTTATTTCAAGTTCAAGTAAAAATGTTTCTATATCGTAACTGAAAAAAAAA
>00002 56 reads, 2188 bases
CAGTTGSAACCTKGAMCTTGWCAGTAAACTGACTGATCCTCAACATAAATTTAAGTATGACCTGACTTGTTCTTTCATC
AAAGTTACAGTTTAATTTTTTTTTGTTTAAAAAAATTTTAAGGTATGTGTAATGCAAAGTATATAAATTATAAAGCTGT
CATTTTTGTGGCTCATCCAAATTAACAAATGGAATTGTAAAAATGAAGAATAAACTAAGATTCTTATTTTTTTTTTACC
ATGGTTTAATAAAAAAGTAAATAAGTATCACACAATCTAAAAAAAAATTTGTCAAATGTTCATGAAGAATGAGATTTCA
ACACTTAGGATGTGGGTAACTTCACAATGCATAACTAAAAATGTGAAGACTGGWWAGACTGATAACAGATTAATACTCT
CGCATTCACATGTAAGAAGCCACATACAATCATAATTTAATCAAGTGCATATTTTACATAAACTGATCACTTGGAGCAC
GAATATCATCTATTTTAAGGATCATGCGCACAAGCTGAGCAGCAAGCAGGATTTGTTGTTTCTTGGCAGTCAGTGTTTC
GATGACATGTTGCTCTTTCATATCATTAGTACCCTTGTTCAAGCAGTCAATTCCTAAAAATGAATTCTTTTCTTTAACC
TGCCTAGACTTGACTTCAGCTAGAGTTTGAAATGGAGACAGACCGCTGTTTTCTGCTAATGCCAATGGTATGCTTTCCA
ATGCCTCAGCAAAGGCCCTAACTGCATACTGCTCCAAAGTCGAGATCTTGTCAGCAGCCTCTTGAATGGCTAGTGAAGC
TGCTATTTCAGGAGCACCCCCACCATACACGATTCTATTGTCACGAACAATGTTACGAATAACACACAGGGCATCATGG
ATACTACGTTTGGCTTCTTCAACAATCATTTTATTACCACCACGAATAAAAATTGTGACAGCACGCGAGTTGTGGCATT
CCTCAATAACCAACATACGATCTTTAGTGGTACCAAATGTAAGCTCTCTCACAATCCCAGCCTTACCAAGCTTCTCAGC
AGTGAGTTCCTCAAATCTAGGAACAATTCTCCCTCCTGTAGCTATGGCAATAAGCTCGATCTCTGGTCCTCCCACCCAT
CTGACAGCAGGGAGTCCCCTTTGCAGAAGAAGATGATTTGCTTCATCATCAAAGCCCCACTGACAAATAACTAAATTTG
CACCAGTGTCTTTCACCTGTTGGACCATGGATTCAAACTTTTCCTTTTCATATTCTCTGAGTTTGTGATAGTCTTCAAC
ACTTGTGACATCTAGCTTGTGTTTGGTCTTGGGCTTTGGTGGTTCAAATGGGCAAGTAAGAATTGCAATGCGAGCATCT
TTCACTACCTTGGGCATCTGTGGGTGGCTCATGTCCTTATCAACAACAACTCCCTTGACCAGCATGGTGTCTTCTAGTT
TGCCTCCAACTTTGCCTTCTACTTTGATCAGCTCAAAGTCAACATCTTTACGCTCTAAGTCAGCTACTGACAGAATAGC
ATCAACAGCTATTTCTGCCATTTGACGGTGGCATCTGTTGACTATTTTAGAGCCTAGAGTTGTCATAGCTAGTCGAATC
AATGGTTCTTTGTCTGTAAGATCAATTTTAAATGTCTCACTAATTTGGTCAAGCTTGTCAGTTGCTATTTTTGAAGCCA
TTTCATAACCATCAGAAATTCGAATGGGATGAATTCCTTTATCCAATAGCTTGTCAGCCTGTTCCAGCAAAGCTCCTGC
CAAAACAACAACACCAGTTGTACCATCCCCTATTTCATCATCTTGGGACTTTGATAGCTGGACCATTAATTTGGCAATC
TGATGATCAACATCCATCAAGTCTAAAATGGTTGCTCCATCATTTGTTACTGTAACATCTCCATCAGGTCCAACCATCA
TCTTATCCAACCCTTTAGGACCCAAAGATGTTTTGATGATATTGGCCACAGACTTGGCAGCAAGAATGTGAGACTTGTG
GGCATCTTTTCCCGTTAATCGTGATTGCTTTTCTTGATCGCGTAAAATAATAAAAGGCCTTCCATACTCATCGAACGCT
ATCTGCCCTGGAAATTGGTTCATTATAAATTTAAGCTCTCAAATTTGGATGTTCATTGATTTTGAGAGAATCCTGAGGA
ATTAGAAAAGCCGGTAGAATATTTACACTTATGGCGGAAATAGCGATGGGCGAAT
>00003 3 reads, 1752 bases
TTAAGAAAACTCTTTTATCTTTCTCACTTTCCTTTGATTGAAGTTAAAAATGAGCCCTCACCTATTGTAGAAGTTGGAA
AAACGGTTTCTCCTCCTAAAGAAATGAGCCAAAAACTTGCCTTAACATCACTTCCTAGCGAATGCCCAATGAGTCATGG
TAATAATCTTAATCTGCCAAGTGAGTGTCCCATGAGTCGACAGGAGCCAAGTGGCTTATTGACTTTAGAAGGATTCAAC
AAAGATAACATGATGCCTCCACCTAATCAGCGACCAGCACCCGATCAACCATTCCCGTTGCCAACCGAGAGAGTCGTCT
CTTCCATCCCTAAATCAGGAACAGATGAAAACTGGGTTTATCCTTCCCCTCAAATGTTTTGGAATGCCATGCTGAGAAA
AGGCTGGCGTTGGAAAGATGATGAAGTCTCTCAAAAAGATATGGAAAATATTATAAATATTCACAATGCAAACAATGAG
CTTGCTTGGAGAGAAGTACTGAAATGGGAAGCTCTTCATGCAGATGAATGTAGAGAGCCTAAACTGAAAAGATTTGCTG
GGTTTGCTACAAAATACTCTCCGAGAGCAAGACTCCGATCATGGATGGGGTATGAACTTCCATTTGATCGCCATGACTG
GGTAGTTGATCGCAATGGTAAAGAAGTACGCTATGTTATAGACTATTATGATGGAGGAAAGTTAAGCAGAAATTATGAA
TTCGCACTGCTGGATGTGCGGCCTGCATTAGACTCATTTGAGGCCTTCAAGGATCGTATGAAAGTAGCAATATGGAGAT
GGACAGCAAGGAATGATCCAGATCTCCAGCAGTCTGGTGATACTCCAGATAACAGCCAATCTGGAGACCCACTCAACTT
CAGGAACATTTCTGAGGGTACCAAGGAGAAAGAGCAGAAGCCCTCTCGCATTTATGTCACGCAGTCTGAGCGATGTCGA
AAATGGCCAAGACAAGAAGAATTCAGTCAGCTGAGATGTGTGGGATAATTAGAGAGGATAGGAACCGATACCTGAAATA
GAGCAATTCTTGCCACTTGCACGCCTTCAAATTAAGCTTAATTAAAAATTAAACTTTCAAAATTATTTTAAGGTGATAG
GTTCCAACTGTAATATAAAGTATTGACCAAGATGGGTATGTWSWACTGTTATAAAACTAATACATGCTTAATATTATTC
AATAGCAGGTTTTCATTGACTAATTACTAGCTTGTTGTTTAATTGTCCCAAGCATTCTTAAACAATAATACAAGATTAT
TATACATGAAGATCACAGAGGCAGGAACTAATACAAGGAGGGGAGATAAGTCAAACCTGCACTCACTGACCCTAAACTC
TTGACAGCTCCATCTAGTTATACACAGACGTTGGCAGTCTGTCCCAAGTTAAACTCTATAATTACATTAACTTACATCT
ACACCCACCCACCTTCACCCCTATCCTTTACTTGCTACTTAAGATGTKTTTTTATGACCACACTTATCCCATAAACCAT
GATCTTATCTCAACCACCCCCAGAGCTCCATAACTACTCCCAAAAACCTTTAAATTCTTTCTGACTGTATAGAATAGCA
GTGATACATTCTTAATATAATGTCATTTCAGGTACTCTTTGTATCTGTTCAAATGATAGGCTTTTCATTTCAGTTCTAT
TTATTTATTGAGCTTCAAGTCTGTTCCCTTTATACTGATTGATTGGCTTTGAATGCACACATCCATGTTTGCAGTAACA
TCTGAAATGAAATA
>00004 5 reads, 2087 bases
GCTGCGAGAAGGCTAGAAAGGATAAGACAACCACAAACATTCTTGATATCTTTCTCTCCCTTTCTTCCCAAATATCCAA
TTTAAAAAATGATGTTAAAAGATGTCAAAATGCTAATATGTATCATGAACATATTATGAATMYGTATYGGGTTCATTCA
TAAAAGTGTGTAAAAAATTGTTTGTATCAAAATACATTTTTACACTCAGACCATTCCAATCAGGCTGGTAGGCAACATA
CAAGTTGACTGAAGCAGTTAGGGTGAGATAATAGGTGCATAATATTTTTTTTTTATTGCAACAAATGCCAATACAGTAG
TTCATAAGCTATTGATTTTTAATAGTTCTTGTGGAGGGCGGCTAATCAAAGAAACGATGTTACAATATGTTGATGTTTC
ATTGATTCAGATGATGGTCTGTACTATACAGATGTGTACATTGGCAAGTTTCTTGATAGCATTTATTTTTTATCTTATA
GTGATGTGATGTTAAGAGCAATAATGATAATGTGAAAGCACTCATAGGTTGGACATTACTGGACAGCCTCTGTACTGCT
GGGATGTCTAGAACCGCATTACCCTTTTTAGTTCATTATTAATGGTATTTCAAATACAATTACAATTTTGAAGTGTTAT
CTCTGGTATGATCACATTGCAGAAAATGTTTTTCTGAATTATTTTCTTCCATGAAGCTTTCTTCAAGAAAAATCCAAGA
TGCACTTTTGAAACCAATCATGGTAGAATTCCAGAAATTATACAATATAGGTTCACCACTGATAAGTTACTAGTGCCAT
ATGTAAGTATGTATATGGTGACAGCACTGGGTAACCATTTATAATTGACTGTAAAATTGAAGAAAATTGGCCCTTGGAT
TTTCCAGGATAGTATCCTTGTAGAAAGGCCTGTTTTGAAATATAGAAGTTGGCTTCGAAATGATTTCACCCAGGGATTC
TTCATTTAAAGGGCATGCAGTCTGGCACCTCTCCTTYTRTTKTTACTGCTGAAGCATTTCTTCTCTGGGAAGAAGATGA
GGCCAGAATGATGCTCAATCTGGCACAGTGGGGTCAGGAAGTCCTCGAGTTTTACCTCTTCTCCTTCTTCTGGGGTAGC
ATTAGGCATCATGTATGACTCCAATTCAAGTTGACCATCATGAGTTTCAATGACAATGACCTTAAAGAAGTGAGTAGGT
ACAGAAACTTCACCATCACCCAGTACATCAAACTGCTTGACAGTCTTGTCATCATCCACGATAGGCAGGAATAATGGAC
CTGAGCAAACATACACCCCCTTGTTTTCACGCACCAATTTCTCACGAACGTAGCACTCCAGATCAAACCATGGTCCACA
GTTGAACCCTGGTACCTGTGGGACAATGTTGGTCATTGTGAAACATTCACAGAAAGATTCGGGATCATATGGGTAATTC
TCCGGCTGTGCCATTAGGCCCATCTCATACTCCGTGTCACAATAATCTTTGGCATCTGCCCGATGGTATCCATGAATGC
GACAATCAGGGGTGAACTTTGGCCTCTCTTTATCTTCATTGCTTGCACATTGTGTTCTCTCGACTTTGACTCTCCTGTC
ACAAGGATCATCCTTGAAAAGTTTATCATACTGAAGGTGTTCGTAAACCCAGTTGGGGATTCTGTTCTTTGAGTCATAG
GAAACAATAAAGTCCTTGAACCTCAAGGGTTTGCAGCAGGCAGTAGGCTGAGGAAAGCCGACTCTTTTCTTGATAACAT
CGCCAACGTAACAAGGTTCTTTGTTGTCAGCAGCATGCAAAGTCAGGGGACTGAGCAGATCGTGTTTCTTGAAAACCGT
GCTTAGACCGCATGCAACGGACGTAGCGGCAAGACTTGTGAAGCTAAACATATTTGAAATTTCCGAGATGTAACACAAA
TAACGAGAAAATACTGACCTAACTGTCCAACAGATGAGCTACTGTGAGATTAAAAGCTGCCTGTTCAGCAACCAAAAAA
AATGGTGGTCGCCCAACACCGCTGCTTACCGTTGCGAGATAGTTTGGAGATGCTGGTCTACGAGTGTGATGTCATATTT
TGACTTCGGTGATCGGACGAGAACCGGTATTTT
>00005 24 reads, 1701 bases
ATGTTCACTTTCTTGTTCAACSSWTAYGYATTCCTGGAAAAATTTCAACTCAAATCTGATGAAATCAAAATTTTAAGAG
GCACTAGAGATGGAGCTTTGCATGCTGAGTTTTTCAAAGCTTTGTCCAGAGTGAAACAGATTCACAGTGATTGTAAATT
TCTCCTGCGAACCAACCACCAAACTGCAGGTTTGGAGATCATGGAGTCTATGGCTCTCCATCAGGAATCTGCTTATGAG
AGATTGTACAGGTGGACTCAAAATCAGTGTCGCCAGGTTACACAAGACACACCTGATGTTAGTCTCTTGCTGTGCCAGG
CGATGGAGGCCTTGCAGGATAGACCTGTTCTTCTTAAATATTCATTAGATGAATTTGGGAAGGCCAGGAGGAGTGCTGT
TGTGCGTGGTTTCATTGATGCTTTGACAAGGGGAGGACCAGGTGGCACACCACGGCCTATAGAACTTCATTCTCATGAC
CCACTCCGATATGTTGGTGACATGCTGGCCTGGTTACATCAGGCCTCTGCTTCAGAGAAAGAATATTTGCAGTCCTTGC
TAAAAAATTGTACAGCCAGCAATGTCCAGATGGATGACGTGTTGGGAAACATCACTGAAGGAGTCTGCACACCATTCAA
GGTTAGAGTTGAACAGGTGTTAGTGTCTGAACAGGACCCAGTGACCTTGTACAAGCTGGACAACCTCCTTAAGTTCTAC
CATCACACCATCGGCCAAATTATAAGTAGTGAAGCCGCCTTGTTGACAGTTGTGTCTGAAATACAGGACCTCAGCCATC
GAATGTTTTTCAACAGCCTTACAAGTCATGCTAACAAGTTGCTGGACAAGGTTGAACTTCCACCCCCTGACCTGGGACC
CACATCATCATTGACCCAATCACTGCAATTATTGCGAGATGTTCTTGCCTGCCATGATGCATCAGTTGTGCCTATTGAT
GATAAAAAACAAGATTATAAACAGATCCTGGCTTGTGTGATTGACCCCCTCCTACAGATGTGCTCCATGTCAGCCAGTA
GACTGACCACAGTGGACATGGCAGCCTACATGGTCAACTGCATTCATTTGATCAACACCACTCTGTCCTTGTATGAGTT
CACTGACACCAGGCTGGAGATGTTGTATGCTCAGACTGACGCTCACTTGGATACCTTGGTCAGTGAGCAAGCTTCTTAT
GTTTTAAACCGTGTAGGCCTTGCCCAAATGTATGGATTTATTCAACAGCATAGACCTGACCAGGGCCCACTTTCCTCAT
TATCTGGCTTGGATGAACTGGCAATCAAAGCTGCAATGAATAAATTTGACAGCTTCTTGGCTCAGCCAGACAGTTTACT
CCTCCCCCAGTGTAGCCTCATTCTCAGCTCAAGTGTCAGGGAGTCTGCCAAAAAGAGATCAGTGGAGTTGGTTTGCCAA
GCATACAAACAAATCTACACATCAATCTTAGACCCAATGAATGGATATAAAGATAGCTTGAATATTGTACCTAGGACAC
CAGAACAAGTGGTGCACTTACTGATGTGATCATGTTGAATAATTTATTTATTTTTGTGCATAAAATTTCAGAAGGAATG
TTACTGTTAATTTACTTTTTAATAGCAAGCCATATCTATTTATAAGCTGTAATAAATAATTTTGGTTTCAGAATATTTA
TTGTCTTTGCGAGGGATGTATTATATTAACATGTTGCTTTAA
>00006 3 reads, 1378 bases
TTTCGACATTGTGTGCTACCATTGCCGCAGGCGTCCATGTCAGAAACTTCCTATTGGATTAATTTCTTTACAACTGCTG
GAATTCCTGCTGGAGATGCTGCCCACTATGCTGTTATGTTCTCTGATAATCGCATCACACGTGAAATGCTTCTTGATCT
CAGCAAAGAATATCTTACAGACATGGGTATTACCAGATTAGGTGACATCATAGCTATCCTGAAACATGCTAAAGATGTT
TTTAAGCAGGAAGCAAAAGATAAAATATTAAAATCAACTTCCTTGACATCACTTTCATCAGCAAGCTCCCAGTTATCTT
CACCGGCCTTGCGCAGATCAACAGGAGGAATCTCTGGGTTGATGTTGCACCCTTCAGTGAAGGTTGAAGAAGAATCTCA
TGCCAGAAGTTTGAAGAAACTGTCTGCAAGTCGTATGGTCAATCATTTTACAAGTAAGCATCCTGAGGCAGCACCAATG
AGCCAGTCTCCTGTTCCTAAACTACCACCCCCAGAGCTTCCAAGGTCTAAAAGGAAAGTCTCAGTCTTTGATAGATTGG
GTGAAGATGGTGTTGATGATACAGTTACATTAACTACAAGCTCAAAGCAGTCAGCATTACAAGGTTCTACAGCTCAATC
TTCTGTATTCAGCCGCTTGGGTGGCAAAGCAGGACTAAAGAGATCTGCAAGTGAATCAGTATCTCTGGAAAATCTAGAT
GATTTGTTAGGTGCAAGTGAAGAAAGTTTGCCCTATGCTGGTGTCTTAAAAAGTACTGGCCCAACACCTGTAAAGAAGG
CTAACATTAAAGTTGCTATTAACAGATCTAGTCTAAAAGAACCATTCAAGATTAAGAAAACATTTAAATCAGTAACTGT
AACAGAGGAAAAGAAAACATCACATATACAAAGACCAGAAGTGTCAACCACAACAGAAGGTGTGCTCTCAGATTTTGCT
AAACGGGAATCTCCTTCAGTAAAAGAAAGACTTGGATCTAAAGCTCAGCAATTTTCTGTAACTAGCACTTCTACACCCA
AAGTAGCAGTAGCACAGAAACAAAAGAGTAAATTGACAGTTCAAGACCGCTTGGGAGCTAAGGTAGATGAACAGCAATC
ATCTCCAGTAGTTTCCTCAACACAGCGCATTACAGCCAAGCCAAAAAAGAAAGATACGTCTAAGTCCAACACAGCAACT
ACTGCACAAAATCCTAGTGGAGTGTTCAGCCGACTTGGCAAGAAAGCTCCATCATAAAGATTTAAGTGATAGATCTTAT
GTGTTAAATAATTATAGCTTTAAAAACAAATATTTGTAGATACATTTATGAAAATAGACATTTAGCCCCTGTAACAATT
TGAAGATTTAAATTAAAAGTCCTTTTCAATTAAAA
>00007 7 reads, 1574 bases
TGCTGCGAGAAGGCTAGAGCAAAAGTGTTAATGGCTGAACTTCCTCTAAGAACAAGATGAAAACATTACACTAAAATTA
ATAAGGAATGCAAGAAAACATCAATATATTTAATTCGCAAACACCTAATAATGGAGCAAGAGGAATTTGTTCATGGCTC
GATGCTTTGCCATGATGAAATTCCCCTTAATCCACCGGAAAATGTTAATCCCATGGACTTTTTTGACGATGTTGATGAT
GGCGATCTCATCATTCACAGAGTTGAGTCTGATCAAGTTGTTTATCAACCACAACGCCATAAAGTTAAACTTATTGGAA
AATATTTAATGGGTGAAATGTTAGGAGAAGGTTCTTATGGAAAAGTTAAAGAAATTCTTGATACAGAAACATTATGTAG
AAGAGCAGTGAAAATTCTTAAAAGAAGAAAATTACGAAAAATACCCAATGGAGAGCAGAATGTTCAGAGGGAAATACAG
TTGCTGAAGCGACTACGACATAAAAATGTCATTAGATTGATAGATGTGATGTACAATGATGAAAAACAAAAAATGTATA
TAGTCATGGAATACTGTGCCAGTGAGCTACAAGAAATGCTTGAAAGTGTCCCTGATAAAAAATTCCCCATTTGGCAAGC
TCATGGGTATTTCTGCCAGTTAATTGATGGGTTAGAGTATCTACACAGTCATGGGATCATACACAAAGATATCAAGCCA
GGAAATTTATTAGTGACCAATGATGAAACACTTAAAATTACAGATCTTGGTGTAGCTGAGGCTTTGGACATGTTTGCAA
GAACAGACGAATGTCGCACGAGCCAAGGCTCTCCAGCATTTCAGCCCCCAGAGATTGCAAACGGGTTAAATACCTTTTC
AGGATTTAAAGTGGATGTTTGGTCCAGTGGAGTAACCCTGTATAATATAACAACAGGGAAGTATCCATTTGAAGGTGAC
AACATTTATAAACTTTTTGAGAACATTGGTAAAGGTGTATATACCATACCTGATGAGGTGTCTGACCTGCTTGGTGACC
TGCTCAGGGGAATGCTAGCTTATGATTCAGAAGTAAGGTACACATTGCAGCAAATTAGGCAGCATCCGTGGTTCATCAA
ACAACATCCTAGAGTCTTAGAGCGTGTATTGATTCCACCTCGTCTAGATGATCCAGATGATGTTTTACGTTCTATGACA
GTAATTGGGAGCCTTAATGCTATGCATTATGGGGATGATGATGGTGAACAGGATGGTGATGTGCCCATGATTTCGGATT
CTCACAATCCAAGTTATATTCAGGAAGATGGATGTGCGTAATAATGTGATGGATCATGTTGTTCCCTCTGCACGCCAGA
CATCTGATGTTATTGAAGAGGGAGACAATGAATCTCTTCAAGCAACAGCTGCAGCAGCTCAGAGGAATGGCAAGACCAA
CAACATGAGACTTGATGAAGCCTCTTGTTCCCAATCACCTACGGAGATGAAATTACACGTTCAGCTAGATATATCAATT
ACATTGTAACACCATTCCATTTTAGGTCTAACCCAGATTATGTTTTCTGAACTGTCATCTTTTTKATCGGAAG
>00008 10 reads, 1974 bases
TTTTTTTTGTACAAATCTACACAGATATTAGGGACTGTAGATTCTCTTATTGAAATATTATTTTTGAGACGCTACATTG
GATTTTTTATGAAACTTTTTAAGTTTCTGTCTGTGGAAAGGTTTGCCCTAAGGCAGGCAGTTTAGAATGAAGCTTGTCC
TAAAAAAAAGATTACTTTAAATCGTAACTCCTGGTATTGATATGGTTGATTACCATCATTAGTGTTCCAGTCTTCACTT
AAAAGAAAATGGGGATATCAATTACTTTTAATTGTCCCGACGGTTATTGCATTAGAAAGGTTCCTATACCGTTAAATTT
GCACGTCATTTCTTAGCGATGATTTTATTCTCCCATGTACTGTCGTATTGCGTATCCAATCTTCTGTCTCTCGTAATGG
ATGATTAAATGATTCAACTATTTCGTCACACTTGATGTCACCTCCAAAGCCTGTATTAACGACGTCCATCTACATTAAG
GGCCGGTATTACTTCCACCACTGAGTGGGTTCACAAAGCTGCACTCTGTTTTTCTTTGAACATTATAACCGCCAACCGC
CTCAGAATACGACGGTGGACCCACAAACACAGGTGTCATGTACGCAACCCTGGCGCGGACATCTCTTGAGCGCTGGACC
CTGGCATTTCTGTTCACATTCCTCCTGACCACGGCCGCTATAATAGCCACGGTCACGAAAAAAATTATGACCGCACAGA
AGACAGTCAAGGACACATATAAACCCAAGTTATCGTCAAACAAGCCGTCATCATCATCATCATCTAAGATGACAGGGTT
CTTCTTTGTGCAGTAGAGCTCGTCCGAGAAGTCATCGCAATCATCGACGTTGTCGCAGACCGAAGACTTTGAAATGCAG
TTGCCATTGGTGCACGTGAATTCATGGCACACTGGTTTGACGTAACACGTGCTGTAAAGTTCATCTGCCCCATTCGAAC
AGTCGGAGCTGCCATCGCATTTGTACATTTTCTTGATGCACGTACCATCACCGCAATGGAACTGGTCATCTTCAAAACC
AGCTCCACATTTTCTGGGCCGGTTAGGTGTACACTCACTCAACATTTCGTCCGAGTAGTCACCGCAGTCATTGACACCG
TCACAAGTTCTGTCCATCGGGAGGCACGTGCTGTTAGTGCAAACGAAACTTGAGCAGTCGCAAACCGGATCCCCAAAAA
TATCAGTTTTCATCTCATCGCTTCCGTCTTTACAGTCGACGAAGCTGTCGCATCTGTCCGTAGCTGGGCGGCAGTTGGT
GTCGTTGTCACACAGAAACTCCGAGGGTCGACTGCATAATCGGTCGAGGTGATTTTTGACGGGAGTTACACTTCCCCAA
CATTCGGCACCAGCGTAGGGAACTTGCTGAATGTCAATGCATTTTCCCGTCGGACACGAAAACTGTGAACAGCTGCAGT
TGGTTCCCGGCCACGTCAATTCGTCACTTCCGTCCCAACAGTCACGTTTGTTGTTGCACACCGATGAAAAGTGGATGTG
GAAAATACCGTCGGCACATTGGAATCTGCACTTTTTTTCGTCCTGACCATTCGCACAGTTCTTGACACCGTCACACAGC
TGAGATACATGAATGCATTTGGTGCTGTTGTCACATGATATATAAAACAGTGGGCATGAGTCAGCGTCAACCAATAACT
GGCAGATAGTTGGAGTTTCATCAGAACCATCTGGACAGTCTGTGCGTCCGTTACATACGTCACTGACATTGATCGCCGT
GTTGTCTTGACAGACATAGACGACACTAGAAGTAGGGGGCGTTGGGGTGGTGGTGTTATACCATTCTTCGGTTTGATTA
AATTTAATTTCGGTGTTGCTAGTGGTCAAGTTAGCGTGCTCAGGCGCACTGGTTTCTTCAAAGCGCTTTGTTGTAAATG
GAGCTCGACTAGTGGTTCCTTCAGGATATCCAGTTGTATATGAAGCTCGACCAATGGTTCCAACATGATTTCCAGTTG
>00009 4 reads, 1558 bases
TGTCCTAGTAAATTTCTAACCGGTAATGTCCTGATGCCCAGGTTTTTTACCAAAGCGATGAAGCAATTAGAAAACCAAG
ATGCCAAATATCTCATTCTTGTTGCCACATCTGGAGACACTGGCAGTGCCACTTTGGATGGATTTAGTAGACATGCAGG
TGATGCTGAAGTAGGAGTCATTGTTCTTTATCCCACAAACAATATAAGTAAGATTCAGAAATGGCAAACGACTGCAATG
GAAGGAAATAACATTAAAGTTATTGGTGTAGACAGCGACTTTGATTTCTGTCAACAAACAGTCAAAAAGATTTTCCGTG
ATGCAGATGTAATAAAATCTTTAGGATTTTGTAAGCTCAGTGCTGCTAATTCTATCAACTGGGGGAGACTACTACCACA
GACTCTGTATCATGCCTCAGCATACGCCAACATGGTCAGAGATGGTCATATTAACCTTGGGGACCAAGTAGACTACTGT
GTACCTACTGGCAACTTTGGAAACATTCTTAGTGCCTATTATGCCAAGGAAATGGGTTTCCCCATCAGGAAACTGATTT
GTGCATCAAATACAAACAACATTCTCACAGACTTCATACTTTCAGGAATTTACAGGCCATCTGCATTCACTCTCCAGAG
AACCATCTCCCCATCTATTGACATCATTGAGTCGTCCAATATGGAGAGGTTATTGTTCCATTTGTCTGGTGAAGACCCT
CATTTTGTCAAAGATTTCTACACAGAGGCAGTCAGCAAGGGACAAGCCACAGTTTCACAAAAGGTAAAACAAGCTTTAC
AAGAGATGTTTGTTGCAGGTTATGCCACAGAGACCAACACAAAAGAATCTTTGGTAAACGTGTTCAGGACAACAGGCTA
TCTGATGGACCCACATACATCTGTAGCTCAATTTGTGGCAACCAAATGTGGTGATGTGAACTTCCCTACTCTCATATGT
GGCACAGCACATCATGGAAAATTTATTGATAATATCTTACCATTGCTGGACACTAATGAAAACGTCTCAAGTCTAAGAG
TTGACGAACTGATACAGCGAGCAGCTGAGGTGACCAGCCGACCCAAGATGAACAGATTCTTGCAATCTATGCTCACCAA
AAAGATTCAACACAAAGACACAGTTTCAGAAGATTATGGTGAAATTTGTACCAAGGTTGTGGAGTTTTCAAACACATTG
TGATTGTTGTGTGTGAAGTGAAACAAGAAAGTTAATTGCTGTAGTTACATGATATAGTCGGGTGGGACTGCAATCAGAC
GAGTTTGATGTCTACTTGGACAACACACAACTTTATTTACTTACATCTTTGTTTATGTTTGTTTTGCTGAGGAAGGCTA
TTTGCTGAAACATACTTTGTTTTGTTGTGTCTTTTTCAGGCTGACCAATAACTTATTCAATAACCTTTTTAAAAAAAAA
TATGATTGCAACATGATGATGTGGCAAATATAATAAATGTCACTGACAATCTGAAAAAAAAAAAAAAAAAATAGGGATA
ACAGGGTGGGGAAGCTCTGATGGTTCTNTATCGATCATTTCTAGTACAGGTGATGGG
>00010 29 reads, 1403 bases
ATTTTTTAAGCCCGATCCTTAAAAACAATTTTTTTTTACTAATAAAGAAGTTAAATATTTGTCTCTGACTTAGATATGA
TATAAACTTGAATCTATCCCAGCCTTTGTTTACAAGTATTACTTGAAACTGATGCTTTGAAAAATATACATAAAAATCA
TTATAATAAAAAGGGTCGACAAAATAAATGAAGAACGTTCCATTGATGACTACCTTTAAGTAACGTTGATGTGCTACAA
CAGGAAGAGATCTTCTCCAATCCTGACAGATGATCAGCTGTATCAATTAAATGTGCAGCCGGTGTGCTGAAGGATTATG
TTGGCCACTCTGTGACCTTCCTTGACACAATCTTCAATGGAGTGGCCAGTGATCAGCTTGGCCAGAAATCCTCCTACAA
ATGCATCTCCGGCTCCATTTGTGTCTACAATATCATCTTGACTGATTGGAAACACATTATATGATGTTATCTTTCCTTC
AGAATAAACAATAGTTGTTTCACTCCCCTGGGTAAGAATGACTGTTCTTTTTCTATTTGTGTTTACCTTCTCCCAGTTG
GCAATCTTCTCTGCAATTTCTTTTATGTCGGTTGTTCCAAGATCATTTGCCTTTGAAAATTCTGCAGCTTCAGATTCAT
TACCAAACCAAAAGTCCACATAAGGCAACAATTTTAACATGGGATCTTTAAAAAATGTACACAAGAAAGGTGCTGACAT
GTTCATTGAGACAATTTTATTGTTGTCTGCCGCAAATTTGGCAATCCTCAACATGGCTGATGGACACACTGTCAAAGGA
TAACCAGCAAAATAAATATACTGTGCTTTTTCAACAGCTTCCCAATTCTCTGCAATATCAAGATGGTCTTCAGTAAAAT
GGTTAGCTGCTGCCAAATTGGCAACCAGGGATCTTTGTTTGCCAGTACATATAACAGCACATGTACCAGTGGGCTCACT
CTTTGTGTATTGAAATTTCCCTACTACACCTGCATCCTTTGCAGCAGACGCCAAAGTTTTTCCAAATTTGTCATGCCCT
ATGCAGCCTATGAAAGATGTTGCTTCTGGTACTTGGAGCAACCACTGTGCTACTCGTATGGTATTTAGTGTTGCTCCCC
CAGGAACATACTCTACATCTTTGAAGTCTTGAATCATTTCCTCATACATTGGCTTGTGTTTGTCTTCAGCAAGAATTGC
ATTATCAGCTTTCAGGTCATACTTTTCCAAAAATGCAGTTGTACCCTGCACTGAAATGTCCAAAAGTGGGTTTCCATAG
CCCAACAATATCCCTTGTTTAGCCATATCTTGCTTTATTCAATGCTATTAGTTTAATTTCAAACTGACTAGCTTTTATT
AATACGCCTCCCGTTATTATTTGGTACAATGTTTATTCTAGTAAAGAGATTACCCTGTTA
>00011 4 reads, 1529 bases
ACGACGTGATCGGYARTGKCACCGGTAGGAAGGGCATTGGTGTCAAAGACTCTGATACATTTCAAAATGTCGAACACAT
TAGCATCAGCTTTCCGAAACAATGCTTTCGCCAATCCATTCTTTACCAATGCAAAGTGCGAAAGCAGTGTTAACCCTAC
AAGAACAATCGCCGCTGCTGCTGGAGCAGATTCAGAAATTAGCTGTGAGTTTGGCTCAGGAAAATACTATGCACTGTGT
GGATTTGGAGGTCTGTTGAGTTGTGGAATTACACACACAGCTGTGGTTCCTCTTGATATGGTCAAATGTAGAATCCAAG
TTAACCCTGGTAAGTATGGAGGAATAGTCAAGGGCTTTAAAGTGACGATTGCAGAAGAAGGAACCAGAGCACTTGCCAA
AGGATGGGCCCCAACCTTTTTTGGTTATTCAATGCAAGGAGTCTGCAAATTTGGATTCTATGAGGCCTTTAAAATCCTG
TACACTGAACTCTTGGGAGAGGAAAATTCCTATCTTTGGCGTACAAGTGTGTATCTGGCAGCCAGTGCATCCGCAGAGT
TCTTTGCAGATATTGCCCTTTGCCCAATGGAGGCAGTGAAAGTACGTATTCAAACTCAGCCAGGATGGAGCACTACACT
CAGGGAAGGTTTCCCAAGGATCATGAAAGATGAAGGAATTTCTGGGTTTTACAAAGGTCTTGTACCTCTCTGGGCTCGT
CAAATCCCTTACACCATGATGAAGTTTGCATGCTTTGAACGCACAGTTGAGGCTCTGTACAAGTTTGTTGTACCCAAAC
CACGTTCTGAATGCACCAAGGGAGAACAACTAGTTGTCACTTTCTCTGCTGGTTACATTGCTGGTGTCTTCTGTGCTAT
TGTGTCTCATCCTGCTGACACCATTGTATCAAAGCTCAACCAGGCGAAAGGTAGCAACTTCATAGACGTTGCCAAATCT
CTTGGACTTCTAGGTATGTGGAAGGGTCTCTTCCCAAGGATTATTATGATTGGTACACTCACAGCTCTGCAGTGGTTCA
TTTATGATTCAGTCAAAGTGGCTTTCAAACTACCCAGACCACCCCCACCAGAGATGCCAGAATCACTTAAACGCAAACT
TGGAGTTAATTGATTAAGTATTAGATAGTTAAGAGGTAAAAAAATTCTTGATTTTAGAGAGATGACTTTCCACCATTTG
AATTTAACAGGTAAATTAAAAAATTGAATAAGAGCAGACAAGCCTTGAAAGGTTGACTTTGGAATGGGAGAATGCTGCG
AACGTTGTAGGTCTAAGTGCTGGGAATATTAAAATTTTGTCTCCACCTAGAATGCTGTGCAAGAGGCATTATTGGTCTG
TTTAATTGAAATAGTAAAAGTTGATTGACACTAAGTAGATACCTGGAGTATTTGAAGAGAGTTTACTTACTGATGACTT
ATGACCTGTTTTAAAACATTTTGTAAATGAGGGAACAGTTTTGTTCTGGAGATGAATTTAAATATTAACTACAGAAACA
TGATTATAACACATAGATTATAGTAATA
>00012 50 reads, 1812 bases
CGTGTCGCAATGTAACRKTGCTCGRGTCATAVGGCGTAGGGCGTTGTTAAGACGTAGTGACTTGCCTTACAGCTGCAGT
GTTACTAGCTCATTAAGTGAATCTGCTGTGAAAGTTCTTCGTTAAAACAGTGACGCGTGCGTGATTATCTCCTCATTGA
ATATCGCACCGTTTAGACAATAAAATAACATCATGGATGGATTAAACATAAAGAAGAGCAGAGGAAGAGAGAGATTGAC
AGAAATAATATGCTTTTGTTGACAAGAATGTCTGACATTATGAGTGCAAAAGACGACAAATTCAACAGGAACGATAACA
ATAATAAGAAGAGAAGTAAAAGCCTAAACATGGAGCAACGCCAGAAAGAACACGACAGACTTGAACGAGACAACATCCG
GGTGGCAAGAAGACTTGAAGAGACCAAACCCACCTACAAAGTTGATGACTGGGAAAAGGATTACAAACACAAACAGCAA
CTAAAGGACTCATGGCAGAGACAAAATCAGAGAAAAAATTCTCCATCTCGTCAGCCACGACAGAATGCTAATGCAAAGC
AAAGACATAGACCAGATGACCAAAACTCTGGTTCAAGCAGTGATACAGATGATGAAAAGAGAGACAGGCTGCCACCCAT
TAAAAGTGCTCAACCAAGATCCAGCGACTCTCAACCTGGGACAGCCAGGTCAAATACACCTAGAAGTCAAGCGTCAGCC
ACTCCAAGGAGATCAAGATCAGCTAAAAATCCAGATCGAGAACTCTGGATGTATTATGGAATCAGACCAGGTGCTTCTG
ATGATGAAGATGACTTTTACAACAAATCTCCATATATGGACCCCAAAAAAGAAAAGGAGAGACGACGTAAACATAATGA
AGGGAAAAACATGGCAGATGTGGATGCAAAACAACTTTACAAAGTGGCTAAGAGAATGGCTCCTCCACACGATATCATC
ACAAGAACACTAGCCAAAAAGCCTTATCATTACAGAGAAAATGTTAAAGAAAAATACAAAGAACATTATGATGCCGAAC
TTGAACAAGACCTAAAGACAGGACTTGGAAGTGAATGGAATGTTTTAATTGAAGGCCTTCTCAATGAGCCTAGCACTGG
TCAAGGGAAAAGTATTGGCAAGACTGTCAGGAGCGGAGATGCAGTTGCAATTGTGAAAAAGGTCACACCTCTTAGCTCA
CAGGAACTAAAAAGTCTGAAGGAAGAATATGAAAAAGAGAATTCAAACAGCCTTGAAAGTGACATCTCAGAAAATTTCA
AAAACCCAGTGGAAACTTTCCTACTAACTTTGGTCAAGGGAAATAAAAAAGAAAAAGCCAACAGAGAAGAAGCTGAAAA
AGATGCCAAAGAACTCCTGAAGTCAGATGATGATCGGTGGACATCAAACAGTGGCAAGTTTTTTAGTTTACTTAAGAAT
AAATCTACTCTTCACATGCGAATGGTCTTTGAAAACTTCAAAAAACACAACAGAGGCAGACCTGCAAATAAATCTGTGC
AAGACGAGTGCCCTAAACAATTTGCTGAGGCTGTTTGTGCTTACATAAGCTGTACTGAGACAGCCAGCACAGAGCAAGC
AGATTACTTACACAAAAACATGGACCCAACAAATCCAGATTTTGTTAAAACTGTCATTGCCAAATCAGAGACTGACCTA
CAAAAGGTGAGGAAAGTCTACAAAAAGAAGTATGGAAATGAGATGGCAGATGATCTTGAGGAGCGCAGTAACCACACTA
CTGTTGGAATACTTAGAACAATCATTATGAAAGATCCACCCAAACCCAAGGATAAAAACAAGCAAGCTAAAAAG
>00013 12 reads, 1755 bases
GTTTTGGTCTGTCAGTCGTCTTAGAWCCTTGGAAGTGCTATTCTCTCACAGTAAACCACATCACATGCAGGATCTTTTC
TGCATGTTTTGCAAAGAGCTGACCGTTGTTACCTTTGACCGCTTTGCRAGTCACGTTTTCCAGTCCTTAGTTCAGTATC
TGCCAGCTATTTATGAAATAAGAGACAAAAATATGGACAGACAGAATAACCCACCTAGTTTAAAGGCTGCTATTGAACA
AGTCTGTAAATTTATGGAGTCTCATATGCGAGACATMATGACTCATACCTACGCAAGTCATGTTCTAAGATCATTTCTT
GAGGCTCTAGGGGGTGCACATGTGAAAGAAGAAGTTGTGCGCAGTCGAGTATCTCGAACGCATCGCAAAGCTGAGGCTG
CACCTAAGAAAACTAGCGCTGAAAAATCACTTTCCCAGGATTTTCATGATTTTTTTATCATCTTGAAAGAAAAGATAGT
AAAACTCTGTAATTTTGAAGATCACCTGAGTGATGCAAACTACTGTCCAGTTTTGCAAACAGTTCTGCTGATTTTGCAC
AAAACCTCAACATCAGAATATGAACAGCTGTCAAATTTAATACTACAGAAATCTTGCGCAGCAGTTACAAATGAAGACC
ATGGTGCAGATGATATCACCAAGAGGATACCCGATATTGTACAAAATGAAGTGGGCTCCTATCTCATAGAACTTCTAAT
TTCCTTAGCCAGTGAGTCACAGATGAAAGCCATGTATGATCTTCTACTCAGGGGGAAGCTGATTTTCTTTGCTGTTCAT
CCCTATGCCAACTATGTCTTACAGAAGTTCCTGACTTGTGTCTCAGATACAGAAATGTTTGAAGATTTATCTAAAGACA
TTATTCAGTATATGGAGGACATCTTAGCTGTTAATCACACAGGAATCATCACCAAGCTTGCAGAAGCCTGCAAACGTAC
TGGACAAGGTCAGCATGATTTTATTCAAGCTTTAATGAAAGCTTTTCACTGCCTTGAACCAGAATCACACCAGGTTAAG
CTTGTTCCTCTTTTGGCAAGTCTACAGACGTATGATGTATTTTTTCAGACAGAAAAAGCCTTAAATGAGTCATCAAGCA
GCCTCCTGAGAACAGTCAATATTCATGGTTCACTTCTCCTACAACAACTGTTTCAGTTTACCCACACCAAAAAAATAGT
ATCAAGTCTGCTGGACCTGTCCCCCACTGAGCTGACCGGCCTTTGTTGTGATAAGTGTGGCAGTCACATCATAGATGTT
TTTTTCCAAAGTAAAACTGTTTCTGACAAATACAAGAATGCTCTTCTCAAGCATCTCAAGGGTGTATATGTGAACATTG
CATGCAACAGAAATGGATCCAGGTGTTTAGAAAATATTTGGAAAGTATGCTCACTGAATCAAAGAATAATGATTGCTGA
TGAACTATCAAAGAGTCAAGAGCGATTAGAGGGTGACCAGTGGGGACGTTTTGCATACAATAACTTTGCTTTGCACAAG
TTCAATCAGCGTAGGAAAGATTGGCTTGATATTCAAGGGGCAAGTTCTAAAAAACAACAGTTGCTSCAAAACATTCTTC
AAGGCACAGTTTCCAAAAAGAAGAGAAAGAGTAAACAAGGAAGTCAGGTTGAAAATGTTTCCTCAGAAACTGCAGAAGT
TAAAAAAACTGAAAAATCACCAAAATCTACCAATAAGTTGAAGAATCACGACAATGACAGTAATGCTGATCTTAAATTA
GAGGAAGTGACAAGAGA
>00014 9 reads, 1629 bases
GGGTAATACAGGATCCGCCATTAATGCTGCCTTGGAAGTTCCGAAACGAACCTTTCCTTGATTAAATACAATGTGTTTT
CACAATTAAATAACAATTTATTCACCCCACAGAAGGATTGACAGGGTGTTATTTTGAACAATATGGTATTCAATATGAA
GATTTGAACGGTAATCGTTGTGTCTGGGGTGAGAGGATTACGTCTACGTMTCTTCACAATCGTCATTCACATCTAAACA
AAAGCAAATAATTTGAGATTGATCACTGCCGTTTCATATTATTTGTGACATATTCTTAATTAGACCTACTCCTGTGCAA
CATAATGAGAGACTGAATTTTGGAATGTGTAAAAGTGTTTAGGATTAAACAAAAATGGGAACAAGACACATACCAAGTG
ACAAGATCAATTTGAAGCTCATACTTGTCAGTGGCAAGACCCATGAGTTTCTCTTCTCACCATCAGACTCAGCGGCTGA
CATCGCAGATCATGTATACAACCACTGGCCTGAAGATTGGGCTGATGAACCCATGCCAGCAACTAATATATTGCGGCTT
ATCTATCAAGGCCGGTTTTTACATGGCAATGTTACATTAACAGCTCTCCAGCTCCCAACAGGAAAAACCAGTGTGATGC
ATCTTGTGGCTAGGGAGAATCTTCCTGAGCCCAACAATCAAGGTCAGTTGAAAAAAGACAAGAGCGGGGAGTCTGGCTG
TAGTAACTGTTGTGTCATACTCTAGTAGGTGATCCCTGTGACACGACAGACACACACACTCACTCTCGGGGGAGWGCCC
ACCACCACCACCANNNNNNNNNNCCACCACCAACAAGTTTATTCATCTCTTCGTTTATACCAATCAGAACCTCTACTGT
CACTGGTCAGTCAGTCATTCAGTGAAAGTACCTCCTCATTTCTTTATACTTATTTTTTTGTGGGGCTTCGAAGCAAGAC
CCATGCTGCCAAGTGGACGTGTGTTGATGTAATGTACAAAGTGGTTGCTGGACGATGCACGTTTGACCTCCCCCGCCCC
CAGATATATATATCTAGCCCAAGACGGCCTGGTGTACATATTTTATCTTTGGCCCGACTGAGAAACATCTCCTTATGAC
TCATGGAATTTAGTTAAAGGAACCAATCAAATTTCTCAGTGTCAAGTTGGATAGCTCATCTTTTCCTGCAGTTTTGCTT
TAAAGAGTTTCTTGCAAGGGCCACAGTGTCGAGAAAGTTCTGTGTTATGGTGACATACGCGTCTCAGGTTAAATTTTTT
GTTACTCAGCCACGAAACTAAATTATTCTCACCTGTTTTACTATTTACTCATGGTCGTAAACATAAGTGTCTAAAACTG
ATGTTTTTAAACAAAAATAATAACACTTTATTTGAAAAGTTAGTTTTGGTATGTTGTGTGCACAGTGTTGCATAATACT
GCAGTTGTCAATGATTATCTTACTTACACATAGCTTATAAGTGTTCTCTACTTTTTTTTAGAATCTTATCTTTTAATTG
GCATTGTTTTAAAACTGTTGATTGGTGTAAGGTTTAAAGAAAATGCTTGAACTACAATAATTATCATTTTGTCATTATT
GATGCATAAATTAATTTTAAAAGTGTACATATCCGTTCACGACTCTTTA
>00015 10 reads, 1708 bases
AGGAGTTAAACATATCTTTTTTAAATATAGYTTYATCTTTTTCTTGTTCCTCCCAAAAGGTCTGGGACCACCCTTAGGC
GTCTTACTGCCACCCTTAGATTTCTTATATGTGCCTGCAGCCTCTTGTCTTTCCTTGTAAGAGGGACCAGATCTGAACT
TCTTTACAGCTGATGATCCAATGTCTGCCAATTCTTCTTCAAATCCACATTTTCCAGATTGTTTTCTTTTCTTGTTTTT
CTTTTTCTTGGATTTAACTGAATCTGGATCTGAATGGTCTGCAAATGCACTCAATGGCTTGGCTTTAAGTGATTTTTTA
GCAGCTCTGATACTTAGTAACTGGGCTTTAGTGAGCTCAAAGTTGACACGGTCCTCAGCCGTTAATTTTTTTCTTGTTT
TCTTTTTATTGTCTTTCTCATCTCTATCTGCTAATCTCAGTTTAGCTTTCTCCACCTTCCTTTCCTTAAAGCTTTGGAA
CCAAGTTCTATGTGATGTGTCTTCATCCTTTTTTTCCAACATATTTTGAGCTTTTTGCATTTTGTTTTCCACAGAGCGC
AAATGGCTTTCTTCTCTTTGTTGAGCTTGAATGGCCTTTATGTCACCCTCTAGGTCTGTAATCCTAGCTCGAAACTTGT
TTGTAACATCAAGTGGAATGACCCTTGTTTTGAGAGGTGTTTTGGCTTGTTTGACTATTTCTTTGAGTACTTTTCTCTC
CTTCTCGCCAACCAGGGTCACAGATCTGCCACTTTTACCAGCTCTTGCAGTTCTGCCCACACGATGAATGTAATGTTTG
ATAGTACTTGGCATTGTGAAATTTATCACAGTTTTGACACCTTCAATGTCCAATCCTCTAGAAGCTAAATCTGTAGCCA
ACATGACATCTATCAGTCCCTCTTTAAACTTTTTCAAAGTTTCTAGACGCTGGGCTTGAGACAGATTACCATGGAGCTC
TCCTACATTGATGCCCAGTAATCCTAACAATATGTGCATTCTATGTGCCTGAACTTTTGTCTGGATGAACACAATGCAT
CGATCACAGAAGTTTCGAGATACTAGCGCAGCTACTATAGCTTCACGGTCACCCTCACGATTCGGACGTATTCTGACAA
ATTCTTGCCGCAGGCCCAGAGCAACTTCAGTACTTTGATTGACAAAAACTTTCACTGGATCTTTTAAAGACACTGCAAC
AAGCTCTTGTACTGTCTCTGTCATTGTGGCTGAAAATAACATTGTCTGCCTCTGGCGTGCACACATTCTAATAATCTCA
TTCATCTGCTCAGCAAAGTATTCATCGAGCATTCGGTCTGCCTCATCCAAGACTAAGATTTCAATGTTGTTAAGAGTAA
AGTTTACACTGTTGTGAAGATGATCAATCAAACGACCAGGGGTGGCTATAACAATGTCTGGACTAAGACGCAGCATGGC
CTCTTGAGACTTGATGTCCAAGCCACCAGCTGCCAAACAAATGTCAATGTTAGAATGCTGTGCCAGTTTCCTGGCTACC
GTATGGACCTGGACAGCCAACTCTCTGGTGGGTACTAAAATTAGAACCCGTGTTGATGCTGTTGCCCTTGGCCTGTAAA
GGAGGCGTTCAAGAATTGGCAGCATGAAGGCAACTGTTTTACCTGATCCTGTGACTGCACAAGCACAAATATCTCTACC
CATGAGTGCTATGGGTATACAGGCGGCTTGTATAGGAGTTGGTTTGACA
>00016 15 reads, 1353 bases
CTCTGATAGGACAGTACCGGWTATWGAGCTCGATTCAACTAGTGGTAAAGTGTAAGACAGTCCTAGTGTCCCAGCTAAT
TTGTGACTTCAATACTAGAACAAATGGTGTGAATGTCAATGTGACCGGTGACGTCAGCTACACCACATTCACTGATCAC
AACTCACACCCTACGACGTACATATCTGAGTGTACACTGTACATGAACGTAAGCCAGTTTGGACCAGGGTCACACGAGT
TTCAAGTTGTCATGTACACAAACAGTTCCTATAACAACAGCACGCGGGAAGCCGGAAATTTTTCTTCGCCTTATACTTT
GACGTTGCCAACTGTTCGTCTCAGGGACGATTGCCTGTCACGTGCTCAAAGTCTTTACGCCAAAACCTGGACCTCCTTC
CCCTGCACCTGTTCATTAAGTAACCAAGGGAATCCCAAAGCTACCTTTTCGTGGGTCGTCAACCACCAGATACTGTACG
CCGACACAGTAATAGCTCATTTTAGTGATTTCATTAACAACATTACTTATGAATGTGTTCCTTTTAGTGCACTGCAAAA
TAATATTGCTGGAGTACAGCTAAAAATAGATGTACCACGAACACCGTACATCGCATTATTTACTGCCAACTCCGAGACG
ACCAACATCACCGTCGGCGTTAACACCACCATCAACTTCAGATGTTACGCCGATGGCTTCCCAAAACCCGTTATTCTCT
TTGGTAAAAACAACTCAGTGTCCACATTGATAGGGAGCGGGAAGATCATAGTAACGCCTATCGTGAAATGTATGGACGC
TGGCCTGTACTGCTGTGATGTGGAGAACGCGACCAAAGTTTTCATAACAAGACAGTGCATATCTGTGTATGTTGCATGT
CCACTAAAGCCCGTTAGCAGCAATGCAATAACTGTGACGTCACTTCCTGGCGAAGACGCAAACGTCACAATTCCCGTCC
TGGGGTATCCGCGCGCCGACCCACTACATTCTGACACGGGGAGATAAGCCCCGCGAGGTCATCGACCCAAAAGGTTACA
AANNNNNNNNNNGTTAACTTTGTGGAACAGACGCCGCCATATGACGACATTGACCTGACGATTCTAAGCGTCAAAGAAG
CAAATTTCACCAGATATAATTTTGCGTTTGGCAATGGTTTAGGACGGGACCAAAATGTATCATTTATAATTCGCAAAGA
ATCCCCAGACAATGACGTACAAATTCGAAATCTCGCTTTAGGCATAACCGGTGGCGTTGTTGGAGTGATCATTATCGTG
GTTATTGTGACAGTACTTTATAGAAAAGGTTTGTTGGCGAGAAAGAGATCAAACTCGACCAGCTCTGACTTAAACAAAT
TTACCAGTGC
>00017 7 reads, 1623 bases
CCATTAAACTGTGTCGGTAGWWSWWWTAYSGGAGTTGAAAACTGTTACTTTCCTATGTTTGTATCTCACAGTGCACTTG
AGAAAGAGAAGACCCATATAGCTGACTTTGCACCAGAGGTTGCATGGGTGACCAGATCTGGGCAGTCTGAGTTAGCTGA
ACCCATAGCTATACGGCCGACTAGTGAAACTGTCATGTATCCATCTTTTGCAAAGTGGATCAAGTCCCATCGAGACCTT
CCCTTGAGGCTGAACCAGTGGTGCAATGTTGTGAGATGGGAGTTCAAACATCCACAACCATTTTTGAGAACCAGAGAAT
TTTTATGGCAGGAGGGTCACACTGCCTGGGCTGATCAGCCATCTGCTGTTAAAGAGGTGTATGCTATTTTAGAAGAGTA
CGCTAGAGTTTATGAGGAACTGTTGGCCATTCCAGTAGTCAGGGGTAAGAAGACAGAGAAAGAAAAATTTGCAGGAGGT
GACTTTACTACAACTGTTGAAGTGTATATTGGTGCAAGTGGTAGAGCTATCCAGGGTGCAACATCACATCATTTAGGCC
AAAACTTCTCTAAAATGTTTGAGATTGTCTTTGAGGATCCAGAAACTCAACAGAAGCAATATGCTTACCAGAACAGTTG
GGGTCTTACCACAAGAACTATTGGTGTCCTAGCCATGGTTCATGGAGATAATACAGGCTTAGTGCTGCCTCCTAGGGTA
GCATCATTGCAGATTGTAGTGGTTCCCTGTGGCATTACTGCATCTTTGTCAGATGCAGATGCTAATCAGCTGTATGCCA
AATGCACAGCTTTGGCATCAACTTTCACTGCAGCTGGCATACGCAGCAAGGCGGATATCAGGGACAATTACTCTCCAGG
ATGGAAGTTTAATCACTGGGAGTTGAAAGGAGTCCCAATAAGAATTGAACTAGGGCCCCGTGATCTTAAGGAAAACCAG
GTGGTAGCTGTAAGACGTGACACAGGAGAGAAGAYCACTGTGTCAATGACAGTTGTGGTGGACTCAATGAAAAAATTAA
TGGAAGTCATTCAAGACAGCCTTTACAACAAAGCAAAGAAAGAGTTGGAAGAGAACTTGACCGTCTGTCACCAATGGTC
TGAGTTCTGTGACAGCTTGGATCAGAAGAAACTAATTCAAGCTCCATTCTGTGGAGAAATTTCTTGTGAAGACAAAATT
AAGAAAGACAGTGCAAGAGATGTCATTGTTGAAGAAGGTGCGCCAGCTATGGGTGCTAAAGGCTTATGTATTCCTTTTC
AACAACCCCAAGAGTTGAAACCTGGTACCAGTTGCATTATGCCAGACTGCAAAAATCCAGCTAAACACTACACCATGTT
TGGTCGTAGTTATTAGTCAGCTCAATATTTTCTCAATTTCAAATGATTGATAAAAATTGTTTGAATGTGAAAAGTTAGC
ATTAAATTACTATGGGAAATTATAACTACTTCAACTACTTCAGTTTAATTAATGAGTATGTTTCAAAGAATCATAAAAG
CTATGCTATTTAATTATTTTCTGTAGTAGAAAAGCTTATACTTATAGTATTGGTTTACAAAWGTTATTWAWCTTAWTGY
ATGTGGGGATTGTGATTATGTGATGAATTGTAAAACTTTAAAA
>00018 3 reads, 1539 bases
CCCATTATACAGCAATCCAASWCGMTTAAWTTTTGGCGCGGGGTACAGCCGAATTCTTGGAAATAATTACAAATTTACA
ATGTTTACAACTAATTAATCACCATGGATTTACGTTAGTCTCATCATGTTAATAATATTCGTTGACGTGGATAAAATAT
TTATGTGAAATCATTCACAAGCTTGAAATAGTGACCATTTTGTACAGTTTTGTGTAGAAAAAGAGATGTAGTATAAATG
CATTATGAACGGTGAAACCCCCAGTGTACCTATAACAACTTTGGCTGGGGTGGCAAGTTTAACAGATTTGCTACCGCAG
CTTCCCCYACCCACTCCGTTACCTCAGACTGTCCAGAACAAATCACTGCTTTATAGTCATAAAATAGCTGAAGATGCAC
GACMACTTTTGGCCTTCATCAGATGAAGGCCTGGGCAGTCAGCTTGCACACGCCTTACGACAGACCAATTCCAGTCAGA
TAGAACTTAAAGATACACTGAGCACAAATTCAGTTGAAGGATACATCCCTAGCTTACTTCAAACTGTGATGCGGAAGGA
TCCCCATATCTTTCAAGGTATTCACCCCCATGCACAACAGTTCAGTAATTTCCTTCAAGAAGGTCAAAGACTCTCTAGT
GCACCTATTCATGGTTCCACTCATAATATTCAGCAGAATGTGTCTCCAAGGCATGGACAAGCTCAGTCACCGAGATATC
CCCCTAATGTATATGCCTCCCCAAGCAACMGTCCATACCTTGCTGCAAGTGCTGGAATGGGTAATCAGAGCAACTCTGG
AATTTCAACTAATCAGCCTAATGCAGTTGCTAGTCCAGCTCAAGCAACAGCTGCAGAGAGAGTTCTACAACATCCTTTT
ACAAATCAAGCCTCTCCAGTTCTTTTGCAAAATTCGACCGATCCCCTTTCTCGCCATAACAGGCGCACTCGGAATCCTC
CAAGCATCGATCTGCAGTATCCACACGGCTTGAAACCTCAGGAACCTTTACAAAAATTAATGGATGTATTGCCAAACAG
GACTAATGTTAATTCAGTTCCTGTTCTTCCTGAGCCTGTGATTGTTTTGAATGATATTGGTGATCAAATTAACACTAAT
ATCAGTAGACTGCCTTTACCCCCTCATCTTGCAAGTCCTTCAGTTAAAAATGCAGATCCCCCTTACCAAAAATCTAAAA
TGGAAACTAAGAAAAAAAATGAACCTGTTGTAATGTTGGAAATGCTAGACCCCTCGACATTAAAATCAATTCAGAAAGG
AGGATCTGTTAAAACAGACTGTGATAGTGACTCTCGCAAGCGAAAGAGAGAAGAGACTAACTACAACATATCTAGGGCC
GCTGGACCAGGAGACATGTCCTTTCAACCTTCTAGAAATAGACGTTCAGATGATACTTACAAAAATAGGGCAGCAAAAC
GTAGACGAAACTCGGTGGAAAGCGACGATGCATCTTCACTGTCTGAGTTTGTTGAATTGGAAGAAGATGAAGAGGCTTA
CAATGCAAGAATGAAAAAAAAAAAAAAAATAGGGATAA
>00019 11 reads, 1465 bases
TTTTTTCATAAGAAACATTTTATTCTTTAAACAGATCAGTTATTCAAATGTAAAAGAAAATAAATAACACAGAGGAACC
ATTTCAGGAAAACACATCATTCACAATCATAATAATCAACTTAAGCATAGTATTGGAGATTGGCTTTCTTCTTAGCCTG
GACTTCAATAATAGCATCCATGTAATCTTCATGTGTCAGTTCAACAGCTTCTCGTCTCATTGCTATCATCCCAGCTTCC
ACACACACTGCTTTCAACTGAGCCCCATTGAAGTCATCAGTGCACCTGGCAAGTTCTTCATAATTCACATCTTTGTTGA
CATTCATTTTCCTTGAGTGAATCTGTAATATACGAGCCCTTGCTTCTTCATTGGGTTGTGGAAATTCAATTTTTCGGTC
CAGACGACCTGATCTCAACAAAGCTGGATCCAATATGTCTACTCTATTGGTGGCAGCAATAACCTTAATCATAGAATTG
GGTTGAAATCCATCCATTTGATTAAGTAATTCTAACATAGTTCTCTGTACTTCACGATCTCCTGCCTTTTCACTGTCAA
ACCTTTTGGTTCCTATTGCATCAAGTTCATCAATAAAAATGATGGCAGGTTGTTTTTCCTTTGCTAAAGCAAACGCATC
TCTAACCAGCTTGGCTCCATCACCAATAAACATTTGTACTAGCTGAGGTCCTGCTAGTTTCAAGAATGTCGACTTGGTC
TGGGCAGCACAAGCTCGAGCCAGAAGAGTTTTTCCAGTACCAGGTGCTCCATATAACAGCACACCTTTTGGAGGTTGAA
TTCCAAGTGCCTCAAACCTTTCTTTGTGTGTCATTGGTAAAACTACTGCCTCAATCAGCTCTTGAATTTGTTTATCTAA
ACCACCAATGTCAGCATACTGTTCTGTTGGCCTCTCGTCAACCTCCATAGCTTTTACCCTTGAATCATACTCTGCAGGC
AATGTTTCTAAGATCAAATATGAGTCTTTGTTCACACCCACAAGATCACCAGGTTTGAGTTTCTCTGCATCAACAAGTC
CAATGACAGGCAAAAAGTAGGTCTGGCGGGTAGATGTCTTTATGACAGCACACTTTCCTTTTCTTTGAGAGTCAAGATC
TATATTAGCTCCATCCTCCTCTCCTTGATCTTGAGGATCAACATCCAACAACTCAATCACATTTGAAACCAGGTAAGGA
AGTGTCTTATTCACTTTAATTTTTTCAGTATTTTCCTTTATTTTTTCTTTTTGTGCTTGTAACTCATGTTGAATGCGCA
TTATTTCAGACCTCATAATCTTTATCTCATTATCAAGTAACCTGGTTCTACCAACAATTTCATCTGTTGGCATGCGAAG
AACTTCTTCTGCAACTGACTCCTCGCCATCATCCCAAATAGACTTATCCTCTAAAGACGACATTAAAGCAATATGATTC
AGCAACTAGAAATTATTATTTAAAACCTATTTTGAGGCCCACT
>00020 5 reads, 1638 bases
AAAACGGGAAAGACGGAACATTAAWYTGACWGTGAGCTCATCAAACAGTTTGCTGTTCATCTCCATGAAAGTCTTAAGG
ACATTGTACACAAGAGCTACAATTGTTTGGTTCCAATGTTCCTTAGAGATGCGGTATAGGGCAGGAAACATTATAGGGA
GCACAACGTTGGAGTTTTCCTCAATCAAATTCATTATGTACTCATTGTTCCAAAAATACAAATGCTCGTTCTGCCACCT
GAAAGTGAGGACTTGATACACATTTAGCTATCTGGCGAAACAGGTCTTCCTGAATCCTTTGAAACTGAGTAGGTTCAAT
GACATCTAAGATTTCTTCTATTTCCCCTAAAAACATCACCTCTTTTTGACTGCATGTCTTGGGCCAGAACTTCAACAAT
CCCTTTATCACATCTTCTGTTAATGAAGCATCTTTTTCCAAAAATTGGACAACACAGTAAGCAAGCTGAGCATGATACA
GACTTAAACTGCGAGACTTATGCAGTGGGATGAGAACTTTCATGAGGAATTGCCTATGTTCTGCCTTCAGGGGCAAAGC
AAATCCGTTGATAATACTACCTAGAATTTCTAGGAGTTCCCCCACACCATTAAACTGCTCAGTCTCATATATGAACCTG
AGAAATATATTATTAATCTGTTTCCTAATGAATGCTCGTAATCCCAAAAATTTGCCATATATCCTGTGGAGGACAGTCT
TGAGAAAGTCTCTTTCACGTGGGTCTTCACTGTCAAAGAGCTCCAGAAGCTGAAGTACAAATCTTTGGTCTATATATTT
TTTTGCCAAACTGGGCTGGAAGTCTGGAGATTCTAAAAAGCGTAGAAAAAACTCATACACAATTTGTAAATGTGGCCAC
GATGCCTCAAGAGTAGGGTCATCTTCTTCAGGATCAAAATCTGGGTTGTCATTTGGGGGAAGAGTTCGGAAGATATTAC
AAGCAATCATGCGAACAACTTCAGGATACACAGGTTCTGTAAGCACATTACGAGTTGCAGTGATATAATCTACTAGTTC
ATTAAGAGCTGCACGTTTTATTTCCTTGCTCTTCAGGTCTGTAACAGGGTCCATAAAGTCAAAAACCACACAACATTGC
TGTAGCTTCTTAATGAAAAGATCCTGCTGTTCATTTTGGGGTGTATCTTTCAAATGAGGTAACGCCTGAAGCTCTGGTG
CAGTGTTGGCACGGTAATGTGATGATCCTTGTGATCGCTTTTGTTTCTTCGATTTGACAGCTGCTTTAGCAGTGAATGG
GTCAATACGATCGGCTAGTTTTGCCGACATTGTGATTTGACTATTATTGCGGTTAAACCGCTATGAGGTGGCTAAAGCC
CAATTTACATGTGCTTCAAGATTGTTTCGTTATTGGACATTTGCAGTCTTCAAGAACTGGCATACACTTACACACTGGA
CAAGTTATTTATTTTACTCTAGCCGATAAAATCCGTGGATACACTTGACAGCACAGGTTACCGACTTCTTACTAATTAA
ACAATTATTTCTTTTCCGTGTACAGTGTTGTTGTTAAGAGAAATGAACGTCTTATTAAAAAAATCGATAAATGACATGC
AACTTAAAAGATTGCTGATTAACAATGAGGAAAACAAAAGATCGCGGTGTGTTGCTAC
>00021 35 reads, 1474 bases
TATACCCGTAGTCTAGATACTAAGTGGTCTATATTAAGTTTCGCACAAAACACATTAATTTAATTTTTCCATATTTAAT
GCAAATGGTCTCCTAAAAATTATTTATTTTWAAAATCTAATATAAAAGCATTTTAAGTTTCATTATATTTAAAATATCT
CAAATCTGCATATAAACATGATTTACCTATTAAGAGCCAAATAATCTACACTCCACTTGTGTGATAAAATGGTTCTGAG
TATTTTGATAACAGCTCCTTGTTCAATAATCAACCATTCAAGACAGGCACATTCTTGCATTTTAAAMAATATTTTTATA
ATCTGGTGTATACAAATACAACTATGGCTTAACACGCAAAAACTTATTTATCTAACATGAAAGTGAATTAATATAATCG
CCATTTGATGCAGTCTTCGTGGGATGCATAACAATGTACAGCGTACTAAAGGACTCAATTGACACAATGCTATATCAAA
CAACAAGACTAGGGCGTCATGATAGGATCCCTTGGATTGGCCGATTACCTAGTATCTAGTTCATCATGAGATGCCTGCA
AGGAAAACGTGAGATGAAGTAGTCACACACCATCATGGGTCAGAGGAGCAAGCACCCCGTTTCAATTTGAAGGAAGATG
TCCGATGACAAGACAAATGCAATGTGGATCAGAGCTATGTGAATGATGGTGCCTTGTCAGGCTGCGCAGGGTGTGATAT
AGCTCTCGGTACATGAGTATAATCGGCATGATGGTCCTTTTTCTAGATGATATATTGTCTATCGATGAGGAATTAAGAT
TACAGGCCAATCGCTCAGTGGTTGTCCACTACATGGGTGCTGGACTGTGACCCAAATTTAAAAATAGCCCTTCCGGTAA
GCCTGTTTTCACAGAGGTCTTCAAATACTTGATTGGCATCTTCAACCGGGAAGACTTTGTATTGTGGGATTTCAAGCTC
GTTATCTGCCACAGCGTTCAGGAGTTCAATGAGCTGGTTAAGGTTGCCTTGTGGGATACCAACAATGCTTTGCTGTTTG
GCAGCGAGTGCGTTCAGGGAGATGCTAGTTTCAGATGTAGAATTTCCACCAACTAAGATAAGGCCCTCTCTGTTCAAAA
CTTTAAGAGCCCTCTGCATGCATCTGTTAGAGCCAATGAAGTCAATAATAACGTCAACACCACCACGGCATGAATCAAG
TGTGCGTTCAATTATGTACTGTTCGTGGTCCTCCTCATTCCAGTGAATGATATCGTAACAACCATGCTCCTGGGCTGTC
AGAAGCCTGTCAATGCTGTTGTCAGCCACAAAGACTCTTACACTACTGTTGTCCCGACCCATCAAGTATTTGGCCAACT
TAATTGTCCACAATCCCAGGCCACCAGCTCCAACAACAAGAACATTAACACAAGATTTTACTTTGCGAAGCTTTTCCAC
ATGTGGTCTGGCACTGGTAACAGCTGCATAGGCTTTGAGTGCACCACCAGGC
>00022 6 reads, 1706 bases
GAAGTTTATTTAGTAAATATCAATTATCAAAAGAAAATGTTTTAAAGCTGCACGTGGGGCTTAAATTAACCTAGAGCCA
GGCAATTTTAGAAACAATACATGAAGAATATTTCAAAATAAGATCATTCTTTATGACCATAACAACACTGGGAATGTTG
AGATGAATGGTTTGCTAATTAAAGTTGCTTGGAGCAAAAGCGCCAGGAAAAATATTTTACTGGTTGTTGGTAAATATTG
GATTTGACTCAACAGCTATGCTTTCAATGGCGCATTCGTCAGTGCCTCTACGAATCCAGAAATATCCATTCTGACCCCA
TCCAGTGCCCCAGCTGTTTTTCACAATCCAGTACTTTTCTCCGGAGCTCTTGTCCACACCCCAGCCGACCAGAAGAACC
GCGTGGTTGGTCAGTTCAAATGGGTTAAACTTGTTGACACCAGCGGTGAACTTGTGGTGGTAGACACCAGATTGGTAAT
TAAAGAAATCATCGTACACCTCAAAGGCAACACCGATTGGGCCCTTCTCGTAAACGGCTTGCATCATCACAGCTTCATT
ACAGGCTCCATAATAGCCACCGACATATTTGTAGTTGGTGAAGTAATGGCGGGGACACTTAGGGTCGGTCTGACATTTG
CCATCCACACCCTTGTAAGGGTTGCACCCCTCCAGGACCAGGCCATAGTCCTCAGCATACTTGCCACTTATGAGATAAG
GGAAGCCACCATTGCAACCCTGAGAATATGGACTGCATTCAACAATGTCTTGAGTAGAAAACACAGGCTGCTGTGTGTT
GTTGGTGGCTATACGTACTCTGGCCTCATCCATACCCAGTGATCCAAAGGCATAACAGCTTCCACAGTTGCCTTGGTTC
CTGACGGGTGATACATAGTTGACATTATCCACATTCCTCCAGTCAAAGCTTTCAGGCAAAGATGACATAAGTTTCCTCT
GTTCATCAGTGATGGGGGCTGGCTTTGGGCGGCTGTGAAGTCGAGATCCCTTTCCTCCTGCCAAGTTAATGTAGTCTTC
AATGGTAAAGCCTTCAAATTGCTTGTATGTTGTCGCCTTCCAAGATGTCTGTGCATTGTTGATGGCCCAAACAAGAGCA
TTGGAATTCAGACCGTGACCATATCTAAGACTTGAATCCTGATGATGCTGACTCAAAACTTTTCTGACACTCTGAGATT
TCTTCCCGTTGTAGCATGCCCAGTCACGGCCAAGAACATCATGGGACCAGCCCCCTTTAATGGTGTCACAGAAACTGAC
ATTGCCTTCAAAGTATGAGAAACCAAAATACTTGCGTCCAGCTACAACAACTTCAAAACCCTGATTATATATTAAAGTC
CAAAAACCTCTGTTGTTGAATTGATCAATTGCAACATCAGGATAGATAAGCCTAATTTTGATTTTATTTTGACCTGATG
AAAATTTTGAACAGTCAATAGAGCGATCATTATTTCCTGGTCCAACATCAAAGACCCATTGCCCAGCAACGTCTTCGTA
AGTACAATTTGCCGGAGTATCAGCCTTCACTGATACTAGTAGTACGCAGCAAAATAACGAAAATAGTCCAATATTGAAA
TGGGACATGGTGAACGATGAAAATTATTTTTTTTTAAACCGAGAAATAAGGAAATATATTAAATGGTTTGATGAACAGA
CCGAACAGGACACARTTRRSYMATTAAAACTCAAGAATATAACATCT
>00023 2 reads, 1686 bases
AGGTCTGGACGCACTTTGTTCCGTACACGATAATGATAATGACAATGGATAGGAATGGCACAATTGCCTTCCTACTTCT
ATTCTTTTGTGTAGGAGTGACCGTATCTTACAATACATGTCAGCCTACCATGGTTCATATTGCCTACGGCGATGATGTC
TCTAAAATGATTATAACCTGGAGCACGATTAATGACTCTGCCTCTGTTGTTCTGTATGGAGAATCCGTAAAATATCTCA
CACTGGCTCAAAAAGGCAACAGTACTAAGTTTACAGAGGCTGGTGGTAAATCAACACGTTTTCAGTTCATTCACCGTGT
TGACCTTGAAAATCTAAAACCAAACACCACTTATTTCTATATTGCTGGAAGTCCCATGGGTTGGTCATCCACTTTTCAC
TTTAGGACAATGCCTGCTGGAGAAGACTGGAGTCCAAGTTTAGCAATTTTTGGAGACATGGGAAGCATAAATGCTCAAT
CAATCCCTCGACTTGTCAGTGATGCATCTCTTGGAATGTATGATGCCATTTTACATGTTGGTGACTTTGCATATGACCT
TACAGGTGATGATGGTAGAGTTGGTGACCGTTTCATGGAACAAATTGAGCCCCTGGCATCAAGTCTACCATACATGACT
TGTGTAGGCAATCATGAAAACTATTTCAACTTCAGCAAATACAGATCAATCTTTAACATGCCCAATGATAACAGGAAAA
TGTACTACAGTTTTAACATGGGGCCCATTCATTTTGTGTCAATCTCTACAGAGTTTTTATACTTTCCAAGTTTTGGTTT
TGATCAGATTGAGGACCAATATGAGTGGGTTAAGAAAGATCTTAAAGAAGCTAATAAACCCGAAAACAGACAAAAGCGT
CCATGGATCATAACATTTGGCCATCGGCCCATGTACTGTTCCAACAATGACAACGATGATTGTACAAGTTATGAAAGTT
TGGTGCGTGTCGGTGTTCATGCTATGGGGGTGCATGGGTATGAAGACCTGTTCCATCAGTTTGGAGTTGATGTGGCCAT
CTGGGCTCMTGAACATTCTTATGAGAGACTCTGGCCAGTTTATAATTTGAAGGTTATGAACGGCAGCTACGAAGAGCCT
TACACAAACCCTGGTGGCATTACACACATTATTACTGGCTCTGCTGGTTGCAGTGAAGGTCATGAACATTTTGAAACAA
ACCCTCCTCCTTGGTCAGCATACCGCAACAGTGACTATGGCTTCACCCGCATGAGAGCACTTAACAAGACCCACCTTTA
TTTTGAACAAGTGTCTGATGAACAGAATGGCAGAATTTTGGACAGTTTCACTCTTATTAGGGATTACCACAGCTCATAT
ACTAAGAGGAATGAATAAACTTTTATGAGCTGTTAAGCTAACAGTTAAGATGAAATAAATATCATTCCATTTTATATTT
ATGTAAAGTATATTTTATAACCACTTATGTCATGGAGATTGTAATCACAACCAGTCTCTGGTGCAAATTTTGTGTGTGT
AAGATTCAGCTTTATTCAAAATAATGATTAGATTACAGCAGGGAAAAAGATAAAACAGTTATTGATTGGTTTGGTGAAA
GGAGAAATGAACTAGTTTACTGATTGATATACAAAATGAATTTATATATTTGAAGTGCAATGATTTTTGTATTTAGATA
TTCCAAAGGTTTTGAATTATTTTAGGC
>00024 6 reads, 1701 bases
CAGAATATAAACTGTTTTTAAACCTTCAACCTTTGACCTTATAGCTAGGACACCAATCAATGTGTTGAGTGACAACCTT
TTAGAAGCTAATTGTTCAAAGTATTCTTAAATATAGTTGCGCTAATGAAAATTACTTAAATGTTACCAACAGTAAATAG
AGATATTCAGTATTTACATATTATTGTGCTTGTGATATTTTAGACATAGTATTTGCGTTTAGAAAATTAATTCTTAAAA
GAAACAAATATTAAAAACTCTTACAATTTACTATCTGTCCTTTATTTACCCTCATTCTTACCTTAATCAAAATCCTAAA
CGTAACCTTAACCCTAGCCCTAACATTAACCCTAAACTTAACCGCTAACCTTAACATGAATGTTAATAAATCCGTCCAC
AAAAGTCTGTCTGAAATAATTAGGAAAGATAACCCAAGGAAATAAATGCAATAGGTATGAATAACTGACATTTATAGGA
TCTCATATTTAGAGCTACTGACATTTAGAAAAATTGGCATTTCAGGATAAATACCATTTAATTGTAACTGACATCTAGG
GATATAAATAGAATCCCGAGAAGATGGAATAGGCATCTCCGACAAACTCTCCACTGCTGGTCGTCTGCACTTGAACGTT
GACCTTTTGACCTTTCTCAAGGGCAATGACAACTCCTTGACTTGCACTTTGGTAGTTCTCAATGGTGGAATCAGTAAAC
ACCGATGTCCTTGCCTTCTCCACTCCATCCACTTGAATGACACCGTCGACATACCCACTGTCATTGTCTTGGCGAGAGC
GCAGAGTTACTTGAAAGAAGTACTGGCCATTGCAAGGGGCGGTAAACTCCCCGTTGCTCACGTCATAGGCGTCACCCTT
GTTGCTAATGACGCTGTCAAAGATGGCTGGCCGTCCACCCAAGATGACATAACCCTCCCTCGTGGCAAACCTCGCGGAG
AAGGACACCCGGCAGGTTTCGTCATAAGATTGTACTTGGGATCTTAGCTGCTCGTTTTCTTTGACCAAAGTTGCTTTTA
TTTTAGCAATCTCGTCCCAGACGTCCTGACAGTTGCAATCTTCTGTCTCTGGTAGTTGGATGAAGTCTTTGGAAGGCGG
GGGTGTTACAGTAACATTGACTTGTCCAATTATGTAGTGAGGCAGGAATGTTTTGTCCACGTAGACATATTTGCAGATG
TAGACACCACTATCATCAACAACGGGCTTAGTAATGGAAATGTTTAGACTTGGTAGAATGCCATCAGTTTCTTGGAGTG
TGCCTTCTGCTATAATCCTGTCATCCTCGCCAGTCTCAAGGCCAGTGGTCTTCTGTACAGCGATTTGCTTTGTTTCATT
TCCTGTTTTCCCGACGTAGATCACAACTGGAATCAATACATTTTCATATTCTGGAATACGGCAATCCAGTTTTAGAACC
TCTGTGAAGGTTTCCACGGCAACTCGTGGAGAGGCTCGGAAACTTAAAGGTTTCAATGTAGCTGACTCTTCCCGTCTGT
GTCTAAGTCCAGACGTAGAACTCAACACCAAACAGGCGCAGACGAGATGGGCAGGGAACCACATTCTTCTTCTCTYTGA
CAGAAATGTTCCACTCACAGGATTCACACAATCAAAAGTACAGCAGGTCACAGACTATATTAGATCGTGMWGAGCGATT
AACAGAATGGATATTTTTCACATGCCAAGAGTCTCCTTAATG
>00025 4 reads, 2165 bases
GTGAGCTTTAAAAAAGCTCTAGAAGAAAGAGATGCACAGTTTTCARAAKCTCTTAKAGAATAAGCAAACCTTCTGCGTT
TGATTCAGAAAATGAGACCAAAGACCAAAAGTTTTGAAGAGGTGGAAAAGCATCTGGATAACAAAGAAGATATAGATTT
AAAAAAGAAACTTTTTCCTGGATTAGCCATTCCAAATGACCCCAAAATTAGAAGCATGCTGAGTGATGGAGACTACAGC
AGTGAAGAAGATGAAGAGAAAGGCTCCTTTACGCCAGAATGGAAAGACGAAAAACCAAGTTCATCTCGAACAGGAAAAG
ACGGGGATGCCTCTGTAGCCAACAGCATGATGATGGAACTAGAGGCTCTACTTGGCAAAGCAGCAAAAAAGAGTAGTAA
AGATGTTCACGCTRTTGAAAAGAGAAAGCGAGGCAGAAGTCGTAATCGCAGCAGGAGCCGCAGCCGTAGTCGTAGCAGA
GACAAAGACAGTGACATAGGAGGCGACGATCCAGAAGCAGGCACAGAACTCGTAGCAGATCACCTAGAAGTCGTTACCA
CCACAAAAGTAAGTCTCGATCACGAAGCAGGGACAGGAGCCGTAAAGACAAAGATCGCAATATAAGAGATTCTGACAAA
ATGAAAGGAAAAGACAAGTACAACGATATCCCATTAGAACCTCTAGTTGGAGCTATTTATGAGGGCAAAATTACATCAA
TTTTACCATTTGGATGCTTTGTACAACTTGAGGGTCTCAGGAAGCGATGGGAAGGACTTGTACACATTTCACAGTTACG
AAGAGAGGGAAGAGTTACTAATGTTGGTGATGTTGTTAGCAAAGGCCAGAAGGTCAAGGCCAAAGTACTCTCATTCACA
GGAAACAAACCGAGTTTATCTATAAAGGACGTTGATCAGAGGACAGGAGAGGACCTGAATCCTAGCAGTGTCAGTACTG
GAGGGGAACTAAGAAATGAGGACAATTCAGCTCGTAATCCTGATAGACCAAGTACTCTCCCTCTAGTAGATGCACCAGA
GCTAGAGGATGAAAAGTCTGAAATGAAAACATTCAAGCGTATGTCATCACCTCAGAGATGGGAGTTGAAGCAGATGATG
GCAGCCAACTGTATTGATATCACAGCACTGCCTGATTTTGATGAGGAGACAGGGCTCTTACCCAAAGAAGATGATTCAG
ATGAGGACGTTGAAGTTGAAATGGTAGAAGAGGAGCCTCCATTCTTACGTGGTCATGGAAGACATTGGGTAGAACTCAG
TCCTGTAAAGATTGTCAAGAATCCTGATGGCTCCCTGGCCCAGTCTGCCATGATGGGAAATGCGCCTCCAAAAGGAACG
CAGGGAAATGAAACAAGCACAACGAGAGGCAGAGGTCAACTCAGTTCCTACAGTACTCAATAATGACTGGATTGATCCC
ATGCCAGAAGATGGAGGAAGAACTCNNNNNNNNNNTGGCAGCCAACATGCGTGGTGTGGGGATGGCGCCCAAAGAGGAA
CCAGAATGGAAGAAACATATTAGTGGTGGTGCCAAGGCATYTTATGGCATAAAAAAAAAAAAAAAATAGGGATAACAGS
GTAATCACTCCTAAACATATTCTCTGTAAGTGTAAGACCTAACTAAGGGATGAGGGCAGGGTTTAGTACTCAAGTTAAA
GAATATATTTTTAACATTAAATTAAAACCCCAAAATATATTTTAAAGAAAGAAATTAAAATACTAAAATAATGGCAATG
AATATGCATATGGAGGCGCGTCGTCGCCAAATGTTCATGGAGAGGGTTTGCGAAGCAAGACGACGAATGGCGCTTGCCC
AACAACAAGACAATCAGGGAGGAGCATCAAGCAATTTCTCTTCACAATCAGACCCAATGGTTTGCGTTCTTGTTTCTTA
CAGAAATCAGACAAGGGCTTGTATGACTTCAAGGCAAGAAATGGAACAAGAGGATGAAAATGTGGAGTCGTATCCTTTA
AGACAAACCTATCGCCCAAAGAAGACTAACTTAGCTACGCCATTGACTCCTAAAACTAAACCCTGCCCTTCATCACTGG
AAGGGGTTAAGAGAGACCATATCTATAAGATTCTTCATCCTTATTCAGAATATTAAAGTCTGTAACCAACTCTTTTCAA
AGGAAAAGTTATTCTGAAGTGACAGACGAATA
>00026 37 reads, 1066 bases
ATCTACACTCTTTCCCTACACGACGCTCTTCCKWTYTGTTTTGTGAAGGAAATCATTTATTCAGTACACAAGATTTATA
TATACATTGGCCCACATTTGTTACAATAGTTTGGAGTCATTCTATTCATGCTGAAACGCTAGGGGCATAATTTTTTACA
ATTCTGTCAAATTCAGATTCCTTCTGTAAGTAGTCTTTAACAAATGGGTGGCTACGATGAGAATCCTTCAGTTGTGAGA
TGTATCGATTACTGACCTCAGGGGCTTTTCCTAAATGTTGACTAAGGACAATCATATTTATAATAGTTTCAGCATTGTT
GCTATCTTTGTCCAAAGCCTCCTGCAGCACAGACTCGGCATCATCAAACCTTCCTTGGGCCATGTAACAAGCAGCCTGA
CCATTGAGAAGTAAAGGTGTGCTGGTGTGTTTGTCTGCTAGCTCTTGGAAAATGTAATAAGCATCCTGATATTTATCAC
CACCCACTGCTAAATTAAACCAAGCCTGGGCCAATTGAAATAGAATGTTATCTTCGTCAGCATCTTGCATTCTTTTCAA
CTCTTTTTTAGCAAGATCCACTCTGTCTATCTTTAATAGAGTCTGCACCATCAAAGCCATGCATTCTAAGTTGTCAGAC
TGGTGCAAGGTTCTCAGAGCTGAGTCATAATTCTGCTCATGATAGTAAATTGATCCTGCCATTAAAAGGAAGATATTGT
TGCTCAGATCAACATTGCCACTCATCTTTGAGTCCAAATCTCTTAAAATGGCATCCCTGCGTGATTCGTTAGATAAGAA
GTCTGCATAAATCCTAACTGCCTGAAGCTCAGCTGGAGCAGATCCTTTGATCTCATCCAAAACAACACCATACTTCTTT
TGAGCAATGTAAGCTCTATACATTAAGACATCACGTTCAATTTTCAGTTCAGGAGTTCCCAGATTTAATTTGGGTGCTT
CATTTATACATTGTTGAAAGTTCCCAGTCAGAAATGCAGTGCGAATGTCGAAAAGCTGATCAACTCCTTGGTTAGCCAT
CTTGTTTGTATATATATTTGTACKTACSCTGATTAYCCA
>00027 22 reads, 1360 bases
TTTATCCCTATTGTCCCATTAGAGAAACTTTAGGGTAGTAAACAAAATGGCTGCCTTCGTTGGTCGCGCAACGAAACAA
GCTCTCTTACGAACCAAACCGGCTCTTTTTAACCAACAGGCAACTCTTGTTACCTTTAGCAGAAAAACTGGGAAAAGAT
TGGCCTGGGTTTTAGGTTCCATTGCTATTGGTGGTGGAACTGTAATTGCAACAGCTTTAGCCCAGCCAACTTTTGCCAG
TGATCTTGTTCTGCATCCTCCTAAGTATCCTTGGAATCACAATGGTCTCCTATCTGCACTGGATCATGGAAGTATTCGC
CGGGGATATCAAGTTTACAAGCAAGTTTGTGCAGCCTGCCACAGCATGAAATTCATGTGTTACMGAAACTTAGTTAATG
TTATCATGACAGAAGAAGATGCCAAAGCAGAGGCAGAGGAGGCGCTTGTAGAGGATGGTCCCAATGAAACTGGTGAAAT
GTTTGAGAGGCCTGGAAAGTTATCTGATCATTTCCCTAACCCATATAAAAATGAAGAGCAAGCCAGGGCTGCCAATAAT
GGGGCCTATCCCCCTGATCTGACTTATATAGTGTTAGCCAGACATGGAGGTGAAGACTATATATTTTCGCTCTTAACGG
GTTACGTTGATGCCCCAGCAGGAGTTAAGTTGATGGAAGGTCAACATTACAACCCTTATTTCCCAGGAGGATCAATAGG
CATGGCCAAGGCACTTTACAATGAAATTATTGAATATGATGATGGAACCCCAGCCACCACAAGTCAGTTGGCTAAAGAT
GTAGTGACTTTCCTGAAGTGGGCAGGAGAACCTGAACATGATACTAGGAAACTCTATGGATTAAGGGCAATGATCATCT
GCTCATTCCTGCTGGCAGTAAGTTACTACATGAAACGTCACAAGTGGTCTGTGGTGAAATCGAGAAAGCTTGCCTTTAA
ACCACCCACTTACAAGAAGTGATGACAGTTCAGCTTAGCATGGGAAAGACTTGGGGATTGGATGGGTAGGGAGAAAATA
CTTAGACACAAAGACCGGACTTAACTGAAACTAATCAATAAATAAAATATTAGAATACAAATTACGGGAAGGGATTTTT
TCCTTTCCTGGATGTGATGTCTTGTTTGTTAACCTATCGCTTAAAATTGAATTCATTAATGAATTTAGGTATGGCTGGT
GTATAAAGCATTGTTTAATATTTTGTTTTTGAATGACATTTAAAGGGAAAAATAAATTATTGAACTTTGGGGTGACTGC
TTAGTGACTTATGACCTAAATTCAATATTGGAATTTGTGGCTTTTTTTTCATGACTGTATGAAGATTCTTCTTTAGATG
TATGAATATTAAATCAA
>00028 5 reads, 1309 bases
CCCATTATATACAATAATCAATTGTTCAACGGSYRMYAGAACTTGATGAGAGCAGCGAGTATTGTACACTGAGCTCATG
ACTGTGGTAAACAAATATTTGGACCAATGTAAAGTGTAAAGATGTCGATTCCTGTTAAAATGCCGAAGGGCTGTATACA
GCCGGGCCTGGTCATTACCACAACGGAGATGCACACCGGTGGGGAACCGGTCAGGATTATTGAGTCAGGCTACCCCGTG
CCACAAGGGAAGACAATCTTGGACAAAATTGAGGACTTGAGAAAAAATTACGATGACTACCGTAAATTTGTGATACTAG
AGCCTCATGGTCACTATGACATGTACGGAGTCTTGCTGGTTGCCCCTGACAACACGGACGCTGACATAGCCGCTATCTT
CCTGCATAATGAGGGCTACTCTACCATGTGTGGTCACGCTTGTGTCGCATTGGGCCGATACGCTGTGGACCGTGGTCTA
GTGTTACGTGACAACACGTCTCCTAAAACACGAGTCAACATTCAAGTTCCCTGTGGACTAGTGCCTGCCTACGTCACAT
TTTCTCATGATGACGACAGCAAGTCTGGATCGGTCAGCTTTGAAAGCGTTCCATCGTTTGTTGTTTGTGAAGATGTTGA
TATTCTTGTGGAGACAATTGGTAAGGTGAAGGTCGATTTTGTCTATGGTGGCGCCTTCTATGTATTTGTAACGGCTGAA
AATGTGGGCCTTAATTTAGAGACATCATCCCTGGCAGACATAACCAAAGCTGCGACTGCTCTCAAAGCTGCTGCCATTG
ATGCCGTCCCACTATCGCACCCAGAGACCCCGGCATTCCTCTACGGGACTATGATCGTTGACTCACGTCACACGTTAAA
CGAATCCTCCACCAACCTGTGTGTGTTTGCTAATCAAGAGGTGGACAGGTCGCCGTGTGGGTCAGGCACTTCTGCCCGG
GTGGCTCTCATGTACCACAGGGGTCTACTTAAACTAGGTCAAGATCACATTTTCAAGAGCCGGGTCACGGGATCTGAGT
TCAAAGCAAAGGCCGTAATGGCGACTACGGTTGGCGATAAGGAAGCCGTTGTGGTTGAAGTTGAAGGTCAAAGCTTTTA
TATCGGACACTCAACCATGACAATTGAAGATGGCGATAGTCTTGGTAGAGGGTTCGTGGCTAAAAACATACCTGACGTC
CAGCTCGAGTGTCGATAAGTTCAATTATCTATGATAAAATAGAAGATGACTTATCCTATCGCAAAAATAAATAAACGTG
GGAAMAACATTAAWAATCATTGAGTCTTTTCCTTGTTGTCCAAGA
>00029 2 reads, 1244 bases
TAACTTTTAAACTGTTTTTAATCAATTTTTGACTTCGATTACATGACTTGGAACCTKACTKAAKTCATAGAAATGTTTG
GGCCTTTTATTCGAATCTGCTGGTCAGACTTCGTCCACTGCTTGATTTCACTGTTGAGGTATAGGTCATCTGCTTCATT
TCGCTGGCCAGATATATGACCCTTGCTTGATTTCCCTTGTCATGTATAAGTCCGGTGTTTAACCAGACACCTCGTGTTA
TCCCCTACAAGGCCTTGGCTACAAACTTGATGAAGATGATCAAACCAATAAGCACCGCCAGGTAGACAATGACGCACGT
GATGTAGTAGTAGAGGCGCTCGAATATCCGCGGGGCGCTCCAGTAGTCCACCACACGGAAGGCAACGCTCATTGCCTCC
ACGAGAATTTTATAGCAGCACAGGATCAGGATGTACATCAGGGAGGTCGGGAAAATCAAGATGGCGATGAAGAACTCGA
TGAGCCTGAGGAGGGTCAAGTTGATGACGACATCAAAATCTAATTTGTCCTCCACTATGGCCCGGATGACCTCAAAGGT
GAAGGGCACAACTATAATCATGGCGAAAATAAGTGGAATCGTTTCTATGGTGATGATTTGTACCATGGTGAAGGGGGAC
GACTCTTTGTCACTTAGAAACTTCAAATAAATTCAATTAGGACTGAATTTCCGAACTTTTTCCCCCACACTATAAAATC
CTAAAATCTGAATTAACAATTTTAAATCCACGACTCGCATAGAGCAAAACCTAATGTTAAAAACCCGTGGAAATTGGGC
TGCAACGTTACAGGATATTTATATGCGACATGTTGTTTCGCCGGTGTAGTACAAATGTACAAGGAGAGAGAAATCCTCC
ATGTTATGAGACGAGTGAATGCTCTTGCGCCAGCATTACAGCTTGGGTCGTTCCGGTATTGAGTCGTTTCATTACATTA
AAGCCAAACAGCTCGCAACTGGGTTGATCCGTTGCTTTCAGATATTTGTTTTTAAATCAACGAAACAAAAAAGTTGGAG
AGATAGCTTGATTTACGGCTTACTACGAGATCCAGGAAAGGACCTGTGTCTGGGGACCCGATGCTGGCATGGGGAAGGC
CGAGCACACGACTATGATTTCAATGTGTATCTTAGAAGAACTCGGCTGGATGTTAGAAGGATTTCATGTTGACATCCCC
TTCTTCCTAGCTGTGGTTATAGTGCAATATTCGATGACATAACGGCCCCGGAAGTAAAC
>00030 23 reads, 1773 bases
TTAGAGTGGCTGTTTAGCGASTCASTRAKTCACAGATTAAAAATGTGACAGACGAGAAAGACAGCTGCCCCGACCGTGA
CTCACGYCTGGAGTTGATCTTTACCATAGGATCGTCCTGTATGGGGCTCGGAAGTTTTGTCCTCGGCCAGATCAACTTC
AGGTTTGGAACCCGCGTCATGAGGATAGTGGCAGCCCTTGTGTTCATTGCTGGAGCACTGTTGACAGCATTTACAACGA
ACGAAACCCCGTGGTTGATATTCCCCGGAATGGTGCTCCTGGCTTTTGGTGGCATTGTTTACATCATGTCAAACGTCCA
GATCTCTCACCTCTTTCCTGTTGGTGGCACAGCTGTGGTCGGGCTCCTGAGTGGAGCATTTGATTCGTCAGCTGGCGTG
CAGGTCATGGTCAAGCTTGGCTATGAGGGCGGTGTGAGTAGAAAGACGTCGTATCTGATCCTGGCCTGTACACACGTTC
TCACGTTCATATCAACGTTTTTCTTCCTACCCAAAGACTTCATACATCACGCGCCAGCCTCTGAGGATCTCGACATAGA
GATGGAGGTTAAGGACTCGGACGCCAAGAAATACAAAATCACTGAGGAAAAACTAGAAAAGCTAGAGCCAGAGGAAATT
TCCGAGGTTCATGGCAAAGATGCCGAGGGAAACTTCCGCAATTTATTGAAAATGATATTCTCAAAGACATATCTGCTCC
ACGTTTTCTGGTTTTCTTTACTCCAACTGAGGTTCTACTACATACTGGGTTCTATGAACAAAACATTGGAGAAACAGCT
GGACTCCAAGAGTGAAGTAAGTCACTACACTAATGTTCTCTTGTACATTCTGATGGGCGGGATCTTCGCCTCACCTCTA
ATTGGATTTTTTGTGGAACTCAATGTTAAGATATTTCGCAAAAGTAGTACCCCATTTCGCCGGGACGTTATGCCGAACA
TTCTTCCTCTGACCGTGACCACCCTACTGGGCATCACCTTGTCTGTTCTGATTCTCATGGAGGACCCCTCACTGCTGTA
CGCCAGCTTCGTCATACTGCTCTTCTTTAGGTCCTTCCTCTATACCGTCATGACTGGTTACATTGCGAGAGTTTTTCCG
AGTGCTTACTTTGGCAGCCTGCTCGGTTTGTCTATTCTGTCCGCTGGTGTCATCGGTCTGCTACAACACGCCCTTTTTG
AGTGGGCGGAGCTGAGGAATGCTAAAGAAGTGAACATATTTCTGATCGTTCTTGTGTGTGTATCGTTCATCCACCCGGC
CTGGCAGTGGTACGCTTGCAGTCAATCCAAAAAGAAGAGTTAAATTTATTTCTAAACCCTGTCTGAAAAGTTTAAGTCC
CAAACTTTTAAGATACAAGAAGTTGTGACACTATAATGTCCTCATCATGCGCCTTACGAAAATTATCACAGATTAATTT
TTTTTACGTTTAGAGGTAGATGCCTAAAATTTCTGAAAGTTAAACGTACTTGCTTGCAACTTATTATGACAAGCTATTC
TGGGGTCCAGGCATTGCTTTTGTAGAGGATTTAGGTTAAAAAACATTCAACTTTGTAACTAGATAACTGTGTCAACCTG
AAGCCTCTGATGGTGTTCGATTGAGACAATTAAGACGGACTGTTGTCCAAACTTTAGTGTTATTGTGATTTATTGAGTC
AGATATCAGAGGGCACATTATGCTACGTCAAGGACTCCACATGACATAKGCTTGAAATGTATTTTTGTTTTATTTACCC
CTCTCACTCATGTAATCTTTCTAATTAAATATTTC
>00031 5 reads, 1503 bases
TGTTCTTCTTTTTTACCGGCTGCTTTCGGTWGAAAGCCAAGATAGCCTTGTTCGAGAATTTGTTAGTGTTACTGGTGTC
GACGCTAGTAGAGCTCGATTCTATTTAGATTCTTCAGCATGGAATCTCGAGCTTGCCATGAGCAGTTTCTTTGAGGGAG
CTGACAATGAATCCGGAGTCGATGATATTTTAATGCCTACAGATACAGTCAGAAATGAAACATCTGGGGCATCGTCAGC
AAATKCAACTGGACAAAGGATACAAACATTCAGTTCTATGCGTGTTGACTCTGATTCTTCAGAGGAGGAGGGCCAAGCT
TACTATGCTGGTGGATCAGATACAAGTGGACAACAAGTTCTGGGACCTCCCAAAAAGAAAGATGCCAACAAATTAGTTG
ACTCCCTTTTTAAATCTGCCAGGGAGCACGGAGCAGAGGAGAAGAGTGAAGAAAGTCGAGCCAGTCCAGGGACAGCAAC
TTTTGTTGGTGCTGGTTACAGATTGGGGGAAACACAAGACGATACGACAGTTGTGGTTGGTGGACCTTCAAAATCCAGA
GCCAGGGAGCAGGTTGATAAAAAATTGAAACTATGGAAAAATGGCTTCACTGTGGATGATGGCCCACTTAGAGATTACA
ATGATCCTGAAAATAAACAGTTTCTTGACAGCATAACAAGGGGAGAGGTTCCCCAAGATCTTGTCAGAGAAGCAAGGGG
AGGGGAGGTAAACCTAGACATGGAAGATCACAGAGCTGAAGATTATGTCAAACCAAAGGTTACGATCAAAGCTTTCTCT
GGAGCTGGTCATATGCTTGGAAGCGACGAACCAAACTCTTTCAGCCCCACCCCTAATGTGATAAAGTCACTGCCTCCAG
CTGGGGACAGACTTCCTCCTTCTATCCAAGTGGATGACACGAAGYCAGTCACAAATATCCAGCTTCGATTGGTTGATGG
TAAAAGAATGGTGCTAAAACTAAACAATTCTCACACTATTGGAAATATCAGGGAACACATCGTTGCGTCCAACCCACAG
TATGCCCAGAGTAGCTTCTCTTTGATGACGACGTTCCCCAACAAAGAGCTGACGGATGAGACCTTGACCTTAGAACAAG
CCAATCTTTTGAATGCTGTCATTGTACAGAAGTTGAAGTAATCTCATTTGTTCTAAAGGGGGGCGGGGAGCTGATTTCA
ATGGGAAGTTATGTTGGATGACCTGTCAGAGCCTGTGAAATTGCTCGTCACTCTGTTGTGTTGTCATTTTGTTCGATTA
TTGAATGAAGAAGGRGAGAGAATGGGAGTTTGGCCACATGTTGATTTTGAAGTTTCACTGAAGATTTCTAATCATATTC
ATTATTATTCATAGTCACAATTATTTTTAATTAATATTTTACCAGCCACCAACGTGAATTTATTACATGTATTATACAT
CTCAAGGTACGTGAGAGATGCTGTGTTAGTTGTGTCTCCAGTGTGATTGGCTAGTTTTATTTATTGAAATTTCATGTTT
TG
>00032 2 reads, 1387 bases
CCTATCCATTGAGACGWSWWGATGTWGCCGTAGACTGTGCTACACTGGGACGCTGTCCAGACGTCACGATCAGCACAAG
GTCAGGGGCGTGGATCATACCCAACTACATCTTTGGCTTACCCACCGACCTGTACGCCTGTCGTTTCTTCTTCCTGTTT
CCTCGAGCCGTTGCTAACATAATCTTTGGTCTGATCATCACATTGTTGTCTGGGAGTCCTTGGAAGTGGGGTCTGAATC
CCAAAATGAAACCGTTAGAAACCCAACCGACCGTGAGCCCAACCCTTGTACATCACATACAGCGAAGGAACATCAGAAT
AGCCCCTAATATCGTGAAAGTTGAAGGAAATAAAGTTCATTTTGTGAACGGCACATCAGCAGAGTACGACAGGATCATC
TACTGTACAGGTTACAAAATTGATTTGCCTTTCTTGCCGAGTTCTATCAAAGAAACGATTTTAAAGGAAGGTACTAATG
AAATAAAGCTTTACAAAAACGTATTCGCCCCAGACGTTGGGCCAAGCTTGGCCTTCATTGGCTTTGTGCAGCCAGCATC
AGGGGGCATCATCACCATGTCAGAGACACAGGCTCGCTGGTTTTCTCAAGTATGTAAGGGGAGAGAAGTCAAGCTTCCT
TCTAAACAGGACATGATTGCAGAYATAGATCTTGAGAAGAAAAGCCAACAAGGTCGATGGTACCAAACAGCCAGACACA
CGCTTCAGAAAGATCCAACAGTTTACAATGATGAAATCTCTAGTTTGTTYGGTGCAAAACCTAATCTATTGGCTAATCC
ACTTTTAGCCTGGAGATTGTTTTTTGGTTCCGGTGGAGCCTCCCAATGGCGTCTGAACGGCCCCAACAAGTGGAGCGAG
GCATCAGAACAGATAAAGCGAGTTCCTCTCCCAGGATTATGGAACTTGACAGGATATCTGCTGCTGGCCTCACTACTTG
TCTTCATTTACGCTAGCTTTGAAATGTTTCTGCTGTTGATTTTTTTCTTGTGAGATGTTATTACGTTGGGTTACTTTTT
AATTTAATAGAAAAAGGCTGTCACACTCTATGTGACTAAGGTGTTTGCACGAGAATTGTAAAGGTACGCGTTTTTAGAT
GCATTTTATTTATATTCTATGCCAATACAAGAATAGTTCAAGATGGTTTGCATGACTTACAATTACAGTGATTTCTGTT
TCATTGCGAGAGAACACAACTAAGTTCTAATCTAAACTTAGGTTTTTAGGCAAAAAGACTTTAAATAATAATTAGTTCA
TATCTAACGCTATATTAGTTTTATAACTGATAAACATTGATACYTTTTCAATGTTGAGCAAGTAATGCATGTGAGCATA
AAMGCTTTTGCGAATTGATTAGCTATGATTTAGGATGAATGGAA
>00033 2 reads, 1555 bases
ACCTGAGTTAACTTTTACTAGGCGCGAAACCACATATTTCAACGGATCCACGCTTTAGACCTATGCCAAAGTCCAAGAG
AAAAGTCAAAATTGATTCACGATTTCAATCATTATTCACAAATACACACTTCAGTCACAGGACTGATATTGATAAACGA
GGAAGGCCTATTCTAGATTCCTCAAAGAAAAACAAACATGTTATGGAAAGGTTCTATGAATTGTCAGATAACTCTGATG
ACAGTGGGCATGATGAAGCTGAAAATGAAGACACACCCAAARARMCTRMTMACAATAAAAAGTTAAAAAAAGATACAAG
AGGCAGAGTTGTTTCGCCTAAAAAGGATGCAAAACCAGAAAGTGATGATAAACCTGAAGAAAGTGAAAGTGAGACCAGT
AGTGAAGATAAACCTGAAAAGAGTGAGTCCAGCAGTGAATCTGAAGATGACGAAACCGAGCTCCCAGAGTTCACCCAGG
ACTTTGCCATTGAAGAGACTGAGATTGACCACAAATGGAATGAACTTCACACTGACGCCCCAGCGGTAACTGAATCAAC
TCACAGACTAGCAGTGTGCAACATGGATTGGGACTACGTGAAGGCACAGGATTTATTCATTTTGTTCAAGTCCTTTGTT
CCTGAAGGGGGGCGAGTGAAGAGTGTGACAATCTATCCTTCTGAATTCGGAAAAGAGAGGATGGCAGAGGAGGCTCTGT
TAGGTCCTCGAGAGATAAGGGAGGGAGTTAAAGAAGAAAATGTTAGAGATGATGAGGTGAAAGGTAGAAAGAGAAAAAA
AAAGCAAGTAAAAGATCAGAAAAAAATCAAGCAAACTGAGAAGGAAAGAGAAGCAGCTCAGACCGAGAAACTTCGAGAG
TATCAGCTCAACCGTTTGAGGTATTACTTTGCTGTTGTGGACTGTAATTCTGCGGGCACGGCAGATGTGATCTACAGTG
AGTGCGATGGGAGGGAGTACCAGCTTAGTTCTGTCAGGCTTGACCTCAGGTTCATTCCCGATGACATGACTTTTGATGA
TGAGCCTAAAGAAAGCTTTTCAGAAGAGCAGAGCATTGTGGGATATCAACCCAGTCAGTTCAACTCCACAGCACTGTCG
CAGGCAAAGGTGGAGGTGACATGGGATGAAACAGAACTGGACAGACTTTCACGGCGCATCGGCTCAATGCAACCCAAGG
AACTGGAGAGCATTGTTGAGGAAAACAAATTTGCTGAGATTATCGCTCCACCTGAAAGTGATTCTGAAGAAGAAGATGG
CAGGCCAGCTTGGCTTCAAAATATCTTAAGTGATGAGAAAAAAACATTRACGGAAGAAGAAAAAATCCAGCTGTACAGA
AAAGTTTTGATAGACCAGCTCGCGGAGGATGAGGATGAAAAGAAAGTCGAAGAAGGGGAAGTCGACCAGGAAGTGGAGT
GGCAGGTGGGGCTAAAAWCAAGCGTTGAGAAGAAGCTGAAGAAAAAAGAACTACAAGGTGAAAATAGCATTGTCAGTGA
TTTCTTGGAGAAGAAAAAAGCAAAGAAGAAAAAGAAGAGAGCTGAGAAACTGAA
>00034 12 reads, 1397 bases
AGACGTCTATTATCGGTCCTSGTCGAGCTGWCACTTATCCGTCTGCAGAAGATACTTTATGAAGAATACGGTGAAGCCC
ATTTTAATGCGTACCAGCAGCCATTCCTCTACTTTCAAGTTCTCTTCCTCACGTGTCAGTTTGAGGCAGCAATAGAGTT
TCTGAGTCGCCTTGAGCGCCTTGAGCGCCTTCGTTACCATGCAGTGCATGTTGCCCTGGTCTTGTATGAGATGAAGCTG
CTGGTGACCCCCTCCAGCTGCCAAGCACAACTTTTAAGTCCAGACTCGTCAGACCCATCAGGCCTAAAAAAGCTGAACA
TAGCGAGACTGATCATGATGTACACTAGAAAATTTGAAGCCACTGATGCCAGGGAGGCACTTCAATATTTTTATTTTCT
GAGAAATCTGAAAACTCCAAATGGAGAAGATCTTTTCATGTCCTGTGTCAGTGAATTGGTTCTAGAGACTAAGGAGTTT
GACATGCTGCTCGGAAGGCTTGAAAAAGATGGTTCAAGAAAGCCAGGAGCTATTGATCAGTTCAACCAAGATACACAAA
AGATTATTGAATTGGTGGCAAAAGACACAGAGTCTAAAGGTCTCTTTGAAGATGCAGTTCGACTTTATGATTTGGCTAA
GAACCATGAAAAGGCATTGAGTTTAATGAACAAACTGTTGAGTCAGGTGGTAGCCATAGCTCCGTCTCCACAGTCCACC
AGGGACAGACTCTCAACAATGGCAGTCAACATGGCAGAAAGATACAGCAGTATGGTACATGAGGCCAGCCAAATGACAA
CTAAGACATTTTATCTCCTTCTTGACCTCATCACGTTCTTTGACTACTGTCATGCTGGGGCTGTAACAAAGGCTTTAGA
AGTAATGCAGGGAATAAAAATTCTACCTTTTACCACAGAAGATGTAGACCACAGAGTCAACAATTTTAAACACTACTCA
GATGAAATCAGACGCTGCCTTCCAGATATCTTGTTAGCAACTATGAACATTCTACTCAGCCAGTACAATAGCATAAGGA
ACCCAAGCTCACAGAGTCCTCTCAGGCGAAGGGGTGCCGAAGATGGAGGAAAAGATACATATTTAAACTACCTTCGCGG
CCAAGCAAGGGCTCTCATCATGTTTGCTGGGATGTTGCCGTATCGTCTCCCAGGCGATACGAATGCAAGACTTGTTCAG
ATTGATGTACTCATGAGCTGATGAGAAGGGTCATACATAAACACAAATGCAGATTTTGTTTTAAAAATTAACTGAATTC
ATTAACATAAAATAAGACACTGCTGTACATAAAATAATCAAACAAATTTGAACTCTAGAATGTTTTCTAACATTTGAAT
TCCTGTTTTGTTTTCAAATTAAACTTTGTTTATTCGTAAAAAAAAAAAAAAAAT
>00035 3 reads, 1181 bases
CAAACATGTCACGTGTCATTTATTTCTTCTTACAAACATTTTTGCCTTAATAACATTGTAGTTTTAGCAAAAATATCAG
ACATTTTAAATATCACTGCATGTTGGATCTGTCACACCACACAGATGTTAAGTACAGTTGTATGACTGGCAAATCCCAC
TTGAAATTTTTAGCAAYTCTTCCTCTAATTTCTTACAGTGATTTCATAATTCTACTTCCATTTACTCTAAGYACTCTAA
CCAAAAACAAAGTATCCTCCTCTTGTTCACAAAAGCTATCTTGTTATCTTTTGCCATTACTTCTTTACAAACGTCAAAC
TTCTAACCTGTCAAAACTTGTACTGTGCTAGCTGTATCTTTTTGTTAACACACATGTTCATACAGATCCCATATCAACT
AAATCACTACATACAATAGAGAGACTTTCCATACAAATCGCACACACTCTAAAGATATTTTCCAAACCACATATAATCA
TATCTGTTGAGAAACTTTGAACAGCCTAATACGTTATTCTGTACGCAGTACTTGAAGGTGAATGGGTTCATGTTATTCT
GCTCAGTGTACTTCTCTCGTTCCTCCCTCTTTCGCATGGATTCATGGGTGACAATCCGTGTCCGGAAAGGCAAACATTT
CTGCACTGCCTTCAAAACTCCAATCACTTCAATGAATTCACAGCGGCCACCGATCTCTAAGACTATCCTCTCKGCCCTG
ACAGGGAGGCAGTAGTGGTCTATTGCCCCTTTACCCCCACCCATCCGCTTGCCTTGACCTTTGCGGGTCACTGACTGCC
ACAAGTGGTTGAAACGCCACATGGCAAACATGTATCTGTCATCAAGCTGTTTGTTGAGGATCTGCCGCACAGCTTCTGT
GTCCTTCTGTTTTATTCTTCCTCCTGTCATAACCTGGATGCCATAGTCCCCATAGAGCAACTTGTTCTGAACCAGCTCA
GGGCCTCTCATCATGTGTAGGTCTCTCATCATTTTAGGTGGTCTAATATTGGTCTCAATGGGGGGGATCTTATCTATTA
TCTTTAGACGTCTCTTTTCTGGRAGAGCTGWCGTGGTCATAATTTGGAGGCGGTTTTAGCTTGAGTGACATACATGATG
ACAGAGAGAAACAGCATTGTGATTCTTAGTGATGCATGCAAAGGGATTAAAGACTCTAGCCTTCTCGCAGCACAT
>00036 10 reads, 1287 bases
CGGAGTCCCAATTTTAGTCCATCAGCATCTTCATCGTAGTCCTCATCCTCCCCCTCCTCATTTTCTTCGTCTTCATATT
CATCATTTTCAATAGCTTCTCCTGTAAAAAATAGGACTGCCCTGGGAACTATCCTTTCACGAATGAAATGGCCAATCTC
AAAGTCAGCACCTAATAAGGCCTCAACCTCCTCATCCATCTCAGACTCTGATCCCTCTGGAACTGCAGGTGGGTTGAAG
AAATTAAAGAAAGAGTCTGCCTGCACTTGCTTAGTCACAGTTCTAGTTAAACCTCGTCCTTTATGTTTCTGCTTCTTCT
TTATTTGTTTCACGGTAACATTTTTCCCCTTGTTCCAGTTGATAGTGCATCCAGTGCATTTGATGATTTCAGGCCCTTC
ATATGAAAAAGGATCTTGAGGATCAGGTTCATATCTCATTTCATAACGCTTGGTTAGTACTGTATCTGTGAAGTACTCA
TTGGGCTCAAAGTGAAACTCTAATGTGAAACCCACTGGGTCTTTATCATGAATAATAACTTGAATGTCTTGTAAATGCG
TCAAAATTGGTTCATCGTGCTCCTGTACCATCTCAGAGAGCAAGTCAACATTCTTGAAAATTGTCAGCCAAAAGCTTGG
GATACCCTTGACATCCTCTGGTTTCTTTTCCTCACTGTCCCCTCCTGCCTCTTTAGCGCCTTCAATACTTGCCATTTCC
TTAAGCTCTACCTGTTGAGAAGCGGGAGCCAGTTTTGCTTCTTCATCCTTTTCCTCTTCTTCCTCTTCTTCACTTGGCC
AATCACAGTCATCATCTGTAGGTTCTCGTGAAGCAGTCAGGATCTCTTTTCTCTTTTCAAATAATTCTGAGTACTTTGG
GGCATACTTAAGTTCAAGTGCATTAACTTCTTTGTAGAATTCTGCTTCCACTGATATAACTTCATTTTGTAGTTTTTTA
AGAGCTTTGATACGTCTTTTGACTTCTTTGGGTAAACTTTGAATGTAGCCTGAGGGTGATCCCACAATGGAGCAAAGTT
TATCCTGCAGTGCTGCTAAGACTCCAGGATTTTTCATTAGTTGATTTGCAATTGCTTGGCTGTCACCAACCTCGCCAGT
TTCTTCTGCATGATCATCTTCAACATCATCCACAGCATCACTGGAAGGGTTTTCTGCTTCTGACATCCTTACAGAGACT
TCAACTCTCAGAATGAAGGAAAATTTGGTTTATACTGATTTCCCCTTGCCTTTGTTATATACAGTGTAACTGTCGTGCG
CACGAGGAATATGGTATTACCCA
>00037 2 reads, 1159 bases
AAAAAAAAAAAAAAAAAAAAGTTTGGTWWSATTAATTTATTTGTGCTAGGTTTCCAGCCGACACAATTAAATGGACAAT
TTCGATACCAAGTAATCTGTGTATATGGCATACCTGGTCAAACAGTGTAATATTGTATAGTGGGGTGTTAACCTTGATT
GTTTCCACAATAACAATGGTGCCAGGCATTGTAACAGGTCAATGTAGTTAAAAATTTACACTGCATTAAAAGAAACAGA
TTAATAAACCATATTTGACCTTGAGGATAGGGTGAATGGAAAAAAAAANNNNNNNNNNAAGTGCAGGTTCACCAAAGAT
AAGAAGGGCTGCTGACTGATAAATCAGTCTAGAACAACATGACGGAATGGGTTGGACAAAATATTTGGCTTAGTAAAGC
TGCACAAGTTTTCTTTTTAGATCAATATAATATCCCTTATTTACAAATGGAACATCATTTACATAAACAAATGGAACTC
CTGAGGTAAGATAAAATAATGCCTTGAAGTTATTTGGGCAAGTTAACCTTAAATTTTAAAGTCAGTAAATTGTAAAATA
TACACAACTGCTGCACTCAATACTCTACTATTTTTCGATGTAGGTATTCACAAACATTTATTTTATCCTAAAATAAATG
TACATTAGATTATTAAAGGGACATTTGTTTCATCTCTAATCCAGCTGCTTTTTTTAAAGCTCTACCAGTGAGCAGGGTG
TAGTCACTATTCTGAAAGTACTGTGGTTCTCACCANNNNNNNNNACACTTCAGTCACAGCATATAGGGTCACAGTTGGA
AGATGGACGTCGATCCTCAAGATAACCGCATCTGTCCTCGGCAACCTGACGGGGTATCCTAATACTGGTTCCTCTATTG
GCCACTCCTGCAGAGAAATCGTGGATGCTTGAAGTCTCGTGGCGGCCAGTCAGGCGACGKTCGTTATCCTTGCCCTCAC
GTGGGTCGTAAGCTTTGATGTGGCGGACATGATGCTTGGAGAGCTTCTCAATGGCCTCCTCTATAGCTTTGATACCATT
AGGTTCCCTCATCTCCTTGGTGCTGTAGTTACAGTGAGCACCTGCTCCATTCCAGTCGCCCTCCATGGGCTTGGGGTCC
GAGGGTCACAATCACACCGAAATCCTCCGCCACACGATGCAGGATGTACCTGG
>00038 16 reads, 1353 bases
TTCCTTCATAAACTGTAGTAWWWGGACCTGGATGCAGACAAGTCAGAGTATTCTATTTATTTTAAGTTTGCATTCCAGC
TTAACCTGCTTCGTCCTGGGGGCACTGTGCTGGTAGATAATGCTTACAGGTATGGAGACGGCTACAACCCTGCAACAGG
TGAAAATGTCACAAAGAAATTTGTCAAGTCAGTTGTAGATGATCAATCATTACATTCACTGTTATAAAATGTCTGATAG
ACAACACATCCTTTCCTACTACGACCCGGCCGTCGCAAAGGTTGAGAAGGCTCTGAAGTTGGCTCAGTCGACTAAAGCT
TCCCCTGAGGTCATAAGAGCTCTCCAGTCAGCATGCGACTTGATACAGCAGAGAGAGCAGTTCACAAAGTCCAGCACCT
CGGAGGCCAGTGACGCATGTAAGAACATTCTGTCCGAGACGTACAGGCACGACTGGGCGGCCGCCCACCAACAGGGCAA
GACCAGCTGGTACCTCATGCCTCTGATGATGAGTGGACCTTTGGAAGGTCAATTTTTGAAGTCTATTGTAAGTATCCAG
AAAGCGAAACGAATCCTAGAAATTGGAATGTTTACAGGTTACAGTGCACTTTCAATGGCTGAAGCTTTGCCAGCTGATG
GTGAATTGGTAACTATTGATCAAGATGAGTATCTCAAGAGATTAGTTGAAGATAAATTGTTCAAACAGTCACCTCACAA
TAGAAAGATAAAATGTGTCATAGGCAAAGCACCTGAGATAATCAAGAAAATGTCTGAACGTGGGGAGCAGTTTGACATC
ATATTTCTGGATGCAGATCAGTCCAACTACCTGGAATATTTTAAGTATGCCTTTGAGAAGAATCTTCTAAGTCCTGGGG
GCTCAGTTCTCATAGACAATGCATACATGCAAGGGGATGGCTACATGTCAACAGCTGGAGAGAACAGCACAAAGCATTT
TGCCCAATGGTTGGCCTCAAACCATGACCTACATAAAGTTCTTGTACCATTACGAGATGGAATTTTGATGGTGCGTCGA
CTTTCAGATGTTGAGGGAGCAGTTTGATTGATATACGCGAGCTTTTGGCAGAGACAGTAGTAGCCACGGAGATATAGAG
CAAAGTACAACTGTTGAAATTAGCATTGTTGATGATGATGATGGTTACATATATATCAATATTTGCCCTTGTCAGTTCA
GCATGCTAACCAATATATTCATTACTGCTTTTAAAAAAGTATTTAGGTTTTATGTTAAATGTTTCTTTGTCGTATTCTC
ACAATGACTTGGGAGGACTATTCCATAACTTATGCCTAATTGCTTCAAAAAGCCACACTCTAGGGCAGTGCTTCTCAAA
GTGGTGGTCC
>00039 22 reads, 1344 bases
GCAAGACGGGCGAGGAAGAAWSWSWSWWWSCACCCTAAATGCTGTAGGCTGCCTTTAGTTTTCCCCATACTTGACACAA
CTACTTTGATATCTTCCATCCACTCATTTTTAGATTTTAAATCAGGAGCGGACAACTCATACTGCCTTTTTTGAGTGTG
TAGTTTAAATCTATGGTGTTTGCCCCCTGGTTTATCAGGAAAGCTTTGTGTGAAACAGTCTGATGATATAATAATGCTG
CCTTTCAGATCTTTTTCTTCTGCGTTAACAAAATATCTCAACTCTGTGGCTGTGAGGACAAACCATCTCTCCTTCCATG
CTGTGACCTTATTTCCAAATTTTACCATGTATCCCTTGCGCACAATGTCATATGTAATTTGATTAAAAACCTCAGCTAT
TCCATGACTGATGACTTGTGTATCATTGTCCTTCATAACTTTCTTCACAATGACCTTAACAAAGTCACTGAAGTCAAGC
AGGAATGACTGATGAATCACATCAACCGACCCCCTCCTCGGGGTAGGATTAACTTTAGGGGGAGGCAAACCGACAGCCT
GGCAAATGATTGTCGCTATCCGATCAGCCTCTTCGATGTCTGTTCTTAAAGGGAAGAGGAGGCTACCATCTTCTGCTCT
CTCAACCAAAAAGTTAAATATCTTCCAGATTTTGAAGCAGTCTTTACTGGGGAAAATTTTAGGACTCGGCTTCCCACCA
AAAACATCCATGGGCTCTTCTAGATCTTCTTCTTCAAGGTCGTCCCCATTTTCATGATTCTCCCCGTTGGGAACGTCTG
ACAGGATTCGTTGGCGATAAACATTCTCACACAGCATCCAGCACAAATTGTCTATCTCGGATATCAGAGTGGCCTGCCT
TGTCTCCGGGTGCTTGTCCAGCCCCACCAGCAGGTTGTTGTTCAACACAGTGATGAAGTGGTTGAAGTCTATGCTGTCT
TCAGGCACCTTGTCCCAGATTGTTTCAGCCTGTTCTACACTCAGAAGATGCCCCAGGTTGTTGGTCAGCACCCTTAATT
TTGTTTTCTGTACCAATGATGTTCTTATTTTCTTGATTTGAGATGTTGTATCAAGGACATCAAAGGCGTGCCACAAGCT
CTTCTTCACTTCTTCAGACTCCATTTTTTGGTAACTTGACTTCTAAGATGATAAGATCTTCTGTTGTCACGTTAAAACA
CAGGTTGTAAATTTGAAAATTAATATCGTTTGATTATTTAAGTCTTAAGAGCATGAAATTGTTTAAGATCCCAAAAATT
AAAACTTCACAACAGACGACACAGAGATTGTGAACATAGACTAATTAAATTTATCACATAAGCCTTCGATAGGCCTACA
C
>00040 15 reads, 1330 bases
AAAAAAACCTACATACAAGAWATAWTAWYRTACTCTATTTTTAACCTATTACTTAGACATGGATATTTTAGGGATTGGA
AGAGGGCCTTGGCCCATGGGTAGTCTACCCAACGCTGGGTCTTCTTCTTTAAGCTTTCCAGCCGCTTGATGAGCATGCA
GTAAGACCATAGGGGTGCTGGCAGTCTGGCTTTTAACATTCTTATGAAGCAATTTCCCTCTGTTGGCGTGTGCTAAATG
ATAAATTCTACGCATCTTTTCCTTGTTGGTTGAAATGTGTTCACCTGGTCTTGGGGTCAGTCCGAGGTCACCTAGCTTG
TAATGTGGTCGCAATATTTTTCCTTTAATTARACTGGCATCCAGTTTCACTTAGAGAAAGTTTTTCATCAAAATCATCC
ACGGGCATCTGTCTGTGGCCCACTGGTCGAATTCCAAGCTTCAATGAACTCTTGAGAATGATAATTAAATTTTGAAATA
TATCATTTTTTAGGTTTGTTATGTCAGTCGAATTCTTCTCGTCAAAAAAGCAGCCTGGTTCAGCTCGTTGCGACATGGA
CAAAACTAATTCTCGAATGTTTTCAACAGCATTTGAGAACATCATCTCCAGGTCCTCTCTGGGCTCCATGTCTGAGATT
GAGGCCAGCCGTCTGCTCAAATGTTGTTTTTTAAAGTTTTCGTTTATTTCCGCCAACCTTTTGATTTCCCGTCTTAAGT
AATTAGATTCCTCTCGAAGTTGGTCAAGTTCAATTTTCGTCTCCGTGGCTTTCAAATTATTGTTCTGTAACTGGTCGAT
TATAGCCTGCTGCTGTAGGCATCTCTGTCTCAAACCATTTAGTGTTTCATAACATTTCTGATAGCGTTTGGTCAGCTCC
TTCTCATTGGTCTCCAGCAACACAACTTTCTGCTCCAGCTTTGCCTTGGCAGCAAACTGCGCTTCGTTCTCTTCAATCA
GTTCCACTGTTTTGTCAGACATTTTGGCCAACTGGGTGCCGACCATGAGGTTCTCACTCAGCGTGCGCTTTATTGTCGA
GTTTAAGGTCTTGTCCGTCACTTTACGAAATTCCGTGGCCACGTTCTTTATTCTGACGATCATTTCAGCTTTCAACTTT
TCTTTGTTGCTGATTAATTTGCGCTCCATGGCTGTTAAATTGGCGCTGAATTCTTCATTCTTGTATGCCAGCTCTGTTT
CCATACGCTCCAGTTTGGACATCAATGAATCTCTCTGGAGTTGAAACTCTTCAAGTGCCGCAAGCTTTGAGCTTAATGT
GATATTTTCAGCCACAATTAGACTCTGGTGTTCATCGGCTTTCCTCCTTATACAAAAAAAAAAAAA
>00041 15 reads, 1356 bases
ATTGTAACTAGGACTTCAAGTATTCAAACAGAATACAGGAACAGCAGATACTAAATTTRRACYTGAACTGASKCCAAGA
AGTTGAGAAATGTCTTCAGTTACTTCAACAACCAGACTGTCCAGCAGAACTGGTAGGACTGCACTCTCACTTAGGTTCC
ACCATCTATCATAGTGATGTCTTCAGAGTTAGCATAGAAAAGCTATTGGAATTTCGAACAAGACTCCTTCAGAGAGGCT
TTGGCAATGTCAATACTATAAACATAGGAGGTGGCCTAGGAATTGATTATAAGTTCATGGAAAGTGAAACAAGGCCATG
GCGCTGTGATTCTGAGACCAACCGAGCACAGGTTATTAAATTTCGAGATTTACTGCTGACTGCCAAAGTTGAGGATGTA
AACAGTGAAGAACAGAAAAGTATGCATGAAATGACACAATCATTAGTGGCCTACATAGCAGAGAGTATTAGCTTTGGTG
ACCTAAAGGAAGCAATGAACACATTTTTTAAAAGATGCCCAAGTTGGTTGACAAAGCTAGAAGAGAGTTCTTTGACTGA
ATCACAGCCCAACCACGCCACACCCCATGATCTGATCAACTCAATAAAAGATTTACTCAATGATAATTCTTTGCTACTT
ATATTAGAACCAGGACGATCTTTAGTTGCCAACACAGGTGTTGTGGTTTCTCGTGTAATGGGATGCAAAAAGACAGCAC
AGAAATAGTTTGTTGTAATAGATGCAGCCATGACAGAAGTTATCCGACCTTGTCTGTATGGAGCCTACCACCATGTTAG
TGTTCTTAAAGACTTTGGATCAAGTCAAGTCAGCAAAACTGTCTGTGATGTCGTGGGTCCAGTCTGYGARTCCTCTGAC
TTCATAGCAAAGGACCGACTTCTTCCCTGCCCAGAGAATGGTCTGGTGGTCATTCATGATGTTGGTGCCTATTGCTACA
GCATGGCATCTAACTACAATATAAGGATGAGACCGGCTGAGGTCATGGTCAACGGTGAAAGATGTGACGTCATCAGACG
ACCAGACACATATGATGATTTTATGGCCCCTTACAGAATTTGAGACAGTAATTGAACACTTGTGACAACTGTGATTTAA
ATTTGCTATTATTCTAACATGATATGTCATTATGTGATTATTAAAATTGAAATGTCCATTGAATAGTTGAAAAAAATTC
ATGTCCAATATGCAAATTTGGGAAAATAAACAATAATGATTGAACATAAGGTTCATATATCTTGTTTACTTTGATTAGG
GCTTTGACTTGACCTTTCTTGAATGATGTTCACCTGTGTTAGTTCTGCTTGAACTCAGATTCCATAGACTGACAGTTAA
AACTATTATCAAA
>00042 4 reads, 1054 bases
TTTTTTTGATCTAGCTATCGTCCTCTTTTAGTTCAACAATARRRTRATCAATGTTACACGCTAACAGYGCCTTCTGCTA
CATGTATCCTGTAGATATTTATGTCAGCTCCTGGCCAATTTACTGCTTGTTCCACTGAAACCCACAAGACATTCTCATG
TGTCACAGTCAATGCGTGAGAAAAAATGGAGAGAGACATCGCGAAGCTGGCCAGCGGGAACAAAGTAAAACTCATTGGA
YATCATCCCGGCTGTTCTGTAGCAGACAGGTCAAAGTGACGTAACATCACCKCGGCTGGTCAGTTGCACGCMGGTCAAT
GTGACGTAACATCCCCCGGCTGGTCAGTAGAGGGAAGGTCAAAGTGACATAACATCACCCGGCTGGTCAGTAGAAGGAA
GGTCAAAGTGACACAATTTTCAAATGTTACAGTGAGAGACAATGATTCACGTGACCAGTGGGAAAGGTCAACAACGAAA
ATGACCTAACATCTCTGCCTGCCCATGGATGAAGGGGTGGATCAACAATGCCAAATACCCCACTCCGCGAATCAGTGCG
TCATGCCGGGCCAAGTTGACCCAACATGATCCCGATGGCCAGGGGACACCACCTAAAAACACCTAGCTGTTCTCTCTCA
CAGTTATTGTTCTTCTACTCGCATGTCCAGCTCAATTTTCCCATGATTCATTTATAATCATTTCGAAGTTGGCAACCAG
ACGCACGTCCTCAGGTTTCTGTGGCGACGATGAATAATTCAACACAATACTTTCATCAGAGGATATTTCAAACGGCAGA
TTTCATATCCACTTGTGCATGTCATTTGCATGACGCTGCGGGCCTTACGCTTTGTCATCCACCGTAGAACTTTCTGAAA
GTCTTCTCGACTTTTATTTTCTATGAAATTCCTAAGACGACATTAATGGGCTGGTATGAATGAAAACGGATTGATAGCA
TGTTGACTTACTGATGTGTGAGAAAGAGGAAACTCAGATGTTTAATGTCCTATTTATACTCACAACTAGTCTCATTTGT
TAGTATGGGAGTCTAAACTTGCTGGAA
>00043 5 reads, 1428 bases
CCCATTATGTCTACTTTGCASSCTGMCRSWGTGAACATAACACACACTTTACCTGACCTGTTGGATTATCGTGGATTAG
TTGTATCCGTGGATGAAAGGTGTTGAGGACCGTGTGAGTGTAAATTACCAGAAAAAAGTAGTGTCCTGTGGTACAGGAT
TTTTTTTAAAGCATAGATTGACATCGGACCTGCAAAAATGCCGCGTCCACATGTCAATGTTCGTGTCATCACCATGGAT
GCTGAGCTGGAGTTTGCCATCCAGCACAGTACAACTGGCAAACAGCTCTTTGACCAGGTGGTAAAGACAATTGGTTTGA
GAGAAATATGGTTTTTTGGTCTACAATACATAGATAGCAAGGGATATAGCACATGGCTGAAACTGAATAAAAAGGTGAT
GAGCCAAGATGTCAAGAAAGAGGTACCCCTTCAGTTTAAATTCCGCGCCAAATTCTTCCCTGAAGATGTTTCTGAAGAA
CTCATCCAAGATATTACACAGAAAATGTTCTTTCTGCAAGTGAAGGAGGGTATATTGTCAGATGAGATCTATTGTCCCC
CAGAAACAGCAGTTTTATTGGCATCATATGCCTGTCAGGCCAAGTATGGCGATCTTGCTGAAGATAATCCTAAACCAGG
TGCTTTAGCTAATGACAGGCTTCTCCCTCAAAGAGTTTATGATCAACACAAATTATCTAAGGAGCAGTGGGAGGAAAGA
ATAAAAAGTTGGTATGCTGAACATAAAGCTATGTTGAGGGAAGATGCAATGATAGAGTATCTGAAAATCGCCCAAGATT
TAGAAATGTACGGTGTGAATTATTTTGAAATCAAGAACAAAAAAGGATCAGAATTGGTTCTAGGTGTGGATGCATTGGG
TCTTAATGTCTATGAGAAGGATGATAAATTAACACCAAGGATAGGCTTCCCCTGGAGTGAGATTAGGAATATTTCTTTC
AATGATAAAAAGTTTGTCATAAAGCCAATAGATAAAAAGGCTCCAGACTTTGTCTTCTATGCTCCTCGTCTTCGCATCA
ACAAACGTATTTTAGCTTTGTGTATGGGTAATCATGAGCTTTACATGAGACGTAGAAAACCTGACACCATTGAGGTTCA
GCAAATGAAAGCACAGGCTAGAGAGGATAAGCTTTCTAAGCAGCAGGAAAGAGCACAGTTACATCGTATGAGACAGGAA
CGTGAAGAGTCAGACAAATTGAGAAAAGACCTGGAAGATAAAGTCAAAATCATGGAAGAAGAGCAAAAGAAAAGAATGA
AAGAATTAGAGGACATGCAGTCCATGATTCGAGACAGAGATGCAAAGGTGGCAGAATTGACTAGACTTAGAGATGAGCT
TGATGAAGAAAGGCGACGGGCAGAAGAACTTCAACGAGAGATTGAGAGGTCTCACGAGATGGAACAGTCTGAACGTGAA
CGACTG
>00044 12 reads, 1431 bases
AAAWATTTACAAATTTAGAATATATGTASATCTTTTACTATAATATGCTTTGTTATAAGATGATATGGATTAAGCTGCT
CGTATCATATCGTATGCTTTCATTCGCTGTTCCCTTCCCGACTCCCACCCCAAGAGCTCTTTAGCAGGGAGAATTTTCT
TCATGAGTTCCCTCATAAGATCGTCACAGTCCCCAAAGACTCGCGAGCCAAGTTGTCTCCCATCTGGTCCCACCCTGGT
ACAGATTTCATCATAGTGGGTGACTTGTCTGTTGCAAATAATAAGCTGGTGTGGTTCTGGGCCTTTAGTGACCAGATAG
TGGGCAGGGGAGACCATCAATGTTGAGCCAAGAACTAACACTGCATCAGCCTTCTCAGCCTCCCTCTCAGCTTTCTCCA
GTACCTGAGGCTCCAGGTGATCGCCGAAGTTGATGATGGTGTTCATCAGGTAACCATCACATCCAGTTTTGGAACACTT
TCGTCCAGTCCTGTGGTCAAGCTTACACTGTGGACATTGCTTTGGGGGGCAGTTTTCAGACTGCCTCCTCCTGACTCCA
AAACTCCTTTCATATCGTGTGTCACAGTTTTCACACTTTTCAACAAATGAGTTCCCATGCAACTCTGCGAGATTATCTG
GTGGTATCCCCGACAAGCAGTGGAGTCCATCTGTATTTTGACTGATGATGAATTTAAGCAGGCCAATCTCCAGCAATTT
ACACAAAGCCTCATGGGTGTATGTTGGTCGGAGCTCTGAGAGATTTTTCTTACGGCTGGTCATTTTTCCTGCGTCTGTG
CCAAAATTTTTTTTCTTGTCCTGATTGGTCCATTTGCCATTTTTTCCTCTGAAGTCTCCAATGCCAGCAGCTGTTGAAA
TACCAGCTCCTGTGAAAGCGATACAGTTGTGACTGATTTTCAGGATCTCTGCAATACGATCAGCTTCATAACAAATCTT
GGCATCTGAATCAAACAATTCGGCAGTCTTTCTCGCCTCGAGTATCATGGTCCTCTCCAGATCAGACAACTGAAATTGA
CTTGGTCTGTATGCATCTACAGCTGACTTCAACAGAGCATCCCAGCAGGAGTAGTGAAAGTTAGCAGCGCCACCTTCCT
TCCAATCAACTAACATGTTTTGGTTTTTAGATTTAGGCTCAAATGACTTGACTTCTACTCTTGAATCCTGACTATTTAT
TGGTGCTTGTTTTAAACATTTCTTTAGTCCACATTGGTTTTCTGTAACTGTAGGACTTGATTGGACTTGACTGCTAGCC
ATTTTTCAAATTTGAATAATTGTGTTCTCTGCAGATTTCTTTACATTGTAACCTAATTCTTTTTTCTTCTTAAAAAGGA
TGCGAGAATCAGCTTCCTGACCATCTCTGAACGCTAGTCATTGCATGTGTAGTTGGCATTTGGGCAGACCGAGTCTTTT
TTATTACCC
>00045 10 reads, 1558 bases
ASGKWTGTAGYTRCGAGAAGGCTAGATTAATTATCCCGTAGTCGTAGTCAAGTCTGTTCATTACAGTTCATAATTCAAA
GACCTTTCCAGTACAAAAATGGATTACGCCAAAATGAGAACAGCTGAAAACTTTGGGACATTTTTGACTGAAAATAAAA
CAGGGGATCAAGACTTTGAATTGGTTAGGTCTGAATGTTCAATTGAAAGCAAAGACAAATTCGTGGTACGCGACCGAAA
CTTCAATCGTCAGTACGCCCATTTGTATGCAGAGAGGTTAATGACTATGAGGAGCCGCCTATCAGAAGCAGCTGTAAAA
AAATGGGGCAAAGATATTCCTCATCGTAAACTACATGGTCTTAACAGTGATGAGCGGTGTATAGTTATAGGTACCTTGT
TCAAACACATGGAGTTGCAACCAAATATCTTAAAAGAAGTCAGCGAAGAGCACAATTTAATGCCCCAACCAATTAAGAG
TCGATACACAGATTCTAATGACAAACTGATTATAGAGGATGAGCTGCAGCGAATTATTTTAGTTGGAGAGCTTAAATGT
CAGACTTCAGTAACAGGGGTCATTGCTGCAGTTTTAGGAATGGAGCCAGAGGATCAAAAGGGAAAGTTTTATGTTGAAG
ACTACTGCTTCCAGGAGTTGCCAGCACAAATACCCAGACCAATAAAAGAAGAAGAAAAATTTATATTGTTTGTAAGTAG
TTTTGAGTTAGGAGGTCAGGAGGAACGGTCTTTTCAGATGCAAATGTTAGCAGATCTTGTAAGTGGGCAGCTGGGAGAT
CCTGATCAGTTGAAGGCATCCTCTGCTATATGTCATGTAATCATTGCTGGTAACTGTCTCAGCCGGTCCACTCAAGACA
GAGATTCTTTAAGTAAAGCAAAATATTTATCAAAAAAGTCGTCAGCTGGAAGTGTAGATGCCATCCGCTCTCTGGATAG
TTTTCTTATGGAACTTGTGACTAGTGTTGATGTCACTGTGATGCCTGGTGAATATGACCCTTCAAATTTCACACTACCA
CAGCAACCTCTTCACCCCTGTATGTTACCTCAGTCATCACGGTACAAGACTCTGCATTGTCAGACTAATCCTTGTGACA
TCACTGTTGAAGGGATAAGGATTTTGGGATCATCTGGACAACCAATTGATGACATTTTACGCTACAGCGAAATTGATAA
TTCTTTGGATGCTTTAGAAAGCACTCTTGTTTGGGGACATTTGGCTCCCACAGCACCCGATACATTAGGTTGTTATCCC
TTTGTGAAAGATGACCCTTTTATATTATCAGAATGCCCACATATTTATTTTGCTGGTTGTCAGAAAGAGTTCAGTAGAA
AAATTTTCAAAGGGCCTTGCAATCAGGAAGTCCTCTTGCTCACCATACCTAGGTTCTGTCAAGCTGGAGCAGCTGTTTT
AGTAAGCCTGAAAACCCTTGATGCTCAAACTATCAGTTTCTATGGTCATTTCCCCATTGATGAACAAATGGACCCTGAA
ATGGACAATTGATGCTATTTTAATATTATTTGTTATTCAATGAATTTAACCAACTAA
>00046 3 reads, 1422 bases
AGTTTTATCGTGAACGTGGACCATAAGTAATTTTTTCTATACAATTTTCTTTTGTCTCCAAATGTACTTGTATTTCTCA
AACCAAGTGAGCTCCAGAGGAATTGTTTATTAAGCATATTATGTGGCTAAATGTAATAAAATGAACTAATATTAAATAA
GATTTTTAAAAAACAAACATTAAAGTTATTTAGAAATAATTAAAAACATTATTTTCCTTCCGTCCAATAACAGAAAGCC
AATTTATTCTTTTGAATACTGCTGGACAAAAATTGACCCAATTACTTTTGGACAGCTTGATAAATTTTTAAGTCAACAT
GGGATTTAAGYACAGACATTACACAGCAGATTTGAGGAAGTCCCTGACAGGTGTCAGCTCCCTGTCCAACCACTTGGCA
TTGAGTCTGATGTTCTCAATGCTCTGTTGAACAGTTCTTTCAGCAGCTGGGACTGGGTTCTCTTTGAAGAAAGTTTCAA
TTTCCTTGGCTTTCTCTTCAGTGACAAATGATTCAGTGGTAGACTGCACCAATCTAGATAACAGAAAGCCCCCTTCATA
ACGATCATTTAAAACTTTAAACTGAGATTTAAAAAACTCCCAGGCTAACTCTCTGCCCACAACAGATCCTGTAGTGCCA
GCAATAACAAACACTGCATCTTGAGACCTGACTTTGCTTGATAGAGAAAAGTCCAAAACAGCTTGAATGAGATCTTTAG
ACTGAACAGATCCCAGCGCTCTGCTGATACGAACCTTTTCCTCCTGCATCTCTGCAGCATCATAGAGCTTTAGCATCTT
GTCGTATGTTTCACTGTCCCCATTGTGAAGAACGGTGGTGTACACACATGCACGAAGATCTGCAGGCAATTTGGCTGTT
CCGTCAACGTGGGCCTCAAATCTCTTTTTGGCCTCTGCTATGGTTGCCTCATCCCCACACCTGCCCATTCTAGTTAGCA
CAACCTCTCTCAACATGGGAATAAGGGTGTCCTCCCCAGGCTTAGCATCCCATCCAACTGTGGCTGCAATCTTACTGAA
CAATTTTTTGACAAACTGTTTGTAAGCTGGATATGTGTCATCAGCATACTGGAGGATGGTACTGATGGTGGATATATTG
GATGAAAGATTGGACCAAACTGTGTAATCTTTCTCATTTTCAAAAGCTTGGGCAACTTTCAGTGCGTCTACAGCAGAAC
TCATACCAGCACGGGACAGTGCAAATAGGTCAGACTGCAGACCAAGTCTGTCTTTTGGTGGAAGACTCAGATTTTTGAC
AGCAGGAATCAGGGCATCCAACATCTCAGTAGGGTACATAACTCTGTATACACCTACTGTCCCAGCATTCAACTTGACC
CAGTCTCCCTCTTCTACATTTGGCACCACAAACTCCTTAGACTCAGTCTCCAACAGTCCCAGCACGTCAGGCTTGTCAG
>00047 3 reads, 1340 bases
TTATCACAACCGACAGTTGATATCAACACAACAGCCAATCAAATCTATCAACATAATTTCCCAGGTGTACCCTTGCAAA
GCTTGGGTATAGAGAAACTTAGCTTGAAGCTGTTGGAATCCCTTTCTATAAATGCAATACTCATGAGCCCTCCTTGTCA
ACCTTTCACCAGAGTTGGAAAGAAAGGTGACTGCAATGACATACGAACCAAATCATTTCTTCACATCTTGGGACTTATA
TCACAAATGATCAATAAGCCAGATTATATTCTGGTGGAAAATGTGAAAGGATTTGAAACATCTCAGACTCGTGAGAAAC
TTGTGGACTGCTTGAGAGCTTGTGACTATAGCTACCAAGAATTTCTACTCACACCTCTACAATTTGGTGTACCAAACTG
TCGACTGCGTTATTACTTGATTGCAAAGTTAAAGCAAAGATTTGCTTTTCCTGTCCATTCTCAGATTTTAAACCATTTG
CCAAGCATTGATGATTTTAATTTGGAGTCAAAACATCATGTAACACATCCTAAGTGTCACCCTGACACACGCAACAACA
TCAGTGAACATGAGTGTGAACAACTGAGTCATTGTGAAGACACTGAACATTCCCCAAACATCGTTTCTACATCTGAACC
TTCTGACGCCAGCACCAGACTAGACACGAATGAGCGTAAAAATGGCAGAAGTTTTTTAGGAAATGAGCCTGTTCTAGAA
AATGTTGATAGTTCTCTTGGCAAGCTTGTGGGTGAAAGCATGACATCATATTGGGCAAACAACCAGACACAGCATGTGG
ATCTTAAAGATGCTGGTCGCAACATGAGATATTGTGAGGAAGATGATGATTTCATTACAGACTCAAGTCGTTGTTTATC
TGAATACATGGAGGATGGTGTGGACTTCTCTGAGTATTGGCTCTCTGATAAGGAGCTTAGAATGTTTGTAATCATGGAT
ATAGTCTATCCAGACTTGAAGAAGTCAATCTGTTTCACTAAAAGATATGGCCATTATGTGGAAGGTGCTGGGTCCGTGG
TACAAATGTCTTCCAACATTGAGCATGTGAAAGCTGCCAGTGAGCTGAAGTCACTTGCTGTCAGTTGTAAAAATCGTCA
TGAATGGGGAGAGMRWMGWGATGGAGATATTAAGAAAACTGAAGTTAAGATATTTCACACCAAGAGAAGTAACTAACCT
TCTGTGCTTTCCCAAGGATTTCAATTTCCCATTGGCCTTAACCAAAGTACAGAAATACAGAGTTTTGGGAAACAGTTTG
AATGTTCTTGTGGTGGCCAAACTAATAAGATTAATGACTTTTCATCAAGGATCCTGACATGCCAGTTTGACCGCCC
>00048 22 reads, 1306 bases
AAAAAAAAAAAAAAAAAGTTGATGTWATRYATTTGTATTCCTCTCAAATATCGTAGCGATGCACGGGTACTCGGACAGT
TTTTAATATATAATATCATTAACACAGTGAGAAATGCTGCTTTGAGACGAATTAAATGTTGGTCTCGCTGATGAGTTTG
CGCCGTTGATTTGACGTTGTCAGTGCCAGTGAAGTGCCATGGTTTGTTGAYTCATGTTATCCCATRGAATATAATCGTA
MACAACAGTGTAGACGCCCGGCTGKTTTGGAATGGCACATAGAACACCCCATGACGTGATGCCCTGAATCTCCCAATGT
TTGTCCTGTGATGCAGATTCACACATCAAGGGGCCGCCCGAGTCACCGTCACATGAGTCAACTCCACCCTCCGGGAATC
CTGCGCACACCATGTGGTCCATAAGCCGGTCCCCGTAATAGTCCTGTCCACCGCACACGCTGTTCTTGATGATGGGTAC
AGCAGCTTGTTTGAGTTTGTTGGTACAGCATGTGCCCAGGGTGTTTCCCCATCCTATGATGTAGCAAGTTGTTTCCTCG
GGGACCTTGCGTTGTGGGAGACACGCCGTGCTGACGTAATCGGTGACGTTAAAGGGTTCCCTCAGTTTGATCAAGGCCA
CGTCATTCAGTGACGTGCTGCTGACGTACTCTCGGTGCATGTAGACGTCATACACCGCCCGCTGCTGTTCGTACTTGTC
CGGAATGTGGAGCTGGTGTCTGCCTGCTATAACGATGAACTCCTCGTAGTTTCGGTTGAACACGGTTTCAAAGCAGTGA
GCAGCCGTCACAGCCCACTGCGGATGTATCAAGGTGGCCCCACACAGGTGGCCCTGCTTGTCCGTGATGGAAAGTATCC
AGGGCCACGCGCCCTCGGGGGACTCGCTGCCTCCAACGATTCTCGTGTCTTGCAGACGTACGAGTGGCCGACCGCACTG
TGTGGAATAGCACATAGCCTCGTCACTGCCATCACCACAATCGTTGACGCCGTCACAGACCACCGACAAGTTTACACAA
CCACGGCCACCACACTTGAACTCATCAGCGGCACATCTCTCTGTAGGATAACTTTGTGTAAACGATAGGTTGAAACCGT
AAGCACCATATTGGGCGTCACTGTGAAATTTTAGAATCGTCCTAGAGGTGGCCGCCTCAATGTCATATGGTAACATAAT
ACCACACAATGATGCAATCTGAGTCAGATTCGATGCCAGGGTTTCATTTTCAGTGTCGATGGGACTTGATTCATTCGTC
TGACTGACATTGAAAACTTCATTAGAAATGTTTAAGTCCAAG
>00049 20 reads, 1189 bases
ACCACCCTGACCACACAGCATCTTCTTTTTTAATGTAAATAACAAATTGGAAGTTGTTCAATGAAACAATCTTAGACCC
CAAGACGTGTAGTGGTGTATGATAGTGTATCGACATACTTTGTAACTAACTTTTGAYACATTTAAGAACAACACACTTA
AGACCGTGTGCTACGTTTCACATTGACATTGATTGTGACTATGTGACATCGAAAACGAAACTAGGCCAAGATTAGAGTT
TTAGAAACAAAACGATAGCAACAGCTGACACACACTGTGCACTACACACTACAAGCCTTGGCTACACATCTACAAGCCT
TGACTACAGTATGGACCCAGACGAACGTGAGATACAACATCAAGCCAAACAACTGCGTGAATTGTTTAAAGGACGGTTC
ACTCAAAATGAGTTGGTGATGGTCATTAAAGAATTTGGAGGAAAACTTCCWGCCCTTGACTTTATCATCAGAGAGGACC
CTGGAGTTGTTAGTCAGTTTCTCAAAAAGAATAAACATTACATAGAAACTTTGCAACAAGATTCAAAGAACCTCGCTAA
ATGTCTGGAAGATGGTATCAACATAGAGTCCAGCAAGCGACAGTTTGCGTGCAGAAAATGTGAGAGAAGCTGGTGGAAG
GTTGTTCCTATTCGAAAAGAGATCAGCAAATGTCGTGTTTGTGAGGTCAAATTCGACCCCATTCCAAGAGACAAGGAAT
GGGGTATCGGAGTATTTTATTGCTTAGGGGAAAACTGTGGCAAAGAATTCAAAGGCTTTGCCGTAATGGGTATGACAGA
GAGTATGTGTAACAGATGTGGATTTGACTCACCAGTTGATCACATTTTACCACCAAGGAAACGAACTGGTGAAGAAAGA
CGAACTCGAGATACTCACGGCTGTAATGGTATCAACTGTTATAATGGATCAAGAAATCCAAATAGGGGGAAGTATAATT
ATTGGCAAAACTCCAAACCAGCTGTTTGCATCCACCCAAAATCCAAAGACCAGAGGCCACATGATATAAGGTTTAGAAC
CTGGAGTGCAGTCCACCGTTCTACGGGGTCAACTGTTTCAACATTCCTTGACCAGCACAGCATTGATACAGGCTCAGGA
AGTTTTGCTTACACTATGGAGACTATGAGTATTTCTGGACATTCAATGAGGAACTAACAGAAGTATTTTTTWTTTAAAA
TTTT
>00050 19 reads, 1319 bases
TAATATCCGATCCCTATTATCCCCTTATAWTGTGACCTTGTGGCCTAAAAAACCTCTAACAAAGTTCGCTTTCGATAGA
ACTACCTTTTGTCAACCTGCACTGACTTATTGGCTGCCTCCACATAGCATTTGAAAATACAGTAAATATTAAACAATCA
AAATGCAGTCATATTTAAGGATTACCTCTCAGAGTGTTAAGTCTTTGTTGATGAGTCGATCCTATGCTTCAGTATCAGG
TTTGAAAGAAGTAGTTATTGTCAGTGCGGTTCGAACTCCCATAGGATCATTTCTTGGGTCTTTGTCATCAGTCCCTGCC
ACAAAGCTTGGAGCTGCAGCAATAAGTGCAGCAGTTCAAAAAGCAGGGATTTCACCCGAGGCTGTGAATGAGGTGTACA
TGGGAAATGTCCTTCAGGGCAGACAAGGTCAAGCCCCAAGCAGACAAGCAACTCTTGGTGCTGGTCTTCCGATTACAAC
CCCAACAACTACAATCAACAAAGTTTGTGCCTCTGGTATGAAAGCCATTATGCTGGCATCACAAAACCTCATGTGTGGT
CACCAGGAAGTTATGGTGGCTGGAGGTATGGAGAGTATGTCAAATGTTCCATTTTATCTCAAGAGAGGCAATCTACCAT
ATGGTGGGATCAATCTAGAAGATGGTGTTGTGTTTGATGGACTGACAGATGCATACAACAAATGTCATATGGGCAATTG
TGCTGAAAACACGGCAAAGAAATACAAAATCAGCAGAGAAGAACAGGATGAGTTTGCTATTAGAAGTTACACACTTAGT
CAAAAGTCAGCTGCTAGTGGAGTCTTTGCTTCAGAAATCATTCCAGTGGAGGTTCCCCAAAGAAAAGGTGATCCCATTA
TAGTAACAGAGGACGAGGAATATAAGAAAACTGACTTCAGCAAATTTAAGAACCTCAAACCTGTCTTCCAAAAAGAAAA
TGGCACAGTGACAGCTGCCAATGCCAGCACATTGAATGATGGAGCTGCTGCACTTGTTCTGATGACAGCAGAAGCTGCC
AAGAAATATGGGGCCAAACCCTTAGCAAGAGTTGTCAGCTTTTCTGATGCAGCTATTGATCCAATAGATTTTCCTACCG
CTCCAGCATATGCAATTCCAAAGCTATTCGAGAAAAGTGGTGTAAAGAAAGATGATGTTGCATTGTGGGAAATCAATGA
GGCCTTCAGTGTTGTTGTATTAGCCAATGTTGAATTGCTTAAAATAGACATCAACAGAGTGAATGTTCATGGTGGGGCA
GTCAGCATTTGACATCCTANNNNNNNNNNNNNNNNNCGCATCACTGGCCATTTAT
>00051 3 reads, 1272 bases
AAGGCTAGACCCATTASSWWAACTCACGCTTCCGATTCAGAAGCAGAGGGAACAATAATAATAAAAATGAATGTTCCTG
TCTTTATCGATATCGCGGTCCCGCTACAGACTCTGGAGCTTAGAACATTTCTAAAAGCTTTAGGGGCTGAAATTTCTGA
AGAAAATGCAGAATCCGGCTTATTAACTGACTTGAAGAATATTATTGAAGCAAGCAAATTTTGCTGGAATCTAAATAAT
GAAGCAGATATCGAAATGGTCTTCAATGGCATCATTTCACTACTACTGGTAGTACCAGTGCAAGAGGCAGAAAGCGTTG
TCACATTGTTTTGTGAAAAAGTGGGAAAGTTGCCAGAAGGTGATAAACGAGTACCCCTGAGGCTGCGAATGTTGAGCAA
CTTGTTTTATGGACTAGAGGAAGAGGCAAGCCTGCGCTATGTTGTGTTGTGCAGTATGGTGCGTCTGGCTGGCCAGAAT
GATCAACTTTCGTGGGTACCAGTTGACTTGGAAAAAAATCAAAAGGTGGATCAGTTTATGGGAGATCAGCTCAGCCAAA
GTTCAGATGCTGTACCGCACACTCCATGAGTCACTCACAGCATGCAACATGCGTGAGATTGCAACTAAGGTCATGATTG
AACTGCTTGGTACATACACCGAAGATAATGCATCACAAGCTCGAGATGATGCTCACAAATGCATAGTGACCTGCGTTGC
TGACCCCAACACATTTCTAATGGATCACTTACTGTCTTTAAAGCCAGTCAAATTTTTGGAAGGGGAGCTTATTCATGAT
CTTCTGACCATTTTTGTGTCAGGTAAACTAACACAATACCAACAGTTTTACAAAAATCACACAGATTTCATCAATTCTC
TTGGGCCATCACATGAGGAAAATCTTCGCAAAATGAGGCTTTTAACATTCATGCAAATGTGTGAAAACCGAAAAGAAAT
GGACTTTAGCGTTATACAAGAGGAGATGCAGTTGGATAAAGATCAAGTTGAGGAGTTTGTCATTGATGTTTTAAAAACT
AAAGCAGTGAAAGCCAGGATAGATCAGATCCAGGAAAAAGTTATAGTTAGTTCAACAACATTTAGAACATTCAGCAAAC
ATCATTGGCAGGTAAATTCGTCAGCATTTGTCCACCTGGCAAAATAACTTGGCACGTTTGGAGGTCAACTTTGAGAATG
TGTCCCTCATTCAGTCACAAGTGCAACAATAGAAGAAAAAATTATTTATGCTTGGATTAGAATTAAGGAGATCTTGGRR
GATCTGAA
>00052 8 reads, 1295 bases
TGTGTCAATGTTGTGGTGTTATCGTAATGTATACCACCACAATAACATGATACCACCATAATAACATTACACACAGTCA
CAACACCACAATAACTGCACCCCAAAAACTGAAAACAAGCTGTAAGTCTGTTTGTGACTAGACAACTTTGCTGCGCTGT
TGATGGACTGACTAACTGATCTTTGTCTGACGTAAGTTTTTGTCCAAGAATTGAAGAATTCTGGGCCAACTGTCCTCCT
GGGCGAAGGCGTGTTGTTTATCATTACCTCCCCACAGCATGTTCATTTTGAAGATTTTGTTATAACTTGTCCCACATCT
GGGTGCAAATGGCAGCTCTAGCAGATGGCCAGCCCCAGGGTAGGTTATCCACGTAAAATTATTTTTGAACTCATCAGGT
ATATTCTTCTTATAGGCATCAAGAACTATTGGATTTACACACTGGTCATCCAATCCGTGGAGGGCAAAAATCTTTGCCC
CATGTTGCCATCCAGGGCAGGAAGGGACGATATCCCCAGGCAAAAGCATATCTCTGAAGACGACCGACCCATCCACATA
TTTGACACGATCAAATTTAAAACTGGATATTTCTGCTTCTTTTCCTTCCACTAGTTGTGTTCGAGCAATAGGAAGCCCT
GTACCATTGACAGTCACTAAACATTTCATAGCAGGTCTCCTGGATGCAATAAATTGGAGGTAACCACCACCAACACAGA
TAGCCACACCCCCAAGCTTGTTAGGATCAACTGATGGATGGGATGCCAGCCAATCAAATGCTCTCAGAAAGTAGTGCAA
GTCCACCTCGAGTTCATTCTTGGGAAGTCCAGGGAGACCAACATAACCAAGCACAAAAGAAGCGAAGCCATGAGATGCC
AGCAAAGCAGACCTGAACTCAATTATCCCACCAGTAAGGCCAAACAGGTCAATCACTGCTGGGAATGGCCCATTGCCTG
GTGGTGTGAACAAAGTTCCTTGAAGACCATTCTCTCTAACTGGGAACCTTTGAACTCCAGGGGCAACATACGACCGCTG
TAGCTGACACGATGTAAGACAAGGGATATTATCTGACCAAGGGAGACTGTTAAAGTCCTTGAAGTCGTCATGTACAGCT
ATGGTCACATCATATGGGGTCATAACATCTGCTTTAATCAGTCGGCCAGGTTTAACTCCAGGGGTTACACTGGCGCTCC
AGAACAATCCCATTGGATCTAGACCAGTAAATGTTCCCCCCTGAGACGGATCTCTACAAGTCTCCACTGTCCCTTTCTG
GTCAGCTGTGAAGTGAGCACATGATCCAAAA
>00053 4 reads, 1279 bases
AGAACTTGGACCATGATACCTGTCACAAGCTTCAGGTCCTTTTGGTCAACTATTTCGGCCAGACAATTTTGTATTTGGT
CAGTCAGGTGCAGGTAACAATTGGGCAAAGGGTCACTACACAGAAGGTGCTGAGCTGGTAGATGCAGTCTTAGATGTTG
TCCGTAAAGAAGCTGAAGGGTGTGACTGCTTACAAGGTTTTCAACTCACTCATTCGCTTGGTGGTGGAACTGGTTCTGG
AATGGGGACACTACTTATTAGCAAGATTCGTGAGGAGTATCCTGATAGAATCATGGTCACATTCTCTGTTGTACCATCA
CCTAAAGTATCTGATACAGTTGTGGAACCTTACAATGCTACTCTGTCAGTTCACCAGCTTGTAGAAAACACAGATGAAA
CCTACTGTATTGACAATGAAGCACTTTATGACATTTGTTTTAGAACTCTAAAGCTGACAACACCAACCTATGGAGATCT
GAATCATTTAGTTAGCGCAACCATGTCAGGTGTAACAACTTGTCTCAGGTTCCCAGGACAGTTAAATGCAGACTTGAGA
AAATTGGCAGTCAATATGGTACCATTCCCTCGTCTTCACTTCTTCATGCCTGGGTTTGCCCCTCTTACTTCTCGAGGTA
GCCAGCAGTACAGAGCCCTCACTGTGCCTGAGCTCACTCAACAGATGTTTGATGCTAAGAATATGATGGCTGCCTGTGA
CCCACGACATGGACGCTACCTTACTGTTGCAGCAATATTCCGTGGTCGTATGTCCATGAAGGAGGTGGATGAGCAAATG
CTAAATGTCCAAAATAAAAACTCATCTTACTTCGTGGAATGGATTCCTAACAATGTCAAGACTGCTGTCTGTGACATTC
CTCCAAGGGGCCTTAAGATGTCTGCAACTTTCATTGGTAACACTACTGCAATACAAGAACTGTTCAAGCGAATTTCAGA
ACAATTTACAGCTATGTTTCGCCGCAAAGCTTTTCTTCATTGGTATACTGGGGAAGGTATGGATGAAATGGAATTCACC
GAAGCAGAATCAAATATGAATGATTTGATTTCTGAATATCAACAATATCAAGATGCCACAGCAGAAGATGAAGGAGAAT
TTGAAGATGGAGAAGAAGACGAAGGACAGCTGAACGAATAAACTAGGAGACGAAGGACAGCTGAATGAATAAACTGGGA
GTTAAATTTTTAAATAATGATTTTAAGTAAAAGTACAAGTACTTATTTTTTATAAAAAAATACTGAATCTCATTTTTAT
TAGAGTTTTTGTGCG
>00054 7 reads, 1497 bases
CCTTTAGGTTGTCAGCTTCAASTWGATCTTACAACAGACAAAGGATTGTTTCGGGCTGCTGTGCCCAGCGGTGCTTCAA
CTGGCATCTATGAGGCTGTTGAGCTCAGAGATGGAGGGAAAGACTACCTAGGAAAAGGTGTTTTAAAAGCAGTTGGCCA
TGTAAACAAAGAAATAGCTCAAGCTTTGCTGAAAGCTCAACCTGACTTAAAAGATCAACGAGCTGTCGATAACATACTG
ATTGCTTTAGACAACACTGAAAACAAAGGTAATTTGGGAGCTAATGCCATTCTTGGGGTATCAATGGCAGTCTGTAGAG
CAGCAGCAGCTGAAAAGGGCGTCCCACTCTACCGCCATATTGCAGATATTGCAGGGACAAAAGAATTGTTTCTCCCCTG
CCCAGCCTTCAATGTCATCAATGGTGGAAGTCATGCTGGCAACAAACTTGCCATGCAGGAGTTTATGCTACTCCCTACA
GGTGCCAGCTCCTTTGCGGATGCCATGCGAATAGGATCAGAAGTGTACCACAACTTGAAGGCAGTAATCAAGAAAAAAT
ATGGACAAGATGCTTGCAATGTTGGTGATGAAGGAGGATTCGCTCCCAATATTCAAGATAATTCTGAAGGCCTTGAGCT
TTTGAAGGAAGCTATTGAAAAGGCTGGTTACACTGGAAAAGTTGAGATTGGAATGGATGTTGCTGCTTCAGAGTTTCAC
AAAGATGGAAAATATGACTTGGACTTTAAGAACAAAGACTCAGATCCTTCCAAATGGTTAACATCTGATCAGCTTGGGG
AAGTTTACAAAGGCTTTGTAAAAAACTACCCTGTAGTTAGCATTGAGGATCCATTTGACCAAGATGACTGGGGTGCCTG
GACAAAAATCACATCTGAAATTGGAATCCAAATTGTTGGAGATGATCTGCTAGTAACTAATCCCAAAAGAGTTCAAAAG
GGCATTGAAGTAAAAGGCTGCAATGCTCTMCTTCTAAAAGTCAATCAGATTGGAACAGTAACAGAAGCTATCGATGCCT
GCAAGATGTCTCAGACAGCTGGATGGGGTGTCATGGTCTCCCACAGAAGTGGTGAGACAGAAGACACATTCATTGCAGA
TTTGGTGGTTGGATTGTCCACTGGACAGATTAAAACTGGAGCTCCATGTAGATCTGAGAGATTAGCCAAATATAATCAA
CTTTTAAGAATTGAAGAGGAGCTTGGCGCCACTGCTAAATTTGCTGGCAAGAATTTCAAGAATCCCAAGTAATTTTTTC
CCAGATGTTTGGAGAGTTCTTGAAGATTTTGCTGTTTTCATCTTTTTATTTTATTCTTTAACCAAAAATTAAAGATGTT
CAGAACTTGATGGTATAGCCATCCCAATTATTTTTAGTTTGGAGCATGGCCATTTTTCTATCTTAAATTAAGTAAATAA
TGCGATATGTCTATAAAAGTTCCTGGTGTAATATTTGTTGACATTGTGATTTATTTAGCTAAAGGCAATAGGGAC
>00055 27 reads, 1698 bases
TTGTTCKYGAGMAGKCATCASMWTTCGCCAGTCTTTCATAAAGTTCTTGTTAAAAACATCTCGTGTGGTGTAATCATGA
TCAAGCATACGACCATAAAAGGTTGCAACCTCCTCAGCGTCTTGTGACAGTTGCATAGGTTTTCCATCAAAATAGAACT
TAACATTTTTAGGGAGAGGTTCATAAGCAGGTGCAAATAAAGGTCCCTTGTGTTCAAGGAATGACCATTTAACACCAGT
ATCCTCTCGCTTTTCTTCCCACCATTTCCACACATCCTGTTGTTCTTCTGTCCCTTTCTTTTTCTTTTTGGCTGCTGGT
TCATCTTGGTCCTCTTCTTTCACTTCTTCTTTTACCTTATTTCTTTTAGTTTTTTTTGCAGKCGYGCWSGACGCTTGTT
TAGATGTCTTTGCTGCTACTGCTGGCTTCTTGTCTAGTTTTAACTTTTTGGCTTTGTTGGCACGTGCTGACAAAGGCAC
ATCACTATCCTCATCTTCGTCATCATTTTCTTCTTCATTCTCATAATCTGATTCATCTTTAGGTCTTTTTAATGACTGG
GTCTTTTGCTTGCGTGCAGACAAGGGCTTGTCATCTTCATCATCACTTTCATCATCCTCAGATTTCACTGCATTTTTTT
TAAACACCACTGATGGCTTTTCAGTCTTCACTGGTGAGTCTACCTCTTTCTTAACCTTTACTGGGGATGGTGTTGTGTG
AGGGCTATTGCCATTAGTGTCTAATGGCTTTAGCTCTACAGGCTCCTTCTTAACATGCTTCTCAAGATTATCATCCTTC
ACTTTGGCTGATCCCTCTTCCTTTTTTGGCTTCACCTCTTCCTTAGCTTTGGATGATGAGTGTGAATGTTTTTCTTTTG
CATCGCCATCTCCACTTTTAGATGATGCGGATTTTGTCTTTTCTTCTTCTCTGTGTTTGGAAGATGAAGATTTGTGCTT
ATCCTTGTCCCTGCTACTAGACTCTTTACTCTTGTCCTTGGGTTTATCAGATGATGAACTGGTTTTTTCCTTATTCGAG
CTACTCCCTTCCTTTGGTTTGCTGCTACTACTGCTACTTTCTTTACTTTTTGAGCTGCTGTGCGATGAAGTACTTTCCT
TTACTTTGCCACTGCTATCTTTAGGGCGACTAGAACTGCTACTGCTGCTTTTGTCCTTGTGGGAAGATGATGAGCTGCT
TCCCTCTTTGTGCTTTGATGAGCTGGATGAACTATGCTTCGAACTGCTTCCATCTCTGTGCTTTGATGAGGAAGATGAA
CTGTGACCATCTTTATGTTTTGACGAAGAAGAGCTCAAACCGTCTTTGTGCTTACTGCTTGAGCTACCTTCATGATGTT
TTGAAGAGCTTCCGTCCTTATGTTTGGATGAGCTATGATGCTTATCTTTATCAGAGCTGCTGCTCTGCTCTGAAGAGTG
TTTATGGGATGATGAAGAGGAACCTATGGTCTTATGATTACTCAAACCATTAACTTTAGGTTCCCCGCTTCCTTCAGAA
GCAGAGCCAACGGAGTCTTCACTTAATCCATTTACTTTGCCACTCAATTCTTCCACGGACTTACTTGTCATGCCGTCTA
CATCTCCTGTGGAAGTTCGAGAAGATTGATCCCCTTCGACAGAAGCCATTTTCAATAAAACAACGAGTTTGAATACCTG
CCAGTGAAATGGCGGACAGGGTTATACATTACCCAGATC
>00056 4 reads, 1505 bases
TCTTTTACCTTGACTAATGAWAATTAATAWWTAGATAAACGAGATTTAGCTGTTTCAAAATTTGTGGAGTACATCACAT
AAAAAAATATTTGGTTAAAATGATGCCAGTCAATCTGAGAAAAATTTATTAGCCTACCCTACTTTACATGACAACAAAC
AATGGCGCTTGAAAACGGTAATAGTAACAACATTCGCCGTTGTGGACAAATAGGAGAAGGCGAGGAAGATGCATTATCA
ATGGTAGATGTTCTTAACGAACAAGCTCGTCTTCAAGCAGATGCTGATGCTGTCTTAGGCGGCAGCGATGAGAAAAACT
GTACATTCCCACAGGGCTACTTGAAGCGCCAAGCCCTTTATGCCTGTGCGACATGCACTCCTGAAGGAAATGCAGGCAT
TTGCTTAGCTTGCAGCTATGCTTGTCATGAGRGCCATGAGCTATATGAACTATACACTAAGAGATACTTCATGTGTGAT
TGTGGAAATGAAAAATTTGGAGGAAATCATTGCCAGTTATATAAGGATAAAAAGGAACTTAATTCTCAAAACCGATACA
ATCAAAATTTTAAAGGTGTCTACTGTTCATGTGGCAGACCATATCCAGACCCAGAAGACTCGATTGAAGATGAAATGAT
CCAATGTATCATCTGTGAGGATTGGCATCATGGAAGGCACCTGAATGTCCAAGTACCAGAGAGTGATAACTTCCAGGAG
ATGATATGTCCAGGCTGTATGTCAAAACATTCCTTTTTGTGGGCATACAATATACCCAGCTATGGGACATGTGTCAGCA
AATGTGATGAATCATCAGAACAAGCCCTTGTTGACCCAGACAGTGGTGAGGATCCTATTAAACCTGAGATTATATTAGA
AGAACAAACTGGCAACCAAATTCTGAGCTCTGAGACTGTTGTGGGTGTCAAACGGGAAAGAACGGAGGATCATAACTCA
GAGGACCCATCAGAAAGTTTCCCAAAAAAGATTAAACTAGATAGTACAACAGAGCTGTCAACTTCTGATATCAAGGGTG
AATGCATCCTTAAAGATTTACAAAAACGTTTTATTGAATGCCCTGATCATGCCTCATTCTGGAAAGAAGGCTGGCGCTG
TAAACTCTGTCGTTGTCATAATTGTCTGGACATGTACAGAGACCGGTCGATTGAGTTTCTAATTGACGAAGCAGACACA
GTGCATGCATATGAAGAGAAAGGTCGTAGCTTGGCCGATTCATCAGATGAAGTATCTGAGGCTTCTGCTCTTGCAGGCA
TGGACAGAGTTCAACAAATTGAAGTGGTCAGAGGTTTTATGGATTTAAAGTCAGAATTGAATGAATTTCTGAAAGGGTT
CGCAAGAGAAAATAAGGTTGTAACAGAAACTGACATAAGAGAATTCTTCCAGAGAATGGACACTCGAAGGAAAGAACGG
CTTCGTTTACCCCAAAACACATGTAGATAACTTAGATGAATTTAAAACCTAAAGAGATCTGCTATATCTTACTGAGTGA
AAAA
>00057 4 reads, 1108 bases
GGGTAATATAAATACCGCTGTTGCTCACTTCGTTATGAATGAAATATAAAACTAACTAAATTTTAATTTTATGAAGTTA
CTTTTGAGAGGCAAAAGTTGGAACACCATCGTTCGATCTCTCAGTTTGAAAATCTTACAGAAAGAACAGACAATGTCTC
GAACTGTCAATCTCTCATTTGAAAGTAAAGAACAGAGTGAAGGAGTGGGTGCAAGGGTGAGACGCAGTATTGGACGCCC
TGAGCTGCGCAACTTTGATCCCTTCCTTATGCTTGATGAATTCTGTGTCAAAGCTCCAGCAGGATTTCCTGATCATCCA
CATAGAGGGTTTGAGACAGTTACTTATATGTTGAGTGGTGAAACTAGTCATGAAGATTTTCTTGGACATAAAGGAAAGA
TAAGAGCAGGTGACCTCCAGTGGATGACAGCTGGCCGTGGCATAGTTCACTGTGAAATGCCTGGAGGGAATGAAGCATC
TCGTGGCCTTCAGCTGTGGGTAAATTTGAGACGCTCTGAAAAATTAATTCCACCCGCATATCAGGAACTTGTGGACAAG
GACATCCCCAAGGGAGAGAAGAATGGGGTTACGGTGAAAGTAATTGCTGGTGAAGCCTTTGGAATAAAGTCCCCAGTTT
ACACCCGCACACCAACTTATTACCTAGATTTCAARATGTCCCCTGGCTCAGTACTAGATCAACCTGTCCCAGCAGAGTG
GAACACCTTTGTCTACATCCTATCAGGGGAGGCTTGGTATGGGCCGGAAGGCAAAGAAAAGTTGTGCAAGGCCCATCAT
ACAACAACATTTAATAAAGATGGTGAATCAATACATGTCAATAATAAGGGATCTGAAGTTTGTCATTTTGTCTTAATCT
CAGGGCAACCCATTAATGAACCCATTTTTCAACATGGTCCATTTGTGATGACAACCCAAGAGGAAGTTAGAGAAGCCTT
TGATGACTACAGATTTAATAAAAATGGATTTGAGAATGCAGCTACTTGGAACTCCGAATATGCTAAATAGTGTCCTAGT
GTTCTATAATTAAACTATCTGTATCTGTCCATAGTAATAGTTTGTCTTTTTTATTATGTTGAATATTCATATCTTTCAT
AA
>00058 3 reads, 1289 bases
GGTCCCCGGGGTTTACTAAAAAGGGCCGCAAATTTATTAAAAYWAYYCAACATTGATCTTAATTGTTGCTGGAAAATAT
GGATGTACTAAAGCCCAACATTATTCAAGTTGGAAATAGATACTACAGACAGAATCCTCTTAAGTATGGAGCCAGTTTC
AATCCTGAAGAAGAAAGTTTTGAAGAAGATGTGCCGAAATGTGACCTAACCTATGCTGACGAGGTTTGTGATAGTGCAT
TAGATATTACTGAATCAAAGAGAGGATTAAGTTTGTCGTTGCTGGTGCCCGAGGCGTACTTTAAGTACATCATTGGCAA
AAAGGGGGAGACCAGAAGACGAATGGAAGCCGAAACTCACACCCAGATTCGTGTACCTAAACAAGGAGACAAGGAGGAA
CACATAGTTATATACGGACAKGAACGCAAGGGAATAATCTCAGCCAAAACAAGAATTGATCTTCTGATAGACTCAGCTC
GTCAGCATCAACCGTTCACTCACTTTCTGTCAATACCAGTCATTTCAGCAGATGTTATTGAAGGATTTCAAAACTTCAA
GACAGAGGCCCTGGAGAAGTTCAGTGGGGAAAAAGGTATGGATCATAGTTTGTTCCAGAATCCAAAAAGACTCCACCTG
ACCCTGGGCACACTGGTCCTTCTCAATGATAATGAGATACGGAAGGCAACATCATTGCTGAAAGCCTGCGAAGAGGAAA
TAATTAAACCTTTGCTTCAAAATGAAAAATTGGAATTACAGATCATTGGTCTTGAATACATGAATGATGACCCAGCAGA
CGTAGATGTTTTATATGCCAAAGTTCAGCCTGGAAAGTCCTCTCAAAGATTGCAGGATTTAGTGGACAGAATTGTTGAC
AAGTTCACTAGTGAGGGTATGATGAAACGTGAACATGATCATGTAAAGTTACATCTTACTGTCATGAATACGCTTATGA
GGAAAGATCCTTCAGCAATATCTGAAAACAAATATCCAAAATTTGGTACCAAATTGCGTGAATCATTCGATGCAAGGGA
AATTCTCAAGGCATTCAGAGATTTCAACTTTGGCTCACATCATATTGATAGCATTCACCTGTCACAACGCCACAGCACA
AACGTCAATGACTATTATAATTGTGTTTCACATGTTCCTCTTCCATGATGCCTTTAACATTCTATTAGTTCAAATAAAT
TTGTGTAGTCAGTCACCTTAGTTGGGATTGTGGATTATTTAAAAATCAATATAAAAAAATATTAAAAGAGATGTGCTCA
CAAATGAGAACCTCTGGGAAACCAG
>00059 3 reads, 1434 bases
TAGCGTCTTTCATAACAGTGCTTACAGAACTGTTAATGGCAAGATACGAAAAAAACTGGTTTCTAGMYRATCTCGGAAA
GAGGCAGCGGCTTTCGGTGTATCAGAGTCAACACTCAAAGCATCGACCCAACAATCCTGGAATGTTTAAAAAGATCAAA
AATTGGAATACCTAAGTGCTTATCTCATACAGAATTGACTATTTGGGTTGATCCTGGTGTTGTGTCATTCAGAATTGGT
GAAGATGGTAGCATTGGGTCTGAAGTAGTGGATGAGGAAGTGTACAACTCCAGCCTTAAATCCAAGATGTCAAACCAAA
GATCCAATTCTGAATCTGATGAAGGATTCTCTTCTCGCAGCTCTAGCCCAGAGTCGTTGGCTTCTGAACGCTCAGGGTC
TGTTAGCCCACCTATGAGCAGGTCCCCAGTCCTTACCCCTGCTAAGTCCAGTAGTCCACTGCCACCAGCTGCAATGGAG
TATAATCCATATTCCCCTCCCGTCCAGGTGTCTTATCCCCATCGCTCTCAAACCCCCTCACAGCAGATCACGGGTCTGT
CTCCTTCCGCTCGTCACTTTCAGCCATCTGGATCTCAGAATCGGCCTTTGATGTCCCATACTTCCATGACTTCTCCTCC
TCAAAGCGACTTCTTGGCTGGTCAGGGTCACATTCCAATATCATCAACTCAGCGTTCTTCGTCATACTCTCGACCCAGA
TCCCTGTTCCCATCTATGGAGAACGGCAGCATGTCACATGGCTCTGTGATGGATGGCTTTGGAAAGGTGGSTTTTWACC
CATACTCCATGCCTATGAACTATGGCGCTAGTCTGCACCAACCCAGCTTTTATGACATTCCAGCCATGGCATAGTGGTT
ATCGCTGAATATCTATAATTGTGTATTGTGTGTGTGTTTATTAGTTACTTTCCATTTTAGTAATAGTAATTGTACATCT
GTTTTTCAAGAGACCTAGGCAGGTGGAAATTGAATATATACTTTCAATGTTTTCTTCAGTCTTTATAAACTTTATATTC
TAAGTGTAATACTCTCAATATCATTTTGACTTCTAATTTTAATTTGCATTATCCTTCAGCCCATGAGTTTTTGTACCGT
GAATTTTAAAGCAAATTATGCTGCTGAGTATATTGTTTAAAGTCTTAAATTCTTCAGATGAAACTTGAGTTTATGATGA
ATCCAGTAGTTGCTGATCACATAATGTAACCACTTTGGTAGTTTCATGTGGGACATTATCAGTTTATCTCAATCAGACT
GCTTGTTCTCATCTAATCTGGGTACAAGGAACTACCAGGAAATGCATTTATTTCTATGAGTGCCATTTTTTTCAACACT
AATAATTAAAAATCAAGGCGTTTCTCCAATKGCAGCAATAACTTGGGGCTWAGGATAGTCATTATTTTATTAGAAGTCA
CAAAAAAAAAAA
>00060 2 reads, 1397 bases
TTATCCCTATTGTCCCATTATAATGTTATTAAATGGCGTCCAACTTACCTTGGCTGACCCGTTTGATTCGAATAAATTG
TTTTTCTAAACATAGAATATGCCTTAATGCTTTTTCAATATTTCAAGATTCAAACTTGACACCGAATCGAGTTGTTGAA
CAATATCGAACTAACTCTACAGACAATGGAGAAAATGTCTCTTTATCACCATCAAGAATTGAAAATAAACCTACTACAA
AGACCATAACTATTAGTCGTGCAATGAAGGCCTATATGGAGAGGGCTAGGACCCATGACAGCATGATGCAAGCTGAGGT
GGCAGATTATGAAATAGGAAAACGGCACCTTGCTAATATAATGGGAGAAGATCCAGATAATTTCACACAGGCAGATGTT
GATAGAGCCATTGAGTATTTACTACCATCTGGTATATTTGACAAGAAAGCTCGGCCTATTTTGAAAAATCCGTATGACA
TATTTCCTAAAAGAAAAGCTGCCCAGTTCAGTTTGGAAGGACGGCCATTGCACTGGCTGTACTACACAGCATTGCCAAA
TTTCTACAATATTCTATATGATATCACTCTTAAGATGGAGGATTTAAAAGAATTAGAGGACAAACTTCTTTCTGAAAAC
AAAACTGATGAACTTAATGTGCCCCCATTAAATCTCACCAGCAGTGAGTGGCTAACATATCAGCAATTACAAAATAAAG
TAGTAGAAAAGGTTCAAGAAAAGGATTACCAACACTTAATAGTTATGATGGAAAGGCTGGTGTCTCATCCTTTAGCTCA
CAGAGAGCTTGCTTTCATTATGCAGTTTAGAAATGTATTACAGATTGAATCTTTAGATACAAATCCCCCTCAAGTTGAG
TATGATGCTGAAGGAAGAAGTTTTGCTTGTGGTGAAGGAACAAGAAAAGATTCTTGGGCCCATGTTAAATTATACATGC
CAGGAACTGGAAAAGTAACTATTAACGGCAAAGATTTATCCTACTTCACTAATTTTCTGTACAGAGAGAGTCTTTTATT
CCCACTTATAGTGGCAGATGTWATTGGGAAAGTGGACATTGAAGCAGAGGCCAAGTATGGAGGACCTACCGGCCATTGT
GGTGCAATCAGATTGGGTATTTCCAGAGCCTTGTGTGCATTTGTTGACAAGGATGTTATAGAAAGGCTACGGCTAKCTG
GCTTGTTAACTAGAGACCCAAGAAAGAGAGAAAGAAAGAAGCCTGGACAAGAAAAAGCTAGAAAGAAATTTACTTGGAA
AAAGAGATAGAATGTGCTTTGGACTAATATATAAAAGTATAGCACAAGCAAGATCAAGAAGTAACAACAAATGAATTAT
GTATATGAATGCAATACAGAGCATTCAGGTTTGAAGAATGTCATCCAATATGCT
>00061 10 reads, 1431 bases
ACACTAAGTAGTAACTTCCTGGTACTTTCGTAACTCTCATGGATGGMTAYCTATRAACTGACKAWTAACTATATTATGG
GAACAGTGCAATCCAAACTTGTACATAGAAATGCAGAAGATGATGACACCGATGAAACCGGACAATGTGTAGAGAGGAA
AAGCCAGGAGAGCATCAGCCTGGAATACTTCCACCACTACGTCCATGAATCTGAGCTGTGCCACACGGGTGAAGCTGGT
CTCTGTGTAAACAAAGCTCTTTGTCAAAAACACCCCGATCACAGTCAGTACATCTCTTCCAGCAAGTTCACCATCACAG
ACCTGCCTGATGGCTACAGGAATGACCTTATGATGAATGTGATACGGTCTCTATGTGACCTGACGGTAAGGGTCACGGT
CAGCTTCACGAGCCCCCTCCGGCCGGACTGCAACTCCAACACCGGGGATCCGTACCCGTTTCAGGAAATTAAAGGGAGC
AAACTGATGCGAACCGGAAGTGGAAAAGTTGATTGCGTGTACATGTTCAATGATTCTGAGAAAACTTGCGTGTGTAAGA
AGTGCAGAGTTTCCGGCACGCCAAACACCGCGTGGGGGGAGGTTTGGATCTACACAGCAACACACCTTGTGTACGATGA
CTCCGAGGCTAAGTCCACAAAATGCAGGCTGTTCTACGACGAGAGTAGCAGTGATTACGTTGACATCGATGGATGTGAG
CTGGTTTTGGAGGCAGACATCGACGAGGACAGGAGCTGGTTGTCTTGCGCAACATGTGACGTCAACTTGCTTAACAAAT
TAAACGAGGCGGTGGCGAGGTGGAACAAGCTGTCCAAAGAAGCGTGGGACACATACTGGTGGTCGAAAGACGTGGACAG
GCTGACGGTTATCGTGTCACACCCCCATGGTTGTCCCAAACAGATCTCCATCGGAGAATGGACTAAACGGCTCAAAGTC
TGGGACTACGATACCAAGTATTTCTATACAGCCTGTACGTGTCCGGGCAGCAGTGGTGCTTTCGTCTACATGCTGGGAA
GAGATGTTCTGTATAGCCATGTTCACAGTGGGACTAACTCGCTCGGAAACTGTAGTGGGAAAGGTTGGTTCTAACTCAT
CGTCTTTACTGTTTGTCAACGGGAGACACTAAATTCATTCAGTCAAAGACCCGAAAGAAACCTCAAGTTAATTTCTAAG
GAAATCTGCATACAAGGATCAGATTTTACTGTGAGATTTTTAGCATCTTCAAGTTTCATGTCCATGAATCTTTCTCTTC
ATTGTTCCGAGACCGAAGACACAAGTTATTACCATGGTTTAATGAGACAGTTAATTAAATTCTATAGACATAACTCTGC
ATTTAAATGAAAATCTCCAGTCTAGACTCTGTAGATTTGACAGTCCACTGAGAGATAGCTATTTATTTTGATGATATTT
CCCCGTGGG
>00062 13 reads, 1472 bases
ATATCGAACAGGAAGCGGTCSACTGRCSGCCKGATGTCAAGGTAGTGCGGTAACTCCGGACTGGCCGCAGACCAAGCAA
ACACTTTATATCAAGTGAGTTTCAGCAGATCCTGAACCGCAATGTGCCCTGTGAAGTTACCGTAACACTGTGTTCAGAG
GAGGAGCAGCAGGCCACCAACGGGCTAGTGGACTGCAACCCAGGGCAATGTCAAACTCCTTCTCCCTCTTTTGATCCAG
TTTCTATGAGTGCCATACCCTGTGGTGCCACCGCTGCTGCTGAAAACCCTTYCCCCGTCAGCCTCGTGGTGGGGGGTCA
GGAGGAAGACCCTCAGGTGGTGAACAACCTCAGTGACATGGAGAATGCCCAGAATGCTGTGCTGAACATTAGGATGGTT
GACCTCAGGTTCGTGCACTCCCCCCTGCACGCCATCTACCAGCACCTCAGCATTGGTAGTGCCTGGGAGGAATTGGCTG
GGAGCCTGGGTTTGAATCTTCAGCAGATTGGCCTGTACCATGCCATGATCAATGTAACTGGTAACTTACCAGCCAAAAC
ATTCCTCACTCTTTACTTCAAGGAGACCGGCTGCAGGCTGAGGGATTTCCTCAGGGCTCTCCTCAGCATGGAGGAGCAG
AACTACATGTGCAGGACTTTGGCCGAGAGCCTCTGGAACGCTGCTCTCTACGGAAACAGCAGCCTGTTCCAGAGCATGC
TGCACCAGGATAACAACTGAAAACTATTTGAAGTTGGCTCCTTGCATTCCACCACACCTTCATTCCTATGGGCTCACAG
AGTGGGGACATTTTCCCCCTGGATAATACATCATTTAAAACATATGTCATCTCTTAAAACAAAGAGGACACCTTCATAT
CATCACTGCTCAATGTTGAATATTAAAAAAAGAAAAGGAGAATGGCGTGCTGTAAGGGTCTTGGGTACGTTTGTGATGA
ATCTGTTGGCGACGCAATAAACAATTACAAAATAGTTTTTAAATTAAGCATCCCCAATATTCGGCTCACAGATAAAGGA
CCTAAATTTGAAGCGATCATTCTAGAAGTTTGTATGAGCTTGGCTCATCTCCGTCCTTGATGAAGCATGAAAACAATGT
CGGAGCCTAACATTTTCCAGAAATAGTATAGTGCGCATTGGAAACATCAGTGGCAAGGAAGCGATCACAAGCTACTCTA
TGGTCTATCAGACCCAGCATAACTGTTCTTGTATTATATAAAGCATCTAGCAAAAATTTTAATTCGGATATGAAGTGAT
TTTTAAAGTCCCTCACATTGATTTGGTTGGCATGATTTTTCTTTTAATCTGTTTTTAAAAGGACATCCAGACCAGTAAG
AAACCTAGGAAAGAAAATTAGCATGTAAAAAAAAACACTTGATTTGAGTTATAAGATCATTCACATATTTTTGTTAGGT
TTGTTGATTTTATTTTAGGTTGTATTCTCGTGCTGTATGCTGAATTTGGG
>00063 3 reads, 1253 bases
AGGGAAACCCGAATTTGAAATGTTTACCTTTTGTCAATTACTCTGGTTTTATTAATGTTTCGGGTCAGTCATACAGAGT
AGATTTGAAAATTCCTAGCAATGGACGTTTGTGTGATGCCCAGTTTAGTTGTGAATGGAAACTTCTCCTTAAAATACAA
CACAAAGTTGACCTTATTCAACAGAGGCTAAAAAATGCAGATAGCATGATTTCATTTCTTCAGGAGTTTGTACACATAG
CCGAAAGCTGTGTAAAAGAGCACTTGACAGACACAGACATTTGGTCACTGCAGACTAGTCAGATACTCCGTCAGATTGA
GGAACTTGGTTGGGAAAATCTTGTAAGTATAGATGAAAGTTTGTCTCATCTGGAATTTGGATTATATGATGATGCTGGT
AGATGGCACAAGATCAAGATCAAATTTAATACACAGGAGCCCAACATACCAGCCGTCTGTGAGACCAGCCTACCAGAAA
CATTTCACTTTAGTTGGTCTGGAAAGACTTGTCTCAAACATATTTTCCAAGAATTCCAAGCAGCTGTAAGTTCCTATCA
ACATTTTTGGGATATGATGCAGGAGATTGATAACAAGTGTTGGGTGCTGGAACCAGAACAGCCGAGCTTTGCTGATACC
AAGAGGAGAATTGCTATTGGAGCCAATTTATCAATTCAGATAAACGTCAACTGTGGACAGCCCTCAACTTTCCCAGAGT
GTCGATTTCTAGGAAGTCACTCAGCTATCTCTGAGCTAAGAGAAAAAATGAATGTCAACTTACACATGTGGGATGCCGA
GAGATCATTGCTGAGAAATCTTCAAGAAGTTTTAGATGTAGACTTTCCAAGTCAAACAGAAACAAGGATAGAGGAGCTG
ACTATTGATTGTGGAATCTGCTACTGTCACCATCAACATAATGAAATACCAGAAATAGTTTGTGAGCAGTGCAAGCAAC
ACTTCCACCACTCATGTCTCTATGAGTGGCTAAGAAGTCTGAGTGCTAGACAGAACTTCAACATGCTGTTTGGTGAATG
CCCACTGTGTGGTCAATCCATTAGAGTCAAGATCACATCCTGATAATGAACCGATTATTTTATGACAGAGTGATCAAGA
AAGGAATTCTGATGAACTTAAAGTTTATGGAACTTTCTGGAAACCTCATAAACTTTGTTAATAAAAGATCTTTCTAATG
TCCAAAGTTATTTGTTGATATTTGAAATGTGTCATTTTTTAAGATCTTATATCTTGATTGAATGTTTT
>00064 23 reads, 1727 bases
CATTTACTTAATATTTCCAGGGTGAAAGGAACGATTCTTACATAATGGGACCAACGGCAGAAGATCTGGCCAACACGAA
ATGTCCGCCGGACTACCCGAACGTATGCCCACCTTCAGGCTATTGTTGCAGTGCCTTTCAGTTCTGTCACGCGGGCGAC
TGTGAGCCATGCTTCCCGTCGACCATTTTGGAAGCACAACAAAAACAATGGTGCCATGATGTTGGCTACAGCAACAGTT
CCAGCATGCGCCATCCCTCGTGCAGGCTTGCCTGTGTGGCCAAGTTCGGCCTGCCAATTGTTCCAGAGAATGACGATTG
TCTATGGTGTTACATTGTAATTGGTCTCCTCATTCTTGCTCTTATAATACTTGTCATTGGATTCATTTGTCACCAGAGA
CGTTTCCATCTTCGTTGCAGAGCCTCAGTATCAAGTATCTTCCTATCACATAAACCGTATTCTGCGGTGAACAGCAAAG
ATGAATCAAAGGACGAGAACCCCACAATCAGCTCTGAAGAGCCGGACATAAAAAAGGAGCAACAAATCGTGCTTACAGC
TAGACAACTGGGAAGCCTAAACTTCAATTTCGAAACAGCCACAGATCAAAAACAGGTGCGCTCAACATGTGATCAMGGC
CACACCACGACAAGAGAAACAACTCCTCCTCCAGCATCGATGGAAAGTGAGAGATGAGGGGGAGCCCCTACAACAACAG
CGTTCAAATCACGTGTCGCGATCTCGCTCTGAGAGTAGACGCAGGACACATTCATCTGATGGCAGCACAGAGCGGGAAC
CTCTACACGACAACTCGGATACAAGCAGAAACAGCAGCCCCGTTAATGTTGGGCGTCAGCCGTTCGTAAACAGCCCCAC
TTGCCCAGATGATGCGTCAAAGATAACAATCGTCACAAGCGCCACAAGCGCATCCGTCCCATATTGAGGCAGTTGTAGC
GGGTGACTGTGGAGAAACTGGAAAACTTTGTTAACGAGTGGCRACCACCTTCAAAAATAAAAGACCGATTTATTATTTT
CATGAAAGATCTGCTACTTTCAATCGTTAATATGACGATATACCAAAACAACAGATGCAATCAACAGTAGTGCTAGTGC
TTCCGTTTAAGTGTAAAGCAATGTTTGTAAAAGATAACTCCGTCTGTTACCAAAGTGCATTTTAAATGAATGGATTTTG
GTAGACACATTCACTAAGTTCCTCCTCACCCCTTGACCAAATTTTCATTCTATCTATGATAGAATATCTGATAAAATAC
GTTTTCGGCAGTCACAATCTCTGAGTTAGTCATCAGCGACACCAAGTCAAGTAACGCCACTGCCAAAATGTTGCCTGGT
CATTGGTCCTCAAAGACACAAAGTCAGGTAACGCCACTGCCAGAATGTTGCCTAGTCATCGGTCCTCAAAGACACCAAG
TCAAGTTACGCCACTGCCAGCATGTTGCCTCGCCATGGGTCCTCAAAGACACCAAGTCAAGCAACGCCACTGCCAGAAT
GTTGCCTCGTCAAGGGGCAACCTTACCTTCGTTACAGCCTACATCCCCCCTTTGTTGCTATATAGAGTATGAATTACAC
TATTTCCGTAGTTTGTAAATGTTCGATCATCACCTGTAGTAAGTCTGATGTAACATTGTATTGATGTGTTATTGTTAAA
GTCTTGTTTTAATTCAATAAAACCAAAGTCAAAGTCAAAAAAAAAAAAAAAAATAGGGATAACAGGGA
>00065 4 reads, 1166 bases
GACGACTTGGCGAGAAGGCTAGAGTTTCAAWWCAGWCTAGAAACCCAGAGAACTACAAGAGAGAAACTAAACTAGACAT
TCACAGAGCTCCTATAAATCCTGAGGGATATCTCCACCCATTTGCCATTGACAGAGAATATCAGCGAGCTTTAAATGCT
ACAAAGTTAGAACGAGTGTTTGCAAAACCTTTCTTGTGTGGTTTGGAAGGTCACAAAGATGGAATAGAAGCCTTAGCCA
AGTTCCCAACACGACTTGCGCATGTAATTTCGGCTGCTAGTGATGGGGAGATTCGTTTGTGGGACTTGGCATCAAAGCG
CAGTGTTAGCAGTGTCTTGGCACATGATGGGCTTGTTCGTGGTTTGTGCGCACACAGAAGTGGAAACTTCTTCATGTCC
TGTGGTCAAGATGCAAACATTAAGTTCTGGGCATGTTCTGAAGAGGGAAACATCACACAGGAACCTGTTAGGACGATCC
TAAACAAGCAAGTTTATCAGGGCATTGACCACCATGAACATGAAGATATTTTCGTCACTTGCGGCCAGTCATTAGATGT
TTGGGCAGGTGACCGGGCACAGCCATTCCAGTCTTATACCTGGGGACTAGGACAGCATGCATCATGTCAATGTTTAACA
GAATTGAGACACATTTAGTTGCAGTGGCAGCAGATGACAGAAGTATCATGTTGTATGACACAAGAGGAAGCTCTGGTGT
TCAAAAGCTAATAATGAGAATGAAATCCAACGCAATCAGCTGGAATCCCATGCAAGCCTTTGTGTTTACTGCTGCCTGT
GATGATTACAACCTGTATACATACGACATCAGAAACCTGAGCATAGCCGCCAGCAAGCATGAGGACCACATAGGAGCAG
TMATGGATGTCGACTATGCACCAACTGGGAAAGAATTTGCGACTGCTGGCTATGACCGGGCTGTTAGAATATTCAATGC
CGTTGAGGGTCACAGCAGAGATGTGTACACTGGAAAAAGAATGCAACGTGTGAATCACATCTTATGGTCCATGGATAAC
AAGTACATATTGTCTGGCTCGGATGAAATGAACATCAGGCTTTGGAAGGCCAAGGCTTCAGAGAAGTTGGGAGTGCTGA
AACCAAGGGAGAGGACTGCATTCAACACAGCAGAGACCCTCAAGAAGATGTTCAAGGACC
>00066 2 reads, 1331 bases
AACAAATCTCCCTAATGCATGTTACAAATGCGACATTTTTTTTTTTAAAAATAAATTTGTAGTAATATGAGAGAAGTTA
TATTATAAAAATGAAATACAAAACTTTTCTTTTGGCATTAAATTAATTAGCAGATAATAAAAAGGAATGTCTAATATTG
AATGCAAGCAAAACTCCAACAAGAAAAGAACATTGTAACATAAAATAAAATGGTAAATTGCATGGCAGCAACTTACTGG
TATTTGTACTGCATCAAATAACACTGAAGTGGTTCACTCCCTTGAGGGTTACACTGCACACCTTAAAGCCTTGAAGAGA
TCCATGAAGGTGTTAGATCATGTTGCTACGCCAGCCTTGCGCTTCTCGCCAGAGGTTTTGCGGTAATCAAAGAGACTGA
GCGCTTTAACATCTTTCTCATAGTCAAGTGACTCCACAAACAATTTGGCCACCTCAAAGTTTGTAATGAGCGGCACACC
GGCATCAATGGCGGCCCTCCTAATCAAATAGTTGTCATGGACATATTTTGTCTTCTGATTCGGAAGATTAATCACCAGG
TCAATCTTCTTGTCCTGAATTAATTTTATGGGTGATGGAAGCTCTCCCTTATCCTGTGCTGTCCAGCTCACTGGTGTTG
TTGGTATATAATGGATGTCCAGATATTCAGCTGTCCGCTCAGTGGCAAACATCTGATATCCTTTTTGACTAAGTTGTTT
GGCCAAGGGGAGGAAGAATGGGTAATAACTCTTCTGTGCACCAACAAGAATGTTGCCTCCCTTAGGGGGTATCTTGAAT
CCTGCAGACATAAGTGCTTTGAGAAAAGCTGTGTACTTGGTGCGTCCAAAGCAGGCCACCTCCCCAGTGGATGCCATTT
CACATTTCAAAACTGGGTCTGCATCTCTCAACCTTGGCCAGGAAAACATAGAGGCCTTTATTCCAACGTAGTTGGTTGG
ATCATGTGGGTTGTCAAGGGTTGGCAGATCTTGGGTGCTGAATGGAGATTTCATCATCACTTTGGTGGCCAGGGCGATG
AAGTCTGTGCCAATTGTTTTGGAAACAAAAGGACACGATCGTGAAGCCCTGAGATTCAATTCAATGACCTTAACATCCA
AKTACCCTGACCAGGAACTGTATGTTGAATGGACCTGAGATGGCAAATCTTTTGGCAATTTTGGCTGTGACATCTTTAA
TTACAGCTATTGCCTCCTCTTGAATGGTTTGAGCTGGCATCATGAGTGTCGCATCTCCACTGTGAACGCCAGCATTTTC
TACGTGCTCACAAATTGCGTGGCAAACCACCTCTCCGCCATTGGCGAGTCGCAGGTAAAGGTGGAGG
>00067 8 reads, 1328 bases
ACCTTCTAGGTCAGCACTTTTATCCTGTACCACCAGTGACCAGGATTCCACGATATCCATCTCACGTAACACCGGGAAC
CTCGTGACCTGCGTCAAGAACAGGTGTGATAGCAGCCTTCCTATATACAAGGGGAGCGTCACATTCAACGAAACTCATC
GGAGAGTCTCGTTGGTCATCGACAAAGTCCGGATGGAAGATGAAGGAATGTTGACTTGTGGCGTCGGAGATCCAAGATC
ATCTGGACATCAGAATACTAACTGTCTCTTCTTTGTGTTTCTCCGCCCTGAGAACCCATTTTGTAGCCGCACATCAAAC
ACCACACATGTTCTGATGACGTGTTCCACAGAGAAAGTTTATCCTAAGGGCGCCTGTAGATGGAACGTGACGTCATTTT
CAGGGGTATTAATCAGTATAATTTCCAAGAGGGCTCAATCAACCCCGCGAGCCGACTCTTACGTCAATACAACGTGTTC
TGCTACCTTCCCACATGACAACCAGACTAACCACACGGTCAAGGTGGACATATTTCCTGCCGACTTCAAAGACAATGAC
ATATCTGACGGCGTGGCCTTAGTGACGATTGTCTCAGGACCAGTCGATGACAATGAAGACGATTCCCATCAAATTGGCC
TCATTTTCTTACTACTGATACTCATCACCGTCGGCATCTTCCTGGTCTACATTTTGGTGGTCAAACGGAAACGACGGCA
GGACAAGAGGAGATCAGGGGTCTACAAAGATGAATGGATCGACAGCACACCGCTAGCTCCGCATCTACCGCCACTGAAT
AAAATCAAAGAAATCGCTCGAAGACCGAGACAAGACTTACTAAAAGCGAAAGCGGAAGTCACCCGTCAACAAGTTGCCA
ACGAAGAGGAGAGGGAACCTTATGCTCGGATTTCAAAGAGTTATAAGAGGATGACAAATGTCGACTATGCATCAGCTCA
CGCTTACAACAATGAGACGATGACTTCAGAGACGAGCAGCACAGAATCTGCCCCTTGTATAGAACAACGCGGTGACGAA
GAGAAAGGGGACACCAATGGGGTGTCTGGAGAGACCATTGTTCAGTCCCATGAACCAGATGAACTAATGTTCAGAACAT
CAGAAAATAAACGGCAGAACGAGGAAATGAATGACCCAGACGACCACGAAACTTCCGAGGAACAAGAAGACATAGTTTC
TCAAACTGAACTCTAGAAATCAACAGAATGTCGGTCATCAAACACAAGCGGAATCCCCCGTAAGAACAAGATCCGTCGA
CTCTACGTGTTGAGAATCCCCGATAAACCATTCTATTTAAATGCAGCATGCAAAAAAAAAAAAA
>00068 18 reads, 1171 bases
CTGCGAGAAGGCTATTGWCCCATKRGTAACTWRGTTGTTTATCAATAACTAGCATGGCGACCGGACCAGTTGATGCCCT
GCGTGTAAGCCAGCTTGATGCATCAGAACTGGACCATGAATTAATTCAGCTGACCAAATCACAATTTTCACACATTTTT
AAGTATCACCCAACAACCATCTTATCTCGWTTTGATCCTGAAATTCGGGCAACTATCAAGTTACTTTTATGGAAGTTTG
CCTTGTATGACCAAGGGGCCACGGTTGGACAGCAGATGTTGGGGATTCAATATAGACAGTCCAAGGGAGGGAAACCAGG
TGTTGCCATTACAGGCAGGGAACAGATTTTATATGCACTTATGGTGGTGGTCTGCCCCTGGCTTAAAGAAAGAGTCTCC
ACTTTGTTGACTTATTTGGGATTATCACATTTGGACTCACAGGTACATTGGTGGCTACACCAAGCTGAGACTGTTCTCA
AGGTGTCGGCACTTGTCAACATATTCGTTTTTTTAAGGAAAGGCGTTTATCTGTCTCTGGTGGAACGCCTACTGGGGCT
AAGAGCACAGTTTCCTCAGAGACACGGTTTGAGGAAGGTTGGCTATGAGTTTATGACAAGGGAGCTGATTTGGCATGGC
TTTTCGGAATTTTTGTTTTTCCTTCTGCCCTTAATCAATTTTCAAAGAATTAAGAATACCTTTACACGCTGGGCTCGAG
GTCAGGGGTCAGGAGATGAAGGTCATTTACAGCACCGCACCCAGACAGACCTGATGAGTTGTGCTGTGTGTAATGAGTG
TCCAGTGTTGCCTCGAGAAGTGGGGTGCCGTCATGTATTTTGCTACTACTGCATCTCTGCTAACTTAGCTGCGGACCCC
AACTTTGCATGTCCACAGTGTGGTCATCCAGTGATCGGTGAGGACAATATACAGGGAGTGAAATCTCACATTAACCCTG
GCATTAGGAAAACATGACACAATTAATTATAAATGTGCTTTACACCCCATATCCTGCCATTTGATACCATCAGAGATAT
CATTGTTAAAAACTATATTTTAATTTGTCTTTCAAAGTTTTTAATGCATATTGTGTATAAAGTTCACTAGTGCTCTCAA
GTCATTCCACATCATCATTCAACCACTTTGTGTGTCTGCCAGGAATCCAGTGAACTAAATTAAAC
>00069 4 reads, 1588 bases
AGAAGAGAAAAAAGAAAAAAAGCAGACGAGCTCTTGCTTTTAGAATCTGACCTCTTGATTAATTTCTTTTCTGCTTGGA
GGGCACCCATTTCTCTGGATACCATGGCTACGCCAAACGGCTCTGCATCACGGATAGATGATTTCATCTCTCGACTGAC
AGCTGCAGCATCATCACCTGCCCTGGCAACAACTTCACCTGTTTCCTCAGAAGCGGATGTTGATGATGCCCCTCCACTG
GCTGCTATCTCCTCCTCTTTGTTGACTGATGGTCCGTGGAAAAATTCAGGTTCTGGGGGCATCTCAATGGCAACAGCAT
TAGCCCCAGATTGTGCACCTTCCATCATCAGGAGGTTTCTGGGCATTGGTTTAGGAGGGAGGCTGTCAACAGAGCCTTT
CTTAACCACCTTACACTTGGCCATGGCATAGGATGGGTTGGACACCCCCTGAGCCGGCTGAGTGTTGAATGATAGGGCG
TCATGCACAGAGGTTACCCACTCCAATAGTCTGGTCTGTGGCATCGCTCCAAAAGATCTGGCATCAGTTTCTGGAGTCT
CAACTTGATCAGTGCTGCCCCCTTTCACCATTGGTTTCCCAGCAAAAGTTGGGATAAGTGGTGGGTTCCCATCCTTTGG
CCTGGAAAGTTGGGCTGCTTGCAATGGACAATCTGACTGAATTTCAAATGGATCTTGATTGGGCAAGAAATTCTGACCC
AGAGATGAGGGCTCTAAGCATAGTGGCTCAATCCCAGCTACAGGACCAGTGATGTCATCCAATAGTATCTGCTCATTTA
CTTGGCTTGTGCAGTGACTATGACTGCTACTAAGCTGTGGGCTTGGTCTGTTGTTAGGGGAATCTATGTCTACTTTCAG
AGCAAAGTTTCCAGTGTTCATCCATGAGTTAATCTTTATTTCCTCATCCCTTGGTGCACTTGGTAGTGGTGCAGTATCT
TTAGGGTGTGGGTAAACCAGAACAATAGGTTGGAACCCACGGGGATAGAATGTGTTGACCTGGGTTGTGTTTGCTGGAG
GTGGGTAGGGATACACAAGCTGGTCGTAAACATCACCTCCTGGATCAGTTGTTGGCACATACACAACAGCATTACTTGC
TTGTGGTTTCTCACTATTCCCCTCAACATCAATGTGAACCAGCTTCTCTGCATCTGCTCTCTTTACTTGCAGTTGTAAA
ATTTCACCTGATGCTCTTGTCAGCTTGACTGCTTCAGCTAGTTCCCCATCACTACCAAGTTCCACCCAGTCATTTTCAT
CATCAAGATATGAAACTCTGATTGCTTCTGGAGGACACTGATACATATCCCGTAGCAATGTCTCAAAGTGTCGCCATGT
TGCCAAATCTTTAGATCGTAAACACAGTGGGTCTGGTTGTTCTCTCTCACCTGTGTCACACAAACGAACAGCTACTACA
AGGCCTTCTTCGTCCATTCTTAATAATTGCCCCCAAAACACATGGAGTATATAAAAATTGTGAAAAAGTCAGCAATTTT
CTTCTGTGAGAATAAAAGTTTGGGGAAAATTAAACAGTWWACAWKWTGGCACTTCTATCAGCAATAGTCATCCAGGGCA
CATTACCC
>00070 3 reads, 1109 bases
GTTCAACAAAATATTTACAAWSWCGYWTAATTCAATGAAACATATAGTTTTGTGACAGTTGCTTCAGCAATTACATAAT
ATTTCTTTCACAATGACAAAGAGAAACAAACGTGCCTTTTTACATGTGTCTACATCATATTTACAAGGATCGAAATCAA
TTAAAAAACAAAGCATATTATTGTTTCCTATTCTTGATTGTAAAACTGTTGCGAAGACAACTAGTTGTTATAGAGCCAA
GGTGGGCAGGTAAAGGAAACTTGGTGATTCCAGCTTTGGCCAGCTGACAGATCCCTTCCAACACAGAACTTCCTCTGAT
CTCAACTGAAGACAAGCATGTTGTGTCCATCTTCACACCGTGAAATTTTAGTTCAAATTTATACAACAAACTCTCCAGA
ACTGGTTGAGGTTCATATCCGAAGTTTTCGACCACCGTCTCAAGTCTCAAACGCTTTTCTTCTCTGTCTTCATCAACAA
CATTCTCAATATCTAGAAATTCTTCTTCTGGGGCTTTACGTTTTCTGCGTTGTTTTTCTACTAATGGGTTTTCAGCTTC
CTCCTTATCTCTGAATGTGCTGGATCGGCACTTGCTGTCCTTTCTCAGAACAATGTCTATAAGGGATGTTACATGTTGT
CCACTCAGATGCATGTCCACAATACTGGCAGCATTCATAACATCTGCAACAGCCTCTGTAAGTAGATCTAACAAGCTTG
ACACCTCCCTTACTAATAATAACATAAGGTGAACCAGGGAAGCTGACAACAAAAACTGAATTTTTAGGCTGGTATGTGG
TGGACTTTGTTCTGCCATTCCCTTGGGACAGTGATGAATTCATATGCATGCGGAGCCATACCCCGCCAGCAAACATTCT
CATATTTCCAACTACGCAACCATCTTTCCATTTTAACTCTAAGCTTTGTTGAAGTTTAGAGCGTAGCGTTCTTGGATCA
AGATTAAGGTTAAGATCAGTTCCTGTTAGTTTATAAACTTTCCAATTACGTCCCAGTGGACACCAACTGAGTGTACACA
AGCTCAAGTTCCCCAATAACTTCATCATTTAAATCACATGCCTCTTCGTTGATAAGTTTCAGTATTTCAGCTATAATTT
GAT
>00071 11 reads, 1240 bases
CTCAAGTGTACAGGTCAAGCAAACTTCTTTGACAGCAGCAGTTACGATCGCTACCATTGTGCCCATGCAGCTGGTGTCC
ACAGTGTGGCTCTGCCATGGGTCAGCACTGTTCAGCAGTTCTTCTTTGATGAAGACTTCAACTTGCCTGACTTCAGAGA
ATGTATAGTGGAACACCTGGTGTGTACCAAGCCTGTTTATTCATGCCCCAACTCTCCAATCCTGGGTATTGATGTCATC
ACAGATCCATTGATGGGTACAACTCTTCTTGTCTTGTCCAGTGACTATGAGTTTACAGCTATTCCCATTGGAATTCAAT
ACCAGCTTGGCCTCTTCCCCAACAATGATGATAAATCAGATGTGAAATATGAACCTAAGGCCAGAGAAACATTCAGCCA
ACAGGTCAAGCAGATCCTTCTGAGGAGGACATCAGTTCCTCTCTTAAAGTCAGGCCTCAGTGCAGAACTAAGTCAACAA
GATTGTTTTCAACTCTTGAGTCGAGCCACTCAAATCTTAAGAGAGGAATACTTCCAGAGACAAGACCATGCCAGACARG
AGATTGACAACAGAATCAAAATCCTCCACGATCTCAAAGTGCATCAACTCCAGGACTTAAAACAGCTGTCTGAATCAAG
AGTGAGTCTACGGGACCATGCCTCATCTATAGCTGATAAGTTAGAGACGTGCAAGGAGAACCACGAGAGGCTGAACCAA
AGAATTGAAACATTATTACAGAAGGTGGGTAACAGGATCCCAAGATTATCTGATGCAGAGAGGCAGTTTAGCAAAGATC
TGAAAGAAATCAAAGAAAACTTACAGATTTATGAACAGAATATTGAACAGGTGAGAACCAAGCAAGAGTTTCAAGAGAA
GCAGATCTCCAAGACAGTCAAGAGTGAAAGGTCCATAATGCAGAAACGTCAGCTGATCCAGATACATGATGTCCTTAAA
GACGAAGGTGATGAAATTGATGACCTGAAGAAAGAAGTCTCTCGATTAAATTTAGCTCTCAACTGAGGTCTGCTTGGAT
AATTTATGCACCTGCTAGATAGTAATCAATATTTTTCATTTAAAATTTTCTTTTAAGGTCAAAAAATGTATTTTTTTAA
AATACTGAACCTCACCTGCAAATTTTTTTTCAAAAAGCTCATAAGTTGAAAGGGGGAACAATAATTAAAGACTTTATAT
TCAACAATCATCACATTCAATCTTAAGTTCAACRWTCRGAAGAGCGGTTCAGCAG
>00072 21 reads, 1973 bases
ATTTTTTTTTTTTTTTTTCCTGACATATTTTTAATTAAAGCAACATTAATACACATGAACATTTTGAATACAGTTTTAC
TTGTTAATTTACAACACAGCTTTTACGGGCAGATATATATATACTACGTGAATAGCTAACGTATCTCTGCAATGGTCAA
TACGTTCAATCAATATCGTGACCAATCATGAATTGTCCTCCACTGACGGCCATTATTTACTGGGTTATCTCAACTTTAC
AGCCAGCATGATGGGTTTGTCAACGACGACAACTCCTATGAATGACGTGGTTATCTCCTCGCCAGGCTTCGGCTGCGTT
CTCTCGTTGAGCTCAAATTTCACTTTCCTCACTACGTGTACGAGGCAGTACTTAAGCTCTATGTAGGCCAATCTCATAC
CGATGCATTGGCGAGGGCCGTAGCCAAACGGAACAAACGCCATCGGGTCTCGTTTGGCGCAATTTTCCTCAGAAAATCT
GTCTGGGTCGAATGTGTCAGGGTCGGGATAATGCTTGGGGTCTCTCATTATYATGTCCAGGGGGATGAATGACCCCTGC
GCCTTTGGGGATGGTGACGCTGCCGTAGGTCCTGGCCTCTGTTGCCTGTCTGGTGATGATGGGGGCTGGTGGAAACAGG
CGGAGAGTCTCATTAAGAAACTGCTCGGTGTACGCCAGCCGTGCGACCTCTTCATAGGTTGGAGACTCTGATGTCACAG
TACGCGTTATCTCTTCGTATACTTTTTGTTGTAGCTCGGGGTATTTGGCCATATAGTAGAAGACCATTTGTAATGTTGT
TGCTGTGGTATCGAAGCCAGCAATGATAATCAGCATGGACTGTCCCAGCAACTCTTCGTGGCTCATCGTTTTGGGGACT
TTGTCCCAAGAAGAACTTCCGCTGGAGTCTGTCACATTCTCATCCACTCTGCTCCCTGCCTCCTGCGCCAAAATGAGGT
TCTGGAAAAGATCAGGGTGGGGTTTCTTCCCTTGACTGGCCAACTCGTTTCTCTCCTTAAACGCGCTCTCAAGAATGGA
CACAAAGTATTGGTTGGCATCTTCTGACACGCTGTCCACCAGTTGGAGTTTTAGTGTCTTGACCAGAAATTTGTGAAGT
CTCTTGTTTTGAAACATTATCAACATAAGGATGTTCATCAACCTGCCGTGTATCTTGAAGATCATCTTGGCGTATCTCG
TGAACTCGTCGTCCCCCTTCCCCACACAGTCCGTCTTGAGACTGAAGGCCGTGCGGGCGATGACCTCACTGGTGAACTG
ACCCATCAGGTGTTTGATGGGGACGAGGTCATCTTTTTGGGCGAATTCCTCCAAGACGCGGGCCAGCCTCGAGCCCGAT
TCGTTCAGAAAACCGGTCACATGCTTTAACTTCCCAGAGCTGAAAGATGGTGTGATCACGTGACGAATACGCCTCCAAT
CCTGGCCATTGATAAAGAAAAGTCCCTTCTCCAAGGGAGAGTTAGATGCCAGAACAATAGACCTGTCCACAAAATTGTT
GAAATCTTTGACCATGACATTTCTAAGAATGTCAAGGTCGCGAGTGAGGAGGAGCATGTCTCCCATGTTCAGACCAACG
GTGTCGCCCTCTTCATTGATCAGCCTGGTCGTCCCCTTTCTGAAGTCATCCAGGGCGATCCTAAACATGCTGACCTGCT
TCACCCCATACTTGTCCCATGTCTCTCTGGTCATCATCTTGTATAGGACGACAGCGACCAAGGCCAGGGTAGTCAGCAT
AAGATAAGTGGACACTGTCCAGCCAGCTTCCACGACTTCAGCTACCGTTTCCATGACAACTCTACATCAACCCAAAAGT
WTYCTTGWAAWCACTYTGTTGTTAGCGTCTAAACCTATCGTATTAAGATTAAATACACTTTTTAATAATTCCGAAAGGC
GTGTAAGCAATCAATGTGTAACAACGGGCGGTGACAGACCCTAACGATTCYTAACAGTTGGTAAAACTCAAGTCATA
>00073 2 reads, 1389 bases
ACATTCCTCTGAAATTTCCGAGTTTGCTTTAATGTGACACTAATAGTGATGTGCTGAAAAAGCATCTTTAACAATAACT
TTAAAATGCAAATAAGTCAGCAATTAAATTCCCATGTTTCCCCATACAACAATTCTAGTGTAAGTTTAACATTTATCCT
TCCAGACTTCTCCTGGCCATTTCTAATGCACCATCATAAGTTTYGYTGCCTCCGATAAACCCAGACGTATGCACAAAAA
TGCAGCCATCAATGCCACTTTTCTTGGAAAGTTCATCATCTCGCAGACCTCTCCATTCCTCCTTCAGAGATAATCTGTT
TTCAAAAGAGCCCAGGTTTAATGGAACACACTGGACCCTCCAGCTGCTGTTCTGGTCAGTGTACAAGACATAAAGTATA
TTAGGGGAAATATTTTCCTCTTGTTCCAACGTAAAGAGGTGATCCTTCCATGGGGCACCACCTTCCTCGAGGCAAATTA
TTCTGCCACTTGGATCAGTCTTGTGTCTGTTTTTAACTGCTTGTGCTACAATTATTCGGGCAGGCAGCCAAGCTGACTG
GTAGAAGGATATTTTTTCAGTGAATTCCTCCCCAACCAACTTCATTGCTTTCTCAAACTGCAGCTGGATATCAATATTT
TTTTCATTCCACTTTGGGTTGTAAGTGCCAACACGACTACTTAATGTAGTAGTTATTCTATATCTTTGCTCACCATCTG
TTTGATTTATACCATTATCAATAGCATCAATTTCCTCCACAAAGGTTTCATACAGCTTGTCATAAATTGTTTGCGTCAC
GCGGTCATCCACTGATAAGGCTAACTTTTGGGCAACAATTTCTGCACCAAAGTGGTAGTAAACAAGACCAGCACTTGAC
AGCTTTGTCACCCATTTCTTCTCTGGATTTAAACTGTGCATGCTCTCAGTAAAACTCCGTTGATGATGATCATATCTAT
GTTTGCTTGGATCATAANNNNNNNNNNACGCCACCGACATCAACCACAATGTCACATGTGTCAAGCAGTGCTTGATCCC
GAGTTCTAATTATCTCAGCATCTTTGTATTCTTCAAGCTGTCTCAAAAAAAAAACATGCCAGAACGTTCATCGCAATGA
AATGTTCCATTGTGGGTTCCTATCTTTTTTTGTAGATGCTGCTGTTTTACAGGTGGTTCAGAAGTCTCACTCATTTTAC
TAGTAAACAAACTAAGTCTTTTAGCAGAGGAGGACAAACAGTACACTTGAAATTTTTTAACTGACAAACATCTGTTTGT
TTTAATTAGAAGCTTAWATATCATTAATAAACCAGATGTACACCTTTATTTAATTATTTTTTTTCAAATAAAGATATTG
ACTGGCGGAAAATAATTTTAACAACGCGGGGAAAAGGCAATGGATT
>00074 10 reads, 1486 bases
AAAAAAAAAAAATAGGGMTAACAGGGTAATAATCTCTGACTATATCTAGCGACATTAACCACWCCATTSTGWACTAAAM
TGTCAAAAAAAACAAAACAACATGAAGATTATTCTAGCAGCTTTTATTGTAACAATGGCCGCGGCCTCCCCAGCTGTCC
TTGACCTTGCCAAAGTTTGGGTGATGTTTTCTCTGAATTTATTTCCACCAAGCAAATTTTGGACCCTGGAAATACTACA
CTTGCTGAAAAAGATGTAAACAAAGAAACTCAGTTTTCGTATTGGTTGGGAGAACAGTTCAGCGCAACCACAGATATTC
TCGGTGATAATTTGTCCCATGAATCCATTGATGTTCAGAAATATGCTTTGGAAGCAATGGTTAAGCTGGTTCAAGCAGG
AGGAGAGCAAAAGTCAAATGACATTAAAGAAAAATTGATAAAGATCATTTTGACACACTTGCTGAGTAAGGACCTACAT
CGAGCACAGTTGATACAGCAGCTACATTTAGAGCACAAAGATGATGAGTCAAATTCAGGCACCGTTCCTTTATGCCTAA
TGCTTATCAGGAGAAAGATTAAATCATCTGAAAATATTGAGCAGCCTTCTGATGTTTTTATGTACAACTGTTGGAGAAT
GATAAAACAAGTGGCATCTCATGCTACTGATACCCAGTCTAGACGTCTGTTGACTGGTGTTGTGTGTGATTTCCTTACC
AACAAGATACCCACGGGCTTGTACAGGGAAATTCTGACCGGTATCTCCACAGTCATGGACAACATGTCCTCACCACTTA
GGCTTACAGACTTTCTCTCAGAATCTTTCAACATAGGTGGCGCTGTCAGTTTGATGAGTTTACACGGCCTCTTTATTCT
CATGCACAAATACAATCTTGACTACCCAGACTTTTATGCCAAGTTATATTCTATGTTTGAACCACAAGTTTTCAGTGCC
AAATACAGAGCAAGATTCTTTCATTTGGCCAATACATTTCTTTCATCAACTCACCTTCCATCTTATTTGGTAGCAGCAT
TTGCCAAACGTCTGGCCAGGCTATGTTTACACGCCCCAGCTTCTGCAGCTCACATAGGTGTACCCTTCATATTCAATCT
AATTGCTCGACATCCAGCACTGGAGGTAATGCTTGGAATAGGCAGAACAGATGGAGGAATTAAAGACCTTACAGATCCG
TTCCTACCTGAAGAAGCAGACCTTGCCAAGTGTAAAGCCATAGACAGCTGCTTGTGGGAACTGGAGACCTTAGAGCACC
ATTATGACCCAAGTCTGTCCCAGAAGTCTAAGAAGAGGAAGATGCCCGAGAAAGATTTGTCCTCCTTGCTAGAAGCCAC
CACAACTGATATCATTGCCACGTATGCTAAGAAGATCAAGAAAGACACAATCCCACTCGGAAGAGCKTTGTAAGAATCA
GTGGCTTAAATTTGCCAGGAAATTTTATTTTATACAAATACATTTCAGTGTTTATTTTACAATA
>00075 3 reads, 1232 bases
ACTACATCTTTTGCTTTGGTTTGTAATCTCAGCATCTAAGGACACAACTTTTCCTTACTCATCCAGTACAGTGGTTCTC
ACAATGATCTCTGTGACACTGTAGGGATCGCAGTTAGATGATGGTCTTCTGTCTTCCAAATAACCTTTCTTGTCTTCTG
CTACCTGCCTCGGTATTCTAACACTAGCACCTCTGTTGGCTACACCTGCTGAGAATTGATTGATGCTGGATGTTTCATG
TGACCCTAAGAGTCTCCGGGCATTGTCCTTGCCGTCATTTGGGTCGTACGCCCTGATGTGTTCTGCTTGTTTCTTGGAA
AGCTTTTCAATGGCTGCCTCGATTTCAACTAATCCTCCTTCCTGTCTCATTGTTTCTGTGCTGTAGTTACAATGGGCAC
CAGCACCGTTCCAATTGCCAGTTATTGGTTTTGGATCAAAAGTCACTCTGACATCAAACTCTTCAGCAACCCTCTGGAG
GATGTACCTGGCCACCCAAAGTTCATCTCCCATGGTGATACCTTCACACGGGCCAACTTGGAACTCCCACTGTGATGGC
ATGACCTCAGCATTGATACCACTTATGTTGATGCCTGCGTAGAGACAAGCTCGGTAGTGAGCCTCGACCACATCACGAC
CATAGACCTTATCAGCTCCAACACCACAATAGTAGGGACCTTGTGGTCCAGGGTAGCCGTTCTTAGGCCAACCCAGGGG
GTAGCCATCATAATCCAAGAGAGAGTACTCCTGTTCGATACCAAACCAGGGTTTAGCTCCCTTGGCCTTCTCCATGGCC
TCTTCACAAGATTTCCTTTTGTTACTCTCCACAGGTTCTTTGTTGAATTTGTACACGTCACACATGACCAGCTTGTTGT
TCCCACGTCTGAAAGGATCCTTGAAGATGGCCCTGGGGTACAGGTAGAGGTCAGAGTTTGACCCCTCGGACTGCCAGGT
ACTTGACCCATCAAAGTTCCATACTGGACACTCTTTCGCTTCCTGGGGAACAAAGTCAAGGGTCCTGCCCTTTGACCTG
ATGCCCTCTCCCGAGCCATCGATCCAGATGTATTCGACCTGTACCGCATTCTTGGGCTGCTCCAGGTCAAGAAACTTCT
GTAGTACAACTTTGTTTGTGCTGGCTGGGTGTGCCTTGGACATTGCTGTGCTGTGTCGTGAAAGAGATAACCACACACT
AACAGYCACTGGTGRCCACMGGGTCCAGATCATAAAGACTATTACCC
>00076 2 reads, 1113 bases
TATGAMTTWAAKWCWGTYWAATAAAATATTAGATCGAAACCTCCATGGAGAGTTTTATTTTTTGGAACAGACGAATTCT
CATTGGGAACTCTGCAAACTTTAAATGAAAACAGATTGTCTGGATCTAGTGGCAAATGTGTTGTAGATTCCTTGCATAT
AGTTCACCCAAGGACTAAAAAAAAAAACACCAGTTCTATGAGTATGCTGCCATGTTTAATCTGAGTGGTCATGAGTGGC
CAATGACACAGATGAAGAATGAAAACTTTTACGATGTCGGTGTCCTGGCCTCATTTGGTCATCTCATTCCCAAGAAAAT
CATTGAAGCTTTTCCTTATGGAATTCTCAACGTTCACCCCAGTTTATTGCCAAGATGGCGGGGTGCAGCCCCTCTGCAC
CATACGGTACTGAATGGGGATGAGAAAGTTGGACTGAGTATCATGTCCATTCAACCAAAGCATTTTGATGCCGGCCCTT
TATTAAAACAGACTAATGTTGAGATTCCAATGAGATGCTCCACTTCATACCTCAGGGATTACCTGGCTCCAAAAGGTGG
CAAAATGATCATGGAAGTCTTGGCCAACTTGCCTGAGGCAATTATCACAGAAACTCCACAATCTGAGGTTGGCTGTACT
TATGCTCACAAAATAACTCCTGACAAGTCTTTCATTGACTGGAACAACCAAACAYTRGAACAGATTGATCGCCAATACA
GAGCCTTACATGAAACAGAGGAGCTTCGTACGGAGTGGTCAGGAACAACAGTTAGACTTATAGAAATGATTAATTCCCC
AATATAAGCCAAGTATACCGCTAGACTCCGAGAGTCYTCCAGGGTTACCCTCATATGATAAGGCCACGTAATTTACTAT
GGGTACGCTGTAAGGATGGCTGGGCGGGTTTTAGTCGTATAGTCATCAGAAAGACAAKGACAGCCAAAGAATTTTACAA
CGGTTATTTATCAAAGAGTCATTTCCAAGGAGTAACTTTTACCAGCAAACCCAATAATTTATTTAATGAATCTTACGTC
GAGTGGATTCATCAGAGGAAACCATCCTGAAAAGACTGCTTTAATTCTTGATGTGTGTCTGCTTGAAGCCGAGATCGGA
AGAGCGG
>00077 17 reads, 1210 bases
GGATAAAAAAAAAAAAAAAGCTAAAATATTGTCATTTTATTCAAACATTTGGTTCATTGCATGGCTATACTATAATTAT
AATGAGATTCATCTTTTTATGGTTTACCCCTGAGGTTGTGCCACCATTTCATGATAGTCTCTCGCTTGGCCCAAATCAG
TTGATTGCCATACTTTGTATACAAAATGCCAAAAAGAACTCCTCCCAAATGTCCAGCATGATCCAGAAACCTCCAGCCC
ATCACAAGTCCTAAAACATCAAATGCTACTATGGCCTTCAAACCTGAATCGGCTGAGAATGAATGGGGAAAGATTTCGC
TAATGAAAGCCACACCTAGCTGTGCATTTGGATATGTCACACACACAGCACCAATCAAGCCCATTATTGCCCCTGAAGC
ACCAACAGACACAGCAGAGGGTCTCTTTAACAACTTGCTACAAGCCATGCTAGCAAATGATGAAATAGTTCCTGCACTA
AGGTAGAATGCTGCAAACTGTTCATATCCCAACAAGTTGACGGTYACTGTGGCAAATGACCAAAGCACATACATATTTA
CAAACAGATGAAAAAAACTGATGTGACTGAAAGAGCTCAACAACATAGATGGCAGTGGATGGCTAATAGATGTAGTAAA
ATATCTAATCATAGTAGGCTGTATGGATCGGATGCGCCACAACAAAAAGACAGAGACGTTGGCTGCCATAATACCAATA
ATCATCTTCTGACCACTGGTTAATTTTTCCCACATAGAATGAGCATGATCTCTAAAACCAAAAGCTTTTTGATGCTTCT
TCTCAAACACAGATTCCTTCTTGCTACCATTTTGTAACTTCTGGAACATGTGTCGCATCTTTTCATAGTTCCATATCAT
GCCACCAGCAAAACTAAAGCCACACACCCCCAATGTGAAAAGAAAGGGCTTTAGCAAAGATGGCGTGTCTTCATCAAGA
CTGGACACTTTGATGTCTTCCACCGCACGTCTAGTTTTAAAGCCTCTCTTAAAGAATAATTGTAATCTGGAATATGTTG
AATGCAAAGCCTGAACTTGTGTATATGTAAGCTTTTGAACTGGAACACATCTGATCCTTTGACCGATTGGATTATGAAT
TCCATGTTTCAGGCTCCCGAATGTTTGCAGTGGCCTTTTCAACAAGTGACTGAATTGTCGACAACTAGTGTAATAGGGC
AGCGCCATTTTATCTGAAGAGCGGT
>00078 14 reads, 1451 bases
GGTAATGTTATTTGTACCTTCAGTTGAGTACGTAAATATTTAGAGATAGGTGAAAAATAAAATAACACTCCTGGCTTTC
CAATTTCATCCCCTATTTCCTTTTTTTTAAAACATATGACAAAATCACCCACAGAACAAGGGGTTTAAGTAAATGTCAG
TGCTAGCTGTCATATAAGAACATTAATGTGCAAAGAAAAGAGCTGCCACCATGTCCTTTGTTTCCTGGTCCAGCTGAAT
GGTACAAATAAAATTGGATTACAGAATACTGCTGCATTTGCCAAAAGGCCATAACCAGGATTTACCATTTCAGAGCTAT
GTATCCAAGTACAAACATCTTTAGCCAGTACTGTCAATTTATTTGTTTACTCAACAGTTTGCATAAATCAATCAGCAAA
GGTAAGATTAAATGTTTCCAGTACTCAACCAACTATCATTAAAAATGTCTCAGGACGGTGAGGGAAATGACAAGTTTTA
TTCTTTTCGAGTGCTGGATTTCCTAGGCCTACGTGCTTCTGGCTCTGGTAAGGCTGCATAACGTGATCTGTGAGCTGAA
TCTCCAACTGCAGCAGGGGAATGTCGAGAGCGTTCTATTCTCCTCCTCTGGTCTATACCCCTGATTGTGCTGCGCCATT
TTTCTTGGTATTCCTGATCAAAGGGCTGTGCTTCTTCTTCATCTAAATTAATAAGCTCTTGGTTTTCATGCTCTTCCCC
AGTTTTTGTATTACGACTTCTCTCTATTACATGCGCTCTTTCTTTGATATGATGACCAACAGCACATCTCTCTAAACCT
GTTTCAGAATCACGTACAGCTTTTCTGGTTTCTTTTACACCACCAGGGCCTTGAAGTGAAGATGTGGAAGCTTGATAAA
CTTTTGGGGCACCATTGCCAGTGTTAGAGTAAGACATAAATGATGAATGCTGATATACTTGAGCATTGGGATCATTAGC
TGTGTGTTCAAAGGCTCTGTGCATGTCATTCATCATAGACCTCATGTTGGAGAACATGGAGCCAAAATGAGCAAAAGGA
TCCATAAAAAGGCTATGCCCAGCAACCTGCATATTTTGCGCTTGCTGCTGCTGGCGTCTGTGGTCTGATCTCCCATCCG
TCAGTGATAATAAGCCCCCTCCATAGCCTCCAAAGGGATCTCTGAATACCTGGTTCATCTGCCTGAAGTGCTCTTGATG
ACCAAGTCCACCAAAAAAATCATCATCACAATCACTGAGGCTGGACTGGCAACGCCCTCTGCGCTCAAGACTGGGGCTG
TTTTCGTTGATATCACTATCACTTGTGTCATGGCTGACTTTGGAGGCGCGCGCCGTCTTTTTACGGTTCTTCACTTGCT
TTTTGCTCATGTTGGCACTACGACATGGGACCACGCACTAGTGCTCAAACAATTGGGCTTAGTCTTTCACTTATTACTA
WWWWWYRTACTCTGATCATTTGGCCTTCG
>00079 8 reads, 1409 bases
AAAAAAAAAAAAAAAAAACCTTGGTAGTCAKCGGAGTCAGATTCCTCTGAGCCACTGCCACTCTCTGACCTCAAAGTCT
TTTCTGTAATATCCTTTCTTTCCTTTTCATCACGACTATTACGCGCAGGACTTGCACTCCGGTTACGGGCCTTTTCTTC
CTCATCTCGTCCTCTTTTGCTTTCACTGCGTTTTTCAGTATCTCTTTCTTCCCTTGGCTTAGATTTGTCTCCACTACCT
TTGGACAAACTGCTTGTTGGAGACTTTCCCCTTTTAGTTAGAACTATTCTTTCCACTTCTCGAGAATCCCTGGGTCTAG
ATCTTTGTACAGGACTTGATGACCCTCTCTGTCTCTTAGCAGTTGAGGAATCTCTTGGTGGAGACGGGCTACGACTCTT
GCTCCACTTGCTGCCTACATGACTCTCCTTTTTATTGTCCATTTTATCTTTTGGTTTTCTGGTTTCATCATCATCACCT
GAACTACTTCCACTGCTGCTATCTGATGCAGATAAATGTCTGCGAACAGCTTTTGGACGTGGACTGATTGACTGCTGCT
TTGATAAGGATTTTTTGGGAGGAGATCTACGAGGTGAGAGAATTTTACCTTTGCCTTTAGGAGAAGGTACAGGAGATGC
ATTTCTGCCCTTGCTTTTAGGCGAAGGTAAAGGAGAAGGGTTTCTCCCACGAGGTCTGGGTGAAGGCGACACATTTCTT
CCATGACCCTTTGGAGAAGAGGAATGTTTCCTCTCCCTCCTGCTGGGAGAAGAACGAATGTCTTTCCTGTCCTTACGAG
ACTCACTTGAGCGTGAAATGTCAATGTCTTTCTTAGCTCTGGGTGGAGGTGACATTGCTCTGGTCCTGCTCCCCCTGCT
AGGACTTCGAGATGGCAGTCTACCACCTCTACCTCCTTTGTCAACAGAACTTCGTATTTTTGAGCTTTCAGGAGTTACA
GACCTCCTTTTTTTAGGTGGTGGTGATAGGATTTTAGATTTCTTTTTAGGTGGTGAAGGGGACCCTGACTCATCAGAAT
CATCTTCACTCTCAGAAGAGGATGAAGAGGACTCCTTCTTAGCTGGGATCTTCTTGGGTGGTGGAGAACGAGATCTTTT
TCCTTCTTTAGACCTTGTTGGTTTTCCCTTTGGCACTGGTGAAGTTTCTCGTTCTGATTCCCCTGAGCTGTCGTCTTCC
GATTCAGATTTTGGTGGTGAAGGCTTCTTTTTGGTTTTAACTGGAGGTGGTGATACAGAAGCTGGTGAATGCAGTCTCT
TTTTAGGGGAGGGTGAGGTTGAATATTTGGCACCCTTAGCTGGTGGTGGTGATGCCAGACGTCTAACAGGGGAAACAGA
GACTCTTTTTCTTCGGGGAGGTGAGGGTTAACTACGATGTCTGGGTGGGGAATATCTTGGAGGATT
>00080 17 reads, 1106 bases
AGTACTAAGGTCCTTCGAAGWWTCAGTYWMAGGAACTGCTGTATAAAAACAAAAACTCTTAATAAACTATGTAGTTTAA
GTTATTCGCAAAGTATTCAACTGCTTCTTCCATTACCGACATAACCATAAGTTAATTTGAATATCCGCAATGGCCACTC
AAGTTCCTTTCGAGACAATAATGAAGCGATATCCGTGCACATTCAACATCACCCCAGAAATACAACCCCACGCCAAGCT
GGGAGAGGTACAAGGAAAGTTGAAGTCAGAGATTCAAAAACCAGGCGATGATATCGTCAACGACATTCGCAATAGGAAC
TTGCTCACGTGGATCGAGTACAAACTGGGGGATACGAACTCGGCATGTAAACAAAACGAAGAAGTTATTCAGATGACAG
GCTCAAATGACATGGTATCGCTGGCAAATCGAGTTTTTCTTCTAAAAGAAATGGGAGTCAATTACGATTCAGCTTTACA
AAGTCTTGACACTTTAACTCGTAGACCAGATGCCGGGAAATTAACTGGCACAGCTAAAGCAGATCAGGCGTATTCGTAC
GCAAGGATCGGCGGACCGAAAAATCAGCAATTTGCCATTAATCTATACATAGAAGCACTTCAAATAGAACCCAACAACT
TCCACTGGAAATTTGGTCTCGGTCTTGCTCTAAGAAGATCCATTCACCAGAATATGGCCAGATCAACCGATTTCACCAT
GTCTTTCGCACAGCGTGTCAAGGAAGGGGCGAGAATTTTGTTTGAAGTGGCAGAGACCGACAACCGGGAGAATATGTTC
AGGAAGCGCGCCTACGAGGAGCTAGGTTTGATGAGAATGTTTGTGGAAAAGGGGAAAGGCGTCCAAGCTGGGATCAACG
TCAATGATGTTTTCCGTAACATGAACAAAGGTGATTTTGACAGGATGGCGAAGAAATAGTAAAATAAGACAATGAAAAG
GGTGATGAGAAGGAGCAGAATAGGCTGGAGGGTGGAATGGGTCTATCGTTATTTGAGTTTAATTTGTAGGTTGTTGTTG
TTTTTTTAAACCATAACATTACGAGGGAAATTTGGAGAAAATTGCTAAGTGTAGTAGAGACGGGGAGTGATAAATATTT
>00081 7 reads, 1369 bases
CGCATTTCTAGGGGACGTTAGTTGGCATTTCTTTGGATTATTTTAGATAATTTCTTAATTAGGATTAATCATAGGTTTC
AGATTCTAATTTTTAGAACAAATACATCATGGTTAGTGTACATCACCTTGTCGCCATAGCTGTCATCATTGTACAGAAC
AGCCAGACAGTGCATGCACAGACATACTCACTTGATGGAGAAACCTGTCGTCGACAGTGTTTAGGCGCCTATGAATTTT
ACCGGCGTTTCGTCATTTCCACTGAATTCTTGGATAACTACCTCACATCCTGTTACTCGAGATGTCCTTCAGTCTCAAC
TAGCACCACGACAACTACCATCAGACCTACTACCACCAGCACTGCTACCAGCACATCAACCAGCACAACGACCAGCACA
ACGACCAGGACCAGCACACCAACAACGTCCACCCCAACACCAATCATCTCAGATTGTGGCGTGCCATCAATCACCAGCA
GATTTAGGATAGTGGGCGGGACCACCGCTGCCAGGTGTGAGTTCCCCTGGGTGGTGGCCATCTCCATTGACAGGAATTT
CTGTGGCGGGTCAATCATTGGGAAGCGATACATTCTGACAGCGGCCCATTGCCTCAGAGATAAAACACCAGCCCGTGCG
GTGGTCAGTCCATCCATTGTTACTGTCCGAGTTGGTTCCTCCAATCTCTATGAAATGAAAGCTTACCAGGTTCTAGCGG
TTAACATAAATCCTAACCACGTACCCGGCTATAACGATTATGACGTAGCTGTCCTGACACTGACGGAGGACCTCGTTTA
TTCCGATTGTGTCGCACCCATCTGTCTACCCAACATTGGAGACGACGCTGCACAGGCGGAAACGTGCATTGCTGCGGGT
TGGGGTGTGACGTCGTTTACTTCCTCTTCCCTGACCCCTGACCTCCAGAAAGTGACTCTACCCATTGTTAGCCAAGCCT
TGTGTAATTCTTCCTACGGTACGGCATACATCAATGACTTGAAGTTCTGTGCCGGTAACTTTGACTTTGGCGGCATTGA
CAGCTGTCAGGGAGATTCTGGCAGTCCACTTATGTGCTACTCCAAAGGTCGTTTCTATGAATACGGAATCGTGTCATTC
GNNNNNNNTCTGTAAAAGCTGTGCTGAGCCACGTTACCCGGGTATCTACACCAGAGTCTCTCACCCAGCAATCAGGCAG
TTTATAACAGCAATTACWGGTTAGTTAATCGGCAGAAGATTGTTAAACATCAGACCAAATAGAAGCGTTTCTTACGGTT
GTGCAAGTGGAAAACACGGAATATTTTAGATTCTATTTCATATTTGTTCCAGAAAAAAAAGTATGATTTATCTATTTAC
TGTAACCATGGTGATTTCTGAAATTT
>00082 10 reads, 1190 bases
TTTTTTAAAGAGTATGTTCCTAYAAGTWCATGTGACTGGAGCTAGGAGACTTGCTAAAATAGCCAAAGAATCTGGAGTG
GAGAAGTTTATTCATGTTTCACATTTGAATGCCAAAGCAGAGCCACAGACAATTTGGAAGACTTCTGCATATCTCAAAA
CAAAGTATGAGTCTGAGCTTGTTGTTAGAGAGGAGTTCCCAGATGCCATTATCTTCAAGCCGGCTGACATGTATGGCAA
TGAAGACAGCTTCCTTCATTATTACAACTATAGATCTAGGTGGTCAGCCATCAGCCAGTTCTTCCCTTCCTGGAAAGCT
GGAATTCCCCTGTGGAAGAATGGAGAGCATACCATCAAGCAGCCTGTTTATGTTGGTGATGTAGCAGAAGGCATTGTGA
AAGCCATCCTAAACCCTGACATGGTTGGGAAAAATATCCAATGTGTTGGTCCTCAGAGGTATTACCTTGCTGACATTGT
GGACTTTATCATAAACATTCTTAGACGTGAAGAGGTGCTCAAGAGGACTGACAGGACATTTTTGCTGAGACTAAGAGCA
AAGTTACTGGATTATATTCCCACGAAGCCATGGTATAATGCTGATAAAGTGGAAAGGGAGTTCATAACAGATTGGACAG
TTCCAGGTAATCCATCACTAGAAGATCTTGGTGTCAGCTTGACTCAGTTGGATGAGATGGCCCCATTTCTATTACGCTC
CTACCGAATGAATGCTTATTATCAAGAAAAAATGGGAGAGTTTGCAGATCCTGTGCCCCCCAAACCAGCAGAATATTAT
CAAGATAGACAACTCTCTACATCTAGTTAAAAATGTGTAGTTCTTTTGTTGTTTATTTTATGGGATTTGAGAATCAGAG
ATGGCTCCAGGTTGAAAAGGTTTCTTAGCTAGTTTTCATGAATATGTATTAATAAATATGTACATAGTGTTGTTTGCTG
CATTAATAGTGATAGGAGTCTGTCACTTAACTAATGGAATGCCCAAATAAGTTTGAGAGACTTTATTTAGAGTTTGTTT
GGTGCAGATCGCATACCGTTATGTGGATATCGCACTGCAAAGGTTATATACACTATTTACTGTATAACAACAGTCTGTA
ATATTAAGTACCATATACAAAAAGTCAAGTAGACATAAGGATTTTCTTATGTCCATGAAACCASWASAKCGKCCATAAT
TCTCT
>00083 14 reads, 1315 bases
CCCTATTTTTTTTTTTTTTTYTYTGTTAAAGTTATCAGCAATAAAATATTAGCCCCAATGAAAAAGAAAATGAAAGCAA
AGCATGAAACAGCTACAAGAATAGGTAAACAAAGTCAGGCAGTTTTATGGCAGACAGGAAAGGTCAAGTCAAACAAGAC
AGTGTACCCCTCTATACTAATATGGGAATTAAATGCAAGATGCTCTTGAAGTATCCTAGGACTTGTACAAGTAGCAGAC
ATAAAATGGCAGGGTAAAGGAGATTTTAAAACAAAGGTTGGTTTACACTGTGTATTCTATTGACAATTCTAAAAAAGTT
ACTTTACTATCATTGAGTCTTCAGATCAGCTAGTACTATAAGGCAGTGTTGGTCCATGCATGCAAATTTTATTTCATTT
CCTGGCCATTTAAGGTTTTTTTTATTTATTGGCTGTCGTCTGCCATCCTGCTGTAGTTGCCTCCCCTTCCACGAATGCG
ACGGTACACCTTGGGTACCACAAAGTACAACACGAGACCTAGTAGGATTCCAATGATGAGACAGGCTGGTACCCATCCT
GATTTCACCCATCCACTGTAATCAGCCTCCTGAGGTTTCTGAGTGGTGGTTGARACTGGAGRCGGAGKAGTATCTAGAG
CAGTTTAACTCATCAGTGTTGTCACCRCAGTCATTCTTCCTATTMCACAGCCATTCAGGCCTCATACAGAGTCCATTCT
GGCATAGCTCAGTTGAGCCGCACGTCTTGGTTTGATATGAGATGTTAACTTTTTCAGTCAGATTCTGAATCAGATGCCA
TTTGAAGACAAGAATATTCCGAAGTGAGTAGTTGGTTTGGTTTAAGAAGACCTCCAGTACATTATCCCTCAGAGACCCG
CCATCATAGACTGTCAGAGACTCTTTTAGTACGGTGATATTCAGGTTGCTAATATTAAACTTGACAATATTGGTGGAGT
TACTCTTGTCTGTTTCGTTTTTGACGTTGATGGTCCACACACAGAGACTTCCAGCCCCGGAAGGTAAGACAATGACATC
AGAAAACTTGGTCAGACTGGCTCCACAGTTTGGTCTCTGATATTCGACTTTGACCCCTAGCCCCACCTGGCTTTCTTCC
CCATCAGTTGGAGAGCTGAACTCTATCTTGATGGAGTTGGTGGCATTGATCAGCAGATCCGCTGTTGGTAGAGTATCTC
CTTCAAATCGGGCCACCTCCTTATCTTTATCTGTCACCACGAGTGAATGTTTCTTGGCCAGCTGAAGGCTTATAAACTT
TAGCAGCAGCATCTCATTGGGAAATCGTAGGAACTACCAGGTGTTCGTAAA
>00084 3 reads, 1414 bases
TAGGGATAAAAAAAAAAAAAAAAAATGTTCCGCCATATTTTAATGCACAAGTGCTGAAAACAGTTTACATTTGGACATA
TGAATGGACTTATTCTTTAGTGTGATGAACTCTTGTTTTATATTTTTTTATGTGCACGTATGACATKTMWAGWCAACAA
GGTTTCAAAGGTTACACTAAGGGTGACGTGAACTTGACAAAAATCCCTTAGATGCCCGAATCCGGCCACTATAACTCGC
CAGTCCTGCTAGCAGGGGTTAAAAAAATATGTCACGGGCCCAATAGTCACAGCATCAAAGACAGTTTTCTTGAGCCATC
AAATGATTTCTCCTCTACGTAACCGAAGACACGCAGAAATCCTTGTGGCCGGACAAGACAAGGGGGAAATTACTGAGTT
GAAGAACTGAGCGATTTTAAGAACCCATGCATACTTGCGACACCAAAAACCCGTTACAGTAGACAAATATTCAATAAAC
AAACAACAAATCATGTAAACCACTTGAGAATGTAAGTAGCACTTCTAAACCAGTTTGTCGTAATGGATTTCAGCGTGTT
AGGAATAAAAGAAACCGAAGAAAATAAATTACATTAACACAATAATGATGCCTTGGTATATGAACAACTTGGAGAGAGA
GAGAGTGAACAACGCCATTTTTAACATCAGCATAGATATTTATTTGTCTGTTCTGGGCCTAGCAGATTCACCAGTGGCA
GGACAAATTCTTCTATAACAGACTTTTTTGTTGTTGTTGTTGTCGTCTCGTCTTCGTATGGAATTTTCATCATCTGAAA
GCGGCACACTCCCATAGCCCAAAAGAGCCACAAGATCGCTGCTAGCTGGCGAGTAAAAAATTTTCCAGGCCTGCGATCA
ATTTGGATGATGTTGTTTGTTGTTTTCTTTTTTAAATAATTGATGAGGATTTTGTGAACAAATAGTTAAAATAAAGATC
AGCGGGGGTCAAGGTTACATGAAGGTGAAGGTCAAGGGCTAGGACTTCAGTTTGAGCACATCAAGTTTCTGAATTCTTC
CCATTCTTTGTTACTTGTTATTCTCCATGGCTTGATTGACACAGCACGCAATCGATGATGTGTGCTCAGCTATCGTGCG
TTTCTCCCTTGTCCATGATGTAGTGCCATCGACAGATCTTCCTCCCATTGCCGACCATGACCTCCTCCCAGTGCTCAAT
AACACTCTCCTCAGTGGACCCAAGGCCCATGATGACCTGCCCTAGCATTGGGTCACCTCGCAGTCTGTCTCTGTCGTGT
ACACTGAACACAACTCGAGTGTGGCTTAAAGCCTTCGATCGAATGTTGATCGTTGAAATCGTTGGTGTTACAGTTGATG
TTGTTATTTACTTGTCATTAGAATATCAATAATTACTTTTTGAGATGCATCAGATTGCTCCTGATAATGGG
>00085 2 reads, 1094 bases
AATAGGGATAAAAAAAAAAAAAAAAGTTAGATWWCAGTMSRTATATTTATTGACATGAACAGTTTGAGTTGTCATGATG
TCACGAACATTTTCCAGCTTTTCTGTGAGACAGTCTGATAAAGTCAACTTCAATGTCAACAGATTTTTTCTTGTGAAAC
TTAAAAGTATTTGATAGATCGTAGCGTAGTTCAGCTATGACCGATACATCCACTCCCCAAATGGATGCTTTTTTTAGGA
TATGCTCTCTGGTGGATGTTTTATGAAGTGAATATACAGCATTATGTGACAGCTCAAGTGCAGCTTTAAGGAAATCAAT
ATCTATTCCTTCATTGTGCTTAGTCCCAAATGGGGGATTCATCACCACAGTATCAAACTTCTTAAAAATTTGACTTGAT
TTTGGATCAGAACCAAATAAACATCTAACATCAGAGGCCATTAGATCCACAGAGTTTATTTCAAATTCAGACAAATTAT
TGGAGCAAGTTTCCAAAGCATCTTCATCAACATCTATTCCAAGAACATACCCGGCTTTCATCATAGTGGCACCAATACT
TAATATGCCACAACCTACTCCCAAATCTGCCACACATTTGTCAGCCAGATCGTCATAGACTGAAGACATTGTATGCAGC
ATGCATGCAGCAATATGTGGTGTAGTAGGATATTGCTCTAGCTTGATTTTGGGGTTTTCAAACACTTCAACATCTTGTA
AATGTGATTCCAATTCTTTCCGTTTCATACACTTGANNNNNNNNNNCTGAACGCGCCATTACACATTAAAAATGTAATT
AATAATTAATTGAGTCTGTTTTAGTGGGAACAAAATCAGAGGATGACTGGATTGCCAAGGCCAATCTTTGTTTTGACAA
TGACTAATACTTCACTGAACTGCTTGCTTGCAAAATATCTTAATAATAGTAGCCGTAATAGTAAAATAATAGTAAAGTA
TTTAAGAAATTGAATTGAATAAGTGTCTATGAGGTCAGAGTATAGTTTAGTATGAATCACCATGAATTGTGTATTGCGT
GTCATCCACCCAACTGAGCCCAACTGAGTGGGCACCGCGCGTTACGCGGTGTCTACCATCGGCCTTA
>00086 4 reads, 1593 bases
AGTCAGTTCAACCTAAGGCAATRYTAAWKTCAATAACAGTTACTGTTACATCCAAAAGAACCAAGCATTAAACTTTATG
GAGAAAGACAGTGATATTTTGCTTAAGTACAGAGCAGTAACAAATAAGTTAAAAAAGAGATTCCTTAAAAAGCCAAATG
TTGCTGAAGGAAGCGAACAGTTTGCAAGTTTAGCAAAGAACCTAAAAAATCAAGAATGCCCTCAGTATGCTGGATTTTG
TTGCCTTGCCCAAGCCAGGTGTGAACATACATTATCTAATGCTGCTGGAGAGGCGCAGGCCCTTACTGATGCAGCTAGA
GCTTTTCTTGAGGCTGAGTTGATGGACAGGGAATTGAGGGTACCAGGATTTCAAGAGCATTTGACATCATCTATTAATT
GCTACAGTCATGCCATCAGAGTGCACATAGAGAGCAAGCAGATAGCATTAGCTGCCTCTCTTTGTCTAGAAGTTGGAAA
TATACTAAGAAAAGTAAACAGACCAGGGGAAGCAATAGCTCATTACCAAAGAGCAGCAGAGCTCCAATCACAGAGTGCA
TTAGACTGTTTAGATGCCCTGAACATGGTAGCAAGGTGCAAGATGGACACAAAAGATTTTGAAGGAGCACTTGCTGTTT
TAACAGAAATGGCCTATCTGGCACATGAGAGAGGAGGATCATCTACCACTGGTCGGCCCATAGGTGCTTATTGTGATAT
TTTAGCGAAGTGTGAAGTTACTAGAGTTTTACTGTTACTGCTGTTACAGCCAACCCCTCAAAGAATAAGACCAGAACAT
GCTCAGACTTTAGAAAAATACACTTGGGAATCATGTGATAGTATTACTGAAATGTATCTTGGAGAAGATTTGTATCTCT
TGCTGCAATCAGTTGTGATGGCTTGTCAATCCCTGGANNNNNNNNNNTCTTGAGTCACTTAGAGCATTACAAAAAGAGC
TGTGGCCCCTTTTTGACTGTGAGCAGAATCAACTATTGCATCTGGTCATTCAAGAGCTGGCTCATCCAAGTGGAGAGGG
CATATGATTACCAAGATAGGATTCAGAAAATATTAAATAATATCTAACCTGTATAAGATGGCTTAGGGTAATAAGCATT
TAATTTAACCACAAAAAATGCAGACTTATGAGAAACTGTGTTGAATATTAGTAAAAACAAGTTAAATCTGAAGCCTTTT
ATTGTTGCCGTTTCATGACAAGATTGAAGTCAGAAGTGGCCAACAGCAAATATTTTCTGTTTCAAGGATGTAATTATTG
ATGCGTGCCAAAAGGGGCCACCAGTGACATAACTGTTGTGGTGTGTAGGGTCTCATCCAAATTTGTCTTATGTGCCCTA
AGTGGCACATATGTCATGAGTTTGCCACCCTGATCTGAGTTAATGGAATATTGATTTGTGTATATTTATGTACATTKAT
GTATTAATGAAAATAAGATGTTTGGATTCTATTTCTTTCCAGAGAAAGAGAGCTGCATTATTTTATTTGTAAACACTAA
GTGTTTAATTTTGAACAACTTATTTCTTTTTATTATTGTGTGCTTGAGAAGAGGCGACCTTTAATTGTTTAGTCTTTTT
TTTTTTAACGTCA
>00087 4 reads, 1647 bases
CCCATTACATTGATTAGTGGTGAAAAAATTAGAGCTTGCCARCGTTCAAAAWWACATGCCACAATGGATTTGCTATCTT
TGAAAATGATTTTGTTTTTTATGAATGTAATTCAACTTACAGTTGCTCAGTTAGGAATTACAATCACCCCTGCTGTTAT
TGAGGCGGAGATTACAAAATCTCTTGTTGTAAAATGCAGCTTTCCCCCTCAACCATCAAATGGGTATCAGATTTTTTCT
TTAGACCTTAAAAAATACGTCGAAAATTCCACATTTGTGCAACTAGCTTCAGTAAATAGAGATTCTCATACAACGGTTC
ACATAGATGCTCCCAGTTACGGCATTAGCAGAAGTAGTGGATTCATTAGCTCAACCCAGGGATCTTTCTTGACTGTGGA
ATGGTTGAACCCTCGGGTTTCAGAATCTGGGACTTACCTGTGTAAAGCTAATGTGTTTAATCAAGCAGATGATATTATT
GTCTTCAATGAAAACAAAGTTGTCAGCTTTCAACAACCAACAGTTAGCACTTTAATCCATCTCATTAAGGATTTAGAGT
CGGGTTTAAATAATAAAACACAGACAATGGAGACAGGGCTAGATTTCAACAAACTTAAGAATGAGTCAACTCAAAATGA
AAATAGACTACTGAAACTAGAAACCGAGCTTGGGAAATTAAAATCAACACTGTTCAAGATATCAACAGTTTACAACGGC
CGACACTATTATTTGTCCCTATATGAACCTCACTCGGCTGCCAATGCAGARATGGCGTGTRAKGCTCTAGGTGGCTACT
TGGCGGAAGTAGATACTAAGAATGAATTGGAATTTCTAATATCATTGGTGGGTCGTCCAATGGGCAGTGAAATAGCCTT
TCTTCTAGGTGGCACAGACGAGCACCAAGAAGGTCATTGGATAAACCGTCATAGTGGAACGTAATTTGGGTTACACGTC
ATGGCTTGCAGGCCAACCGAATAACTCTTTAACTTTTGATTTAAGACAGAACTGCCAAACTCTTTATTATTACAGAGAA
TATTTGTTCGGAATGGACGATCAAATTTGTTTCAACTCAAACCTTGGCGTTAAATTTTATTTTATTTGTGAAGTACCAA
TTTAAACCTGAATTAGACAAATATTGTCAATTAATTAGTAAATGCTTTTTTTATAGCGCTAACCCTATCCATGCTAGAC
TAGGATGATGGTCGCCTACTGATGTTCACAAATCCTGTCAAATAAAAAAAGATCTTCACATTTTTCTTAAAATTGTTGC
AGTTGAATAATAGCATTTGCGTCGCGTTTTGGTCGTCAGCAGCAACACAGGTGATCCATTATTAATGTATACTTAACAC
AAGTTTTTTTTAATCTAGTTGATTGATTTTTGTTCATCTTGTGCAAATAAAAATCCAGATAAACTTCTGGTTAATCTCA
AACGATAAATTCACTGTCACACCTTTTCAGTATTACATATATCGATGGAAAATTATGTTTTTCGATTATCTATTTATGT
ACACTTCAAATTTTCTTTTATGAACAGTACCGTTTGTATTTTGATATAAATTAAAAAAATGACCTGCCWGATTACATTT
TTGAGTGTAATTTTACGCCAAAATATGTCACTAACGGGTATGATTGAATAAGAAAATAGATTAGCAA
>00088 11 reads, 1461 bases
TTGTCCCATTATTTTAGAACCGGAAGGAWAACASGGTAATCTAGGCGCGTGGAGTAAACTTGGTGTTGCACACGAGTTG
TTTATCTCTCTAATTTCTTAAAGATATTAATATTGAAAGTCTATAGAAGTCAACATGTCTGAACTCAGTTGCAATGGAG
ATGCAGAACAGACAAAAAAATTACATGAAAANNNNNNNNNNAGTTGTCAAACAGATAGAGTACTATTTTGGAGACATGA
ATCTCATGAGAGATAAATTCATGAAGGAGAAAATACAAGAAGATGATGGCTGGATTACAATAGAGACCATGTTGAAATT
CAACAGGTTGAAGCAACTCACTGCTGAACCAAAGGTTATTTGTGAAGCATTGAAACAGTTAAGCTCACTAATGGAGGTT
AGCGAAAATGAAGAAAAAATTCGCAGGAATCCTGCTAAGCCTTTGCGCCGGTGACACTAAAGAGAGGCGTGATGAGATT
GCTTCCAGATCTATTTATGCTAAAGGATTCCCTCTTGACTCAACACTAGATGACTTAATGGCTTTCTTCGAAAAGTATG
GCTCTGTTGAAAATGTCTACCTAAAGAGAGATTTTTCCAAAAAGACTTTTAAAGGATCAGTTTTTGTAGTTTTCAACCA
GAAAGAAGATGCTGAAAAATTTATCAAAGAAGAGGAGACAAAATACAATGATGCTTTGCTGGCATCAAAACTATTTAAG
ACAGACTACTTCAAAGAAAAGCAAAACTTGAAGAAAAGCAAAGGATCTAAAAAAAATGAAAAAAGTAAATGATGCAGGA
GAAAATGAGGAAAGCAAGGAAGAAAAAGATGATGAGAATGAGAAAACTAAACAACAAATGACAAAAAATGCAGTCCTAC
ATCTTAAAGGAATGAATCCAGAGACCAACCGTGAAGAAATTAAACAATTCTTTGCCCCACATGGTGATGTTGGATGGGT
TGACTTTGACAAAGGAGTAACAGAGGGTTATTTACGACTAAGGGAGCCAAACAGTGCTGCTCCAACACTTGAAAAGGTC
AAAGCTGCAAGGGATGGAAAGATTATCATTCATGAGACTGAAATTGAAGTCAGAGTAGTTGAAGGGGATGAGGAAATAG
AATATTGGAAAAAAATGTATAGAGATATTGCAGAAAAACAAGATAAAAGGAAAAAGGGAGGTGGCCGAAGTGGTGGAAG
GGGAGGTGGCAGAGGCGGAAGAAATCAAAGAGGAGGGCGTCGCACAAGGGGTGGACCACAAGGAAAGAGGAAGCAAAAC
AAAAAGAATGAAGATGAAGACAGTGATAATGAAGATGCAGATGATGATGAGCCAAAGACCAAGGTGTCCAAGACTGGAG
ACGACTAGTGAAGTAAATGAAAACAATTTAGTGGTAGAATGTGATTCTGGATGGGCTTAAGGTTTCTCTTATGTGATTA
ATATTTATTATATCATATTGGAGCATAGTTGAATGGAAG
>00089 6 reads, 1269 bases
GGACACACCGAACCTTTCAGGCGYMAYACTGCAGTWTGTAGTCGTKCTGCGATWTTGTTATTCAAAAGCTTTTCATAGA
AGATGTCCTCGTTTTCACAACGACTAAGTTCCCTTCTCGAGGGATCATGTGTGGCATTCGCCCTGAGCCTGGCCAAGGA
CACAGGGATCCTGCAGGCACTCATTGATGCCAAACAACCCCTGTCATCAGAGCTGATTGCCCGAGAGAACAACTTGAAA
GAGAGATATGTTCGGGAAATACTTGCAAGTCTTGGGACGGCAGAGCTCCTCCACATTGACACGGATGAGACGGGCTCTC
TGACCTACTACCTGGAAGAAAATGAGAAAAAATCATTGGCATCGGCTCTAATGGCTTTYATCTCCTTTCCCAAAGTTTT
TGGTAACATCTACGACCAAGTGAAAGCTTGCGTCCCTGCAGATGGTCCATTTGCGAGTACGTTATTCAGAAAAGGTCCA
TGACATCATTGATGAGTTCACCAAGTATTTAGTAGATGGCTTCGTGGATGGTATCTTAAAGTTCACAGATGGTCTCCAG
CAGAAACTTGAGGCCGGCATAGATGTTATCGAGTTCGGAAGTGGGCGTGGTCGACTTCTCAGCAAATTCGCCACCATGT
TTCCCAACAGCACATTCACAACATCAGAAATCTCCCCCGAACTCCTGGACTCGATAAGAGCCAGATGTGGCCACATCCC
CAATATAAAATACGAGCTCATAGATCTCTGCACTCTTCCTGACGTTGTCGCCAAACAGTACGACTGGCTTTTCTGCTCT
GACGTCATTCATGACCTTCCGAATCCCTTCAAAGCGGTGGAGGGCATTCGGAAGTTGGTCAAGGCGCCCGACGGCGTGT
TTACGTTTATTGACATGGCGACCTCTGGAAGTCCAGTCGTGGACAGAGGGAACATGGAAGTAGCCTCCTATTACGCGGC
TGGGACATTCTTGTGCATCCCTGAGAGCTTCCAGAGGCCCGACAGTTTGGCGCTTGGACCATGCTGGGGACAAAAGAAA
GCTGTTGAAATAGCATCATCAGCGGGATTCAAGGTGAAGGACGTCAAATTTGAGAGCGGGCACCAGGCTATCTACATCT
GTACACTTTGAGATAACGCGTACCAAGTTTTATGTTCCAAATATTCAAACCAATGTTTTTGTATTAAATAAAATAAAAA
TTTAAAATACATGTAGTTACCCATTCAAAAATTATGAAATGACATATATTTTAGCTATAAAATAATGAGTCGGTTTATT
GGTAT
>00090 6 reads, 1179 bases
TTCAGAGTTGTCTCTTTGTTTGTTCTACTWTCCCTGTTTCCCTTGGTCCACTAAATTCCAAAGCTCTGCACTACTTTCC
GGGGGTCACGTGCCTTAGCAACAACGGTGGCCGCCCGGAAATGACTAGCCGCCATCTTGGCCACSATTTAGGAGTAAAT
GGTTGTTAAAATTTTGTTTAAGATGTGTAAAATATATTTTTTGTTAAAAAATTGGTATTTCTTGTACTACAAGTCACAA
TTTTAAGTGCCAACTTTTTTTATTTGACACTACGCTCTCCACCCTTAAAGATTAAAAAACTCGCACTTTTCATTTTCAA
TTGTCAATGTTATGAGAGCAAAGTAAGCTGTCGCTTTCAAGTTCATCCTCTACGTAGTTTGTAGATTAATTAGAGCCTA
GGAGATAAATACCAGCTAGAAAATGTCGTCTTTTAAGAAAAATAAAGTACAGAAAATTCATCGCGAACGTCCACAGCCT
GAAGATCGAGCACATTTAGGGATGTTAGAGAGAAAAAAAGACTATAGGGAAAGAGCAAGAGATTTTCACAAAAAGGAGG
ACACAATTAAAAAACTTAAGAGAAAAGCTGAGGATAGGAATCCAGATGAATTTTACTTTAATATGACAAGGACGAAAAA
ATTGGATGGAGAACATAGTTTACGAGAAACAGCTGAACCTGTTGTGACAGAAGAGCAGAAGAAGTTGATGGCAACTCAA
GACAAAAGATATGTTTTGTACAGACTTTCCAAAGAACTTAAGAAAATTGAAAAGTTGAAGAAAACTCTTCACATGATTG
ACAGTGATCAAAAGAAAAATTCACACATTATCTTTGTAGATTCTAAGGAAGAGGCCAAAAACTTTGATGCTGCAAAATT
TTTCGACACTCATCCTGCATTTGTAGACAGAGCTTATAACAGACCGAAGTTGGACACCCTGAAGACAGGAAAATTTTCC
TTCGATGTTGAACAGTTAGAGGCTGTGATGGAATCTAAGGATGCTGCATACAAAGAAATGACGAAAAGAATAGACAGAG
CAAGAGAGTTAAAAATTATTGCAGATAAACTTGATGCCAAAGTACATGCAACGGATAAATCAAGAAAGAAAAAGTGTAT
CCAGCAAGAAACAAAGGAGATGGCTGCACAATACAAGTTTTCCTTCAAAGATCGGMAGAGCGGTTCAGCAGGA
>00091 3 reads, 1284 bases
AGACCCAWTAYAGTYAMTSAGCAGCCAAAATAAAAATTTGACATGGATGAAACCGTAACTCCGGAAAAAGTGAAAAATA
TCCTTTCTTCATTTCTCATTAAGTCTAATACATCTTCCGATGAGACGACGAGTGATGACATAAATACTAAACAGAATGG
AAAAGAATCTGATGCAAAAATCAACAGTAGCAATAGCAGTACAAGTGCCCTGAGAAGCCATTCTAGTTTTGTACAGCGT
CTAGATACCTTCTCAGCATTGACATGGTTTAGTAAGCCTGTTGATCTGAGCCCACTTATATGTGCACGATATGGTTGGG
AAAATGTTGATGCTGACATGCTACAGTGTGTAGGCTGCAAGGCATTTCTCTGTGGTCAGCTTCCTGCTAAGTCAGATTT
TGAAGCTTATGAAGAAAGTTACACAAAGTTAAAAAAGAATTTACTGGCATCACATGATAAATTTTGTGTTCTGGCTGCT
TATCCATGTCCAGATAACTTCTGCCATGTTCCATTGGATGATCCAACTTCTCTGGTCAATGGTTTTATTGAGAGAGTAA
AAGCTTTGACCTCCATTCAAAACAGACTTCCCAGTATTAACGTCACCCAACTTCATGTCTATAACTATGATGAGGGCCA
AGGAGGTGCTTACTGCAAGCGACATTTGATGCCTGACCATGATGTCTCTCCAGAACTTGCTACACTAGCTTTCAATGGC
TGGTCTTTCAGTGGGTCAAGTGAGGATGTCCTGATGTGTTCAATGTGTAGGAGAAAAGTTGGTCTGTGGAACTTCCAGT
CTTCAGTTTCTCACTCACTTGGTCAGGACACGGCTGAAGAGGATGAAAATGTTCAAGATAAAGAGGATGATCCAGGGGA
TCCTCCATCAAAGAAAAGGAGATCCATGCCTTTACATATCAAGCAGAAATTTGACCCAATTGATGAACACAATCACTGG
TGCCCCTGGATACAGCCAACTGCCGTGTCGCTAATACCCACTGCAACACCCGCATCACCTTCCACCAAAAATAACAGTT
CTGGCAGTGAAAATGTGCCCGCCTGGATCGCAGCACTCAGGACAATGGCCCCAGGTTTGATGGACAACAACACTGGACT
GGCGAGCGCAATGAAAACTAGTCCTATGGTTGAAGGTCTCCGTTGTTTTAGACGTGTCATGAAGTCTTGGTCATCCCCT
AAAGCTCAACATGTAACATCGCCACAGCTGTAGATAAAAACTTGTTTCAGGTTCTAACATCACCCACCTCATTATTCTT
AGTTATAAAACCAGTGAATT
>00092 16 reads, 1154 bases
TTGTAAGTAAAGGTGTCAAAGATGTCATTGCTATCAGAATAGCTTCCTCGGTCCTGATGGTCCTGCTGCCTTGGTTTGG
GCAGACGTTGACGTAATGATCAAACAGTTCACTGGGGTCATCAGTCTTGATACTGTCATCAGYTTCAACACTGGCCTCC
AGACCCTTCAACCCACCAAATACAACAACAGCATGTTTGAATTCTGTAATCTTCACTTGGTTGATATCGCTCCCCCTCT
CTGAGGTACCAATGGTCAGGTCATAGCCGCCATCATACGGTGACTCCGTGAAGACTTCACTCAGGCTGTCGGCCAGTCT
GACCGTGTAGCCCCAGTAAATCCCAGCTACTTCTCTTGGTTCACAAGGTGAGACGACGACGCCTTCAAGGTTTTTCTTT
TCTGTGTTTTGTTCCTTTAATTTCACAGTCACTCTCTGTCCAGGCTTTATGCTCATGTTTAGAATCACATCCTTTTTCA
AGCCAATGTTAGCATATGAGCTTCCCTCTCGCTTGGCACTGACAGGCTTTTTCAAAGTGATTCCCTCCCTGTACTCACA
GACGTCTGACTCACGGAGATGATGAGGGATGTCCAGGGGATTCAGAAGACCAGCATGGACAAGGTCTTGGTGGTAAGGA
AAGAACATCTTCCTGAGGTACTGAGGACACTCCAGGTACTGGAGGATGTGGAACAGCTGGGTGTTGCCGTGTCCAGGTT
TCTTCAGACCACTGAACTCTGACTTGTCGTGCTTTGTTTCATTCATCTCATCAAAAATAACTATTTCATCAACGTTGAA
GATTGCAGCTGCACGAGCTATCTGTCCTGCCAAATAGGCTCTCAGTTCCATGGATTGTGCATTATCCAAGATGGATCCT
GGCAGTGCAATAGAAATTGTGTACATCCGACCACATCTTTCTTTTTTCTCTTTCTCCTCCTCTGCCTGCTTAACAAGCT
TTTCCTTTTCCAATCTGATTTTTTTTTCTTTTTCCATTTGAACAAGTAACTTTTCCTCTCTCCATTTTCGTTTATAAGC
CTTTCTCTCTTTGTTTGAAAACTTTTTTTCTTTCAGTTCTGTTACAGAAGCGGGTGTCCTTTTATATGATATTTCTTCA
TTTTTCTGGTCTGAACGTAATAGTTTTCTTCGGTAATAAAGTGAAAGT
>00093 4 reads, 1200 bases
AATAGGGATAAAAAAAAAAAAAAATTTTTAACGAGTAAAATGCTTTTAATGCTGAGCTCCTAACAGCACTTAAAAAATT
AGGAACATTTCATTTTAATGATAAATGGTGACGTTTTTATTACGTCACTGGAGCTGCCAAATAGGAATGTCACAAAACA
GTAAAAGTTTTTTGTCATTTTAGGTTCATGTCCTTAACTTTAGTTTGTCCCGTAGTCTCCAGCCGAACACTGGGTCATG
TGGTACATGTTCAGGTGCCGCCTGAGGTCGTGTAGGCAGAGAGCTCCCACAAGAACTTCAGACTGTTGTCCTCAACGTA
AAATTTAGACTCCAGGACATCATGAGTAACCAACGGACAGTTCCCCGACAGGTTGACCGTTGCGTTGAGGGCCACCTCT
CCACCTTTGGAAGGCTTGGGACACTTGCAGTGGAGACTCCACAACTCCGCGTGCTTGCGTGTCCTTGGGTTGAAGAGAT
GACCAGAGCCCAGCAACATGATCGGCCACTTCTGCTGTGCCCCGTTGGTGCCCTCGGATATGAGTACCTGGACCTGCAG
GCTGTTCTCTTTGACCCACAGTCTCAGTCTGATCCTGTACGACTTGTTGCGCATGTCAGTGACGAAATCGGTTTTAATG
TCCTGCTTGGTGGAAAAGAACTTGCGTGCGTTGTTTATCTTGCTGATAGATCCTCGCTCGGGGAAGCCCAGTATGTCCT
CTGTCAGATTTAGGCTACTGTTGGACCTTTCGATCTTCCGACATCGAACACCATCCAAGTAAGACCGGCCTTGTGGGAT
GGTTTTGGGGTACATGTCTTGTATGAGAATCCCTGCGACTGGAGTTCCGTTAATTTGTGCTGGCTCCGAGGCGGGCGGT
AAGAGACCTTGAAAATCYGATCGCATGGTGATTCCGGACAGTTCTTTCCCCTGCTTTTTAGATTTCTTTCTCGTCTCTT
GCCACTTTGAATCATCGTCCTCTGTGACTTTATTCGCGTAGTCCGGCCACTCACTATGTTGAAGTCGTATTTCTTGTTC
CCAGCTCTGGTTCCCTTGTGGTGACCAAATCGAGGAAATACCGATCCTTTGCTGCTCTGCTTGCCAGATGTGGATGAAC
TGGTCAGTTGGGATGTTGTGACTCTTGGCCTGCTCCAAGGCTCGAAKAAWGTCCWTWCTYTYWWCTACTTCTGGCCTAT
AACACATCTTTAAAT
>00094 11 reads, 1286 bases
TATAATTGAGAGCGCAAGAAGAAAAAAGATTAAAGATAATTTCAGAGGCTAATTACTAACATAACTTATCAATTTATCA
CTATATGCACTATATTATACTAAAGACTAAAGAGAAGATTATATGCGTTATTTACTCGGCAGTAACTTCAGAACAACAA
CAAAAGATACAATAACTTGTAAATGGAGCAGTATAACATTCTTGGAAGAATTGGTGAGGGTGCTCATGGTATTGTACTG
AAAGCTAAGCACATTGAGAGTGGGGAAGTCGTTGCTTTAAAAAAAGTACCACTTCGAAATCCAGAGGAAGGGATTCCCA
ATACAGCTTTGAGAGAAATCAAAGCACTTCAACAGATAGAGAATAATCCTTATGTTGTCAGACTTCGCGAAGTTTTCCC
ACATGGCTCTGTGATTGTATTTGTGTTTGAGTTTATGTTATCAGATCTGTCTGAAGTTATAAGAAAAGTTGAGAAACCT
CTAACAGAAGCACAAGTAAAATCTTACATGTTGATGCTATTGAAAGGCATTGCATTCTGCCATGAGAACAATATTATGC
ACAGAGATTTAAAGCCAGCAAACTTATTGATAAGTTCTACTGGGCATTTGAAAATTGCAGACTTTGGATTAGCTCGTGT
ATTTCAAAATAAAGGTGATCGGCAATATAGTCATCAGGTGGCTACAAGGTGGTACAGAGCACCAGAGTTACTATATGGA
GCCAGGAAATATGATGAAGGGGTTGATCTGTGGGCAGTGGGCTGCATATTTGGTGAACTCTTAAATAACACTCCCATAT
TTCCAGGTGAAACAGATATTGAGCAGTTGTGCTTGGTCATCAGGGTTTTAGGAACACCAAATGAAAAGACATGGCCAGG
CATGTCAAAATTAGATCTTCCAGACTTCCATAAAATCTCTTTTCCTGATAATGCACCTATACCATTAGAGGAAATTGTT
CCTGATGCTTCAAAAGAAGCTCTAGACCTTCTCAAAGAATTTCTTGTATATCCTAGCAAACAGCGAATATCAGCAAAGA
AGGCATTGCTACATCCATATTTTTTCACCGAGCCTTTGCCAGCCCACCATTCTGAATTGCCCATTCCACAAAGAACAAG
TCGTAAAAGTGGCCTACAACTAAAGCATCAAACGCATGAATATAATCTTGATATACCTGTAACAGAGTCACTTATTGAT
CCTTCTTTGTTGGCTCCACAAGTTGCTTGCTTGTAATGATTTACATGTATTAAATTGGCTTTGAATARAWMGGAMTTCT
AAATTCTTAATTTAAATCTAAG
>00095 6 reads, 912 bases
TTTTTTGTTTGTTTTTTTTTTGTTGTTTATSWWWTCCTTGTACTTATTGCATATGAATGCTATTTTATACAAAACAATA
AAATGACTAACTCTCAAAACGAAGCACCCCTTATTATTAATGGATATGCAGTTCTACAAATAAAAACAAGTGAAAGAAG
CCACGCAACCCACCATCTTTTCATAAAGGAGCATGTTGCTACCCACCAATGTACAGAATGGCCTCAAGGAAGAACACTT
ATTGTGTATAATGTACCACCTTTCTGCAAAGAGGACAATTTGAGAGTACTGCTACAGTGTTGTGGAGAAATTTTAAGAG
TGTTCATACAGGCAAAACCATCATCAGCTCCAGTAAAAAAAAAGTTCGTTTTTGATTAATTCTAGCAAAAAGTCAGCAC
AGGTGGCCTACATAGTTTTTAAGAAAGCCAGTGGTGTGAAGAATGCCTGTAAATTGACATATGACCAGATTCGACACAT
GTCTGATGACAAGACGGTAATAGTCTCTGGGTTAAGAGCATACATAGAGGATTACAAAAACATACCTGATGTGTCCAGA
TTAGAAAAGGAAGCTGAAGCCTACATGGCTGCCTACTACAAGAGAAAAGATGAGTCAGATAAGAGATATAAGGAGCAGG
CTGGGCTGCCAGACGAAGATGGGTTTATAAAGGTGACGCGGCATGGCAAGAACAAGGGCACCAGGAGGACAGAAGAGAC
ACAGAAGAAGGGCCATGCTCATATACAAAAGAGAAACATAAAAAATGAGCTGAAAGATTTTTACACCTTCCAGTTTAGA
GAAACAAAGAGGAGTTATATTGCAGAGCTCCAAGCCAAATTTGAAGAAGATAAGAAAAAAGTGAAAGAAATGAGGCAAT
CTAGAAAGTTCAAACCATATTGATTTGGACATTTTAAGACTTG
>00096 2 reads, 967 bases
CTTTATACCGACGTGTTCTGATMKMKAWYSGAGTACAGAGTGTATACGAGGATGTAGCAAGGGACACAAACAGAGGACA
CACTGTAAAAGCTGTCTGTGAATCATTTCAAATGTCCAAAGATGCGGGGTTCAAAGTTGTCTCCCATATGATGCCTGAT
CTTCCCAATGTGGGGTGGGAAAGAGACATTGAACAATTTATTGAATTTTTTGAAAATCCCGCTTTTCGGGCTGATGGTC
TCAAAATTTATCCAACACTGGTTATTAGAGGCACAGGTTTGTATGAACTGTGGAAAACTGGTCGATACCGGAGTTACCC
ACCTAGTCAACTTGTTGATCTCATCGCTCGTATATTAGCCCTTGTTCCACCATGGACAAGAGTTTACAGAGTGCAAAGA
GATATTCCCATGCCTCTGGTGTCTAGTGGTGTTGAACATGGTAATTTACGTGAGCTTGCTTTGGCCAGGATGAATGACT
TGGGAACACATTGTAGAGATGTCAGGACAAGGGAAGTGGGCATTCAGGAGAYTCACAACAAAGTTAAACCAGACCAGGC
AGAGTTGATACGGAGAGACTATGTTGCCAATGGAGGCTGGGAAACGTTTCTTTCCTACGAGGATCCTGAACAGGACATA
CTCATTGGGTTATTAAGACTTCGCAAATGTTCACCTGACACATTTAGGCCAGAGCTTAAAGGGGGTTGCTCAATAGTCA
GAGAGCTGCACGTCTATGGAAGTGTTGTGCCCGTTCATACAAGAGATCCCTGCAAGTTTCAACATCAGGGCTTTGGTAT
GTTATTGATGKAAGAAGCAGAAWGGATAGCACTGGAAGAKCATGGTTCTWGAAAGATTGCTGTCATATCAGGTGTGGGA
ACAAGAAACTATTATCGCAAAATTGGTTATGAACTAGAAGGACCTTATATGACAAAGATTCTTGTTTAATTTGCTTTGT
GAAATAAAAGAGTACAAAA
>00097 4 reads, 1371 bases
ACAGTGACACCTGCAAGTTCAGGCTGTTGTATTGTAACCTTCAACATTGACCTAATTAACTCTAAATATGAAAAGATTT
GCTATGCTGCTGGTACATCAACCTTGACAACACATCCAAGACCAGTGGACCAAGCTCCCTTGAAAAATGCTGATGTTCT
TATACTGAGTTGTTTGACACAAACACCTTTATCACTGCCTGACCCAATGATAGGAGAGTTTTGTGTGAATGCAGCTGTG
ACAGTAAAAAATGGAGGCAATGTTCTTGTTCCGTGCTATGCATCGGGTGTGACATTCGATCTGTTTGAATGCTTGTCTG
GCCATCTTGAACAATGTGGGTTGGCAGGCGTGCCCATGTACTTCCTCTCACCAGTCTCAGACAGCACACTGGCATATTC
CAATATATTTGCTGAATGGTTGTCTTCTGGAAAGCAGGCCAAAGTGTTTCTGCCAGAATGCCCTTTCCCTCATGCAGAT
CTTCTCAGTAAAGGTAGATTAAAGAATTTCTCCAGCATACATACTGGCCTAACTACAGACTTTCACACACCCTGCATTC
TATTTGCTGGACACCCCTCACTTCGCATGGGTGACATTGTTCACTTCATTGAACTCTGGGGAAATTCCTCTGCTAACAC
CATCATTTTCACAGAACCAGATTTTCCTCACCTTGATGCCCTTGCTCCGTTTCTCCCCATTGCTATGAGGGTTTGTTAC
TGCCCAATAGACACAAGCTTGAACTTTTCACAAGCCAACAAGCTCATTAGAGACTTGCGACCTCTGCACCTTGTTGTAT
CTGAACTATACATCCGACCTCCTCTGATGGAGCCATTGCGGAACGACCTAACTATTGATTTTGACCCATCTCCTTTAAC
TTACAAGCAAGGAGAAATCTTGTCACTGCCTGTGAAAAGACAGTTTGAGACAGTGGAAATGGAACCTGAGCTAGCAAAT
ACATTGGAGCCTATTGAGGTGAAGCCAGGATCAGCTGTCTCCATGGTAACAGCTGCACTGGTTGCCAAGGACAACAAAT
ACATATTACAGAGACTTCCATCTAACATTCATATGACTAGGAAGCGTAGATCTGATGGCAGCTTAATGTGGCGCAATCC
CTACATATTTGGAACTCCAAGCCTGCACGAGATCGTTGATGCCCTCAAGCAGTATGGGTTCAATTCACTAAAAGTTGAA
GAGAATGAATCTGGATCAATCATCCATCTGGTAAAGGAGGACTCTTTGATTCAAGTAGATGGAAATTCAACACACATTA
TTTGTGACAGTGAAGAAATTCGCCTGAAGCTTAAAGAAGTTATGCTTAAWTGTTTAAWACWATTGTWAKCTTWWACAYA
GAGTATATAAAATATCCAAGTCCAAGCG
>00098 11 reads, 1431 bases
AAATCTATAACAGTTTCGCATGTCTGCGAGCCTGTCCTCCTCTAAAAATTTGAGGCGTAACTTTTCTTCGAAGTCAAAA
TATGTGAGGATCTCTTCCTGCTCCTGGAGCTCTTTGACCTGCTTCTTTATCTCCTCTATCCTCTCATTTTTCTTGTACT
CCTCCATCTGTCTATCAAGCTCTTTCCTGCGCTGATCAGTCCAAACATCCAGTAGGGACTTTTGCGCTGAAATGTCTAA
AAGTTCAAACTGACTTAAGTTTGAAGAGACTATGTTTTCTACTGCCTTAACTAAATCGTAGTCAGGTAAAAATTTTCCA
CCAGACGTCAAGACTTCTTGAAGCCTGGACAGCTCAGACTGATACTCTTGCTTCTCATCTGTGGTGGGTAGAAGCCGAT
GAATGACATCATCAATGGTTCTAAGTGCAAGTTCTACTTCAGGCTCATTCGGGTCACGGGCTTCCACTTTCTCTAAACT
CCCTGAAAAATACCGCAGGGCTTCTTGTGAGATAACACCATCAGACGAACCAGCAATCTCCTTCAGTAGTTTTAACCCT
CTGGRAAATTTATGATAAATGCCACTGCCGATTATTTTCAGTGAGTTACGGAGATCATTTGGGAGGTTTATAGACTGGA
GATTTCCTAACGCAAGGAGCGTCTTCCCAAGGAGAAATCTTTCATCCTTGATATCAAAATGATCGTCGTAATGCGGAAA
TTTGATGTACTTTACCTTAATCCACTCCTCTTCCTCCCCAGCAGGTCGCTCTATCGGAGGACATGCCAGCTGGTCAAGT
TCGGAGGACAACAAATGCCGTACTGAGGCGTAGAGACACAACAACGCATTAGTTGGGTTTGAAAAATCTTCCTGAAGCA
TAGAGGTGTATGAGATTTTGGCAGCATCAGCAAAGTTTTTCTGTTTGATTAACCAATCTAAAGTTATGTTTAAAGTATA
GTGGTTGGGAAATATTCCATAAGTTTTCAAGTCTGTGAGAAGCTTTACAAGTCGATGTCCATGACCAGCAGATAAAAAT
CCTAAGGCAACAGCATGGGTTGTTGAGTCATTGCGTGGTATACTGGTCAGACAGAAGTTGAATTTCGTAAGCACATCCT
CAATAAATTCAACCTCCTCTTCTTCCATTGCATGAAGCTGGTGAGCCAGAACATTCATGTCAACAGCGGAGACATTGCC
AGACTTCTCAAGCTGATCTCTGATCTCAAATGCAAAGTCACTAAGAGAAACCTTTTTGAGGACGGGGTCTTCCATGTAT
TTTTGCCATGYTTCTCTKCATGAAKAGGCCTYGGAAAGCAAAAATCGTTTAGATGTAACGTGAACTGCACCTTTACCAA
AATTTAGCAACTGTTTGGTTGCTCTTTGAACGAGTCGCAAGGACGCTGCCATTTTGTATACAGGTGCAGCATGAACAGC
TTGTACCCC
>00099 8 reads, 1386 bases
TTTTTATGATTCAGATATTCTTATTTATTCTTGACCTTATAAATTATAANTANGAAAAATGTTTTAAAAAATTCCCCAA
ACTAACTTTCCAAGACAATAATGACTTTTCACTCAGCACTAAACATACAAGATTCTCATAAAGCCTTCTTTTCAACATT
TTAAAGATTTTTTGGTTTTTTTGATACACGCAGTATAGATCAACTCTTTTTAGCAGAAATTTCGTTATGTTCTACATCC
GTTTCACTGGGTCTCAGTTCATTTTTTTTATCAGGTTTGTCCACTGATGTGATGCCACTATCAGATTTAGTTGAAGCAG
AGTGTATGGGAGAGTGGTCCTCCGTTTCTTTCATTTCACTGTCTAAAGAAGCATTAGCTGGATCAATTGTCTGAGTGCT
CTGCGTATCTGAATCTTCCCCAAAGAGATCATCAAATGAAATGGACTGATCATTTTTGGATGAGCTTGTTAGCAACAGG
CTCAGCTTTGATTCCAAAGGCTTTTCACTGAGCAGTAACGGAAAACGATGTTCTGAAACTTCCTGCGATGAGGAAGAAA
ACGATTCAATTTTAAGTGCTGCCTCAGCCATGGCGTTGGTTAGAAGGTTCAACTGTTTGAGCCCGACGTTTTTGCAGAT
GTTCAGGCTCACGCACAGCGGGTTTTCAACGCACACGGGGCGCGAGTCAACTGTTTTAGTGAATGTTTCCCCCTCCGTG
ATAGAAATGGCTTTGTTGGCGAAATCAAACTTGGAGTAGAACTCAAAGAATCCATGAAGAAGGCTCTCTATTGATTGAT
TATTATCAGACTTGGGGATTAGGGCTGGATCACTTGGCAGGCCAAACATAATGTTGTCTATAGAGAAAGTCTCAGACCG
ACTGGCTAGGGATTGCAGCTGTCTGAACGTGGGCAACACAGGCACAGGTCTCGTCTGGAGATAAAATATCAGCATGGTC
AGGAGGCCTATGGTGGTTGGCTTCTGCTGCTCTCCGCTGGAGGTCAGATCGTGGCTGATGGCCCACTGTTTGATGGCAA
ACATCAGTGGCCTGACACGGGGATCTGACACTGACAGGAGGTACAACAGCTCGGTCATCTTGATGCTGTCTATTGCATG
AAAGCTGATATCACACAGTAGGTCTACAGCGCTGTGTTTGAAACGAATTATTGGAACTCTAGCATTGAGTATCTTCATC
ATGTTGTAGACCCGCGGACTAAGCTCCATCAGTGCAGCCACCATGGTTAACGTTCTTTGGGCCAAATGTCGCTCGGATG
AGAAGATCTCCGTCATGAACTTGAACTGAGAGGATGAGTTACCTCCACTTGGTTTGCTTGATGTGTGCAGGTCATTGTT
GAAACATAACATCATATCCAGATCACTGTTCCACCAGCCAAAG
>00100 2 reads, 1301 bases
TATTGTCCCATTACTTTTGCAAATGGCTGCCAACTTGAAAGAGATTGTAGGAATATATCAAAAWTTAAAACGTGTCTGG
GATTCAAAACCACCAAATTTAGAGAAATCTGGAGAATTGCTTTCGAAACTTAAACTCGCCCTTACTCAAGTAGCATTCC
TGCCAACCAATGAATCATCCGTGTCTAAACAAGAACTGCTTATTGCCCGTGACATATTAGAAATTGGAGCGCAATGGGC
TATAGCTAAAAAAGACATCCCGGCTTTTGAACGATATATGGCTCAGCTAAAATGTTACTATATGGATTATAAAGATGAT
CTTCCTGAATCCACCTACAAGTATCAGCTTTTGGGACTCAACCTATTGTGTCTTCTCTCTCAAAACAGATTAGCTGAAT
TTCATACTGAATTGGAGCGTTTGCCTGTAAAAGAGATTCAAAACAATGTTTACATCAAACATCCAGTTAGCATGGAACA
GTATCTGATGGAAGGAAGTTATAACAAGGTTTTCTTGGCAAGGGGAAATGTACCAGCTGATAACTATAATTTTTTCATT
GATATTTTATTAAACACAATCAGAGATGAAATTGCGGGTATGTATAGAAAAGGCATATCACAGAATTGGTCTCTCTGAA
GCTGCAAGAATGCTTTTCTTTGATTCTCAGAAGCCAATAAAAGATTATGCTACAAAGCGCCAATGGAACCTACAGAAAG
ATTTCTTTTACTTTATCCAAGAAGCAAAAGATGCTGATCAAACTATCCCAGCCAAGTTACTGGCACAGCAAACAATTGA
ATATGCCAGAGAATTAGAAATGATAGTTTAGTCATCACTAGAAACTTTGTATGATTCCTATTACAATTTAAATCTGTTA
CCTTGACATGACACAAGCTTCACTTGTTGGCTGAATAGATCTACCTACACGACCTACACCTTTGGTCTTTTCATTTACT
TTAGGCTTATTAATATTATTTAAAAATTATATTCATCAAGTCAGCAACTTTTAACCAAACAAATATATTGATAAGTCCT
GCTTTATCGAGTAAGCTCCTATTCCAACCAACTTTGTAATGAGATAGTAAACCTTTAACTAGCCATGAASSAAGTTAAT
GGACTAGCATTGGGNNNNNNNNNNTGCCATTACAGGGTACTTGATTTTTTAAAATACACACTAAGTCACATATTGCTTG
TCCATGAAGTTTGTTTTATTTACTCTATTTAATTTTTAAAATGCCATTGTTAATTTTCGTCATTTGCCTTGATTTTGGT
ATTTAAATGTCATATGAAACCTTTTTTTTTTTTTTTT
>00101 15 reads, 1159 bases
AGACCTCGTCTCGAGAAATATTGAAGACGAGAATACTTCTTTAAAGTTTTCAATAAAAATCCTTGGTAGGTAGGCTACA
AGGATATACAGCTGTGTAGGTTCAMTATAAGCCATGGCAGGTTTTCCRACATGTCTGTTAATGACTTTCTGCGTGTGCG
TCTTTTCTGGAGTCGATGCTGTTTGTTATTATGACTGCATTGACGAATATGTTAGATTGACAATGTATTACACCATGGA
CAAGTCGGCCTACTTAAAGTGTGGGATGAGGATTCAAGATCCCGGATACTCTTATTATTGGTTTAAGCTGATGCCAAAT
ATTCGTTATCAACCCGCTGACGAAGACCCAAATGTAGCAATCTCTGAAAATGGGAAAGTTCTAACCTACAACTCATTCA
CACCGGAAATAAACTCTGTTGAATTCAAATGTGACATTTTAAACCGCACTGACTACATGCATTCGAAAATGTTTCGTCT
CCGCAGGCCTAAACTAAGTCAAACCACCAAGATAGGGGAACMAACATCMTACCAAATTCCACGAAACAGCTATCTGTTT
ATGCCMTGCACGTTCCAAGGTMACTTTCAGGGKGACGATTTACAAGTTTCTTGGTCAAAATTAAGAGATGATACTTTTA
TTCCACTTCCCGATGACTCAGATCGTCAGTACATCGACCTCTCAGGAAATCTGCATTTTACAGCAGTTCTAGAATCGGA
CTCAAAAGATTACTTCCATTTACCGTATCGCTGCGATGTGTTCAGCCCGGCATTGTCACGCGGGGAATATGGAAACTAC
GCTTACATAAATGTTATGGATGCTCCGTTGACTTATARTGTACCACAACTRAARTATAAGTCTAACGATGTCAGGGCTG
ATWTTGGTGGGGATGCCATTCTTGAATGTGTCTTCGAAGACAATACTTTGAATGCTACTAGTTACAGATGGTACAATCC
CGAAGGTGAAATAATAACGACTCAACGTCCCAAGGAGTATGAAATCTTGTACCAGGGCAAAAGATTGATAGTGCACGAT
TTAAAAATATGTAAACATGGAGCATATTATTGTGAGGCCAGTAATTTCATGGGCACCTCAGAAAGACATTATATTATTG
TTAAACTTTATTGTCAGAATTAATAAACGGCGAAACTTTATTATAACTTGTGA
>00102 10 reads, 1278 bases
TGGGTRAKAWTGGTTAGMTATTAGCCTCTCCAATGCAGGCATGTACATAACAGCTCGAGTAGTTCTTAGCAAATTTCAT
TATATATTTCATGGTTAGGCTCATTCGTAAAAGTATTCCAAAATCGATCTTATTTAGCGCCGAAAATGTTTTATTCAAC
AATGAATGTACATATATAATAAATTTCTTAGTTTAATTTAGTTGGTGTTTTGAAAATACGTGAACCAGTGTTATTCACC
ATCGTATTGTGGCCGAGCTGCCTTTAGAGTGGTCATTTGATTTTAATACAATAACTCTGTTACCCATTTCGCTTTCAAC
CAAATCATCTTGTTCAAAAACTGAACGAAAGAATGTTGATAAAAGGATTGACGCTCACTATTGCGGCTGGCCTACTGTT
TGCAGGATATGTTAAGAGTTACACCAAGATGACAGAACATAAAGGACTGACAATCGGCCAGACACTTAACCTAACGTAT
GACTTCAAAACGTACCAAAAACGTAAAATTTTGGAGGAAACTAGTGAGAGTAAGATAAAAAGCGTTGAACTGAAATTCA
TTTGCGCAGGGTGTCCATCCTTTGCAAATGTCGCACGTGCTTTGAGGCTGGATAGAAACTTGAAACTTGATGTTGAAGA
CGCAGTGTCGACAAACTTCAACATCTCCAACGGCACGGATTTCTGGATCCGTCTGACTAAAGTCAACATGCAGACTTTT
CATAGTGGTGCCTTCAAATTCAGGATAAAGTTTACAGACAGAGGCGATTATTTAGATGTCTACACATTTGTAGTGGTAG
AAGCCCCTAAAGCTATCCAAAACCCAGGGGAATACTCGGGTCCACTTCTGTTTGCAACTTGCCTAGCTGTGGTCATCTT
AATCTTCGTGCTATTCCTGCAGTCATGTCGATTCCTCCGTGAGTTTAGGGAACAACAGGATGAAGAAGAGGAAGAATTT
ATAGAGACGCTTGCTAGAAGAAGGAGGTTTTACTAGTAAGAGATCGACGCGTTGCTGTTGAAAGCAGACATAAACCAAA
GATGGACGATGAAAAATATTTATCAAATAAAAAAAAWAAMWGATCAAATATTTCCTGAAACTGGATGAACAGCATTCAA
TTTATCAAAATAGCGAAAAATTTGGACATTTAATCAGTTTAATATAAAGAAGTTTTCTTTTTCAATTGATAAATGGTCT
TACTAATAAGAACAAGTAATTTGAAATGACATTTGAGGTAATCAACATCTATCCTTACCAGTGGGCGCACTCGAGGCTG
CATGCCTACTAAAA
>00103 3 reads, 1262 bases
TCAAGGGATGATCAAGTTTTATCACATCTATAATTTTGAATCCACTACAACACTAAATATAATATCAAACGATTCATTG
ACAATCCTAAAAAGTTTAACTTAAAGACTGAGTGAGGAACTAAACAGCATTCCTCTTAACATGGAGCAGATTTTTATTT
TTAAAAACATACTCGACCTGTGCTGGGAGCAAATTTATCATTTTAAGAAACAGAAGTCTATACAAAGAAAAGTCATAAG
ATATCTAGCCAGCTACAGAGGACGTCATAAGCTTCGAATGGGTAGTACTAGTACTTGGTTGGGCAGTGAGGCAGGTGTG
GACACTTGTGATGAGGGCGAGTTCAAAAGATTTAATAGCTGTAGAGCGTATTCTCTTTCTTCTTCATATTGCTCCTTCC
CTTCCAGAAACTGAATCCTGTCTTGAAGAAAACTTTTGAGCCCCAGTTCAGGCGTGCTACATTTCTCCCAGGCCTTGGT
GTGATCTGTGACTAGAGTCAGAAGTGCAGACATAATGTGTTCATGGGTTGAACCATGACTTTCCCCTTTTAACAGGGAC
ACCAGCTGTTCCACAGCACCCAAAGCAACTAGGTTGTCTTTAAGTGCTGGGTTAGAGTTGCAAATAGCGGACATTAGGA
AAGTGGCCTTCACCTTCAACTTCTCTTCTTCATTGCGAAGGGCCCTGAGAAGAACTACAAGGCCATCATGAGCTAGGAG
TTGTGTATGAGCTTCTGTGTTGCTCCTCACAAGACATGATATGGCATACAGTGCCTTAATTTGCACTTTAGGGTTTGGA
TCAGTGTCTGCCAACAATAAAAACGCTGGAAGTAGTTTCAAGGTTAATAAAGCTGTCTGAGCTGTAGGGTTATTTTGGG
CCAGGTTTCCTAGAAGCTCCAGACACCTCCATCTCAGCTCACTCACTTCACTGCTGAGGAGCTTGGGCACGATTCGTAG
TCCATTTATTTTGATAAAATCTCCTGCAATATCCAGATCCTCTGCCCATTCTTCCAGTTCTGATAGCGCTGTGATCTGC
TGCTCAGTCCCTGATTCAGTGTCTTGCTCTGCTTCTTCTATGGCCTTCAAACATATCATCATACGCTCCACCGGATTCA
CAGTCATGGATGTTAAAGCATTTTCAAGCCACTTTTTTCTTTCTTCTGTCAAGGGTTCAAAAATTTCTGAGTCAGTGGG
GTGAGGAGCATCTTCACTTCTTGTGGCTTCCATACAGAATCTAAGCAGACCCTTTATTAAAAACTGTCCAGCTTATA
>00104 2 reads, 1061 bases
GTAGACAGACTACCCTCTAGCTGGTGTGGCTAAATCTCAGCTACTCTCCTACATTGACCGTTTGGCTCACCGTAGCCAG
TACACGACAGGACGAGGCTCATCTGGTGTCGGTTTGACTGCGTCTGTTATGAARGRTMCCATCACTGGCGAGATGATGC
TTGAAGGTGGCGCCCTGGTGTTGGCTGACGAGGGCGTGTGCTGTATTGATGAGTTTGACAAAATGATGGATGCCGACAG
GACGGCCATCCATGAAGTTATGGAACAGCAGACCATCTCCAWTGCCAAGGCTGGCATTATGACAAGTCTAAACGCTCGT
GTATCCATCCTCGCTGCCGCCAATCCAGCCTATGGCCGCTACAATCCCAGGAAGACAGTAGAGCAAAATATTCAGCTAC
CCGCAGCTTTACTCTCCAGGTTTGACCTACTTTGGTTGATACAGGACAAACCAGAGCGGGACAATGATCTCAGATTAGC
TCACCACATCACCTATGTCCACCAACACAACGTCCACCCTCCTCTCACCTTCCAGCCCCTGGACATGAAACTGATGAGA
CGGTACATCAGCCTTTGTAAGTCCAAATCTCCAACCGTTCCCGAGTCTTTGGCCGAGTACATCACTGGTGCTTACGTTG
AGATGAGGAAAGAAGCTCGTAATAACAAGGACATGACCTTCACCTCTGCCCGTACGCTGTTGGCCATTCTGCGACTGTC
CACTGCACTGGCCAGGCTTCGATTGGCTGAAACTGTTGAGAAAGAAGATGTCAATGAAGCCATGCGCCTGATGGAAATG
TCTCGTGATTCTCTCAACTCAATACATACTKCTCACCCTAAGAGTACTAATCCAATTGATCAGATCTACCAAATTATCA
GAGAGATGGTTCCAACAACAGGAGTCAAATCTCTCAAATTATCAGATATCATGGAGTTGTGCACCAGTAAAGGATTTAA
ACCAGACCAGATCAATGTTTGCATTGAGGAATATGAAGATCTGAATGTGTGGCAGGTCAACACTGCCCGGACAAGACTC
ACTTTCCTCTAATKTGTCATAGAAACTTCTAAAC
>00105 4 reads, 1284 bases
TTTTCAACCGCGGATTTCACWGCSKCATGTACAAATTGTAAAGAAACAAGCCATTATTTTGATTTTCGCCCACAAGCTG
CGTATACAAATTTAGTGAAAAATCGAAACACAAAATGGGAATTACAGGCTTAACAAAATTATTGGGTGATCACGCGCCA
GCATCTATGAAAGAAAATGAGATAAAGAGTTTTTTTGGTAGAAAAGTTGCCATTGATGCATCAATGAGCATCTACCAGT
TTTTGATTGCAGTAAGACAAGATGGCTCACAGCTCACAAATGAAGAAGGAGAGACCACCAGTCATCTGATGGGAATGTT
TTATCGTACGATAAGAATGGTTGAAAATGGTATCAAGCCAGTTTATGTATTTGATGGCAAGCCTCCTGATATGAAATCA
GGCGAGCTTGCTAAAAGAAAAGAAAAGAGAGATGAGGCACAGAAAGAACTAGAAAAGGCAGAGGAAGCAGGTGATGAAG
AGAATGTTGAAAAATTCAGTCGTCGTTTGGTCAAAGTAACAAAAGAACATAATGATGATTGTAAAAAGTTGCTGACACT
CATGGGTATTCCTTTTGTTGAGGCCCCTTGTGAAGCTGAAGCCCAGTGTGCTGCCCTTGTCAAAGCAGGAAAAGTCTTT
GCAACTGGAACAGAAGACATGGATTCATTAACATTTGGCTCCAGTGTTGTACTTAGGCATCTTACATTCAGTGAGGCGA
GAAAATTACCTATCAAAGAATATCAACTTAGTAAAATGTTAGAAGATCTTGGCTTGACACAAGATGAGTTTATCGACTT
GTGCATACTCTTGGGATGCGACTACTGTGACTCAATTCGTGGCATTGGTCCTAAGCGAGCCATAGAACTGATCAAACAA
TATAGAAGTATTGAAGAAATTATTAAACATCTTGACAAAAAGAAATATGTTATTCCTGAAGATTGGATGTACAAGGAGG
CCAGAAAATTGTTTAAAGAACCGGAAGTTTTGGATCCTGCAGAAATCGAGTTAAAGTGGAATGATCCAGATGAGGAAGG
CCTAGTGGAGTTTATGGTCAACCAGAAAAGTTTTAATGAGGAGAGAATACGGAATGGTGCTAAGAAACTATTAAAATCA
AGACAAGGCACAACTCAGGGCAGAGTGGACTCCTTCTTTTCTGTAGTTTCAACATCCAAAACATCAAAAAGAAAAGCAG
AGGAGCCAAAAGGTCAACCCAAAAAGAAAGGCAAAGGATCTTTTAAAAAGGGAAAATGATTTTGTTTTCTGAGAAAATA
CTATACAATTTTAATTAAAC
>00106 3 reads, 1251 bases
GTCTTTACCTACTTTTACTTAACTATGATGACCAAATTGATCTGGATGAAGAGAAAAAAATGTATGAACGAATCAAAGA
AGAGAGGCTACATGTTCACTTCCCGGATGAAGTTGACACACCTATTGATGTACCAGCAAGAACACGATTTGCCAGATAC
AGAGGTATGGACAGTTTTCAGACAACTGTCTGGGATGCTAATGACTCATTACCCTATGAATATGCCAGAATATATAGGG
TTAGCAAACACCATTATAAACGCCTAAAAAAGATTTCAATGCAATTCAAACAGGAAGATGGAGATGGCAATAATTTACT
AGCTGAGCCAGGAAACTTCATAACAGTTTATGTGAAGAATGTACCAAAGACTTTCATTGAGTGTCACAGACCTGGTGTT
CCAGTGACATTATTTGGTCTGTTTAGCAATGAGCAGAAGATGACACTGGTCAGTACTCTCATTTCAAGAATTCCTGGGT
TCCAGAGTCCAGTCAAGGCTAAAGATCCTCTTGTGTTTCAGATCGGTTTTCGTAGATTCTCTGCGTGTCCAATTTTCTC
CGAGCACACTTTTCAGAACAAATTTAAGATGGAAAGGTTTTTACCTCAGCAAGGATTCATTGTTGCATCTATGTTTGCT
CCCATCATGTTTGCACCTGCTCCAGTACTTGTGTTCAGAGAAAATGTAATGCAGAAGTATGACCTTGTTGCCAAAGGGT
CTCTGCTGCCCCTAGACACAGACAGGATCATCATCAAACGAAGTGTTCTTAGTGGGGCTCCGTTTAAAATCAACAAAAG
ATCTGTTGTTGTGAGATACATGTTTTTCAGCAGAGAGGATATTGAGTTTTACAAACCTATTGAGTTGAGGACTAAGTGG
GGCAAGAGAGGTCATATTAAGCAGGCTCTGGGAACCCATGGTCACATGAAATGTACTTTCAATGGGCAACTAAAATCAG
AAGATACAGTCCTGATGAATTTGTACAAACGTGTCTTTCCTAAGTGGAGTTACGACCCCTCTGTTAACATCCTGCCACC
AATCATTGAGGAAGAAACTTCAGTAGAAGAAGAAGAAGAAGATGAAGAAATGGAGAAAGTTCCAGAAGGGGAAGCCTTT
AAGCTATTTGACTGAGAAGCAGTCAYAAGTGTTTTCTTAATGCTTAGAGCTGTTCAAGATCAATRTTGGTATAGAGGGA
ATGAAACTATGTATGTAGTATGTTGGTGCCGAAGATTAAAATAAATAATGACAGATTCAAAAAAAA
>00107 2 reads, 1184 bases
CTCAAAAGTCCGATGTTTAGTCAATACATGGATGAATGTATCCCTCAGTATTCTGTTAACGATGCACATGGGAGATCAA
CAACAGTAATGTCTGAGGTGAGCGCCTACAACACAGACAATGAAAACACACAGTCAGAGAACGGTGAAATCATGGCAAG
CTTGCCGGCTGATCTCATGTCTGTTGACAGCACAGACCTGTGTGTTTTAGCCAACATGGAGCTCCCAGCCTCCATCTCC
AGTTTGACCACACCAAGTCTGAACCTGAGCATGGAAGGTGGCACAGCCCAGAGTCTCAGCAGCGCCACCGCATCCCTCG
GCAACGGCCTAAGATTAGGATCTCTGCAGGATAACAGTAACTCAATGGATGTCACTGTTGTTTATGGTTCGCCCAGTCA
TCAGGTTTTGACCAAGATTGTTCAAGGAAATGGATGTAGACTCTATTACAGCAACACCAGCCAATTGAACCTCAATGAT
AGGAAATTTGAGGAAACTCTTTTTGGACCAAAAGACGTCAACCAGATCGCTTTGCCAAGCTTAGATCAATGCCCCGGTG
AGATCAATGCTGACCAAAGCGGCTTGATTAACGATTTGTTGGACAATATGGAGAGAGGTATTGTGATAACCATGAAAGA
TGGAGACATTTTTGTGCAACGCCTTTGTAGAACAAGGGTCTTCTTAACCAATGGAACAACTGAGAGCACACAGCTACAA
CGCAGAAACCAAGTTCCGACATTGGCATTCGACTTTGCCAAATTTCGCCATTCATTTCAAACCTGCTCCGAAGGCCCAG
ATGGGTCGAAAAAGGAATTACCCAAACCATTTTTTATACTGACCCTGGGTCAAGAAATTAAGAAGTCCCATTACAACCC
CATGAACAGTATCTTGATCCATATTGTTGTCAAGCACCAAGCTGCTGCCAAACACATGTCTCAGTCATCAAGCATGAGC
AACACATCTGGCCAATTTTACTCATCATATGATTCATATGACAAATTTCTGGATGAAGTGAAAAAGATTAGTCTTAAAT
CTTAGATTTAGTATTCAGTTTTTGTGCAACAAATAATTTTTTCTCAAAGTTAATTGTTAAGTGGAATTCTCTGTGGTAA
AGCAGAAAGGTGGCATATGAAATGAGAATGCTTTCATACTTTCATTCCACAAATTCATGTACATGTATTTCATTCCGG
>00108 3 reads, 1265 bases
GAATAGTTCGTACCCAACGAGCTAAAGCTGAAAGGGAGGCTGTTGATGAAGACGAACCTGTTGCAAGACCTGAACGCCC
GCCAACCTCTGCACAAAAACCTAGTTCAAAACGAGAAGGGTCACATTTATACAATGAATTATACGGTTTTCAGAGTTCA
AAAGGTGAAGGATCCCGTATAAGTATTCTGCCCAATGAAGATGATGAGGWTGTTGAGGATGGTTTTACCACAAAGCATA
TTGCACAAGCCCGTTACCTTCGCAACCATCGTCTCATTAACGAAATCTTCAGTGACACAGTTGTTCCAGATGTTCGTAG
TGTAGTGACAGAGGCAAGGATGACAGTACTCAAAAGACAGGTGCAATCTCTAACTATGCACCAGAAAAAATTGGAAGGA
GAGCTACATCAAATCGAGGAAAAGCATGAGCAGAAGAAAAGAAAGTTCATGGAATCAAGTGAAGCATTTCATCAAGATT
TAAAAAGGCTCTGTGAGAGTAAGCCACAGATAACGGATGAAATGTTTAACAATATGGTAGCTAAAGCAGTGAAAGAAGA
GATGAGGCTGAGGATGCAGCAAATTGCTAATCAGCAGCAAGATGAAGAGAGGAAAAGGCAGAACCCGCAAGTTGCAGAT
GATATCCAGATGGGTGTAGAAAGGCAACAAGAGGTTGGAGCTCTAGCTCCTAGTTCAACACTAGTAAATGGAAATCATG
AGCCGATGGAGGTTGACAAAAATGCAAACTTGACTCCAAGTCAGATGACAGTTAAAGATAACCAAATTATCATGGCTCC
AGCCATGGAATCTCATGCATCTGATACAGCAACGCCAAGCCCCCCACCAGTACAGCCAAGTGAAGAAATGGGAACCAAC
ACAACTCCAGAAAAAAGTGGCACAGAATCCCCCGGCACACCAAGCACAGCAGGATCAGCGAAGGAAAGCCAAGTAGACT
CAACCAGCTCAAATGGGATATTACAGAAGGAGTTGGAAACGGAAAAGACAGCAAGTCAACCAGAAAAAGTGCCAGAAAA
AGGAAAGATGAAAATCTGAACTTGGCTACCTTAGAAGTTTTGAAGCTGATGTAATCAGATATTGTGATTACTTGTTTTT
ATAGCCTCTTATTAATGCAACAGGCAAATAAATCCCTTATTTCATCAAAACTGTATAAACATCATCCATTTTTAAAAAA
TACAACACATGTAAAGTCAATTACGAGAAACTGATTTTGAGAAATGTTCTCTGACATAGAGTTATTAGCGTAATGGCTG
G
>00109 2 reads, 1299 bases
ATTTTTTTTTTTGCAGTTACGTGATCGGTGTATTATTTAAATTAAAAACCTTATAAATTTAATATATGATACCTGACTA
GCTGACGACACACAAGAGACATGACTGAGAGACGTGCCCAGTCCTTGCCACTGCTCTATGCAGTTGGGAGTCACTATGA
CGTGGGATACAGTGTTGGCAAAACTTTTGCAGRTAAGWTCMWMAGCTTCTGGAACGAGTCGGCTGATGTAAACAACATT
GATATACCATTCTACAACACACATGCCGGCAAGGAGTACTTCAAGAGAGCGTTAGAGATATGCAGGAAAAACTTTCCCC
AATATGTGCGAGAGCTTGAGGGTATAGCAGATGGAGCCCAGATGTCGTTTGACCACATTTTTATGCTCAACCTTTCTAA
AGAAGTTCACAATGTTGTAGCCCGTCGACCAGTGGATAAACAATTCAACGAAGTGGCCGGATGTACCGACATTTTCATA
AACAGGCCAAGTTGTAAAATCCTCGGCCATAACGAGGACTGTGACCCCAAGATTAAACCTTACGGCTACTTTGTCAGTT
TTCAAATACTTAAGGACAACTTGGAGGAAGTCGAAGAAACATTCACAGCATATTGTTATCCAGGAGTCCTGCCTGGCAC
TGCTTTTTCCCTTAACAGACATGGAATGGTATTCTCAGTTAATGGTCTTTACCCCGATTTCATCAGTGAAACTTCTCCA
CCAAGAATATTCATCAACCGCAGCATGATCAAAGCACAATCACTGAATGAAGCCATCAAACTTATTAAAAACTCTGGTT
TTGGTGTCGCCTATGGATTTACAGTAAATATTGCTGACATACGGCATCCTTCATATATGTGGTCAGTTGAAGTAGCCCC
ACATGCCAGTGAAAGCCTGCTTCATGTTTACACTGTGGCTGAGGAGAAAGATCCTGGCAGACCTTGTCATTATATTCAT
ATCAATAATTATAAACATCTCAAAACATCTGAAATACCAAATTTAAGGAGCACAAAAGCTAGAACTATCAGAACAGAAG
AGTTCCCACCACCAGAAAACAGGCAAAATCTCCTCACAATACTGGGAGATGAAGCCAACCAAGAATTCCCGATCTACCG
CTCTGAAAGACCTTCTGATCATTCAGTCACATCGTTTACTGCTGTGGTAGATATCATCAAAAATAAAGTTGATATATAC
ACAGAGAATCCWGYTAGAWGTKGAATAAARCCTTTATTTTACTTAAACATTATGGAGAAAAATGAAGTTTGAGGGGATC
CTATTATAGTGTTATAGAAATAAGCATATGGAGRA
>00110 17 reads, 916 bases
GCGGACGGTTAAATAATTAGWWSATAYRCTGAAAATATATAATTATAACAAAGCAATACGTTTGTCACTCAAATTAGGA
CCTATCAGTGCAGTGTATACAAGCAAAAGAACTAGGGATCCTTTTTGCCTCTGCAAACAAACAATATCTGTGAAACCAT
CTCTCACAAGACATGCAACTAATCCACTCAGTCATTTGTGCACTTGTGCCTGCTTCAACTTGCAACAATTTGTTGTTGC
AAACATAACATATGTTAGGATCTACTATGAACTCTGGAGCTACACCTGTGACTGTGAGACCCCTCTGTGTTTTTGCTTT
TTTTGAACAATAGTGACCTGATGTCTGACCAGCTCCCTTTGGCCTACCTCTTTTCTTAATGGCTTTTCTAAACCTTAGC
TCACCAAATGGGCTTGGAACAACACAATAWGCGTGGTCAGAAGCTATAAATTGAACTTTATCCTCTGAAGACACATTGG
TGCTTACCGTTACAATACCTGTATCAGGAAAATTTTTATTTCCTTCACTTTGTTTATTGCTTTGGGTGTTGCCAATTTC
CTGAAGATGGCTCAAACTATGGACCATTACATCTTTGTCTACCACACAACGGAGCCCTGCATCTTCACTCTTTGCACCA
GAGATCATCCCATAATTGTCTACATTCTGATACTGATAGACTGGAGAGACCACAACATCTTCATCTTTGCCATGTAATA
CAACCACATCGTCAATGCGACCATTAATACTCACTGCATCATCAGCAAAAACAAAATTGCCTACATTATCATCTTGACA
AACTGTGTCCCTTTGTTCAGGCAAATGAGTAAGTTCAGAAAAATATGGTATGTCATGGCCTTGTCGCCATTCGTGGATA
ATTTTTTCCAGAACACGGCAGCGGGTCAGGTATGAATTCAATTACCC
>00111 3 reads, 1091 bases
AAAAAAAACCCCCTCAAACACCTCCTATAACATGTGGCTCAGAATTTTCAGGTCCCAAAATTTTACTAATGTAGCTATT
CACTGCTGCATGATCCACAGCTGTTTGTTCCAAGGTTGTTTTACCAAGAGCTGATTGTTGGACTTCAGTCATTGCCCGT
CTAGGAGCTTGTATAGCAAACGTCTTAGGTTTAACATCTTCAGATGTAGCTAGTGCTTCCTCAGGCAGGGAAATCTGGT
CTTTAGTATAGATGTACACAATTTTTGGTTCTGTGCAATCCTCAGTAGTGACACTGAAAGTGTAAGCCATCTTTATCTG
TGATGTGTTGTGCGATTTCGGAATGGTTAAGATTTTTTTTACATTTTTTATTGTTGAATGATTGCTGTTGTACCCTCTT
CTGTGTTCTGCAGGAAAATCATATTTAATGTCTACCTCACAGTCTTGAAACTCAGCTGTATGTAAGTCTTTTATCTCAA
ATCTCACAAATGAAATCTGACCATTTCTTTTTTGAAAATGAATGTCAACTTCAGACCCCAGGGAAGTTGTTTCGATTYG
AGTGAGAAYCCTCACGACAGCCTCTTCGGAATTGTTCATAAACTTAGCAGAAATGTTGAGCTGATAGTGGTCGGCCAGC
AACAATCCATATGTCAGGTTCACTTGATGTGCAGCTTTATTCAATAGCTGGACTGAGAGATCACAAGGAGGTAGCAATC
TTCTATCAGAACATGGTTCCGGTAGGAAATCTGAAGGCCTCCAAGTAAGTGATGCAAGTTTTAATGTTGGAGAAACTGG
CGTTGTTTCATCATTTAATAAACTAGTTTCCATAAGTTCTTCATTTATCCGCTGCTTTGGTGGAGAGTTTGAATGAAAA
TAAAAGATGCTCTGTTTTTGTCTCCTATTTCCCCTGATTATTTCTTGCTCAACGTCAATTACAAACATAAGTGCAGTGT
AGGTTGTTAAACTTGATTCATGTGCTTTGATATTTCTTTTAAGCACTGGCCATTGAAGGAATGATTCTGCTCTGTTAAC
CTCATCAGGTTTGTGGTAGATATCCAGATCAATATTTTTTAATTCATCTATTTTTAGTGCAGGT
>00112 3 reads, 1276 bases
GCTCTTCGATTTTTTGTTTATATATATGAAAATGTTGGTGAAAATGCTAAAAAAAACTTCCTTGATCTATGCATGGGGT
GCAGCCACCTCAGGGGCTCTAGGTATTGCCAGCTATGTAAAACCAAACCTAAAGTTCACAGGTCAACAGAACTTAATTA
ATAAAATCAACAGACCTGCTCGTGTTCGATTTTTTGACATTCACCAAATGAAGCCTTATGACATTGCTTGTGGTTATGG
TTTCACTGTTGTAGCAGTTAAATATCAAAACAAGAGAATAGTCATAGGCACAGGAGTCAACACAGACTCCCAGATAGGT
TATCATGAAAGGCCAAAAGGATCAGGAAGAATTCTGGATCTGCTCATAGAACCAAGTCCTATCAGGTTGCCACTTCAAA
AGCCTGAAGATTGCCGTGTTACATCAATGGCATGTGGCAGGGCCCACACAGTTATTGTTGTGGAGAAGGAAGGAGTATT
TACATTGGGTAATAATGCATATGGCCAGTGTGGAAGATCTATTGTGGAAGGTGAAGAATATAGCAAAAATCAAACCATT
AACAAGCTGACAGATGTACCAGAGGATATTATAAAGGTTATATCTGGTCAAGATCACAGCCTTTTTCTCACCCAGTCAG
GGGAGTTGTACAGCTGTGGTCTTGGAGCTGATGGACAAACAGGTGTAGGCCATTACAACAACACATCCAAGCTAACAAA
AGTCAAAGGAGATATAGATGGAGTCAAGATCACCTCAGTTGGTTCAAGAGGTGACTGCACTCTGGCAGTTTCTGAAAGT
GGTGATTTATTTGGATGGGGTAACTCTGAATATAACCAACTTGGTTTGGTGACCAGCGAGACACAAGTTAATCTGCCCA
GACACATTCCAGTTCCACATTGTGGAAAGGTGGTTAAAGCTGTTGCTGGTGGCTCCATTTGTGCACTTTTAAATGAACA
AGGTCAGGTATTTGTTTGGGGGTTTGGCATTCTGGGTAAAGGTCCAAAACTTGAGAATTCTTCTACTCCGTCATTAATT
CCAGAACCCATATTTGGCCGCAACGAGCTGTCACCCAACACTAAAATTGTGGATATTGAGTCTGGTCTTACTTATCTTT
CAGCTAAAAATGATAATGGTGATCTCTTCACCTGGGGTCGCAATAATAAAGGTGTCCTAGGGCTTAATGAAAACAAGAA
TCAGTTTTTTCCTTGGCGGGTAGCTTTGCCAGCAGAGGCCGTCAAGGTTGCCTGTGGATTAGACCACATGGTGGCTTTA
TGTAAATCTTTC
>00113 5 reads, 1286 bases
CTTTGATGTCTATGCTTCTGTGGTTGCTGATGCCATAAGGCTAAGAMATCTTGATACAAAAAAAATAAAATGTTATGAA
AAACATGCAAGTTACACAACCATAGCTAGCAAGGGTGACACAGCTTGTGATGGATTACACAGTTGCAATAGTGAAACTC
TCATCAATAAGCAGACATATGCTTCAGAAGAAATTCTGAGCAAAGTTATATTTAGAAATGGTAAAATTGTTGCCATCAA
CAAGCCATGTGGAATATCAGTTTATGGTACAAGCCACCACTTGACATCAGAAGCTGGGGATGCATCAAACCAGCTGAAA
CCAACTATTCACCATTGCTTGCCGTTTTTAAGAGAAAAGTTACATTGTCCAGAACTGGAAGTGGGCTTATCTCTCAAAA
GTTTCTACAGTGGTGTAATGCTACTGTGTAAAACCAAAGAGTCAAAGAAAATGTTAGAAAAATATATTGCAGGTGCTGG
TGCCCAGAAACAACAGTTCTTGTCTTATCTAGTGATCACATTAGGAGTGCCTGCATGTCCTCACAATGTACCATTAGAA
GCCTACATTACCAGAGAGTACTTACACAATAGAGAACTTAGTACTGTAAGCACTAAAGACATCCATTCTGCTCGCAAAG
TAGGTTCGATGATGCTGACAAATTTTAGTGTTAAGCCTTTAGTTGTGAGCAATGAAAGTGCAACATCTTTAGTGGAAGT
TTCAATAAATAAAGACAAATGGGAAGCAGTGGAAGCTCTTATGAGTCACTATTTGAGTCCTGTACTTGGAGATCATATA
TACTCAAGCAGGACCTACTCAGTAATGGGAGTGCCATTTTCAGCCAGTCCTTATTCGGTCCCTCCTAGCACACAGAAAG
TTCTTCAGAAAACCCTGGAAGCTTTGGAGCACAACTTTTCCAATGATGTACCACTGCCTCTATTTATGCACAGACACAA
GGTGACACTGAAGAGGTTTCCTGTAAAAAAGTCMCCTCCCCTTATTATTACTGGTGCCCCACCGGAAGATTTCCTGCTT
GCTCTTAAGTGCCTAGGATTGTATGATACTTCTATGTTCTTGTGACAATGGTTTGAGAACAGAGTTTATCTGTTGTGAC
ACTGATTTCTTCCTTTGGATTATAAATATATAAAGAAAGCTTCACTTATCTGTGCTTGACTGCTGTTTGTTGAGACCAA
GAGGATGAAATTTCACACCAATATTACAATGTTTTTAACAAAAATTATGAYCCACTACTACTGAATACACATTCAGAAA
TAACAAAAAAAAAAAAAAAAAT
>00114 3 reads, 1179 bases
GCTAGAATAGGGATAAAAAAAAAAAAAAAMSGMTGASWCTATGTCCTTGCAATGTCTTCAAGATAGACCTGTGCAAGTA
CAGCACTAACTCATATCCATATGTATATGAAATTTCTGTCACAGTGCTAACAGCATCATGTGAAACAATGCTTTTAATC
AGAGTTTAAGCTTAACTTCAATGAACAAGAGATTAACAGAGTAATTAAAAGTGCTTGCTTGGTGCGCAGTTAGCTCCAA
TCACATTGAAGMTCAGGTGATATGMAACGATCAAATTAGCAGACTACATATTTCAATTGTGCTCAAGTCAGCATTTAAT
TAGTATCACAAATGGGCTAAGAGTGAGGGGGATGACCCATACATCCACAAAGGTTTAAGGCAGGCAAGTTGGATGTCAC
ACCCCACTGACGGAACTCGAGCAAAGGAAAATTTGCATCCTATTGTGGATTGGCTGAAAACCACAGACAAAGCTTTGAT
TGTGGAGAAGTTGCTTCTGGGCACAAACAGTGTTTCTGCCTTGGCTTCCAATTCATCCAAATAATGTATTGTTTTCCAT
CAAGTGACATCTCTCTTTGAGTCTAGCACTCATGGAGAAAATGTTAACATCTATAAATGAAAGAGGGGTAATATATACA
CCTGTCTGGCGTGAACTTCCAAGCACTGAGTTCATTTTGTTTTTGCTTGAGTTTTTCTTTGTGTTCATCCATCTCTTTG
GCCATGCGTTGAAATACAAGGTTGATGGCTGGATCAAGAAGCATAGAGCGCAGCTGGGCTGTGTTTTGGGTCTGTGCCT
GCTTCATTTCTTGAATTTGGTTCATACAATCTTGAAGCTCCTGTTCTTTGTTTGTTAACCTCATTACCAAAGTGTGTTC
CCTGCGAGCTGTTTCTATATTGATACTTTTACTTTTAGCATCATCCTCTTTCCCATCTTCATCATCTGGATCGGACCGT
TTTCTGCTTTTTGATTGCAAGAAATTGTTTTGTTCATCATGCTCACGATCACGGATTTTGTATTTATCATAACGATCTT
CTTTTTCTGAGCTATCATCGTAATCAAGCCGAGGCCTTTTGGGTGACAAAGAGGCCTCAGACATAATAACTGGAATAAA
TTGTATTTCAGATTAGTTCAAYYTKAAKACGCCTTCYRCYWTKAACAGKAAATTATGCAAATATTACCCTGTT
>00115 14 reads, 1349 bases
CCCATTAGATGGAGTACCACWSWTATWRYRCAGGGGATGAAAATTGTATGAATAATGCACAGCAGACCTCACTTCCATG
TCCACCAGTTCCTGACCTGACCATTGATTCCAATAGGTCCACCCCAAGTGATTTTGAAATTGACGTAGGTGCTGACATC
TTTGAAGATGATGTCAAGTTCCAACCCATACAACCAAAGTTAAGGAAACTGTCCTGGAAAGACTTTGCTGCTCCATACA
GTAGGTTAGTGTCCACAAACTTGAGTGATTCCCCACCTATGTCACCTTGGGGTCTACTGTCCGAGGGTCTGAGCACTTC
AGCCCTGTTATACCCAAGTCAACAAAAGTCATCGTCTGATCAACCTGGGTTTACCCATCAAAGATCTAAGATTGTTAGA
CAGAATTATTCTAAGCGAGGGAAAAAGATTAAATCTTTCGTGAAAGGTAAGAAATCTGCTGAAAAGAAAGCAGTGTTAC
CAGCCATACCATCAGCTCTTGATGAGTTCATACCAACAGAGACCGCAGAGTCCGTCACCAGCTACCTGACTAAGAAATT
CTCCTCCACTCCTGGTTCTAAAATAAAAGGCCCAAGATTATTGCATGACCCTTCCAAAAAGAAAGCCACACCTCAGAAG
GCAGAATCTGACACAAGCCTTGCCCCAGCAGCTCCAATTCTTCCAGGGCCAATAAGCACGGCTGAGTTGTCCAAGACAC
CAAGTCTCAGTGAAATATTCGGCATTGAGATCAAAAAGAATGTCAGCTCTGCAAACCTCGCAACAGGTTCTGAATCCCA
AGTTGAAGTCAGAGGAAGCTCAAGTGAAGATTTTCTACAGGTGTCCAAGAGGAAAACCTCACAGGTGGCTAAAAAAAGA
ACCTCACAGATGGCCAAAAAGAAAACTGCACAGGTGGCCAAAAAGAAAACCTCACTGGTCGTGAAAGAGAAAAGGTCCC
AGGTGGCTAGAAAGAGGACCTCTGGTAAGAAGAAGAAGCTGGATGCTGGCCACACATTCAATAGCAAGCGTGTTTCTAG
AGGCGTAGAAACTGTGTCAAAGACTGGAGGTAATGGTACACTTGAAGCTACAGCTTCTGAAACTGTCTTCAAATCTCTA
TCTCCTGATTCACAAGTCACCTCAAGTAACTTGGAGTTGAGACAGCCAGCTCCATGTGACATGAAGAATGAATTCATAC
CATCACTAGATGATACTAAGTTATCAGGAGGACATGTGTTGATAGCCAAAACAGCCCTGTCCAATATACCTACATGCAC
AGTTGCTTTACATCGATTGGAAGACATGAAGCAGAGCTATGAATTAAGAGATGGCATTTATTTTGTAAAAGGAACCAAG
TCCAAG
>00116 3 reads, 1397 bases
AAACAACTTGTTTGTAATCCCAAGTWMAYWTGTAGCTATCCATAAACTTGATTAATGAGGTATCGAAAATAAACGCCAA
GAGTTCCAAAGGCAAGTCCTGTCTTGTGGGATAGACAATCACCTGTCATAACTTTTTCTCTCATCAGTTTTCTTCCTGT
TCCCACCACACTGTGATCAATCCAATCAGCTTCCTGTGTCAGGCGATCCAATAAATCCCGCTCGTCCTCTTGTATCTGG
GACAACTGAGCCTCGATGGACATCAGGTCGATGGGGGAGCCCGTAGCAGCCCCGCCCCTTCTGCCAACTCAAGACCATC
CGAATCCACTTCTCGGAGAAAAACTCTTTGAATCCCAGGGTCCCACACAACACACTTTGTTCTAAAAATAGATCCTGCT
TCAGTTCGTTGACTTTGCCCTGGTCCTCCAGCCCGCTCGCCTCGCTGTAAATACTTCCACACACGTGTTTCTCAAACTG
CCGGACTGTGGTACCGTTAATTTTGGCCAGGTATTCGTTCATCACTGGCAGACATCCACCCTTCTCACTAAGAATGAAG
TACAGGAGCTGGTGAGTAATTGCGTACTCTCTCATACCTCCTTTCGTCATCAGTGTCCAGCATTCTGGACTGAGTGAGC
ACCTGGGGTAGCTCCTTCCACTCTCTTGGTATGTTCCGAGTATCTTAGAGAAGCAGACGTCGCCATCGGTCTCTACGTA
AACATGATCGATTCCAGGGGGTGGAAGGTTGTCACCCAGACTTTCAAAAGTAAAGTTGATGGCATACGGCTTGTCTATC
GTTTCATGGAATCGTCCAAAGTAAACATCGTCTTGGGCCTGTATATAGGACAGTGCCTTGTCCGCTAAGGTAGATATTG
TCCGGATATAGTAGTCGAGTTTTGTTACCAAGTCTTCGTGGACAGCTGAGTCTGTTTGATTGGCAGTCAGCTATTGATC
CTATAAGTGCACCTTGACAAAGTCGTATCCCGAATAGTCCATCCACATTTATAGATGAAAAATCCTCCCCGAAAAACTT
GATCGCCTTAAACATCGCCCGGTCAGTCTTGTCCAGGAGCTGCCTGGCCACGTCCGGTTTCATGCCAGATGGCACTGCC
ATCACGTGACCAGCCCCCAGAAGCAGCACAAGGAGGATGCCGGTGGTCCTCTCCAAGGTTTGCCACAGCCTCGATCCCG
TCATGGCGAAGTACGCAGTCCGGTAATGTTGGACTAGCTGCTGAAGCACACAATACACCAATATTCTTCTNGTGTAGAA
GGAARCTGGAAACGCGACAGGCGACAGGTTTGTGCACCTAGTCCAGTGACCAAAGCTACTAAAACGAGTCTCCCAGATA
AACATCTTGTGTTGACTCATGGGCGTTGTCAGCGAGTGTGTTGTTGGACTGATT
>00117 8 reads, 1223 bases
TTTTTGAATTTGTCTCTGATCCAAWSWSWSCAGGCCAGAATAGTCTCGAGCAAACACTATCTTTTTTCAGCCATTATCT
AAACTCCCAATACTCAAAAGGTGGTGAAGGCACATTTGGTTTCTGTTCCTGAATAGTTTTGACAGCTGTAAAATCTATT
GAGAGCAGACAGACAGTGGGCAGGCAAATAGCTGGACATTCATTTCTCACAAATATTCAATTTAAAAATTACTAAGAGA
GCAGACAGTGGGCAGGCATATAGCTTGAGATTCACTTCTCTCAAATGGTTATTATCATTACTGCAGACACACAGTGTCA
AGACCTGTCAACTGTCTGTAAATAAGACATGGACTATTAAATTTATAAAAAAGATATGTTAGTTGTTGCAGCCCAATAG
CCAGAGCCAGAAGAAGTATCTTAACTTAATCTGAGGTTGCATCGGAGGGTTCTCACTCTCTTAATTTGTTGCACTGTCA
TAGGTACATGATGGAGAATTATGCCTGTGAATTTGTAGGACTCTCTCCACACCATGCACAGAAACTTCTCTAAACTGCA
GATTACACTGGAAGCACCTCAGTGTGTCTCCAACTCCAATGTAATACAATCCATGCCTGGCTAGTTGGTCAGTTTGACC
TCTATCCAGCAAAGTGATTCCTTGTAATGATCTTACTCTTTCAGCCAGGTGGCTGAAATCAGGGTCACTTTTCAACTGG
ACTCCCATGTCATGCAGGCCTTCAGTGGCAGCAGCATCATTGGTTTCGAACAACAGTTGTCTGTAGGTCAGATCTTCAT
CTTCCACTCGATTACCACCACGGCAGACACGGTTGTGAAATGGTTCACCGAGTCTTCCAAGATCTTCAAATGAAGTTTC
TCTTCTACATCCCATGCAAACAACCTTGTTAGCTCTGTGGAAGAAGCCATCTCTTGCCAGCAGTATTGCAAACTGCCCC
ACGCCTCCATCTCTCTGCTCTAGTAAATCCCCAACATCTCTAAAGGAAACCAATCGATGTAGATAGTTGCTCATCCGAT
TAATATCCTGTTGTGACGGCATCTTTACCAGGTATATGTTTTAGCTCCCCATGGGAGTCATGGGGAGCTTCAAATCTTA
AAGGTGATGATGCACTCTAGGAATTTTCAGTCAGTCACTCTTACCTGTGATTAAAGCTAATAAAATAAGTTGCTTATTG
AGAAATGTGATAATTCTACGGCTAGCAAGGCCTTTTTA
>00118 23 reads, 975 bases
AGGGATGTCCTGMRAGARGGYTAGAATCTGATGAGGGAATTTGATGAACAGCTTCCAGTGAAGGCACGTACATGTGATT
TTGAAAAATTCTACTCAAGGAAGGCACCAAAGAACATCTTACAGAATTTTCCAAGAACGCAGTACATGCTCTTTAGAAG
TAAATTGAACAGATATGCCCAAACCATAATGGCTCACATGTTGAACACAGGCCAAGGTGTTGTAATGAACAGAGGAATG
TGGTCTGACATTGTGTTTGCTCACACTTTGAGAAGACATGATTTCCTGAGTCCTGCCGCCCTGAAAGCATATCAGTATC
AGTATGATGTGGCCACAGACTATTTCTGGCATCCTCATCTAATTATTTACTTAGATGCCCCAGTTCGTCTTGTCAGAGA
CAATATTAAGAAGAGGAATGTGCCCTGGGAATTGAATAGCCCTGTCTTGAATGATGAATTTCTCCACACCATCAATGAT
GTTTACAAGACAGTCTACCTTCCTCAAATGAGAAAATACTGTGAAGTTTTGACCTACAATTTGGCTGAGGCACCTGTGC
CAGATATAGAAGTTATGGTTGAAGACTTAGAAAGTCTTGATCTGGATAATGCACCCTTGGATAATGAAAAGCGCTTTTC
TGATTGGAAAAATTTAACCAACAGAGACTACAACCACATGCGTAACTTTGGCTCACCCGCTAAGCAGTACAAGCTTGAA
GAAATCTTCACCTTCCATCCTCCCTATGAAGCTCCAGAGCTCATTCTGGATGGAATGGATCTCATTCAGTACAAGGAAA
TTGTTGAATCAGATCCACGTATCAAGAATACAGAATATATACAATATGTATAGTCTTTGAGTTGGGCTTAAAATGTTTA
AAATTGGATTAGTTGTATGTCAATTTAAAAAGCTTGAAAGACAGTTAAAATTTTTAATAAAGTTGTGAAAAGTCAATGA
TGAAGTTAATAAATACCTAGGATTGAA
>00119 2 reads, 1359 bases
TACGTAAAATRSCGMWWKSCGGGGAGGTAGCCATTTTTGAAGTCGTTACTAGAATGGAGATGCGCCGTCCGTTCGATCC
TTTGGCTCACGAGTTGGATCCCAATTTCCGACTCACAAAGTTTGCTGACCTAAAGGGATGAGGGTGTAAAGTCCCTCAG
GAGGTTTTGCTCAAGCTTCTTGAGGGACTAACACAGGACAGCAATGCCCAGGACGCGGAGCAGGCGCATTTCCAATATA
CCTCGCCATGTCCGCGAATTGGCATTGGCATGGATTCGTCCATTACTCCTCTTCGGCATGGTGGACTCTCGTTGGTTCA
AACTACAGATTACTTCTACCCCCTTGTTGATGATCCATATATGATGGGTAAGATCACTTGTGCTAATGTTCTTAGTGAT
CTTTATGCTATGGGTGTAACAGATTGTGACAATATGCTTATGCTTTTGAGCTGCAGCAACAAGATGACTGACAAAGAAC
GTGATGTCATCATTCCAATAATCATGCGAGGTTTTAAGGACGCAGCTGAAGAAGGTGGGACCCAGGTGACAGGAGGCCA
GACTGTAGTCAATCCATGGATGACAATTGGTGGAGTAGCATCATCTGTATGCCAGTCCAATGAGTACATCATGCCAGAC
AATGCAGTTGTTGGAGATGTTCTAGTACTAACTAAACCTCTTGGGACACAAGTAGCTGTGAATGCTTACCAGTGGTTGG
ATCAACCAGAGAGATGGAATCGTGTTAAACTTGTTGTTTCTGAAGATGATGTTCGCAAGGCCTATCAGCGTGCTATGTT
TAGCATGGCCCGTTTAAATAGAACTGCGGCCAGACTGATGCATAAGTACAATGCCCATGGTGCCACAGATGTAACAGGC
TTTGGTCTTTTAGGCCATGCCAATAATTTAGCTAAAATTCAAAAAAATGAAGTGGGCTTTGTAATCCATAATCTCCCAG
TTATAGCCAAAATGGCAGCCATCAGTAAGGCATGTGGCAATTTGTTTGGCTTATTACAAGGGACATCTKCTGAGRCATC
AGGTGGCTTGCTTGGTAGCCCTGCCCAGAGAACAGGCTGCTGCTTTCTGTAAGGATATTGAGAAACAAGAAGGTTATCA
GTCATGGATCATAGGAATTGTAGAAAAAGGAAATCAGAACAGCCCGTATAATTGATAAGCCAAGGGTAATTGAGGTCCC
TGCAAAAGATAGGGAGGGGGAATTATGGTAATTGTCTTTGTTTTGTCAATGTTCACACTCATTGTCTTTTATATCCACA
TTGGTGTTCATTATTATTCTTATTATGTGCTGTCTTGTGAACACTATATTAGAGAACAATTTACTCAAGTAATAAAATT
TATGTTAAATCAGTGG
>00120 6 reads, 1373 bases
CTGGTTTGCACAGTTTTCTTCCCTGAATTTSATAATTAATGAAATACATATAAACCAATGCTGAGTTACTTCAATGTTT
TTGCCATGATTTCAGTTGAATGGTTTTGCAAAATCTTGTCATAATGATTGTTTAAAAGGTTTAAATCAAATTAGGAAAT
CAACTTGTCCCTTACACTGGCTTGTAATCCAGTTTGCTTTCTAATTTCTTGTTGTCAGCTACTTTTCTCACAGCTTTCA
TGAAATCTTCCTCAATAACATAGTCACGCTCTGCTCTGATGGCAAACATACCAGCTTCTGTACAGACATTCCTAAGATC
AGCACCATTGAAATCTTCAGACAATTTGACAACAGCTTCCCAATCTATTTCTCCATGCTTTGCTATTGGATTCGCATGA
ATTTTAAGAATTTCTGATCTTGCTTGCTCATTAGGCAGAGAAATTTCTATTTTTCTATCAAGTCTACCAGGTCTTAACA
ATGCAGGATCCAAAGTGTCAGGCCTGTTTGTTGCCATGATCATTTTGACCTGACCTAGAGCATCAAAACCATCCATCTG
ATTAAGAAGCTCCATTAACGTTCTCTGTATCTCTCTATCGGCAGACGTCCCTTCAGAAAATCTTCTTCCACCAATGGCA
TCAATTTCATCCATGAATATAATACATGGCTCATGGTCTCTAGCAAATGCAAACATTTCCCTGATGAGCCTGGCACTCT
CCCCGATGTACTTGTCTACAATAGCACTAGAAACAACCTTGAGGAAGTTACAGTCCAACTGACTGGCCACAGCTCTGGC
TAGTAGAGTTTTCCCTGTGCCAGGTGGTCCATACAACAAACATCCTTTTGGTGGAGTGATGCCAACAMGTKGAAAGAGT
TCAGGATTGAGAAGAGGCAGCTCAATGACCTCTCGAAGTTCTCTAATCTGTTCTCCAAGACCACCGATCTGGTTGAATG
ATACATCACCAGGATCCTCCACTGACATGTTGTAAACAAGTGGGTCAACTTCCCGGGGAAGATATCTCATGATAGTCAG
TGTAGTCATATCAAGTGCTACTCTGGTTCCAGACTTGAGTTTAGTTTTGTCCAGTTGGCGCCGACAACCAACGACATAA
CGTGGGCCGTTGGTAGCTTTTACAATAAATTTGTCTTCAGTTAGCTGTTTGAGAACTTCACCAACAATCTGGCCAACAC
TCTGCAAAGCTTTGAGATCATTCTCAGACTTGTCATACTGTTTGGTTAGCTCTTTTAAGTTTTCCCTCATTTCTTTTAA
ACGAGCCTCCTGTTCTTTATGCTCAAGGAGTCGTTTTCTATAATCCGAAAGAGCTTTCTCTCTAGCGGTGTCAACAACT
GGAGCAGCCATCTTTGCTTTAGTATTACCC
>00121 18 reads, 1100 bases
TTTTTTTTCTAAATAAAAGTTATAGTCWGAYGACTCATGACCACTGTCAAAATATCATGATGCTAAATGAATCTGAAAA
ATTCATATTGACTCGACAGTCCAGAAATGAACAGCTTTGTCTCCACCAACAGCTACTATGGGTAGGTGCAGGTGCCATG
ATAGACCATAGGAAACTTTAAGACTTGCATTACACATGGAGCGTGTTGATGTCTTGTGTTAAAAACTTTCAGCTGCCGC
CCAGGTCGTCCACAGGTTGCCAAGAGAGATTCATGACACCGTGACCATTTAAAATTTCTTGCACCCTCATTATGTGCTT
GTCGCTTTTCAATAGGAGTGCTTGAACGAGAAACATCAAATATCATCCAGTCTGAGCCGRCCACAGCCCCAACAAGGAG
ATTGTTATGTCTCGACCAATCAGCTGACAAGAGTGGTGTTTGACCACAACTTAAGCTCATGATTGGCTGATTGTTATGC
AGGGAAAAAAATCGTATGGTCCCATCTTTCTGTGCTACCATCAACTTGTATCGCTCATCTGAATGCCAACAGACTGAGA
CACCAGGTGATGTAAGTTGAAAGATGGATTCTTGTTTGACATTTGTGAGAGACCATATGCGACAAGTCATATCATCTCC
TGTACTTGCCAATCTAGTGCCTTCATCGGGTTCATATGTGATGGAATTAACAAACCCTTTATGTCCTGAGAGGATTGTA
ATAGTGTTTGAAGTATTCATATCTGTTGAAAAAACTGTGAGGGTTCTATCATCAGTTGCTGCTGCAAAACTCATGTGTT
TAGGTAAAACTTTTAGGGAGGTTTGTGGACTCCACGCAATAGCCAGTGTACTTGATTTTGTTGAAAAGTCTCGCAATCT
TGTATACTCAATACCCTTTGAAATTTCTGCATCTTCTTCCTGGAAACGACATGAATAAACAGAAATGCCTGACGACGTT
CCAACGGCAAGAAGCTGACATGACCATTCAAATGGAGAAAATTCCACACAATGAACTGTCTGTGAACATAGGTATAGTG
TAAGTCGAGCCAATAGTTGCTTCTTTCATTTTTATTGATTACTTTTTTTTACAATGTTTATGTTGTAGTCTCA
>00122 7 reads, 1155 bases
CGGAACCTTTTGCTGTTGTTWAATCTARAWTTTAACATTGAGGTTTATCCATCTTATGAAGATGATTTTGAAAAAGACT
CAGATACCTTTACCAAAGATTCATCATCACAGAAAGTGAGCTCAGATGATGACCAGGATATCATTTCCCCTCCCCGCAT
GAAGGCAAGCTCTCCTCAACTCTTGATAGACAAAGAAGAGAAAGAGGTAGAAAAGGGACAACTTGAGGTTGATCATGGG
AAACCTGAAGCTCAGGGCAAAGAGAGATCACTGGACGAACCATCTGACAGTGAGCCAGAAAATGATGCATATAATTTTA
CGGAGGATCAGAAGCGAGCCATGATGGAATTGATGGTACAAAAGCAGGAAGATGGAGATTTGGTTGACGAGGACCCTCC
TGAGTACAATGTCAAAGGTCGAATAGAGCAACTAAACGCTGAACTGGCCAAAGAACCTATACCTGAGGAGAAAGACAGG
GAGACAAGGGTGGGGTTCAAGCCTGAAATTGTCGATCTTGTGGCGCCACCGCCACCCGACTTTAGTGATGATGACTCTC
GACCCAACAGTGCGCGGGGTCAGGAGACTGCCCCTAGCACAAACCAGAATGGCACACCCCAAATCAAAGATAACGAACG
TTTGATAGACAAAAGCAAAGAACAATACGTCGTTGAAAGGGATGGAAATTTCTTTGTGCTTAGTGCTAATGAATTGACA
CCGTCAGAACGGGCAATGCTCTTAAATGATGATTCAAAAGTGAAAAAGGTTCGGTATCCAAGTGACAATCAAATAAAAA
GTGAACACTCGCAGGAAGTTAGTAAGAGAAATAATGCTGAATCAGAACATATTGTTCCGCAACCCCCACCACAACCGAG
GCCAAAAAGCTCAGCTAATGGCCCACGCCGGAATATTTTGCAGCCGTCAGCTCGCCCAAAGTCAGCAAATAATCCCAAT
ATTGAAATGTCCAACAATGCTGATAATTTCAACTACAAATCCCCCTATGCCATGACTCCTGCGCAAAAGGAAGAAGCCA
AGAGAGAGGCTCGAAAACAGGAAGAGGAGAAATTGAAGGAGGAGAGAAAAAAASWWSWWGATGAGGAAGAGCGAAAGAA
AGAGAGCATGGATGCCTTTCAGGCCTGGCTTGATAAGAAAAAGGAAGAG
>00123 4 reads, 1352 bases
GCGAGGTCAAGTTCCAGCGGGGTAACCGCCTCACGGTGGGGGCTGCTGGGGCAGCGACTCCGCCTCTGTAGTAGTAGAT
AGCCGGAAGGGTGGGCCCCGTGTAGACGTTAGACTTCAGGGCAGTTGTCAGTCCATGCGCACTAAGTTCCACGTCGTTG
GCACTAAAATGTATGKCGCCCCACACGTTGCGGCTGGNNNNNNNNNNTTCTTATCTGAACTTGCTGGATCTGATGGACG
ATCTCAGACGTGCTCCAGTTGTTCTCTTCGATCCTGTAGTCGGCTAGTCCCGCGTAAATGTGTTTGTGCATTGGGTTCT
GGGCGGGGTCCGACCACCAGTCCACCAACTTGGTGAAGCTCTGCGGGCCATCGATGACCCAGTACAGCTGTGGAGCCAC
GTAGTCGAGCCAGCCTTTCTGGAGCCACAGTCTGGAGTCGGCATAAATCTCATCGACACTTGACATTCCAGATACGCCA
CTGGGATAGCCAGATTTCCAGATACCAAAGGGGCTGATGCCGAATTTGACCCAAGCCTTAGTTTGATGAATGTTTGTTG
ACAGCCTCTCAATCAGCTTATTGACATTGTCACGTCTCCAGTCTGCCAGGGCCAAGGTTCCACCAGAACTCTTGTAAGM
ATTATAAGTGCTCGTGTCAGGGAAGCGATCGCGCCGTGGGGTAGGGGTAGAAGTAGTCGTCCATGTGGACACCGTCAAT
GTCGTAACGCTTGACAACATCCAGGATGACGTTGGTCACTCTGTCCTGAACTTCTTTACTTCCTGGGTCCATCCACAGG
TTGTTACCGTAGGCGTGGGCGTGGGCTGGGATGGCTCTGGCCATGTGATTGGCTGCGAGACCGGAAGTGGATGTAGAAC
CAGACTTCGCCCTATAGGGATTAAACCATGCGTGAACTTCTATATTTCTCTTGTGAGCCTCGTCAATCAGAAATTGCAG
AGGATCCCAGATTGGATTCGGGGCAGTACCCTGACTTCCGGTCAACCACTGGCTCCATGGCTCAATAGTAGACTGGTAG
AAGGCGTCACCGGCAGGACGGACTTGGAAGAATACAGCGTTTATGGTAGCCGCTTGAAGTTTGTCCAACAAAGTCCTTA
AGTCGGCCTGGTTTTGACTGGTTGACTTGGCGCTGGACTTTGGCCAGTCAATGTTACTGACTGTTGCGATCCATGCCCC
CCTGAGTTCTCTCTTGGTGCGACCACTGCTACACGCTGCTTGTGCAGACGCCAACAATGTTAAAAGTACAACTGTCAAA
CACAACATCCCAGTGGTCCTGTGGCACATTCAGTGATTCAAGGTAGAAATAATGGAGCTCTTGTGGCGGTAAACGTTCA
TGATTAAAA
>00124 14 reads, 1583 bases
TTCACAATGACATGATTTCTCATATAGACWTYWTWCMAMGWATACTTTAAMATAGTTTTCTGAGACTGGTAAAACTTGT
TAATTTTAAAGAAAAGGATTTTCTACGTTGCAAATTTCGCTTTTTGTGAATACTTTGGATAAGAGCAATTTTATTTTTC
TATAAATCCACCATGAAGATAACAAAAACTSTATCTCTTCTGCTTCTGTTGTGTCTGTGTCACGTGTCTCAGTCCAATC
CTGTACATCAAGGTTGGAGCAAGAAGCAGGCAGACATCTACTTCCTTGTGGATACCTCGACCAGCGTTTATATCCGTGA
CTACTGGAAAGAATTGGAGTTTGTGGCAGACCTTGTGTCCCAGATGGACATTGGTCCCAACGACACACGCGTGGGTGTT
GGCCTGTACAGTGAAGCTCACCACCTGTACATTCCCTTGAACAACACCTTGAGTAAAGTAGAGCTCATCGGTACCATTA
AGACAGCATCCTATCACCGTGGTGATGGCTATATCTCAAGGGGTCTCCAGGGAATGTTGACCAAAGGACTAGCACCCGA
ACTGAAAAGACCAGATGTCCCTCAAATATCTGTGTTGTTTACTGATGATGACGCAAGAGATACATATTCGGTAATGAAC
CTTGCAAACCAGGCCAAACAACAGGGCATCTTCCTGACTTCCATCGCCCTTGGAAATAAAGTCAGCTTGTCTAAACTTG
GGGAATACACCAGTGACCCTAAGTCGGACTTTCTGTTTCATGTCTCAGATTACAGCTACTTGCCCAGCATTCTGTCTAC
AGTATCAGAAAAACTATCCCAAGTGGAAGCCCTACCAAGCGATCAAGACGTTTGTGGTAGAAACAACAAGATTGTAGAT
GTTATGTTTATTTTCGATGAAAATGCTATGGGAAAGAAAGTTTCCAAGAAAATTAAAGAATTTTTGCAAAACGTCACCG
AAATATCTCAGCCTGGACTCTGGAAAAGTGAGAGCGGGAGTAATGTCAAAAACATGTCAGGAAGGAGATATACCTCTTG
TGCAGATATCTGAAAAGATCACAGTTTATTGAAAGCCTGAAAGTGGACAAAGGCGATGAAATTAGTTATTTGATCAGGA
TGGCCATCAGGGATTCCTTTACTTTTGAAAATGGTGCTAGACTGCGGTCTTTGAAAAGGCTGGTGGTATTCTTGGATGA
TTACCTTCGAGAGAAGAGGGAGATTCACGGACACCTTGTTAAAGCCAGATATACTGGCCAGTTTGAGATTTTTGTCTTT
AATTTTGGGACAAACTACGATAAGTCATTCATAGAGAACCTTGGAAGTAGCAAAGACCATGTTTTTTTCCTTGACTCAG
CCGACCAATTGTTATCAAGGAAAAGCGACTTTGAAAAAATATTTTGCAAAGATATCTAGTTTGGTGTCAAACAGCAACT
GCATGATTTTCCTACTCAAGAGACTAGTCCTGTGATAATTGAATTCATTCCTTATTTGTATTATAATGTACAAAATATG
AACTATTATTTATCATGAAACATTTTAAAATAATTTATTTTGTTCTCTTTTTGTATTGTTTTCAAAAGAAATTAATACC
GTC
>00125 2 reads, 1174 bases
TAGCCTTAAGAAAGATAACTTCCATCTTTGGCAACAATTTATGATGATAGCAATGAATGTGATGATGTAGCTTATCAAG
AGGAACTGCAAGCCCATGAACCCCCTCCCTCTTTAGTCCCTCGTATTCATGCACTACTCATGAGACCTTTACGTCACAA
TAATCCAAGTCTGCCTCCAATACCACAAGCTGATGTTTATAAAATTGCTGCTGACCATTTGATGGAAGATGCTTACAGT
CTGCGCCTTGAATTGCTAACTGTGCTTGGACATGCTTTATTATGTGATAGTCTTGCTGCGGAATATTTAGTTATGCCAT
CTTATTTCCAGTGTATATGCTAGAGCAGATACCCTACCGCTTGGCAAGCTCTGCCTTAACATCAGTGGTTGTCCAGTGA
CTCWGAGATACTCACAGTTTTTACACCATCTCATTTCCCAACTAACAACTCAGACAGCCCGCCTAGAAATGTCCATTGA
CAATATGAACTCACTAAAGTTAATACCAAAAAAAGACTATAAAGTGAATCGCATCACTGCGGGCATGCTTCAACTAGCC
CCTGGTACACATCTGGTTATTGATGAGACTGCTTTGCAGCAAGGGCAGCTTAACCATACAGGTGTATCTAATGTTAAGG
CCCTGGCAGATGTGATTAGATGGCAGAAAGTTGACTATGATTTTGAATGGCATCCAATACCTGTCCCAACAGATATTCA
TGTTTTGACGTTGTCCGAGGGTGAATCACTCCTTCCAAAAGATATTCACAYCCCACTAGCTGCAGATGGGCAGATTCTA
GATATCCCAAGCCATTTCTCAAAACTAGATACTCGACTAACACCTGAAAATTTAGACAAACTGAGGGCGTATATCACCA
TGTGCAGACTGATAGACTACACTGTATCAGAAGAAACACAAAAGTTAATACAAGATGACTTTGTTGAGACAAGACAGAA
CAATCCAAAAGATATGTCTGTTGAAGATTTGCAGATATTGCTTGGATTAATCAGGGTACTTGCACTCAGTTTTGGGAAG
GGAACTTCTACTTCTGAAATGTGGTTCAAAGTGAAGGCCATGGAGGAGGAGAGAAAAAGACGAATTTCACAACTTCCAA
GACAGAACAGAGAGACCCTATAACTATAATATTTRTTTGTCAGCCCTATTTTTTTCAKCATCRKCATC
>00126 3 reads, 1367 bases
CCCCTTATCCAATACCACGAGTTTCAATGATTCCACAATTTGACCAACCGATGATTCCTCAACCATTGGTTCAACCATT
GACACCTGCTGATATTCTTTGCCAAGGTCAAGTAGCTGAAACTGTGATTCCATTGGATAATGGTCGCAAATTTGTTGTC
TGTCTTGATAATGCTAAAGGTGTTGAACAAGAATGTCCACGAGGTCTCTTCTACTTCACTGCAACACGCCGATGCGAAC
GCAAAWCTGGTCCAGTTGATCCATGTGCTTCYCAACCATGTCTCAATGGTGGTCAATGCTTCCCCACGGAATCATCCTA
CCAATGTCAATGTGCTCCAGGTTTCGATGGACAAACTTGTGAATTAGATGCTCGTGCTTGCCAAACTCAACAACCATGC
GGACAAGCACCAGATACACGATGTCAATCATTCCGTTTAGGTGCTGCTCTTCCATTCATTTGCATCTTCCAAGAAGGAT
TAGCTTATGGTCTTAATTCTCAACAAGTCATTCCAAGCCCATGCCGAGATATTGATGGTCCACAAGCCTTAGCTGTTAG
CAATGCTGGATTCATCATGTGTGATTCTGATCGTCTATTTGTCGAATCTTGCCCAGGTGGTACAATTTGGGATGATGTT
GAAAAAGCTTGCAGCTGGCCTGACAAACAAACATGGGTCCCCGAAGAACAATCACGAATGATTGGCAAATCCAACTATG
GTAGCCAATACGGTGCACAACCACAATTCAACGTTCCCCGCCCAACTGCATCCTACGGTGGTGAAACTGTCGTTCCACG
AACATTCGAACTTCCCCGTCCAACCACATCATATGGTGCTCAACCAATGATTGAACGACCAAAACTGATTCCTTCATTC
AGCAATGACATGATCGTGAAGAAACAATTCGAATTCACCAAACCAACAGTATCCTATGGTGCTCCAATGCCCATTCAAC
CCACATTTGAACAACCAAAATTGATTCAAACTCATCAAGTTGAATTCAACATTCCTAAACAAGTTTCATCCTATGGATC
ACAAGTTGAAATTCCCAAACAACTTGATTTGCCCAAATTCACCGAATTTCCCACAGCACCAATGCCAGTTCCTCAACCA
TTCGAACAACCTAAACCAGTTTCATCCTATGCTTCTCAAACTCTTCTTCCTCAACAACCTGAACAATTCAAACTTATCR
GTCAACCACGCCCGGAATTCATTCCTACTAAAACCTCATCGGGTTATTAAATTCTCCACGAACAACAATCAGAAATGAG
AGTTGAGATTGATTTTCTTTTTATCGTTTTATTCTCTTTCAAACCTGTTTTTCTGGACGTGATTTTCTTGTTTTCTTTC
ATTTAAAACAAGWCATACATTCCA
>00127 5 reads, 1121 bases
GTCTCTAATAAACCACAAAAWSWWSSTAWTATCTGGGAGAATACATGTCTAAAATCAAACCACTGACAGATCTCAGTGA
GGAAATCGAGCATGTCCAAGCTGAATTTGAAAAGATGTGGGTCGATGGGTTGTTCCCTGGATGGCCCAAAGAAGCATCT
GGTGCTCTCACACACTCTGGTGCTCATCTTGACCTGTCTGCATTTTCCTCTTGGGAGGAGCTTGCCTCTTTGGGTTTGG
ATAGGTTAAAATCTGCTCTCATGGCACTGGGAGTCAAATGTGGAGGTACCTTAGAACAGAGAGCTCAGCGTCTATTTAG
TACAAAAGCCAAGAGTTTAGACGAGTTAGATCCAGCTTTGTTTGCCAAGTCCAAGCCGGGAAAAGCAGGAAAAGTTGGA
AAGACTAAAGATTATGAGAAACAAAAGGAAATAGCTCAGCTAGAGGCTCAGGTTTACAGGCTGACGGAGATGCTAAGTG
ACCAGAGGTTGGCCACTCGGGACAATGTCCAGCGGAAGCAAGCCCAAACAGGGGAGGAGAGGGAAGAGTCAGATGAGGA
GAAGTTTGAGGAGTCTGACTCCGATGACGACGGTGATGAGGCGCCCTATAACCCTAAAGATCTGCCACTGGGCTGGGAT
GGAAAGCCCATTCCTTACTGGTTGTACAAACTTCATGGTCTCAACCTGACGTACACCTGTGAGATATGTGGTAATCACC
CGTACAGAGGACCTAAAGCTTTTCAAAGACATTTCGCCGAATCCAGGCATGCCTTGGGTATGAGGTGTCTGGGTATTCC
CAATACTGCTCACTTTGCAAACGTCACATCTATTGAGGATGCTTTAGCATTGTGGACCAGGATCAAGTCTGGGAAGGAA
GCAGAAAGATGGAAGGCAGACACAGAGGAAGAGTACGAGGATTCACAGGGGAACATCATCAACAAGAAAATGTACACGC
TTCTCAAGAAAGAAGGCATCTTATAAATGAAAGCATCTTTAATGAAATCTCTCGTTTTTCTACTATTAAGCTGTGGACA
TTACTCATTTTAATGAAGTTGTTTTTAAAAAATGTCAGTCGCCAACAATATAAAAAAAAAGTTCACATTTTATCAAAAC
ACAAACTGGTGTTTT
>00128 2 reads, 785 bases
CACTACTATACCCTAGATCTTTCACCCTTCATGGCGAAGAGCATTGATGCTGGACCAGTGGATGCATGGACAATTGCCT
TTTCACCAGACTCTAGGTTTTTGGCATCAGGAAGTCATACAGGAAAAATAAATCTGTTTGGCGTCGACAGTGGAAAGAA
AGAGTCTTCTATGGACACAAGGGGAAAGTTTACACTCAGTCTTGCATATAGTCCTGATGGGAAATTTATAGCCTCTGGA
GCTCTTGATGGAATAGTCAATGTATTTGACATCACAACTGGAAAACTTATTCACACACTGGAAGGACACGCAATGCCCA
TTAGGTCTCTCTGTTTCTCACCTGACAGTCAGTTACTGATAACAGCTTCTGATGATTGTCAGATTAAAATATATGATGT
CCAACATGCCAATTTGGCAGGCACATTATCCGGTCATGGATCTTGGGTCTTAGGAGTGGATTTTTGTGCAGACAACACC
CATTTTGTTTCAGGGTCCTCTGACAAAACAGTTAAAATATGGAATGCTGGAACAAGACAGTGCATCCACACATTTTATG
ACCACACAGATCAGGTTTGGGATGTGAAGTACAATCCTGCAGGCACAAAAGTTGTATCAGTTTCTGATGACAGGAATGT
TCATGTTTACGACTGCCCTGTTTAAAGACATACAATGTCACATCTGTGAAGATTGTGCGTGTGAGAAAGTGTATGGCTG
AAAGAAAGATTTTCACTCTGTATTCATTATTAAGACTGTAATAAAAATCAATTTCGGAAAATTTTTTTTTTTTT
>00129 3 reads, 959 bases
ACCTCAGACCACTTCTTCAACTTGWGCGMKCATATCTGTTCCTGCTTCACACTTGATGTTATAGCAAGTACAGGATTTG
GTCTTGAAATCAACACCTTGAAAGAACCTAACAATGAATTTGCATCTGAAGCCAAGAAAGTTCTAAACCCAAATCCATT
TTTATTCATAATGCTCTTATTTATACCTGAGTTAACCAAATTCTTCTCTAAACTGAACATACCCATACTGCCACAGAAA
TCAATGCTGTACTTTGCAAAAGTCGTAGACATGGCAATAGAGGAGAGGAAAAGAGATGGTCTCAACGGGAAGGTTAATG
ATTTTCTAGACCTTGTCATGAATGCTGAGATGGACGAGACTGACAAAGATGGAAGTCATAGTGGCAAGGAGCTCACAAG
ATCAGAAATTCATGCTCAGGCTATTGTCCTCATCTTTGCTGGCTATGACACAGTGGCTACAGCGCTGTCCTTCACTTTG
TTCCTGTTAGCCATGCATCCAGACTGTTGTCAAAAGGTCCAAGAAGAGATCGATGAGAAATGTGGTGGAAATYCKCCCA
AYTATGATAATGTCCAGGGCCTCAGTTATCTGGACATGTGCATCAACGAGGCTATTAGACTCTTTCCTCCAGGCATATT
CATCAACAGAACATGTGTCMAAGACACAGAAATCCATGGAGTTCACATCCCAAAGAATCATGGTTGTACTTATCCCAGT
TTACGCCTACCATACAGACCCAATTTTTTTTCCCAGAACCTGAAAAGTTTGATCCTGAACGTTTCACCCCAGAGAACAA
ATCATCCAGACACCCTTATGCACATCTGCCCTTTGGACAAGGACCAAGAAACTGTATCGGAATGAGGCTGGCTTTAGTG
GWGWTAAWAATTGCGATAGCTGCAATATTAGGTAAGCTGACCCCGGTTCCTTGCAGCAAGTCTGTGTATCGACACTTCG
AGTCATTTTAC
>00130 2 reads, 1279 bases
CTTTTTTTATTAAGGTAATTWATATWCASWGTTAAACTCTCTTTAAATTGTTACTTAATTAATCTTTGACATATTCAAC
AACCTCCACCTTAAATTAAACAAATTTTGAAGAAATTCAGATTTCTGAAAAATATAAAAACMTTTTGAGCTCTGTTGAA
ATGTATTGCAATAAGAATGGCAGACAAGAGACAACTAGTTATCATCTGTTCATGTTCCCTCTTTATTTTGATCAGGCAG
TCTCAGATAGTTTCAAGAAAAATTCATTCAAAGTGAACATTATTTTATTAGTCATATTCCTGAAGATGCTATCAAACTG
ATGCTCGATCTATAATAAGTTTTTTCAAGAATGGAATTGAGTGCACAGTGTGTAGGCCTAAACTTCGCAGCAGTACCAA
AGGTGGGAAATCAGTGGAGTAGAGCCGCTGAAGACCGTCTATTGTTAGSATCACTGGGACATTGTGTCTCTGTCTCTCA
GTTTCATAGTCCAAAAGATGGGTCAGAGAACCCAGATCTGCTCCATTTTGCACAGCTTTTGTTAATATTTCATTGAGAC
ATTCAACATCACCGAAACCAAGATTGACCCCTTGACCTGCGAGGGGATGAAGCCGGTGTCCAGCATCACCAATAAGTGC
AACTCTTGGTTTGACATACTGAGATGAATGGATGAGAGATAAAGGAAATGAAGCCCTTGAACCTTCTTCAATATTTATC
ACAGTTGGAGGGAGCTGTCTGGAAKATTCGGAATCTTGCAATACATTGTGAAGAATATTCTTGAAAACATCAAGAACTT
GTCCAGCCAGTGCATTCTTCTCTCTTTCGTGCCACAAAGCATCATTAACGGCATCCACAAAGCTGTCACTAGGTATTTC
CAGCAAATGTTTTGCATTTTCATGTGTAGTTGTCCAGACAAGAGAGGACAATGTATTACTCATAGGTAGTAGTGCTATT
GGTCCAGTGGGCAAGAATCTTTGCCAAGCCGTATCATTACTTGTGGTATCACCTAAAATCAACGTTGCAACAACAGCAC
TCTGGCCATAATCCCTTTTAATTGTATGAAAGCCAGCTTCTTTGCGGACAACAGAATTCATTCCATCTGCACCAATCAA
AAGCTTTGCTTTAAGGACTGTTCCATCGTTCAATGTCAATCCAGCATAAGGCAACTTCACCGAAGATGGGTCTTTACCA
TTAATGTTGCTGAAAGATGTTGCCCTCGTTTTATAACGTACTTCCACACGGTCACTCATTCTTTTAAGACATTTCATTA
TGGCAGCTAAAATAA
>00131 5 reads, 1129 bases
TACAACGGAATGTAAAAAAAGCTAGACACATGACATTCASATCGAAAGAATTTCAAAGTGCGCACACATCAGCAACGGT
CTCTGAAAGGGATCCGCTTCCAATTTTCTCGGACAAAAATGTACAAGAACTCTTGTACAGAATCACGGGGTTTGACCTC
ATAAAAGTTGCTGGACCTCAGAAAAAACCTCTCAAAGCACCTGCTTACAAATTACTGACAGATGAAGAGTTACAAAAGG
AACTCCAAGAAGCCAGGACAAAATTAAAAGGTCGACTCCAAATGCCCCCTTATATGAATCCTCAGAAGCCGAACTTAAC
CCCTTTAAGTGTTGATCCAGATTTAGCTCACTTTGACTCATCCACTTACGTCTTTGTGGATATATCTTTTGGTGTCAAA
GATCGAAAAAGAAATGTTTTAATTAGAGAAACTGACGGAACATTGAAGACAGCTCCATGGGATGTCAAGGAACGAATGA
ATCAGATCTTCAATCCTAGAAAGGGCAGGCATTACATCAAGCCAAAAATGTTTGAGGAGCAGAGATTAGAGAAACTGGT
TGCGGAAAAAAACTACATCTACATCCTTGACAGGGCCTGCTGTCAGTTTGAGCCAGATGATCCTGATTTCATACGGAGT
ACCCACCGAGTGTACAATGCCATCAATACGAATCGAGACTACAACATCCTGAGATCTACTCGCCATTTCGGATCTTTGG
CCTTCTACCTAGCATGGAACCGCATGATTGATCATTTATTGATAGATATGATCAACAGAGATTTGTTGTCAGATGCTGT
TGATTTGATAAACTTATACTGTATCATTCACCAATCGAGTTCATGTACACAAGCAATAAGCCAATTAGATAATCCCGAT
CAAGTCGACATCGTTCAGACATACATTCAAACTGAAGCAACCATCAAGCCACAGTTGGAACTCTCTCTCCAGGCGTACC
AAGATGCCAATAAAAACAAAAAGAACAGCAATTAGAAAAGTGTATTTTTGATTTATTGTCACTTTCAGACTAAAGCTAA
TGTCTACACAGGAGATCTGAACACCAAGAGGCAACAAAAAAAAAGTAGACATAAGTTTATAAAGTTTGACCATTAAAAA
ATGTGTAAAAGAGATCGGAAGAG
>00132 2 reads, 1058 bases
CACAGACTCCCCGCAGCTGACGCCCGGGCGCTGGTCAACGCAAGTGAAGCCGTCCAGGAGGATCTCGGTGTTTCCATTC
TTGCTAACCCTCGAGTTGAAACCAAATTCGGATTCCTCCCCGAGTACCCAGAAGTGATTTTAGAAAAAGGAAACTTCCA
GAAGGTGGACACGTTAAGGGGCTACAACTCAGGCGAGTACTCGTTCGTTATCAACGACAAAGACAACGACGGCATTACC
AGAGATGAGTTCATCGAGTTCTTCATGCAGATCTCTGAAAATTACGCCTACGAAAACAAAAGCGTCGACGCGCTCCGTT
CTCTGGTGGAGGCCGAGTACCTTAAACAAGAAACACGGCCGCTAGTGCTGAGAGACGCCCTCATTCGTGGGCTGACGGA
CATACTGTTTGCGGCGTCTGAAGTTCTGGAACTGGACAAGATCATCACGAAAGGAAGCCCGACCTCGAACCATTACTTG
TACCAGCTCAACTACATCGTCGAGTCGCTGCTGAACGTACAGAGCTTCCTGCCTCACTGGATGGGGGCCCCTCACACGG
GCGAGCTCCCGCTGGTCTTTGTGGATGACTCCGCCTTTGCCGCCTTGCTGTCCACGCAGGCGCAGAAAGACGKGGGGAA
TCTGGTGCAGACGAGTGTGGACCAACTTCGCCAAGTACGGCGAGCYCWCGAGKAATGTGACGGGAGTGGACTGGAGACC
GTATTCAAGCGTCCTGCACAACATGCTTGTCATCGATGTGGCTTCCAAGGCCAGCTCCTACCCCAGTCCCCAGGTCATT
CCACTGTATGAGAAAATCTTGGCAGTTCTCTAGGCAAATATCAGTAAAAAAAATTAGCGTTCTCTAGAAACATATTAGT
TAATCTTTGGAGCTATCTAGAGAAATTTTAGTTAATCTTTAGAGTTCTTTAGGGAAAAACGAATAAATCTTTACAGCTC
TCTAGGGAAATATGAGTAAATATTTGGCGTTCTCTATGGAAATTACTGCAGAAATTCAGCCACTTTGGCCTGCCAAGTG
ATGCGTGTTGTTGGAAGAGCGGTTCAGCAGG
>00133 6 reads, 1197 bases
GAGGTTGGAAGAGTAAAATTAGTCAGKSMCTGGTTTCCTTCTCAACGCCAACTTCAGTAAATATCGAAATATGTTTGCA
TCAAATCTTGTGGGTTTGGTCGTGGTGTTCGCAGCCGCGGTGTGCAGCGTTGATGTGGTTGAGGCGTTTGAATACCCCA
CGCCATACTATTGCTCTTCAATAACCTCACTGCAACTCTGTGGTAATGAGAGCAACTGCTACTCGTCACCGACACGTGG
GCAATGCTGTGTAGTCATTGTGAGGTCAATTACTGGATCACTCCTCCAGCGTTGCTATTGCCTCATGGGCGTGAAGTGT
GACAGGACCCCCACGGAAGGAACGACATCGTTGTCCCCTACAAGCGAATCCCCATCAACGGTCGCCACGAAATCGACAT
CAAATGGTGCACCGCCCTCCGGAAGCTCATCTGTCACGTCATCTAGCACATTGACAACAGAAACGACTACAGCAGCCTC
ATCATATTCCCCATCTGCGAGCAGCAGTATGACAACCGTGATGGCCTCAAATTCCGATTCTCAAACCCCCACCTCTAGC
AGCCAAGCCTCTGATACAGCATCCACGCAAAGTCAAACAACACCTGTTGTGAGTTCCAACACTTTCATTTCCTCAACTG
CTGCGGCAACGTTCTCAAACCTCAGCACCGTTTTCCCAGCAGCCGCACCAACCATAGCCCCATTTTTCTACGACACGCC
GCTGTGCTGTGGTACCAACGTAAAAATGCCTATGTTGTGCTCAAGCGTCACCTCCTGCTATTGGTCAGTCACTAGAAGT
AGTTGCTGCTTGACTCCACAAAGATTGACAAATGGTGTCGTGAGAAACCAATGCAGGTGTAACGGTGACATTACTTGTC
TGCCCTAGTTATCGGACGGATCGACGGTTCTCAAACAGGTGAAAGATGAAGCGTCGTTGGATATTTGACTGGTTCTCTG
ACAAGCACATTTATTTTTGTGTTGATGATATATTTTTCAAGCAAGTTTAAGTCGGCACTTTAAGAAGAGCACATAAAGT
GTCTTACTAATTATTTTAGACCCCATACTATTGAAAACGGTATTTGAGACACGCAATTTCCAGTGTATCCTAGTAAATC
TTCACAATTCGACATAACACACAAACGCACACGCACTCACACACACACACTGCAACACACACTCACACACGCACACATA
ATTTTAACACAA
>00134 5 reads, 1085 bases
TGAAGAAGTCGTCGTTGTTGCATWMSGACYGGTACTCAACAAAAAGTAACTGGTATAGCTACAGGAAAGGCTGGCCAGC
AAATACCACTCCTGATTCCACAACACACGAAACTGAACACAGTGTTAACAGGCAATCAAATACTGCATCAAATAGGGAT
TGTGAACAAGACTCCAGGAGGCATCCAGCAAATAATCACACATGGCACCCAGCCTACTATTCTCACCCAAGTGTCACAG
GCTGGAGGTCAGCCCATCCAACAGGTTGTTGCTAAGGTGTCTCTACAATCCGGGAACCAGACCTTGACAGCTGGTACTC
CAATTACTGTAACACATGTCAGCTCCACTGCCAATCAAGGTGTGGGGTTAAGCCTGTCTGGTCAAGGAGCTGTGAAGAC
AGCAACCATTCCCTCCTTAGATGCTGGAGCTGGGAGCATTCAAGTGCACTCCATTCAACCAGGACAGAAGACAGTGACA
AATCTGCCTCAAAGTTTAGTCACAACACAGACAGTGCAAGTGCAACAAGTAACCAGTGCACAGGGCAGTTCATTTTTAC
AAGTCACACCAGCAGCTGCGCAAACACAGGCATCAACAGTTCAGCAGCCACAGGCATCAGTTGCTGTACCAGCCAGTTT
AGTGGCTCTAAGGACCACTTCTACAACATTATCTTCAACACCTCGCTCTCAAACTCCTACTCAGATCAGCTTGGTCTCA
ACACCTTCACCTGTGGCAGCTACTATTGCAGCTGTGCAGGTCCAACCTGCACCACCTGCTGCAGATGTGTCGACCACAT
CCAAAGTCATAGCTCAGAACGTATCAACAGTCCCTCCTACACAAACTAGTCAGTCTGATTCCACTCAAGGGACAGGACA
GAAAGCATCTCCATATGCAATGAGGACTAGAAATACCAAACACTAGATGATATCATATAATCATTTAAAGATGGCCTGC
AATGAATGTTTTAAATGTGTATAGTAATAGTGTGCATTGTTGCAAGGGACCATAATTATTTCAATTCTGGCACTAATTG
AATTATATCCAACTAAGTTGTAAGAATTTATATGCAATATAGTTATTTTGTGATGGCG
>00135 17 reads, 1233 bases
CTTGCAAATAAAGGCATTTACCTTTACGTGTGGAAAAAATATTTATTAGGTAAACAACAGGTAACATTTGATTGATTTC
TTCCAGCATAAGTAGTTCAATTCAGAGCAGTAACAGTCCAGAACAGTCAAATCACTTGTAATCACTATCAGACTTAAAG
CTGTCACTCATGTGCATTGTTACTCATGTGTATTGTCATAAAAGTATTTACAAAATGAAACAGGTAAGTGTCACAATGC
ACAGGTCAGAAACGTAAACAGGTGTGCATCAACATTGGCCCATTGAATATGCAGAAGCAGTCAGATTTCAATTCTGAAT
ATTGTGGAATTTTGCAAAGCAGCCTTTCTCTTTACAAAGAGAAACTTTGCAGCATTCACACTCCCAGGACGTTTGGATC
TTTCTTCCAGCAGTTGTTCTATCAGGACCGTCTGCACAGAGGACACAGGTACGGAGGCCACGTTTTGTCTGAATTTTGG
TTGGCACATGGACAGGTGGCTTTTTGATGACAGGAGGAGAGGCTATCATTTGTGAGCTTCTCTTTCTTGATGTGAAGTT
GTTGATGAGACCAGTGGCAACAGAAAGGTGGAAATCCAGGTGTGTCAGGTGTTTAGAGCGGGGCCCACCTGGTGCCTCT
ATGTGCAAAATGTATGCGTTGATCATGCTGACGTCTAGGATGAACCAAAACAAGTATTTCCACCACTTCTTTGCTTTGT
TTGCAATCCCATAGTAGGAGCGCAGCTGGGCATTCTTCTCAACTGCATTGTGGTTGTTAGTGTACTCTTGGATGGCTTT
GGGCTTGAGATAGACGGTGTCAGGCTGCCCACGCTTGCCGCGTCGAACACGCTCCAAATTTCCAACATCATTGGCTGTT
GACAACACACTAACCTGTCTCTTCTTTTCACACCAAGTCACAGCTAGAAGCTTTCCTTTCTGCACTTTCTTCATTTCCC
CATTGTTCTTCAGTTTGCAGGTTTTGATGGCAACAGGTAATCTTCTGCGATTGTGTCTTACAGCGCCGCATGAGTAAGT
CTTTTTTCTTAGCAGTGTTTCAAGGAGGTCAACAGAAGTGAAAAAATTGTCAAAGTAAACATGATGAAACTTATTATAG
AAAGGTCTTACCAGCTCACACACAACTCTAGTACTGAGTGGGACATTGTTTTCACAGGTTAGACTCTTTCCAGTGTAAA
TGTTGAAATCCACCAGATTCTTCGAAAGACGCAGTCGTTACCGGGTTC
>00136 6 reads, 1479 bases
TCGGCATNCCTGCTGAACCNCTCTTCCGATCTATAANATNCGNTGCCAGCAAAAGATTGCTAACKTGAACTGMTWATAT
TCACTTTTATCTCCATCTAAATTGAACAATTTTAAATTTAGAAAACAAAAAATTAATTAAGAATGATCTCGATGATTGT
TCAAAATAAAAAGGTTTTAATGAAAAATCTCTATAAATTTTTTAAATATCCCCTTATTTTGCAACGTCCTCTGTACACA
AATTCAATAGTTGAATGAAACCTTAAAGTAAAACTGGGGAACCACTTGCTCAAAGCCATTACCACCAACTCGGTGGTTC
TGATTCTCTAAGCACTAAAGAAGAGGCGACTGCTTTCTCAAACATTACTTTCAAGATGGAAGCAGTTGCATTCTTATTC
TTACTATTTAACTCAACACAGATTTCTATTAGATGGGAATAGAACACAATTCTGGTATGATTCTCAAAAACAATTGAAG
TTAATATAACTCAGAATAGCATATGCTCATATATCTTGTATATCAAATGAGGCAGCATTGAAAACACCCATTGACAGAA
GGGTTGCACCACTATGTTGGCAAAGTTTTCTTCTTCTGATAGGCAGTGAGCTTCTTGATCAGTTCCTCTTTCTCTTTGT
TCAGCTGCTGTATCCTCTGTTTGTTGGCCTGGAGGCGACACTCCAGGTTGTGGAGGAGGGGACCACTGACCACCTCCAT
GACATGACACAAAGACTTGGTGTAGACTGACGTGTTGTGTATCCGTGTCAACAGATCCTGTGACTCTATGCTGACCCTC
TCGTAAGCATCATCCTCCTCCTGGAGCAGAATTTTAGGCAGATCGACCAGTGCGTCCAGACAGGGCTTCCCAATCTGGT
AGCTTGGGGCTATGAAGAGTGGCACCTCCAGACGCTGGAACTCAGAGTTGACCTCCTGTGACTGAAAGCATGTGACCTC
AATCTTGTTTTGTTTCGTTAACTTATCCTCATTGAATACTGAAAATATGAGTCCCACAAAACCATCATCCATCTGCTGG
TAGTTAGCCTGTGTGCGCACATCTACATGTGACGGCCAAACTGTGATGTGGGGATGAGAGTGATACCAGCCAACTACTC
GCAGTGGTCGATTCATTTCTTTGGCCAATTGCTCAGCTTTGATAGATGCATCTGTCTGCTGCTCTGGAGATATCTCGAC
TCTATCTGCTTGCTTATCTGACCTCCGTAGAATAATGAGGGATGAAATATGGAGAACCCTTGTTTCATCAACCTCGCCA
ATTAAGAGTCCCATAACTTCTTCTCGTTCTGTAGTAAGTGCATGCGTAAGACACACGAAATATACATCCGATCCAAGAC
TGACACTTTTTAAACTCATTTTATTGGTTTTTCTAGAATGATTATAAAACTTTAAGGATGACAATTAATTCACTTTAAA
CGTTCATCTAACAACAGAGTTACAAAGACTACACACAGTAGTCCTGAGTAGTGAAAA
>00137 12 reads, 887 bases
GTCATGACACAGGAGTTTCTWWGAACTTSAAGCCATAGCAAAGAAGGAAGGCTTTAATTATATTGAAACTTTGACTGGG
TTCAAGTGGATGGGAAATAAGACCGATGAACTTCTGAAAACTGGAAATTATGTTTTATTTGCTTTTGAAGAAGCTATTG
GCTACATGTGTGGTTCATTTGTAATTGACAAGGATGGCGTCACAGCAGCTGCTGCAGTTGCTGAGCTGGCTAATCATGT
CTACTCTGCTAACTCTTCACTTTCCCAGCAGCTAGAAATCATTTACAAAACTTACGGGTATCACCTGAGCCAGAATTCA
TATTTCATCTGTCATGATGCACAAACAATTAAGGACATGTTTGAAAGACTTCGCAACTACGATGGAAATTTCAATTACC
CAACAAAGTGTGGTGACTTTGAGATTGCTCATGTGCGGGATCTCACTACTGGTTATGACAGTGAAACTCCAGACAAGAA
ACCTGTCCTCCCCACCAGCAAGTCAAGCCAGATGATAACTTTCAAGTTTGCCAACGGTTGTGTGGCCACACTGAGAACA
AGTGGAACTGAGCCGAAAATAAAATATTATGCTGAGCATCGACCCAACCCTGAGTCTGGCCTTGGCTATGAAGAAGTTA
AACTACAGCTGAGTGAGATTGTCAAGAATATTGAAACCCACTTCTACAACACAAAGCTCTTCCCGAAAATTTTGCCACG
AGAGCTGTAGATTTATGTCACAAATTTTCTTGAAAATGCAGAGGAATGCTTTTGCAATGAGAAAATAAAGGGTAAATTC
AACTTCCATCCTGCAGATATATTACATGGCCTTTGTGATGACTTAAAATAAAGACATCTATTCTTTTTGWGTTATTTTY
WWWTAAACTGTGATTGAT
>00138 9 reads, 1853 bases
TTACCTGTTTGGTCACGGGAAAAGGGAAAASGCWWWRYAGCAGTTGGCCCCCAATGCCCCTGACCCCACAATATCCGTT
GGATTCCCTGACATCAGATGGCACCAAACAGCCGACCACGGCTATGTACCAAACTCAGATTTACCCAATGTTTTCATGG
CTGTTGCTTTGGATTTACCAGATTTCACATCATCCTATGGAGCGATTCACCCGAGAGACAAGAAGGATGTAGGTGAGAG
GTTAGCTCTCAGTGGCCTTGCGGTAGCCTATGGTCAGTCAGGGATCTTTCAAGGACCCCTTCCAGTCCAAGCCACGACC
ACATCAGCTGGACTTGTTGTGGATTATGGCAACACTTGGACTCTAGATGTCAGGGACTTGAATGGCTTTGAAGTTCAGT
GTGGTGACAGTTGGGTGCTGACAGACATCATCACTAACAATCAGACCACGGTGACCGTGTACTCTGGTGTCTGCCAGGG
GAAGCCACTCAAAGGTCTTCGATATGCCTGGCGTGAGTCGCCGTGTGCATTCATGAAATGTTCGATCTATGAAACCAGC
AGCAACTTGCCTGCAGCACCTTTTGTGGCATTTTCTAAAACCGTCAACGGAGAAACTCATTTTAAATTTGATGGCCCAA
TACACATCTAGGGCTAAAATGTTCTTTGTATTTGTATATCCTTAGCTTTTTAAACATTCTTTGTAATCTCACATAATAG
TTTCATGACATGCATGTTATTTTCAGCTGTGTATCATCTTCATGCACAAGATCCAACCATGAGCTGATGCTAAGTGTTG
TGATTTAGATGTTGGTAACTTTTTATATCACTCACTGCACAAATCAGWGTTCATTTAAGCAAAATATGGAGTTAAAAAT
AAATGTTATAATTCTAATTTCTATATTGACAACCCAAATATTTTATTTGTATCAGGAGTCTGATGGTGTTTACCTCAGT
TTATTTGGTGTATGCTTGTGTATACCTCAGTATATACCTCTGTTCAGTTGCATTTATCAAAGTTGAGTTAACTGTTAAA
TTCTGTGTCAAAAATGACAAATATTCATGACATTCCAATGGCTGTGATCAACAATTAGATATGTTGTTACAACCGTCTG
ATGTATTCCCTTACCAAATCTATGATCACCTCCACAATCATCCATTTGCCAAAATGAAGGTTAGCGTTTAATGCCCTAG
AAGGTTTTCGCCAAACTTCCGCCTCAGTCCCGTAAGGATTTCCAGTCTATTAGTATCAACTGGTTATGAAATTTAAAAA
ATTGCGTATAATTTATTTATATTATTATTGTCATACTGACTTCATTCTTTAGGATAAAAATGGTTATATTACGTATCCA
AAAGACCTTCTGGAGCTTAATACTATTTTTACCCGTAGTTTAATACTATTATTTTTACAATAACAAATAGCGANAATCA
CATTTTAAAAAAAAAAACGTAAAAACTACAAAAAAATTGCGCGAATCGAGCGATAACAGTAGTGAGGTCAACGGCCGCC
ATTGCCGGAAGTTGACTGAAGAATTTCTGCTCTCTATAATTTCATTACTAAAGAGAGTGCTATCGAGGCGCGCATTACC
TCGCTTTGGGGCATTAAACGTTAATCATTAAATGTATAAGAAGTTTTATTTTTAATAATAAAAGGATGTCGATATTAGC
ATCAATTTTTACACAGTTTGTAATTCGTATTTAAAAATAAAATGATTATGCGTGCATACCCTTCTATTTTACACATACA
CCTCTTTGTGCTGGACTACTTTATGGAAATATTTAGTACCAATGTCAGGAGGCAGTGATGATGTAGAAGTATTACCTCC
CCSTGTTCTAGATGATCAATTACAATTCAATCGTTT
>00139 53 reads, 1072 bases
AAAAAAAATAGGGATAAYAGGGTAATACTCTCCCTTTGTTTATCCGGTAAAATACCAACAGTGGGTGTATAAGTATAAA
TATAATAATTATTAAAGTAGGCCTATAGTGTATCGTAGTTAAGACGCCGTGGGGCCGGTATTTTGTACTTTGATCTTAT
TGGCCGACTTAGATAAGAGTTAAGGCTTGGCTCAGTGTGCAGAATTGTGCTGGCAGCTAAGAGGAATGGCAGGAAAGAG
ACAAGTAGCTAATGCTCAAGTTGCTTTGCAGCACAATATCGGTCTTGGTGGAGCGGTCGTTGTTTCCTTGTATAGACAT
GGCTTTCCACCATCTTTAACTCGAGACATTCAGCCAGCTGCAGTCAGTGCATCAATTGAAAAAGATTTTAAATCAGGAG
CTCTGTTTTCAGAAATCCAAAAAAGATTAGAGCAGGACGGAGCTAATATTGTTAAAAAGATGAAAGCTGTCTTCTGTTT
CAAGGTAACTGGACAAGAAGGCAAAGAAGCTTCATGGATTGTAGATGTGAAAAATGGAAATGGCTCTGTTAAATTTAAT
TCAAATGAAAAGGCAGATACAACAGTTGTCATGTCAGATCAAGATTTGTATGACTTAATGACAGGCAAACTCAACCCTC
AAACTGCATTTTTTCAAGGCAAGCTGAAGATAACTGGCAACATGGGATTAGCCATGAAATTAAAAGAACTCCAGCTTAA
GTCTGATGCCAAGCTCTAAATAACCTATTTAGACAAATTACAATTATTTTTGAAAAAACCAATAGTGGATATCCAGTGC
CTCATACATATTTCATTAAAAAAGGTAATTTAGTGATTACTTTCCATTCCACAATGCTCTATTACAGATTTTATTTTTA
TCATTATAAGAAGGTTTAGAAAGAAGACTTAAATTAAATGTAACTTTATTAGACATTTAAATTCCTTTTATTTACAAGA
TTTTTACTCTATGGGACTTCATTTTATCTATCTTGTTTATATCCTCAAAATGTATTTGCATTGTTTTTTCAGATCTTTA
ATTTTGAAATAAATCCTTTTTTGTGTAATTATAATAAGATTTAAC
>00140 3 reads, 1124 bases
GAGAAAGGGATGTACTGCGRGTAAKRCTAGWTAACCGTTTTGTTATCCTTCGGAACATAACCCTTTGTTGACTTGGGTG
TACAAAGGGTCCATAATGGTGAAGACGAGACACAGTGGTGATGTTGATGTCGAATCGCCACCTACATTTTTATCCCTTA
GCAATGAGAAAAACCGCCTGGCGACGCGCAGCGGTGATGCTCTAGCTAGTGGTGAGGACAAAAATGTCTCTAAGACATA
CAGAGAGGACAGAGATGCCTACAATATATTTAATGAGAAAGTAGTAGAGTCACGATTGAGGCCTCGTATTGGTCCAAGG
AGAGCCTACAATTATCTTGACGTTGAATCATCAGATGAAGATTCATTGAGACGACAAGCACATCATTCTATAAATTTTT
CAACAAGGCAGCAAATGTCACGATTTACTAGATCAAATAGGATAAAACAGGAGATCGAGACTAAGCATAGGAGCAACCG
AGACAGATCACAGAGAACTTCATTGCACGAAGACCAAGAACAGTCTGTAGAAGAAGACGATGACGACAATGGTGCAAAT
ACAACTAAAAAATCTCAAAATTGTGAACTTATTTCTGACAAAAAAGCTGGAAGCAGGAGACGTCAAGTTAGGCCAACTC
AAAAACATCAGCACAGTGACAGTGATGAATTTGAGGAGGAGGAAGATGATGATGAAATTGAAAATAGACGCAGGAAATC
AAGGAGGCGTCATGATGCGTCAGATGATGAAGAGGATGAGACAGATACTTTTATACGTCGAAGTTCACGCACCAGACGT
CAGGTCTATGACACACTCAACCAGTCTTTTCTTGTAAGTCGACCTGGTCAGAAAACGCGTGCATCAGAAGAGGGTGATC
AGTCTGACAATAAGGATCAAGAAGACAGTGAAGATAACAAGGTATTTTCTGACATGTACAGCCGTGTTAAGAGAAAGAG
AGTTCAAGTGAAGCGGAATATGTATGGGGTGCCAATTAATGATGACTCAGACTCAGAACATGATAAACGGGGCCTAAAC
AAAAATAATAATAAAAATGAAGACGATGAAGATTCACAAGGCAACAGTGATGACAATTTTGATGGTGATGATACAGAAA
ATCAGGCTGACAGCAAAA
>00141 10 reads, 1350 bases
GGTTTCGTCTAGGCATACCTTATCGGTCCCTCAAGGCCACGAACAAGGTCAACAACTGCCCATGGCTGATCTACAGGAT
GAAACCGAACCTGCAGAAGATTGTCAATGTCTACAACATCACCGGAGGCGCAGAGGCCAATAACTTGGACGTGGAAGTG
GAAGTAACGTACACAAGTGACGAAATCAGTTACACCGCCTGCTGTCAGTCTGTCACACAAAGAGCAAGATCCATCTACG
TGGATCCACTGAGCTCGGACTCCATCAGCCCCGTGTTTGTGAGAACCGCGCCATTTGTGAGGCTGTCTGCTGTCAACAT
GTTGGACTCCAATTTTTTTGAAGGTAAGTTGTACACGCTGGTCCTGCTTGACGTCACCAACGCCATCTTGACGCCCAGC
TCGCGAGTGACGTCACTGCTGTGGTTCGTCATGGACATCCCTGGTCAGTATGTGGCGGACGGCATGCAGCACGTGGGCT
ACATCTCACCGGTGCCACCGCTTGACCGCTCCACGGACTCACTGTACGCTTTCCTGGTCTTCAGGCAGAGAGCAAGACT
CATGACGGGCTTCAGCTTGTCGACCTACTGCACCGGCTCCAGCCCGTGTAATCTGAATATTAACCAGCTTGTCCTAGAC
CACAACCTGACACTGAGCGGGGTCAACTGGTTCACGAGCAGAACTGATACGTACAGCAGAATGAAACTCTATGACACCA
ACAAAGATAAGGCGTGCGCCGGTGTGTCGGGCTATGGGAATCCTTGTCCAGACCCGTGCACAACAAGCACCATGGCGAC
AACAACAACGACGAAGAGTAATTCCAAGAACAGTGCACTCACTGCGACTCCTGGAATAGTCCTGTCTATAATTGTCTCC
CTTTTGTCCGTTGTAAATATAAAATGGCGATTGTTGTTATAAATGTTTGGAAAGTTCCAGCGGAGAACGTTGGGCGCAA
TTTTCTTCCATTAAGTAGGATCGTCTGTAATGTATTTACTTAAAAAAATTCGGCGGCCAATTTAATCAACATATAATCC
AAATTTTGTAATCAACAAATTATTTCCACCTTCATTCTTGATATTTTAAAATGCATTTTTAAAAATTTTGTGAAATTCA
TCATAGCAAAACGGGGAAGGGAGTATAAAATATTCACAATTCATTTTCATGTATACCATGAGCAATGCTCCCTTTAAGC
TGCGTCGGCCGCTTAGATCTTTGATAGACGCTGTGCAGCAGTTAGCAATTACCATRCAGGAAATTTGTAAAACATTGCA
TAAAAAATGGATGCTGTGCAACTTTGCCAATGAGTTGTTTTTTTTAAAATTCATTTTGCACACAGAGCAACGAACCTTA
GAGGGAA
>00142 10 reads, 1084 bases
AGCCGATAGTTTAGTACTGAATWWCTAGATCAGGGATAGAGTGGTCCATGAGCTTCTTGACAATACTATTACCCATACA
TTTAACCATGTGATCATACAAGAAAGAAGGCATTATTGTAATGGTGACAGTTCTTCCACATGACTCAATTATCTGGTTT
ATCTCTTTATCCTTTAAGCCAATAACATTTTGTCCTCCAACTTCAATTAATTGATGGTCAGTAAGGAGACCATTACGGG
CTGCAGATGAGTCTTTCACTAAAGATTTAATTCGACCATCTTTGAAGACAAAGCCAATGAAACCATTGCTGTCTTTCTG
CATGGTGATAGTACGCTCAAATGGTCTGTCTCTGATTGCCATTTCAATTCTTTGACCATCAACCTTCTTAAGGAAATTG
TGTGCCTTGTCATTGTCCCATCCAGCAACTGTCTGACCATTAATTTGCAAAATCTGGTCACCAAACCTTAGACCTGCCA
GTGCTGCTGGCAACCCAGCTTGAACAAAAGCTACAAAGAGGCCATTGTTGATATGTCTCACGCGTAATCCAAGCTTGCC
ATCTTGGTCCTTGCACAGAATAACTTCTCGAATACCAGATTTAATTTCAGCTCGCATCAGACCTAAGTTGTTTCCAGTG
ATAGGTGCGATTTGTGTTTGTCCAGACTGAGTCTGTCTTATGCCAACTTGCAAGCCCTGAGATGGCACAACTTGCATCT
CTTGCATCATCTGTGGTGTGATTTGAAGCCCCATATACTCAGAAAGAGAAGGATAAAGAACACCCCCAGGCTGATTTGT
TGGCGATGGGTAMTGTGGAGTACCAGGCTGATTTGTTGATGCTGGATACTGTGGATATTGAAGTTGTGCTGGTCCAGTA
ATTGCTCTTTCGTGGTTGATCTGAGCTGTTTGCAGCTGATCAACCCGCATATCTTCAAGAGTAGGATATAATCTAGACA
TGTTTGATCTGTTTCTTGATTTCAAATGAAATACACCTTGAGTTGTTTGAGAGTGATGAAATTAATATGAACTTCTGAG
TATGACGATACGGTACGTTAAGTCAGTCAGGAAACATTTAGTGAATCTAGATTACCC
>00143 5 reads, 1326 bases
TGCAGAGTTGGCTGTTTGTTTAAGTTTATGAATATGACTAGCCCATTACTATTTACTATAAGTCGTGTAGTTTCATGTT
TATGTATTAAACAGTAAACATATAATATTCTGCGTTGATTCATCTCGGCTATACTGACATCAGTTGGTTAAAGTTTCAA
ATAAAGTACTATAAATGTCGTGGTTTCCTGAAAGAAAACAAAGGTCATGGTTTCAGCGAGCTTGTGAAACCATACTTAC
AGCTGGTCCTATTCCCAGGCATGTGGCAATCATAATGGATGGAAATAGACGCTTTGCTGCAAAAAAAAGCATAGCAAAA
TCAGAGGGACATGTCAAAGGGTTTGACAAATTAGCTGAGACCCTAGAGTGGTGTTTGGATTTGGGAATAACAGAAGTTA
CTGTCTATGCATTTAGCATTGAGAACTTTAAGCGATCATCGGACGAAGTAACCTGCCTCATGGAGCTTTCTCGCCAAAA
GTTTGCCAAATTGCTACAAGAGAGAGATCTTATTCATAGACATGGGGTATGTGTACGTATTATTGGGGACATCACACTG
TTACCCAGAGACTTGCAGGAGTTACTGGCAGAGGCTGTTTCTATATCAGCAGAAAATACAAGAGCAATTCTGAATGTTT
GCTTTGCCTATACAGCAAGAGATGATATGTGTATGGCTATGAGAGAGCTCACTTTAGGTGTGAAAGATGGCCTCATAAA
GCAGAGTGATATATCCGAATCCTTATTGGAGAAATGTCTATACACCTCACAATCTAGAAATGTTGATTTGTTGATACGC
ACATCTGGGGAGCTGCGACTTAGTGATTTCTTATTATGGGAGAGTTCTTTTTCATGTTTAGCATTTGTGAAGGTACTTT
GGCCAGAGTTTAGTATTTGGCATATGTATGCTGCTATTCTTCACTACCAACGAAATAAAAGTAAAATACAGATTGCTCA
ACAAAATCACACCATTGAAAGGGAACGACTACAAAGGGAATCAGACTACCGCAGCATGATGGAAGGATCTACAGTGAGC
ACCACTACAAACACAGGCAGTGCTGTCAACTTTACTTCCACACAAGCTTCAGGTGAAGCTCAAGAACATCAAAGTCTAC
AAGTCCGTGTTCAGAATTACGCAAGAGAAAGGCGAAAAAAGGGTTGAAGCATTCTTAAATCAAGTGCACGAWAGAYGTG
TCAGCATATGTTAAAAGTCTACTGCCAACACGCCCAATTTTGATAACTAAACCTCAGCCTGTGTTAACTTGCTAGAAAT
ATTTTGCATTAATTAATTTATTACTGCTAAAAAATAGTTTAAGTTGGTGWGTGGSSAGCAGT
>00144 4 reads, 1363 bases
GAACTTCGATTGGAGACGGAACTGAGGAGTCCAGGTCACTTCAACCTGGTCAGTCATTGCCCAAAATGGGGATGTCTTG
GAAACTGGAAAAGACACCATCCCTTCAGAAACAGTCCAGAAATACAGCAAGGACCCAAGTATCACTGTCCTGAAATCTA
CAAGCAGGGATGGAGGTGCTCCAGTTTGGAAAGTAACAAGAGCTAATGGTGTAGAGATTGTTGAAGGAATAGGGGCTTT
ACCACAGGGAATTGCCCAATTTCTCAAGGGAAACATTATGTTACCGCAGATATCCACAGTTAATAAATGGCAAGTCAAA
CTACCAAACGGAGAGATCAGATCTGGGGAGGGTCCGATTCCTCACAGTATATTAGACCTTTTCACCAAACATTACGCAT
CACCTGTCAACCAGAAAGTCGTTACAAGCCGCCCRGTGATGGTCAGTAATTGGTCAGTTACTTTACCAGACGGTACGGT
ACGAAGTGGTACAGGGGAGATGCCAGCTGAACTAAAGAAACACGTCACGAGCCAGGGTCAACAATGGCAGGCCACTCTG
ACTGATGGAACTGTCCAGTTGGGGGAGGGAAGTGTACCTGGTGACCTCCTCAACTCACCGCGCGGACAAGGGTCTTCAA
TGTCAAGTACGAGATCAGATCAAGAAAAAAGATGGTCCCTGACAATGCCAGATGGGTCTGTAAAATCTGGCCAGGGAGA
TGTGCCGCCTGAACTGCAAAAACTTCTGCAAGAGTCAGGGACTCAGCAGCGATGGGAAATCACTTTACCAGATGGAACA
ATTGAAACAGGCTCTGGTCCTATTCCACAAAACCTTCGTAAATTCTTGGGTGGAGGACGTAGGCGTAGGGCGGCAGTGG
TTCCAGAGACATCATCTGATCTCCTTAGCAACTGCGGCACAGACCCATCTGTAATGCCATCACTGAACTTGGTGGCATC
CAGCAATGATGTCACCATGACAGTTGTCACGTCACAGTCTCCAAATGGAGTGTCTCTTAGTTTACCTGTGCATGATGGT
ATGAATGAAGTTCTGTTCCAGTATGATGGTACCCATCTAAGTGGCATTGTGAATGGTTATATCAGGAAACTTCCCTTAT
CTGGAACTGTGGTCAAGATGCCTGCACCTTTGACCTTAGGCCAGTGCTTGTTTAGGGACAGAAATCACTTCATTGGACA
AATAGATTTGTTTGAACTACACCATTGTTTGCCCTAAGAAATGTCTAGCACGCGTCATTGTCTACGYCACTTTCTCACA
AGAAGTCCTTTTAAAGAAACAGAGAAAGCCAACAAGAAAAAATGATCATCTACTTACAATGACTTGTGTCTGAAATAAT
TAAAACTTTCTACTTGAAAA
>00145 3 reads, 1024 bases
TTGGCGAGAAGGCTAGATTTTTTTTAACAAWWWWGCGAAATAAGGCTTAAAATTTAGCTCATCTCTTAAACTTAAAGTA
CCCTTTTATAAATCATAACTTTTATTGAACAATTTTAAAATGGCATGCTAAAATAGGATCTATAAAAATGTAATTCTGT
GCATAAAGATTATGGACAAACAGTCAAATGTAATTTCAATTGCCACTGGGCACAATTTAAAGCATTTCCTTTCTTTTTA
AAATTACTTTTAAAAAGACAACCACGAGAGGATATTTTTTACAATTAGCTCTTAAAATGTCATCAGCCAACACTTTAAA
TTATTTCAGTAACTCAGATGTATGTGCTGCGGTCACAGGCCTCCTCAAAATGTTAATTTAAGTACTGGTATCTACAATA
CAAATAAGTCCCTTGTTTTTTGGCAAAATGGCAATCTCAACAATAATGTTAAAATGCATGGTACAAAAATGGAAAAAAT
TTTAGTTTTAGGAAGTGACAAGTAATAAACAAATAGTCTTTTAAACGTACCAAACGCAATGTATATTTAAAATGAGGTG
AAATTAAATTAGATTTTTAATTCTTGTTGTTTGGAAGCTTTGATAAGCAGGCCATAATTAAGATTGTGTTTTATCTGCT
GTTACTGTTAACTTTKATCATCTTGCTGTATGACTATAAGTAGAAACTCTTTATCTGGTGCACACATGATTTCATTCTT
TTTGGAGCGAATGCGCATAAATTTCAGGTCATTAGTTGGGTCGATATCTCTGACTATGCTACGGGCTTTGGATGTCAAA
CTGTGGATGAGGCTTGCATACTGCACACGTGGTAGAGTTGTCGAGTGTTGTCTTAATGGGAATACCTTCACTGTTAACA
ACAATGATTCCAATAACTCCTTTATGTGACTGGATCCTTTTAAGAGTTTCTTCAACTTCAGCAGCAGCAGTGTTTTCAG
TGTTTGTTCATTCCTTGCAGTCTGTTATCACCGTTGCTAGGTTAGGAGACATTACCCTGTTATCCCTATTTTTTTT
>00146 3 reads, 1074 bases
AATTAAGAGACATCTATCAATTGAAYTTWAAACTTTGAAATTAGCATTGCAATTTTTACAAATCCTGTTGAGAATTGGG
TTAAACAAGGCTGTACAWAACAAATAACGATTTAATTCTTTATCTCAAAGTTCTTGACAAAATAAAGAGGTCTAGAAAG
ATATTTCTTAAAATATTTCTCCATTACTGGTATTCCATCTTCTTTGGATGCAATATAGAGGTTATCGAAGTCTGCAAGC
CCAAAACAATCGGTTCCAATTGCAGCAAACCCATGGTCAGGATTGTTAGGAATTGTGACATTGAAGATGCCTTTACCAT
CAATGGCTCCTAAGGCATTTGTTCCCTGAAGAAGTAACGAGAGTTTATGCCAACCAGATTTAAGTGTTACATTCCCTTG
CGTAATAACATTTGCACGTTTCAGATCATTTGCCAAAAGGTAAGTGCCATCTTGGAAGGCAAAAAAGAAAATTCCATAA
GACTGATCTGCTTCACATCCACCTTGGGTTAGACGAGCTGCAACAAATACACCACGTGTGGCATTGGCCTCTGGGAAGT
CATAGTCTACTTCAATAAACAGATCCTTCCAACTTCTCTCCCCAATATAATTGACAGACTTATTACTTGTGTCAGCATT
ACACCAATAGATTGGCATTGTAAGGACCATTTGGCGAACAACCTGATTCTGTCCAACTTTGATAATCTCAAAAGAACCA
GATTGTTGAGCAAGGTTGTAAGGTTCTTGGTACAATGAGTAATTTTCAAAATCATCTTTGTATGGCAGCGGGAAAGGTT
TTGGTGGAGGAGGATCAGGGTATGAACCTTTCTGACCTCTTTTTAAAGTGGTCAGCGTATATACTTCATCAAGCTGTAA
ACTCAGGTTGGCCTGGCCATTCACAAACTTAATGTTATCAAGCTTCTTAAAATAGACAGTTGTATTGGCTTCATTTCCA
AAACCTAATTTGGTGTACCAGACATTCATCTCTGTAATATGTGCAAAACTTCCATTGAGTGTCAAAGTGATTTCTTGAG
GTTCAACATTGAACCATGGAAGTGAAGGTCTAATGCATTCAGAATGA
>00147 7 reads, 1436 bases
TAACCGGGGCTCAGTACCTTAAACAGATCTCTCAGAGGAATGAAGTTGGCACAATCTGTCATTGCCAACAGTGACAGAA
ATTGTGATATCGGTCGGTCGACTGACACCTTGCCTCATATAAGAGATGTGCTTGCGACTCTTAGCAATGATGAAATTCG
AAAATATATGAGAGAGGTTCGGGTTATTGTTGCTAAGCTTAGAGAAAGTCTGCTAGAGACAAATGAAGAAATCAAAGCT
TTGACAAGAGGTAAAGAGGCTTTAGAGAGGACCTTGGAGCATACTCGAAAAGACTTGCAACTTAATAGAGATTCCAGGT
TTATTCGAGTCACTAGACCCCCAGTTGAAAAGGAGCGTGATGGAGCTGATGATCTGTTAGAAGCTGAGCACACCCACCT
GATGAACTGCAAAAGAACTTTAGAACTTCAGTTAAAATCAGTACAGCAACATTTGCAGTGCCTAGAGAGCATCAGAAAA
AGAACATTTGCAAGTTTGCAAGAGCGTTCAAGAGTATTGGATATACTCTGTCACTCTTTGGCAGCTGTGTTGCGTCCAG
AGCGGGACATTCTTATTCTCAAACCAAATCGTAGCCAGGTTGAAGGAAGAAATTCCATGGTTGACCCAAGCAAGATGGG
TTCGGATAAAATTGACGCTCTTGGTCCTTACACACCAGAAGTTGACCATCTATTGGGAGATGCAACTGATGCTCGTAAT
CAATCAGCATATCTACGCCGTGAATTAAGATGTACAATTGATCGTGTGGATAAACTCAAACAAGCTGCTCATAAGTCTG
TCAATGAAGGACTTACACAAAAAGTTGCTGAAACAATCACCCTCAAACAACATCTGAATCTTGGTGTGGGAGAAAATCG
ACATGCTTTGCACAGAGCTCAACGTTGGTATGATGCTACTGAAAAAGCCTTTGGATATACACAGGGTCCTGTTCAATAC
TCGGACCTTAAAACAAGTGAACATCTGGATCGCCCACTTGTTCGTCTCTATCAAAGACATCCTGGTACACAGCTGCCTG
AAGCACAAGAAAACATAAAGTCTGGGGTTGGTCTCATCCAATCTCTAACAGCAACCAGCAGAAACATTGGCATGCTAAG
AATTGCAGAAAAAAACCTGAAAGATGACAAGCGTAGCAAAAGTGCTGCTGCTGATATCGACAGCAGCGTCATTCGCATG
AGGCGCAGCAAATATGATCACCGTTGGTGTCTAGGAACAGCCTTCTAATTCTCAGCTTCAGCTTGCAAGACTTTAAAAA
TGATATTAGTTGCGAACAATAAGATGGTTGATGAGTTTTAGAAATTGCTGAATCATGAATCACATTGTCATGAACATTA
CATCGAGCTATCATTTTATCCACCACCATTTCTTGGGTTTTTTTATTACAAGGAATCAAACAGTGATATAATTAGATCA
CCACCTATCTATTT
>00148 7 reads, 1181 bases
AAGATCATCAAATTTTTAACCGYWWMKMGMTGGATAGTCTAGCAATATTAAGGCTGATGACTCACGAAAATGAAATAAT
AACTAAAAGGTTAAATGAATTAGATCACGGACATCTTATGGCTGACAATCAAACTTCCCTTCTGCAAAGTCGTGTTCTT
GAAAATGAGAATCGTACTTTGGTATCATTGTCTACATTAGAATCGACACTTCAAGAACAGGTATCGAAGCTTCAAAAAA
TTGAGTCGGACATGAAGATGTACATAACGGAAGTAAGAAGCGAACTAACCAACAAGTCGGAAGTAATCGACGCCAACAT
TAAGCTTCTGATTGACAGCGGATTTCTTATGATATGGCCTCGTGGCTCGTATGGGCTGCTCCAACCAAGTTCAGGTTGT
CCCAAGCAAGGTGGAAGCTTTTGGCTAGATAGTTGGCTCAGAATCCACACGGAATCAACAGACCGAAACAAAGATGAAA
TATCGAAGAATTCTCACCTAGTTGAATCCGCTATGTCGAGGGTCGAGAGACAGAACTTTCTAAGCCTACATTTCTGTGT
CAAGGCCGATGTGAACAACACATCCCCCATTTGGCCGAGTGGCTCATTTTGTATCAATAAAAAAGGAAACTGCCCTCCC
GGTTTCAGCCAAGGGTCTCTAAAATGGAACGAAGAGGATGAAAAATCAAACGTAACGAAATCTTTCGGTGGCACTGTGC
CAGACAATGAAGATAATTACAGTGGGTTGTACTTCTGTTGCAGAGGAGACAACGATCCAGGCGTACCAATATTTCTCCC
TAAATACGATCCGTTCTATTTGTACCGCTATGGAGGGAAGTGCCAGCAGGTTCATGGGATGAAAGTTACGGAAGAGTTT
GTCCACTTCGATACCGAGAACGACAATAACAATGACTCACGCTCTGGTGTCTATCCTGACGGCACCATTAATGACATAC
GACTGGAACTCTGCTACTATGAAAACTAAATTTATTATTTTTAAATTTAAATCTTGCATGATCCTTAAGTTTTTATTGT
GTGCCATTGTTTCTACTTACTACAAGTCTTGATAACTAAGACACTTAAAATGTACACGTAGATCTTTTTGGCAATGCTT
TAGGCCTATAAGTTGTTTTTATGTTTACACATTGATTTGGTCGTTCAAACGTGTTATCAGAAATGTTTTCTATAA
>00149 2 reads, 1218 bases
TGTGCTGAGAGAAGGCTAGACATTTTACAATGCAAGCTCTCAGATTGTTCCCGTTGAAGATCCTGTCTTTAGCACAGAC
GGCCAGGAGATAGGGATGATTTCAGCAGTGGACGTTGACTCTAAAGGCGACCTGTACGTCTTCCACAGAGCTGACAAGC
CGTGGACCGATGACACATTCTTGCCCAACAGTAATGTACTTTCGGCTGTTGGACAGGTGCCTATCTCTAAAGACCCAAT
TTKSRTWRTTGACCCAACAACTGGAAGAAAAAAGTCTAGCTTCGGAAAAAACATCTTCAACATTCCGCATGGACTAAAA
ATAGATGCTAACGACACAGTGTGGACGACAGATGTTGGAAGACACCAGGTTTTGAGATTCCCGAAAGGCGCCACCCAGC
CTGACCTAGTTCTTGGGGAGAAGTTTGTCCCTGGTGACGACGATCACCACTTCTGCAAACCTGCTGACGTCACTTTCGG
CAGAAATGGTGACTTTTTCGTGGCAGATGGCTACTGTAACAGTCGAATTTTGAAGTTTTCTCGAGATGGACAGCTGCTC
TTCAAATGGGGAGTCAAGTTGGCGAGTGCTACGAATGCATTGGACAATTTCACACTAGACACCCCTCACAGTTTAACAT
ACATAGAGAAAGAGGACCTCATATGTGTGGCAGATAGAGAACATAGCAGAGCTCTCTGCTACAACGCCGGATACACAAA
TGGACTGTCTCTGAGCAGCTACAATAGAACGTTGGTTGGTGTCAATGAGACGGGAAAGGTGTTTGCTATATACTACAAC
AAGGCAGCCAACGAAGTCGTCACAGCTGGAGAAATTTCCCGCGAGCCTTTCTCCGTAAATGGTCAATTAGTTTATCCAG
CACGGGCCTTCAGCTACAGCCTGAGTGGTCAGAAATTAATTTCCTGGGCTTTCATTACACAGGCTGTAGCAAAAGCTGG
ACCTTCCTTGATACATGACCTCTGTACATCGAAAGATGGGCTTGACTTTTTCCTCGGAGATATTGTGCAACAGAAAGTA
TTTAAATACACSCAGCGTCCAATCAGTRTTGTGGGCTGAAGACGTTAAATTTGTTAGAAGATGTTATAACTCAATGGCA
AAGACGTTATATTTATAGTGGATTATTTGTTTGATTGTTTTGAGTGCTATATGTACATTTTCTGACAAAATTCATCTAT
TTTGAAATATTAATTAAAATCCTCCCACTGCCA
>00150 2 reads, 1082 bases
TACTTTATGGGTTCCTTGAACCTGTGGAGGATCAGGTTTTAAAGGAGTACTCGGATTTGAGCCGGAGTGAAGCCATCGA
GCTGGAGGCTGAGGCACAGCTTGAAGGGGACAAAACTGTGCTCCCGGGTGTAGAGGAGTCGGCCAAGACTGCCGTGAGT
GCCGGAAACTTGTATGTGTACTACTACCAGGAATGGTTCAATGAGSGYAAATGCTGCCCAAGAAGCCAGAACTACCAGT
GCAGCTGGAAAACCAGGAGACTGTCGTGTTTCAAGGTATACCGAAAAGAACGCTGGGGCGTGTGTTGTCCACTGTGGCC
AAAAGTCTACTATGCCCAATGCGACTGTAGCCAATGTAGCCGTTTGTGCCCGGACTGTGTTCAAACCGGAAGGTGTGTT
ACCAATTACTCGTACCAATGGTTCCTTGCCGTCTGCTACAACCTGGGCTTCTGGAACAGATTCCTGGTCCTTAACCAGT
ACCTMCCCACCAGCTGCTCTTGCAACGCGCCCAAATGTTATTGATTTCTGAAATAATGTGGCACGCTAAAAACTGGCAT
ATGTTATTTGATGACTTATTCTAATTCTTGTAATCATTTATATACATATATACATATATAATATACAAATAGTATAAAC
ATTTATGAACTAAGTAGAACTATTCCCAAAGAAAATTGAAGGCTAATTGTATGTGAATTGTAATAAGGTGTGTGGGGCA
GGCAAAAAAGAATATCAGATCGTTGCTGAGCTCCGTTTCAAAAATGGTGGATAAAGGTGAAAGCAGAGAGAAAAAGAAG
AAAAAAAACAGAAGAAGAGCGAAGCAAAGACCTTGCAACAAAACGAACATTTATGAGAGGCCGATTCTAAAAATGGAGT
CATAGTATTACCTCGAGACTATGTAGATTTATGACTGCCATTCAGGATAGAGCTTGTACTTGTACACTAATGACGTAGT
TGCAACATCTACTCAATCGTCGCACTAAGTCATTTATAACATAAGAAGATAAATGCAGCCTACATTTAGGAAGAATAAT
AGTTTTTTAATCTTTTCAACTATTCACCATTGTAGACTATTGGCAGAGCGGTTCA
>00151 3 reads, 1300 bases
GAGCCGACGTAATTATTTTAWSSTAKCRTWATCTTGATAAAGAGATTAAGGAGGGTCGTCACTGGACAGAAGTGAGTGC
AGGATATGAGCTGGATAAAAGAAGACGGGCACTTCCATTTAACCGTGGACTCAGCTTTGAAACTATTTCTTGTTATGGA
TCCAATGGCGCCATTATTCACTACAGCCCTCTAAAKGSTACAKACAAGAAAATATCAACAGACAACTTATATCTCTTAG
ACTCAGGTGGCCAATATCTAGATGGAACAACTGATGTTACCAGGACAATGCATTATGGAACACCAACCAGTTATCATAA
GGAATGTTACACTCGTGTTTTGATGTCATCTATTAACCTGGCTAATGCAAAATGGCCACAAGGATTGTATGGTCGACAA
ATTGATGCTCTAGCACGATACCAACTGTGGGATGTTGGATTTGTTTTCCGACACGGGACAGGTCATGGAATAGGGGCCT
ATCTCAGTGTTCATGAAGGTCCTGGCCGAATCTACATCTCATCCACATCTTCATCAGAAAAACCCTTAAAAACATACGA
GTTTTACTCTGATGAGCCTGGTTACTATGAAGATGGAAAATTTGGGATCAGGCTGGAAACAATTGTCACTGTGGCACCC
TTTACACCAAAATATAAGACTGCAGGTGAGAATTTTCTTCAATTCACACCAGTCACTTTGGTACCATTTGAACCTGACC
TCATTGACTATAGCTTGTTGAATGATGATCAGGTGAACTGGTTGAATTACTACAATAATATAACAAGGGTGACCATGTT
GCCTTTATTACAAGACGACCAGTTAGCTACTAAGTGGCTTAGTGATCGAACCCAAGAAATCAAAATATCGGAGCCAAAT
ACTAATTCTAACCCCAACGGTGGTCAGATAAATACTCCATATTACCTGGTATATATCTTTATGGTATTGTTAATATTTA
ACCACTAATGCAGCAAGTTATTTATGAACAGAAGATATCCAAAAACATTTTTTTTTAATGTTGTTAATAAAGTAAAATT
CATGAAGCCACTGTTACATTAAGCCTATTGAAGATTTTCATTTTAACACAGTAAATAGGAATGGGTTAAGGGGYTGTCA
TATGATTTAAAATGATGTCAAGGTCCTTTCTACCAAACAATTTCTACAATGAATTAGAAAATATGAATCGTGTAGAAAA
GAAGATCTCAACAATAAAGAAACCAAGAATGGCTGTCACATCCCCTTTGCTATGTAATTATGGGGTTCTTTTAAATGCA
CTGGATATATTGTATGGATCTTCACCCTAAATTTTC
>00152 2 reads, 1093 bases
CCCTGTTTACTATTGTCTTCCATCAGATACAGGTCTAATAGTACAATGGCCAGTAGCTTCAGAAGTCAGCTGTCATCCC
AGAATGCCTCCTACCTAACCAACAGCATGTTGAGCATACCTCAGATCCAGGCCTCCCTGGAGAACTTTGAGAAGGAGAT
GGACAGACGATCTTCTTTGTTTTGGAAGTTCTGGACCATCCTGTGTGAGATGTTTGATGTCAAGCTATTGTTTAACCCA
ATCTTTGCCCTGTTGGTGGCCTCATCCTTCCTCACTCTCCTTGCCTTTTACATCCCCTTCTTCTACTTGCCTGCCAAGG
GTGCGGATATTGGCATGACCCAAGAGCGGGCAACTTTCCTTATTTCTATAATCGGCATCACCAACACAATTGGCAGGAT
AGTCTGTGGGTGGCTAGCAGACAGGCCTTGCATCAACTCTCTGCACATGAACAACTGTGCTCTCATCATTGCTGGCATT
GCAGAGCTCTTGTGTCCACTGGGCACTGGGGAACTTTTCCTTGCAGTAATCTCTGCTTGTCTTGGCCTTTGTTTAGCCG
TATTTGTGTCTCTGAGAACCATTTTGCTGGTTGATCTTCTTGGTCTGGAGATGCTCACCAAGTCTTTCGGTCTGCTCAT
CTTGTTTCAAGGGGTGGCAGCTTTTATTGGTGCTCCCATAGCCGGTCAGCTATTGGACACTACAGGAAGTATTGACAAC
TGTTTCTACCTAGCAGGATCATTGACTATCCTGTCTGGCCTGCTCATGCTCCCAATTGTGTTTCTGGAAACTCACAAGG
ATAAGAAGGAAATGCCCAAAATGGCAGAACAAATACCAATTAATGAGACACTTAAGTTGGAGAAATGGGAGGCTAAAGT
GTGAGGGACTAATGTTCTTGTACTGTAACAATATTCTTGTTGATATCAATACTGATGTAAAAACATATAGCAGAATGTA
AGGAAATCTGGTTATCAGTTCACCCACTTACAACTTAATATCCAAGATGATGCACAGAATTGACTTGATGTTAGAACTA
TGGTCATCTTKTTTTTTAGGACAAGCCGCTTGTTTTGATTTTGTACCCCTACAGGCTTGTTGCGTT
>00153 4 reads, 1388 bases
TGGCAGTCCCAGTTCATTGAGGTCTGCCTCACTCCATCGGTTTCCTATATGTTCACAGACAACTTCCCAGGCAAGTTCT
AGCAAGTTCCCCACTTCCACCCTCAATGAAAGAATCCTTTTGGTGCGCACCCATTCGTGCCTGTAGTTGGTCACACCAC
CAAAAATGTAGATGCAACCCTTTAACGGTGAAAAATCTGCAGAATGAAAGTATAAAGGCACGGCCAATGTGGCGGAGTA
TTTTGTCCAAGTTGCCTTGACCAGTGAGAACTTCCAGATCTCATTGAACAGCGTTGTTTCATTTGTAGTGGAGGTGCCA
CTGACTCCACCAACCATGTAAACATCATCTTTGTAATGACAGCAACTATGGCACTTGCGAGGTTTAGGGTGTCCATGTA
GTGGATCTGGAAATGTCTTGAGTGTRCCCCACTGACAAGATTTTATATTGAAAGTATGAATATTGACYAGTGAAAAGGC
RTCYCGGTCTGTGCCGCCGKCCAAATACATACAACATTTCCCCATCAAATGCAGTTTCATGTCGATATCTTCCCACTGG
CTGTCGAGGGTCTGAATCAGAACTCAGTTTTGTCCACCGTCCCATGGGTCCCCTCAAATCCAGGTGAAAAACTTCTGAG
TTGTAGATGTACCCTGATGTCCCACCAACTATGTACACGTCTGGGAAACTCATTGTCATCGTATGGCCATATCTTTCCT
CTGGTAAATCTCCAGTAACTGGAATGAGGTGCCACCGGTAACTGTTGCGAATTATTGCTACTTCATCTCCCCGCACAGC
ATGAGCATCACAGTCACAATGGCTACTGTTCTCGGCATGACATGGTGCGGTGAGATCATATCTATACAGAGCACTACTC
GGGGTCTCGCCAAAAGGTATGGAGGTTCCACCAAATAAAAATAGCCATCTACCAACTTTTGCAATTGTGTGGGAGGCTA
TTGTAGGAGGAACACTGTAGAAGTCATCCAAGAGCTGCCACTTTCTTGTGCTTAAGTTAAACCTCCATAACTCTTTAAA
AAGTGGATGTCCCCTGACATTAACTGGGGCAGTGTAACCCCCAAGGACCGGATTAAAGCCACCAAGCGCATACAAACTA
TCTTCAGTTACAATGATGCGATGACCACTTCGTCCAGTAGGACAGCACGTGCATTTAGGTTCAAAGTCAAAATCATCCT
TGTTAAAATCATTTAGATGAGTGACTGGATGAATAGTTTTTATCATGATAGCTACTATAGGTAGCTTGGCAGGTCAGAT
CGTAARCATTCTGGTAAGACYCTTTTAAACAGGAAGCCTTTTTCATGAATAAAAAACTTTTTCCACTGGAATAAGTCTT
ACCGTTCTGTGTGAGATAGTGAGATATGAGCAAAAAGTAAATAAA
>00154 11 reads, 1090 bases
AAAAAAAAAAAAAAAAAAAACCTGTCGAWWGAAGATTTTTCAGGTGGTGCAGGCTTTTCTGGTTTTTTTGCTACGGGAG
GTTTTTCTTTCCCAGGCTTCGGTGCCACAGCTGGTTTAGGGGCCACTTCAGGCTTTCCCTGAGGCTTAGCAATCTCCAC
CTTAAACTCCTGCCTTCTATCTCCTGACTCCAAGCTACCTTCAGAGCTCCTACTTCTGCTGGAGGACCTGGAGGAACCC
TCGCTCTCATAACTTCTCCTCCGATTCGTGATGGCTGCCAGAGGTGTGGCTACACCCCCMAGATGGGCATGATTAGATA
CTGGCTATTCTGTCCCCCCTGGGGGAATCTCTGTTAAGCGCTCTCCTCTCTTCCCGGGGTGAGTCCCTGGGTACGGTGG
GTAATCTGTCGTCAAGGTCATCATCCTCAACAGCTTTGACTGGCTGTCTGATGATTTGTCGGGTGATAAGCTTAGGAGA
TTCAATCTGTGGTAGGGGGGACTGAAGAGGGGTCCTGTCTTCTTGGGTAAAGGAGCTGTCTTCTTCCTGCATGGAATCC
TCATTAACTCTAGAGAGCACCACACGACTTCTTTCCTCAGTACGAACCCTGTCCCGGTCATCACGTACAGAGTCAAAAC
TCAGATCATGGATATCTATCCTGGGGTGCTCAAAAAATGCTTCTCTTCTGTTATTCAAATTGTCTTGGCTCCTAGATCT
GTTGTTGTTTAGGACAGAGTTTAGTGACTGTCTGCTGTGTGTCCTCTCAAACTGTTTGGAGGGTCTGTCTGCCATTGAT
GCATTCAGGCGAGTCTGATACAATGTACGACCCGAGTAGCGATATTTAGAACCAAATCTTGGGAAACCAGATCTCTTCC
TTGCATCGTCAGAAGACCGTAGGCGTAGGAATGAGTGATGTTCAACTGCGATTTTCCAAATACGTTTTGCCATTTTGTT
GTTAGGAAGTCTGAATGCAATCCAGCTTTCATAAGTCTCAAACTCAGCCGGTCTTATCCTCAGTAAAAATTTGTTTCTT
CGATATGAGATTTTAAGAATCTTAGGCCAGACAAATCGGTTTATCCTCAAGTTGTCTCTATAC
>00155 2 reads, 1241 bases
TGCTGCGAGAAGGCTAGACCGCAGGTGTGTTCTTATAGCAGGGATCATTTCCTGCTTCGTGTTATTGGCGAAAGGTGAT
TTTGTTCTGCAAAGCAACAAACAATGTGGATCTTATATGAAACCTGTTGAGGAAAGGGTCTTAGATGTTGATGAATTGG
ACATTATTTCTCACAGTGGACGTCAGTACTATGCACCAGATATGGATTGTATCCTCACTATAGTTGGAAAGATTTACAA
CCAATGGGAGATCACTGTTACACAGTTAAATATCGATAAATATAAGGATAGCTGCAGAGAGCAAAGTCCTCCTTGTTGC
AATGACTATTTGAAAATTTTCAACAGCTATCGGGTAGACAATGCTCGCTTATTTCCATCCATCCCTTGGCGAGGCCTTT
GTGGAACAGATCTTCCTCGGCAGTCCACATATACTTCTACACAGAATTATATTACGATCCAGTTCAATGCTAACCCAGT
AGAAGACCAAATGACAGGTTTTGTACTGCATTTACGACAGTATCCGAGAAGAAGTTCAGGCAGTGAAATTTCTCAGACA
GGTTACATTGGAGGCTGGAATGATGGAAGCTTGACAGAACTTCAGATAGATTGGTCAAACCAGGAGCAAGTACCTGGTG
ACTATAAACCTGGCCAAGACCCAACTTTTGAATATGATCCAAATGGAATCCCTTGCTRCGAGTGCATCGGTTGCAAGAG
GGACTACTTTAAAACTAGTGATATAGGGGTAGTGGTCAGAAGTGGATGCTATGTGTGCACAAAGGAATGGTTGCAAGGG
AATGCACAAGCTTCAAGACAGTGTTTATCCAAAAGTGGCTACCAAGATAAACTCAAGACATTAATGGACCCTTCTGGCG
GAGACTCTGTTGCCGACTACAGAGGGTGCAAAACATTTCTCAGGAATGTCCAGGGCACAACATATATCAGTGTCTGTAT
CTGTGACACAGGAAAATGTAACAAAGGGAATGGTCTCCACTCAAACTGGTTAGGCCCTGCTCTCTTATCTGCTCTTGTA
GCCTTATTTTATAGAAAGAATATAGTATGATAACAGAAAGTGTGAATTCATCATCGATTACATAAATTTTTAAGCAATT
AATTTAATATCTTTTGTATTGTATTGTAAATTTCACAACATTCCAAAATAATACTTATAACATTGAAATGGTAAAATAT
ATTTTAAAACAATTAAGTATCCTTTTCTTCTGTGGCTCAGCTAGGGTTAAGTTCAC
>00156 2 reads, 1172 bases
AGAAGGCTAGAGCGSTCWSWGACTGATTTGTGTTACTGTAAAATAAACACTATGTTGAGAATAATGATCTACAATAACA
AGACTTAACAAAAGGAGCTAGATGTTTTTAAGACTGATCAAATGTTTATACATAAACATGCATAACAAAAACTAAACGA
ACAAACAAAACTTTTATGAATAAAATAATATCTATTTATCAGCAAAAGCTTTAAGACTCTGTAGGAAGCCAATGTACTG
TTTGTTCTCATATGCTGTGCAGAAATCAACCAGTTGTACAATAAATTCATCATTAATTCCTCTCTCATCCAACATGTCC
ATCAAAAGATCAAAGAGTTCAGCATCCATTGTTGCGGCAGATACTGAGAAAGTTGTATCTTTCCATTCCCCCCCATGGA
TGGCAACATCTTGAATCTCAAATTGATCATCTATTTGTTCTGTTTGTTGTCCTTTAGCATACTGACTGCCATCCTCAAA
ATCTTGATCTTGGGGAGGGAAGTTACATTGTAGAGCAAACACTGTACCATCTCCTTTAGTTATTTCTACCTCAAAAGGT
GGTCTGCAGATCATTTGTGGTGGTTCATCTTCCTTTTCTGTTGGGCTGTCTGACATGATTGAATCAACTGATCCATTAA
CACTTAWTYTCACMACAATCTTTTCTTTCGCCAGAAACCTTTGTTAAAGTCACATCTCCACCATCAGTTTGGATTTCAA
AACCAGGAATGGCTGGCAAACTGCTGGTAGCCCTTGACTTTTCATAGCTTATTTCTTTGTCAAGAAATTTGGAAATCTC
TTTATCAACTTCAGTGCTGTAGGTGGCTAACGTTGTTTTTGAACAAGTCATACACTGACAACTTTTTGGGTGTAAAAAT
GACCTCGATAAAGATGAGAGGGTGCAATGCGCCCTTGACGCAGTTGGCGAGAAGACAGAATCGTTGAATTTTGATACAT
ATTGTCTCAGAGCGCGTCCAGAATGTTTCTGCGCATATAATACAACTGAATTTCCATTCGATAGAATTTTGGAGGTAGC
ATTGACAGCAAATTTCAAAGCCTTAGCCATCTTTTAATTATTTTAATTTAGAGATTCTCAGTGATACAGACGACAATGT
GCTCAATAARATATATCCGCATGTGGTTTGACCTTCAAAGGGAAACACTGTTATCCCTATTTTTTT
>00157 14 reads, 1331 bases
TCAAAATGTGACTTGTGGTGTTTGTGTATGATTAGTACATTCGCACAATAGCACATACACTCACACACGCATTCACTCA
TTAACACAAACTTCTTATAGTATGTATTTGTGAGTTGGTTTTTGAGTTCCGCTTTAATTTACAGTATCTACTTGGATGC
TGTTAAAGGTTTTTTATATTGTTACATTGAAGACTATAAATCGTAGCCCCCAGACCATCTCATTACAAACATGATGCTT
CCTTTTGTCGCAGTTCTGCTTAGTTTACACCAGGTCGTCGCGATCGACGTCACACAACAGCTGGCATTGTCGGCCGCGG
AGTCCAGCTTCTCGCAGAAACTGTACAAAAATGTTGCCCTTCAGGAGAGTAACTTTGTTTACTCACCTTACAGCATTCA
CTCAGTCCTGACCATGACCTCTCTTGGTGCCAAGGGGGCGACACTGAACGAGATGACGAACGTCCTTGAAATCGGCTCG
CTTGCTGCCTACCCGCACGAGACCTATCACGACTTAATTGTTCAGTGGAACTCTGTCAAGGACGTTGTGCTCAACACAT
GCAACGCCATATTCTCCCATCCGCTCGAGATGATTCTGCCAAGTTTTACCAAGAGCGTTACAGACTACTACCTGGCAAC
TGCCAAGAACCTTGACCTTGTTGAACCAGAGAAGGCCATCAACAGCCTAGTGGCCAACAAGACCAATAACGTCATAAGT
GAAGTCCTGAAACCAGGAAGTCTCGACGCTAGTACCGTACTTGTACTGGTAAATGTGATCTTTTTCAATGGAACGTGGG
AACACCCTTTCCTTGCTGCAAACACTCAGCAACGAGATTTCCACCAGCTTGGAGGGGTCACCTCAAAGGTTGACATGCT
GAGAGCCTATGGCTACATCGCCAGGCACAAGAAAGATAACTCTCTCGGCGTCGACGTGGTGGAGCTGAAGTTCAAGGGC
GATCAGTTTTCCTTCTATATCGCGCTCCCCCAGGAGGTGGACGGAATCAAAGACTTGGAGAACCAACTCCAAGTCCCCG
GTCAGTTTGACCAGCTGTTCGAAGGCCTCCAGTTTGGCAGCATCAACCTCAGCGTCCCCAAGTTTAAGATAGAGACGTC
ACTCGACCTCAAGCCGGTTCTTGCCGCCATGGGAATGCCGTCGGCGTTTGATGCGAGGGCGGACTTCAGCGGCATCAAC
GGAGTTGGTTCCCTCCAGATCGACAAGGTCATTCACAAGGCCGTCATAGATGTCCAGGAGACTGGGACGGTTGCCGCGG
CCGCCACTGTGGTCGCCATAACCAAGGACCTGGTAATAAGCGACATCGGAAGAGCGGTTCAGCAGGA
>00158 3 reads, 1244 bases
TTTTTCGGAATATACCTTACSAGTSWSACKWATTCATCCTTTGTTCAATCTGGCCTCTGGGAATTGTTACTTAAATTAC
AGGTACCCTGAAAACAGGTCATTTTACCTTTGCTTATTTAAACACATCTTAAATCTTGGACGACGTGGGTGCAACAGAA
CAGCTTTTGAATTTTGTAAACTTTTACTGAGTCTTGATCCCACCAACGACCCTCTGGACTGTATGAGCATGATTGATTA
CTTTGCCTTAAGAGCCCAACAGTATGATCACCTGGTACGCTTGGACACAGAGGTCTTGACCTCAAAGGCAATGAAGCAC
GTGCCCAATTTTGCCATGTCGATTCCTCTGGCCTACTTCAAGCTGGCTGTCCAAAATGGAAGGGAGAGAACCACAGCAG
ATTCTATACTCCAGGACAGTTTATTGTTTTTCCCCATGATGTTGATGCCATTACTAGATGAGTGCTCCGTGCAGCCAGA
CAAACTCGTCAAGACTGCTCCGTTCAACAACACTGCCGAACTTCATGATAACACGAGTGAACTGCAAAGGATGATCATG
TTGTACGTGAAGCGCTGCCAGCCATGTTGGAAGGAGGCAGAAGTCATTGCCTGGTTGGAAGAAAATGTTAAAGCTGTGA
TCGAAATTGTACGACAGGGCACAGATAAAAGACTGGAGGAGTATGAAGTACTGAGGAAAAAACGATTTAGGAAGCCTCC
ACTTTCTCTAGTCAGACATTATTTTCTGTCAGAAATACAAGGTCTTGGTTTGCCCCGGCATTTCCTGTCAAGCTCAGTG
TTAAGTCATGATCCATTTCCTCCACCTGATTCAATTATTTCTTACACGAGACCAGCATCCAATGTCAGACCAACAGTGG
CCTCACAAGATCAGAGTGGAGTTCTGAGATCATTTCTTCAGTCACTTCTACCTACTTACAACCCATATGAACCAGTCAA
CGTTGTGGCCAGACAGCAACACAGAGATGAAGAGGATGATGCAGAGGGGGCAAGGGGAGGCAACGCAATACCACAGCAG
ATTCAACAGAGTGTCCAGGCCATCATGCAGGCCATGAGGCAGCTACTGAATGAACAATTTAATGTGGGCAACAACCCTG
AGCAGGGGAACGGGAGGGAAGATCAGCCGGAGTTGGACGAGAATGACAGGGAATGGGAGGAAGAGGATGGACTTGGATA
AATATCCGGAACCTCATTGTTTTTGAGTCTGTGATGGAAATAAAATACTGATAAGATAA
>00159 4 reads, 1168 bases
GTACTGGACGACRGGTGTMACTACATGTACAGTTGTGAGTCGTCAGCTGTGTCTGCGACCTGACATGGACAACCACTGG
GCACTAAGAGACTTTGCAGCAAGACTGGTGGCACAGATATGTCGGAATTACAGTAATAATACCAATAACATACAAGCCA
GGGTGACAAAAAAGTTTAGCAAAGCCATCCAGAGTGAGAATGTAGCCCTAGCTACTCAATATGGTGCACTCGCTGGTCT
GGGAGAGTTGGGACCAGAGGTGATCAAGTCATGTTTGCTGCCATACATTTGCATACTTGGTGATCGTATCAAATCAGTC
AATGAAGGGACAGCACTTAACAGTGTGGACAAAATAGCAGCTGAACATATCAAAAGGCAGCTTCTGAAATATCTTCCTG
CCGTCCTTAAAACATTCCACAACAGTACTGAAAATGTGGATGAGTTTAATGTTGCCTATGGCTACCTGGGACCTATGAT
GTTTTCAATGTTTTCTCAAAAAGAGAAGAGTTTGGCAGCTACCACCTCTGCAGTTCACCAACTAGCTGTACCCAGATCT
ACACTGCAGTTGACACAGAGACCACCACAGATAGTGATTCAGCAGCAGCCCAGCACACCATTAATCTCATCACCTTTCC
TTAATCCATCACCGGGAATCTCCTCCATTAACACCCGACCATTGTCTTCGCTGCCCTCAACACCAACAGGCGTACCAGG
ACAAAAATTTGTTATAGTTTCTCAAGCAAGACCTTCAACACCTATTGGCACACCTACCCAGGCCGCACCCTTGGTCAAA
CTGGTTACAACTCAACAGTCTTCCATTACAACCAGCGTTTCTGCAGGCCCTCAAAAAATTGTTGTGATTCAAGGTGGAC
CAAAGCCTGAAGACAGTGTTGGTGGGGGCATGCGCACCACACTTCTGAGTGCGACCYCCAGGCACGACATTTGTTCAAC
AGCCTTCTACAACTTCCAGTAATATAAGTGGCAATGATACTTTGTAGTGAATTGTATACAAAACAGCATTCTAGATATA
TGCCATTTTAATTTTAAAAAATACACCTTCCAGTTAGTAATTCCCCAATCACAGCTGTTTCTATATAAAAACAGTAGAG
AATTCATCCATGGAAGTAGGTCAAAGGTTAGCAAAAATTAATATATCCTTTTGAAATGCARA
>00160 2 reads, 1636 bases
TAACACTTTTGTCACTGTTATTACTGTTATGAAAGAACAGCGCTTTCTCGAAATCGTCCATTAATATTTGACATTAACA
WTAWTATAYRATTAMTKAATTGCTGTTACTTTGAAATAAAGTTAAAGTAGCTTCTCATCTATCACTTTTATAAAATATA
AAACAGCATTAGATTAATGTGATGGTTATTTTTAAAAATATGTAACTGTTGCTAATRGCAAACGTTAACAAGAAAAACA
TTGTTAGWGAAGACTGTAGACACGATCCTTTGTTAGTTTTCTTGCCAGTGGGAGCAGTCTTACCGGTGGTGGCAGGTGC
AGGTTTGGAGGTAGTGACAACACTTGTATCGTTGGAACTGATTTGTTTAGCCTTACTCAGMAAGGGATAGCGCCCCTGG
TTGCAGCTTTTTCCACTAAAGTCATCTTGATCCAGAGACCAAAACATGAGTCCAGCCACGCCTACACTCATCATCCATC
TTGTCTTGGCCTCCACGCTCCGAGGGTCTTCATAACCAATCCAGCTGTCMGCATTCACYAAGTACGGGACTTGTTGGTT
CTCATCGAAGTACTCAGTGCTTAAACTGTTTTTGAGCATGTTACAAATCTCGGGGTACGCCAGGCCACCGAGGATTTCA
TAGTCGGGTCCTTTCCTTGGTGCCTTCGTCGTGTTCGTGTTCGAACCCACGTCGTACACGGACGAGTTCTGGAGCACCA
GCCACTTCCCGACTCCTGTGATACCCACAAGTATCTTGCTAAAGTCCAGGCCCAGTCGGTTATAGTAGTGGACTGTCCA
GTTCGTACTAAGCTCCGGGTTGAATTGTATGCTATTTCTCGAATAGAGTGGACTGTTGAAGGCCGTGACCAGATTGTCT
GACGAGGCGTAGTCGTAGGTCATGACGTTGACGTAATCCACGTACCTGTTTATCTCTGCCACTTTGTAGCCCGGGTCTA
TGTAATATCTGCCAGGAGGGGCAGCGATGGTCAGCAACAAACGGGATGTAGTCGTCTCACCGTCGAAAGCTTCACGCAG
TGCCTTCAATAATGAGATCAATATTTGGCTATTACTAGCATTCGGGTATTCCCAGTCAAGATCGATGCCGTCAAAGCCA
TAATTTCTCAAGAATSTAACGGTGGAKGCAGAAAAGTTGTTAAGTGTGGCCGCCGTCTGAGCAACAGCTGTGAAACCAT
CGCCATGGTCATTCTGTCCACCAACAGAAAGCAGAGTCTTCAGCTGGATGTTGGTCTTTTTTAAGTCATTGAATGCTCT
GTATCTGGGTATTTCCTCCACTGGTTGCGTCTGCAATACTTTGTTGTTCTTATCTATGTTTCCGAAGGCGTAAATAAGG
TGGGTGCATATGAATGGATCGATGTCTTTAATATCAAATCTCGCTAGCGGGGACACTCTCTGATGGGCCCAGTTTGGGA
AGTAGCACACGCGTAGTAGATCTTTGGCCAGCGATTGCTCTATGGTGGTCAACAGGACAACAAGACAAGCGAAGATTGA
AGTTTTATCCATATTTTGGCGTTTGAGATCCACTTAAGGCAATCTGTTTACCGGAAAAACAACTTTATTTTGTGTGGTT
CACCATACATCGATTACATATATTGGGGTTATTCTACCTGTCGAGCTAAAACAAAA
>00161 22 reads, 1028 bases
CGTCTGATGTTACTAAACTACTGGTATCTAAAAAATAAGATAGTCMKKACCACTKGTGAAACAACTGAAGGGTGGCTAC
AAAATAACCTACCACCCTGATGGACCTGAAGGAGAAAGTTTTGAAATTGATTTTACACCACCTTTCAAGCGAGTTTCTA
TGATACCTGCCCTAGAGGAGGCCATGAATGTTAAATTCCCCCCAGCAACAGAACTGCACAAAGAAGCCTCACGTAAGTT
TCTTGATGATCTTGCTGTTAAACATGGTGTAGAATGCCCTCCACCAAGAACAACTGCTAGATTATTAGACAAGATGGTC
GGTGATTTTATCGAGGACAAGATTATCAACCCAACTTTTATTATCGAACACCCTGAAATAATGAGTCCACTGTCTAAAA
CGCACAGATCAATTCCAGGTTTGACAGAGCGTTTCGAATGTTTCGTGATGCACAAAGAGATTGTGAATGCATTCACTGA
GTTGAATGACCCAGTCATTCAGAGAGAGAGATTTCAGCAACAAGCAAAGGACAAAGCAGCCGGAGATGTTGAGGCCATG
TTTGTAGATGAAAACTTCTGTGTAGCCCTGGAGTATGGTCTACCACCTACTGGAGGATTAGGTCTGGGTATTGACAGAC
TTACCATGTTTTTGACAGACCAAAATAACATCAAGGAAGTGTTGTTTTTCCCTGCAATGCGACCGGAGGAGAACACCCA
AAAGCCAGAAGCAGCAGCACAGAAACCATCATAGCATAACGGATTCATCTCTAACAAGCTTTCTAAAAACCACTGTATT
TGGAAAAGGGGGCTTCATGGCCTTTAGCATGGAAATACTTTTCACTGTCTACCCATTTTTTAAAGCTATATTAGTAACA
AATTGTTTTCTAGAAGTGTTTTATTTTTCTTAAAATTTTCCCCTTTTGTTTAAAATATWAGTTAATAAGTTTTTCATAT
CATCAGTTTTTCAAATGGGGAAACTACCATACTTTCTTCCGTGTATGTCAATAAGTTAAAAATTTGAATCATTTAACTT
T
>00162 4 reads, 1130 bases
ATTATAACGTAAGCAGGAAGCGGCCAAGCGSATCATGYACGTCGCAGTAAAGCAGGCATGTTCTGGGTTTGCTAGGGTA
GCAAAAGTTGCCCTTTCATCCCCTATTTGTCAACAAAATGGAGCGAACTTCATTCCTGCATTGTATTCAGTCAAAAGGA
ATTATGCTAAAGAAGCTGCACAGCCCAAATCAGGCTTTGCTACTGGACGTGTAGTTGCAGCTTATTGGTGCTGTTGTTG
ATGTCCAGTTTGATGATAAGCTCCCTGCTATCCTCAATGCATTGGAAGTGCAGAATAGATCTCCAAGACTTATTCTTGA
GGTTGCTTCCCATTTGGGTGAGAGTGTTGTACGGACCATTGCCATGGATGGTACAGAAGGTCTTGTTCGAGGTGAAGTA
TGTGTTGACGTTGGTTCACCAATCACAATTCCAGTTGGCCCTAAAACACTAGGAAGAATCATTAATGTTATTGGAGAGC
CAATTGACGAGAGAGGACCCATCAACTCTGAGCACTATTTGTCAATTCACCAAGAAGCCCCAGCATTTTCTGAAATGAG
TGTTGAACAAGAGATTTTGGAGACTGGCATCAAAGTTGTTGACCTACTAGCCCCCTATGCAAGGGGTGGAAAAATTGGC
CTTTTTGGTGGTGCTGGGGTTGGAAAGACTGTCTTGATTATGGAACTGATTAACAATGTTGCTAAAGCCCATGGTGGTT
ACTCTGTATTTGCTGGTGTGGGTGCAGAGAACTCGTGAAGGAAATGATCTTTACCATGAAATGATTACCACCAAGGTCA
TCTCTCTTACAGACAACACATCAAAGGTGTCTTTGGTGTATGGTCAAATGAATGAGCCACCTGGTGCTCGTGCACGTGT
TGCCTTAAGTGGATTGACAGTAGCTGAATTTTTCAGAGATCACGAAGGACAGGATGTGCTTCTTTTCATTGACAATATC
TTTAGATTTACTCAAGCTGGTTCAGAGGTGTCTGCCTTGCTGGGTCGTATTCCTTCTGCTGTGGGTTACCAACCCACTT
TGGCCACTGACATGGGTAGTATGCAGGAAAGAATTACCACCACTAAGAAAGGATCCATCACATCTGTGCAGGCCATCTT
CGTCCCTGCTGATGACTTGACTGA
>00163 2 reads, 1321 bases
AAAAACCTTTTTTTTTTTCTTTGCTTTCSWAGTCCTGAGAATGAACCCAATATGTGCTTCACTACTTGCCTTGTTCGCT
GTGTTAACCCTGACGATGTCTGCACCTTCAGGACCGACACTGAATGATCTACAGACCATCATTTGCCCATCAACTAAAC
CATTTATGTGCCTGCCCTACGGAGCGTGCTGTAGCGGTTCTCAGTTCTGTCACTCGGGTCTGTGTGAGAGCTGCTTTCC
ACTGGGCATCGAGGAGTCAGCGCTGTTGGAGTGGTGTAGGGAAANNNNNNNNNNAGGGACAGTATGACGTCACGTTGAT
GAGACACAGGGGCTGTCGCCTGGCGTGCCAGGACATCTTCAACTCGTCACAGTTAGCACACAATGNNNNNNNNNNAGTC
TGGGTCAGTCACCATCTTGGAAAATTCCTCCCCACCGACCGGCTCAAACCTACATGACGTCATTGAAGACGATGGAACA
CGTATCGAAAAGGTGATCATACTGTTGTCTATCAGCATATTTYTAGTCGGCGTGTGTCTGGTTTTGAGTGTGTCAATTA
ACATCTATCTTGCCAGGAACMGATACAGATTGAAGGAGACAAAAACTCCAGCTCACTCGCAGAGTAGCATCGAATCTGA
CGAGAGTGGTCTAAATAATAATCTTGGCGGCAATCCCGACCAAAAATCCCCAGAATCGGACGATGCAAGCACGCCACTG
ATCAAACACGAAGGTGGTGATGATAAACAAAATGAAAAACTGGTGGTTGACATCGAAACTGATGACAAGGACTTGACTA
ATAAAAGAGTATCCAGGCGAGACAGTTCATCTTCACAATTGTATTTAACAGGCGCACGATCGATTTTTGCTATTGACGA
ACNNNNNNNNGCACAAAGAGCAAACAGTGCGATGGAGCGAGAAAACTCAAAGATGTCTCTAGATGATGTTGATATACAC
AACAAAGAAGACAAACCCCAAGCAATCGCCAATGTTAACATTTCAGATGTGGATTTTCATCAGTCCCAGCACAGTCTAC
AATCCCAAGAAAGACAAAAACCAAAGCTGCCACTGAAAACGAATAGCACATTCAGCCCATGATTCGAGCGGTTTATGGA
TACATTCATTAAGGGAAAATTACGTCAGGTCTCCTCGAGGGGACGAATCTCATGAGCAGGGAAGAAGTGAGGACACATA
CTTATAATGTTTTAAATATGATATTTACAAGCAAGTCATCTTATAAATCAAAGAACCCTGTGATAAATAGTGGGGACAA
CCGTGTTGACAATATTGATATTTTGAACGCACCAAAAATTGTTGTTGTTTTTTTTAA
>00164 2 reads, 1356 bases
GTGTCAGTGTCAAATAAGGGGCATGACCATAAGACTATGTTTTCCCATCAAATTGGAAGGGAGCATCAAGTACTGGAAA
CATAAAATTTGATGATGATGCTAGTGGTCTAGGAGCATATGAATTCACTGATGATGAGGACCTTGCTGGTTCTGGCTCA
GGTTCTGGCAGTGGTGATGGTGTTGTTCCAGCAGAAACTGAAGTGAACACAACATACAGCACAACAGTGACCACCACAT
CCACAGTATCCAGCAGACCTCCCACCCACTGTGAACTTAACTACCAGAGTGGTAAAGCTGTTTCAGGCCTCTTTGTGCC
CAGATGTCTGCCCAATGGTGACTACGACTCGTTGCAATGCCACGGGTATCCTGGCACCAGTCAGTGTTACTGCAGTGAT
CTGGAGGGCAGACAGATCCCAGGCACTTTGATGGAACCACCCAAATTTCCCAACTGTGAATCTGGTCAAAATCTGAATC
CATGCACTTTCCTTTCGGTAAAACACATTCGTTCCAAGATGGTTGGCGCTTTTCGAGCCAAGTGTACCATTGATGGGAA
CTTTGAGAAAGTCCAGTGTCACGGCAGCATGTGCTACTGTGTGGATGAAGCTAGTGGAGTCAAGGTGCCTGGCACTGAA
GTCCATCTTCCAGACAGTCCCAACTGTGATGATGATGAGGAGTTGACTCCTGTATCCACACCCAAATCAACTAAGGACG
AGACATCTATTGAAGAGGAAAAGATTGACATAGATGATCCAACAGATAATACACCAAAACCGGTGACTGAAGAAAATGG
GACCGTGCTGATTGATGAGGAAACTGTTAGTATAGATCAAGACAAACCAGACAGCAGTGAAAAAGAGGAAAACACTGAA
GACAACAAGACTGGGACAGGCCACAACAGTCAAGCCAGCGTTGAGAAGGCGGCCTCTAGTGATATAATGACACAGCCAG
GTATTTTAGCCGGTATAATTGGAGGCTCAGTCGTTGTACTCCTCTGTGTGGTTCTCCTCATTATGTTCCTCATTTACCG
CATGCGGAAGAAAGATGAAGGCAGCTATCCATTGGATGAACCAAGGAAACCACCCAACTATTCCTATGTACGTGCTCCG
GAAAAAGAGTTCTATGCATAGAAGGAAACAAAAAGAAAGAAATTTGAAAATTTAAATTTTTTAAAATGAGAATCTAATG
CTTTAAAGAGAGAAAAGTTTAATGCTGCACAATCATGGATGAGAAATGCATTTGCTAACCTAGAACAAAACCTGTACAA
TACTATAAGATCASTTGGACGTACTTAATCATTTTGACTGATGATGCTATATCATCTACAAGATTTAAAAGTGTGGAAC
ATAGCCTTTATTG
>00165 2 reads, 1224 bases
TTCGCCTCTTCTTTATTTTAGCAGCTTGCTAAAGTTAAAGATAGTAAAAACTTTTCCCACATGTACGGGTTCCGCTTGG
ATGTGTACAGTGAGACAGACATCCTTGCCCTCCACTCCGACTACATGAGGAGCGACGACAACAACATCACCATCAAACT
CACCACGCTGGAACCAGTGTCAAACATCCGCATCGTTCTGGGCAACAGAAACCCGTACYTGGAGAAGTACATCGAACTG
TGTGAGTTAGAGGCACTAGGAGATTGCTCGCCGCCCTATTACGGCTTGTACTGTGAGGGAGTCTGTGGTACACGGTGTA
AGGACCGCCGGTGTCACTACAACGGATTTTGTTATCATTGKCTGGATAAAAGCCTTGGCAAACGTTGTCTGGATGATAT
TCAGGTCAAACCTTTATAGCTTGTCGCAAGGGGACATCACTGTCATTATAGTCGGTTCAGTGTTTGCTAGTTGTGCCCT
ATGCTGTGTCAGTGCTTGTCTAGGACGACTAAAAGTACAATGTTGTCCCAAGAAGGAAGCTGTCATCGCAAAATCAGGA
ACTGTCCTCGCTAAATCAAAGTCTAAACTGGTGACCAAGAAATGATGGACCACACAAGAAGATCTAGTCGCACGTGGAC
ACAGTCAAAGACACAATGAATATACTTTTTTTNNNNNNNNNNTACAACTCTACTGCCACCGGTCCATTATTGATACAGT
CACATTGTACTTAAAGCCATGTACCTTAAAACTTTATTTAAATGATTGTGTGTCTTAACTAAAAATATTGTGAATCCTT
GATCTAGTTTAGGTGAAACCAAATTCTTCTCACAGTGGCCTGGCCAGGATGGCTTAGAAAATGACAAAATCGTGGGCTG
CATAACCGTTCTAGAAGAAAAACTAAGTTTATGTTTAGACTTGGTGCTAATCTGTCATCATTGATCAGTGAAGGGCAAC
TAAAAATATTCTATCAAAATAATTGAAAATAGTAAATTCTACGCACAAAGCAACATGGTTTGTCACGCAAGTTTGCTTA
TCTCATAGTCTAGCTGAAATATTTAAATTGTTTCAAAACGTCTTGTTTTATTTTGTATCAAGCATATATTTATTATTCA
AGTACTGTCTGTGGGCCAGATGAAATGGCGTCACGTGTCGGATTGGGCCCACAGGCCGTAATTAGGTGACTCCTGATCT
AGATTAATATTAACTATGACTTACATTTATGACCGACAA
>00166 6 reads, 1293 bases
ACTTACAGCATAGTACCGGGGATTGTGATGACTACAAAGAAGACTGTGAGAAGGCCAAACAGAATGGCTCAAATATTGT
CTATGCTAAAGCTTCCAGCGAAAAGCATGATAATCTTTACTATGTTTTCAGCACCATTGGAGTTCCAACAATTATTATA
GCTCATACCAAAGAACAAGATACAGATTTAACCTTTAATTGGACAAAAATCATGGAAGCAAATGAGTCCTTAATTGATG
CCATCAACTTTAAGTCTCCTATTAATGAAGTTTATTTATTTGGCGTGGCCTTTACCAGGTTGCTGGAATATGATGACCA
AGATGACTCTGCAGATTTGGAAGAATGTGAGAAGAAACTGAATGCATCAAGCTGGAACATCAGAGATTTCAGTCTGTTT
ACATGGGATTCTGCAGTTGTTGAAAAAGATAACACCTTTGTATTTAACACAACATCTGATGTAAATCTTAAAACAAATG
AAACCCGCAACGGCAGCATCAGTTTTGCTTTTACCGTGAAAGGAGAGAATGGAAGAGGCTCAGACTTACCGAGATTGTT
GTTCAACTCCAATGAAACATTGTTTGACTTCGTCGTAGCCAACTACACGCCTTCATTTAGCAATTCACGTTTTGCCCTT
GAAGTCGCTGTCATCAGTAAATCCAAAAATGAAATGGACGTGGATCTTACAAAGTCTATTGATGATGAATATGCTCCAG
GTGTATTTCAGATAACTGACTGGCTGACTAACCCCCAAGCACGAGAAACTTCAGGGTTTTTCCAGTGGAAGCCTGTGGC
TTATATCAGTAAGTCCAGGGGACGTAACACTGCCACGGAAGTGAACCACTACAAGTTAAAAGACTTAACCGATCGACCT
CATCAAGCTGAACAGCTCAATGGCACTGTTATTTGGGCATTCAACTCCTCTTTGTGGAACGACAAGTCTGTCATTATTC
GCATTGCAAATATTTCATTTGGTCTACCCAAAGATGGTTTCTATGTCAAAAATAATTACACTGCATGGTCTGCTGCTGT
AGGCTACGGCAAACCTCCAGAAGATTCCATTTCAACCATGGTCATCATCATCATCTCGGCAGGATTGGGAATTCCCGTT
GTTATTATTGTTTTTGGTAGTATCTTCACTGTCGTCAGGAGATTACGTCATAGAGCAACTGGTTACATAGCTGTAAAAT
GAGACTCGACTTAATTATTGCCAATGCCATATTTCGAAGATTTAAACAATATAATGAATAACACACCAGGCATTGACTA
GATCTTTTTAAATAKAWMRRATGAGGGAA
>00167 2 reads, 992 bases
CTTGGCGAGAAGGCTAGACAAATTTAATWMGGTTAAAGGTTAATCAAACTCCAGTTCAACTTACTTGTCTACAAAGGCT
AGGACATTTAATAATATATTTAATACAAACCAGTGTTATTTCTATCTGTCAAGCTTAAAGTAATGATCATGCCCTATTT
TTCTATTTAATATGTTGATCTATATCTAAGGCACAATTGACCCTAACCACACAAAACTTTTGTTTAGAAACCTGGCAGT
TGTGTCCTAATGAAGGTGTGCCGTCATTTGTTGTCATTACAAGTTATAGTACACCAGGAAATGTCCATGAAATCTCACA
GACACCTCAAGATTTATACATGATAAACAATAATTATGGTCTGGTAGGAAGTTACCAATATTGTTGTAACAATAACATA
AAGAGAAATGTAATAATTCATTGTTCTAAACACAATTCAAAACCATAACCCAAACAAGTTGTTATCTGTCACTTGGTGT
TACACTCTCTTCCTGTCCGTCATCACTCTCATTATGCTTCCTAGTCCTCCGGCAGCAAAGGTCTTCTGGTGCCAAGTTA
AAAGAATCGCGCTGCTGTTCTCTGAGGGTGTCTCAAATCCCCTGTAGATGTACTTCATGAGGATGTCTATACTTTTATT
GTCTAAGGATTTGATGCACTGGTCCATGTCACCTTTGAATGATGTTAGAACTCTCACTGCCAGATTCGCTGCCCTATCC
TTCACAGCTTGATTTTTGGAATTTGATGGAGCATTCTGTAAAACATGCAACAAGGCCTCTTGACTTTTATCTCTTGCTA
GGAGGTTATTGACTTCAGTTTCACTTGGGCCTTGGTCGACTCCTGAACCATCTGCATCTTCATCATCTTTGAATCTGTC
TTCGTCGAATTGATCTACATCTACTTTCCTAAATTTGCTAGAACCTGTGTTTTTTGCCATTCTTTAAATTATTTATTAA
CTGCCACTTATCACGAGAATTAGTATTACCCTGTTATCCCTATT
>00168 8 reads, 963 bases
ATATGTCATAAATATATATATTATAACATGAGCTTATGTATAGCGATTTTGTAATAACAGATATGAGGTGAAATATTAT
TTTGAAAATATTTCTTCAACAGTGGCACAAGCTGAGCTCAACAATCTCATAGCGGAGAACTACTTTACAAGAGATACTT
GTACACCAGGACACCAGCCACACCAACAAGAACAGCAAGTCCGAAATAAATAGAAGAACGAAAGTAGGGTTTGTATGGC
CTCCAGCGCTCACTTTTCTGCTGACGTTCTTTCATTCTGCGCAACTTTTCCAGAGTTTGCATCTTCCTCTCCTCCCTGA
TTCTGTGTCGTACGTCCGCTGCCCTTTCAGTGTCGCTGTCTTCACTGTCCCTCCCAACATCTTCATCCCTGTCAATCAG
CTTGTCAAACTCTTCATCATCATCATTCTCTGCATCCGACCATCTCTTTGATGATTCCTCCAGCTTACCATCCCAGCCT
GAGTAGCCTGGTTGTCTTTGTAGGGGGCTCTTCTTAGGTGGGACAGGAGGAGGCAGGTTTATCTATATTCTGTAACAAT
GTCTCCACACTGGGGATTTTAAGCTTGGGCAGGAGACTTGTAGTGCGCTCAGGGGGAGGTGGGGGACCTTCTAGGTGGT
TCTGAAGACTGTTAAGTCCGCCACCATTGAGGATGACATAAGCACCTTGAATGATGGCAAGATAAGAAAATCTTAGTTG
ATCATGTGTTTGGATGAGACCCATGCGGTAGAAGCGCATGTGTAGAAGCATTTCTTTTACATTGATGCTGTTCAGACTC
CCTGTATTTTCCACCAAGACAAGGCAGGAATCAACCAAGCAGAATGTTCCAGAACGACCAATGCCAGCACTACAATGAA
CTATGGCCGGGCCAACATTTGATTWCYMATGATCCTGTTTGCCGCACACAGTCAAGAAAATGGAGAAAAGCTACAGGTG
ATGATGGCACCCCAA
>00169 9 reads, 1130 bases
TAGGGATAAAAAAAAAAAAAAAAAACCGTACGCAGTTGAAAGAAGATTCAATGCTCTAAAACAAAATTGGTAAACAAAT
ATTTATGTACAAAACTTTACTTAAACTGCATCAATTCAAAATGAATTTTTCTTTCAATTTGCTGAGGTTTTTAACAAAA
AATGTTATTAATATCCTATTCAAACTTTCACAGCTCTACATTTCTGTTAAGGAGATTGAGCGCTGACCTAAGCATCCAT
AAACCAGACAAAAATTCAGATCCCACAACAAACGAGATAACATGAACTGAAAGCTGCACAAAACATTGTCTTGTATTCT
CGCACCTCCTGTCTCTTTGTGATGAGAGCACTAGCTCTGATAGGGATTGTTGTCTTTTGGTTTGCACCATAAAGGTGGC
ATAGTCTTGGCGACAAAAAGCTGCCGCACTATCACATATATCACATCATGTTTCGCAATGCCTTTCCGCTCTTGCAGTG
GCAAAAATGTCATCAGAGTAAATAGAATCAGCCCTCAGCCTTGCCAGTAAAGATCGGGACAACCCTCTCAGGGCTGCTT
CTCTACTCAACTCTCAGAATTCATGATCTAGTATATGAGGTTTCCAGCTGTTTGGCAAGGCAAGGGAGAGGGACGGAAG
AGAGTCACAGGAAGCGCCGAGCCCCTTTCACAGCCAGCCCTTCTGCTTCCATCCTCCGAGACGGCGGCGTACAATCCAA
GAAATCACGCATACAGGACCACACATACGGCCAACAAAAAGCAGAGATGCATCACAATAGAAAATAGTAGTTCAGCCAT
TGAGCTGGCAAAAATCACAGAAGCTCATATTGTCGTAGGTGCATTCGCTGGATGATATCTCTACAGTCGTCAAACACTC
GACGGATGTTTTCTGTGTCCACTGCACATGTAAAATGAGGATAGCAGTAGTGCCGCCCATCTCCACTTGCAGTGCTAAT
TCTCAAAAATTCATCCCTAATGAAGTACTTTGCTCTCACTACCTCAGTGTCTTCACCAGGCTCAGATGAGGCATCAGGA
GGTACCTGATATCTGGCATATTCGGGAAAGTAATCTTCTATCTTTGATTTTCCAGCTTTAACTTTCTCAGCTAAAAGAT
CTTGTTTGTTTAAGAACAVATCRG
>00170 11 reads, 1284 bases
AACTAAAGGACGTAGTCAAASWACTRCAWGTTCGCTTCGATATCGCCTTGGATGAACAAGAACTTGTCAAAAGACTTCT
TGAGTGGGTTGTCGAAGTTTATCAGTACCACCGGACACGACTTGGGGATCAGCTCCACCAAGAAGGCGAATGGGTATAC
CTTGAGAGAAGTACCAGCGATGAACACCAAGTCCGACTGTCCGATCTTTGGGATTTCGGCGTGGAAGTGCGAAGGCAGT
GCTTCTCCGAACAAAATCACATCAGGTTTGACGGCTCCTCCACATTCACACTTGTAGACCTTGTCTGCCAAGATATCAG
CCTTCAAAGTCTCGATACTGTAGGGTTTGCTGCAAACTGAACAAGAACAAGACCGAATGTGTCCGTGCGCTTGGATCAT
TTTATCCGAAGACAAACCAGCTAGACTCTCGAGACCGTCGATGTTTTGTGTGTAGTATTTCAGGAGCTGACCTCGCTTT
TCGATTTCTGCAAAAAATTTGTGACAGTTAGTTGGCTGGATCTGCGCACCAAGGAATTCCTTCATGATGGCGTACAAAG
GCTCCGGGTTCTTTTTGAAGAACTCGATGGTCATGATCTCCTCCGGCGAGGTCAGTCCATACTTAGCAGCTAATTGGTG
ATAAAGCCCGCCAGGAGATCTGAAATCTGGAATACCTGCTGCTGTGCTGATTCCGGCTCCTGTGATGAAGCTGATGTTT
TTGAAGGTGCCATCCTTGATTCCCTTCACCAACTCCTCTCTTTTGAAAGATGACTGGTTTCCGTTCAACTGCATGAGTT
TCTCGAGAATGGGCTCTGTGACATCGCCTTTGAGGATGTCTCCAGGTCCGACCTCCATTTTGTGCTTGATGGCACCAAA
GGTCTTCCTGAGTCTGCCGAGCTCGAGGGTTGAGATGTAGCTATCGCAGTCGTAGCACCAGAACGACCCATCGGACAAA
CTGAAGGCCACCGGATGATGTGTGGCTTCGTTGTGTGCGGCCATGTGTCCCTTCACGTATCTCGAACAGTAGATCTGTC
TGCACTCCAGACAGAACCAGTTTTCCTTCTTGTCCGAGCAGCCTGAACACTCCAGAGCGGAAAACACATGCGTCGGCGA
GGTTTTACTGTAGTTGGCCAATACTGAATCCAGGAACTCAGCGAAATGCCTTCTGAGGGTCGAGTTCTCGTGAGGACAG
TCGGTCCTCGGCTCCACTGCGAAGAAGTCGGGTTCGGGTTCAGCGTAGACTTGAGGTTTCTCTTCGTCCATCCTAGGGT
TGAGCAAGCGGTTATTACCC
>00171 3 reads, 1111 bases
AGAGGTGACAGGAAGTAAAGSAATTAATTAYGTCCAGGCCTCCAATTAATTCCCCTTTCACATACAACTGAGGATAAGT
TGGCCAATTGGAATATGTCTTCAGCCCTTGTCTTACTTCCTCATCGGTTAAAATATCAAACGTTGTGTAAGGAACACCA
ACTTCATCTAGAATAGCAACAGTTGTTTTACTGAATCCACATCGTGGAGCTGATGGAGTTCCTTTTATAAACAACACTA
CTGGTGACTGATTGATGAGATTTTTCAACCTTGTATTTAGATCCTCAGTTTTAGGAATCATGTCTTTGAGCTCTCCTGA
CTCCACCATTTCTTTGACAATATCAAGTCCTCCCAGAAGTTCACCTTTCACATAAAGCTGAGGGTAGGTGGGCCAGTTT
GAAAATGATTTTAGACCTTGACGAACATCATCATCTTCTAATATATCAAAGGTTGAATACTGGATCCCTTGCTCATTCA
AAATTTGAGTGATTTGGCGACTGAATCCACATTTTGGTGCCTCTGGGGATCCTTTCATAAACAGCATAGCAGGTGCAGA
ATTTATTAGTTTTTTTAACTTCTCATTGAGGTCCTGCTTAGCTGATGGCTTATTTAAATTTAAATCACCCACAGTGCTA
AACGAATGTTTAGTTACTTTCTTTGTGAGTTCAGCAGCATTAGCCCCATCTAATCTGTCTATTTGTTTTCCAGACTTAA
GAAATATAAATGTGGGTGCAGCCACAATCTCAAATTTGTAAGACACTTCAGCCAAACTCTCAGCATCTACCGTGAGAAA
AGTAACATGCAAGAATTTGGGATCTTTGGAAAGTTCATTAATGACTTCACCCATTTGCTGACATTGCTCTGCCCATGAT
GCAGCAAAATGAACTACAACAAGATGACCTCCTGCATCAGTTAAGATTTTATTAAACCTCTCGACATCTTTGATCAACT
CCACTGTGTTGGAGGCTAAATTATTGCTGTCAGTCATTGTTATTAATTTTGTTAAATCAAAGAGGTTTTAAAAGTTTGC
TGTTAATATTTTCTGAGTATTTCCAGGCAGGTCTTTGGTGGACATGGATTATCTTTAATCACMMTTTTTTTTGGTAATT
ATTAC
>00172 20 reads, 1491 bases
AAAAAAAAAAAAAAAGTCAACTTTTTATGTAAGTTTATTAATTAATTCAACAAACAATACATATAAAGTGCTGCATGAA
TGAATCAAATATTTGAGGAGAAACTTCATTTTGACAGAACCAGCCCCCATTAAGAAGTCTAAAAAAGAAATAGTCTTAG
ACCCAAAATGGGTAAAGTAGAGTGGGCTCTTCTGTGTTCCTGTAAAAATAAAAACTATGCACCATCTACAACCAACAAA
GTATTCTATACAACTTCAGAACAATAGAATATAAAATAATCTTCACTAGCCTAATGAGAACAAATTTCTTTTTTTAAAA
ACATAAAACAAAGACATGAGAAATTATGAAACTAAATAAATACTCTGTCCCAACTTCAGAAGGGCTAAAAAAAAAGTCT
GGCCCTCTCAGTAGATAATGGCAAAATAAAGCATACCTTCAAATATGACTTACTATGCACCAAATAAATGTTTGGGGGA
AAATAAAATTAAAGTAGAATAGGGCTATATACCTAATCCTATCTTATGATAGTCTAACCACAACATGAACTAGGAAATA
ATAAATGTCAACATATGCATGCAGCCATAAATTTAGTACCCCACCTATGCCTCTCTAAATTGGAAGAAATTTCGTACAA
CATCAAGTTACAAGAAATCCCTTGCAACCAGCAATCTAACAAAAAAATGCATTGCAATAATTTACTACTTGCATAAGTC
AACTGAAACTTTAAGAGGGGATGGTTATGAGTGAACATAAAATTAGGCATTCATTATTTATGCAACTTCTTAACTCTTA
CAAATAATAGTAGGATATGGGTTGATTATTTTGCAGAGAATAAAATAAAAGCATTATTATCTCTTTCAAGCAAAGCCCC
CTCTTTATGCCTGCATGACTCAATATGTTGGTATCGAAAAAAAAAAGTAAGTCCCAGCCAGCTAGTTACAAAAAGAGAA
AACACAAACTTATCAAATGCAAGAAAAAAAAAATCAAGGCGGTCTAAGTGAAAATAAACATTGGTATTTGACGTGTTCT
TGACAGTGGCCACACAATTGAGTGGTGGATCTACGTGCATGCCTGTTGATGATTTTCATAAACAATTCAAAAAGGGGCA
TTTCTTTTCGGTTTCAGACAATTTTTTGTATGTTTTCAATTTCCAAGAAAAATAACCAAATATTAACAATCTTGTGACC
TCAGCAGAGAAAAGTTCATTTAAAAAGACAAAAAGACTTAAAGAAAAGAACAAGAGAAACATTTATCTTATAAAATATG
ATATGAACAAGATTTTGGTTTTTTAAAAAATTGCACAATTCACTATNCATAACTGTACAAAAGAATAGTAGTCACCCCT
CATACCAATCTAAAGAATACATTTAGAACATGTGACAATTGATAAGTTCCTGCACAATGCACTTCCTTTGAATGTCAAA
TCAGTGTTCAAAAATGTCTTTGAATTGATCTCAGGGGCAATAGATATGACATTTCTATCTTAATTTTAT
>00173 6 reads, 1345 bases
AGAGTAAGCCCACAATCTAGWCGYRYWATWATGAAATCAAATCTCTACCTGATGACTTTGGCTCTTTGGTCAGCTTACA
GGTATTAGACTTGTCTGGAAATCGACTGAAAGCTCTTCCCAAGTCTTTTGAAGAAATCCCAGTCTTACTGACACTTAAT
CTACGGAATAACAAATTCAAGACATTCCCCGAGCCCATCTGCCATCTCAAGTGTCTGAGAACTCTGGACGTGTCCAGCA
ATGAGATCGACAGTCTGCCTGTTATACTCTGTCACGTCAAAGCCTTGGAGACCTTGATCCTAGATGTTGATAGAATGAA
AAGTCCAGCACCTGATATATGCAAGAAAAGCACAGCAGCTACTATGATGTATTTATGTAGCTTAGCTGGCATCGAATAT
GAACATCCATCAAAATACTGGCTCAAAATCCAGGCAGCCAACAAGGGTCTGAAATCTTCTACCAGTGACGGGTACTTGA
ATGTGTCGCAGATAGAATCTCAAATGATGGAAGGAGTTCGGGCAAATCAAGTTGTTCTTGACCAAAAGAGGAAAGATGC
CGAAGAGCTGGAGAGAATTTTACAGTCAGAACAAGAGGCTCAAGCTCAGCTAGCTGCACAGGCAGCTTACGACCACAGA
TTGCTCTTGTCCTCTATCACACAGAACACAGAACAAGACAGCCAGGACCTTGAGTACCTCAACAGCAGGAAAGACAAGG
AGAAGGAAGAGTTTCTCAAGGATTTGTATGACATTGAGAATGGTGCCAGCAGTCTTCTGTCCCAGATACTGGACTACAA
CGCCAAGGCCAAGGAGACGGAGAAGTTGTTGGAGATGATGGAAGAAGAGAGAATGAAAGAAGAAGACTGGTTGAAAGTC
AGATGGGAGGAGTTACAGAACATTCGGAAAAAAGAAATACTGGATAACATGAAGACAATGTTAGTGGAGTTTGCCAGCA
TGGAGGCTGCCAGGGAAGACTTGAAACTCTTCAAAGATGAGGTTCTCAGAGACGCCATCGATGAGGAAAATTTCAGTGC
TGGCCAGATGCACAGTTTGATGGATTACAAAGACCTGGAGAATAAGAAACTTGTGTCCAAGCTTGCAGAGGAGGAAGAG
TTACAGAAGACAGCGTTTGAGGCCCTGCTTATCTCCCAAGACTCCGCCCACTCACGTATCCGAGCCCAGATTGCCCTGA
TTGAGTCGGAACTTGCCCAGCTGACGGCTGTGGAGATGGACCAGAGAGCTCGTCGCATGGAACATGAGTTTAATGTTGT
GGCAGATCAGAGAGTGGCTTTGTCAGCCATGTTGTCCCAGCTACTGGAGGAAAAAAAAAAAAAAAAATAGGGATAACAG
GG
>00174 3 reads, 1051 bases
AGAAGGCTAGATMTAYTGACCCTTGTGAAGATTTAAACATCATTCTACATGCAATTTTTAAACCAAATATAAAGAAAAG
AACATGCAGATTAATTAATGTGAGGTAAAATTACCCACATGATTTAAACTGAAACTTAAATACAAAAACTGTGGTTACT
CTTGCATTATGGTCTTTTAACATGAAATATCCAGTAAATTCTTTCAACATCATCAACAAATACATCTATTCCTATTAAG
CAATAAAAGAAAAATTATTTCGCAAGCAAAACGGTCAATCCATGTCAGTCCTCGGTAAATAAATATGTTTCGTTATCTT
TAAAAATTCTGACTACTGCTGCTCCATAATAATCCAGAACATATGCTAGAGCCGTCTGATGGAGTGAGTACCTGAGTAG
CTATCAGTAAAATGTCAATCAGTTGTCCCAAAAACATAAATCCTAATGCTTGCAAACTTCAGAAGTCCAATGGCTGGAT
AACCCAAGTAAAATCTATCCACTCCAAACATCCCCAAAAACACAGACAGTAGGAGTGCAGTCTCAAAAGAATGTCCATT
CGTCCCACTTGCAAGGAACTGTTCTATGGAATGAATCATTGTTAAATTGTCCATCACAAACAATACCTGGGGCACTTTT
ACACAAAACATTAACATGTTGTTTATCTTTAGAACATCCTCTTGGCTGTTGTGTCTCTGGGTCAATATCTGGTTCAGCA
CATAGATATTGCCCTAAAAGAAGGTCGGTACACTTAAGTCCATTATTTAATTTATTCTTTTCATCGAAATCTCCTTGTG
CCAAAACAGGATCTGTAGTAAAAACTAATGAAAACGTTGAAAGTAAGCTTGAGACTGTTGAAGCTACAAGAAACAAAGA
CTGAACACGACCAAAAGTTCGTCGTATATTAAACAACAGGTGCATTGTTGCTAATTTAAATTACAATCCTTTATCTTTT
GACAACGCCACACAATAATTTTGAACATGTTATGATGATTTTATYTTTTTTTTTTCTAAACACAACAAACAGCCGGGGC
ACCTCCTACAGAACTGATCGGAAG
>00175 2 reads, 753 bases
GACTTGGCGAGAAGGCTAGACAATATAATAAAATGAATTGATAAAAAAGTGCTTGAGAGTAACTGGAAGTTGTTGAAAA
TTCAGTGAAAATTTTTTACCGTTGGGGAAAAGGACAAACGAACCGAGTTGTGTAGCTAAATAAACCCATAGATATGACA
CCTTAATTATTATTTCATGCAATACAGTTTTCTACCATTGTTTCTTTAATTCAAACTAAAATTAACAGCACCACATTTT
AACATATGGAATAACACCATGAGATAGAATAACAAAATAGAAAACTCTTGAGGACAGAAGATCAAAGAGCAAAGTATTA
ACAACACGTAAGGCGTTAAATTCTAACCTGGGAAGTCATCGCAAGAATAATCTAATTAAATACGGACAGACACAGGGAT
GAAACACTTTTCTTGTTTCATTAACAAGTATTAACACTTGCAAATCCATTTTCTCGCCTAGCATTCAGGCGTAGAATGG
GTGGCCTGAAGTAATCAGGAAAGGAACACACTATCAACATTTAAAACTCTNNNNCAATTAGAAAATGTAAGACTTAACA
TAGAACATGGATGATTGTAGGAAAAATAATCGTTTGTATAGAAGGAGTGTTTGTAATATGTACGATAAAATAAGATAAC
CACGATCAAACGCTCTTATTAATGCATATTTTATACTCGTCATTGTTTAGAATACTAAACCCACAATTTGAAAAAAACC
CACTATTTTTAACACCTGGAAATTGCTTATTGAGATCGGAAG
>00176 2 reads, 850 bases
GGTCTTTGGTTTTAGACTGATGTGACAGTACGGGGACTTCCTGTGTCGCCCCGTTGTAGAGATTGAAGCACTTGTCAAC
GAGACCACAGTAGTACGGGAGGATGTCMWASAGYTTCTCGAAGTCGACTTAGCCGTCAAGTCTAAAGAACGCACACGCT
TCTTATCCAAGACCAGCGCTAACGACAACAGAGCCTCGGCCGCCTACGTCGGCTCCATCACTTTAATAGTTGTTGCATC
AGTGTTTGCTGCAGTTATTATATTTGATGTTGTGACGTTTTCCAGATACTGCAAAAAATGCTGGAGACCAAAGAACACA
CCAATKCCGGAAATTCAGCCTCGTGTTATTTATGGTGTCAGACCTCAAACTTTGGCTGAAAGATTGGGAAAAGATCAGG
CAAATACCAAAGGCTTTGAGGTCAACCATATTTCTTCTGGGGAAGTAATTCTTGTAGATAATGATGAGATGGTCTTCAG
TCAATTGTCTTTGGCACAAAATGAATCTTCAAAAAAATCACACATTGACCAAGCTGTGTGCATGCAATATGAACAAGGT
GAAGCACATTGGCCAATTGAAACATTTAGAAGGAAGTTCTTGCGCACCAGTGCGCTCCTGAAGTTCATAAGACCACCAA
CTCATTCCAAATATGTGGTTGATGCTGAACCAGATGATAAAGGACAAAACTGTTTGGATGCCATCTTGTCTCAAACAGA
ATCTTCCAATATATTTGAGAAATATGAACTTGCCTATGGCTATGATTTCTACCAATGAAATATTAATGTCAATTAGCAA
CGTTTTTTATTTCATTTATAAAAAATTGCTGCTATAAAATTTGTTGGATATAAAGTTTCC
>00177 15 reads, 1094 bases
TTCAGACCTTTGTATTAAATACTGASSWWSTGCCAACATGTCACTAGGCAGCGCAGTGTGCCAGCGTTGCAATGATGGG
TTCAAGATGGATGAGCAGATCGTCAACTCGAATGGTCTCTGGCACACATACTGCTTCGTGTGTGCCCAGTGTTTCCAGC
CATTCCCAGAGGGAAGGTTCTTTGAGTTTGAAGGCAGAAAGTACTGTGAACATGACTTCTGTGTTCTGTTTGCCCCAAG
CTGTGGCAAGTGTGGAGAGTTTATCAGTGGCCGTGTCATCAAGGCCATGAATGCCTCTTGGCACCCGGACTGCTTTCTG
TGCTTCAGCTGCTCCAAGAGTTTGGCTGACGAGGGCTTCGTCAAGAATCAAGGGAGAGCACTGTGCAAGGACTGCAATG
CTATGGAGAAGGCTAAAGGTCTAGGAAAGTATTTCTGCTTCAAGTGTCACTCCATTATTGATGGAGGTCATCTAAAATG
GAAGGGAGAACCTTACCATCCTTACCACTTCAACTGTCATTCTTGTGGCATCGAGTTGAAGGAAGATGCCAGGGAGAAG
GATGCTGAACTCTATTGTCTGCGATGTCATGACAAGATGGGAATACCCATATGTGGTGCCTGCAGGAGGCCCATAGAGG
AGAGAGTAGTGCATGCCCKGGGGAAGACTTGGCATGTTGAGCATTTTGTTTGTGCCAAGTGTGAGAAGCCATTTTTGGG
TACCAGACATTATGAGAAGAAAGGGCTGGCGTATTGTGAGATACATTATCACCAGCTTTTCGGTAACATCTGCTTTGTC
TGCAACAATATCATCAATGGAGATGTGTTCAGTGCATTTAACAAGGCCTGGTGTGTCAACCATTTTGCTTGCTCGATTT
GCGACAAGAAGATGAGTCAGAAGACAAAGTTTTTTGAGTTTGACCAGAAGCCAGTCTGCAAGTACTGTTACGACAAGTT
CCCAGGGGAATTAAAGAAACGTTTGAAGAAGGCTTACGACGAGGCTGTCAAGTCAGGCAAAGTCTAGTAACTACAAAAC
TGGGCATTAATAAGTGGGCTTATTTCAGGGGGAAATTACTCCACAATTTGTTAATGCTATATATCTA
>00178 2 reads, 719 bases
GAACAATATAATTAAAGCCTATMKWWWRCKATAGAAATTTTCTCCAAATAAAAAATATACTCCGGTGTAGTAAAATCCA
TATAATCTATTATAATTTATTTTATTTTTCGTCGTCTATTCGCCTCGGTCCATCATCTTTTGACGCTTGAGCTTCTTCT
TGGACTCCTTCTTCTTGGCAGGCTCGTCGACATCGGTTGGCTTCGGCACGACGCTCTCCTTCTCGGTCAAGAAGATCTC
GATGTGGCACGGGCTCGATTTGTACGGATTGATACGACCGTGAGCTCGGTAGGTTCGTCGTCTGGTCTTTGGTGCTTGG
TTAACTTGCACGTGATCAACGACAAGATGGTCGGCGTCCAAACCCTTAAGTTCAGCATTTGACTCGGCGTTCTTCAACA
ACTGCAAGACAAAGTCAGCCGACTTCTCTGGCCATCTACCTTGGCAGCTTTTGAACTGTTTGGTCTGAGCCTTTCGTCC
GACGCCGCCGTTGAAGCGCTTGAACGGTATGATCTCTTTGTGCTCGACGACGTTCTTCAAGTACTTGACAGCACGTCGC
AAGGGCATGTGCTTGATGGCGTGTCCGACCTCGCGCGTATTCTTGAAGTGCACTCGCAAGTACGAGCCGCGCGCTTTCA
CCGACTTCGACGGGTTCTCTGGCTCTCTCGAATAACGCGTCATTTCTCTCTCTTACTCTTYTTAAAATCTATCGGTCTA
GCGATTTC
>00179 5 reads, 1099 bases
ATCACGATCTTAAGACAGAACAAGWTCTGMWKCTTTAGCTATGGGATCTTTAGCATCTCCAATGTTACCAGCATATTCT
CTCATAATACCTCTAATAACTTTTACTGAACCACCCCGCATGTTCAATATCTGCATTACCCTGGCACGAATCGATGGAG
CTCCACTGGCACATGCCTCTAACATGATGTAATCTATAAGTTGAAGAGTAAACAATCCTGAGTCCAACCGCCTTAGGTA
AAACTCATCCTCCATGTCTTCATCTAAATTGTCACCACTTTGCTTCAATCTCATTTTCTCTCTCTCAATCTGGTCATCA
CAWTGTCTGACTTTATCCAAGAACTTGAAATGTAACTCTAATAATCTTTCAACCTTTTCATGATCGTTTTCAGTAAATT
TTAAAAGTAGCCTCTGTCTTGGGGTACCTTGACTGTTTCTCATCATTGATGCAATTATAGAACAAATATGCTCTTCAAG
CTCATCAGGGGAAGGCCCAGTCTTTGTTTGTTTTGGTGTTTTCATAAACAAGGGGAAAATACTACGAAGGCCCAAAATT
TCTATAAATTTCTGACAGTTGTCTTGGCCTTCAATGCCTGTCATAGCGTGGTTTAACACTTTGATTGCACTGTTGCGGG
ACAGTTTCTTTTCTCTTAACATTAGGTTCATAAGCTGTAAGCCCTCCCCTCTGAGAAACCTGGCTCTGTTGGCTGGATA
TGCTAGAGCTGAGCACATAGCATTGAAGAGGTTCTCCATGAGTTCCATTTCATCTTTACTTACAGGGTCGTGTTTCTTA
AAGCTTGCAAGTTGCTGCAGCAAAATATCAATGCCATCGAGTTCACCCAGCTGTTGTCGGTTTTCTTCTGAGTCTTGTA
GTAAAATAGCTAGTATTTCACTGCTGTATAATTTATTTTGATCAAATGGCCTTTTCATCCGTAATCTTTTCAACAACCA
CAGCAACAACCCTTGCTGGGCAGCATCTACACACATTTCAGGCTTGAAATCAGACATATTTTCAATGATGGCTAAGCTG
TTATGTACTCCTTCAAATTCTTCTTTGACATTCTCATCWAAACGTTCCAAATTATTGACAAGAACAGCGACC
>00180 3 reads, 1243 bases
AACTATACCGTCGAAGACATGYAYGTRACWGTCTCCAGTCACATCTCACTACTATGTTCTCCACTGTCAATTCAGATGT
TCCCCAAGAAGATTTTGGACGCCAGCTGTACTCCCTGTGGATGAAAATGATGGCAGAAACAATTGGTCTCTGTGTCTAC
TGTATACGTGATGGACAAACTGGCTTCTCCAATATGGTCCACAGATACATGCCTCGCATGACACAAGACATGAACCCAG
CAATAACTATTTGGATGACGACCTCATTACAAGACATCCTGGGTACTTTCCATCACAATCATCCAGTTCCCGAGTCAGA
CATCATGCGTTTTGTTGTCATTTCACCCACAAGTGGTGGAGCACAGGGGAGTGTAAAAAAAACAACTTCAATTTCACCA
GTTCCTAAAACAAGCCCCAAGTCTAACAGCCTCCCCACCAGAGTAACAAGAGGAGCTGAGGGTTCACAGAGGTCATCGG
CCAGCCCCATGGAGGTAGGGGACTCGCCTTCACCTCAGCCTCCAAGGGCTAAGGTGGCACGAACGATTCCTGAAGATGA
ACTTGAAACTAATGAAATCTTTCTTGATGCCCAAGAATCACTGGGCAGCCAGTCTACCCCTCGAGCCCGCCCCAACACT
ATTACCTCTGGTAGTAGAACTGGAGTCAGTCCAAGGACCTTGAGTAATGGCAGGAACTCTGAGGACTGGCGTACTGTGA
TACCTCAGGACTGGATACCTGTTATTGATCAGGACATTGTCAGACAACAGGAACAGAGGACCCAACCCCCCCTCAGTGA
TGCTTACCTTCAAGGTCTCCCTGCTAAACGTAGACGAATGATGACATTAGAACACGCAGGAGAGATGGCAAACATGCCG
ATGTACTTTCCTGAGTCTATTGCTCGTGCTGCAAGGGCCGTCGGTGTGGAACCTATCAGCAGTGAAGAAAATCTCAAAC
AGGAAGCAGCCGATAATAATGAATTGCAGGCAGAGCTAGAGAGGGAAGTAACTGCAGTTCTTGCAGCACGTGTCTCATC
AGATTCTGATTTTAACTCTGAGAGATTTCCAAACAGCAATGAATATTTTCACAAGTCTAAACAGCACTAGTAATGGTTG
GTGTCATAGACCCTTTGACGAATTCATCTGTAATATGGATGTGTACTGGATGTTTGCATGTGTGGGAGGGAGCTTTCCG
GTTTTTATTTATGTTGAAAAAGGACATTTTGTCAAAATAAAAATAAGTGTTGTTTTCT
>00181 6 reads, 1426 bases
CCTATTGTCCCATTRSGTMATAGAGCTCTGTTACGATCAAAGCGGCTAAAGAAGGAAGTTCTACGTATCAAACCATAAA
ATGTTTCAACGAAATATTATAGCAGTAGCAAATCTTGTTATTTTCGCCCTGTTGGTCGAGGCGGACATTCCTAACGGGC
TGGAGGTCGTCCACGAGTGGGTCAGGCTAGAATACGACTGGCCGTCTGACCAGGTCAAGGACAACTACACCAACCGAGG
CCTGTACGCGCCGGAGAAGAGCCACCTGTCCGGGATCGACGTCTACAACGGCGACATCTACGTCACCGCCCTCCGGATG
ACCCCGGACGTCCCGTCGGGCCTGAACAAGGTCATCGTCAAGGACGGCCGCCCCCTGCTGCAGCCGTTCCCGAGCCTCG
AGGCCAACGAGCTGGGCAACTGCGCCAGCATCCAGTCCCCGTTCTCCACACTGACCGACCCCAACACCGGCCTCATGTA
CGTGGTGGACGTTGGGCGGACCTGGAGGGGGCCCCCCAACTCCTTCGCGCCGTGCCCGCCCAAGCTGATGGTGTACGAC
CTGAAGAACAACGCCGCCCTGGTGCGCAGCCACCCGCTCCCGGAGAGCCTCGCCCCGAAAAACACCAGCATTCTCAACG
ACCTCGTCCTGGACTACGTCACGAGGCAGGGTCGGGAGGTCAGATACGTTTACATCACGGACATCGGCAGCGCCAAGCT
CATTGYCTTTGACCTGACGACCAACAGATCCTGGGGATTCCAGCACCCGTCCATGTTGACCGATGAGGATCAGGTCATC
GACTTCAATGGGGTCAACAACACGGAGCTGGGTTATCCAGTGGATGGCATTGCYATGGATTCGGACTTCCAGTACGTGT
ATTACTGCGCCATCGGAAGCCGGAAGCTGTACCAGATCCCAACTTCCGTTCTGAGAGATCCTAATGGCGACTTCGCTGG
AAATGTCCGACTGCTCGGGAAGAAGGTTTCGAACTCAGATGGCCTGGCTATCAGGGCAGAACAACATCTACTACGGAGC
GCTGACACTGAACGCTGCAKACAAGTGGGAGAAAGAGAAGGACATCGTTGACCAGGCAGTGTCTGAAGGCCRAGTGACA
CTCACCACGCAGTCGGAGGTGGCCAAGGATGACCAAAGGCTGGTATTCGTGGACAGCCTGAAAGTGGACACCGACGGCT
ACCTGTGGTTCACGTCCAGCCGCGCCCAGAAGTTCTTCGACGGCACCATCGACTTCACGGGCGCCAGCGGGAGCAACTA
CAGGATAAATCGAGTTTATGTAGGGGACAAGAGTTATCTTTCCCTCGGCCCGTCCGTCGTGGTTGGCTGAAATGTCGCT
CTACAAACAACTGAACCTCAAACAAAGAAAATCGTGTATTATTTTGAAAACAAAAATCGCGTATTAAAACATTTTAACA
AAAC
>00182 10 reads, 1112 bases
TTTTTATCCCTATTGTCCCATTATGTCAAGSATACCGGCATTTTTCAAAGAAAGAGTGATGGATTCATCCGAGTCGGCA
ATGGACACAATTACACAAGACGAAGCCGAACTTTATGACAGACAAATTAGATTATGGGGACTCGATGCKCARASGAAAG
TTACTGAGAGCCGCTACTGTCCTTCTGATTGGTATGAAGGGCTTGGGAGCTGAAGTTGCCAAGAATATCATTCTGTCTG
GCATTAAGGCAATTACTTTAATGGATCCAAACAAAATTGATGATGAAGATAAGATGTCACAGTTCTTTGTTTCTAATGC
TGCCACTGGACTAAATAGAGCTGAAACTTCTGTGTCTCAAGCTCGTCTTTTGAATCCAATGGTGACAGTGACCTCAGAC
ACAAGTGATCCCAGTGAAAAAGATGACAATTTTTTCCTTCAGTTTGATGTTATTTGTGTGACTTGCTCACCCCCATCTC
TGCAGCTCAGACTTGACAAGCTCTGTTTTGAGAATAATATCAAGTTTTTCTCTGGTGATGTTTTTGGGTTTTATGGGTT
CATGTTTGCTGACCTTGGGCTTCATGAGTATCTGCATGAAGAAGTTAAAATAAAAAAGCACAAAGAAGGAGAAGATCAA
TCAAAACAAACAGAAGAGACAATAAGTACAAAGGAAAAAATTGTGTTCTCAAGGTTAGAGGAAGAACTCAAATTTGACT
GGACAGCAGATACACCAGAAATGAAAAGAAAATTGCGTCAAACACCGTCAGCATTTTTCATAACAAGAGTTTATGAAGA
GTTTCTCGAGCAGCATGGACGCAGACCTCACTTATCAACTATTGAAGCAGATACCAAAGAACTCCAAAATCTTAGAATT
CAATTGTTAAACAAATTTGGTGTTCCAGCTAAGGTTGTACCAGAAGACTTTTATCTATATGGCTTTGGAGAGCTTAGTC
CAGTATGTGCTATTGTCGGAGGTGTCTTGGCCCAAGAAGTCATCAAGGCTGTGTCTCAAAAAGATGCCCCACTAAACAA
CTTTTTCCTATACAATGGTGTTAATGATGATGGCTATGAGGCTAAAATCTCTTATATTCCTTTAAGACTTTAAAAATGA
TCTTGC
>00183 2 reads, 1184 bases
AAAAAAAAAAAAAAAAATTTCGTCSWWWSWACCAATATGTTTGTTTCTGAGATACAGTGAAATTCACCAGGAGAAGTTA
TCAGGCGGTCAACAGTTGCCGAGGCCATTTCGGCACCTGGCAAGGAGTGCGTCCTGTGATCATCTCCTTCACCGAACGG
CAGTCTCTCGGGTTGTTCTTGCACACACCTGACTGGCAAAGGCGAAAGAGTTGTGCCTGGAAACTGTCGGTTGAATTTA
TTCTCGGCCAGACATTTACGGAATGTGACATCCTTGTACAGTGGACTGCAAGCTTGGACGGCCTGTAACTGAGTCGCCT
CATCCTTGCAGATTGTCTTAAAGTCTGAGTTGACCTTGTCACACACGTCATCCAAAGATTCGATTTGTTCCACGTTCTT
CAGGCTGAGAAAGATGACRTAATCTTCGATGCTGACTCCAGAATTGACAGCTGTCTCCCGGACACCAGGACCTTCACGA
CTAGATGACAGCTCGTTGTCACTGATACTCACTTGGTCCATGACGTCACCGCTTATACTCAGCACAAGGCCGGGTACCT
GAGACTGATGTTCTTTTGACCTCTCAGCTGGCCTGAACCTCAGCCTGAAACCAAATCTGTCGACAGCGGTTACCTCAGC
GAAGTTGTCCACTGTGTTATATGTGACATTCAGCTGATATTCACCCAAAAAGTCAGTTTCTGTCGATGGTTTTTTCCAC
GTGACATCATCTTCTGTTCGTCGCCACTCTTTGAACGTATAGACTCCACCCTCGGCGTAAGCCTCGATGAGGATGTACA
GTTTTCTCAGCCTGAGGCCCTTTCCGAAGAATCTTACTTCCGCTCTGTTGATGTAGTACTTACCTCCCTTGTACAAGTC
GTTATCGACATAGACCTCCACTCTGTCATTGTTTGGTGTCGTGTACTGCAGTATTCGATGTCGACATGGTGTCTCAAGG
GGAAGGAACTCATCGTACAAGTTCTTCAAATGTGGGTCAGCTTGGACAAAGATGGCGCCTACATCTTCAGGGACACAGC
CTAGTTTCCCATTGCCGATCAAATTGTGAGGACACTCGCACTTCTGCCTGTTGGCGCTGCACTTGGCTGTACTAAGACA
GTGACGCTTGTTGCCACACGACGGACCGGACTTTCCCTTGGTGATTGTCAACTTCTGTGCTGCTGTCAGGTGGACAAT
>00184 2 reads, 1067 bases
CCAATTTCAAATAGGATGTTTTTCCATTAATCTCTCGTTATTCAAAATATCAAAATACAAGCTATTCATTATATGCAAG
TAAAATGAGTTAAAATAATCAATTTAGAAAGAGAAAGTATCTGTATTTCAAACAAAATATTAACCAATGGGATCAGTCA
AAAATAATGAAMGGCATTCCATKYTGAACYGCTCTGCCACAAGGCTATCTATCAGGCAAGAGGTCGGCCAGTCTTTGAC
TTGAGCTACAATCTCAAACATTAAGTTACCAATATAAATAAAACATTGCTTTTTAAATCCATCAAAATGAGAAGAGCTG
ATGTTATTCATCATAGAAAAATAAATCCTGGAATACTTTGATAAATTTTGTATACATAAATGACCACCCACTGACATCA
ACCACCACTGAGAAAACTAACTACAGAATCACACTCTAGTCCTCAGCTATTTGCAGTTTTGACCTTTTTACGTTTGGAA
GGAGGAGATGTAATGACAGTGTGTTCTTCAAAGCTCTCATAATCATCATCTCCTCTCTCATCATCCAGAAAAMTGGAAC
TGAGCACCGTCTTTCCACCAGCTTGAGATTTCTGGAGGGCTTTAATTTGAGCCTGCAAATCTTCATTCTGCTGTTTAAG
GATGCTTATATGTTTGTCATTCTGCAGTGTTTTGTCTCTCATTCGAATAATGTATTCAGCAGCCTGTCTCAAAATTTGG
GCACGGGAAGTCTTGCTAGAGGAGTTTGTCTTTTGACACTCCCGTTCTGTGATAACAACCTTATTATCATCTTGAGGAA
CACAGTCACGAAGGCTATGGAAGCTGTCTTTAATATGATCTCTGCGTTTACGTTCTAATGCATTGTGGTGAGCTCTTTT
GTCATCTGAGCTAAATGTCTGTGGGCTTTCTTCATCATCGGCATCACTTTCGATATCAATCTCTCTATCTTCATCACTC
ATACTCATTTTAGAATGTTTGGAAACTGTTTACAAATTTCATCAGAAGTATATCGTTTACAGTATAAAATCACGTCCCC
GTCGCTCTAACACGCAAACCTCRACAKATTACSSGAGAGC
>00185 9 reads, 1033 bases
ACTGTCGTCTACGCCTTTCCASKMGAGCTAGAAGTCAACAAGAAACATCACTACCATCCTCACATGAAGATGCTAACAA
ATGGTTTTATAAAGATCCCCAAGGAGAAGTTCAAGGCCCTTTTACAAATGATGAGATGGCTCAGTGGTTTAGTGCTGGT
TAYTTTACCATGAGTTTGATAGTCAAACGGGGTTGTGATGATATATATAAACCTCTAGGAGAGCTTATCAAGCGTTATG
GCAGAGTACCATTCTTAGCGGGGCCACCGTTGCCACCATTAATCACCAACAATAGTGCAGCAGAAAATACCCTACCAAC
GACCCAAGCACTTTCTATGCCATCTTTAGTGACTGCTCCGATTCTTGGTCCACCATTAGTCAATGTTCATGATCCTTTA
ATGCATCAAGTATTAATACAACAAGAGTTCATTAAACAATCATTTTTAAGACAAATGCAGATGCAAACCTTACAGCAGC
TTCAAGAACAAGAGAGCTTCAAATCTCTATCTCCTGAACAGCAGCAGCATCTCTCTATGCAGATGTTGATGCAAGCCAG
CCCCATCTTTGTTCCACAATTACAGCAGCAGCAAATATTACTTCAACAACAAGAACACCAACGATCTTCATTACAGCAA
AATGAAGCTAACCCATCAGTCTTCCAACAGTCATCGTCTCCCTTATTAATGACTGCGCCCAACAGTGGCCCTGATAATG
TGGAGGAAGAGCCAGTTTGGGGTACTATGCCCCACCTTATGCCAGCTGGTTTATGGCAACTGTCTGCATCCCAACCACA
GCCACAGCCGACGTCTCTTTGGGAAGCTGACTTAAACAGTGGCAATTTATCACCTGCTTACAGATTACAACTAGAAAAG
TTGTTACGAGAAAAAGAAGAAGAGAAATTAAAGGAAGAAGAGAGGCAAAGAGATGAAGAATTAGAAAAAAGGCATGAAG
AATTAAAACGGCAGCAAGAAGATATAGAAAGACAAAGAGAACAGATGAAAAGGGAGAAAGAAGAACTAGAGAGACAAAA
GCAAAT
>00186 12 reads, 1198 bases
AGTCTGTGGTATTCCGGAGGTCGTTTACAKGCCATACTTTTTTCTGGTGGACTGGACTCTACTGTTCTGGCAGCATTGG
CTGACAAATGTGTGCCACCACATGAGACTATTGACCTCCTTAACGTAGCTTTTGAACAATCCAAACCAACACAAAGGGT
CAAATCAAGACAAGGGAAAAACAAGCACAAAGGCACTGGCCTCAAAGTACATTCGCTTGATGATGATGTCCAGACCAGC
ACACCATCCATGTTATCAGAGGCATCCCCTGAAGTTTGTCAACACAACAATTCTACATGTACACAAATAGCAACTGATG
TGTCAACAAATAATTCTATTCCAGATAATTCACACTTGTTAAGTAGGACAAATGATTCACCCTCTGATAAAGCTTACAA
TAATTTCTGTCCTTTTCAAATCATCAATGGTCACAGTCAGAAATATGACATACCTGACCTATCACCTGGCAATGAGCCA
TGTGCAGGTGAGAATAGAATATTTGATGCCTTCAATGTCCCAGACAGGCTAACCGCCAGAGTTGCTCTTTCAGAGTTGA
ATCCAAATCGCAAGTGGAACTTCATTGAAATCAACATCTCACAGGCCGAGGTTCAAGCAGTCAGGCAGTCTCGCGTTCG
CAAATTGATTTACCCCCTGCACACTGTTTTGGATGACAGCATTGGATGTGCTGTTTGGTTTGCTGCTCGTGGTTCTGGT
ATTCTAGCCAGTGATAAAGGCCAAGACTTTACTAGTAAAGCAAGGGTCATCCTGTGTGGTATGGCAGCCGATGAACAGT
TTGCTGGCTACTCTCGTCATCGTGTCACATTTAAAACCAAAGGATATGATGGACTGGTCAAGGAATTACAGGAAGAAAT
GTGGAGAATATCATCAAGAAATCTTGGAAGAGATGACAGAATTATAACTGATCATGGCAAGGAATCAAGATTCCCTTTC
CTTGATGAGACTTTTATACATTTTTGTAGCTCCATACCAGTTTTTAAACGGGCAGATTTAACTCTTCCCAGGGGTGTTG
GAGAAAAATTGTTGCTTCGTTTATGTGCCTACAAGCTTGGACTCCACTTGACAGCCTTGCAGCCAAAACGTGCCATCCA
ATTTGGTTCAAAAATTGCAAAAATGGATAGTAAAAAGGAAAAGGGATCTGATATATGTCAACGTCTGAAATAAATCATT
CTCATTATCAAAA
>00187 3 reads, 1084 bases
CATTATAAGGACACATTGCTCGCGTACGGTWATCAKTAATRYWATGAATCGGGAATCTCATATTGTCTGTTTTGACGTG
GGGGACCTATCAGACTGTGTGGACCAAACTGGACCAGATAGGACACTAACACTCCACTCAGTGGCCATCTGATTGATTT
GAAGCCGGTGAAGACAGCTTTGAGGCATCAGACCAAAGTTTTAACTCAAACTTGGGGAAAGTATGTCTGAAACTGAACA
CACCATCGACGTCCTCGTTTTGGGAGATGAAAACATTGGCAAGACAAGTCTGGCCAGAACCATAACCGAGGGAGCATTT
CCTATTGCTGATTCCTTATCTCCCTTAAACATTGAAAGTGCGGTTTTCTGTACCAAAAGTGAGACGGACCTTTTGGCAT
TCGACCTCACGTACCACATCCGGGTTCACGACCCGCCCAACGGCGTCCCAATCAAAACCGCACTCAACAAGGCGCACTG
CGTTTACTTGGGATTCGACGCCAGCTGTCCGGCCACATTCAACAGAGTCCGGCACATCTGGAGCCAGTATGTCAGAAAC
TGCAGAAATAAAAATTTGGTCACAATTGTGGTGGGTCTCAAACATGATCTGGCTTGTGACCCAGGTACCCAACAACTGC
TGACGTCAGAAGGCCTTCAGCCAATCACCTTGGAACAAGGTAACGCCTTGTCACGTGAGATAAAGGCTTCCGCCTACGT
GGAGGTGTCGTCTTTGCGCTACATGGGCGTACAGACATTGAAAGAAATTACAGTTTTTGAGTTTGTGTCCAGCAGCAAG
TTAAAGGAGAAGAAACGCTGTGTAATCATGTAGTATGATGTAGAGTACAGGAGACCCAAAGGATTTCTTTTCTTAGAAC
TACACATTTGAAACTTCATTAAAATACAAACGGGCAAACGAGGATTTCAACAAGTGCTGTCATAAGTACTAATAAACAA
ACCAAACGTGTTTAAATAGAACTGACATCGTGTGATGTCTACACTCACTGACATCGTGTGATGTCTACACTGACATCGT
TGATGCCTACACTGTATTCGTGTGATGTCTACACTGACATTGTGTGATGTCCACACT
>00188 3 reads, 1154 bases
AGATTTGAACAGCCGTGATCWSSTACTSARTTTTATTGAAGATAGGGGGTCAGCCAAGGAGCTAGACCAGTGGATTGAA
CAGCTCAATGACTGCAAACAATTATCAGAGAATCAAGTTAAAACTTTGTGTGAAAAGGCCAAAGAGATACTTTCAAAAG
AATCTAATGTACAAGAGGTGAAGTGCCCTGTTACAGTGTGTGGTGATGTTCACGGCCAATTTCATGATCTCATGGAACT
GTTTCGTATTGGAGGAAAATCTCCAGACACAAACTACTTATTCATGGGTGACTATGTTGATAGGGGCTACTACTCTGTT
GAGACAGTCTCTTTGCTAGTCACTCTTAAGGTTCGTTTTAAGGACAGAATCACAATTTTGAGAGGAAATCATGAGAGTC
GTCAGATAACACAGGTCTATGGGTTTTACGATGAATGTCTTCGCAAGTATGGGAACGCTAATGTATGGAAATACTTTAC
AGATTTATTTGATTATCTACCCCTCACAGCTCTTGTAGATGGCCAGATTTTCTGTTTACACGGAGGACTATCACCATCT
ATAGACACATTAGATCATATTAGAGCTTTAGATAGAATTCAAGAAGTTCCCCATGAGGGACCTATGTGTGATCTGTTGT
GGTCAGATCCAGATGACAGAGGAGGCTGGGGCATATCTCCACGTGGTGCAGGTTACACATTTGGTCAGGACATATCTGA
GACTTTCAATCACAGCAATGGTCTAACACTAGTCTCTAGGGCTCATCAACTTGTTATGGAGGGTTATAATTGGTGTCAT
GATCGAAATGTTGTGACTATATTTAGTGCACCAAATTACTGCTACAGATGTGGTAATCAAGCTGCCATAATGGAGCTGG
ATGATGCCCTTAAGTACTCATTTTTACAATTCGACCCKGCTCCAAGGCGAGGAGAGCCACATGTGACACGAAGAACTCC
AGACTACTTCCTGTAAGCCTGAACTTGAGATGTGATGAGACTAGGTTGTTGCATTATTTWTTGGACTGCCATATATTCA
GCAGGTTCATCACCACTGAAACATTGATACAAATCTGTTTGTAATCTACTGTTGACAAGGCGTGTGAATTCTTAAGAAT
ACATTGACTCTTCTGATGTAACAGCAGCAAATAGCTCATATTTTTTWG
>00189 7 reads, 1159 bases
TTTTATCCCTATTGTCCCATTATCTAAGCGCCTCGGTCGACTTTACACTTTCAGCAAGAATCCAAGCTGCGTCGCTCTA
AAGATGGCTAAATCAAACAGTCGCTTTGCTCAGTACCTGACTCCTACTCAGGAGAATGAACTACGTCAAATTGCTGCCG
CCATTGTTGCCCCAGGGAAAGGAATCTTGGCAGCAGATGAGTCTGTTGGTACAATGGGAAAACGTCTTGAAGGTATTAA
CTTACCCAATACGGAGGACAACAGACGCAAGTATAGAGAGCTCCTCTTTACAGCCGATGACAGTCTTGGTGACAACATA
AGTGGTGTCATTTTGTTTGATGAAACCTTCAGACAGTCCACAGCTGATGGAAGACCATTTGTTAAGGTTTTGCAAGAGA
AAGGGATTATTCCTGGCATCAAAGTTGACAAGGGTGTTGTCCCTTTGGCTGGTACACTGAATGAGTGCACAACACAGGG
TCTGGATGGTCTTGCTGAGCGTTGTGCTGAATACAAGAAAGGAGGCTGTGGTTTTGCCAAATGGCGTTGTGTCTTGAAG
ATTTCAGATCACACTCCATCTTACCAGGCCATGATTGAGAATGCAAATGTTTTGGCTCGTTATGCCAGTATTTGTCAAC
AGAATGGCCTGGTACCTATTGTGGAACCTGAGGTGCTACCTGATGGTGACCATGATTTGGAAACTGCACAAAGGGTCAC
AGAACAAGTTTTGGCCTTCCAGTACAAAGCTTTGGCTGACCATAACATATTTTTAGAGGGAACTCTTTTAAAGCCAAAT
ATGGTTACAGCTGGTCAAGCATGCCCCAAAAAATACACAGCAGAGGACATAGCAAGGGCCACAGTGACCGCTCTGAACA
GGACTGTCCCTGCTGCAGTTGCAGGAATTACTTTCCTTTCTGGTGGCCAGTCTGAAGAAGATGCCACCATCAATTTAAA
TGCTATTAACCAATTCCCTGGCCGCAAACCCTGGCCACTGACTTTCTCTTATGGCCGAGCTTTACAAGCTAGTGTGTTG
AAGGCATGGGGCGGCAAAGATGAAACTTTCAAGGCTGGCCAGCAAGAGTTGCTAAAACGTGCAAAGGCTAACGGAGATG
CAGCTGTCGGGCAGTACCAAGGTGGTGGTCCTAGTGTTGCTGCTGGAGATTCT
>00190 2 reads, 959 bases
GTGACTGCGGCACGCGGCCGTGCGTGGCCTGAAACCCTATTTGCCTATTCGTGAACTGACTTCAAGAGCTGAAATCGTT
CTGATTGAAAGCGACCCCATCTTGGACTATCCCAAAGTAGCCTTGCCCAACGTAAAGCTCATAGGCGGAACAGCKGTAA
CTCAGGCGGTGCCGCTGGAGGAGCCATTCAAGTCTTTCGTTGAGACTGCGGAGGACGGGGTGGTCGTGGTGTCCTTTGG
CTCATACATCCTAGACTTACCAGAGCCCATTTACACTAAATTAGCCAACGTTTTCCTGCGCTTAAATCTCAGGGTTGTT
TGGCGGGTCAACATGACCTCACCTGACTCAGACAAAATTCTTACGTCCACTTGGATTCCTCAGAACGACCTTCTCGGTC
ATCCCAAGACCAACGTCTTTGTTACTCACTGTGGACAAAGCAGTCAGTATGAGGCCTTGTTTCACGGGGTTGCCACTTT
GTGTATCCCCATTTTCCTGGACCAGACTTACAACGCCGAGAGGGCAAGGAGTAAAGGGTACGGTTTAACTGTAGATTTA
AAGAAAGCCACCGAGGACGAAATCTTGGCTCATATCCAGGAGATCCACACAAACTCCAGCTACACAACAAACGTTAGAA
AAGCGTCGAAACTATTTAAACTAAATTACGGTCTTCCCATGGACAAGGCCGCCTTTTGGCTGGACCATGTTATTAAATA
TGGCGGATCTTACATGAGATCAGCCGGCCAGTACATGCCAGGCTATCAGTTTTATTGTGTGGACTTGTTAGCACTTCTA
GCTCTAATTACTTCAGTTTCATTAGTGCTCTTTTACTTTATGCTAAAAACAGTTTTCAGGATTGTGTGCAATTTTATCA
GGGTTGTCAGCACCTACGTACATGACTCGATGGATTTTTTATTGATAATTTATTACAAAGAGATTAAAGGGCAGCTTTA
CTGACTATGAA
>00191 12 reads, 1763 bases
TAGAAGTGTTATCGGATTTCGACTGGACCTGATGTTTCAAAATTGGGGTAAAAGAAAGGATTTAGACAAATCCTGCCCT
ATTCTTTCTTGGTGGCAAAACAAAATTTTAAACTTTTAAAAATACATTTTTACCAATAACATTCTGATTATGCTCCTAG
TACATGACAAACTTTCATTTCAAAACTTAAGAAATTGTGTGTCAATTGTACCCTCAATCAGGCTCACTATATGGGCTAT
TTTTGGGATAGACAGAGAAATTTGTGTCTGTGTCATGACAGCAATTTTAACCTCCGCCTGAGCGAAAATGGTCTTAACA
AATATTGATTTTTTTTTCTCTTCTTTTTATTTRCGAGAACAAATTATMAGGCTATCACGCTGAACTTGAGATATTCTTG
TAAAAAGCTAAATACTTGAATTGTAATTTATTCTTGTTGCTCAACTAATCAAGTGAAGAAGTGCAGTATTGGCATTAGT
ATTAGAAATGATAGGGAGAAAAACATGATTGATGGCTATGTGAATGGCAGGCACTTATTTACAAGCTTGCATCAAATAA
ACAACTTGGTTTNNNNNNNNTTGCAGGAGCCTCAGCAAACAAGCTGTGATGAACCCTTGGTTGTTTCATGCCCCTCCAC
ACATGCTAAAAWTTTTTGCTGTATATCCTTTCTGAATGAACTGGTATTTAAATTTGATGAAATGACTGAAGGAAACAAA
AAAAATATTCTGGGTTCTCATGGCTGATTTGCTGTGTTTGCCGCAGCCAAATGATGGTTTCAAAACTCATTGAGACACA
AATATGATCAACAAGATAGAAAATTTGATTCCTGCTTTTAAAAAAATTGTTTCTGTCCAACACTTTCTTCCTCTAATTA
ACAACAATTGATTGATATTCTACCATGTGATTGTAAATGTTGTAATTCCAGAAAGTATTCTTATAATAAAGGCTCTTAG
TTGTCTGACCATAAGGTGCTCCAAATCGACACATCATCTGACAGAGCAGACATCCTGCAGCAATGAACAGTTTTGTGTT
TTAGCTCACAGATGTCATACTAAGTGGGGGTTCTTTACTTGCTGCCCTTTTTTTCTTGAAGTATCTCTTCTTTAGTTGG
CAGAGGGTTTTTCTCAGCTGTCTTGGCATGTTTCAGCTGGTTCTTCTCAAAGCCTTCAATAGAGTTGCGGAACTCATTT
TCTTGTTTCTCAAGCTGAATAGCTTCAGTGGGAGGGAGGGGATTTTTCTCCTGTGTTTCCGTGTGCTTGAGGCTTGCCC
TCTTGAAGGAGCTGATGGAGTTTTTCAGTTCCTGTTCTTGCTTCTCTTGTTCAATCTCGTCAGGGCTGGGGAGGACAGT
CTTCTCCTCGGTGGTGGTGGGCTTGAGATTGTCCTTATTGAATGAACCTATTCTGTCTCTCAACTCAGCCTCAGTCTTC
TCCTGGTTGATAACTTCAGCTGAAGGGAGTGGGTTCTTCTCCTTGGGGTCAACATGATGCAGGGTGCTTGTGTCAGTTT
TGTTAATCTCGGCCAACAGTGCAGTGGGGGCAGTTTTGGTAGAAGCCATGGTTTGTTGAGGATGTTCTAGAATTATCTG
GGGACTGGTGATCTTGGTTAAGTACAGCAGTAGAGTACAGCTTTAACTTCGCACAAAGAATACACCGGCTGTTATTTGT
TGATATCTCAAAACGACACCACAAACTAAAACGAAGCAGACGTTAGTTAGAGAGTAGAGCAGTAGGCGTCAGAGACTTG
TTTACMAGTTAYYYTKTTATYACCC
>00192 2 reads, 1072 bases
CGAGAAGGCTAGAGCGAACGCTTTCTTCTGTTTATTTTTATCACCGGCGCCATCTTCAAGCTCATGTAAAAATTTCTGG
CATTTTTTCATCAGAATTTTTATGGCCTCAGAGACCAAGACATCAGGTGGTAGAATACCTGTAGACTCAACTGAAAATA
TAAAGTGGTCCCTAACTTTCTGCAGTAATACGCCATCTTTTAAGTCATCATGTCTGAAAACATTTCGGCTGCACGTGTC
CTGGCGGGCATTAGCGACCTTGGCCAGCTTTTTACCATCAGGTGCTTTCACTAACTCAATGACGCCAGGTGAAAAAMAT
TTCTGTAGCTTCTCCGCCTGGGCATCGTAGAATGGTCTCAGCAGACGGATCTCTGGTAGGAGTCTGTAGGAGGCGGTGG
CAACAGGAGAAAATTTTGCATGATCTTTACCGATACCCTTGACACAATGGAGTTCAAGGTCAAGCTCATGACCAGGTCT
CATGGTAGTTATCAATATGTCWTCATGAACTGGACGAATTCCCTTGCTCTTCAAATGTTCTTGCCCAGGCAGTGGAACC
CATTCCATGTCTTTTGTATAGACTTTGTGGTTTTTGTAGAGAACATCTGGATCAGTGGCATCAGAGACTGAAGAGTTCC
TTGTGCACTTAACTTTAAGTTTGAACTGAATCGTGTCCTCACTGGTTTGCTCTTCTGAATCTTTCTGTCTGTACTCAAA
CAACCGAGGGTCTGCTTTGATCGGGATCAGGCCCAGCCTATGGGCCAGAACTTCGTCTTGAATGATGGACGTATTGTTC
CAAATACTGACAGTTTCTATGGCCATAGTGGGAACCTCCGCCAGGAGAATCCTCCGGATAGCATTGGCTATGGCAGCAT
CAACACCAACCATGTCAAACTCCATGTCACACCCAGACAGACTGACCATGTCAATTTGAAAGGTCTCCTCAAATTTTTC
TTGACTMCAARAATCATCATAGCCATTATATGTGCCTGGAAAATCTGTGCTGTTTACATTATCGATGGTGTATTCAGTA
AGATTAACTTTTCTTCTCAAATCTTCGATGTGGCTCATATTTTTT
>00193 2 reads, 1316 bases
ACCACTTAGTATAACAAGTGAACTCACTGTCTTAGTAGATGATTTACTTGTATGTTCTTCAGAACAATTTATTAACTCA
GCTTTCTGTTTTTGTGATTTGAAAGAGTCCATACTTTCAGACTCTGTTGTTGTATGGGATGGCACCAAACAACTATTTG
AAATCAATATGTCACTGGAAGGAATAACCCTTGATCTATTATGAGATAATTGTAGATCAACTGTGCTGCCTGAGGTTGC
AGCTTGTGATAGTTTAGTGGGCTGGCTGAAATCGGTTGTCCATAAGGTATCTAGCATAGATGCCATTTTTTCTAAAAGA
TTGCTATTTCCAAACATGGGAGCACAGTTGTTAGGGCTCTTAGGCTGGATGTAGTCTAATCTAATTGAATGATCTTTCA
CTTTGGGGAAGCTGTTGCTTTTCGAAAGGCTATGAAAAGACTTAGTGGTGTGCCAACTTTCCACTGGTGATTGGAAGGG
TGGGCTTTTAGAATTATGAACTGGACCCGTAAATGGCATGCTGAAATTACGCTGGAAAACTGGTGACGCAAAATTTTTA
TTTAATGACATCTTAGGAGCTACAAATGACCCCAAGCTTCTTGATTTAGTTTTGTATTTGTTCGCATCAACTAAATTTG
AATCATTGTGATGATTAACAGATGAGATTTCACCTGTACTATCAAGACGAAGAAGTGCAGGCATTATTCTGGGATTTGA
TGACAACGGAACTTTAATTGTCTGTACTTTATTATCAGCTGACTGGGTCAAATTAGTTTGAACTAGGTGTAGCTTAAGT
TGCTCCTGTTGGTCACGTGTAGTTTCATAACCATTATTCATTAAAATAGGAGGGTAATCACTGTTTTTTCCATTACTGC
TTGCTTGTGTTCGCCATGGCCACAGTCCAAATAAGGCCTTCATTAATTGTTAATAATGAGCTTTAAAAGTTTTGAAACA
TAACAAATGCAGGGGAAGTTTGTTTTGAATAAATAAAAATGTAATCTAAATGGCCAATCGTTAATTCCGTCTGTTTGCT
CGATTTGTGAAACACTTGCTGTTGCTCTCGATGGCAATGGCGCTTGTTTAGTTGCTTCTTTTCTTGACGACAATATCGA
AAGCCGGCGTTAGTTTCACTAGTAAAATTATTAGGTAGGAGGTAGGAAGGTTCAGAATTGTGAACAATTTTATTGATTA
AAGTAAACAATATCGATGACTCCATAATAAAAATTGTATGTCAGAAATCGTTGTATGTTTGATGAATGTTCATGAAAAG
ACTAGTGAATGTATCCATGTTAGTTCGATAAAAYCCTGTTATCCCTATTTTT
>00194 4 reads, 969 bases
AAAAAAATATGTTTTATTTTGASSWWTATWAGCTGACGTGATAAATCTAAAATACATAAACASSTCATTCCACMGAGTT
CATTGACACCACAGGTCATGAGATCAGTGGACCAGCTATTAACTATCTCTTATCTCTAGGATTCTGTTTGGCTGTTGAG
TGAACTCTCACCTTTAAGGCGTAAATATTCTTGTATTCTCAAGCGATGACGCTGCTCCTGGCTCATGCCTAGTGTTCTC
AAGAMCTGGCAGGTGACATAACCCCCRAMAGCACCAGCTACAGCTCCTATTAGTTGTGAGTTTAGCTATATGTCTTAAA
CCATTTCCTACACCTGTAAGGCCAAAACCTAAACCTGTGGCTATGCTGTACTCCAAGGGAGATGATTTGTTTCTGTATG
CAGCGATCGCTTGGGACAAATGCAGGGTTGTAGCTGCAAAGACAGACAATTTAGCTGTAGACTTCAGGGATGCTTTCAA
AATATCTTTCAGGTATCTGCGGTCCAACAAAACAGATTTAGCTGCTGAAAAATTTGCCTTGGCATTTTCATTTGCTTGA
GAAACAGAAGTCAAAACATTGACAATGGCCCCAACATAAATTGTTCTATGCAGCATCAAATTGACTGTTTGGACATCTT
CTTGAAGAAATCCAGAGCTGGATAGGGAGTAGAGTATTTGTAGTCTCTGGAGGCCTGTTTCTTGCTCTGCCGCCTGAGT
TATGCCCACTTCACTGTTGAGAATTTTCTTGTTCCTGTTAGACGACTTAGCTCCAACACCAGGTAGAGTATCTTCTTCG
AGTCCATCTGAATGGATGGACTGGTCATTTGATGTTTTCAGACCATGCAAATCATGGTATGGATGAGAGGAGCATTTTG
CAGTGCAGAGAAGATTTGTTGTGGCCATCTCAAAGTGTCCAAACAAAAGTTTTATAACCAAAAGTGATTAAAGACTTTT
TGTGACTTGACTATGTGTTTC
>00195 6 reads, 1123 bases
AAAAAAAAAAAAAAAAAACCAAATAAAASWGCTCTCCTTGTGTAAGGCTTGCACTCGGGGAAGATTTAGTGAGTAGATG
AGGTGGAAAAATTTGAAAAAATTAWWACGATGATAAATGCTTTATCACTGAATAATGGAGGACGAATCTTGCTAGGGGA
GACGACTATGGAACTTATGTCAGTGACTAAAGCAATGAGCCGTTGTTGCTGGGKAACGGGGTGCTGACAGGTTTACTGA
CCGTGTTCCAAGAGATTATTTTATTTTTTCTACTAAAGCCAATCATCACATGAAATGATTAGCCTCGTTGAAATAATCA
TTACACAATTCACCATCCCGCACGCAAGTCAAAGTTGATCTTTTCAAGTCAGCCTGCACACTGGATCACAGAATACCAA
GCCAGCATCTTCCAGCGGATGATCAATGTAGAATCCCCATATCTTGAATAAGGAAGAGGAACCAGTAAATTTGGAAGGA
GAGAATACTGGCTTAATGATGGCAGGACAGACTGTGACTCCGGGGCACCCCTGTGGGAGAGTTCTGAGGTGTGAGGGAA
CCACGGGCCGGCCGCAGCACACTGACCACTCCTACAGGGGGCACCAGGGAGTCTAAACTCTTTGTTGTCCCTGGGGGGT
TTAGGGAGTAAGGAGGTGGGGGACTATCACGGTCAAAAATGGTCCTGTTTGGAGGGGGACGGAAGACCCCATTCTCCTC
CTGCAAGTTTCGTGAAAACTGCTGTTTGGAGTGGAGTGACTTCTGTGCACTGGCATAGCCTTCCTCTCCATCTCCTGAC
ACAGGGATGTGAGGAGGGAAAAACTCATCAGGGCTAGTTTCTTTGTACGCAGATTTATTATGGGACCGTGGCTGGTGAA
CTTGCAGATTATGATGTTGTTGCTGATGTGGTGGTATCCGCCAAGATTTTGCCATCCTCGAATCGTCGACAGATGAGAC
ACCTTCTGTCGCCATGTTAGTTTGACAAAGACGCTGGTGGTGTTTCGGATGGTGGTGAGTTGGCTGTTGTTGATCTATA
ACTGGGGGTGCTTGAAGTAATCTGCGGCTTTCAGAGCCGTGAGGATTGGCGGCAGCGCTTGAACTCTGTCGCTGTGCAC
GATTACCCGTACCAAAG
>00196 17 reads, 1293 bases
GTGCTGCGAGAAGGCTAGAWARWKTTTCAMATGCCTTTGCTACAATTCTTCCTTTTCTAAATCCTCCTTGTTATTAGGA
ACATCAGTGACAGTGTCATCTTTAGGTATTTCAACACAAGAGCCATCTTTCATTTCATAGCCAACTTTGCAAACACATT
CATAACTGCCAGGTTTGTTCTTGCAAACGGTATTTTCACCCACACAAAGACTGGAGTCTGTTTCACACTCATTGATATC
CAAACACTGTTTGGTTTCATCATTTAAAGTGAACCCAGAGTTACATTCTTGACATTGAAATGATCCTGGACCAGTGCAT
GATAAGCATGCTTCATCACAAGTGAAACAGGTGTATGACCCTTGAGTATTCGTGCAATATTGGTTTTCTTCACAGGGAT
CTGACTCACACTCATTTATATCTTGACATCCAACATCTTCATTAGCCAGCCAACCAGTTTTACACTCATCACAGCCTTT
GGGTCCACTTTCCCAACATGTATTTTTACATGCAATGTGGCATACTTTGCACACAGTATGAGTATCATTCTTTGTCTCT
TCATAGAAGCCGTCTTTACATTGGTTGCATAAATCTCCCTGGTAACCTGAGGTGCACTGACACTTACCGCTTCCTTCCC
TTGTACCCTCACCAAGACATTTTCCATTGCCACTGCATGGTAGATCAATACCTCCAGGACACTGAGAACAGTCAGGGCC
ATATGTATTGTTAGGGCAACAAGCTTGTACATGATCAATACAAAAGTAATTGTACAAATCAGTATCTTTCTTTTGAGCC
AATTCTTGAAACCAGTATTTTTCCACCAGTTCTTCATATTCTTCTAATACTGAATGACACTCTTTAGAACTGTCATCAC
AAATATGTTCCAAAATTTCAACCAGCCGAACTTCACTTGTTGCATAAGAGCCCAAAGCTTTTTCTTCCCATTTAGTGTT
TCCTCCACCAAAATTTGACTTTGCTGTTGAAACCAGTCCCTTTTGAAAATTCAGGACAATTTCTGTGCATGCGCTGCAT
TTAGGCTTGTTCTTCCCATCAACCATTGATAATGTGGTACAGACTATCCATAAAAATAATACCATTTTTCTAATATTAA
GAACACATATATTCTGAGCATCTTGGGGAAATTTCATTTCAGATTTCCTGTTCTCTAATTTTTAAGTCTGATATACCAG
TAGACTCTTAAAGTTTTTAGTCACCCTTTTGAAACTTTCAGGCACTTGTTGAATCAGCAAAACTTGAAATTCTTCCTGA
TGTCTTCATGCATATCTGTTCAATTTGTG
>00197 2 reads, 1015 bases
TTTTTTTTTTTTATCCCTTTTTTCCCATTMKMKTSCGCTCACAGAAAGTGTTTTAGTTGGACGTAATAGACCAGCAGAA
CCTGAGTGGTAAAACATGAGAGCCGTCTTGTTCGTCCCTATCATAGCCCTCTTGGTATGTGCCATTGGTGTGCAGTCCA
AAAAGAAAGGTGATGATAAACAGGGAGCAGGTTCGCCGGCTGGACAGTTGCCAAACATGGGAACAGATCGCAGACCAAA
TCCCTGTTTCCGGAAAAAGTGCCAGCGCGGTGAAGAGTGTGTCTTAGACAAGAACAGTAACAGCAAGTGTGTCTGTACA
CTTGAGTGTGACCCCAGGGTGGTCAGGGAGGAGAGGCTCCAGGTGTGTAGCAACAAGAATGTAACCTACCAGTCTGAGT
GTCATCTAGACCAGGACCACTGTCTATGTAGGACAAATGACCGGAAGTGCTCTAGTCCAGGGACCTCCAAGATTCTGTT
GGAATACTATGGCGCCTGTAAAGAAATAACTCCTTGTCCTGAAAATGAAATGAAACAATTTCCTTACCGCATGAGAGAG
TGGCTTTTTATTGTCATGGAAGAGATGGCAAGGCGAGCAGCCATTGGAGAGTACGAGAAACTTCTCAAAGAGGCAGCCA
ATGATAAAAGCCACGCTTACGCCGCCATTTGGAAGTTCTGTGACCTTGACACTGACCCACAAGACAGGCTAGTGAGCAG
GCGTGAACTCCTCTACACTATCAGAACTCTCAAAGCCATGGAACATTGTCTCGTACCTTTTCTAGACAAGTGTGACGTC
AACAATGACAGGGAGATCACTCTGCTGGAATGGGGCAGATGTCTAGACTTGGAAGATGGCAAGATAGCCGATAAATGCA
TCTCCATCCAAAAACATAGAAAGTCTAATAAATGAGCCAAGTGATCGGTCAAATATAAAAGATAGAGGCGCCACATCTA
ACGTCCTGCTGCTGCTGAGTGGTCCCCCTTGCTTGCCAAGCCTCAACTGYGCAKATCGGAAGAGCGG
>00198 2 reads, 1181 bases
TTTTTTTGGTTGTGGGGGGGGGGGGGGGGGGGYCAKTRACYSSAGGTCCAGTACACTAGAATAATTCAACAATGACATC
ATGAAGTAAGGTGGGAGTTTACATGTCCTATTCCATCACATGTTAGAATACATTTGTTCTTGTCCAGCGCTTCAACAGT
AAACTCCGCCTTGGTCATGAGCCTGGCTATATGAATAGCTGTCTGTGAATGTAAGGTAAGGTGACTACACAGAACTTTA
GTTTGGCCTTTAGCCAACGCCATCAATAGAATAAGCTGGTCTTGTAAATGCTGATCGACGCAGCCTCCATTATGGACAG
CCTCAGCAAGTTCCCTGACAGCAGCAGCACCTGTCTCCTCCGCTGGTGATCTTGGCTTTCCTAGTGCTGAGCCACCCAA
CAAACAGCCGGTACTTGTCTCAGCGACAACTATTGTCCCCAGTCCAGAACCCTTGGAAGCTTCGCTGGGTTCCTTCAAA
CTGTCCTGCTCCAACACAACTTTGGGGAAATTCTGCTCCACAGCTTTACTGATACTCTGGGACACTTTGTTGGCAAGGT
GTTCCGGAAGGTTTCCAGCTACAAATGACCGGCTGTAAATCTTGACCACATCACCCCGCTGTGAAAGCGCCTCACTGAC
ACCAACAAGGTTGGAGGTGCAATGGATGGTGACCAGAACTTCACCACCACCTTGAGGGTAATAACCTCTTCTCTTGATG
TCTACTTCAAAATGCATGCCAAATTTTTCAGCAATTGGTTTGAATATCATTGTAGTGTAGTCAATCTGCGGAGCCAATT
CACAGTTTGTTCCTCCTTTTAGCTGCAATGTACTGTCAGCGGGTGCAAACAACAGGCAGGGGACAGCAGCCTGCATCAA
CAAACATATGCTCCCTGCTGTCTTGGTGTCTGCGACATATTTACAAGCTTTGATAGGACCAGGATCCAATGTGATTTCA
AAGGAACCTATAGCACACTTGTCRAGTTTGCCACCACAAAGGGAGGCTATCAAGTTCAGTCCCGTCATATGCTGAGGTC
TTAAACCTGGTTTCCCCCTGCCAGCACGGATGTTTTTCACTCTGATGGGAATGCCCAGGATGCATGATAGAGAAGCAGC
ATTGCGTAGAATTTGACCACCCCCTTCCAAAACACTTCCATCTATGATGAGAAAAAAAAAAAAAAAAAAAAAAAA
>00199 2 reads, 1014 bases
CGACTTGGCGAGMCCAGAGMTAGWGTTGTGCSWTCTTAAGGTGAAGATCATGAAGAGCATCGTACTTTTTCTCGTGTTA
ATTGCCCTGGGGCCTATGACATGTGACAGCACAAAATGCGGCAATATTATGTGCACCCTTATGTCTTTGAAAGAATCGA
AATGTCTGAAACACGCCTTGCAGATTTGCTCCCATATTTTCTACCAACCAACGCAACATGATATTACTCAGGAAATAAA
ATACGTGAGAAAGGAGAAAATTAAGCTTAAGCTTATCATGAGCATTCCCAGTAACGAGTATTCAGAAATAGCGTCATCG
CTTGTATTCACCAACTCTTTCCTTGAGGACGCCGTGAGGACTGCCAGGAAATATGACTTTGACGGAATATTCATCCTTT
GGATATGGCCTAAGCCGGAGGAGTCAGATAAATATCATAACTTTTTACGGAATGCAATGAACTGGCTGGATACTGAATC
CAGGACGACTGGCAGGACGAGGTTATTATTGTTTCACGTCCTGGGCCCTGGGTACATCTTAAACAACTATTACCTCGAC
GAAATCTCCAGGTTTGTCGACTACAGTGTACTATTTAACACCGGATGGGCGGGACCGTGGAACGAGGTGACGGGTCATA
ACTCTCCCATCAGTTACATGAAATCGGACATAGAATACATCATTAACCAGCAGCCACCCATCGCAAAAACTCATTAAAC
TAYCAGCCCATCCACGGGCGATCTTTTGAATTAGCTGAAGATGCCTACCCAGTTGTGGGGGCTCCTGTTGTTGGGGAAG
GCGTCTCGCCGTTGCAAGGCACATCACCCACGGTGAACCATGTAAGCGGCGAGGCGTACTACGAGCTGTGTCATCTGAA
GCAACTCTCGGAAGCGCAAGTGGAAGACAATGATGAACGTGGTCCGTATCTTTATAAAGAAAGATTCTGGCTTGCTTAT
TGAAGATCGAAAAGACTATGTCGCAGAAGACAAGGGCGGCTGTGGGGTACAATCTCGGAGGTGGTC
>00200 12 reads, 1238 bases
AAAAAAAAATAGGGATAACAGGGTAATATTARTYRACCTGKAYATMTAGATTWGTGTACATGTGGCTAATGTGTTGTTA
TTCTTCAGTTCTCCACACAATGGAAACTACTATTTTAACAGCCAAAATTAGATGCCTGCTGATCTGCCTTTATTTCAGT
GTGTTTTGTGCCACGGTGACGACCTCAGACAGTGCTGGTGAAACTGTTGTCAGCAGCAGATGTGAGCCAGTCCGGGTCC
CCATGTGCCAGGGCCTGGTTCCGTACAACGCCACCAAACTGCCCAATAAGTTTGGGCACACGAGTCAGAGTCAAGTCTA
CTGGGCTCTACAGCCATGGTGGCCGTTTATTGACGCCGGCTGCTCTGACAATCTGAGGAACTTCCTCTGCAGCCTTTAT
CTGCCAAAATGTGTTGGAGATGACCAGGAGCCCCACTACCCCTGCGTGGAAACGTGCAAGAAAGCCAAAGTGAAGTGTA
AGAAACTAATGAGACTGCAGAACACAAAGTGGAGTAAAGACTTCAAGTGTGCCAAGCTGCTTCCCAAGGACTCCCATAG
GTGCATCAAACCAGAAAGAGAAGGCAAAAAGAAACAAAACAAGGAGCAAGTTTTATGCCAGAGAAACACTCTGCCCATG
TGTAAGGGTATACCGTTCCAGATGGGCTCTCTTCCAAACATATTTTTGCAGGGAGATCCTAATGAGATAGCACAAGAAA
TGAGACAGTACCAATCACTGTTGGATAGTGGCTGCTCCAAGAAGTTACAGGTATTCCTGTGCGGTGTTTACATGCCCTA
CTGTCTGGACGGTCAGCCCAGCCAGACTGATGTTAGCCGTGAACACAAGCACCTGATCAACAAAATACCTCTTGTGCTG
CCATGCAAAGAGTTGTGTCAGGAAGTTTATGATCAATGTAGCGGAGAATATCAACAAAGGACTCATGGTCTACCCTGGC
CAGCCAAATTCCACTGTCACAGGTTCTCTGCATACGCAGACCACCACCCTGGTAACAGAACCACCACTSCTCCAAGCTA
CAATGATGAGAGGGGGCCTGAAGTCCCTTGCACTATGCCGCCCTTCAACATGAAGGGAAACTAACGCCCTCATCACATG
CCTGTTAAAGAATTCTTCATAACTTTTAAACTCTTTTGCTAGCGACATATATGAAATTGATTTGTCATGACTTTTTTTC
TTTTTACCATGTACTTCYCAWCTTAAGMAGAAAAWAAAAAAAAAAAAAAAAAA
>00201 6 reads, 1131 bases
CGTTGAGATACAAGTMRTSSCCAGGCACAGGACCCCATCCCCCCTTTTTTATGAATGGCCACCAGATGTCTCCACTCAT
ATTTGGAGACCTGCCTCCCCTTCGTAATCCCGGCCACCATCCTGGAGGTCATCACCTCTTTCCAGGTTTTCCACATTTC
CCTCCGCATGGTGCCCCTGGATTTCCAAGTGCTTCTGGCTTCTCCCCTCTGTCTGGCCTCTCTCACAACTCATCTTCTT
CCTCCACGCCAACCTCCCAGAACAACCTCCCTCCTCATCTACTCCATGGGTCCATGCCACACATGTCCCAGTCACCTCT
TCCACTCCTGCAACACCAGCAGATCAAGAAAGAACCGCACACATCTCTAATAGCTCAGACAACAACAACAAAGTCTCCT
AGTCGAAGTCATTCAGACGAAGCTATCGACCTACGCAAAAAATCTCCCCCACTGGAGAGCAGGGAGCCCCCACACGCCC
ATGATTTAAGTTCCTGCGGGGGCAAAGAAAACTGTGCTCATGCTGCCAAGCTAAAATATCTTCGACTCAACGTTGTGAG
AATGTTGGGGATTCTTGTTCCCAACTTGAACTTTGCTGAAAAAGGAATCAGTGCCGAATCAGAGTCCGTGGACGAGCTT
CTGCAGGATGTTATAGAGAGCAACACCCATGACGATGATATGGAGTGAATCTTTTATTTTGGAGATTTGGTTCCTCCTT
GAAGCCAGCTTTAAGTGAATTGAATCTCAGCATATACTGAGTGGATAAACTGGCAATTTTTTTTTTTTAAAGTATTGAA
AGTGGGGGCAAATACTCCAACAGTAAAACTGAAGATGGCACAAAGGCTTTATGAAATGGCACAGTAACCATTGATTAAA
TTGCCTCATAAATCGGGAGCTGGAGAAAGTGTAACTTCTTGAAACTTGTGCAGGTTCTAGCTTTGATTCACTTTTTGAT
CAACTTTACTTTGTGTTTGGCTGTGAAAATTTTGTGCTAGACTCACYTAAGAAGATGAAAACCTGAAAAAATAGTTATG
TTTCTTGAAACAGTGATGCAATTATGCAAAGTGACCTAGAAGACTCKGAAGTAGCGGTTCMCACTGTTAATGTACCCTT
GTTTTATAGACCGAAAAATTTTGTT
>00202 4 reads, 1196 bases
AGTTGGCAGCGGTTTTCATACTCTATGAAATGTATAAGACTGATCCAGTTTCAGCGAATCCATTTGCAGCTGTGTTTTT
AAATCTTTTGCAAGAGAGTCCAGAAAGAAAAGAATCCAACCCTTATGATCTTCAATCTTCCATTCCTCCTGTGTCAGCA
GCAGAGAGATACTTTCTTTCTAACCTTATTTCAAGTACTTCCAAAGAGCTGTTAAAAAAAAACGCCGGCACAAATTATC
CAAATGGATGTGACAGGCAAGCAGCCAATGGATATCAGTCAGACCCAATTGTTCATTGTCCAAAGACAATCAGAAATGC
CACATACAAGCAAAACTGCAATGAGTTGTGTGTTAGCTGATCCTGAAACCAAACCGAGCAGCTTTGAACAATTTGGAAA
ACCCAATATGATTAATCCAGACATTCAGAGAGATGTAGCTGAAACTTTACTCACGGGAAATAAATGTGCTGTTGACAGC
ACACTACGACCTGAGTTTATCAGACTTGCCCCTCCCTTGCATATAGCTGATGATGAGATGGCATGGATGCTACCCACAG
ACAATGAGTTTAATATAGCATGGGACACAACTATGTGTGTAAATACATCTACTGGAGTTGAAGTCAGACGTTTAATGGC
CAAAGCTTTCAAAGGCGCATTATCTCCCCCACAACAGCAGCAGATAAAAAAAGAGCTGGACAAAGACAGCAAACTTGTC
TTTAATATTGGTCTATCACCAGCTAAACTACCAGACCTTGTTGAAAATAATCCACTAGTTGCTATTGAAGTTCTGCTCA
AATTGATGAATTCAACACAGATTACAGACTACTTTCAAGTTCTAGTCAATATGGAAATGTCTCTGCATTCAATGGAGGT
AGTCAACAGACTGACAACACAAGTGGAACTTCCATCCGAGTTTATACATTTGTATATTTCTAACTGCATAACAACTTGT
GAAACAATAAAAGACAGATATTTTCAGAACAGATTAGTCCGCCTCACATGTGTTTTTCTTCAGTCTCTTATAAGAAATC
GAACTATAGATGTCAAGGATATTTTTATTGAAGTTCAGGCATTTTGCATAGAATTTAGTCGCATACGTGAGGCTGCAGC
TTTGTTTCGACTACTGAAATCACTGGATAATGAAAAAGAGCCATCCAGCGCAGGGCKATATACAATTCTCTAGCCTTCT
CGCCAAGTCGT
>00203 10 reads, 1192 bases
AAAATAATATTTCTAAGTAGWWWATAATTRACTTTTTCAAAAATATACTTTCGTCTTGTATAAATTACGACCAGGCAGG
TCCACGTGTTGGTGAATGCGATGGAGAGTAACGTCAACAGGGAAAGCAGTCCTTTAGACATGATGAGTCCACCGGTTTC
GCTTCTTGGTATCGTTCCAGGAGGAGCGTAACCGATGCTGTAAGTTCGGTTTATAACACGCCTACAGGAACCGGTCGTC
TCGTTGACCACTATCTGCAACCACCGGGACACGTTCTGGGAAGTGCCCGGTCTCACGTCATCCTGCACGCACGACCCGT
TCGACCGAATCACTTTCTGGTCGACCAACATCACGACCAGGCGGTCTTGGACCTTCGTGACGCAGTATTTGACGTGGGT
GACGCCCCCCGGAGAGATGAACAGCTGCTGTGAGCTGACGTTGTACTTGAAGTCGTTCACGTACAGCGTCTCTTCCTCT
GTGGCCACGACAAACGGAGACTCTAATCGCCACCGCCCCTCCAACACCAGCGACCTGCCGCGCCATCTACCGGCGACCG
TCGAGCCGTTAAGTCTGGGGTCGGCCCGTACGCCGATGTACACGAAGAGGTCTGGTTTGATCAGCTGGCAATGTGAGTA
CTCGTGGAGGCTGTCAAAGTCAAACGGCAAACCTTTGCATTCGGAGACGGGAACTTCTATGAGCAAGTTCTTATAGGCG
TACGTGTGTCCGAAGGAGTAGTAGATCCCAAAGAACAAGATGTTGTCCCTCGCCACGTCGTGCAGGTCAACAGTGGCGA
CAAACGAGACGATGTCCAGCAGGTTCCTGACGACCCCCATCTCCCTGCAGCCTCCCCTCTCCACGGTCACTTCAAAGTG
GGTGAATCTGGGGGACGTGGCTCCGTGGTGGACGTATGACGGGACGAAGTTCAGTGTTCAGTAAGGACGTTCGACAGCA
GACAGAAAACCTTGATGATGCAACAGGCCGCGAGAACGGTAAAACAACACAGTAATTTAGACGACATTCCGTTCAACAT
CGATGCCAAGTTCCAGCTCAAGTTTGCCAAGTTCTGCCCTAATCACAAGCACAACAAAAGCCTTATCGCTAATGAACGA
TTGTTGCAAAACTAGTTGGCTAGTTAACGTTGACATTTAGACTCAGACAGTCAGACACTTTTGAAATTGAGCTTTGGTA
TCAATCT
>00204 16 reads, 1203 bases
GATTAAAGACAAAGAGGAAAGTAAAGTAAAGCCTCACTCCACCAGACTCTTCTTGTCTTGTTAAAAGAAAAATAAATCT
TCGCTTACTAATGTGGTCTCTTTGCAAATGATGATCCATGGAAGCTTGTTTTTGGCTGCATCTTAAATTGTTTCTGAAA
TTAGCCAGGCAAATGTCATTGAACTGCACAAGAACTGTTGGTGAAGTGTTGAATGCAGTCACGTGATGCCCAATGTTGT
TAGCTGCGCGTTTTTCGTATCTTGGATTTTTTTTTTTTTAAATCTTGGAACATGAAATTCTTTGAATGGCCTTTGGTAT
CTTGGATTTTCCGTATCTTAAAACATTCGTTTACTCGAGGTATAGCTGTATATTGCTTTTAAGGTTGCAAGTCGTCACA
TTCAAGGGGCGAAGAAAAGTTATTTGTTAAATTTTTGAACAATCGTGGATATTTTCGTTTTAGTCAAAGTTTTTATAGT
TCTATTTCTCTATGTCATGACATCGAGGATATTAAAAAATAGCGTCAACAAAAAACTTTATAAAAATTAACTTGATATT
TTAATTACAAACATCGGGTTGGGCATTGCAGGAACTAAGGTGTGACGCTAAGCTATGAAGAGGTAATAATTATGATATG
ATCAATGGTGGGACGACTCTTGAAGCACCAAAATATGTTAGTTTTCGTCATCGTCGCTGAAGTCATCGTCCGAACATTT
CTTTGATTTAATGAAGCTCTGGATTTGGCCTTCATAGACAAAGTTCTTGACCTTCTCAATGTTAATAGTTGTTCTGCAT
CTATCCATGTCGGCTTTCGCTTGGTCTTTACTGTCTATAAAACTTGGAGTGCCAATAGGGCTGTAGAAGTTTATCTTCT
TTTCCACTTCAACCCCGGACGTATCAGAAGCTTGAATGTCAAAATCATCGAAAGGTGTTCCATCGTTCTCTTGGTCCTG
TGCATCACTCGAGACTCCCTCACAAAGCAGATTACTCAAATCCACAGAACCACGTTGATCAGCGGCACAAATGGCCCTC
TCCCTTTCCTCGTCATTTGGCTGCTTGTGCTTTAAAAGGGCCCTGACCACCGGCACACTGCCGCTTTGAACTGCCAAAA
ACAGTGCGAAGTCACCGGTTTTGTTTCTGATATTGATGTCCGCACCGGCGGCCAAAAGGGATTTGACGATGACGTGAGC
GACCATACCTTGTGTACT
>00205 27 reads, 1368 bases
CCCATTAGTTGTGGACCGAAATRSYWWWMKAACTATCCGATGGTCACTGTCACACCGTCCGAGATGTCTTTGAAATCAG
TCAATGTATCGCAGACGAGATTCCTGGAAAGTAAAACAGCTAAGGACACCGTAGAAAAMTTGTCCCGATTTAACTACAC
GTGGTTCATACCTCTGACTTTCACGACTAGCGTGGAACCAAACTTCAATCCTGATAATATGAATATTTACTGGTTGAAA
CAAGAAGAAGATTCCATACGCCTCAAAGGAAAAGATTACATTTGTTCCTGTGGATGGTACATCGCCAACGTCCATCAGA
TCGGTTATTATAGAGTCAACTATCCTGTCACCAACTGGGTACATCTAGCTGAACAGATGAAAAGAGACCACAAGGTAAT
TGGAACCATCAACAGAGCTCAGCTAATTGATGACGCCTTTAACATAGCCAAAGCGGGACATATAGAACTTGATATTCCA
TTTAAAGTGATTGAATACTTGGAAAAGGAGCAAGAATTTGCGCCGTGGCATGCAGCTATAGCAGAACTGAATGTAATTC
TGAGGTCTCTAACTCACACAGAGCTGGAGATTCCATTCAAGAACTTTCTACAGGCCAAGATTAGACCTACTTTTMTGAG
AATTGGCTTAAATGGCACAAAATCCTCTTATATGGAAAGAAAAATGCGACATTTAATTGGAGTGTTTGCATATTCGATT
GGACTAGAGGAAGCTGTGAACCAAGCTAAGCAGCAMTTTGAACTTTGGATGAAGAACCAAACCACGTTTGTCATAGACG
TTAATATCAAAAGTACCGTTTTTTGTGCTGGCATAGAGCATGGTGGACGAAGTGCTTGGCTTAATGTTACTGAGATGAT
AGCCAATAAGCATAAGGAAACGGAAGAGCTGAAAAAGGCTTTGAGCTGTAGCAAACATTTTGAACAGCTGTCGAGCATC
CTCAATGAAATAGTAGAGGAGAACAGTACGGTGCCTGGCGGTGAAATCTATTACACCATCGGGCGTGCGATCAAAGCAA
ACTCATTGAGCCAAAGCCTGGCCTGGTTGTTTTTTAGGGCTAATTATGCAACACTCCTTAAGAGGGATTCTCTTATATC
GCRCACCATTYCAGWAATCACCKCATCYCTTAAAACAAAGCAAGAACTGCAAGAACTTGAACAATTCATTAAACTCAAC
AAAGAGAACTTGGGCGAAGGCGAGACTCATTTGATTAAAGCTGTTGAAGATGTCAAGGGGAAAGTAGCATGGATGAAAG
AAAATTTTCCCAAATTTAAAAAGTATCTTGAACGAAAAGGATTTATTAAAACCTAAATATTAATGGGATTTAATAAGTG
CATGTTTAATGAAGTTAAACTAGGT
>00206 11 reads, 1087 bases
GGTTCATTTACAAACATGTGTACRSATGCTACAAGTAAATGTTTGTACACATGCCTACCAGCTCAGCTTTTCATTCAAA
ATCAATGCTTCTGTAGATGTTTTAAACAGTGAAAATAAATAAAATGATATTGATTTAACAAGTTATAAATTTACTCAAG
TAAATTTTAAAAAAACTTGTCTTTTAATTCTTTAATCTTACACAACATTTATCCAACTGCGTTGCTTATCAGAATAATT
TTTGCATCCACATTATGCAGCGTTTGCTTACTGGCAAAAAATGACCACGGAGCCACGGGCAGTTAACATGACTCAACAA
AATGAAATCACTTTATTTTATATTGCGAGCAATCCTCCGACAATATCCCGACTTCATTTCTTGCAAAGCTTCCTCCAAG
ACCCTAGTGATGTGCACCAGGTTGACTGGGTCGGTTTGGAGCATCTTGACCTCCTTCTTGTCCCCATCCATTGTCTGCA
GTTTCATCAGTATGGAAGGACTCACTTGATGACGTAAAGATCTACTTGCAAGCTGAACATCAAATCTCCACTCAAGATT
GTGGTAGTGGGGGAGCTCCAAACTCATTTCATTTAAAATATCTCTGATTTCTCTACGGTGCTCTAAATAAAGTTCCAGT
AATGAAGCTCTTGTCTCGTCTCCAAATCCCAATGTCATAATGGAGTCTTGAAAGTCAATCTCATTTAACAAATATTTTG
AACTTTCAGTCAAGAGATACATCAGAGCCTCTACCCCATGCTGGACTGTGTCTACTGGCACTCCCAGCTTTTGGGCAGC
TCCTTGGAAAATTTTTGTGTTAGCTCCTTTTCGAATAAAATTCAAAGCAAGTCTGCCAAATTCTTTTAAAACTTCGGCA
TCTAAATCTGCTAAGAAAGATAAGTGATCTTTTTGTGAATCTTCAAAGATAAGTAACATGGTGTTATTTCGTTGTTTAT
AAGACAACTGTGTTTTTAGTTATAATGTAAGGGCATTTATTTTCTGGCAAACATATAGTATAAAATTCAGAATGTGAAC
GCAGCCCCCCATGTATTGAATGTTACTTCTGTTCAGCCTTAAAATAAGTAGGCGTTACCC
>00207 8 reads, 997 bases
CCCATTAGATGAACTTTGCTAATTWCAAGTTATAGTTATTACTAGTAGTTTAAGTTTAACTATATACGGAGGCTTCTAT
AAAAACTATAACTCTTTAGGCATAGGATCAAAGCCCATTTTTCTGTTTTATTTAATTTGTTCAAAATAAAAGGCAGAAG
CTATAAGTATAGGAATAGAATAACTYCAGCAGAATACATATCAGTGCACCATCAGTGGGAAAATTGTGTTTTGAGACTT
TTTAAAAAACAATTGGACATGATGCCAGTGACAGGTGAATTTGATGAGGAGTTTTCAGAAGGCCATATTGATTATCGAC
AAAAGTACAAAGCTTTGAAAAAGAAACTAAGGCTGCTGGTTTATGAACAAGAATGCTTTCTTGGTGAACTGAGGAAGGC
TCAAAGAAAACTATTAAAGGTTTCTAGAGATCGTAGCTTTCTGCTAGATCGATTGTTACAGCAAGAAAAGATTGAAGAT
TCATCTGGAGAATCTGATGCAACAAATTCAACAGACACAGAAGATGGTGCTCATCACAGAGAAGCTGGTCCTACAAAAA
AGCGCAAACTTGGAAGTCAGCCAACATCTGCTGCAGATTTAGCACACATTCTCTCCAGTTCAGCAAAACACAATTCGGC
AGGGGGTGAATCTCATGTACAGCAAGAAAAAGAGCAAAGGTTCTGGCAAAAAGAGTAGTAAAGCAAACAATCAGAAGTC
TACAGCAGTTAAGCTTGAATCTCCTGGCCAAATGACTAGAGAAGAACTAGARCGCCACCTGGAATCCAAACGTCATGAA
TTTGGCATAGAGAAGGCCACTGCCTCCTTGCCTATGGAAATTTTCAGCAATGATCCAAATCAAGAAAGTGACCCTGGAG
CTGATGGTGGAGAGGAAGATGAAGATGACCTCGTCATAGATGTACCACATTAAACTCATTCATGTTAATGTTTTTTCTT
GTAGAATATCAAATTCATGTTTTTTTATATTACACATTTTTATATCAAC
>00208 2 reads, 1075 bases
GACCGATGTCTTGACCAATAGTGTACAAAATGCCTGTAGTGAAGCAAGAGAGGAAGGATCGATCGAACAGTGAAGTTGA
GATACCCCCAGCCTCCAGTTCTTTTACCTACGTATTTGATGGAGACTATGAGCACTCARRRTAWTCGTCAMCCATTAAA
GCTGCCATGGAAAGACACAAGAAAGCTTACAAAGCAGGGTGGCTAACCACACCTAATGCTTACAAAAAGACAGAAGTTG
AAGAAATAGGCACAACAACTCCTAAGAAGATAACTAAGTGGGTACCAGAGGGTGACTCACCAAATAGGCCAGGTGGGAC
ACCTATCAAAGTAGAACATCCTAATCAATTTGCTCCACAAGGAGACAATCCTAGAGAATTCAAGCAGAAGCAGAAGAGT
ATTAAGAAGGATTATTATGAAGAAAAAGTTACTGCTGGCCCACAGTCAAAGATCTTGGAAGGTATTTCTTGGGACGAAG
CTCAAAGAGCTAAGGATGGTCAATTAAGTGGAGCAGGGGATCAACTCATTGTTGTTGGAGCCGCATCAAAGGGCATCAT
TCAGAGGGACCATCAACACAATGCTGTTGTCTATCGTCAATACTATGCAGCCAACCCTTTTGAAAACATGACAGAAGCA
GAGATTGAACAGTATCAAGCAGAGGTTCAAAGAAGAGAGAGAGGCGAACCAGAAGAACCCACACCAGAAATTTCAAATG
CAGTACCCACATCCCAACAGCCACCAGAAGCTGAAAAACCACGTGCAGCTGAACCTCCCCGTGAAGTGGAGAGACCAAA
AGAATCCCAGAGGGACACAGAAGTACGACGAAGTAGACCACAGGAAGACAATCAACAGATTGAGGGAAGCAGAAGCTCC
TCAACTTATCAAGAACCTACTAGTGTGAGTGTGAAAAGATCAGAWTCTGAGAGACAACCTAATAGAAACCAAGAACAAG
TTGTAGAGCAGGTGGAACGTAAAAACGTTGAAAGGTCAAAATCTGACCGTCGCCAACTGCAAAAAGAATTAGGTGATGC
MAAACCAGCATCTCCATCAAAGTCTGACACCATGCGGTCTACCGACAG
>00209 5 reads, 950 bases
GACTTCGTCTCGTTCTTGTTTATATGTGCATTAACTTTTTAGAAAAATTAACAATTCAAGCAATTTTTAAATTTTTCAA
TTTGCTCATTCTAGAAACATAGTGTTCATTTTAATATTTAACCAATCAAAATTTTTATTGACTGATAGTTACACGGTTA
TTCCAACTGTTCAACCGAAATATAGACGATCATTGGCCATAGGAAATACTGCAGTGTGCGCGAAAACGAAAGCCAAAAA
GATGAACAGGATGCCAATCATATACGATCTCCCACCGTGAATAATGGATCCTTGATTTCTTGACTCAAGCACCCACTTC
AGGCAAGAAGTATTACCGTATACATACGATACGTACTCCGAAGGACGACTTCTGTAAATCTTATGATGAAGGAAGCCTA
AACGGAAGTACCTCCAATGAAAGCGCCAATCCATCGTGACGTTACACATGATGCGGACTGTTTCACCGTCATTAGAAAG
GCAGCGGCACCGGTTCGGTGGCACTTCGTCTTGATGGTAGCAAGCGATCTCCTCCAAGGCCTGGTTTGTCCCGAACACC
CAGGCTAAAGATCCATGGAATAGATACAAAACGGCTACCGTACCATAGAGCGGCTTTTCAAGGTTGGTGATATTGATAT
GTCCAGTAAGAATAAAATAATCAAGATCGTGGACATAGCCGTCAGGACAACTTTTTCTCTTATAATCTATATGGTCCAA
GAAAACAATGGTATCCTTTGGTGTCGGTAAATTTCTAGTCGCCCCTGCCAATCCTTGTTTCCCGACCACAAATATTAAA
ACTGCAGCTACTAGAAACTCAGTAAGTTTCTGCATGGCTGGGAACAAATGTTCAGCCCAATTGTGTTTATCCGTTTTAG
GGGTGAAATTTTATAATAAAATATTGTGAGTCATCAATTTTTAAWTWGAAAYACATCCGAWACGGCTAAAGTTCTTTAC
GA
>00210 12 reads, 936 bases
CCGAAAAGGACGAACACCTCWWSWWSWSSWATTTACCTTAATCTGTTATAACTAGTTTACTTATTTATAGCTAAACCGG
GTTTGAGTGTGATCAAGATGGAGGTGATTTTGTCAAGGGCAGCACCTTTGCTGGTGCCACAATGTGGCCAAGCACAGGT
TCGTGGTATGGCAACTTTAAAAGAAATTCGCCTGCGTCTAAAGTCTGTCACCAATATTCAGAAAATTACTAAATCCATG
AAGATGGTTTCTGCAGCCAAATATGCGAAGGCAGAAAGAGAGTTAAAACCAGCTCGACAGTATGGTCATGGAGCTAAGG
CTTTTTACCAGAAAGCTGAAATCGCCCAGGACAAGACCAAAGCCAATCACTTAGTRGTAGTTATGTCTTCAGACAGAGG
TCTCTGTGGTGGCTATTCATTCATCTATTGTCAAACACATCAGGGCAAAAGTTGAAGAAGAAGGATCTGCAGTGGACAC
AAAATTTATCATTATTGGAGACAAAGCAAAAGGCATCCTTCAAAGGACCTTAGCCAAGAATATCTTGGTTAGTTTTAAT
GACTATGGAAAGAGACCTCCTACTTTTAGTGATGCTGCTCTGGTTGCCAATACACTCATACAATTTGGACTATAAATAT
GATAGGGCAACTACTTGTTTTCAATACTTTCAAGAGTGTCATTTCTTACATCACAACAGAGCTGCCACTGTACAATCCT
GATGCTATTCAAAGTGCAGAGAAGATTCATTTGTATGACAGCTTGGATGATGATGTTCTTAAAAGCTACAATGAGTTCT
CTTTAGCCAGTTTGGTTCTCTTTGCTATGAAGGAAGGAGCCTGCAGTGAACAGAGTTCTAGGATGACAGCTATGGATGC
TGCCAGCAAGAATGCTGGTGAAATGATTGGCAAACTGACATTGACATTCAACAGAACCCGTCAAGCT
>00211 8 reads, 1138 bases
AAAAAAAAAAAAAAAAAACTATGTCAATAATATTTACAAACAAACTGCAAGCGAAAACATTGGATTTAAAGTGATGGCG
AGAAGACCATATTGAAGTTATTCAACTCCATAGTCTGGTATGTTGAGAAGCTGTCATTGAGGTAGCCTTGAATGACTGT
CAAATAGAAGTTTTGCTCGTCAGATGTCAAGTTCCTAAAGGCATCGGTTTCCTCTAACTGCTCAATGAAGGCATTGAAG
GCAGACAGCTGGGCTGTTTGGAATCTGCTAAACCTCGAGGCCTGGTATTTGCTGAATGTGTCAGTGAAGATCAGACTGA
GCTCCTGATCGTAGTAGTCATTCAATGCATTTTCCTGGCTGTCGAACAAAGGCTGCATGGTCTCCCGTGAGCAGAGGGA
AATGTCGTATGAGCCAGAGGCCATCAGAGTGCTCATCTGTGCAATTTGCTGGCTCTGGAGATTAACCAAGTCATCGTAT
GCAGTGGAATAGAACGACTCAAGCGAGGCAACAATGCTCATAGACTGGGTGGTCACAATACAAACTGTCTCAACCACGA
CTTCCTCCTGTATAACCGTGTTGGTGGCAGTGACATAAGATTCATAGTCAACAGTGACGGTGGAGAGAGTAACAACAGT
TGAAGTAATGTCGTATGAGGAGCTGTCTGTAGAATAGCTTGTGATATCGACAACATAGCTTGAGGTGTAGTATGGGGTG
ACAAGAATCGAAACAGTGCAGTTTGGAATGATACAGGTTTCGCATGTGTTGTAGACACTGGTTGTGTACACAGTCTCCG
TTTCGGTGACATTCTGGGTGATGTAGTTGGTTACAACATAATCAACCTCGGAGGTGGATGTGTACAGATAGGTTGTGAA
CTCGGCATCGGAGTTGTACGATGTGTAGATGGAAGTTGATTCCTCAACAATGGTGACTGCAGGCAGTGTCGAAACAGAC
GTGTAGCAGACGACTGGGCAGCTCTCCTGGCCACCTACGTAGGTAATGACTTCATTTTGGTCATAGTTAGCTTCGCCAT
CAGCTCTCAGAGCTGGGCTTTCAGGTTTATAGTCATAGTTGATTTTCCTGTGCAATTTAGGATTTTCGACAACATTTGC
AAGAACTGTTAAAATGTATGCAAGCATATTAC
>00212 9 reads, 1067 bases
CTGACTGAACTTGTCAGACTTTAGGCTTGGGAATGGGGACGGATATAAAGCCCAGAATGCTGAAGGAGATGTCAGAGTG
TCGCTGGGCCTAGAGCAAAGTGAAACATTTGTGGAGATAAAGAAAAATTACTCCTCGCTGGTTTCCGATCTAGAAAGCG
TTTCAAAACGCTACGAGTTCATCATGAAAGAGTTTTCTGCCAACAAATGCGAGAATGGCCAACAGATGAATGTCTTAGA
GAAGCGCCTGAATGACCTGGAGAGCAAGGGGAGCAAAACTGAGATCAGGTCTGCAGACGTTGAGAACAAATTGTGCAGG
CTTGAAGACAGCCACAGCAAGATGGACCACAGAATCAACAGCCTGGAGAACAGGCAGAACAAGATGGACAACAGGCTGA
ACGAGACCGACACCAGGGTTTCTCAGTTTGAATTGAGGACGTGTGCCGTCATCGGCGAGAAGGAGGCTGAAATGAGAGA
CATCACAGACAGGCTCAGGCAGACGTGTCAAGACATTCTGGCCATCAAGCAGGTTACCAACGAGAGGAAAGAGATGGAC
TTGGCCAAGTTGGCAGAGATTGAGGACTGTGTTAAAAGCCTACAGAAGAACTGTGCAAAGCTTGACCTTGAGCAGAGGG
TGACAAAGCTGAGTGAGTGGTTTCAGAAGCTGGATGCGGAGAAGCGAAGTGACGCCAAGCACATAGAAGAGGTCACATC
TGTGCTTGATTCAATTCAAGCCACACAGGACAGTTTGAGTACAAGGCTTACTAAAGTTGAGGCTCAAGTGAAACCGAAA
TACTTATCTTTGGCACAGCAAGCTGCTTTGATGAAAGTTGGTGCAAGAGTGAAAAGAGGACCTCACTGGGTTCAAGGCA
ATTTTGATGGCTCACCTCCTGGTTTGGGTACAATTGTGCTTGAACTGGCACCTTACAACATGGTGAAAGTCAAGTGGGA
CTGCGGCAATGAAGACAACTACACCATTGGTGGCTACCAGAATAGATTTGAGCTACAGCTGGCCGATCAGCCCTAGGAT
ACTAAATTGGCCCTTGAAAAAAAAAAAAAAAAAATAGGGA
>00213 10 reads, 1179 bases
TTATTAAGTTCTACGCGTTGSWWWWCGMTATTGCTGGTCGTGACCTCAGCAGTGTTCGCTCAGATCGAGATTCCAGTCA
ACAAGGTCGACAACTCGGAGAAGATCCTGACCCTCGGCAAGCTGATGAAGTTCCTCAGCAACCCTAAGATCAGAAACGC
AGTCGGAGCCGAAGTCCCAATCGCTAACTATCTCGATGCCCAATACTACGGTCCAATCACCGTCGGAACTCCCGGACAG
AAATTCAAGGTCATCTTCGATACTGGAAGCAGCAACCTTTGGGTTCCTTCATACCAGTGCAAGTCGCTGGCCTGCCTGC
ACCTGAACAAGTACAACCCAACCCACTCTAGCACCTACCAGAAGGACGGCAGAACCATGGCCATCACCTACGGATCGGG
CACCGTCTCCGGACCTGTCGACATCGACACCGTCAACGTTGGTGGACTCAACGTCAACAAGGTTTACTTCGGTGAGATG
TACAACTTGTCCCTGAACTTCGCCACCGCCCAATTCGACGGTATTCTCGGTATGGCTTGGCAATCGATCTCGGTCTTGA
ACCTGCCTACTGTGTTCGACCTGATGTACAGCCAAGGCCTCATCACCACCAACTCTTTCTCTTTCTACCTGACTCAGAC
CCCAGACGCTATCGGCTCATCTCTGGTGCTCGGAGGTGTCAACAGCAACTACTACACCGGAACCTTCAGCTACTATCCG
CTGATCGCTGAGAACTACTGGATGATCAAGATCGCCTCAGTCACCGCCCAGGGTAAGACTCCAGTCTTCAAAGACTTCA
ACGGTATTGTCGACTCCGGAACCTCCGTCCTGGTTGGTTCTTCCAAGCTGGTCGATGTTCTGCTGGTCGAAATCGGAGC
CGCCGGAAACGTTGACTGCACCAAGATTAGCAGCCTGCCAAACCTGCTCTTCCAAATCGGAAATGACACCTACACTCTG
ACTCCTCAGATGTACATCCTGCAGGTGACCAGCCAACAAGGACAGACCCAGTGCGTTGTCGGAGTGACCCCGATCAACT
TCCCAGCCTCTTTCGGCACCACCCTGATCCTCGGTGACAGCTTCATCAAGACCTATTACACTCACTTCGACAAGGCCAA
CGAGCGCGTCGGTTTTGCCAAGGCCGTCCCTAAGTAACTAATCTTTCAGCACCGCATAGACCGCCARCACCGG
>00214 2 reads, 1101 bases
TCTTAATATAGAATAAACTATCAAAGGTTTSTAATTAAAAAATGGACTGGCTAAGAGAAAATAGGACTAGATTTCTGTA
AGTTTTTGCACTTGTTTTCCTAATGAGGATGCTGTTTATCGTGTGGTTGCCATTACGGACGATAACTGTATGATAACTG
AATGATGCAATCGAAGAAACCGCGGGAGACAATCCTTCATTGATCAGCAACCGTATTTGTTGGGCCTTCCCTTGACGCT
TGAGCAACAGCAGATTCTTTTTTGTTGTTGCCGTAGACCCCCGTCTTGTAAACTAGAAACATCTCTGACTTCAGCATGT
TTCAGACACAGCCCGTTAAACTCAACAGCGTTCATGTGTCGGCACCTCTCTTCGAGACTCCACGGTTTGTAGACACACA
GACTCCTGTAGTGAGTCCATCCCCGCGGACACACGCCAGAGTCGTCGAACTCACTATCCAGATCCACGTTTGAGTCCGA
CAATGTGGATACGGATGAGTCGTCCAGTAAGGCTGCTACTTTGCTATCAGTGTTGACGTCATCAGTGGGGGCCGATGGC
AGTCKCGGRTCGGTGTCATGAGGAGAGTCGCCTTCGGGGTTGTCTCCCATTAAAGAAAATCCTAGTGAAAGTTGAAGGT
CGTGACCTGTCTGAGAGTTAGCTGATTGGTCGACTGGAGCTCTTATTATGCAAAGACCTTTGATTCCGATCCCTCCAAA
ACCATCACAATATATGGCCACTGCCCTGTCCGAGGTCCCAATACCTCTTGTCACACAAAACCTCTCGTAATGGAGCCAA
TTTGTTGGGCATGGATTTTTTTCACTGTCCGTGTTGTCCTGGAGTGGTGATGCATATGAATGAACAGTGTACAAGGAGT
GAAGGGACAGTGATGTCATTATGAGGTGAACTAGTCCCTGTGCTGCAGCAGTGTATAGAGCCATTGTACAGAAGCCAAG
AGACACCAATAGCTGTAGAATATTCTGGAACTCTCTGCAATGTTTTATGTGGGCGGGATGGTGGGATTCCCTGGTAATC
TGTGAAGAACTACAGCGACACGTTTAGCGGTCTCAGAGGCGGCGTCTAATCTAAATGCACGCAGAAACCATAAA
>00215 2 reads, 805 bases
TAATCTGTATATAAAAAGGTCTTCATGGTTCTCTTGGGAATCCTCCAGGGATTCTTTAGGAATGCTTATTCTTTCATTT
TGATTCTGTTCAGTTTTGTTGAAAAGGCTGTCTGTACTCTTACTGTTTGAAGTTGCACTTTGCGTTATTCCTCTCTCTA
TATCTGAAGTCGGAGATGCAGCAGGACTAGGCTTGCCTTGTTTCCTTTTATCAGCATAAGTGATCTGTTGTTTCATAAA
CATGGCATTCTTCAAAAGGTCCTGTATGTTTTGAAAATGTATTGCACTNNNNNNNNNNGGACTGCATAGATCTAACAGC
ATTGGTAGCATACTCAGCATCAAAGCAAGCACCTTGAACTCTTGCTTGTATGTCCTCTACTTCATGCTTCTGATCAACA
AGCTGGGGTAATGTTTTTCGAACATGCTCTTGTATTCGAAAAAATGCAAGTGATGGCTCATTAGCAATAACATTTATTG
TCTCTGACAGCTTATCTGAAACTTTCTTTGCTTTATGCTCAAGCTCAGGATCTGTTTGATTTTCTTTGAAAAGAGGCTG
AGTTGCCATTCGAGTGTACAAGCTGTCATTACCATGCATTTTATTATAATGTAGGCTTGAGATTTAGACTTAGAACTTG
TCTCAATATCAATTAGTCCTGTTCACTGCTAAGTAGTGTTAAGTCTGTTAAGTCAAGTTAAGTCTAGTCACTACTGATT
CAGCATTTTCAGGGCAGGGCCTGGATAAGTATATTTATACAGTATACAAATGCATCGATAATTCATCTGACAGATTCTT
AACTGTGAGATAAAA
>00216 10 reads, 1060 bases
CTCTTTCAGTATGTTTCACTAATGATTTCAGTAATACTCATTTTAAGACTAGCAATAGCTGATTCTTTAGTTATTAAGT
CCATATCATGTCACAGGTAAATCTGTGTTATCCTGGAATATGAGTTTTGTATATGGTGTGGATTCAGACAGAGGTGTAG
CACAGAAAGGGCATATGGTCTGGAACCCATGTGAGCCATGTGGTACAGCTATTCTTGACCAATACTTAGCGGTACATTC
TGAAACCATGTGCCCACAGGGTGAAAATGCATAAGTGGGTTGTTCTGAGTCAACATATAAACTTAGTTCACAGCCCATT
TGAAGTTTGATGAATTTTCCATCCATCAAACACAGTGGACATTTACGAATATCAGTGTCAGCTTGTCCCCACTCATGAT
TCCCATGAACATGCCCACAGGGTAAGTACACATAGGGCTGGCGGTCCTTCAAATTCAAAGAACCCCTTGTTGGAAGAAC
TAATGTATTAAGGCCAACGGGACACTGAGGCCGACCAGCATTTAGTCTCCCCACCAATTGCTGAAACTCATTTTCACTA
GGTGAAGCAATAAGACCTAGAGCAGACCTCCAGACAATAGTTGCCCCACAAAGATCTATTAATGTCCCATCTCGTAAAA
TATTGTCTTCTTCTGTCATCTGATGACTCTTCAGTGGAGATGGACGAGAATCCCGTAATGAAAAAAGACTGCCCCCAAC
AGAAACCTCTCTCCATGGGCCTGGCTTTCCTGATGGGGTAAAACCTCCTTGAGGTTGCATTAAAAAGACTCCATTTGTT
GTAAGACCATCAACATTGTCATCTGAACACCACTTCACAGCTTTTTCCCCCAAAAATATATTTCTCCCAGAATCAAATC
CAGCTGCATATATTCTAGCTGTGTAAGGAGGGGATCTTTCAACTATAATACGACAAGCAAATCTAGATATTGTGCTCTG
TGGAGCTGTGTCTCTCTGAGTCCTCAGGTGTCCTGGCACTGTGTCCATGACAACAAAATCTATTGGTCCTTCCATGGAC
CTACCAATTTGGATGTATAGTCACAGTAGTAGG
>00217 3 reads, 966 bases
TSTGAGAATATGAAAGTTGTATGCTGTTGAAAAGAACCCAAATGCTGTTATAACCCTGGAGAATATGAAAGATGAAGAA
TGGGGAGATCTTGTGGAAGTCATTTCCTGTGACATGAGGGAATGGGAAGCGCCAGAGAAGACAGACATTCTTGTCAGTG
AACTGCTTGGCTCTTTTGGGGATAATGAATTATCACCAGAGTGTTTGGATGGGGCCCAGCGATATCTCAAAGAGGATGG
AATCAGTATCCCTGAAAAGTATACCTCCTTCTTGGCACCAGTGATGTCATCAAAGCTATACAACGAGGTTAGAGCATCG
AAAGCTGAGAGGGGAAAGCCACCAGAGGCTCCATTTGAAATGCCATATGTTGTTCGCCTTCACAATTGTGCTAACCTTG
ACACGCCTCAACCAGTGTTTACATTTGTTCATCCAAATAAAGATGTGGTGATCGACAATTGCCGCTTCAAATCTTTGGA
GTTTAATGTTTCACATGATGCCATAGTGCATGGTTTTGCTGGATATTTTGACTCAAATCTCTACAAAGATGTTACACTA
AGTATTGTTCCCGAGACTCACTCTCCAGGCATGTTCAGCTGGTTTCCCATATTTTTCCCTATAAGAGTGCCTATAATGA
TGAGGAAAAACTCCACAGTGACCATAGATATCTGGCGTAGATGCACCCCCAAAAATGTATGGTACGAGATGGGCCTTTC
GTTGTGGTGGTCAAGTGTCACCGATCCACAACCCCAAGGGAAGATCCTACACTATAGGACTTTAGAGCAACTATTAACC
ACAGTGATTACTTGATGTGACCTTTTAAGTAATTTTTTTAATCCATGGATTGTGAAAGATTAGCATGAATGGAGTTGTT
ATTTTAACCTTTTGTAATCATTAGCTTTGTGTACCCTTAATTTTCATCAGATGGAGTTGGTATTATCAATGTTGAGTTA
TTTGACAGRGCATTATCA
>00218 11 reads, 1136 bases
GAGGTCTACTCCTCTCTTATSSSTATRYWWATGATAGTTGGCTCCCATGAAAATGACCTTGGAGAAATGGAAGTTGATT
ATGAGCAAGTTTATGTTGCTCGTCCTCGTTATGGTAGATTTTATGAGCCTCAAGATGAAACTCCAGTCATCCCGAGAAA
TGTTGAACAGAGGAGAACCAATCATTTCTACAGAGAAGAAAAGAGATTGGAAACCTTTCTTGGCCAATGGCTTGATGAA
TATCCGGTTGAACCAGAAGATCTTGCTAGAAATGGATTTGTTTACATGGGACCAGGGGATAAAGTAAAATGTGTGTTTT
GTTTAAAAACATTGCGTGGTTGGGAGCCTGGAGATATTGTCCAAAGAGAACATGAGCGACATTACCCAGATTGCCCATT
TGTGTTGGGTCATTGCCATGACATCAATGTCCCCTTAACAGTGACACGCAACTCAAATTTTGGGGTTAAAGTGAAAGAA
GCCAAACCTGATATGAAGGATGTCTCCAACAGGTTAGACAGTTTCAGAACAGCACCACCTAATATCAGCAAAAAACGGG
ATGAGTTTGTAGATGCTGGATTTTTTTACACCAATAAAAACGATGTAGTCAAATGCTTTGCCTGTGGGGCAGAAAAAGG
ACAGTGGACACAGCAAGAGGAACCCTTGCTTACACATACACAACTGAATCCCAACTGTCCTTACCTTAAAAAGACCCTT
GCTCCTATCCCAGCATCTGCACAAGGTGCTTCTAGGAACGTTTTTCAGGCTTCTGCAAGCAACCATCGTAGTTACAGTA
ATCGACAATCAATAGTAGAGCAGGCACAGAATATTTATAAAACACAGTCTACATTGGTACAACAACCTACAAACACTGA
CCAGAAAACTCAGATGTATTCACCCCAACAGCAGTCCAAGTCCTCTCAACAAGTGTCCAGAAATGGTCCACAGTTGTCA
GTACCTGTTCAAGTATCTGCAGCACAAATTGAAAGTGACTTAAAGAGTCCAGCTGTGCAGGCCATGAGGCAAATAGATG
AAGATTTATCGGTGGAAGAAATAAGAACACTGTTAGAATCGATACGATTAGAAAAAGGTTCTGAGTATCATATCCAACT
TAAAGATTTGGAAAAGCTYCTGGATAAACC
>00219 14 reads, 1053 bases
TTTTTTAACGTCTATACCGTGTCCTTCGAGWWWWAAAGGAGAAGGAGGCAACATTAGTTTCATCGGGTGTCAGTCAATC
CTTAATTGTCTCCACATCTACCTCAGTAGCACCATCTTACACACCAGATTATGCTGCAGGACTGATAGCTCCAGCAACT
CCGAAAATGCCTATCACAATTTTGAGTGTTTCATCATCAACCCTGTCACAACCATCTCCTGCTTATTTACCCAATTCTT
CAAGGCAGATTACACCAAATACATCTTTAACTGGTATGAGTACATTGTCATCAGGAAGTCAACCTGCCACAAAACAGAA
TCTCTCACAACAGCTTAAAAACCAGTTGTTGCAGCAACCTCAAATTATAAGACCTACAATATCATCATCTCTTCCTATG
ATGGCTCCAATTCTTATTGCGCAACAGCCATCAGCTCAAGCAGCCTCTGTTCTTGCTGCTAATGTAGTGAACCCTGGAT
CATCAACACTTTCAACAAATAAAGTTCAACCTGAACATACTCTACTTGTGCCAGGAGGAACTAAATCAATCCAGCCCCA
ATTTGTGGCAGTTACACCAACATCCATGACTGTCCAGGCTCCCCAACCTGCCCAAGCTCCTGGTACAAAAAAAGGATTA
TCACTCACTAAGGAACAGATGATTGAAGCTCAGGAAATGTTTAAAGCTTCCAACAAAGTGTCACGTCCAGAAAAGGCAC
TCATACTCGGTTTTATGGCAGGATCAAGAGAAAATCCTTGTCCAGAACAAGGAGCTGTTCTCAATATTAAACTTAGTGA
AAAAGAAGAAATTATACACTTTCCAGATGGTACGGTAAAGAAAAAGATTGAAGACACTTATTTTCAAATGAACTATGCA
ACTGGAGAATGGAGAAGATTTCAAAAGTTACGAGAAATGGCTGTGTCATGATACTCAACTTCTCATTGAGAGGTTTGAA
CTTTGACCAACTAATTGCTAAAATTGTTTCAAAATATTATACAAATAATACAATACAAATTAATGGGCACAGCTTCATT
ATGTAACTTAAAAGCATTCTCAAGGC
>00220 4 reads, 1310 bases
ATAATTTACTCCAATTTTCTWSSSWATMGYACATTAAAAAACAAACATTCAAACAACACTACAAAGTCTACAAATTACA
CAATGTTATCATGAATTTTCTCCATCATTATCCACTTTTTATTTGCTCTTTGAGAATAAGTATACTCTGCCTCTGCTCA
GGTGGAAGAAGTGCAATCTGTTCATCCGTCAGTTGCAGGACTTGCATTATGAGGGCAGCTTTCTCTTGGTCTTGTGTGG
TTATGCTTGATGTACCATTTGTGGACGCACCAACATTACTTGCAGTGGATGGTCCACTTGGCATGATATTGGAGGGCTG
AGCTGCAACAGGTCTCTGATTGTTCATCATACCTGGAGCAGGTCCCTGCATCCTGCCCCCTACAGCTACTCCTTGCATG
GTATTGGGCTGAGGAAATCGGCGTGCTTCTCCCATGTCTCCTAGTGGCATGTTTGGTCGCATCATCATCATGTCTGGCC
TAATAGGTGGAGCAAGTGGACCAGCATTTATGCCTGTGTGTGCTTGACTCATGGCTCCCATGGGACCAGGCATAACTTG
TGGTCCTCTAGGTCCCATCATGTTATTCACAGAAACTCCCATAGGCTTTGATTGATTGCTTGGCATATTAACATTTATC
TGAGGCTGGGTTTCATCACGATACAACATGGACATAGCTACTTGTGGGTCAACAATTTTCATCACTATCTGTGCTTGCA
AAAGGGCATAGGCAAGTTGTGGGTTCTGAAGCAACATGTTTCTGGCCTCATTTGGGTTGTTCTGAATGCAAAGCTTCAT
TTGTTTCATAAGTTCAAACATTTGCTCTGGCGGAAGGCTCGCAACAGCTTTAGAGATGGCCTCTGGTGCCTTTTCTGGT
TCCACAGGTTCACCATACGGAGACTCTACTATTTGTCCACCCAAAGCCTGTTGCATTGCTTTTCCCTCATCTTTACTCT
GCTCTCCAGCAGCTACACCAACACGCAGAGGTCTGCCATTGAAATCATAGTTATTAAGGTTCCGCATAGCACTTTGAGC
AGTTTCCACATCCTGGTATTCACAAAATCCATATCCTTTAGGCTTTCCTGTTTCCCTATCATAAACAAGCCTAAAGCTA
ACAACTGGTCCTGCTTGAATGAAAACTTCCCTCAGTTGTTCTTCTGTAGCATCATATGGAATGTTTCCAACAAATACTG
ATCGTTGAGCTCTATCGGCAGCTGAAGCAGCAGCTGATAACGGAAGATTGGGATCTTGAGGAAAGGCTGGGAAATTTTG
CATGAAAGCTGCCATCTTTTTGTCCCGTACTATATTACCCTGTTAT
>00221 2 reads, 1015 bases
TGTGCTGCGAGAAGGCTAGACCCATTATTAGTTGTCCAATATTGCTCAACTGTGTGCCGTATTTAATCCCGTGTTCCAC
CTCGGAAAGCCTAGCGTGAACAATAAATTAAATGGAAATCCATCTTTGAGAGGAAACATAACCATCACTGAATCAATCA
CTGTTCCCGTAACCACCACCCAGCACATGGACACAGACCCAAACCCAGTATTCAACAGACTCGGAATTCAGCACGGTTT
CGATCACCAGCACAGCAACAGTCGACACGGAGATCGACGTTACACAGACCATGTTCGTCACAGAGACCACAGACTACAC
AACCTTATACACTTTCGAAACATGCACCACGTTCACAGATTTCGAGACCACATACATCACATACACCGACTATTCCACC
GCCGATGACTTCGAGACCACAACGGTTACTGTGTCGCCAACATCCACAATGTTCACCGACCTCACAACCACCGAAACAT
CCACCGTCACCGTAAACGAATACTCGACAGTAACTGAGTATAACTCAGTCACGGAGAGTGTCTACATTTGCACCCCGGG
AATCACATCCTCGATCCTAAACTTCAATCTTCTTGCATTCCAGCAGCAGCAGATCAATGGACTGAACTCATTCCAAACA
TCTGTCTTCATGCCAGGCCTCACATCCTTGAGCACAACAAACAATTTTTCAAGCTCGCTGATCTCAGGCCCCACAATCA
ACCAACTATTTGTGGATCTGATGTCGATCTTGACCGACTATCAGCAGACACAGATTGCTGCACTAAGCAATGGACAAAC
ACAGGCTCAGCAGCTTACCGACTTCCAGAACTATCAAATTGCATCTTCAAACGCTTTAAATGAGTTCCAAACCGCACAA
AGACTGTCAATGGCTTACAATATTTTGACTCCTAGCGATGCAATGTTCGTGGAAAACAGCGTATTCCCTCTGGAGAGTT
CCATGCTGACCAACTTCCAAAATCAACAAAATTCAAACTTCCTAGTCTTCCAAATGCAACAGATGCA
>00222 3 reads, 1194 bases
AAGTAAAACATCTTGCAGTGAGTTTATTAAAAAGATGACCCATGGTTYMRATSTAGGATGAATAAGCATCACACTTTCA
TTAATTTAATGTCAAAGGAGATCAACTTGTTAATGATTTTTGTTGCACATCATCTAGACACATTATACACAAATAAATC
CTCAGCTAAGAGAACTTTGTCAGCAGGTAAAATTTCTAAAGCCTCATCAAGCAGGATCTGTGCACTTTTCTCATCATTA
TTTAGCTTTGCAGATACAGGTTTGTATCTGGAACTAACATGATTTAAAATCAGCAGTTTAACATTCAGGTCCTTTGCTA
ATGTTGCTGTCATCTCTGGGGTAGAATGACCATTTTGGACACACTGCTCACGTAATGAGTTTTCTAATGTAGCTTCATG
CACAAGGACTGTTGCTCCAATCGCGAGTTTGTGCAGCTGGCTGGAATCTGACGAGTCTCCTGAAATAACAATCGTTCTT
CCAGGTATGGAGTCTCCAACAACATCTGAAGGCAAGATAGTGGTTCCACTCTCTGTGACTATTGTCTCCCCTGCCTTTA
ACCTGGCATACAGAGGACCAGGAGAAACTCCAAGTGATTTCAATTTCTGGGCATCCAATTTGCCACTCTTCTCTGCCTC
TTTAACAACAAATGAAAAACTAGGAACCCTGTGCTTGACCCAAACTGCTTTCACACTGAGCTTGGAATCAGAATATAAA
TTCCACAGCTGATTATCATCAGCAATGATAATGCTACCAGGACATTCCTTGGGGTGAAATGGAGATTTAATGTCATTTT
CTACGGGCCATTCCTCTATGTTATCTGGCAACTGAAAAGGCAATGGTTGAAGTTCACGGACAACAAAMTGGAATAGTAA
GTCTGATCGAGAGTGGCATAAGACTGTGTTTAAATAATGCCGTAGACCAAGAGGCCCATATATCTCTACYGGAGCTTCT
CGTTGATTGTTCTGGCTCATTGTGCACAGCAGCCCAGGAAGYCCAAACAGATGATCTCCATGCAAGTGTGTAATAAAGA
TTTTATTTATTTTCCCAGGCCTTAATGCACTTTTCATTAGCTGTATTTGTGAGCCTTCACCACAATCAAACAACCATAT
ACCTTCATCGTGCCTAAGGGCTGTACATGACACACACCTGATGGGAGTGGGAACAGCTGAGGCTGTACCTAAGAAAGTA
AGCTCTAAT
>00223 8 reads, 897 bases
TTTTTTTGACTTTGCACATAWSSWWSWWWSTCCTTTCAGGAGTGAATAAAATATAATTTATTGAATTCAATCTTTCATC
AAGTCACTTTCGTGCAGCATGATGTAAAGGCCACTATTTTCTTCACTGCCGAATGGAAACTCTCTTTAGGTTTGAGCAG
AAGATTTGACGTCAGCCTCGACTGAGAACCTTTGACTTGGGAACATTTCAAGTTAACGACGACCTTGTATCTGGTGTAG
TGAGGGACGGGACTTTGTTACGGTATTCGGGCCTCCTGTATACAGTTTTCCCCTTTTTGTGACTCCCCGTCTTTTGAGC
ATCAGGTAATCATCACCATCAGAACTTGCAGAATCTGCCAGGTCTTGTCCAATGTCCAGTCTGTAATTGTCCTGATCAT
TTGGTAATTGAAAATCTGTTGACTCGTCCAAAATAGACTTGAGAATGTTGGACAGAATCATGCTCTTGACCATATTTTC
ATCAATGACACCAGGTTGTGTTCTTTTGGCACTTGGCGGCTTTGTAGGTGGGTGGTTACAACAAAGCAGTCCGCCAAAT
CCGAAACGTTTATCCTCTTCACTATCATCTTCTTCATTGAAATTTGACGTCTGATAGATGTTTTGCCGAACTGCCTTTT
CCCGGTCATCTTTTTGAGATATTGGGTTGTAGAGATCTTTATTGTTGCTCTTATGTTTCGGAATCTTGTCCAATCTACT
CATGAGGTTTGTCCACCAGCCATCATCGCTGTCTGCTGTAGTGCACTGGAGGATGAGGATGACAACCAAGAAAACAATC
TGTACACAACCAGGCTTCATTCTTGTATCACCTAGTCAGCTAGTCACCTAGTCAGTCAGCTGAAAAACCTATTGGCTTT
GTTCCTGTCTGGATCCTATTCTCACCAC
>00224 3 reads, 1142 bases
GAAGGCTAGATTCTACCGCTGCACTTTGATTTCTGCAAAATATCCCCCGAACATCGACCCTACTAAAACTCCGCTAGCA
TATGGAGATAGWGCAATTCCTCGATTGAATAGAGAACTAAATGATGATAATCTTCTCAAACGTCAGAGGGCGGTGATGT
CACTGTGTGACTTCCTTCATGATCCTGAACACATAGCTGAATCAATAAGAAATGGAATAGACAAGAGCCTAAAAAATCT
TTTAAAAGATCCAGACATCACTGTGCGACAGAAAGCAACAGAATGTCTTTGTATAATGGCAGGATATGCTATTGGCAGA
GATTCTTTTTTGGAAAATGAAACTATTTATCCTGTGGCCAGACTCTTTGATGATCCAGAGCCTATAGCACGAAAGAATG
CTCATATGTGTGTCATGAGGGTATCAGAGACTCCCCCAGGTGCAGAAGGCATTGTGCAGGCACAATTTATAGACTTATT
GGTGAAAAAACTTGAGCTTGAGTTGGACAATATAAAGGACATCATTCTAGACACTCTGCATTTTTGTATGAGGGTGGAC
ACAACTGATGCACTTGAAGCAAATGCCATGGAAGCATTTACACTATTGCTCAAACATGAACAGCCTACAATAAGATTTA
AGGCAGCACGAGATATAATGGATCTTAGTGTGCCTTTGGCAGGAAAAGATAGAGCTGTAGCTTGTGGAGCTCTTCAGTT
ATTGAAAGACATGCTAAAAGATCCGACTACTGAGGTCAGGGCTAATGCTGCTGGAGCCATCATGACAATTACCATCACA
ACAAGAGGCAAATATACCGCTATTCATGCACTAACAATTCCCGCTCTTGTTGATTTAGTTGATGATTTGAATAGTGAAG
TCAGACTGAATGCTATTAAGGCTTTAACATGCTTGTCTGAGGCACCTGAAGGACGACAAGAACTCTTGNNNNNNNNNNC
AGCATGTTGAAAAGATACGAAGCCATACAAAGGATCATATACAAGCAGTTGCCAGTGCAGCCAAAATAGCAGTTAAGGT
CATCACATGGCTCCCATAATAATTATTTTGAAATATAACACTACCAGCTTCACAGCTTAATGAAAGATTTTACTCACAG
ATATAAAAACTATAAATGATAGTTTGAAGAATAAAG
>00225 4 reads, 1009 bases
GCGGTAAAAGCGTTTCTTTAAATCTWGWASATCAAAAAACTATTAGAATTCTGTTCTAGTGTCTAATTTATTATGTCTG
TCTGTTTCTGTCCTATGCACTGYGATCGGCCTCAGCAGTAAGCTATGAGTTCTTGGAAGGTGCACGCGTTGAAGCAACA
TTCACACACGATGTTTGCCCGTGATTCTCTCTTGGTCAGATAGGACAGCGCCTTCTTTTTGCTGATCATTATTTTGCTC
CTCTTCGCATCAACTTCGACTGATTGTACTTGTCGCTTGACCCTAGCTGCTGTCGTGTGGGTGCTACACAACCACTGGA
CCATGTTGGCGAGATTGGAGCCGCACAGACCTCTGGGATGTGGTCGGCTGAAGATGCTGCAGGTGTGTTGGTAGGTGGC
CCGTGTCACGCTGACATTCAGCAGCAAGGTCAGCAACACTGTGACCAGGAAGGTGTTTGTGGTGGTCATGTGGACACTG
GACATGGTGGTGTTTACTGAGTCAGGCTGAATATGATGAATGTGCCTGGTTGGCCTGCTGTGGTAGTGGCGGAGATGGT
GGTAACACTTTGAATAGCCTTGCTGCATTTATAGGTCCTGGCAATAGAGACGCTACACAAGAGTTGTGCTGTTCAAACG
ACTTTCTAAGACTTCTCTCTTCCAATCGCCGTCTGCTGTGGTCAGTAGGTCCGGCAGAAGTCAAGGTTTCCCCCAGCAG
GTCTGCTGTCAATACCCTCTCACGTGCGGAAACATTTCACAATCTTCAATCGTCAACAGTCGGCCAAAGAATTCGTGTC
AACTTATCCCCTTTAAGCCAATCAGCTTGAGCGCATCAATATTTCAAATACTCTCGAACCTTGAAAAGTTGCAGGTGAA
TATCATCAACCGATGACCTCAGCGTCTAAGACCAATCCGAGTTCTCCAAGCAAGGAAACCCAGTTCGGGTACGAGCAAT
CTTAAATAACATTACGGGCGAGCAAGTGGGAGGGAGGGTCTGCACAATATGCTCCCACCAG
>00226 6 reads, 1167 bases
GGTACCGGGATATCAGTAAATTCTTTAAATTCTCCACTGCTTTTTTCAAGCTAAAATTCTCCTTTTTTAAATCTTGGAT
TTTCTGTCTTAACTTGGCTCTCACAGCTGCTTTCCTTTTCATGTCCTGATTCAGACGCTTGACATTGAATCTCTTGGAC
ATTTCCCTGATTGTTTGCTTTGAGGCTCTAAGTTTTTCCTTTAATTCCTTAATAGCTGTCCGGTAAGATCGTCTTATGG
CAGGGCACTTTTTACAATCTGTTTTGAGTTGTATGTCCGGTTCCATGGCTGCATTGCTCTCCTGGCTTTCCCCATTCAC
ACCAAGTGGAGTAGGTTCATTGGTTGCAGCCAAAGAAGGCTTTTTTTCTTTCATTTGAGGCAATCTGAACATCTCATTG
AGATAAGATGTAATCCAAAGCCAGTTCCTACCTAGAGCTTTCTTGTGACTTTCAATAGTTTTTATAAAACGCATTAGAA
CATTTCTGATAGACTTTGGTCCATAAACATATCCCTTAGCGTTTAGTTTTGTGACCAGAAACTCTGCTGCTTTGGATTG
TTTCTTCCCCAAAGATGCGTAAATATTGTAAGCATAACCATTTGTAAATGGAGTGCCTTCTTCAGAAGTGAATGAACTG
ACCAAGGCATTAAAGTTCCGAGCCACCTTTTTTTGGTTACTTGTTGCAGCATCCATGGGCACAACCTTTGTTGACAAGC
TCGAATAATCAGTTGAGATCCTACTTTGGGCAACAGATATTTTTTCATTTGAGTTTGTCTCATCATCGTCTACTGAAGC
ACAGTCATCACTGGTTGCAGTCTTTGATTTCTTATTGGCTGCGTCATCTGTCGACATGGGGACAACATCTACTGACATG
CATGAACCATGAGTTGGGATCTTACTTTGGGCGATGTTTATTTTATCTTTTGAGTTGGTCTCATCTTCTACTGAGGCAC
AGTCATCACTGGGTGCAGTCTGTGATATCTTACAAGACATGTCATCAGCTGACAAGAAAGTGGCCTCGGGTAACATGTC
TGACCCATTGGTGGTTGTCATTTTTAATTTGATGATCTAATGACCAGAACAAGATGTTGCTGCTTTCCTTTCAACTATT
TCTGCTTCAAGCTAAGGCTAAAGTSAAAAGTCACTATTATCCTGTTATCCCTATTTTTTTT
>00227 2 reads, 935 bases
GAATGCCATCTTCTTTTTTTGGAAAAGAAGCCAAAAAAGCACACCTCAAAATTTAGAGAGACTGTAAAAGAGGAATATG
TTGGTGGAAGGGATACTTATAAAACTATGGGCCCGGCTAAAGTCCCAGTACCTAAACCAACAGATTATTTGAAGAAACA
TGAAAAAGAACCACAGCTTCCAAACAAGGAGGAGTTCCACTATCCGGATGAAAATCGAAAAAGACCCCCAGTTCCTAAG
AAAGATGAATTACCTCTAATGGGTCTGAAAACAACAAAGAATTTTATTAACACCAATGCTGTTGAAAATATTACAGCAG
TACCTAAAGTTCCAGCCAAAAAATATGTGGATACCAGGCATGGAGATGCGCATAACTTAATTCCTTCAGGATTTGAACC
TGTTTATGTTCACAAAAAGGATTTTGGTGAAGTACCAACATACTTAGTCAAGCGCAAAGAAGAAGTAAAGAGAGCACAA
GATGAATATGACCAGTATATTGCAGAAAATTTCAAACGTGGAGCCCTGCGCCAGCTGACTGAAGATGAGCGTCAAGCCA
TTTTAGATGGACTGAAAGCAAATTGGGAGGATATACAAGACCAATATCAAGGCTTGTCAGTTGTCACAGATACAGCCCC
CAAAAAGCAGAAAAAAGAGAGGATGGAAGCACAGATGAAACAGCTTGAAAGAGACATTGAACTTTTTGAGAAACATAAA
CTTATTTACATAGGAAATTAAGTGGCACCACATTACATATGTAATTTTGTTTATTGCAATGATTATTTAAATTCCATCT
ATWAAGAATGGAATGCTGAAAATTGAAAAGGAATTTTTTTGGTAAACTGGGAATTTTACTGTCTAGGTACTGTTTGAGA
TTGGTGTCACCATCTAAGATCAGATCATTTCAAAATATTGTGGGAATGCAGAGGCTATGCTATTCT
>00228 3 reads, 1297 bases
CAAATGAATGGATTGTTAGCTAAAGTAAAGTCAACAAGATGGCTTGCAAGGCACTTACGAAATTTTCGCCAGGGTCTAA
GGCCCTAATTCAACTCATTCAAACGAGAACCGCTCAAASSGYARTCTGCACCTGCTGCCAAAACTGAGAAAAAGTTGAA
GAAATTTGAGATTTACAGATGGAATCCAGACAAGCCTGGAGACAAGCCAAGGGTCCAGACATACCAGGTGGATCTTAAT
GACTGTGGTCCAATGGTTCTCGATGGCCTTATCAAGATTAAGAATGAGATGGATCAAACCTTGACCTTCAGAAGGTCAT
GTCGTGAGGGCATTTGTGGATCTTGTGCCATGAACATTGACGGGACAAACACCTTGGCTTGTATCTACAAGATTAACGA
CAGTCCAAGCAAGCCTGTGAAGGTTTACCCACTGCCTCACATGTATGTTGTGAAGGATCTGGTCCCTGACATGAGCAAC
TTCTATGCCCAGTACCGTTCCATTGAACCATATCTCAAGAAGAAGGACGTGAAGGAGACTGACATTGGCAAACAGGCTT
ATTTACAGTCAGTGGAGGACAGAGCCAAACTGGATGGCCTCTATGAGTGTATCTTGTGTGCTTGCTGCAGCACTTCCTG
CCCAAGTTACTGGTGGAACTCTGACAAGTATCTGGGACCAGCTGTCCTCATGCAGGCCTACAGGTGGATGATTGACTCC
AGGGATGATTTCACAGAAGAGCGTCTTGCTTTGATGGAAGATGGTTACTCTGTGTACAGGTGTCACACTATCATGAACT
GCACCAAAACATGTCCTAAGGGACTTAACCCAGGCAGAGCTATTGGTGAAATCAAGAAACTCATGATGTCCTACAACAA
ACAGAAGGCTGCTCATTGATGACCGACAAGACCTTACTCACAGTTAACTCATGTGGTCCCTCAYGGGTGGAGCTTGTAT
AATAATTTGTCTAGAGTTGTTGTTAGATAAACGCTTGCATCTGTTGATGGAGGATTGACAAAAGTGAAAGCCATATAAC
TATAACATTTGTTTAAACATAGAAGTATTTTAAATGGAACCACTGATATTCTTTTTAAAAAAATCTGTTTGCCTTTTTT
GTTTTGTTGTTGCAATGTTATCTGTAGAATCTTATTTGTGTTGTGTCATGTGTTGGAGACGGGATGTGAACATCAATGG
TTTGTGGGGATGTMCATCCATCCATCCCTGTGGTGTAACAGCCCATGAAGGGCTTGGGCCTGAAGTGGGGAAGTCAGTT
TGTTTTATTGTAGTTGTAGGGCGGGGATCAGAT
>00229 10 reads, 1078 bases
ACAATGCAGTAAAGGAAGGGTATWWRSSCRTGACGCTCATTTCACTTCCACTTTGCATGGTTCGATCTAAACAAAGACG
TGCTTGTGGAGATTAGGTAAAACCAAACATATCCACTATGGCGCATCCGAGGCCGGACATACCAAGTGGATTGTTGGGG
TCGAAGCCTGGTTTTAGCGAGCTCAAGCTCCAGACGGACACCCACAGAAACTCGGAGTTCAAACTCGAAGGGGTCAACA
ATGTGGTGATCAGGATCAAAACTGGGGTGCCCATCAAGACTGTGACGCAGCTCATCGAGTGCTCCACGGAGACGGAGCA
CCCCTCCTACGTGCTGGTGCAGCGGAAGGACAAGGACGCCGTCCAGTTCCACGTCGGCTTCCCCGGCAACGGCTGGTTC
AAGTTCCTCATCTTCGCCCTCCAGGAGGAGGACCCCAGCGACTCGCTGCCGAACGTCTACAACTACCTCATCAGCGCCG
AGCAGGTCATCCGGCCGGCCAAGCCGTACCCGGCCATGTACTCCAAGTTCTACAACGACTGCTGCTTCCTGTACGAGCC
GATGGTGCTCAACATGACCTCGAAGCGCCTGAACAGCGTCAAGTTCAGCCTGGTCGTGCCCGACGCGCTCAAGGTGGCG
CTGCACGTGATGGACGAGTGGTTCCACCTGGAGAAGAACGGGGAACGCTTCGAGAAGACGGTGGATCTCACGCCGTTCA
AGGAGAAGGGGACGACGATACAGGCCATGGCGTCGTACGAGGCCCAGGGCACGAGATACGCCGCGCTCCTCGAGTACAC
CATGTGAAGAGTAACCTCCCTCGTCACGGCTCTACATTCAGTGATAATGATGGACTTTTTTCCCCTATATTTTTATTAT
ATATTTTTCAGTTAAAGAGTCGCCCACTAACTTTGTAGAGGAAAGAGATTAAATGATTTTTTTCGTAATCTAAAGCTAA
AAATAGCTTCAAKTGAAAATCCCGAGATCAACGGACCATTCTTTTAGGGGAAACGTTTACTGGGTAAATTAGAATACAA
GATAGTTAGAGGAAAACTTGAAGCTGAACTAAAAGAAATAAGAAAAGGTCA
>00230 5 reads, 1148 bases
GTACCTGTCAAACGGCATGAAGAGGAACCCTTGCGTCATGGAAGGACTCAATCAGTTGTTTCAGTGCCTCTTTGCTGTG
GCCCTACAGCATGTGGGGATGGAACCAGGAGAGGCATGGGCAGAGGATATATATAAATTAGCTGTTGTCCATAAGACTG
AAGGCGTTTTAGGCTATATTTACTGTGATTTCTTTGAGAGATATGGAAAACCAAATCAGGATTGTCACTTTACCATCCA
AGGGGGTCGACGGCGTGAAGATGGAAGCTATCAACATCCTATTGTAGTTTTACAATTGTCGTTGCAAGGGCCGAGAGGG
GCCAGTGTTCCTACCCTGCTAAGTCCAGGCAATGTTGATAACTTGTTCCATGAATTTGGCCATGCCATGCACTCAATGT
TAGGGCGTACCAGATACCAGCATGTAACAGGTACAAGATGTACAACAGATTTTGCTGAAGTTCCTTCTGTGCTGATGGA
GTTTTTCGCAGCTGAACCAAGGGTTGTCTCCACCTTTGCCCGGCATTATAAAACTGGTGAGCCAATGAAAGGAAGTGCT
GTTGTGAACCTTTGTGATTCTAAGAAAATGTTTGCCGCCTCTGATATGCAGCAGCAAGTCTTTTTCTCCATGTTAGACC
AAGTATACCATGGTCCTCACCCACTGAATGGTTCAACTACAAATATTCTAGCAGAGATGCAAGAAAAGTATTACAACAT
CAATTATGTCCGTGACACAGCTTGGCAACTGAGGTTTAGTCACCTTGTGGGTTATGGTGCCAGATATTATGCCTATCTT
GTATCCAGGGCGGTTGCAGCAGAAGTCTGGCACACCTGTTTCAAGGATGATCCATTTAGCAGGTCAATGGGCACGAGAT
ACAGGGAAGAGATGCTGGCATTTGGGGGTGAAAAGCATCCCAGAAATCTTGTTGAAGGCATGTTGGGGAAAAGCCCTAC
AGTACAAACTTTGGTTGATTCTCTCATTTATGATATGGATGAAAGCATAAAATCATTGGCGCAATAGTAAATGGCATTA
CTGTGGAAAGAAGATTGACTTTATAAGCACCGTAAGGACCATGATTGATTCATTATAGTCATGAAGGAACCTTTCTGAC
TTTAAACAGAGACCTTGAAATAATGTATTTGCCTAATAAAAA
>00231 15 reads, 1129 bases
TCGTCCTAAAACTTCTTTTASSWWSTATRSCAGAATGTATCCCTATTTTTAAATCTTGCCAATGATCCCACCATTGAAC
GTATCATCACTCCACGTATTGCCCTGACCACAGCTGAATATTTGGCATACCAATGTGAGAAACACATACTTGTGATCTT
GACAGACATGAGCTCCTATGCTGAAGCCTTGAGAGAGGTCTCTGCTGCTAGAGAAGAAGTTCCTGGACGTCGAGGTTTC
CCAGGTTATATGTACACTGATTTAGCCACTATCTACGAGCGAGCTGGTCGTGTTGAGGGCAGAAATGGATCCATCACTC
AGATTCCTATTTTGACGATGCCTAATGATGACATCACCCATCCCATTCCTGATCTTACGGGATACATCACTGAGGGGCA
AATGTATGTAGACAGACAGTTGCACAACAGACAGATTTACCCACCTATTAATGTGCTCCCATCTCTATCACGTTTGATG
AAATCTGCCATTGGTGAGGGGATGACCAGAGAAGATCATGCTGATGTTTCTAATCAGTTGTATGCATGCTATGCTATTG
GCAAAGATGTCCAAGCCATGAAAGCTGTTGTTGGTGAAGAAGCCTTGACGCCAGAAGATTTACTTTACCTTGAATTCCT
CATTAAATTTGAGAAAAATTTTATAACTCAGGGTCACTATGAAAAAAGGACCATTTTTGAGTCCTTGGACATTGGTTGG
CAACTGCTTCGTATCTTCCCCAAGGAGATGCTTAAGAGAATTCCACAGGCCACATTAGCCCAGTACTACCCTAGAGCTT
CAACACAACATGCAGCTGGTGGAAAAAGTAAAGCTGAAACAACTGCCCTTTAATATTGCCCCCAAAATTTTGATTTCAA
TTCATTAAATGGAACGGAAGCCACCCTTCACAAGCCCTTTCCTAATTTTGGTCTTGTTAAATTTGATTCCAGGTCTGTT
GAATTATTTTATTACAGCAGTGGATTTAAAGTTTTCAAAATTTAATGAACAAATTTACTGAGGGGCAAGAGGGTTCTCT
TATTTATAATAATAATTTAGTCCAGAGTATTAGTGAATATTGGTCTTAGATTCTTGTATTATATTTTTTTAAAGGCCTT
ATGTGATAGTTTTAAATTGGCAG
>00232 6 reads, 1099 bases
GTTAATACTACCGTCAACTCGTCTAAGGAAGTSTTYACAAATTAAAGATGCCTGAGGAGGAATCTAATGTTAGATGCAA
TTCTTCACCCAGACTTTGTCGCTGGCTAATCACTAACTCTAATTGCTGCCAGCAAATAATATTCCCTTATCACTCATAC
AGTAGCCATGGTGAGAAAAGTCAGGAGACCTCAAGTCGTCACTACCTCCATCAGCGGTTTTCAAATCTGTTTTGCTTCT
CTAAAGTTTATGCCTCAGATTTAAAACTTGAAAATACGGCTCAACGTAATCATGAAAACATTGAACCGAATTCAAGTCT
TTCAAGAAGTCTTTCACAGCAGGAACTGACAGCTCTTAACTTGAATTATCAGGAACTAGAGATGATGGCTCAGGCTTAC
ATTGAACAAGAAACTGGAATGGAAAGAATTTACATGATATTTACAAGGGATCACAGAGGGCATCGTAGTACTGAGCTTC
AGGTGATTAATGTGGCGCTAATACAGACGATGGTGATTGGTTTTTTCTTGAAGTACATCCCGACCTGGAAGATGGCTAG
GGACACATTCATACAGGAACATCAAAGTACTGTCTTCAAAACCCGTTTGGAGGCCTTGAGAAGACTACAAGACCAGGTC
TCTTACAAAGCTGGTATTGCTGGTGCAAATTTTGCAGTAAAGGTCACCTGTTTCTCAGCCAGTTTTCTATTCCTCTCTC
AGATGATAGCTACCTATAGGAATAAAACATCAGTCCTTGATTATACAATTGCTGCTGGTGTCACYGGAGGGCTGACACG
GATCAGTCTTGGATTAAAAGGTTTTATCTCGGGATCTGTCATTGGTGCCACTTTAGGGACTTTCCTTGGTGGTCTAGTC
TGTGTGATGTTTAAATATTTTGGTATTACTTACGATCTACGACATCTGGAGGCTGTTATATCAAAATTGGCAGTTGAAA
AGTCTATTATTGGCGAGGCGCAGTTTAAAGCCAAGTTGCAAGAACTCACCCAGAATAAGCCACTTCCAACACAAGCTGT
TTCATGATGAATGTCATTCCTGTATGACAGGAGACTTTTCGTGTGTCATCAATGAATTTATTGCTGCTGCCA
>00233 5 reads, 1426 bases
ACTTGGCGAGAAGKSTAGAYGCTTTTGCCCTCTATGAAAATGGCGACATTCTGCTGCCGCATAAGCACAGTTGCAAGGC
ATGCCAAAGTACTGGGGAACACTGCTAGATTAATTACGACCTCATCTCATAGAGGCGCTCAACAATTGACTGTCAGAGA
TGCCTTAAATGCTGCCTTAGATGAGGAAATAGCAAGGGATGAAACAGTTTTCCTACTGGGAGAAGAAGTAGCCCAGTAT
GATGGTGCTTATAAGGTATCAAAAGGGCTTTTGGCTAAACATGGGGAAAAAAGAATTATTGACACCCCAATCACAGAGA
TGGGATTTGCTGGTATTGCTGTTGGTGCAGCAATGGCTGGCCTTCGTCCTGTTTGCGAGTTCATGACCTTCAACTTTTC
TTTGCAAGCCATAGACCAGGTTATCAACTCGGCAGCCAAAACATTTTACATGTCTGCAGGAAGGGTGCCCGTACCCATT
GTATTCAGAGGTCCTAATGGTGCAGCAGCAGGAGTGGCAGCTCAACATTCTCAGTGCTTTGGTTCATGGTACAGTCAGG
TTCCTGGATTAAAAGTGATATCTCCTTATTCAGCTGAAGACTGTAAGGGATTACTTAAATCTGCTATCCGAGACCCAAA
TCCAGTTGTCTTCCTTGAAAATGAATTGATGTATGGTATTACCATGGAAATGTCTGATGAAGCCATGTCTAAGGATTTT
CTACTCCCTATTGGAAAAGCTAAAATTGAAAGACAAGGAAAGCATATAACTCTAGTAGCACATTCAAAACCTGTGGGTA
CATGTCTTGAAGCAGCAAATGAATTAGCTGGTAAAGGAATTGAATGTGAGGTAATCAATTTAAGAACTCTTCGACCTCT
AGATGAGGAAACTATTATTAAATCTGTGATGAAGACGAATCACCTTGTTACTGTGGAAGGTGGATGGCCGCAATGTGGC
ATTGGCTCAGAGATTGTAGCCCGTATAATGGAAAGTGCAGCATTTAATTACCTTGATGCACCAGTTCTTAGAGTGACAG
GAGCAGATGTACCTATGCCATATGCAAAATCTTTGGAGGATCTTGCTCTGCCTCAAGTTAAAAACATTCTCACAGCTGT
TAAAAAGTCTCTTAATATTAAATGACATAGTAAATAAGATTACRCTTTACCAGACATTAATTTTTCTAAATGAGCAAAT
GTTTTTGTTTACTTATTACTACATAGGTAAACATATAGAGAAATAAATTACTACACCCAAGCTTACTGTAACTTGAGAT
AAAATCATAGAGTTATTTGTTGAATACCATTTAATTTATAAGCAACACAATTTCATCTGGATGCTAAATTTTTATGGGA
TGGTGTTTCTCGTACATTTGATCAAATGTTTTATTTTGGGGACTAAAACAATTTCAGTCATATATAGAATTAAAAAAAA
AAAA
>00234 12 reads, 996 bases
ATAAAATAATCAGATTWWWWAAATATTTAGACAAGGGTCTACAATTTCAAAAGCCTTAATTTTTCAGGTTAAAATATTG
ACAAAAAAAGCRTAWWTRCRWKCTGGTTGTCTAGTAATAACACAGTGTCTGTAAATAAAATACAATTAACATCTTAAAA
TAAAATAAACATCCTGAGAATGTTATAACATAAAGGAATATTTATTCAGTAACTGCAAAGGGATATATATTTGTTGGTA
CATGAGTTAATAAAAGCAATAAATTTATTGAATACTGCTTTTGTGTCCCTAGTAATATAATATAAAGTCATTTGAGGGA
TAAGTGTTAAGCATGAACAAGCACTTGACTACATCAAGTTTAATATAAATAAGTGGATTTACCCTAAAAGCATTTGTGA
TTTGAATAGCACTACACAACCAAAATTTCAACTCACTGGCTTTGGTTTTATGAATATTCAATAAGTTTAAGAAAGCTGA
GACACTTCAAATAGCCAGACTAACATTAGCATACACCATTGAGTACATTACAAAAATTCTCACCAGTTGAACAACTTTA
TCAAGGAAAAATAATCAAGTAGATCAAAACTATGCTTAAAATATAATCCTGTAAAAGTTAAAGCCACACGCAAACTAAC
GCGCTTCCATTATCCACCAATTTCTGTCCTTACGACCTTGTTTGGTGGGTGGGAAGAATGGGAAAAATTAAGGATCCTT
TTATAAATGTTTAATTAGAGCGCCAAAATTTAATGTTTTAAATGAAAAATAATAGGACAAAAATTACCAACACCAAAAT
AATGAACATACATGTGAATGAGTAAAATCACAAAGGATGGCTTGGATGAGTAACATATATAAACTGTACTAAAGACAGG
TAAAGTACAGGAAGAGATATATTTAAACAAACCATGTAACAATCTGTATTGCACAGTGACACTGGGTAAAATAATTTAA
AGAAGGGTTTTTTTTAAACAWRAAWWTGTTTATCCTGAAATTTTCTAT
>00235 3 reads, 1146 bases
CGCACAACCAACCCTWRYWATTGTTGACTGCTATTGCAAGAAATATTAATGAAGTTGAAAACCAGATCTTGACCAGGGA
CTCAAAGGGCATCAGTGAGGCTCAAATGAATGAATTTAGAATGTCCTTTAACCACTTCGACAAAAACCGCACGAAGAGG
TTGGAACCAAAAGAATTCAAAGCCTGCCTCATCAGCTTGGGATACAAGATTAGAGATGACAAACAGGGAGAAGCTGATT
TCCAGAGAATCATGTCCATTGTGGACCCTAACCGTTCAAACTATGTCACATTTGATGCATTTTTGGACTTTATGACACG
TGAGACTGCTGACACTGACACTGCAGAACAGGTCATGCAATCTTTCAAGATTCTTGCTGGAGATAAGCCATACATCACA
GCACAGATCTTGAGACAAGAGCTTCCGCCAGACCAGGCTGAATACTGTATCCAGCGTATGGCTCCTTACACTGGCCGTG
ATGCTGCCCCTGGTGCCCTTGATTACATGTCCTTCTCAACAGCACTCTACGGGGAGAGTGACCTCTAGGAGTGGCAGTG
ACTGCAGCGTTATCCTTGTAGAATATTGACAGTGGGGGAAATTATTGCTTCTTCAAACCCCTCCAAACTCATCAATAGA
TCATTGTCCTTCATATGCAGCGTTCAAACGTGTGCGAGATCAATAGGGCTTGACTACCTTCAGAATTTATATTTAAAAG
ACAAAACAAAACAAAAAAAGAAGATATTTTCATGCAACATTCACAAAGAAAACAAACTTTGAATACCCTGTTTCATTGA
ATGCCATTTAATTAATTGTAAGAAATAGTTGAACATGTAATGTCTTATAGCAATGACTCAATAGAACTGCGTGGGACTT
TGTTCATGGTCTGCTGTGCAGGACACTGTAGCACTGCTCCTTGCACGGAGCCTTAGAGTAGCTTGCTTTAAGGGGAAAA
AAGAGAGTGAGACTATGCATTTACAAGCAGAAGGCCCTAGTATTAACTTTCCTTTAAAAGTGTACGGCATGCTGAAGTG
GAGCTTAGTTTACCAATTGTACTCTAGAGGTGTTGATTGTAGTTTTTTAATAAATTTTCATAGGAATGTTAAGTACGAT
ACCCATGGAACACAAAAATAGATCCAGGTATGAGAATGTG
>00236 3 reads, 1138 bases
CCCATTACAGTTACAAAGACTAGTCTTACAAGTSGGTRRYACAGTCCAGCCGCTACTTCTGTTAGAGTGTTCGTGTATC
AGTGGTCGGTCTGGATACATACGCTGGATCCGTGGATCAGAAACCCAACCCTGTCGACAACGTGACCTCTCTCAAGGAC
ACTCAGCACCGTGCCGGAGCTGTAACTCCCAGGATGGTTGTAGCAGCAGACAAAGTCGCTGAAACTGTGGCAGTGGTTC
CAAGACCCAGCTATCAGGAGACGTCCGTCTACAGCTCGCTAGAGATTTCTGACCACAGACGCCACAGAGAACAAATTGA
CTTCCGACCAGTTCTCCACCCAGTTAGATACGCAGACACTGCTTATATTTACCTTAACAACACAAAGAAACGTTTTGTC
AGCAGAACGTTCTACGAGGCACGTGTGCGGCCAAGAACTTTCTCAGACACCACGTTCAACTATCCTAAAACTGCTGATG
AGCGCTACGTCAGTTACCTCGACTTCCACAACCATGAGAACAGAAAATGGTTCAAAACCAGCATCGAGATTAAAGCCCG
GAAGTTCACTTCTGCTCAGGTGCTGCGCTCACCCAACAATAATTATTTAGACGTTGCAAACACAAAAACAACCACCACC
AAATCGTTCTCATCGCCGGGGGTCAAGGACCTGGATCCCGCCGGTATTCCTGCTGGAGTCGGGTCTAACAATATAGGGA
GGAACTTAAGTCTCTCGGGAAGCCGCGGTCGGTATGGTGAGGCTGTTGAGGAAAAACTGGATCCAGGAGCATCTCAGAT
CTATATACCAAAACCACTCAATAGGTCTTTAGATGACCAATCGTTGGTCACAGGAGATCTGCTGCTACATTTTTCCAAC
AGGAAACTTGACTTCAACATGAACGGTCCATTGCCAGGGTATTCGGATGTTTGAGCCATCTAATCTTTTTTTTAAGGCA
AAATTATTTTGACACATGTATACGTAGTTTTAGAGATCATGTTTTTGTCCACACTTATTCATTTACACTTACTTGGCTC
ACATGAGACATGAGAACAGCAAGCAGCTATTAACTATAACTATAGGGCAATGCTGACATGGACTGTAAAAGTTGTTTGA
TACCATTATTTACCTGCAGTGTAAATTAGATC
>00237 10 reads, 1210 bases
CTCTACTGGTGGAGTCAAAATTCTTAGTTCCGMWKMWTAKMTCGAAGATCCAGTAGAGGCACTTATCGTATCATGCAAA
AGAAAAAGACATACAGAGTCACCAGATGTACAAAGCATTTTTTCCTTTGCTGGTACAATTAACTCAAAGAATGATCCTG
TGTCAAGACATATTAAAGAAGCTATCAAACAAAAAAATATTTCACACAAGTCTCATGTCAAGCATCCCACACGAAAAAC
TGAGCTCACAACAGAGCTTCGCAAGGAAAAGGAGCAGACCTCACGTGCCAACAGATTACGTATCACATGCAGTAGAAGG
ACTCTAGATGTAGATTTATTAGATAATGAAAATGAAATAAATGTAATAACTTCTTTCCCCTTAGACCAAGAGACGAGCA
GAAGTTTCAAAAAGAGAAAATATAATGGAACTAAATCCACTCAGTCTTGCCAGCCAGTCGAAGAAAACAAAGAAAATAA
CACAAATCAGTGTAATACAGTAGAGCATTCGAAGACAAGAGATGATTTAAATGACGCTTCATCAGTTGATCAGCATTTA
GCTAAGCAAAGCACAGGTCTTAAAGAAAATGATAGTCTAAAGGAAGATTTAAACCATCCCACTTCACAAGTCAAAGAAA
ATATGATTTGCATTTATGATGTTGAAAATGATGAAGAGGAAGACACTTCAAAAGTTATAGACCAACATTCACCTTGTGG
AATTACTCTCAATAACGTGCCAATGGTCAGCAAGAGGGTAATGTCACCTCCGAAGAATGAAAGTGAATTTGTTTATGAC
CTCTACTATGCACAAAGCAACCTCAGTGACCTTGACATGGAGGCAGTCTTAACAGTTACGGCCCTGTGCGATGACTTCG
TCAACGATGACAATGAGGACAACCCTGACCGCGACGTGGTTCACGATGACAGCGATGACAGTAATTCTGAGAGCAACTG
GAGAAATGATTACCCAGATGAAGATCCCCATTTCTTTGAGAATGAAGATGCAGAATATGGCTACACTGAGGACATGGTG
GATACCAACTTCCTTAATGATGATGATGGTGACCTTTTAGCTTACTGGATGGACACCAGATGTAAAGTTGATGGGAATT
CTGATCATGATGAGGATGAATATGAAAAAGATGAATGTTCTGATTCAAGTGAAGATGATTAGTTAAATAATTAATTAAA
CAGCATCTCATTTTTTAAATTAAAG
>00238 2 reads, 1056 bases
GTCGAGCTACTTCGGTAATTTCTACGTCTTWWAAGTCTAGGAGAAACAGAAATCAGGGACTCCATGTTAGCCAAAGCTG
AATATCTCTGTTCAATCGGAGACAAGGCCAATGCTCTTACAGAATTTAGGAAAACCTACGATAAGACTGTTGCTCTTGG
CTACCGCTTAGATATTGTCTTCCATTTGATAAGAATTGGCATTTTCTACAATGATCATGATCTCATAACAAAGAATCTT
GAAAAAGCTCAAAGTTTGATAGATGAAGGTGGAGACTGGGACAGAAGAAATCGGCTCAAGGTTTACAGAGGCCTGTACA
ACATGTCCATTAGAGATTTCAAATCAGCAGCTACTCTGTTCCTTGATACCATTGCAACTTTCACCTCTTATGAATTGAT
GGATTATCAGCAGTTTGTCACCTACACTGTTCTTTGTTGCATGATTGCTCTTGAGCGCCCTGAACTCAGGGAAAAGGTG
GTCAAGGGTTCAGAAATTTTAGAGGTTCTCCACAGTTTACAAAATATCCGCAAGTTTCTCTTTTCCTTGTATGATTGTC
AATATGCGGATTTTTTCCAAGCTTTGGGGCAAGTTGAGGACATTATGAAGTATGACCGTTTACTCTCATCACATTATTC
ATACTATGTACGAGAAATGCGTATCATGGCTTATGCCCAGCTGCTAGAATCTTATAGAAGTCTCACACTTAATTATATG
GCAAAGTCATTTGGTGTGACCATTGCTTTCATTGACCAGGAGTTATCAAGATTTATTGCTGCTGGACGACTCCATTGCA
AAATTGACAAAGTTGGTGGCATAGTGGAGACAAATAGGCCAGACAGCAAAAACTGGCAATATCAGAATTGCATCAAGCA
AGGGGACATTCTTTTAAATCGTGTGCAGAAGTTAAGCAGAGTTATCAACATCTAAAGCTACTAACAAAATGTTACTTTG
TGTCCTCAGTTTGTTATGTGCTCCAATCTGTATGAATGTTGGGTCCCAGTAGATGTGAATGACACATGGCCATTAAAAT
TAGACTGATTGATTTGCAGATCGGAAGAG
>00239 8 reads, 1223 bases
TTTGTGACAATGCTTTATAAAGATCTMAGWCTAAGTGTAGATAATAAACAAAAATAACTTAGTTTATTAACAACTATTA
TGTCTTGTTCATTAGTTTCATCCTGAAGAACAATTTGAACGTTTGATCAATTATTGAGTGTGCAGCTAATAACTAAAGA
GATGTTTACTGATTATCAAAGGCCTCATTATGGGAGTGGCAACATAAATTCTTATCCACAATACACACCACCAAACGTT
GGAAGTGATTTGCCACCTAGCCTCCCTGGTCCCTTATCCAGAGTAAATGAACAAGCAGCAGTAGCTCTATTACAGCATC
TAGACAGAAGTGAACTGCAGCATCTGTTGGACAATGAATCCAAGCTTCAGGGTCTTGTTGAAGATCTACCACAGCTTAA
GTCTCTTAAATTACATCATGATGAACTATTTGCTACCAACAAGAGTCTGGCAGAATATAATTTGTCCTTGCAGCCGAAG
CTTGAAAGTTTGAAAAGTTGTGTAGCCTCAAGCTATGACACGTTGAATAAATTGAAATCAGAGTTATCGGAGAAGAAAG
CAGTTTTAGACAGTATAGTAGATAAACAATCCTTGGACACCATACTTGCATTGCTACAGACTGAAACAGCTAAAACAGA
AGAAGAATCAGAGCAACTTGCAGACAGTTTCTGTGACAGTAACATCCCAATAGAAGAGTTCCTTGCTCAGTATTTGCCC
AAACGCACACTTGCCCATGTCAGGCGGATTAAAAGTGAAAGATTTGCAGAACTGATCCGAGACACGTCCCACAGGACCC
CCAACAATGTGCCGTCATAACAGCTGGCCCTCTGTGTCACAGCTCAACAACGCCCCATACCCAGCTTCATTACCCAGAG
GTCCGGCACCCAAAGCTCCTTTCATCCCTAGTGGTAACGTGTCCGCTGCCTACGGGACAAGAAACCCAGTGCCCTATCC
ACAAGCCGGAGGGTATGGTATGCCACAGCCAGGTTTTTATCATCGATGATGTCCACAAGGACCTGGTTTGATTTCCTCG
TTATTGAGACGTTTGTACAGTCCAGCTCTATTGTGTTTAAATNNNNNNNNNNGTCAGGGTTATTGAAAGTGCCAGTTTG
AAGGTATAGAAAGTTCAGGTTTTTTCTGTATCTGTGTCTCAACATAGGAGGTGGGATTTTTAAAAATTGTAAAAATTAT
TACAACATACCTACCAATAATCCCTAACCTCTTTTCTA
>00240 3 reads, 1074 bases
ATGTTTTAGTCGCCTACTGGCGSSTACAYGTGAGACGAGTTGCTTCCTATACTTATGAGAGCACACTAGAAATAAATGT
GGCTGAATACAGAGACTTTGGATTGCTTTCTTGTAATGCTTTTAACAAGTTGACCACATCACGGGACGTTATGTTGCTC
AATATAACATATCCACCCAAGATAGTATCTGCCCACAATACGTCATCACCTGTGTACTGGTGGCCAGGACAACGTGTCA
ACCTGACCTGTCGTGTTGATGGGAACTCACCCCCAGTCGTAACCTGGTCTACTCACGCACATGACAAGGAAGATGATCA
TGTGACAGTCAACTGCTCCAATATTGAAGTGGACCAGCGAGAAAATGAAATAAGCTCGACATGTTGGATTGATCTGCAT
CCATACCAAATGGAAAACAAGACTTATGATAACGAAACAAATTTCTCGTGTCATGCACAGAATCAGTTTGGCAAGTTAA
CACTCCATGAGTTTATAGTGAGGAGGGCGTATGTCCCCCCTCCTGTTCAGTTTCACCTAACAAATATCCACAACAACAT
AGCTGAGTTGTCCGCGCAGATTTCCAGTGACCAGTTTACCCTGCCAGCAGTCAATATACTGGTCACAGTCAAGTGGGTG
GACACAGGCAGGGAATATGAGAGATTGGCAGATGTTGGTTTCAATGGACAAGCAGCAATTAAATTACCAGGTATTGTAG
AGAACTCTACATACCTTGTATCCATGTCTGCAAGAAACAAGGCTGGTTATGGACCCTCATCAAGTCTGATTATATTCAC
AGATCAACAAGTGACAACCACAACAATCCAACCTTCAAACCTTGTCTTAGTGACATCACTTGACAACCCCACCTCTGCC
ACGAATTGGACTGATGGTAGAAATACGACATCAGTGAACACAAAGATCTTATACAAATTACAAGAAAATGGAACTCTTA
TTGACGTCATTTCAAATGTCTCTAGTCTTAGATACACTCATAATAGATCAAATTCTAACAACATTAAATCAAGATTTTA
TTGTGCATGTTTACTCTTRYATAWYRTAATAATACTCGTTTAAAATT
>00241 25 reads, 2345 bases
TTAATAATCGTCTATCTCTTTACAAAAGCCGGTGTGTAGTCGTGTACACACGTAGAAACTTTTGCAACCTGTCAAAGAA
ATAGTGAATAAAATAATTTGAAAAAAAAATAGATTTGATTTTGGTCAGCTTTCAGCCAGACAAGGCATCATGAAGAAAA
CACAAAGGTGCTTGGGGCTTACAATGGCTCATGCGCATGGCTCCGGAAAAACAGGACACCCTGCTGAAAATGGTCATTT
TAACTGTAGCAGCAGTTTTGTCATTTTCAACTCGGCTTTTCTCTGTTTTGCGATTTGAGAGTGTTATTCATGAGTTTGA
TCCTTACTTCAACTACCGTACCACAAGATTTCTCGCAGATGAAGGATTTTACAACTTCCACAACTGGTTTGATGACAGG
GCTTGGTACCCACTTGGAAGAATTATTGGAGGCACCATTTACCCAGGTTTGATGGTGACATCTGCCTTAATATACCATG
TGATGAATTTGTTTCACCTGACCATTGATGTGAGAAATGTGTGTGTATTTTTGGCTCCATTGTTCTCCAGCTTTACAAC
TATTGTAACGTTTTATTTCACAAAGGAACTCAGGGATGCCTCTGCAGGTCTTCTTGCTGCATCTATGTTGGCCATTGTC
CCGGGCTATATTTCCAGATCTGTAGCCGGATCTTATGATAATGAGGGGATTGCCATTTTCTGCATGCTGCTTACCTATG
CTCTTTGGATTAAATCAGTGAAGACTGGTTCCATCTTCTGGGGTGCTTTGTGCGCGCTTGCATACTTTTACATGGTTTC
CTCATGGGGAGGCTATGTATTCCTGATCAACTTGATTCCCCTTCATGTCTTGATGTTGATGATCACTGGTCGCTTCTCC
CATCGCATCTATGTGGCTTACTCCACAGTTTACTGCCTTGGAACCATCTTGTCTATGCAAATCTCATTTGTAGGATTTC
AGCCAGTACAGTCAAGTGAACATATGGCTGCACTGGGTGTGTTTGGCTTGTGTCAGATTCATGCCTTTGTTGATTTCCT
CCGGTCGAAGATGTCCCGTGATCATTTCAACATTTTGTTCAAGAGTTTGGTGTTGTTTGTGGGCACTCTTGTGTTTGCT
GCAGCTGCAGTGGCCACAGCTCTTGGCAAAATKGSTMATCATGGACTGGTCGTTTTTACTCCCTGCTGGATCCTTCCTA
TGCTAAAAACAACATCCCTATTATTGCCTCTGTCTCTGAGCATCAGCCAACCACCTGGAGCTCTTTCTATTTCGACCTG
CAGCTGCTCATGTTTTTGTTCCCCGTGGGTCTGTATTACTGCTTTGTGAAACTCACAGATGCCAACATCTTCATCATCA
TGTATGGTGTCACCAGTATCTATTTTGCTGGTGTGATGGGTTCGTCTCATGCTTGTGTTAGCCCCCGTCATGTGTGTTC
TTGGTGGCATTGGAATGTCAGCTGTTCTGACAACCTACATGAAAAACTTGGATAACCCCATGAGAAAAWGAAAAAAAAT
CAGCCAAAAAAATTGAATCCAACTACCCACTTAAGAATGAGATTGCTACCTGTGTTGTTTGTTTGATGACTGTGTTTCT
GCTTTATTACACCTATCACTGCACATGGGTTACATCAGAAGCCTACTCTTCACCTTCAATTGTTCTCTCAGCTCGAGGT
GGTGACGGCAGCAGAATTATTTTTGATGATTTCAGAGAGGCCTATTACTGGCTCAGACACAACACCCCAGAGGATGCTA
AAGTGATGTCATGGTGGGATTATGGATACCAGATAACAGCTATGGCTAACAGGACAATATTGGTGGATAATAATACATG
GAACAATACGCATATATCAAGAGTTGGCCAGGCCATGGCATCTTCAGAGGAAAAAGCTTATGAAATAATGAGAGAGTTA
GATGTAAATTATGTGCTGGTTATATTTGGTGGATTAACTGGATACTCCTCAGATGATATCAACAAATTTCTCTGGATGG
TTCGTATTGGAGGTAGCACTGATCGAGGCAGCCACATAAAAGAGTGGGATTACTATACACCACAAGGAGAGTTTAGAGT
AGACAAGGAGGGCTCACCCATACTTTTAAATTGCCTTATGTACAAAATGTGCTACTACAGATTCGGCTCTGTTTACACT
GAGGGTGGTAAACCAACAGGTTATGACAGAGTTCGCAATACTGAGATTGGCAATAAAGATTTTGAGTTGGATGTTCTTG
AAGAGGCATATACCACAGAACATTGGTTGGTCAGGATTTACAAGGTTAAAGATTTAGAAAACAGAGGAGTCTAATATTT
CAGGAACCTTAAAACACTACAATAAAGATAAAATGTTTTTTTTTTTGAATTTTT
>00242 3 reads, 1225 bases
TATTTAAAATATCTGATACTTTTCCGGAAAGATAGCCTGGACAGACAAACCTGTKTGGAACACCTTYGAAGTCCGACAC
TATGGAGTACCAGGGAAACTAGTGAGGATCATTCAGAGCTCTTATGAAGAAATGACATGCAGGGTGGTCCACGAAGGTA
GACTCACAGACTCCTTTACAGTCGAAACAGGAGTCAGACAAGGATGCCTCTTGTCCCCTTTACTATTCATCCTTGCCAT
TGACTGGATAATGGAAAAATCCACAGACAAAAAGAGGAATGGGATACAGTGGACACTCTGGGAACAATTGAATGATTTA
GACTTCGCGGACGACATTGCACTTCTGTCCCACAACCAGCAACAAATGCAGGAAAAGACAAAAGACGTAGCCACCTTTT
CGGCACAGCTTGGCCTCAACATAAATAAAAGTAAAACAAAAATCATGAAGATAAACMCATCCAACCATGAGCATGTCCA
ATCTGGCAGGAAAGGCACTGGAAGAAGTGGAGTCCTTCACATACCTAGGCAGCACCATAGACATTAAATGGCGGATCCG
ATGCAGATGTAAGGGCTAGGATTGGAAAAGCTAGATCAGCATTTGTATTATTAAAGAAAATATGGGAGTCGAAGGAGCT
GAAACTGCAGACCAAAGTCAAAATCTTTAATACAAATGTCAAAACAGTCCTCCTATATGGTGCAGAAACTTGGAAAACA
ACAGCGAGCCTTACGCAGAAAGTGCAGACATTCATAAACACATGCCTTCGAAAGATCCTGAAAATCAAATGGCCAAATA
CTATAAATAACAAAGAGTTACTAGAAAGGACACACCAGGTGCCTATTGATGAAGACATCATAAAAAAGAGGTGGAGATG
GATAGGACATACGCTCCGAAAACCCCCAGGTAGCACCACCAGACAATGCCTAACATGGAACCCACAGGGAAAGAGAAAG
AGAGGAAGGCCAAAAAATACATGGAGACGCGAGCTAGAGGCTGACATGCAAAATATGGGATACACCTGGAAGCAATTGG
AGAGGAAAGCACAGGACCGTGAGGAGTGGAAAGTTCTTGTAGACGGCCTATGCCCCAGACGGGGTAGAAAGGCATAAGT
AAGTAAGTAAGTAAGTAGTATCAAATACGACACCTACTAAGATGATTAAAAGTAAAAGACAAGTTGTAAATAATTAAGG
ATATCCATGTAAGCATTCTTTGTTCCTGCTGTTTACAAAT
>00243 7 reads, 1247 bases
ACCCTCCATTCCGACCGGGAGACWRTWAWKTCGACTCAGGAAATTTATAGCTGAAGGCTTTATCTGACTGTCATCAAGG
TGAAGAACTCTTGTGTCTCCGAGATCAAAACGAGTCATGTCTAGTCTTTGAGATGACATCATTGAATCAGCAGTGTCAT
CAGCCGCCTGCAAGTAGGAGGATGTGTCGTTCAAGTCTTCCCTATGACTTCTTCTCTTTTCTTTCAGGCGTTTTTCTTC
TTTCATTGACTGCTCCTTTTTCTTTAACTTCTCCAAGTCCAGGGCCTTAAATGGGTTTCCATCAACAATATCCTCCTCT
TCACTCTCCTCCTTCTTCTCTAGACCAAGTGCAGTTCTCTCAAGGTCCTCTGCCTTTTCTCTCTCTTCCTTTTGTTTCT
TAACTCTGGCCCTACGCTCCTCCCGTTCTTTGTCCCTCTTTTCCTTAGCCTGCCTCATATCCTCTTGTATCCTTGGCTC
TAATGTGCTCCAATTGGATCCAATATTCCCCAGTAGCCAAGTGAGTCCTTCTTGGATCTCTTTGTCCATTTTAACTCCA
ACTCCTTTTAGGGCTGACACCATTACCAGCTTTGATGGACATTTGTTGGCATTAACAACTTTATCTAGGTCAAGGCCAT
TGACCAAATCCAGTTCTTTCATGTGATCTTCCTTGTCCACTTTGTTAGCCAGAATTAGAACAGGTTTGCCAGACACCTG
TGTATGTTCTAAGGTTTCCCTGAAGACTTCCTTGGCTTCTAACAGACGATCTTTGCTACTGGAGTCCACAACATACATG
ATTCCAAACACTTCTCCAAAGTATGTTTTCCATATGGGCCTTATGTTCTTTCCTCCACCAACATCAAAGAGACTAATGT
CAAAGTTGGAATTAGAGAATTTGGCATTGCGGAATCCTACAGTCGGAGCTATATCAGGGTATATTTGCTCCCCAGCAAG
CACACAGGATAATGTTGTCTTCCCAGCATTATCCAGTCCAACAATAGCTAAAGTTACAGCTCTCTTTAGCTCCCTTTTC
TGTTTGAACTGCGAAACACAATTACCCATTGTGTATGTCTTGTTACTTCAGCTGCAACTTATGACTTATTCATCTCGCC
CAGGCCAGGGCCAGGGATAGTCAAGATGCTTGTGAGACTTTCACTTGGCACTTTATTAAATTATAGACATAGTTATGGT
GAAAATTGACTACTCGGACCGGGCCAAATGAGGTCATTCACAGCCGCCATCTTTGTTGCTAT
>00244 11 reads, 1374 bases
TTTTTGTCGGGATTACATTTATTTCCAGTTGACAGATATTTCTTCTAAAACCTTTTTGTGTTAAACGTATTTCACAACA
GATATTTCAAACGAAAATTTTAATTTGATAAATTGTCCGCGAGTTGCAATGTGAACACAGAAGAGCTGCATGCGGCTCG
TGAGACACAGTTTGGCCACCATTAAGTATAGACATTGCAGCCACATTTTCACAGGTATCAGGGCGCACTTTTTCTACCT
GGGTAATTGCATGGCAACTGGTACCATGGTTCCCGTTGACAGGCCTATTTGCACTCACTACGAAAAGATTATGATCTGT
CTATGATCAACAGCTTCCTGTTGATGAAAAGTTCCAGACCAAATGATGCCTTAGACTCTCCTGGGAAAAATAGTCTGCT
ATTTAAAAAGGCTGTTTTAGACCAGCTTTTGACTGGAGCTATAAAATCCAGACAACTTAACACACCAAGTGTCTGGGAG
ATGCAGCCCATACAGTAGCCAGCATATTTCAACATACAGGACGTGAACATTGGTGCTAACAGTGCTCCATTGATAGCAA
YAAGATTGACAGCTGTAGAACTTCTACAGGTAATGTTTTTCCAAGTAAAAAAAACATCTCCATGCGTATATCTGGATCC
TTGCGAATGGTATTTGGCTTAGCATGATGTAAATAGTGACGGTAATTCCACCATGAAGAGGAAACTCCCTTGAAAAAAT
TCAGCAGAAATATATGTATAACATGATTTACTTTAGAGGAGCTGAACACTGAGAGGTGACCATAGTCATGCTGAGCCCA
CCCTGCTTGAGCCTGAGCAGAGACCAGGAATAGAGAAGCTACTAAAAGAGACAACCAAGAGGTACCAAAATAGTAGACA
GTGAACCATCCTAGTAACTCAATGGCAAAAATGTGCAACATAATAAATGTGAAGAAAGGAATACTGGCTTTGAACAAGC
CCATATCTTCCACAGTTCGTCGAATCTCTCTAAAGTCTTTGATCAATTCACTCTCTTTGTTTTCATCCTCTCTCACTTT
TCCTATTCGAAGAGGCCTTAGATATTTACTAACTGTTTTTTTTGTCATTATGAAATGCAATCCATGCATCCGTAGAATC
TTGCCCTGCCTGATTTGCTATTAATCGCTCTCCACCTGGGTGTTTTCTGGACCAGTTGGTAACATCATAAACATATCCT
TCAATAACAATCCAGCTGTCGGATTTGGACACATGTTTTCTGATTTCGGCCCAACTGTACACGGGCAATGTGTCGTTTG
CTGGTATACCTGATTTGCACATATCTTTAAATGTAAAGGGTACTAACTTAATGCTTATTAAATCAAAAGATCAATGAAA
ACTTTAAAAGTGAGTATGTGGCGAATTCAAG
>00245 2 reads, 900 bases
ATAATTGATCATTGTGTCAGSWSWWSWSWWCTCTATTCTATTACTCATGACGGTGAATTGAAATACGGCACACAATTAC
CCATCTGGAACTGAGATTACTTCAATAAAAAATGGGCAAAAAATCAGCAGTTACTGACCAACCCGGGAATCAAGTTCAG
CTGATGCCCTTCCCAGGCAGTTTCCAAAATTGTCCGCCAGGATTAGAATACATGGGGGCGGTCGATCAGCTCATCTGTA
AACAGGAAGTCAGCATCTTCGAATTACTCACTGGATTTGAAGCGAAAAATAAATACAGAGTTTTTAACAGCCTCAATCA
GCAAGCTTACTGGGCTCTGGAAGAGTCAGAACTGTGCAACAGACTTTTTTGTGGACCACAGAGAGGGTTTGTCTTCCAT
ATCGTTGACAACAACCAGCAGGATGTGTTGACAATCGAGCGACAGTTTCTCCATTGCAAGGGATGTTGTTGGTGTGCTG
ACGGCTGCTGCAAGTATCCTATCTACGTCATGAGATAAGACAGGTCGAAAACTGGGCATGATACGAATGATGAACTCGT
GCTGCAAGCCTCACTTTGGAATCTTTGATGAAAACGAGGCGATGCTGTACGAAATCTGGGGACCAACTTGTCCATGCAA
CTGTGGAGCATGACATTCCATTTCCAATTCGTAGTGTCAAAGACAACACAATTGTTGGAAATGTGAGTAAAGTTTGGGC
AGGGACTCTCAAAGAAATATTCACAGATGCAGACACATACTGTGTTACATTTCCAATAAATCTGGATGTAGCTCATAAG
GCTCTGWTGTTTGCTTGCATCTTCCAAATTGACTTTGCTGTTTTCGAGACACAAAAGAACCAGTAACCAAAAGTTCAGG
AGAATATTATGAAATGACAGCTACGCTTCCA
>00246 5 reads, 1024 bases
TAAATTGTGTTGTAGGATTGAGGTCATTTAAAACAACACCCTAACMGCTCATTTAGCACAACATCCTAACATGTCATTC
AATACAACATGCATTTTTGCCATTTTCCTCATACGTTCTAAGATTTCATTTACATAAAACAACCCGGAAATTCATTTAC
ATCAAACATCCTGTTAAGTTCTTTATATGATACATCCAGATCGATCAAAAGTCACAAAAATAGTTAACATATGCAGTAT
AGAATTTATCTGTATGTAAAAAGTTACAAATTTATTAACATTTAATAATTAAGTACATCTTTACTTTTAAAGTTTTGTC
ATAAATCATAAATTATTCAGCTATAAAAATCAGATGAAGTGATAAACACTGAAGTTTTTGCACAATGAAAACTTGACCC
AGTAAAACTGATACACACAGCGGTGTAGAGAAGCTAGCACTCATTCAACTACAAGAATGTTGTATACAACAATGATCCT
TTTCACATAATCATGCATAATCGTCTATGTGGATAATAGGCGCACACACCACCTTACACAAACAGCCGCGAGCACAACT
GAAGCACACAAACCACAAACACAMACATGGATGCCAGGGGTCGCTCAGCCCCGCAGGTACTCGGCGAAGGTTCGTCCAT
TCCGTTCCTCTTGGCCAGGTCACACTTGTCCTTGTACAGCCCCAGACAGGACGAGTACATGAGCACGTGACCGATGTAT
GACTGCTCGTGAGTTCGATGAAACATGTGAGCCATTGGACCTCTGGCATATATAACGACATCTTCTCCTCCATGAGTTT
CATACGGCATTTGTAGACCCGACGGCTGTTGGAAATCTTTACCCGTCGTGTCGACGCCTGTTAAGTTCTCCCTCCCAAA
TTTCGGGCCGTTCAAATATCCGAGTGTCAAATAGGGCATCTTATCGTTAGGAGCCTCACCGTCACCAACGTTGTCAACT
GTGGCTAGAATGTTGTTTCCCCTTGAGGGATATCCAGCAATGCCAAACACGTGMKTASTGGTCAGCTGTGACCACG
>00247 2 reads, 1329 bases
CTGTTCGTTTTCCCTTTATTCGTGAAAAGGAATAAATCCTACATTATTAWTAATAATTKTAACTTAKCTGTTGGCTTTA
CAACAGTGGAAGACTTCATCAATATCAAGCCTTCAGAGCTAAGTGCAGAGGCTAATATCACAGCACAATGAAGCTCTGG
ATGTTTTGAAAACACTGTTTGAAGATGTGAATGCAGCTGTAAGAAAACAAGTTACACCTGTTTCAAAGTCTGCCTTGGA
GTTGTTGAAGGAAGAACAGGAACTTGGGTCCATTGTCACATTTTGTGAAAGTTTAGATGACATCCTGGGTGGTGGAGTT
CCTCTCAGAAAGATCACAGAGTTCTGTGGCGCACCGGGCATTGGTAAAACACAGCTGTGCCTCCAACTTGCTGTTGATG
TGCATATACCATCATGCTTAGGAGGAATGGATGGCGAGGCTGTTTATATTGACACAGAAGGAAGCTTCATTGTGGAAAG
GATGGTGGAGATTGCAACAGCAACAGTAGAACATTGTCAACTAATAAAGATGAAGGAAGATGGAGATAACTCAGGACTA
AATTATTTTACAGTAGATAAAATCTTAGCTGGAACACACTACTTCCGCTGTCAGGATCACATAGAACTAATTGCGACTG
TACATTTGTTGTCCAAGTTTTTGACTCAACATAATAAAGTGAAGCTAGTGATAGTAGATAGTATTGCCTGCCCTTTTAG
ACAAGACTTTACTGACATGTCCCTTCGTACAAGGCTACTCTCCACTCTAGCTCAAAGCTTCATTAAAATTGCATCGCAA
TTCAATATTGCTATTGTTCTAACAAACCAAATGACAACCAAGATCACGGCTGGATTAGGAAGTTCTCACTTGATCCCTG
CATTAGGAGAAAGCTGGGGTCATGCCAGCACCATTCGAATCATCTTGTTCTGGGAGCACAACCAAAGACAGGCTTTGCT
GTACAAGTCCCCAAATAAACAAGAAGCAGTTTGTTCTTTTCAAGTGACTCTTGGTGGAGTGCGTGACGTTAAAAGTACT
GTCATGAGTGCTACGACAAGCTCAAACTGCACTGCAACATCTGCTAATGCCAGTGACAAAAGGCTGCTTGCTAATATCA
GTTCTGAAGTGGCTGATCCCCCAAGCAAGAAACAGAAGAATTGTGATTAGTTTTCAGGGTGTGTTTGAAGCATTACCTG
ATGATGTATGACAAACTAAACTGCTCAGGGAGGATGTTTGGAGATTAATTGTAAAGCTAATGTAAGGTAGTTATTTTAA
AATATTTTATGTGTAAACATATTGATGGATAAACATGACCTAAATATTCAGTGATCTTTTGCTTA
>00248 2 reads, 933 bases
TTTTTTTTTTTTTTCCCTTTTGTCCCATTAAAACTGACTACCTCAAAGAAAAATTGAAGCAATAGTTAAATAATAAATA
CTTAGAAATCTTCATTTTTGTGTTGGCTCRAGTWATTAATGGCATCAAATATTTCAAAATTCTTTGAGTATATGCGACT
TATAGGACATCTCAAACAAGTGGAGAGAACTGGATGGGTTCGCAAGAGTGTAAAAAACCCAGAGAGTGTGGCAGAGCAC
ATGTACAGAATGGCTATGATGGCCTTTGCGCTTCCGTCAAATTCTGGTCTTGATCGAGATAAATGCATTAAAATTGCCC
TGGTCCATGATATGGCAGAAAGTGTTGTTGGTGACCTCACTCCTTGGTGTGGAGTTAGCAAAGAGGAAAAAAGCAAGAG
AGAAAAGGATGCCACACATCATATGTCCAGCTTAGTATCAGAGGAGGCAGGAAAAGAAATGTATCAGTTATGGCAGGAA
TATGAAGATCAGTCCAGTCCAGAAGCCAAATTTGTGAAAGACCTTGACAAGTTTGAAATGTTGTTCCAAGCCTATGAAT
ATGAAAACCAGCTAAGGAAACCCAAGAGTCTCCAAGAATTTTTTGATCATACGTTAGGTAAGTACAAGTTTTCTACTGA
ACTGGTCAGGGAGTGGACCAAGGAACTTGTGTCAGACCGTGAGGACTCGGAACCACTGAGAGGGATTCCTGACCCAAAG
CCTGACAAGTCCAGTCTTTCCTCGTCTCCTCCTCTGTTAAAGAAAAGAAAAGTTGAGCAAAAGTCAGAAGAAGCCCTAC
ATTAGTTGAACTAGTCTTATTTATTATCTTGGTCCTTCTGTTATGTGGATTACATTTCATAACACATAGGAGAAATAAT
ATCAGTCCACAAAAATATGGTATTTGTATATATGTACATAGTATACAAGTTTTGTACAGAATGT
>00249 7 reads, 1072 bases
GTAATTAAAGAATGTGTTTAWSATWWRYRYAGCCGTATCTCTTAACGGAATTCGGTTAATAATTCAATTATCTAGTGTC
TTTTTTCAAATWATAGTTTGAAAGCTAGAAAATGAATCGTCTGTTTGGAAGAGGGAAGCCAAAAGAACCACCCCCTAAT
CTCAATGATTGTATTTCAAATATTGATAGTAGGGGAGAGTCCATGGATAAGAAAATTGCAAGGCTTGATGCTGATTTAA
AAAAATATAAAGATCAGATGAAAAAGATGCGCGAAGGACCTGCAAAGAATCAAGTCAAACAGAAAGCTATGCGTGTCTT
GAAACAAAAGCGAATGTATGAAAATCAACGAGATCAGTTAGGTCAGCAGTCCTTCAACCTAGAACAACAGAATTATGCA
ATTCAGAGTTTGAAAGACACAAAAACAACAGTTGATGCTATGAAAATTGGTGTCAAAGATTTCAAGAAAGCTTACAAGC
ACGTAAACATTGACCACATAGAGAACATGCAAGATGATTTAGAAGACTTGATGGAACAGACCAATGAAATTCAAGAAGT
GATGGGTCGGAGCTATGGCATGCCTGAGCTCGATGATGATGAGCTTGAAGCTGAACTAGATGCGCTAGGCGATGAGCTG
GGGCTAGATGAGGACACATCGTACCTCGATGATGCTGTTGCTGCGCCGTCTGCTCCAACCAGTGAGCCAGGAGGGGAGA
GCAGCAGGGGCGATGTACCAGTTGATGAGTTTGGCCTACCACAGATTCCACAGGGTGCCAAATAATACATCACCAGTGC
CACTTATTTATCACCATCATTTTCTGCTTCTTTTTCATTGTCATCTCATGTCATCATTGTTATGATCAAAATTCAGTTT
TTTGGTTTCATTTTATATATATTAAGAAAATCATTATCCGTGGCTGTAATTAATCGTTGTTGATTCTAATCTTTTGTAT
CTGTGCATGACTTGTCAGCGTGTGTGTGGGACATCCCAAAGAAAGACTTTAATTTTAGATCATATATCCATTTCTATTT
GTTAAAGTTTTGTTTTTATCGGAAAACTTAGAACATCAGTTTTTA
>00250 2 reads, 1072 bases
TTAAATAAAACGTAAAGTGCCAACACTGAGAACATTCATTGTAAACAGAGAAAGTCAAAGTTTGTACCTAAAAATGTTG
ATTGTACTGTTTTCACCATTTACAAAACAATCTATAAGCTTTTGTAAAAAGCGATTCAAAATGAGATCATTCCAAAATA
TATTAGAAAGTTTCAAGCACTCTAGAGATTTGATCAAGAATCTTCACTGCAGCGCAGGATTTCAAACCAAGTTTACAAC
TCTTCCAGGAGAAGTTGACCGCTACCAGGGAATATGGGTTGATTTGACTCATATAGGAGACCATTTAATTGAAAAAAAT
ACATTTTCCAGCAATTTAGAAGCCTCCATGAATCTTTGGAAGACACAAGGCATAACATCAGTTTGGTTAAAGGTGTCTA
TATCTCAGAGTGACTTAATTGGGGATGCTGCCAGGCAGGGCTTCACATTTCATCATGCAGAGGGATCAATGGCTACTCT
TAGCTTGTGGATGGACCAGTCCAAGAAGACTAAAATTCCTCAATTTGCAACTCATCAAATGGGTGTTTCAGGTATGGTG
ATAAATAATGAGACAAGAGAAATACTTGTTGTGAAAGACAAAAACAGACCATATCAACTATGGAAGTTTCCAGGGGGCC
TCTCTGATCTTGGTGAAGATATTGCAACCACTGCAGAGAGGGAGGTGTTTGAGGAGACGGGTGTCAAAACAGAATTCCA
GTCAGTTCTCGCCTTTAGGCAACAACACAACAGCCCTGGGGCCTTTGGTAGATCTGACCTCTACGTTATATGCAGGTTA
AAGCCCCTAACCTTTGACCTCCATCCCTGTGAGGAAGAGATTGCTGCGTGCCGATGGATGCCAGTGGATCAACTGAAGA
CCGAAGTCCAAGCTACGTCACTGACCCACACCATGGCCGAGTTGGCCATTCAAGGCCTGGAGCACGGCTTTAGTCACGT
GGACATCATCTCTTACCAGATGTCTTCCATTTACAAAGGAGTCACATTTCACATCTTTCACCGAGATTGGAAATAAAAC
GGCGCGTTCAAAGTAAAAAAAAAAAAAAWARTAGGGATAACAGGG
>00251 3 reads, 1039 bases
TAAGAAAATAGAATGTAAATTTTACAGTWWTATAATGTTTAAAAATGAGGTGAATATTATAAATCATCGCCGATATCTG
TAGCGCTTGAAGTGGAACCAAAGCTGGAAGATGTTGTTATGGAACTGACACCTGAAGCCTCTCTTGTATGAGTACTCCC
ATTCACGGTTGACAATCTTGAAGGCAATATCCTCATAGGGTGGACCTGCATGGAATCTTAACATAGCAAAGTCTTTGCT
GCCCTCCAAGGGTGTAACAAAGTATTCTGGTGTCTTGGCTTTGTCTATGAGGTCAGGATAAAAAATATTAAATTTGTAT
CCTTGGACAATCTTTGGAGGTGGGTTGTCAATGTCGTAGTGAGTTTGATTGTACTTGTTCCATTCAAAACCCGTATGGA
CCCTGTTGAAAAAGCGAGGCTTGCGAGGACGATATTTATCAGACCACATGAAGGATTGTTGTTCTAAGTTTAACTCAAC
ACTAAATTGTGCCTCATCCAAATCCATTCCTTCTCTGGCTTTCTTTTCAAACTCCGTCTCTCCATCAGTCCTGACTCGG
CCTGTGGCGTACACTTGCTTCCTGGCTAATTCAAGTTTCTTTGCATCATCTGCCTCATCATAAATAACAGCATCAATGG
TCAGGTCTTCTGCTTGGAACATGCGTGGGGAGTATCCCGCCTTAATGTATTCTAATTCCTGGATGTCCTCCTCTGTCAT
GACCACTTCTTCCTGCTCATCTTCTTTTTCTGCTAAACTTTCCTGGTTTTCATCGCCGTCAGGTTCTTTGGATGATCCA
GGTTTAGGTGATTGCTGCTGTTTTGTAGAGCCCACAGGATTAGATGAGGTGGCGTCATTTGAACTGGATCCTGTTTTCT
CATCTTTGACGACAGGAAACAATGGTGCTGATTCTATTCCTTGCTCTCGCTTAAGYTTGAAGAGTTTTTGCCTCAGTAC
TTCTTGATGTCTCTCCCTCAGCCTTGTCCTGGCCTTGTGAGCTTTCAGCTGCTGCAGCAGTGACTCCCAGTAACCAATA
TCAATTCCTTTC
>00252 4 reads, 949 bases
GTGAGAAAAGTAGTAGTGACGACAATAGTACGTCATCATCATCACTGTAAATATCACTAGGCTTCATTTTTTTCTGTGC
CTGAATCTGCTCGGCTTTCTTTTTTTGTTCTTCTCGTTTAGCTTTTAAGTCCAAAAAAGCAGAGGTCTTTTTGTTATCT
TTACGCTGTTCAATATGTTTACGCCGCTCTTTACTTCGTTCACTCACAGTAGGTAGCATTTGATCTGACACAGGTTTAG
ATTTTTCCTGCTCCTTTTTAGCTTTTTTCAACTTCTTTTGGATTTCAAATCTCTTCTTAAGGGCTGCACGTCGCTCCAT
GCGGTTGAAGAGCTCCTGTTCTCGCTCTTTCTCTGTCATTGCTTCCAGTCGTTTCTTATCCTCGTCATCGCCAATTAAA
TTTTCATCATAGCCATCATGAAATTTGTCTTCATCTGAGTCTGAATCATCACTGCCTGAGTCAGAAACCTCACCTTCCT
CTGGCTCTGATTCAGATTTCTTTGTTTCATCTTCCCCGCCACTGTCTGAAGAAGAAATAGCAGTCAGCTTTTTGTTGGG
TTTTTTTTTTTGTCTTCTTCTTTTTGGCCCCACCTCTGCCATTGACTGTCCAATCATCATCACTGTTTGAAGTCTCCGA
GTCTGAGTCATTTTGGGCTGCACTAGACTTTCCTTTAGCATCTGAATGCGATTCTGAACTTGCCCTTCTCCTTTTTACA
AGGGCTCTGAGACCTTCGTCCAAGTCTTCTCCTCCACTTCCACTTTCGTCGCTATCTGAATCAATCAAAGCTGCGCTCT
TTTTGCGTTTAGACATTTTATTTTGAAAATCTAAATAATTCAAACAAATTAAATTGTAATTATAATTGCGTTCCGTTAA
GGTAAACTTTCATTTGTAAATTTATGTAACTATCAGCCTCTTTCATAGGTTCGCTTAGAACTGAAGCACCATGATAATR
T
>00253 2 reads, 1031 bases
AGTAGTAGTAGTAGGAGAAGACTRCAATGTTACACTAGCATCATCTGTCTGAGAAAGGCACTTTTCACATGTGCATTTG
AATAAATAATTCTCCCTTAAGGCCTTCTGCCGACTGTGTCTGCTTCTCTCCAGATCACAACATCCTAGATAGCTAATAG
TTATTTCCTCTTCTGGTGCTATATCTCTTAGAGCCACCATAGCCAATGTATTATTACCATATGGAAATGTGATCTCTGC
ATTAGGAACACAGCTGTGGTTACATGAACTTTGTAACTGGTACAATGCAGAACCCTCACAATCCAAAAAATCTCCTGAA
ACTTCTTCTAATTGCTCGTAAATCTTTTCTATTAAATCATCTAATTGTTTCCTTTCTGAATCACCTAAAGGTAGTTTTT
CTGTATTTTTTACCCATCTGCTGAAAGAACTTGATCCAATTCCTTGACCATTTGTGCCAATTAGTGCAAACAAAGAATT
AAATCCCTCTGAAGTGAACCATTCTTGTACAGACTCCTCAAATAAAATATCTGTTAAATGCGTTCTCAGCACTTCTCTT
TGTACCTGGAATTGTTCCCCAAGTAGTTTGTGTGCAATTTGTTCTTGTTCATTGAAAGCAGTTTTAACAAAATTTGAAA
ATGCTGAAATAACTTTTCCTTTATCTTGGGCCTGTTTAACCATAGCTATAATTTTAGCTATTAGCATAATGCTACAAGT
CTCTGGTGGATAATGAAAAGACCTCCATATTTCAAAAAGCTGATTTAATGGGTTTTCTCCATCATTATGGGATGATCCT
TTGCATAAAACCTGATGATACTGACTAGCAGCAAGGTCACGACAACCAGAACTACAGTAAAGTATCTGACATTCAGGGC
ATTGAGAAATCTGAGAAGTATCAAGATCACAGCATTCAGGGTAGGGCAAAGAAAGCTCAGGATTATTGGTCAATCTTTT
TGCCATTTCCTCTGCAGTCTCCAGTGACCTGAGACAATATTCACAGGCCAAATATTTATATAGTTCATTCCAAGAGAAC
TGTG
>00254 3 reads, 1156 bases
GCTGCGAGAAGGCTAGAGTCTAGACCTTATGACCAGTCCACTGCAAGAATTTTATCCTCTTGACCAATCAAATTATAAA
GTGGTGCTTTCGGGCTTCTAGTATCCCAGAGCTTCATCAACATATCATGAGAACCAGAAATAAACATGTGCTCATTAGA
TTTTGACCAATCAACACTTGAGACCCAGCCAGTGTGTGATGTATATGTACCTTTCATTTCTTTAGTTCGCAGGTCATGC
AGTCTCACATGCTTATCAGCTGATGCAGACACAATTAAGTTTGACAGTGGAGAATAAGCTATAGAAAAAAAAAGCCTTT
GATCCCTACCACAACTTGCTGTTTGCTCTGAGCGTGTCATGTCCCAGACACGTAATGTATGATCCCAAGAAGCTGTGCA
TACATTTGATTCATCCAACCAAGTTGCAGAGGACACAGCTTCTTTGTGCCCTGACATGGTTACTAAAGGAGTTCTAACA
GAAAATTTCTGGCTTATTCCTTTCAGCTTTTTCTTTTTTCTGAGATCTCCAGTAAAATCATCATTGGTATCTTCTGCCA
GTGTTGTCCCATCAACAAGAGACCACAGCTTTACCATCTTGTCCCAGGATCCAGTAACTATTCTTGCTCCATCATTATT
AACAGCAACACAGTCAACACTTCCAGCATGTCCTTTGCAAGCATAAATGCAGTCAACTTCTTTTTTAGACTCCTTCCAA
CGCCACACAAATAATGTTTGATCAAGTGACCCACTGACAAACATAGGTTCATCATCAGAAAGACCTTCAGTTTTAACCC
AAGCCACACATTTTACAGGACCAGAGTGTCCGGGTATGGTAGTTAAACATTTACCATCTCTTGTCCACAGCTTTAATGT
GTTGTCATAACAACCGCACAAAAGTAAATTCTTGTTTCCTTGCACGCAGCTAACCCAATCATCATGCACAAGTGATGTC
TCTGGACGTGGTGCTGYAAGTTTTTCTATTTAGTCTTGCGTAATAACTGCTTCTGGTGATATATTTTTTTCTTCAAGAT
ACACAGCAAGAGAAGTGCGTAAAAATTCTCCATCAATAAGGAAATCAAAGTCTACTTTTTCCTTAACATTGCCATCACA
CAAAACACTGTATATAATGTTATTTAATTCTTTTGTTGAAACTGTAGAAG
>00255 24 reads, 824 bases
TGACAAGTGTCGACCTGACTKWAAATGTTACCTTCAACTTCAACTGTTATGAAACAATTTTGGTCATTAGCTCCTTTTT
TAGCAATGAGCTAAGGCTCAGATCAAGAAGCTATCTTAACCTTTTCCAGCAGTATCTCAAAACAATGTTTTCCTCACCC
TAAAATTGTGTTCTATTCTTGTGATTCCTTTTGCAGCCTTCTACTTAAATACCATCTCATCTCAGCCAATACTTGATGT
GTTAGCGCTAAATCTTCTTCACAGTCAGGTGATGTGCTCTTTTTCCCCCCTCCTCTATCTACGCTGTTCATTTAACTTT
GTATTTCAATAATATTCTTCTTCCTGTCAAACTATCTTATTTCCACTATGTCCGTGTGCTAGTTGTTTAGACAAGTCAA
AATATTTTTTTTTTCAAAGTGCATCCTTTTAATCAGCATTTAGCATGATAGACACAGATCTGTACAGTACAAGTGCATC
ATGATCCACTCCTGCACATCATATTTCCATGGGGCCATCAGCTTAACGTGGTGTTCTACTGCTGACCAGGGTCATAGGA
CAGAGCACATCCAGGCCAGGCCACTGCCTCACACTGGTGCATTCAGTCAGCCCTTTGGTTGTAACTTGGTTTTATTTGA
TGCTGCGCTTGTCTAGCCTGACGAGAATGAATTTTGTTTGACTAGTTTGTTGTCAGAGTGTTTCAAACCTATGATTTAC
GATGAATGGGTTTAACAGTCAGTAACTTCAAGTGTTGTAGCTGAAAGTAAGCAAACTTTTTTTTTTTTTTWAGTAAATA
GTAAATGAACATAATGAATAAACTAAGCATTCRG
>00256 9 reads, 993 bases
GGATTCAGTTGAAATCGTGAWCGCAGTYAATTTTAACCTTTTTCTTAGGTGGTTCTGAATTTTCTTCAGGGGCAATAAA
TGACTTGTCTCTCTTCAGCTGTCTGTCCTGTTTCGACTGTTTCTGCTTTTGTTTCTTTAGTTCTGCCTTACGCAACCTT
CGTTCACTCTCCTTAAGGAAATACTCCCCTGAAGCAAGCTCCTTATCAATCTTTGACTCTGGCTGGGGTGGAGGAAATG
GTGTGTATTCTTTCTTCATCTTCTTTTTCAAGGGCTGCTTTCGCTTGTTGATATTCTTGCTTTTGTATTGTGGCAAATA
GGGCGCCCAATTTTCATTTCGCATGTCTGGATTCTTAGCCAAGTCATGCTTTTCCATAATGGTACGAATTGTGAAAAAA
GGATGAATATTTTTCATACAGTCCTCAACAATTTTTCGAACTTCTTTAAGACCTTTATGAGGCCCCAAAGCTGCCACTG
TGTTTCCCTGGACTGCAACGTAACAGTCAGTGAGACATTCAATCGCTTTCAACGTAGTTCCTCCAGGACCAATAAGCCG
TTTCCTTCTTTTCACAAACCTTTCCTTTTTAGATACCATGGAACCTATTTTGATAATATCACAAGCTACATCATCGTCA
AGAATCTTTTTGGCCTGTTCAAGATCAACACTACGAGCAAGAAGTGTGATTAAGTCTCTGGCTTTGATGATAATGTAAG
GATCATATGTCTTCCTAGTAGTTTTCACACTCAGACTGCCTTTGATTAAGTCCATCTCTGGTTCAACTCCATGTTCGTT
GAGGACTTCTTTCACTAAAGGCCACACTTTGGATAAATAGCTCTCTCGATATTTTGGAAACAAAACAGAGAAGGAACTT
TCTGATAATAATCCTCTTGGGTTATCTTCTTTTGTAAATGGTTTGTCTTTCCAACCTTCTGGTACAGTAAGACGATCAT
CCTCTTTTTTTGATGTCTTGAAAGAGCAACTTTAAAGCGAWTACC
>00257 2 reads, 943 bases
GATGTGCTGCGAGAAGGCTAGATTCACAWSAACATCTGCCATAACTAAAGGTAGGTAACTAACTCCTGTGCTTCTAAAA
ACTTCTGTTGACTTGTGTCTCTTATTTCAAAATTTCACTCATGTTGTCTTCATTTGTTGAATATATCGACTGGTAAATT
TGACAGGACACTGGCTGTCTATAAGTTTGATGTTGTCTATGGCAACAAGTGTGTCTCTAGAATTGGTTTTAGTGGACAC
AAACGAAACTTGTATTTCCCCTTTAGGCAAAGAGACACAGATGCTCTTCCATTTCTTGTGTTTATTGGCTACAAATGAC
CAAAGTATGCCCTTGTTTTCCTTCTTKGTGTCCCAGTACCGTAGTGCCAGAGTGTTGCGGTCACTTTTATGCGGCTTTG
GATTGTAGGCGAAGAATGAGAAAGCAATACCAAAACCACTTGAGTTGAATGCAATGGAATCCATAACAGTTCTGACAAA
TTGCTCTCTGTGTTCAACCATCATATACAATCCTTCAGTTCCTTTGGTAGGAGGTGAACTTTTACATGTGAGTAGAGAT
ATGGGACAGGAATGATGATGAACTTGTTTCCACTTTGGATAACCGTCTGGCCTGAGACGGTAGCCACACAGGTAAGCAT
CCTCAAAATCACATGACACGCTCTTTTTTACGTCACAAATACGTCCTTCGTCTGCGCCACCAGGACAATCAACGTTACG
ATCACATTTCTTTCTCAAAGGTATACACATTTTCTGACCTCGTTTACATTTAAATTCATCTGACCTACAGTCGCAAAAA
TGATGAAATGCCTGTGGATGACAATGTTCTTTGCCATCACAAATTTTTGCTACTTCCTTACATGAATAGTCATCTCTAC
ATATAATCTGTCCTTTGGGGCATGCACAAGGACCGCGGATGATGGAAACGTTGGAGAAAAGTAGATGTGTATTG
>00258 4 reads, 1301 bases
CATACCACAATGTGAGCACTATTTACTCAATATACTTCCAAAACACAAATATTGGACATACTTTTCTCCACATAACAGT
TAAAGCATTCTCTCTTTTATTCTGGCAATCATCAATGTTACGTAAAACTCAAGGGAAAAGCCAAGTGATTGCTAGGTGA
AAGGAGAAACCCTAAGTCTCCCATCATCTTCCCCTCACAAGACAATGTACCAGACATAAGCTGTCTAAAATTACATCTC
CATTTCATCCTCAAGTTGACCTCATTCAGTGTCATGCATTCTGGAAATGTGTTCCTGTCAAATGATGTTGAGATGACTC
CCTGTGTCCAATGTCGCCCTGGAACTTTTTTATTTTGTGCTTGACCTTGGGTGTAGGATCATAGGTTGGTTCTATAAGA
TCAGAGTAAAAATAATTGTAGAATACAAAATTGTAAACAATGATCCCGAAGCATGTCATGGTGGTCAGCACAATGTACA
CAGCCATGTGAGAGTTCTCCTCCTCCTGATAGGGTGTGTTCCAGAACTTTGAGCACGTCAGGAAAGAACATAAGTTCTC
CATCACTTGATTTTTCACAGTATCTGTTTCATTTTTGGTGTAGCCAGGAGGAATGCACTCATTAACTAGATTCTCACAC
TGAGAAAACAGTTCTTGCATGTCATCTTCCATGCACAACGCTATGTCCCAATAATCAGGCTGGGAAAAACCTGAGATTA
TGTCACAYCTGAAGATGTCACAAACATCTGCCAGACAAATGGCATCTGTGGTCCTGATTTGGTCCATGTGTCTATTTTC
AAAATGCCTGTCTAAAAAATACTCCGAAACAAAGGACTTCCCACAAAAATTACAAGTCCATCTGCTGGATCCTTCCAAA
ACTTTGTGTCCTTCTTGCAGAGAATACATATCTCTATCAAGCGAAAACTGACAATTAGGTGTTCGACATCATCTTAACA
GCTTTGAAAGCAGGATAAATTCTCTCCCTCACAATCTTGGCAACAATTCGTGAATTCTCTCGAGCGCAAATCTTTTCTT
GTGTTAAAGGAATTTGCATCAAGAGTGGTAACACAWCGTCAACTGTCCTTCACTCTACCATGCGGCCACGAAGACATGA
TGAATGTTGAGCTTTTTAAAGTATAGAGACCCTGGGCCTCTATAACCACAGAATTCTGGGGATAGCGTTCAACGTTATT
CGCAGAATTCTGGGGATAACCACTCCGTTAGTATTAGCTAGTATTAGGCAATATCAATTAGTATAAGTTAAATAAGTAT
TAAGCTTATTTAAAATTAACTGCTCAAATAAAAGCTT
>00259 4 reads, 1153 bases
AGTCACCAGTAAATTACGGCTAATAGCCCGTAGGAACATACAAAATGCATGGTTATGAAGTTCTGTATAGATCTGTTGA
TGCTGCATTAGTAGAAGGGTATCGCTCCTTTGATACTGCAGCAGTATATAGATAATGAAGCAGCACCTGGGGAAAGTCT
TTAAAGAACTTCTTCCTAAATATAATCTTCGAAGGAAAGATATTTTCATTATCACTAAATTAGGTCCTGGGGATCATGG
GAAAGGCAAAGCCATGGCTGCTTGCTTAGCTTCCTTAGAACGACTTGACTGCCATTATTTAGATCTCTACTTAATTCAT
TGGCCTGGTGCACAAACACTACTACAAGATGACCATCGACAGAAGCAACTCCGCAAAGAAAGTTGGCGTTGATATGGAG
GAAGCTTACCGCCAAGGAAAAATTAGATCACTGGGAATCTCCAACTATATGCCTAGACACATTGAAGAGCTCATCGGTT
ACAGCAATGTGAGACCATCTGTACTGCAAATTGAGTACCATCCACACCTGATTCAGAATGAGGTGAAGGAAGTATGTGA
CAAGTATGGCATTCACCTTCAAGCTTACTCATCCTTGGGAACAAGTAGTCACCATAACAAACTTTTAACTAATCCATTG
ATTGTGGAAATTGCAAGACAGTTAAAGAAATCACCAGCTCAAGTTCTGCTTCGATGGTCTATCCAACAAGGTGTAGGCA
TTATTCCCAAATCTATAAATCCAGTCCACATAAAGGAGAATATGGATATTTTCTCATTTTCAATTCCAAGTGATCAGAT
GATTAAGATTTCAAATTTGGACAGCCAGACCCATTATTGCTGGAACCCAGCCAGCATTATTTGAACAAAATAGACAATA
GGATTTCTTTTTCATTAGTCCCTAGAATGTCAAGCAGAAATTAAGTGGCATGAAGTTAGACAGCAACAAAGCTTATGTA
TAATTATACTCAAATTGTATGTGAACATAAGTAATTTTGGGATCTATGTATGACTGATAAAATTAATTAAATTTATTTC
ATGCCACCTTCCTGAACTGAAAAAGGGGATAATAACTTAAAGCATGTTTCAAAGAATGTCATGTTAGTTAACAAGTAAA
ATTAATTATAAATTAATGATAATGTAACTACATTCTACAAGCAGGAG
>00260 7 reads, 1067 bases
AAAAAAAAAAAAAAAAAAAAATTCTGACGSTGTACGTATTTATTGAGAACTGKTAGGAAGACAAGGCTTTATTGACATT
TGTTTTATTTGGTGTCAAAGTAAATACTTCTGACACTGAATTCATTATCTAGAGACAGGTGTTAGCACATCAGGGAACA
GCCTACACTAGGGCTACACTCGGCTTGAAGTAATGTCAGTAGTACAACTTGCTGGTGATGCACTTTGGTTATCTGCGGG
CTTGAAATAATGGTAGTTCTGAARTTTGCTCCAAAAAAGTGCCAGTGGTACACTCTATTATAGGATATTTGATTCAGTG
TGCCTTAACGTGCAGTTCTTGGAAGATTGGATCATGGCCAAAATGTTCTTAGTGGCTTGAGATGACTCAAAGACGTACT
ATTATAATTAATTGCTGCTTAATTTTAAATTTTCTATAAAACTTGTAACTTTAAGAAATAAATATTCAGGGTGATAGTG
TCAATGTTCAACGTTGTAAAGAGCAGTTATTTCAGTTATATATTACTCTACCTTCTATTAATATAAACGTTTTGTCTGA
TCAATAATCTATCATACTTCGTTGAATATGTAAGCGATATTCTGGTAATTAGTGTAGTTGAAATCCTTTTTTTTCTCTC
TCAAATTCATCATGGATGTTGGTAAAATTGTTTTTGGAACGGCACAAGAGATTGAAGCGCCTTGAAATCGGAGAAACCG
ACTGAGGACACGAGATCCAGCCTCGTGGCGGACCTCATCAACGTTTTCGACTCTAGCTTCCCCCGATGTCTATCCCTTA
AACTATGGTCAAGCCAGACAACAGATGTCCAGTCTGTAAGACTTTGGTCAAACGAGACAGCTGAAGTTCAGGAAATTAA
CTGGGTCCGGTGAGACGGCAAAGCCAGTTATTCGGCGATCTGCTGGCTAGCTGGCATGTCACCAGAGGCATTTGTCGGA
GGCTGTTGACACGGGTTGAAAAATGAGATCCTGTTGAAAAACCCTTGCACCATCCACGCCAGCCCAAGGTGAAAGACGT
CGATGTCAAGCATGATCSSSAKAGYRGTTCCGCAGGGATG
>00261 13 reads, 1168 bases
TTTTTTTTTGTAATGGTCTTTAWTMSTGWCAGATTGTGAAAAGAAAAATCAAATATTGTTGGAGGTCATCTGATAGGTT
TTATTTTATCGTATCCACCAAGCCCATTTCTTCCTTGTACTTGTACATTTCAGTTTATTGATTGATAAAGCTTTGGTTT
TAACACAAAAATGTTTGTAAAGATTCAGCATTACTGTCTGCCCTCAACATATGTACAACAGTGGAGAGTTACAATATTG
CATGTAAAGAGTAAGAAACACTACAGTTAACTTTTTTCATTACTTTTACAGTTAAAAGAAAAGTAACCTGTTGTAATTT
TCAAATGACAGTAATGGGCGTGTGATATGTGTTTCAGCTATCTGAAAGTTTGCTCTTGGGTGGCATTTGTAAGCATGGA
GTGAAATTGTTGGTTATTTTTAAATTATTATTTTATATGTATACACTGGGATAAACAAATGGTTTATGTTCATATTCTC
ATCTATCCTGCCTGCTAGATCATTGTTGTGGGACAATATTTCTTGGTTACACATGAGTTGGAGTGCTAGAAACTTGATG
GTTGTAAGCTGAACATGAAAATAAAAATGCTTAAACTGTAACTAACAGGTTGAAAAATTTTGGGTCCCCATTTTAAAGT
GTTAACCTACCTTCATTTTTTTTCTCAATAAAATCAGCTCTAAACATTAATAATCTAATTTAAAGCATTGTCATTATTT
GCAATATGAATGAATGTTTATATTACAACAGCAAAACAGTTTTCAAATCCTTTTACATCACTTAAAGCTGATACCAGTA
GTTGCAATTTAAAAATTCTAAGGCCATTTAATTTCTATGAACATTGTATATCAATTTCCTGAACATTGTATATCAATTT
CCTTTCTATTTCTATATATCACAAATATCAGCTACATTTATGCACATTCCAATTTTTTTTTTTTAAAGGTGCCCACATG
TTCCTTTATGCTGTGGAACTTATTCTTTGAAATGCTGGTTTCATTTTGTTTAAATAGCTTCATTGTAGGACAAAATGTT
CTGTTCTTCATTAGTCTTTTTTCTTCTTTGTTTTTGTAACTAAAGTGGTCCTGAGAAAAAGTGATGTGAAATACCTTAG
TGTGTATTTATTAAACATGCCATCATTATTTTTTGTATGAATCTTTTATTTTGTCAGTCTTT
>00262 12 reads, 1025 bases
AAAAAARMTAGGGWTWWYAKSCCTATTGTCCCATTATTACTACCCTGTGGTTCACTAAACATGCTGTCTTTACGTATTT
TAGTCTTGGCTATCGTAGTCAGTCAACTGGGCCTTACAGTTGGACAAGACGTGTGCAGAGACAACAACTGGAGCGGTGG
TGTCCACCGACATCCAGACCGCTGTGACTACTACGTCATTTGCATCAATTCAGTTGCGAGCCTTTACCAGTGCCTGAAA
GGTCTTATCTTTGACACAGCGTTGGGAGCTTGTGTTGAACCCAGCATCGCTTCTCCTTGCATCGACTCAACCAACACCT
GGCCAGTTATCACTGGAGACGTTAAAGATTTCTGCAACTACAACTTTTTGGGCACTGGGGTCCACCTGTACCCTGGCAC
CTGTGAGAAGTTCATCTACTGCACCAACTCGGAGACTTATGTCGTCTACTGTGCAGTGGGGCAGCTCTATGACCCTGAT
TACGGCGCATGTTTGGACGCTAGTAAAGCTAAGCCGTGCACTAATGATTCCAACCAGAATATCATACCTGGCAACTTTA
GCTTCTGTCAGGATAACAACTGGAAAAATGGGGTGCACCCCCACCCCCACACGTGCATCATGTACGTCGTCTGCAACAA
TCACGTGACAACTGTCGTGCCGTGTCAGCGGGGCTTGTTGTATGATATCCATTATGGGACATGTGTGGACTCCAAGATA
GCCAGGCCTTGTAATGATGACCCGTGGGCAAACATAACAATAGCCCCTCAGTGTCAGAACATCTCGGAGGGTGATATTC
TGTTCATCCTAGACTCCTCATCCAGTATCGGTTATCAGAACTACAAACTCCAGCTGGCGTTTGTGGCCAACTTGACCCA
AGCGTTCATCATAGGTCCAAACAACGTGCAGTTTGCTGTCATCATCTTCTCGGAAGATGCCCTAAATGTGTTTAGATTT
GATTCTTACAGAGAGGCCGAGACATTGATCCAGGTGAACATTTGGCACGTAAAATAAACCAACAGTTGTTCAAGATA
>00263 5 reads, 790 bases
CTGTTATCCCTATTTTTTTTTTYTTTTTTTATGGTTTTATGATTTATTCTGTTTTTAAGTTTGCAACAATATAAACATT
GTCATACGAGTAAATTCAAATTTGACACTTCGCACACATGACAATACATGCATAAATTTCGAACAATACATGTATGAAA
ATTAAAAAAAATACATGTATAAAACTTAACAATACATGTATAACATTTAACCACAACACATTTAGTTAGTTAATGTAGA
TTGAGTTGATTACAAGCCCGCGCCACCACGGCAAGCAGGAGATTTTCCAATATCTTGTGAGGTTTCCCATTCTTTTGGT
GTCTTGGCAACTATAGATAATGCGTGAATTGAATTGTCAATTTCTTCTTGAATAGCTTTATGAACAAGTTGATGTTTTT
CAAGACGTTTTACATTTTCAAAAGCAGAAGAAACTATGACAACTTTAAAATGAGACTCAGTTCCTTTAGGAACATTGTG
CATATAACTTTCATTGATCACATCCAAGTATTCAGGTTTTAAAGCTTCTGTAAGCTTTTTGCGAATAATATTTTCAACA
GGTTTATCATCGCTCATTGTACTTTTTACAAATCCTGCTTGTCTATTAAAAGGTTTACTGCAAAGTGGTGACTTTGAGA
ATACTTGTGTATATGCTTGATGACTTAGTGTACCAAAAAACCTTTTTAGGCTACTAGCCATGTACCCCTTTTCCTATTT
TGAGTGAATGTTATTATTTAATACATGTAGCCTATTGCCTATTGACTATCTGATAACTTTTTTAATAATTAAGAATATG
>00264 7 reads, 1096 bases
TCGTCACATCTCTCCTTGTATGTTAACTGCCATCTCTGCCATGGGATCTGCGGGTGATTGGTGCTTGATTGAAAGTGAT
CCAGGAGTTTTTACCGAGCTAATTAAAGGCTTTGGTTGCAGGGGGGCTCAAGTTGAAGAAATTTGGAGTTTAGATCCAG
AGAGCTTTGAATCACTAAAACCAGTTCATGGGCTTATATTTCTCTTCAAATGGTCACCCAATTCAGAACCTGATGAATC
AATAGTTCAGGATAGTAGGTTACAAAAGATATTTTTTGCATCTCAGGTCATCAACAACGCATGTGCCACACAAGCAATC
TTGAGCATTTTATTAAACTGTAATCATGAAGATATTGAGCTTGGAGATACTTTATCTAATTTTAAAGACTTTGCACAAG
ATTTGGATCCAGGGCTTCGTGGCCTCAGTCTAAGTAACTCAGACACAATCAGAGATGTTCATAACAGTTTTTCAAGGCA
ACAAATGTTTGAGTTTGATGAAAAGATTTCCAAGAAAGATGATGATGTTTTCCATTTTGTCAGTTACCTTCCCATTGAT
GGTCGCTTATATGAACTAGATGGTTTAAAAAGTGGGCCAGTAGATTTGGGGGCAATCCCATCAGACAAAGATTGGGTAG
ATATTGTTAGACCTGTCATTGAAAAAAGAATGCAGAAATACAGTGCTGATGAGATTCATTTCAACTTGATGGCTGTTGT
TTCTGATAGAAAACGAACATATGCTAAACGATTGCAAGAGCTGAGTTCCATTGTAGAGAGCAGCGGAATGGAGTCTGGT
GATTTACAAGCTGAAATAAACAGACTAGGATATTTGATTGGAGAAGAAAACAGAAAGGAAGAGAGATATAAGGTTGAGA
ATATAAGACGAAGACACAATTATCTTCCTTTTATCATGGAACTTCTCAAAATATTAGCAGAAGGGAAACAACTCTTACC
ATTAATTGAAAAGGCAAAGCAAGCATCTGCAAAGAAAAGAAAGGAAAAAGAAGTGAAGGCAATGGACACTAAATAGCAG
TTTTACAAGAACTTCCCAACACAGTGATCAAAGTTGAATACCATTCTGAAGCAAGGTGAACAACTGAAT
>00265 14 reads, 958 bases
GACGTTGCGAGGTGACTGTAGTCASYGRCTATGAAAACCACTCAACCATCACAGGATGTTGTTTGGATGAACATAAAGA
CACCTGAAGCAAGAATGAGAGATAAGGTGGCCACCCAGAAATTAATTGAGATTGTCACAAGACCAGATACTCAAGCCAA
ACTGGCCGCCAAGTCCACAAAGAAGAAGGTTGTGTGGCAGGAGATAGGGGAGGAGATGGGACTGTTTGGATTTATATTT
GAGAACCCTGGTGATAAGTGCTCTCAAAAGTGGCGAAACATCGAGCGAGGATACAAAGATTACGTAATGAGAAAGTCAA
TGTCAGACATGGGAACTAAACGAGAACCGGAGTTCTACCACCTTCTGAGCCAGGTGCTCAAGGACAAACATGTTTATGA
AAGTGTTCCTGTGTCAGCAGAAGGTGAGGAAGATGGACCGACCAATCAGGATTTAATTGATGAGTTTGTAGACATGGAT
CCAGCTCCCAGGGAACTAGCTGGGTGTGAATCTGTCGCACCGAACATGGATGAATGTCAAGGTCAGGTCAATCCGGTCA
CAAACTCGGGTCAAGGTCAGGTCACAAACTCAGAATCTGAGCGYACAGGTCCAGAAATATGTGGGCCAGAGGACATGAA
TCTGTCAGAAACTCCGAGTTCATCAAGGAATGAACATTACGGCAGCTTTGCCCAGGTTCTAGCAGAACTGAATTTGCAG
AGGTCTCACATGTCCAAAATGGAGTCTGTACTGCTCACCGTGCAACAGTTGTTAGAGGAACAGAAGCGAGACAGAGAGG
TGATGCGCATGGAGTCAAGGGAAAGATTCGCAGAGCTGAAGTCTCTCATTGAAAATAACCAGAAGGAGAAAATGAAATT
CATGTATGACTTTTTAAAGAGTTTTCAGTTTGGCAAGGGAGGTAAGAGAAAGTGTGTTGACACTGAAGGTCTGGAGAAC
TGTTCTGAAA
>00266 2 reads, 1021 bases
AAGGCTAGATTTTGRAAACTGTCATTCAAGCCAGCACAAAATAACACATGTGCCTGACTTTTGTGTGTTTACATACAAC
ACACCAGACTGAATTTGTGTGTGCATATAGTCATTTTAACATTATTTTAGTCAACATTCACGCTTTACAGATATTTACA
GTGTTGCGATCGATACAAAATGTACATCCTAGAGCAAAGGTCAAAGTTTAGTCTGGAATCATTAATAAATTATCGTTCA
CTTATCCCCCTTTGCAGACACGTTCAATTTGTTAGTTCTTCATTCATTGTTTACACTTGCGACTGACATTAGTCATCAT
CCAGTGTGTCCAGGTTTATTTTCTGGCCCCAAACTGCCCCCTCATGCCTCGTATCTGATCGGCCACTTGTCTGTCCGCC
AGTCCCAGTCTTGACAGCACGTACTCAAAGTCACCCTCATTCTTGTTTTCAAGGGCTGCCTCAGCCGCCTCTCGGAACA
TTCTAAGTCGTATCAAGCACTTGACCTTCAACTCTGGTGGGACTCTYGGCAGGTATTTCTTGGCCTCKCCGACATTCCT
CTCTTTCATACAGGCATCAATGAACATCTCAACGCCCACTGGGGCTTTCTTGGTTTTTGACAGCTTTTCCAGCTCTCCC
CATTCCTGCAGCTCAGCCAGGGCATAAACTTTCATGATCCAAAACCTTCTGTCTGGTACTTTAAATTCTTTCCTGAGTT
TCTCCACATACTGGTGATTGCCGTCAATGGTCAGTTTGTACAGAGTTTTCTGTAGGGACAGGTCAGCGTAGGTGTGACC
GGTCTCATCCTCCAGTTTCCTCTGGTGCCTCAGTAATCTGATCTGCTCGTCCGTTTGCTTGTTGGCAAAGTCATTTTTA
CATCTGTGGAAACAGTTCATGRCTTACTTCCAGCACTTTGATTCTCTCTTCTACATGATCAAGTAGATAACTCCGGGTG
ACTTTACAGTTTCCTTCATCCAATGAGTTGTCCTCCTGATAGTACAGATCTTCAACCAATTTCAAGTTCTGTT
>00267 26 reads, 1557 bases
CCAGTTTGCTGAACGGCCACCGCKAWYSRWTTACATCACGCACTTCTGCATGTGGCCTCTTTTCTGTGTGCTACAAGAG
AGTCTCAACAAATGTGAAAGCAGAACTTCGACAGAATTTCCGTAGCTTGTGTGCTGATGACACCCCAATGGTCCGCCGC
GCTGCTGCAGGGAAACTAGGGGAATTTGCCAAAGTGGTTGAGTCTGAGTATCTTAAGTCTGATCTTATTCAACTTTTCA
ACATGTTGGCTCAGGATGAACAGGACTCTGTTCGCTTGCTAGCTGTCGAGGCAAGTGTTAGCATTGCATCTTTGCTCCC
ATCTGAAGATACCGAGCAGCTCGTGATGCCAACGCTCCGCCAGGCAGCTGAAGACAAATCTTGGAGGGTACGCTACATG
GTTGCAGACAAGTTCACAGAGCTTCAAGCAGCTGTCGGACCAGAGATCACCAAAAACGATCTCGTGCCAGCCTTCCAGA
GCTTGTTGAAAGATTGTGAAGCAGAAGTAAGAGCTGCATCAGCCCATAAAGTTAAAGATTTTTGTCAAGCCCTGTCCCC
TGATGTGCGTGAGCAGATCATTATGACCAATATTTTACCCTGTGTGAAGGACCTAGTTGCAGATGCCAATCAACATGTC
AAGTCTGCCCTGGCCTCGGTCATCATGGGCCTGTCACCTATACTAGGCAAAGAGAACACCATAGAGCATCTTCTGCCGT
TGTTTCTCACTCAACTGAAAGATGAGTGCCCAGAGGTGCGACTGAACATCATCTCAAATTTGGACTGTGTCAATGAAGT
CATTGGGATCAAACAGTTATCCCAGTCATTGCTTCCTGCGATCGTGGAGCTAGCGGAAGACACAAAATGGAGAGTTCGT
CTAGCCATCATTGAATACATGCCCCTACTTGCTGGGCAATTAGGGTTAGAGTTCTTTGATGAGAAATTGAACTCCTTGT
GTATGACATGGTTGGTAGACCATGTTTATGCCATCCGTGAAGCTGCCACTCTCAACCTAAAGAAATTAGTGGAAAAGTT
TGGTAAAGATTGGGCACAGCAGACAGTTATACCAAAAGTCTTACAGATGTCTAGGGATCAAAACTATTTGCATCGCATG
ACCTGCCTGTTTTGTATAAATTTGCTTGCTGAGCCTCTAGGACAGGAACTGACCACCAAGCTGATGTTGCCTACTATCA
TCACCATGGGATCAGACCCCGTCGCCAATGTTCGATTCAACGTAGCTAAGACATTGCAGAAGTTGGCCCCATTCTTAGA
GCCTAGCGCCATTCAGTCTCAAGTGAAACCCTKGTTGGAGAAACTAAAGGCAGACAGTGACATGGATGTCCAGTACTAC
GCCTTGGAGGCATTGGATGGTCTAAAATAACTTTTCATGGAGATTTAAACAGATATTTTTCAAATTGTGCATAGACCTC
AGTGTTGATGAGTTCCACCCCTACATTGCAAATACAGAAAGAACACTTGTCATTTTCCAAGGCCGTAAAATGCTGTGTG
AATGGTTGCAAGATTTTAGAAATTATTTTTATGATTAACTTRAATTTWWWWWWAAA
>00268 2 reads, 1201 bases
TCTAAAACTAGAGTAAATCCACCTATTACGTCTATGGTTTTATGGAAAAAAAAACAAACTATTACCCAGATTTAATAAT
GTTTTCAGTAAAAACTGATCTAACAGAGAGACAAGAATTTTAGTAGTGTGAGGAAAAACCTTCCATTCTTAACATTGCA
CGTTTTGTAAGACAGTAAACAAAATTATAAGTAGGTAAAGATAACAAATATGACTTGAGGANNNNNNNNNNAAAAAAAA
ACCAGGGAAGGTCTAATCACTTCCAAAATAAGAACCACAAAAAATTCTCTTCACTGTCAGACTGATCTATGAGGAATGA
ACAGTACAGGTGCCTGATGCAGAGTCACTTGACAAAATGTTACACAGTCCATCTATCAGCTTGACAAGGTCACTCCACA
AATATATCTTTTCTTTTTGGTAAGGGATTATGGGCTTGGCCAGTCATTGAGTTTTCATGGAAATTTGTGGATGTCTTGT
AAGAACATGTTGGGTTTTGTCTCCTTTCTATTGAGGGAGTGCTTTCAAAATAGCATGTACTTCTTCAGCTACTGCAGCC
AGGGAGAACTGGAATTGCTCCTTAGNNNNNNNNNNTTTTTACCATAGACATTCGCTGATCACGAATGTGTTCAAGGGTT
GCAGCCATGTCAATCTCTTTGGCTCCTTTGGCCATTTTATTGAGAACCATGTCAATGAGGCAGTAAGTGCCTGAGCGAC
CACATCCATCACTGCAGTGTACAACAATGGGGCAAGATCGTCCTCGGAATGACTTGTTCACTTTACGTCTGAAATCAAG
AAGAGCCTTGATGGAAGCAGGGACAGACAACTCTGGCCAGGTCAGAAAATGAAACTGGGTCACAGTTCTGGTCTCATTG
GTTTGAAGGTTCTTCAGGTAGAAGCTGCGCACCAGGTAATCATCACACCAGATATGCTCTGACACCAGGTGGACCTCAT
AGATATGATAGAGGTCGCTTCCTTCTTCAGGCCAGTAGCGATGACACAGGCTTGTACCATTTTCAGCCAGTTTGGTCAG
CATCACTATGACAACAGATCCCTGCTCCCAGATCATCTGCCAGAAGTCAGCCACTGTGTGAGGGAGGGGTCCTTGGGTA
CATATGTAAGCTGGATTTCTGGGGTCATGKTYYKTAATKAAGTKTGYGTTGACGTTGTCGGAGTTGGAGACATTGCGCA
ACCTCCTGTCCTATTG
>00269 17 reads, 1275 bases
CCGTCACAATTCATAACCGGCCTCATCGCCATGGGAGAAGAGGTGGGCTGTGAGATGTCATTCCGGGCATTCGGCCATC
TGTTGCGCTATGGGGAGCTGCCCATTCGACGAGCTGTTCCCTTGGCCCTGGCTCTTATTTCGGTGTCCAACCCAAAACT
CAACATACTAGACACACTGAGCAAGTTCTCTCATGACAGTGATCCTGAGGTGGCACACAATGCTATCATTTCCATGGGC
ATAGTTGGAGCAGGAACCAACAATGCCCGCTTGGCTGCAATGCTTCGTCAGTTAGCCGTCTACCACGCCAAAGATCCAA
ACAATTTGTTTATGGTGCGCTTGGCACAAGGCTTAACTCATCTTGGTAAAGGAACCCTTACACTGAGTCCTTACCATAG
TGACCGTATGCTTATGTCCCCAGTAGCTGTCGCTGGTTTGTTAGCCGTACTGGTTTCTTGCCTTGATGTGAAAAATATT
ATTCTTGGTAAATCTCATTATATGCTGTACAACTTGGTTTCTGCTATGCAGCCTCGTATGTTGGTCACATTTGATGAAC
AGCTGCGTCCACTCCCTACTACAGTCAGGGTTGGACAGGCTGTAGATGTTGTTGGCCAAGCTGGTAAACCTAAGACCAT
CACAGGTTTCCAAACTCATACCACGCCTGTGTTATTAGCGTATGGTGAGAGGGCAGAATTAGCAACAGAAGAATATATA
CCCTTGACAACAATTATGGAAGGTTTTGTCATCTTGCGCAAAAATCCAGATTACAATGCAGAGTCTTAATTTCATGCCA
TTAATTAATTTGAAGTTCAATTATTTCTTTTGTTGCCTTTATATTGTATTTGTTGATTTACCAATGATCCTGGCCTCTC
AAGTGTTGAGAAATAAGAATTAGAGAGGGAAGACTTAACTAGGTAGATAGATTTGCATTTTTCTACCATGTCAAATGTC
CAGAGAGCAAATTTTCAGTGGAAAATTTTCTAAGTAGTTTGCTATTTTTGATCACTAGGTTGCAGTTGTGTAAATGGAA
GGGGGTAAATTAAAAGACCTTTGAAGCTCATTTATTTACTTGTATAAGTTGTCATGTTTATTCCATTAGCATAACGCAG
AAGCTAATTTCAGTTTAACCGTTTTAAGAACCTTCTTTTATTTATGMGATCGGTAGAGCKSTCCAATATGATGAAAACC
TACATTTAAAGTTTTTTTCTTATAGTTCCAATTCMGACAGTTTTGAATATATTTTGASGATGTTCTTTGACTGGAACAT
GATATACCGCG
>00270 4 reads, 1126 bases
CCCATTATTTTTGCATAAACCGSMTATMKMGTTATAGTTATAGCCTCAGTGTTGGTTTGTTGTAAGTTGAGTATATAGG
ACTTCCGATACAAGTACACATTAGTCATTGGAAAAAATAAAGACTTTCGTATTTATAATATTAAATGCAACTTAAATTC
TAGTTAGGCCCTACTAGATTTCAGATTTATAGATGGATCTTGGTCTTGCTTTTGACGACGAAGATCTGAAAAATATTAA
AAAGAAGATTGACATCTCCACTGCGCCTTACCACGTTAAAATTGTACAACCTGGGTGGTTTGAGTCAGCGCTAGATGCA
TATGCCCATCAGGGCAGGACAGAGATAGAGACTGAGCAAATTCCTCATACATATAAAATGAGTGGAGATTTTCATTATC
ATAAACAGAACTACAGGAAAGCTTCTGAGCAGTATCAAAATGCATTAAATTTATTACCTGAAAACAATGTATCTGTACG
ACAAGATTTAATTGAGTCCCTATCAAGATGTTACATGTATATTGGGCGTACAGAGGAAAGTTTACATCTGGCAAGAAAT
TTGGTTGATGACTTGTCTAAAGAAGATGAGGCACATCAAAGACAATCATTAATTCTTCTTAGTTCTGTGTGTGCTAGGG
TAGGAAAACGGGAAGAATATGTGGATTGTCTAGAAAAATTATGCTGCCTACAGCCATATTATGCACAATTTTGGAGCCA
ACTTGGTGATGCTTATACTAATCTGCTCAATGACACCCAGATGGAGCCCCATAATGCAGTTGTTCCTACACATCTAGAC
TACCAAATTAGGCAACTTACTTGTTACACAAGGGCTAAACTGCTGCATAAATCAGTTGATGGAACAGCTAGCAGCTTAG
TTAGACTTAGGAATATAAATTGTATAAGAGAGTTAGAGAAGAAAATTGCATGTGCACCATTTTCTGACGGAGAAAAGAC
TTTGGCCCATGAGTTCATACAGCAGGAACTTGAAAATCAAGCTACAAACATCAAAGAATCCACCAGTGATACAAGTGAA
ATATTCATACAAGAAAGCACTGATAGTCAATCTAAATTAACTCAATCACAATTGTTTTATCAACGATTTTGTACATGGT
TTACAAAAGATAAGTCGCTT
>00271 2 reads, 1269 bases
CTGCGAGAAGGCTAGAGCTTTTACCGCTACCGACTAACTTTTGTTGTGGCCTTCTGTAGTCTTTTTGCTTCATTTCAGG
CAATTGACCCACCAGTTTACAAAGACACATATAAAGCTGAAGGTTTTATACGTTTGCCTTATGCAGAGATTGTGGAACC
TTTCAGAGCTTTCCTTGACACCCCAAACTCTCGCAGCCGGGTAGATTATTATGATGGAATTCAGCGAACAATCCAGTAT
AGCCAAGCTCCAGGCCTTCCATTTGGAACCAACCTGAAAGTTGTCCCATTTACAACACAGTCGGTCATCAACAAGGTTT
CATGTTTCCAAGCCAACGGGACAAATGATGATCCTGCTACACTGACAACAATTTTACCAGACCTTACTGGTTTCACTTA
TCTAGGCCAAGAGGTACTTGAGGGCCGAAGAGTGGACTCTTTCCAAAAAGTGGTTACAGATGGCCAAAAAGTAAGCACA
TACACTTTCTGGGCAACAGAAACAGATCACTTTCCAGTTCGTTATGAAATGATGGGATATGACTCTCTGCTTGGCTCAC
ATTTTGATAAATATTATGTGGATTACGTGAGATGGGAATCCCCTGCCAGGTTCTCTGATGACGATTTTGCTTTGCCAAG
GAACCTGACCTGCCAAGGTTTTCCTGGACCTGGTGCAGAGCATGTGATTCTAATGAACCCCATCCGTGAATACATCCAT
CACCATGATAGTCATATCCATGAAGGGTTTGAACACTTCAAGAGAGCTCATGGCAAGGTGTACAAGAAGGACGAGCATG
ACTCCAGGAAACATGTCTTCAGACAAAACCTCAGATACATTAATTCAAAGAACCGAGCTGGGCTTTCATACACTCTGGC
AGTTAACCACCTGACAGACCGCACTGACAAAGAGATGAAATTTCTTAGAGGCTATCGTTACAGTCATGTAGACCATGGT
GGCCAGAAGTTCACATTGACTGCCATGAACAAGCAAGATGTACCAGACCAGTGGGACTGGAGGCTTCTGGGTGCTGTAA
CCCCTGTGAAAGATCAGGCTATTTGTGGTTCTTGCTGGAGTTTTGGAACAACAGGAACTATTGAAGGTGCTAACTTCCT
TAAGACTGGAAACCTGGTGCGACTCTCTCAACAAGAACTGATTGACTGTTCATGGGGATATGGCAACAATGGTTGTGAT
GGCTGGTGAGGACTTCAGGGCCTACTCTTATATTATGCAGAATGGTGGTCTAACAAGTGAGGAGCAGTATGGCCAGTAT
TTGGC
>00272 11 reads, 1013 bases
CGACCGAATCTCTCTGAACASCTGASTYAMTGGAAACTAATTCAGTTTCAAACAGGGTAAACACCTCTCAGTCATTGCC
ACTTACCACTCACTCAGACTCATCTTCATCAACAGTGGACTCTGATGAGCCAAAAGCRAAGCGATTCAAATTTTCAAAT
GACTTCGTAACCACGTTAGAAGTACCAGTAACTGAAATGGCTTCTACCTCTGAATTATTACAATCTTCAACACCTGATC
TGCCATCTGATAATCCTTCTCTCTCATCAGATGTAACCACATCCATCAGTGATGACAGCCTAGGTGATACATCAAATAG
TGCTCTTCTTGACGTTACGTCTAACCAAACTTTAGAAAAAACTCTTGAAAGTCACCCAGATGTTTCTTGCAACTTGGAA
GATGCAGAGCCTGTGGCGTCATCTTCTACTGACCTTGGAGGCGGTGACACTGTATGTCAGTCCAGAGATGACCTTACAT
CTTCACCACCATCACATCTATCATCCTCAAGTGACAGTCAGGGCTTTGATGTTTGTGGAGATGCATTGAGGAAGTCATG
TGAAAAACAAGAGGAAACTGTTTCTGAAGAAGAGATTTCATCTCAACCTTGATTAATTTAAAATAAAATGTACATGTTC
GAAGCTGCCGCTAATTGATGGAAAAAGGATTTAACAGATGTCAAAGCTATTTGTATGTGAATATACAGACAAATATCAG
TTTTGTATTTGTAGGACAAACAATGATATAAATGCATAGCTTACTTGTGCAGTAGAGTTCATGAAAGCTTGTCAATTCC
TCTTTTATGATGGTGCAATATTGTAAGTGAATTTATTTATTCAAGAATATTGTTACCCGTTTTATAAGAAAGTGTTTCT
TAACATGAGTCTAGACAAATCAGAATACTTAACAATTTAAACATATTTTTCTTGTTAGTGTGTTGCCAGCAAAGCATTA
ATCAAGAAATTAATATTGATACTATGCTTTTCAGTTTGGCACAATTTAAAAGGCAGAGATCGGAA
>00273 11 reads, 916 bases
ATTTTTCCAGTCTTTTAACTCAATGACATCGGCATATACACCAGGTCTTCCTGCTTCAGCACAACCGTAGCCCCAGCTT
ACTATACCAGTCAATGTCCATCTGTTTTCTCTGTATGTATAGAGTGGTCCACCACTATCGCCTTGGCATGAATCAACAC
CTCCTTCAGGCCTGCCTGCACAAAGCATGCGTAGAGTTATAGATCCAGAACCGTATCTTTGAATACACGTTTGCCTCGA
TTTGATCGGTTTTTGTACCTGATGAAGTGCATAAGGAGATGATCCACCTGATACTAAGGTACCCCATCCAGCAACAATG
GCGTTTTCCCCCTCATTCCATCCTTCGTTTGGAAGACACACAGCGGAAATGTAATTGTTTGTTGGTAGTGCTGTTGCTA
CTCTAAAAATTGATATGTCATAATCCAATGTCCAACTATCGTAAAGACTGTGAATAACCAAGTCAGAAAAACTAATAAT
GACTCGTTGTGCGTTGTTATTGTTTACCCTATCATGAATTCCACAATAAGCAACATATCGGGATGCTCGTCTGTCACTC
GTACAGTGAGTAGCCGTAATCGAAAAGTAATTGCCTGCTAAGTTTTTTTACTAAATTTGAGCCACACATGTGCGAGGTA
GATGACGTGCTTTGGCGTAAACTGCATATTGCAGGCCACGAGTAAGATACTGATTCACGACCTCCCACTATTCTTGTAA
ATTCTGAAACACCATTGTCAGGTAAAACGGGTCTCTGGCCGCATCCAGCAGCATCAATCTTGTCGTAACGACTGCGTGT
TTGAATGATGCTATCTAGTTGACGCAAAGTAGGGAGAGCATCACCAACAGTGACCAAAACGACTATCAGTAAAGCRTTA
CCCTGYTATCYYTAAGAAAAATGATTACCCTGTTATCCCTATTTTTT
>00274 10 reads, 807 bases
CGTCTTAGTAATGTACACTTATACACATCAAACTTCCATTTTAAAACCATCAGAGCCAAATCAATTACTTATGAAATGG
TGTTTTTTAATTTAAAAATAATTTCTTGATGACGACGCATTAACACCTTTTCTAACTGAATCTTATACAACACAAAATG
AACAATAGCAATTCATTTAAGGAAGAAAACTAAAAGGAAATTAACTAATTAAATGAAACAATCGACGTGTTCTATCTTG
ATTCTGATATAAAACAGTTACTACCACAGAATCTCCAATTACAGCATGTATTCAAGTTTTTAAACGACTGCCATAACCT
GTTCCAAAAAATGTCACTCCGCCATTGCTTCTCGATTTTCTTTACAAGCTATTCTTTTGCTCCTCTCTTTTAGTCGCCG
TTCCCGTTCCCATTCTTTCACCCGCATAATTTCATCATTATTTTCACAATGCTCCCAAGCGTGTAATTGCTGTGAGCAA
TATTTATTAAGTCTTGGGAAGTGTTCTTGCCTACATTTCACTAGTGCTAAAAAATAATCCACACAGTAATCTCTTTTAT
TTAGAGGGATATTGGCTCTGTCCAGTTCCTCTCGAGTTGCCTTGATAGTTTTTTTTTTTTTTCTTTTCGACCATTTGGA
AATCCTAACATAGGATCGAAAGTCGGTGGATTTTTATAGTCTGGTGCGGTATCAGGGTTAGAAACATACGTATACCACA
TAGGTCCTAACGCACCCCCCATTGTTGTTGATATTCTCGACCTCCAAACTCCAAACTTGGGATACCGGAAACTATTACC
CTGTTATCCCTATTTTT
>00275 10 reads, 1067 bases
GGGGTAGYATCGAWRCWTTGTAATAACAGAAGTAACAAAAATAGAAATTTATTTTATCAGTGCAGGATTCTATGCTTCA
TCAACTTTTGCTATTTAATGAATTGTGTCTGACTGATCTAATCTGGTTTCTGAATGCACTGGTGACGCAATAATTATTT
CCTTATATAAGTAAGTTTCATTGTCTTGAGATACTGATACATTTTCGTCTCCACCTGGCATCTTCTTGTCCCAGAACTC
ATTTACCTTTCTTTTAATTCCCATACTTTCCTCCCTCCACTCTTTTTGCCAAATGCGAAGTTCTTGAATTTCTGGATCC
TTCCGAACTAAATATCCTTTCCAGAAACATTGAATTCTAAGTGCTGCTTCATCATCTGTCCAGATTAATGACTTGGGTA
AAGGTGGACGAGGGTGATCTTTAAGCCATGCCTTGACAAAAGGAATATCTAACAATGGAATCATTTGCCTGTCTTCATT
TTTCTTGTATGGATTGTTGCTGTACAAATATTCAGTCAAGAAATCTGATGCATTGAACTTTGTTCTTTTCCTCTCAAAA
CATTTTTCCAGCTTTGCTTTTTTTTAGCATTGCCTCTAATGCTGGAAGAAGCCAAGGATAGATGTAATGATTTAAGTAA
TCTGTTGCTTGACATGTATGATAGTCAGGAAGTGGTGCAGGCTGAGAAGTATCCTTCTTAGCTGGTTTCTCTGCAAAAC
TGTAACCAAGACAAGATGGATGACTTACAGCTGGATCAAAATCAGCACATACATCTTCATCAATCTCAACTTTGGTAAA
CATCTTGCCATAGAAAACTGGATTGTGTCTGGATGGATCATAGTCACTATAATCAGTGGCAATTGATGCTCTGTCTGAA
TCTTCATCGAATGGTGGCCTTTGTGAAGCCAATTCTTTGCAAATCTCCTCCCAGAGATTAGGTTCTGGTATCTTTTTAA
TTACTGACATTGTATACACTGACCATTAACAACTACCAACAATAAACTATTGGAGAGTACGCCATTCCGTCGTTAAGCA
ACAGGAACCACAACTGTGTATTACCCTGTTATCCCTATTT
>00276 16 reads, 1009 bases
TAAACGAACAAATTCGTCCCCAAAATCCTGATTGTAGCAGTGATCAGACATTGTAGCAGTGGCCAGACATTGTAGGACC
GGTCAGAAATTTGGAGAATTGTATTCAGACATTGTATTCCATCGACAGAAGGAAATCCCTAAGTTGCTTTGACAAAGCC
AACAATGTTTCTTCGATCATTCATCATGACGGTCCTTCTGACCACGGTCACTTGTTTACTTCCATTTCCTGACTTGCAA
GCACCCACCCCGCTAGTTCTTAAATTCGCTTCTATTGCGAGTGGAAGATTCAGCGATAAAGCCGAGGTTAAACAAGAGA
CTTTGGAAAATGAGCCCTTAGAACATGACGTCATTAACCTAAACGTTGAACCAGTAGTTCTAAATGACCCAAGAGGGCT
TGCCGCTCTCCGCTTAAGAGAATACGACAACAAACAAATATTGCGTGACCTCCTGTCTATCCTTGTTGAGGATGATGAG
CATCTTATCAGGGTCAAGAATTTCCCGTTGAACCAAACTATGTCCAACAGAGATCTGGCCAATATTAACGTCGATGATC
TTTTCAACAAAGAGGAATGCAACCTTGTGTTTATACAGGAAGGAAAAGCAGTCTTTATCGGCACCGTTCCACAGTGTAT
TGGAAATGAATCAGAGACCCCCAGCAGCTATTACGCCAATGTGTTAACATGTGACTCAAACACCATCGTCGTCCCAATC
AATGAGAACTTCCCCGAGGAGGACAGCCGCGTGCCTTACGTCAACTACGTCATTTATAGGTACCCTTTGCCTAAAGAGT
GGACAAAGAAAGTAAGCAACTTCAAGCCAGCGTGTCCAGTTTAAGAGAAGAACTGGATTAATGTCATGAATCACGTGTG
CATGTACCAACTCAGGGTGTACATACCAAAATACGGCCGCCCACTTTTCCCCCTCCCTTCTCTAAGTATCTATATCTGT
TTCCGGCTTAAARAAATACAATTCTGATTTCATTAAACTTTACTTATGTTTTTTTTTTTTT
>00277 4 reads, 772 bases
TTTTACCGACGCAGGAATTGTTATGCATCCCTTATTCCTTTGCTCTCTGGGATCCGGCTCCACAAGGTTGAATGTGTCC
GATATAAATCAAGAGGGCTTATTCCCAGGAGAAAAAAACCAATTCAAAAATGGTTTGATCCAAAAGATACTTCCTGGGC
AGAACCAATTTTGAATCACCAAAAGATGAAGGAAGCACAACCAGAACAGGAACCATCTGTGCTTCACATGGTGTACAGA
ATAAAAGATCATTACACCCGACCATACTGGGAGAAAGATATCCTTAAAGAATTTGGTCTGTTTGAAAAGTCCTATAATA
CAGTTGTCCTGAAAAACACACCTGAAATAAACGAGAAGCTGAAAAAAAATTCAGCATTTGATACGTATTAAACCAGTAA
CATTTCCATATGGGCTTCCTAAAGATGAAGATGATTTTAAACACTGTTTCCTGCGTGAAAATGGAGAGTTCGTCGTCAG
GCAACGCATTCATGATCAGAGTGATGCTGTTGAACAGGCTTGGGCAGAGGTTAAGATGGTGGAAGAGCAAACTGAAGAG
GAAAACATTTGGAAAATGGATAAATATACAGTTGTTAAGGATTGCACCAGAGTTTTACAAAGATTCAAGCTCAGTGAGG
AGTATTTTAGAGAGAAATATATTTACAAATACAATCAAGATGGCAAAGAACACCGTTATAAAGGGGAAGATAACATTGC
CAGCCAGAGACATGATTGGTATTAACTTTTAAATGTATATCTGTAATCTTCTTTATGTACT
>00278 10 reads, 950 bases
CGTGTATATCTYTTTWAAMTTAGAATCWTGTCKAYGCATTCCAAAACTTGGAGAAATGCAGATTTCAGCGGTGCTACTT
TTTAGTGTCCTGTTCTGTACACCCGTTTTTCCATTTAGACGGGTATATCTGGATCCTTTAGATCCTCATGATAAAAAAA
GCTGCCCCGACGGATATGTGTCTGATGTAGACAACATTCATCTCACTGGATTTGTCAACATAAGTAATTTCAGAAACGC
CAGTGCCAGCTACATTTATATTTCCTGTGTGACCATTTTTGGACATTACATAGATATTAAAGGAACCGAAACGTTTTAT
CAGTACTGCCTTACCGGTAATCCTAACCTGGGCATCAACCACTGCAACTGTACATACTATGACGCCAAAATATTCCGTG
TCAAATGTGTCATCAGGGCCATACACAAGTACGACAGGCGACCATTGTACATGTACGGAGGAGATTATTTTGATTACGT
TGGATACGGTAGCGAAGCTTTGGAGCTTCCTAAAGTCTATGAAAACACATCTTGCAGACCAGGCCTGCTTTGCCTTGAC
CACTCCAAAAATAAAGGAACCAGATTGGCGCGATATCAAGAAGGAGTGTTAGGTCTCGGTTTTCTCATCACGATCTTGG
CTGCGCTCATATAGCCTCTGGTCAATGAATGCCTGCAAGGTCTACACCTTTATCGTCCAGGTCCAGTGAACCTAAAAGC
TGAAAGTGTTTTGTTTCGTTTAAAGATTTAAAATTATAACGCATACAAAATACATTACACACTCATTTTTTAAAGTGAA
AATTGTTCCTATAATTAAAAGATATTAATGTACATATTTTTAAACATGTGCAAAATGTATACTTCTCCAAATTATATTA
TTTCAGAAAAAAACCGTGTCCAATCTTTAAATGTCAATAATATTTTACGTCTTACAACATCGGTCTTATGTAACATTCG
CA
>00279 3 reads, 924 bases
CGTATCGATAGAGTTTTGTTTTTCTTTTGGAAATTAWTTAAACACGTGTTTTTTAAAATCAAAATATAGCAACGTTTAC
ATTAGCCACTGTAAAGAAAATACGATGCCGAAATCTAAAAGGGATAAAAAAGTTTCGCTTACACAGACTAGAAAAAAGG
GTTTGGAGTTGAAGCAGAGGTTAATAGAAAAGATTCGTGAAACAGCTGACCAGTATGCAAGAATATTCACATTTTCTGT
ACACAACATGAGAAATGTTCAACTGAAAGAAATTCGACAAGAATGGAACCATAGCAGATTCTTTTTTGGTAAAAATAAG
GTCATGCAACTGGCCCTGGGAAGAACAGCAGACGAGGAGTATCGAGCGAATCTTCACAAGTTGACACAGCATTTACAAG
GACAGACGGGTTTGCTCTTTACCAACTCAAAGGAAAAAGAAGTATTAAAATACTTTGATGAACTGTATGTCCCCAACTA
TGCTAGATCTGGCACTGTAGCCACCCAGACAGTCTTACTGGAAGAAGGTCCACTGGCTGAATTCAGTCACTCACTGGAA
CCACAACTCAGACAGCTTGGATTACCTACACAGCTCAAAAGAGGTGTTATTCATTTACTGAAAGATCATACTGTTTGTG
AAAAGGGACAAGTTTTAAATCCTGAACAGTGCAGAATACTTAAATTATTTGGCCACCAAATGTCTGAGTTTCACATCAC
AATATGATGGAATGTGGAGTAATTCTGGAAAATGGAAACGTTTCGATGAGCGGCCTGAACACATTGTACCACCAAAAGT
TCGAGTAAAACCTAAAAAAGACGAAAACAAAAAGGATGATGTTGATGACGCAGAAGATTCTAAAATGTTGGAGGGTGAA
GAATCTGAACCAGAAGATGATGAAGATGAATCTTGATGATGATTGAATAGTTTTT
>00280 8 reads, 1007 bases
CATTATTAGATAATTTTAAGSATAKMWTAYGAATAAGAGTCTTATCTTGCTGGCAGTCTTGCTCGCCTCGGCTGCAGTT
CTATACAACATGAACTCCGAATCCGCCTCACCAGAGACCGTTCAATATCTTGCCTATCTCTCCAAATTCGGCAAACCTG
TCCCCTCATCAGAGCAATTAGTTTATAGAAGCAAACTCTTCGCAGAATACATCGTTATGATGGAGAAACACAACTCTGA
TTTGGCCCAAAAGTGGCAAATGGGTGTTAACCAGTTCTCTGACCTCACCAAAGAGGAATTTATGAGTCTCTATCTTGGA
GAAATGAACCATTAAATCAAGGAAATTAATCAACCCATCAATAAAGGATTCACTGTTGAGGTTGACTGGAGAACTAAAG
GAGTCATCACTGCTGTTAAAAATCAAGGTCAATGTGGTTCATGCTGGGCTTTTGCTGCTACTGCTTCCCACGAAAGCTA
TCAAGTTCAATTCAAAAATCAACCAAATACCATCAGTCTCAGTGAGCAACAACTCGTTGACTGCTCCCACATCTCCCCC
TATGAGAACAACGGTTGCAATGGAGGATATGGAGTTAGAGCTTTGGAGTACATCAAGGATTTTGGACAGACTACTTCTG
CCGCCTATCCTTATACTGCTAAGGACGGATCATGCGCTATCCAAGGAGGATCATACAGACCTTTCGGAGTTGCTGAAGG
ACATGGATGTGATGAAATTGAAGAGATTATCGTCAGAAGACCTTTGGCTGTTAGGGTTGATGCCAGTAACTGGCACCTT
TATAAGAGCGGAGTTTTTGATAACTGCGCCAAGAACATTAACCACGCCGTCTTCCTCGTTGGCTCCAGTGAGTCAGCCT
GGACAATCAAAAACAGTTGGGGGCCAACTTGGGGAGAATCAGGTTTTATCCGTCTTGCTAAGGGAGATACTTGCGCTAT
TTGTCAAGGGCCATCTTTTGCAATTTGATCCCAATCTCCTTATTATCCCCAAAAAAAAA
>00281 4 reads, 645 bases
AAACACTAGATGTGTAAAGAGTACGTCTATAAAATAAAAAAATCAAGCACACTGTGAGAATTGAGTCACTACTTCAATC
TACAATCTTTGGTTTGAGCACATCCTGTTCTGCTGGAACATTCTCTATTGCTAGTTGATCTGGGTCAGCTGTCAATCCA
TACTTTTCCCTAAATTCTGTCAAGTCTCGTCTCATGGCATAAGCATCCTCACCATCAGCATAATACTTGGGCTCTATTT
CACTGATCGAGAATTTGAGATTTTCTGTGTAAAGATGGAGGGCTGCTCTGTTACTTTTTCTTACATGCAATGACACGTA
CTGTGCATTGAAATTTTCCACCATGGCCCTAGAGGCCTGGTCCATTAACTTCTGAGCAAGGCCAAGACGTCTATGAGAC
CTTTTGACAGCCAAAGATGTGATGTGACCGTGAGGTACAGAATCCTCGGGGTCTTCCTCCATCTTGGCCAGAACATAAC
CAACAATTTTTCCACTATGATCTTCAGCAACATAGGACAACTGTGGCCACGAAAGACCATGATAAAAATAGTACTTCAT
CTGATAATTTTCTGGCAAGCACAGGAGGTTACAGTGCTGCATATTCATTAAATCATCAGGAGTTGCACACCTGATATTC
ATGGCGAAAAWTG
>00282 11 reads, 1044 bases
AAGTGTTAGTAGACAATTTTTTTTTTAACGCTTTATATCGCATTGGCTTGTCAGGATAGGGCTCATTAAAGTCAATTTC
CAGGATTTTTAAGCAGCTCATTTTAAATGCCATTTTTCAAAATAACATTTCTGATGAAATTCTCAGGAAGAGAACTTGC
TTTGTTACTTCTATATGTATTTAATTAATCCAAATAGATATGGTATCACAGGTAAATTAAGACAATATTATTTTCAAAA
CCTTCAGGTCCTTGTGTGGCTACCAAGGAAAGCTTGTACTAATAAAAAAAGCTTGTATGTTACTTTTATGTCTGATTGT
AACAGACATGTCTCAGTGTTGGGTCTAAGAGTCTAAAATATGGTGGTGATAGTAGTGGTAGTGAAGTGTATATCAATCT
GAGATTAATGAAGCGTGCAAGCAATGCAGAAAGTAAGTGTGAAATACATTTTCTCTCAGGACATAATTAATAAAGTACA
CAGCATGTTGGTGGGAAAGGCACATAGCAGAGAATCCAATAAGTTAAAGCGCTTGTACAGGCCTCACTGTACATTACTC
AAGATTTCCCAGACATATTTACTCAACATAACATTCRAAGGCTGAATCTACACATGNNNNNNNNNNAAGTTTAGATCAA
AAACTTCATTTAGAATTTTAATTTAACAAATGTAGAAAATGATCTGACCCAATGTTACTGTTCTGATACAAATAATTTG
AATTATATCGCCGCAAACAAATTTTTAAAAATTGGCCTCTATTTTAAGTAGGGATATATAAGTTATGGAATCCGCACTG
AGCTTTAAATAGGTCAAGGTTTACGGTTACCCTAGTTTGTTGGTAATTGGGAAGTTAAGTTCAATCATAAGCAAGTCCC
AGGATTCAACATGACACAACTGTCAGCATCAACTCAGGGATACATTTTCAAACAATTACTACTCCTGCTGATACCATGA
ACATTATTTTAAAAAAGTCAATAAAAGTAAAAGATTGCACATGCAATCAATGCTGTCAAAGAAAATGACTATGCCCTTA
AACCTGTTGTACATAAA
>00283 18 reads, 811 bases
AGCACCACCATCATACTCGTCGACTKMAGWCTATATAAAAGTCTCTATAAGCTTAGGTCCAATAGGAAATAAAGCAAAT
AGTACTACTGCCAGCTTGCTGTGAATTTTAGTTAAATTATGAGACACCTGCTTCATATAAGTTTTGCCATTTTTCTGGT
ATCCAAGATATTTCATCTCATCTGGAAATACTTTGGCTAGGTCTCTGACAACTCTTTGATCTACTTCTGTATCTGAATT
TTGTACCAAAAGGAATAAAAGCCTTGGTTGATCCTCTGTTAGATGCAGCACTAAGCGTTGTAATTCGAAGTCCAAATCT
TGAAAGAAAGATAATAGCAGCAGCATGCCATTGAGCGCATGTAACATGACTCCTTGGCCAATACCGATATAGATGTGTT
CAATGGAGTGCCACCCATCCGGCTCCTCAATTTCAAAACCTAATGATATAAGTAGACCTTTCCAACTATTTAAATCAAG
AAATTCGGGCGCTCGTTGATGGTCAAATGATAATTGACAGTTGCCGTTGAATAAAGCTTCTTTGCCCTGAGAAATCACG
TGTTCTAAGAATGCCAAAGTACGCCTTATAGCCACTTCAGTAAAACATGACTTTAACATATTCAGAAGATGATCTTGCC
ATACCTCCGTTGGCCTCGTCTGATCCAGCATGCGCCTTATCTCTTCAAATGGGTATATATCTTTGATAGTAAATCGATG
CGCAGCCCTGTACTTTATTATGGAAGTCATGGCTCGCCAAGACGCGATATTCAAACACAATGACTTTACTTTCCCTCAG
ACAGAAATTTAAGCATTACCC
>00284 14 reads, 800 bases
AAAAAAAAAAACGCTGTAATTATGTATTTTATTTTGCATTCCAATCGAAATAAACAATCACAATCAAACAAGAAGAACT
GCATTGATACAGCCATCATTTTCAGGATTGTTTGTAACTTGAGCATATTTACCCCAAACTACTTTTCCAGCATGTGTGA
CAAGGCCCAATTCACTAATGTTAACCTCAATAATTGTTCCCTTTGTGATTACACCTAAACTTGTATACATGGCTGAACT
TGGGTTCTTCTTCACACCAATTATTGGCAAAAAGAATGAAGCTTTCAACTCTGGGTGTGTAACATTTGCCTTTTTGAAT
CTGAGTCCCATTGGTCTAATAAATCGTTCAAATTTCACTGGTTTCCTTGTAAACCCATCACCAACAAATGTGACTTTAG
TGACCATACGTTTCCAAGCTTTTCTCTTTGTTTTTCCTGTTTTTACAACTTTAAAAACTTCAGCTTCTGAGACACCCTT
TACTTTTGGTATTGGCACATCCCATTTACCAGCTTTTTCTTTACGTTTCTGCTTTATAGTATTTGAGAGAATTTTAGCT
CTGATCTGATTTTCACGCTCCAACAAATATGTTGGGTTTCCATATTTAGAATCAGTATCAGATGCCTTTTGCTTAGTCT
TTCTCTCTTCATGCATCTTAATGGTTTTTTTCATCTGTATTTTTTCTGAATGTCTCTTTTTGTTGTATATTTTAGCTTT
GATGCCTCGCAGTTTCTTTGCTTTCTCTGCCATTTCATGAGGCAGACGGCCTTCCTTCTTTCTCTTTCTTTCTTCATAA
TCAAGTCTCC
>00285 11 reads, 915 bases
ATAGGGATAAAAAAAAAAAAAAAAAYKWBWATTKAAAGTATYTTTATTTATAATTCACCAGAACAAGCACAATACGAGT
GTAAATAAGTGTTACGAATAATCATCGCTAGTGTTGGCTAATCACAGTTTATGATTTGCAATCTAGGGTGGTGCAGGGT
GGGTGCTATTAGCTAACTGCAGTGCCCATGTCTCGAGACCAGCAATGCCTTAGCTGTTTATCCCCGACTTTCATTCGCA
TTGTTCTCATTTCTTTGTGATGTAGTTTGTGTCCGTTCTTCCCTCCCCCTTTGTTTGCTCCATCTATGAGCAAGTCTGC
ATTGTATGCTACGCCGTGGGTCGTATCAAGGTATTGATTACTTTGTTCCAAGAAAAGACTAAACCTCTTATATCAGGAA
ATAACTGCTCTTCACTCACTATTTCATTATAATGTGATGTTACAATAACCCCACGAATCCTAGCACCACTCAAAATTGT
TGATGCTTTTTCTCTGATAGTGACTTGTGCAACGTTAGGGCGAGTAATGTTCCAGGTATCTGTTCCTGCTGCCTCGGAA
CCATTTATCACGATGCTTTTAAAAAGATAATATTCTGATTCACGCTTTAACTTCTTTTGGAAATATACAAATTTCAAAT
TGTCATCTGTAAATTCCACCTCAGCTTTGAATACTACAATGTCAACGTCGCTGACAAGGCCGTGTGTACAGTTTGTTAT
GCTGTCTTCTTGCCTGTATTCAAATAGGGTTATCTTCTGTCCGTGTGAATGAACACATACGAATGTCAGAAACGTTAAA
GTGTAAATAGTCATCATGTCTAGTGTTTGCTTTTGAAATTGCTTTTATTTTTTACACTTGGCTTTTCTTTAATTCTTGA
TCTATTTTTTGGCTCCGTAATCATTTAATCATATCGGAAATTTCCC
>00286 13 reads, 1059 bases
ACGACTTGGCGAGAAGGCTAGAAAAGTTCTWSWSCGGTAGCAATTTTCTTATCAAAATGTTTAAAATGTCAATGTTTGA
GCCTTAGATGTTGAAGGTGCATCTTCTTCATACTCAATATGAACCTGGGCTTTCCTCTTTTTGGGGGGAACTTTCTTGC
CTTTAGGTTTAATTTTTTCTTCAGCATCAGAATCTGAATCCGACTGACTTGCATTCATGTCCTCTAGATCTGAAATGTC
ACTTTCATCAAAATCTTCATCAGCTACATATTCCACATTCCCATCATCATCTTCTTCCTCCTCAAATTCCAATTCATCA
TTTTTTAATTCATCTTCATCCTCTTCCTCAATTTCCTCTTGTTCTTCCATTTCTTCATCACTAGAAATTTCTTCCTCTT
CAGTCACTTTATCAAAAGCTTTTTGAGGGAAGTTATAAATGTCTCCATAAGTGCCTTCCTTTAATCGCTGTAGTAAATT
CTTCTCTATGACAGTGTCCAGTTGGGCTGCTATCAATGCCTTTTCTGCTCGCCTTGATTCTCGTCTTTCAACCTTTCTG
CTTAATGGCACAAGTTTTTTCTGTCTTTTCAATGTGAGTTTCCTAATCCTGATAAGATATTGTGTAATTTTTGTCAACC
TTTGTTTACACTTATGTTTCATATACTTAGGCCAGTATATCAATTGTTCATCTATCTGTTTAAGGGCTTTAGCATAACT
CCTTGAAAGCTTTACTTTTTCCCAAAGCCTTCGAGGAAAGGCTGCTCTTTCTATTGTTTTCATGTATAAATAACACACA
CCCTTTTCTTCTCTGACTGTTGCATACTGACTGTTTGCTAATGGACATGTTGATCGATTACACAGGCCAGTCAAGCTGA
ACTCATTACGGCAAAATGTTTGACTTTTTGTTTTCACTTTAAAGGAACAGAAAGATCCATTGATTATGCTCCATATGAC
ATCGTCACTCTGCATTGTTTATAGCTGTTTATATTACGTCTGGACTTTTGGGTATTGTTTGGGTCCCAAGAACATGTGT
AAACACCKKACCCTGTTATCCCTATTTTTTTT
>00287 5 reads, 1403 bases
TTTTCTATCACATCTCTTTAGTTTCACTTTGCTAATGATTTCTTTAGAACTCTATGTTTGTAAGAGGGGTTTGTCACTT
GTCATAACTTGTTATCTCTACACCAGCAGCTTGTAACTATGCTGTATTTCAGAAATAACCCTTTCATTTTTGTTTCTCT
TTCTTRMTGGGACTAGGGCCAACAACCGTTACTACTACAGGAACAAAGCCACTAATCGAATACAGTGGGAGTACCCAGA
GGTAGAAGGAGGAGACAAATCGGGAGAGAAAACGGCTGCTACAGAGACTGAAGTTGTTTCTACCAAAGGGCGTGAAAAT
GTAGTTGAAACAGATGAACAACGTAAGCAACGCACTAGTCGTAGCAACCGACACAGAAAGAGAGATGAAAAGGAAAGAA
GCAAATATGACAAACGCAGCTCATCCCATCGTTATCGTAGAAAGCGTAGGCGGAGACGTGATCACAGTAGTAGCAGTGA
CAGCAGTGTGGAGAGCCGGCAAGATCGACATCATCACAAAAGCAAGAAGAAGAAAAGGCACCGCACAGAGAGGTCTCCA
AGTGTTGAAATAGTTGAAGACAGCATTGAGATTATTAAGATTGAAAATTCCTCTCTGAATACATCGGCAACAGCAGCCA
ATTTTGAAACTGCCGCTACTTCATCACCACTCATCGAAACGGCGTCTTCCACACCACCAGCTCCTCCAGGGGGTTACAC
AGATGATACTAATACCATGCAAGATATGGAAGAAAGTGCTGATGAAACAGCTGTGGAAGATTTTTCATTCAACATTGAT
GGCATTTCCAACAGCATCACACAAGATAATACTTATTCAAGGGAGGACAATGCCTTAGGCATGTTGAGCACAGCTGTGA
TCTCCAAACCACCACAGATTGTCCTACCACAGATTTCAGCTCCACTAGTGCCAGACCCATATTTAGCCTCAGCTGAATT
AACCTTGCAACAAGTAGTGTCATCAACCCAATCCACCCAGTATGCATCTCAACCAACAGATTCTTTGACGCAATCAATC
AGTGAATCTGTCTGTGAATCAGTTGAAGGCAGCACTGAATCTGAAAAGCAAGCCAAAAAGAAAAAGAAAGAGAAGAAAG
CCTTGGCTACTGGCTCCAGTATCATGATGAAGAAAAAACATATGACATCTATGGTACAAAAGTGGCAGAAAGTCAAGAA
AGAAGTTGAAAAAGAGGATAGAGCCAAAGAGTTGCGTCAGGCGGCCATAAGGAAGAAAATTGAGGAGTTGAAATAAACT
AGAATATAATTATAATGAATGTGGGAGTGGAGATTACTAATAATTTACTCTGTGTGTATGAAAATCTGATTTGAAATTT
GTGGATAGTAATATGTGTGATNAGATTTGTTAATAATATTGTGAAAAATAAATTACTAAG
>00288 8 reads, 1264 bases
TTTGACTTCTGGGCTAGTTTTGGGGGAGAAATAAGGTATATTACTATAATCACTCTTAACTTGCATAAACAGTTATATC
TCTTTCAATAGAATATCTCATGCACTGTTCAACAAATTTACAAAGAGATTTAATATCTTTTATAACTCAGAAATTCAAT
ACTTGGCTATTGAGTGTTTCAACAACAATTTTAAGGCGCAAAAGTGGAAATAGTAACTCAAAATAATAGCTTATTTTGA
AACTAAGCATAAATACTAAAGAAATCGAAAATTTGATAAGATTTGCTTCTATTGTGATTTTATTTTTTTCATGTTAATA
CTCTACTCTAGCTTTACTTTCAATTTTTTTAGCTGGTTTTTATTGTATACAGCCTAGTTGTAAATATCACACAGACCTG
CACTACAATCATCTCAATAGATAATTATTGTAATTCTAATTTGAAAACCTTATACAGCTTCTTTTTTAGAGTAGGGATT
CTTCTCTGATTCATCATAGGCCTGAATACATTTGGCCATCGTCTGTGAAGCTCTAGAGATTGGGTCCGTCATAAAAAAG
TCTCGTAGTGTCAACTTGTTGGGAACAATGGGATTGGGGCACGGCTCTGTGACTTTGGGCTTTGATTCACTCTGTAATT
TGTAGGCCTGACTTTCAAAGCCAGATTCACTGACTTGTCCTGGGTAGTTAAATGATGGAGAGATCTCAGCAAGTCTGGA
GCGGACATCTGATATTTTCTCATAGGGTAACGTCACACCCAAAATCTCAGAAAGAGCCCTAATTATTTTCCAGTCATGC
CGTGCCATTCCAGGTGGGCTCACGGCTTGTCGACCAATTTGAACACGCCCCTCCATGTTAACATATATAGCATCTTTCT
CTGTGTATGCTGCCGCAGGAAGAACAATGTCAGCTATCTGTGCTCCATAGTCTCCATGATGACCTATGTAAACAATAGT
AGAGTTGTAGCAAAGATCTTGTCTTTTGAAAGAGGCAGCATCAGCTCCAAGCATGAATAGCAGCTGAGGCTTCACAGTC
TTTATGGCATTCACACCTGGCTGGTAGCCGAGGTCAAGGGCACCCACTTGCGATGCACTCTGCTGTAGCACATTGAATA
TTTTCCAATCTTTATTTGAGCAGGTCTTTTTAACATTTTCAGATAACTCCCTCACAGCATTAAGTATAATGTGACTATC
ATCACGTTGAAGACAGTCTGTTCCAAGAATAAKCAAAGGCTTCTTAGCCGTCGACAGAGGGACCGTCTCTCCCACAAAA
>00289 3 reads, 1299 bases
AAAGTTAGCTGTAAACATCAAATTCAAATAGGATATACAGCAAATAGTCAAGTGATGTAACCAAGCTGAAAAATGACAC
TTCATTAAACACCGCAATGACCTCTTGCACAAATAAKWCTRATKASKCMRTTAATGAGCAGAGCTAGAACTTGTTAAAA
AAGAAACTCCTGTTTTAGAAGATGTCAGATTGATAGCTGCTGTTCCTTCTCTGGTCAGAGCAGAAATCAAGAAAACTGA
GTACAAAAAATTGACAGTGTCATGCATGTTTCAGCCACCATACCCCACTGTTCCTGTTGTGACAGAACTCAGATCAAAG
ACATTGGCAGATAAATTCTTAGATCGGTTGTCAAAAGTTTGTGATGCTGAGGCAAAAAAGTTAACAGGAAGACCACAGA
CCATGCACATCATAAAGCTTGTCAAGACATTCATTGAAGAGAACCCTTTGTGTGTGTGTTCTGAGGAGATTACCTCACT
CAAGAAACTGTTGACTGGGGAGCATGATGAGGTCAAGCTCAAACAAAAGTCATCTCAAATAGTTGTGAAGGTTCACCAG
GAGCTCTACTTCATGCATCTGACACTGTCTGTACCTGAAACGTATCCGGTCACACAAGTGGGTATTCAAATTAATGATC
ACAATTTCCCCGAGTTTCTACGTGTGAACTTTCAAGGTCAGGCCGCTGAGATAGCAAGACAGTGCGTCCATCCCCCCTT
AAAGCACAACCCAAAGGACCCACCTTTCATACCCAAGCCCTCTCTTTTACCCCTCTGTCAATATATCATCAACTGTGTT
AAAACTTACCCTCTGGAAAAATGCCCTTTGTGTCTTGAAAGAGTATTACCTACTGACCCAAAGAATGAAGGTGCCACTA
AAGGAAAACAAAAAACTGTTAAAGTTTACTGTGGTCATCTTTTCCACTACATTTGCTTAAATGGTTACATGAAAACACC
ACCATTTTCAGATGGCAAAAAATGTCCAGCTTGTAGTAAGCAAATATTTCATGAAAAGTGGCAAATTGCGGCAGAAGTG
ATGGAGACCAGATGGGCTCACAAACAAGCCAAGCAGAGAGAGTTGGAGGAAGTGATTGATTTCTTAGATTAGCTCTATM
TGAATAGCTCCAAACTTACGGCCTCAGCAATTAATGCGATGACAGGTTAACTAAGTTTCTGCACACAATGCTGTACATG
AGATTTTTTTGGCCTTGTGCAAATAAAAATATTGTGACCTTCAATTTACAAATAGGACCTTTGATAAAGAAGAGCCATG
ATGTATTTGCTTGGTTGCCTCCCCATGAAAAAAAA
>00290 7 reads, 1132 bases
GTTGCCATGAGTACTTTGCCTTTGTAAATGAGGTACCGAAGCAGATCTASACTGTGACAKTACATGTAAGATTGTCCTA
AGAATCCGGGCCATAGACATTTTTTACCTATCAGAAGTTTCAAAAAGGACAACCTTCCCAGTCATATCCAGGATGAGGA
TATTGTAGAGTTCATCAGAATTTTAGGCGAGCTTACCTTAAGAGTGAGTTGTCAAACCACAAGTGATCAGAGGCCAGAA
TTTTGGCCTGGTTCAGAGTCTGAATATCCTTTTAATGGCAAAGGAACCAGGACAGATAACAAGGTAGCAACCGGGACTG
TCAGATATGCAGATTTTACTCGGCGGAAAAGAAATTTAATTTGTATATGCAATCGTTGTGAAAAATCTAGCAAGCCCCG
CAAAATTATTGGTGAGATTATGATTGTTACTGCCAGACACGTAGTCTACGATGACTTTGAGGCAAGAAATACAACGTGC
AGATTATATTTTGATAATACTTCCAGCCCATTGGTCACGCTTGAAGACTGGGTTTGGATGGAAGGCAGCACGGAAGATG
ACTACTGTTGGTTGCAATGTGAGACATGCGATAAAGAACTTGTAAAAGACTTGAAGATGAAGATCGTTCACATGAATAA
AATGTGGAAAATGATAAACTCTAGGTACTGGAGGTCCAGAGATGAGAATAAGTTGGCAATCATTGTCTCACATCCACAT
GGGTGTCCTAAGCAAGTTTCTGTAGGCCTTTGGGAAAAGAAATGGGTTATGAGAAGTGAAATGTTGATTCAGTACACAT
ACACAACAAGCACGTGCCCCGGTAGTAGTGGTTCATATGTTTACATTTTGGGGCATGGCGACGAATGCTCGAAATTGAA
TGCCCACCTTGTTCACTGTGGCGTTAATAAAAAAGGAGAAAATTATTGTCGTACTGGACTGGATAGGGAGAAAAAAGAA
ACTCGCGAATTCAGACCAGAGACACCCCTGATGGAATTTAATGTAACACCCTATCATAGACAAAATCTGTTACAGGCAC
TCGTTCTTTACAAAAGATTATTTCGCGTAAGATTTACATCTATATTTGAATCTCTAACAGAGTTGGTTTAAATGTCGAT
AGAGTGTTGATTGTCCTGGTTTGATC
>00291 13 reads, 1109 bases
CCAGACCAAAGTGTAAGTATCTAAAACGTAGACGATGACGGCCCTTTTGACTCTGGTTGGTTTGATTCTTGTACTGGTT
GAGTCCAAAGGTTACAGTTCGATTCCTGACACCCCAGCCAGTAAGAGCTGGTACCGGATGCTGCATCCCCCACTTGGAC
TGGTTCTCATCATCATGACGTTTGTCAATCCACTGATGGCACTGTTTAGACCTGAGCCCAAGGCGCCGTCCCGCTCGAA
GTTTAACTGGATACACTGGGGTATCGGGATCCTTGCCTGGGTACTTTCTTTTGCCTTGATGCTAATCGGCCTTGACCTA
AATAAATCACAATCTGACGTAGAGGCTATTTATGTAGTGTTCGCCTTCATTGCCTATCACGTGATCATTGAGATCCTAA
TTAGGGCACTGCCTTTCATTCTTGGTGCCCTTTTGGGATGTTGTAGAAAAGACTGTTGTAAGAGCAAGAGAAGCTATGA
CCTAAACATGAGTGACCTGTCCAGTAGCGAGGTGCCCAGCATGGCCGGGTATGACGTGTCACGTGATAAGGATGATGCT
GAGAAGACGGTGGCCGCCTACCGTAGGGAGAACGTAGTTCGGACTTTCCTGCTCGTCCTTCACATGCTGGCCACTGCTT
GCTTCTCTATCGCCGTGCTCTTCTTCTTCCTGCGCCGTCCAATGGACAGCTCCCATGCCCACGATGAGCCAACGGTCCG
ACTGGAACATGATGACAGTGTCCGAGTCGTCGGGGCTTTTTAAGTCTCTCAAACATACGAACACATGGCTAAACGTTCT
TTGACTCAACAGTTCGTCATGATGTAGCCAGGGTTAAAGTAATTTRAATTTTGATAAATCAACTCACAAAAAATATACG
TTACATGAAATGAATTGGTCAAATCAAGGAATAAGAGTGGTTAAGCAAATCTTGAATTTTATTTTGAAATGGTGTTATA
CCATAAGGAAAACATGTTTCTCTTATTTTTGTACGACTGAATAAAATTATTTTTATTTCTTTGACACTAGAGAGTTTTT
TGTTCAAGACGTTACTTCCTATCTTGATATAACAAAATTACAATTTAATTTGTTAATGAATTATTTATTCATTAAATCG
AAG
>00292 3 reads, 1280 bases
TAGTTCGCCTGGTTTGCGTCCACGTGCAGGGGCTGCTTTTTTTACCTGGATTCTAAAAAGTGAACAGAAAATGGCCGCT
GACCTACTCGATGGGGGCGACCATTTCCCTGATGTCCACGAGGTATTGCTCAGCAGGGACAAGCGATACTTGGCGTCCA
AGAGTCTCATGGAGCAGAGTCGCCTCACGGCCCTTTACGTCATCTTCATTCTCCTCATACTCCTCATTAATGTCTTCGT
CATTGTCGTCATCCTGCTGTCCAAGGTCATGAGGTCATCCTCCAGACACATTCTTATGTTGAGTGTGTGTCTCGGGGAC
CTGGTCATGGCTGTCTTCGTCCTTCCGGTTTTGCTGAACTTGGGCATGCGATACGGAGACACAGTTGGTGACTGTCCGA
CCTTCTTCGCCATGCGACTCTTTGCAGATTTCTTCATCCCATCGGTCACAACACTAGGAGTCTTAGCCTTAAATATTGA
TTACATTCTAAGACTTTGCTGCCCAGTGTACTCGGAAGGCGGGAGTCGGAGTGCGATAATCGTGGCGTTGTTCGTGCTG
CCCTGGGTGATAAGTGGCGCCGTCCTGGCCCCCCTGTATGTTGATGGCATGAACAAACTCTCCAAGACTTGGCTGCAGA
CGTGTAATGTCAACATGGGCGGCTTCTTGACCAGGACGCTTCTGATTGTCAGCTACTTTCCACAAGCTGGGCTCCTGCT
ATTTTTCAACGTCATCGTCTCTATTCTGTACTTATTTCGACGTGAATCCTACAGCCTCGACGTGTGCGGGGAGAGAATT
CGCGCCCCGGTGGACATCTGCCTGGGGTCCTTCACCACCATGCTGCTGTACACGCCCGTATTTCTGGTGACACTGCTCA
CCACAGAGGGTTATCTCGGCTGTAAACACGACGAGGAATGCAAGGCCCTTAACACCCTCAACACAGTGGCTGTCTGGTT
CATGTTTACTAAATCATGGCTTCTCCCCCTTTGCTGGTTCGCCTGTAAAGACACCCGAGCCAGCATAAAACAGTTACTG
GGTTGCTGTTAACGGATACCGCTTTTTTATCTCGAAATTTAGAGACGCAGGCCTCTCCACTAGACGTGTGGGTGGAATT
TCTTGTTTTGACAGTAGTTGAGGACAGTTTGCGAAGCTTAGCAGCAGAATTTTAATTTGTATAATCATGGATGTGTTTT
TCTTGTGCAATGAAGACTTTAACTATCTTGCTTTCTGAAGTGTGTGCAGAGCGTTGGAATCATCCTGTCAAAACATAAT
AAATTGTTGGAGAAGT
>00293 9 reads, 1432 bases
CCCATWATWRCAGTSAMTTAGTCATTATCAACCGCATACTCTCGATAGAACTGCCCTACAACTGTCACGTGAGATTGCT
GGTATTCGTTCAACAGATGCAGAACAAATGTCAACAAAGGATGTTTCATTGTTTTTGTTCCTTGTTTCATCCTTGATTC
TGACAGGACCTTGCAGTTGCTGGCTGATCCCCCAATGGTGGACTCAGTGCTACACCAACCCACCGATAGGATGTTTTCC
GACCAGTTACCCCTACAACAACACGGCTGGTCTCGGGCCCCAGAGTCCCCAGGTCATTCGTCCTCAGTTTCATTTCTAC
AGCAGCCCTGGCCAGCACTTTACAGCCACGCTTGACCAGCTCCATGAGGTTCCCGGCAGTGTGTTCAACTCTTCGGTCA
AGACGGTCGTCATCATTCATGGGTACCTCGAAAACATAAACACCGGGTGGATAGGGCAGATTACCAGTGCGCTATTACA
GAAGGCAAGCGTTAATGTTGTTGTTGTTGATTGGAGCAGAGGCGCCAAAAGCTTGATCTACTACCAGAGTGCTGCCAAC
ACGCGTGTAGTTGGTGCAGTGCTGGCGTTACTACTACAGAATCTGGTGTCTATAGGTTCAGACCCTGGTTTAATTCATC
TCATTGGCTTCAGTCTCGGGGCGCACGTGGCGGGTTACGCTGGGAGTCAGCTGAACGGGATTGGAAGGATAACAGGTCT
TGATCCGGCTGGTCCAAGTTTTGAAGGAACCCCACCCGAAACCCGTCTTGACCCCACCGATGCCTTATTTGTGGATGTC
ATTCACACTGACGGTGCTGCGGGAATCGGCTTGGGAACGCTGGAACCCATGGGAACAGTGGACTTCTATCCCAATGGCG
GGAAGCATCAGCCAGGTTGTGCAAACCATGTTGTTGACAGATTGTCCGCCATGTTAGGTCTAGGAGGTTCTTCCGTGTT
CTCAGCTGTTGCATGCTCACATATGCGAGCAACACACATATTTACATACTCTATAAACAACAACTGCACACTGCCTACA
CGCCGCTGCCCAACTCACACGAGGCTGGCTCGCGAGGAATGTGTTTCCTGTGCGGACAACATGTGTCCTACGATGGGCT
ACGGYCTGCTTCCGGACAGCGTCGGGGACAAATTCGCAGTGTATCGCCCGGACGCCCAGGGCGGAACGCCATTCTGTTA
AGTCACGTGCTCTGGTGTGTCAATTTACTTGTTAGTTAGAAAAGTATTTAAACTGTTTTACCATGCAGCAATACATAAA
TCCCTACATNTGTATTTAGGGATGTATCTTTCCTTAGATTGTTATTGAATAAAGACAAAATTCATAGTTTGTTATGGAA
CGATGAAAGTTCCTTATTTGTTAACTTTAGTAAATACTCTAACATTAAAAATAAACGTAACTTAACTTATTTAATAAAC
GGATGACTTT
>00294 17 reads, 1794 bases
CGCATTTGTTTGTTTTTTTTTTTCGTCTTTSATWMGCAAAGCTCTCAAACCTAGAATAAACTCTGAGATGCATAAGGAA
AATCAATTCAACCATAAATACTAATTTAATTAACAGATTTAAGATCACGAGTCTCCTTTCAAAGAAGACATTCCCGCCC
GCATTATTTCGTCAACAAGGAGGAGGTTGGTGGCTATCACAGTACATGAATGTAGCAGCTGTCTTTTCACGTTGTAATT
ATCCAGAATACCTTCATTGATGGGAATCATTGCTTCACCTGTTTTAATATCAAGTCCTACAGCCTGCTCTGTACCCATA
TATTCTTGCTGCAACTTGACAATGGCTTCCTGCGGGTCCAGACCTGAATTCTGGGCCAACACTTTGACAATGATTAGAA
GAGCCTCAGCAAACGCTTGGACACCAAGTCTAGCACGCCCCTTCACAGTGTCTTTAAACTTCATAAGTTCTTGGTAAGC
AGCTATTTCAAATGCCCCAGCGCCTGGTAGAACACAATTATCATCAATAGCATTTTTGACTGCTCTCAGTCCATCTCTG
ATTGCATCTTTGATCTGAGTGATTGTGTGAGCATTGGGTCCTTTGATTACAATTGTAACTGAGTGGGGATCTTTGCAAT
CCTCAATGAATGTAAATTTGTCTTCTCCCAAAACAGTCTCATAAACATGGCCAGCCCATCCAAGGTACTCTGGTACCAG
ATCATCAACTGAGTTGACAGCCATTCCACCACAAGCCAGAATAACTCTTTCCATATTCCTTCGCTTGGCACGTCTTAGG
GCCACTATTCCCTCTTTAGCCAGTAAGTCCAGGGACATTGGATCAATACCCTTCTGATTGATTACTAGAAAATTATTCT
TAGTGCCATCACAAACTTTCTTTTTCATCTCAATGATTTTCTTCACTCTATCATTGATAAATTCACGTTCAGCAAGCAC
CAGCTTTTCCCTTTCTGCAGCACTCTTGTAAAAGAAACCAGAATTAACCTCCGTTTTCTCATATTCAAGGGACACATTG
CATGTGAGAATGAAGACATTTTCAATGTTCTTTTTCATATCGGGGTGTCTTGCCCCATGATCAAGTACCATTCCCCGAA
CCAGAACTGAGTCCATATCTGTTTTGTGTCTCATTTCTATGGTCTCAACCATGTGTAGGTCGATTGCTCCACTGGGTTG
CTTCACAGCCAGCACAGCATCCACAACATGCTCAGTCAATAAATCAGCCAGCTCCTGATAAACTTTGGTGCGGAGTGAA
GTACGACACACTTGAATCAAAGTATCCCTATCGATGGTCCTCTTGACTTTAATTTGGTCCAGAACTTCAAGTGCTTTAT
TACGAGCAAGTTCAAATCCTTCAGTGATCAAACGAGGATGAAGGCCTTCAGCAATGTAGAGATCAGCTTGTTTCAGAAG
TTCACCAATGATAAGAACATTTGAAGTGGTACCATCTCCGGTAACATCATCTTGAGCAGTTGCCACACGGGCGATTAGG
GAAGCAGTTGGATTTTGTATTTGCATCTCATGAAGCAGAACATTGCCATCTTTGGTAAGCTTAATATCTCCAGCTCCAG
ACACCAACATCTTCATGGTGCCTTTAGGTCCCAAATTTGTCCTAAGAACATCTTGAAGACCCTTAGCAGCACTTATATT
GACAGCAAGAGCTTGAGCTGCCCGGGCAACTTCAGCTTTAGGATTCAGTGATTTGATGGCAGACATTGTTTAACCTTTT
TTCTTCTTCAATTCGTTGTCAAGCATGTGCAATAAGCCGACAATCGGAAGTAGATT
>00295 2 reads, 962 bases
CCTATTGTCCCATTACAAAAATAGGGCCKGATCTCGGTAAAAAGGGTGACTTCTTTCGCGGACATTCCTTGATAACTCA
AGACAGTAGTCAACAAAGGACTTAAATTTGGNNNNNNNNNNTAGTAAACTTCACATCGTAGACTRAYTGWSACTGAGTA
GGGGGATAGGAAATGTCTGAGTCAGGACGTGCCAGGACTGGTCCAACAGAAGGTACCAGTGGTCCTCCAGCAAGTGCCA
ACAAATCAAACACAAAATTTGCAAAGAACCTCAGCACCTCAGGAAGAAGATTACAGAGAGAGCTAGCAGAGATAACACT
TGATCCCCCACCTAACTGCAGTGCTGGTCCCAAAGGAGACAACCTTTATGAATGGAGCTCAACAATCCTGGGTCCCAAG
GCTTCAGTATATGAGGGTGGTGTGTTTTTCCTGGATATCCAGTTCACAACAGATTATCCCTTTAAGCCCCCAAGGGTTG
TGTTTCGCACCCGTATCTACCATTGCAATATCAACAGTCAAGGTGCCATCTGCCTGGACATTCTCAAAGATAACTGGAG
TCCAGCTCTCACTATCTCCAAGGTGCTTCTCTCAATCTGCTCCTTACTCACCGACTGCAATCCCAATGACCCTCTAGTA
GGAAGCATTGCCCAACAATACTTGACCAACAGAGAAGAACATGATCGCATTGCCCGCCAGTGGACCAAGAGATACGCCA
CGTGATTGATCATTATTTATTGTACAAATGTAATGTTAGTCCATCTGCCACCAAGGAATTCCTCAAACTATTTCTCAAA
TATCTCATCTCTATTCCTTACATTACTTTCTGACAAAATTTTAACATTATACCTTTACATTAAAGACCTAAGGTGAACT
GCTATGTCGTGTTCCATTTTGTAAAATTTAAAATTTTGAAATTTTTTGGCAACCAATTACCCTATCAAATATTATTAAA
ACATTTAGACTTTT
>00296 6 reads, 1170 bases
AAAAAAAAAAAAAAAAAACGAATACAATAACGAATCCAATGACAGAATCATACATACGATCATAAATATAGCGTTCACA
ATAATTATCAATATTTTCATTCTGAATGACTATTTCACCTGCTAATAATATTTCATTTAAATTATAATCACATGTGAAA
AATCCATGTCTATCTCTATTAAATGTATATTTACCGACACTCTCAAATAAATGTTTTTCAATATGATTATAACGATCAA
GCTTCACTGTTTTTTCAATTATCATTTTTTTTATTACCCCGTGCAGTCCAACTTTTTCCCAAGCCTGAAATTTTCATAC
GGCAACTTGATGATGGAAAAATTACATATACAGTTTCTGAAAAATTGGAAATTTTAGGTTTTTTGGACATTAAAGATAT
TGGCAGCCCTCCAACAGTTGCTAGACATTTGGTATTACCTAGATCCACAAAAGAAAAATCAGAAGCTAAAGATAAAGAG
GGCAAAAATGTTAAATCAGAAGATGATGATGAAAGTCAAGATGACGGGAAGACGCCATCATTTACAGTTCTTTTGCATG
GCAGTTTGAGGGTGGAGAGCATGGTGGCCATCACCAGAGTTTGTGATGACTGGTATGGCATGATCTATTCATGGGCAGA
CAGTAAAAAAAAAGTCAAATTTAATGTTGGCCTTATTTGATCCAGGGCAAGATTCTATTCCATGGATTGGATCATTTGA
CAACCTCACCTCTTGTAGAGAATATTCATCAGAAGATGAAGAGAAAAAGTTGCCATTCCCCGTTAAGCCCCTAGATAAA
CGCAGTTATGCACAATCTTGTGTTGTTTGGATAAAACCCTCTGGTTTACAGTCTGATATTCAAAAAGTCTTAAGACATG
CCAGAAAGTTGCCAGAGAAAATACACCAGTTTTATAAGGAGTTAAATCGTACCAGGCGGGCAGCTCTGTCATTTGGGTT
TCACATACTACTTGAAGCCATGGCATCTATGTTGGAAAGAGAGTGCACCCTTTTACCTGGCACTGCACACCCCAATGCT
GCGTTACAACTAACACATGCTGCAAATTTTCTTCGCTCAGATAATGCATTTGATGTCATGCAATCTGTAACACCACTTC
CTACAAATTTTTCAAGTGGTAATACAGGTTAAGTTGTTTATTTCAATGTTGCTGTAAATAAATT
>00297 2 reads, 783 bases
AACGCCTACCAACTGTAAAAATCARWWTTATAGACACAAAGTTACAGAGAATGAAATATGCAACTTGCAGTCTACTACC
AATGCTCCAAAATAAAAAAATGTGACAAAAATATCACACCCAAGTTCTTGTTATGTAGATTGAAACTATTGTGTGATTT
AAATATTCGTTAAAATTTACCATGCCTTGTACTCATTAGAAGTTTTGAATGTTGATACTCTTACGCATCCCTAAACATT
CAACTTCATCAATAAACAGGGTGTTGGCTTTGATTGCTATGTCTTCCTCCAGTTCCAACTGGTTGCGAACAAGTCCTTT
GAGTGAGCTGTTAGCATCTCGTAGACGGGCTTGCAGCTGAGCGACAGAGTCACTAATTTCATGTACCTCCTCAATGAGT
TTGTACTGAACAGCATCCCGGCAGAGTTCAACATTGGGCCTGTGTTGTCGCGTCTCAAGGCGTGTTTGAGCCACTTTCA
TAGGAGCTTCCTTGGCTTGGATGGCCATCTGCAAGGTAGCAATGTTTTCTTCCTGTTCCTTGATTTGAGAAATGACCTT
GTTGAGATTATCCTCCAGCTTTCCCTTGGTGTCCTTACACTCCCAGATACGATTGGCAAAGGCCACATTGGTATTGTCC
ACTTGTTTACGCATATCATTACTAGTCTGCTGCAGAAGTCCATCGATGCTAGATCTTAAATCAACAGAGTTCATCCGTT
CCCTCTCAGCATAATTGATGTTGTCATTTGAGAAATCCACCCATTGTTCAGGTGACACAGAGTTGGGTTCAA
>00298 2 reads, 1057 bases
TACTGCGTCATGKGTRRTACACCGTGTCGCTCTGTCAAGCGCGTTTGTTCCAGTTTCTGCTGGGTGTTTAGTTCAGCGG
TAGTTTCTAATCGAAGATGGCCAAAAATACGAATACCAAACTGCTCATCTCTGCTGTGGAAGAGCGGCCAGTTTTGTGG
GACAAGAGTATAAAGAGACGGAAGAACAAAAACTCAAAGGGCAAAGCCTGGGAAGAGGTGTGCACCATAATGAATTCCG
ACTTTCAAGAAATGGATGAAAAAGCAAGGAGCGCTTATGTCTCTCTGATAAAGAAAAAATGGAAGAACACTCGAGACGC
ATGGACGAGGAATCTAAAAAGGCCAAACGTCGCGAGGAAGTTTGTCTACGGAGAGCAGTTGCATTTTTTGCAGATAAAG
TCTGAAGCAACCAATGACAAGGAGTGTAACGAAGACCCTGGCAATACTTCTAGCGACTCCTCTCACATTCATACGAACA
GCCCGGTAAAAGTAAAAGCGCTGGACGTTTCAATTAATGAAAAGGGAAACAAGAGTGATCCCAAAGAAAAGACGACAGT
GCCACAGGAACAGTGTCAGGTATCTCCGGAACACTCGAGGAAACCTTCCCGGGACGTAGTCGAACCATTGCCAGCCAAG
GACGGCAGGCATATGTCGTTCTTCAAAGGGATCATCCCATCCCTAGACCCCTTGGAAGAAGAAGGGATCCTGGAGTTTC
AAGCTGGGGTCATCAGTCTCATTCAGAGTATCCGAAAGAGGAGCGCACTGCTGCTTGAGCCGACCCCGACCGTCACACC
GAAAAAAAGTCGCCATTGAAATTTAACCAGGATTTGTGAATGTTGGTGCGTGTCGTGTTCTTCCCAGTGCCTCTCTTGT
TACTGTTCTCAAACCTTGCTGGTACGGCGCTTAGCCTACGTATTTATATTTTCCGGGAGACTGTCTCAATCATCACAAC
CTTCTCGGTAATTAGGGGCAGATCACATGCTGAATTGTTATATGTGCAGTATCGTGCGGTCAGATCTGATTAGAATTAT
TAAACTTTCACTAACGTTTTAAAATAAAAA
>00299 2 reads, 1089 bases
CTATAGAATACAATCATTCGTATACCATGTGGTTGGATATTGCCTTGGTRWCARGGTAATTCTAAAGGATACTACTGAG
TCCAAAGCCAGGCGCGATTGTAACTCAAATAGGAGACAAAACTCAAAAATAATAACTTGACTAAGTCATTGTACTAGTT
AAGCTTATTAAAAACAAGTCACTAATAATCAATGATAAAAAGACATTAATAAAAACCAATTTAGTTTTGGCAAAAATGT
GCCTATAAAACTAATTAGAGAATGCTTTAAAATGAAAAAAATTCCTCTTGAAATATTTGCGGGTGATGATGAGCCCGCT
AGGTTTGCAGGGTGTTAGATATCCCCCATATCTATACCCTGATCATATAAAGCCCATCCCCCTAAATCCCTGCTAATGG
GTGGCCACACAGCCTATGGGGCCTGTGTTTGCACAGTGTTATGTTCCCCCACATATCAGTGCAGCACTATGCTCCACCT
CGCCTGTTTTTTTTACTTATTTATTTACTTTTTTGTACCTGTGTATGTTTGTGGCTGTGTGTGTGTGTCATGTTCATTT
CTGTGTAGATTTAAGTCAAGCTGTATTGAGTTGACATCACTCTATCAACAGCCTTTAGTAAACTTTTTTAAAAGACTAT
TTTCTCCAACAAAAGAGTTGTATCATTTAAAGGACTAGGGCTGAGAGAAAACTAAGATACTGTGAACCTTCATAAAGTG
ACAAGCAGCCAGGGTTAACCCCTTTGTAGAGCCTAATGAAATGTCAAGGTTATTCTTTGAAATATTAGAAGTTTGTAAA
ATATGAATTCCACTCTTCATGAAGTTTGTCATTTTATATCTCCAGCATTGAAGTGTGCCTGAAATTCAATAGATGTTTT
TAGKTTTTATTTGACAATTAAAGCCAATACACTTTCTCTCATCCCTTGTGCCTTTGTTTGATTTTGGTTGCTAGCTCTC
AGTRYASKSAATAAACCTTGTCTTGATTGAGGTCAATTTTACAAAATGTACCAGAGACTTTTGAATGTTTATTTGTGTA
TTGTTTTGCTGCTACAATGATCAGTCGAGCAGCAATGCATTAAAATTTATTCAACATTTGAG
>00300 2 reads, 1035 bases
ACATGACAAGGTTTTACCGGGACTSCARGTKACTTAGCGTACTTGCTCATTGTAAGTTAATTTTACACGCTGCCAAATA
CCCACATTCATCAGTGAATGGTGTCCTGTTAGCCGAAGACAATAAGAGTAAAGAATCTTCTAAGCCTTTAAAATATGTA
GACTGCATTCCTCTGTTTCACGTATCTCTTGGATTATCACCAATGCTGGAAATGGCCCTTCTCCAGATTGATGCTTATT
GTAAAAGCCAAGGCCTTGTCATAGCAGGTTATTACCATGCGAATGAGAACTATGGCGACAATGAGATGAATCACATAGC
AAAAACAATTGGGCGGAAGATTCAGGAAAATTTCCATGATGGTTGTGTGCTTTTGGTTGACAACAGTAAAGTTAGACAT
GATGCTGTGTCTCAGCCCTATAAAGTGTTCATACCAAAAGAGAATGGCTGGAAGGAAGTGGATAAAAAGAGCAGCTCGA
CGGAAGAGGAAATTCATAAAGAGCAGTGTGTTTATGCCCTTCTCAAGGCTGGTGCCCAGAGACAAGTGAGGGACTATGA
TAATCACCTTGATGATGTGAGGAGTGACTGGAGGAATCTCGAACTTAATGATATGATTGGGCGATGCACATAAGGTCAC
ATGAGATGACATGCACATGATGGGCAGTGTACATAATAGGATCTAGTATTTAGTGCCATGTTTACACCGTGTTCGTTCT
TTCCAGGTTTGTTTGCAAGTCAAAGTGCACATTGTGTATTTGTACTGCATTTCATATGGGCTTCTCCAGCTGGATCATG
GCACATATAATACTGTGGTGACATAATTACAAACTATTGCCCTTCTAGATTTGTCATTCAGTCATATTGTGCCAACTTA
TTTTTGGAGATTAACTTATTCTTGTCCACATTTAGGGCACAACATGGATCTGTTGTGTTAACAAGCAGTAGATTATTAC
TCGAGAGATACAGAAGTTAATGGGGTTTTTTAAATTTTAATATTTGATCTGTGAATCCTTAATTGGCTATATTTTGTTT
AAATTGTG
>00301 16 reads, 837 bases
TTTCAAAGGAGACATGGTCCAKCTAAAAYWYTGTGAATTAYRYRTAYGACTGCATAGCTTGCTTTCAGCCAACACACAT
TCACAACACACTTCTGAAAACCCAACCATATTCATATACTGGTGTAAATGAAAGCATTTAAATGCTAAAACTAAAGACG
ATTTATATCATATCCCTGCAGCTATTTGTTTATTGATTTTTTCCATAAGCCTCTTATCAAGTTTTTTCTGTCGTAAATA
AACCACAGCATATGATGTGAGCCCTACTAACAGAGTCAACAACTCAAACTTCCAGAAATCTGCTTCCTCAACAGCAGGA
GAAATATCACAACCAACAAATTCCTCTTTTCCATCATCACATCGAATCTTTTCTTTATATCCATGTTGTTTACAGTAAG
GTACCTCAGCACGCAATTCCTCTTTGGGGCATCTTTGGCATCGTGAAATTGATGTATATACTGGACATGAAGTTTCTTT
TGGCTCGTCTTTGGGCAGCTGTCTTGTATATTCCCAGTGACTTCGAAGAACAAGAAAAGCAAGCATAGATAAGACAACA
AAAGCAGCAAGGACAAGAATTCGCTTTTTAGTAAATACTTCAATCATCATGTTATCGAAACTTTTCTTGAACATAATTT
TAAATTCAACAATTATGAGATTTTTAACACGAATCCATAAAAATAGGCCACATATATGTTTGTTGATTTGTTTTAAGTC
AGTACAGGTCGATAAAAATTAATCTACATAACTCTAGGCTAGCAACTTCTTGTTTTTCCTTACTACTACTTTAACGTAA
ACAAAATAGTCATTTCTCACAGAATTGTATTTAATTTTCTTTTAAAT
>00302 11 reads, 995 bases
TTTTTAAACTGAATTTAACTTAMTGCACTCTAACTAGATTAATCTCTTTAAAGTGTATATAAAATCAAAGTGACCTCAA
TATAATAAGTAGTTCTTTATGATGGAAGAACAAGAAATAATAACAACGTTGAAAATATTAATTATTGGAGAAAGTGGAG
TTGGTAAATCAAGTCTCTTGTTAAGATTTACAGAGGATACGTTTGACCCTGAACAAGCTGCTACTATTGGTGTGGACTT
TAAGGTAAAAACATTAACAGTTGAAGGCAACAAGACGAAGTTGGCAATATGGGACACAGCTGGTCAGGAAAGATTCCGA
ACATTAACACCCAGCTACTACAGGGGAGCCCAGGGTGTGATATTGGTGTATGATGTGAGCAGCAAACAGTCTTTCAATA
AATTAGATGCCTGGTTGAATGAACTGGAAACTTTTTCTACCAAACATGACATGGTCAAAATGTTGGTCGGCAACAAAAT
TGATAGGTCAAATCATGAAGTGACCAAAGAAGAAGGTCTTAAATTTGCACGCAAACATCACATGTTATTTATTGAGGCA
AGTGCTAAAACCAATGATGGTGTCCAGTGTGCTTTTGAGGAGCTTGTTGAAAAGATCATTCAGACTCCAGGTTTATGGG
AAACAACCAGTAAAAATCTGACCTTGGGTAATCATGGTGCCGACGTTCACGGACAATCCTGCTATTGTGTGCTCTAATA
TTGACCCCAATGAGTTGAATGGAAGATGGTTTTATTTAGATACTTTAATGTTAGGGAGACAGTGTCAGTTTAAAATGCC
TTTTTGAAGCTTTCAGAAGTATCATTGTTTCATGTCTAGGGCTATTTTAACCATTTTTATGTGCGTATTGAAAAGAGGC
TTGAATATGTTGTGTACTTGTGACTGTGAGCACTGAACTATGAACCTCCTCATGAACACCATTTAGGTGTACATCTGAC
TATGAACACCACTGAGATCAATGAGCAAATATTTGTCTGAATCTTTG
>00303 7 reads, 1288 bases
AATTCCCTGCAGTATTTTTTTACTGACRTAYGGAACCATGATTGCATTGGCCGCCATTGTCGGCTGCTTTGCCGTTGTG
ACCTCCAACCCCGACGTAGATGTCCTGACGCTGGCCAGCGCTGCTTGCAAGTTTTCACAGCAGTTATACAAGGAGCTGT
CCCTGCAACACAATGTAGCCTTCTTTTCCCCATTCAGCGCCCACGCGGCCCTGTCCATAGCGTATCTCGGTGCCAGGGG
TACAACGGCTGAACAAATCAAACATGTGCTTCAGCTGTCCAGTCTCCCCGAGCCACACGAAGCCTACAGCCAACTCCTC
ACTGACCTCAACTCTACGACACTTGTCACTCTGTTGACAGCCAACGGCCTCTGGGCTAATCCAACTTTGCCGGTCTTAC
AGGACTACAAGAACAGCGTGGCCAGTAAATACTTCTCTATAGTCGATATCCTGCAGTTCACAAAAGCCGGCGGCCCAGA
AGGCCCGATCAACGCTTACATTGCCCAAAAAACTCAGAACAAGATAACAGACGTGCTTGGGGTCAGGGACGTCAAGCCG
GGGACCTCCACCGTCCTGGTCAATGCCCTGTTTTTCAACGGCACCTGGAAGTCCCAGTTTGACGCCGGCAACACCAAGA
CGGGAAGTTTCCAGAAAGACGAGCGCATTTACCTCCAAGTGGACTTCATGAATCAGGTCGGGACCTTTGACCTCAAGCC
GGCGGCCGTCGAGAACGTTGACGTCATTAGGCTTCCGTTCCTGGACGAGAGATTCGCCTTGTACGTCGCGCTGCCAAAA
GCGCCATCAAATTTAGTGGATTTTGAGAACCAGCTCGTCGGGGATGACTTTGACCTCAACGTTTTGTTCACGGGCTTGA
AGAGCACGAAGGTTAACCTTACGCTCCCGAAGTGGAAACTCACGGCTAAGCTGAAGCTGAACAAGGCTTTGATCGATCT
GGGCATGCCCGAAATCTTCACGCAGGCGGCCAACTTTTCGGGAATTTCCGGTCTACCCATCTCGTTCACGCAGATTCTG
CAGAAGGCGGCGATAGAGGTCACAGAGACTGGAACAGTAGCCTCGGCCGCCACCGTTGTTGTACTTGCCAACATAATCA
GACCATCGCCAAGGGAACCAACGGTTGATTTCAAGGCCGACCACCCTTTTATTTATTTCCTGAGGGATGATCTGACTGG
CCTTATACTGTTTCAAGGGAAACAGGCGGACCCCACGGTCAGTCAGTTTAGCGCGGATGAATTAAGTTAAATTCAAATA
AAATTATAAAAGTTTTGTTCGGTG
>00304 10 reads, 966 bases
GTAAAAACATCAAAGTCTAAAGCTCKWGAATTAAATTAAACAAAAATTGGGGGTTGCACTTCATAAAACTTGTAGAAAT
AATTTATTTAACAAAGTCATTGTCATGGATGTCACCAAACTTGACATTTCTTACTAGGATTCATTGCGGTATCGGGCTG
GCAACCAAAGGACAGGGCAAACTCTCTGCTGTTGGCTACAGGCTCGTTGACTCCGTAGACGCCCTGATTGTTCCGTGTC
AACGTGTCATAGGTGTAGCTGTAGGCAGACCTTTGATATAAACACTTGGTTTGACTGTAGGCCAGAAAGAACAACTTGT
CTCCACTGATGTCCAAACCGGCAAGGCTCGTTTCTTGGACATCTCCTGCAGCCTTGTAAGCCCTGTACCCCAACAGTAA
CCCAAGGCTCTCGCTGAGGCTTTCGTCCAGCATTCCTTGACCGTTAGGCTCCATTTCTTTCTTTGAGAACAATTCATTA
TACTGGTCCACAAAGCAACTCGACTTTGCTCCTAACGTTTCTGTGACAGCACAGCTGCAAATGTTCTTCATGTTTCCCA
CTGCATCGTACTTGAGGCCGATTGTGGAGAAACCGTGGGCAAGTTCGTGCCCGGCAGTAGCAGCCACATAGCCGTAGAA
GTAAGCCTTGGGAAAGTCCTGTGAGAACATAAATGTGCGCAGTGTGGCAGCTGGCAAGAACACGGAGTTCTCCATTAAA
CTGTAGTAAGGAGTTGATCCGTCTGGCCTATGTTCCCATCTTTCGAATGGCTCGGGAATTGTCTTTCCTTCGCGTACTC
TCTCGGAGCGCTGAAAGTTGAGCAAATTATTCAAGAAATTTCCTTCCTCCATGACAATATCCTCGTATCTCTTGTCCAG
CTTTGTGACGTCGAGAATCTCTTCCGGGTAGGCAGCGTGCAAGGTCAAGGTCTCAGCCTTTCCTGTCATGGCTGCTCTA
GTGACGTCATCGAGCCAC
>00305 2 reads, 995 bases
ATGTACTTTAACTACTTTTGTTGTACAGCATATGATGGATTATGAATGAAAAAGGGGGAAATTATATTTAGATGAGATT
TGTACATTCCTGAATCATGGATTAGTCACTTTCATCATCCACACTAGASMCWAGTTTTTTCCTTTTCTTTGTTTGCGGT
TTGATTTCATCATCTGATGTGTCACTTCCACTGTCACTCTCTGCTGATTTTTTGCTTTTTGAATATTTGGGACTCAAGC
CACTGGCATTTGATGCTTTTCTCCCCCTCAAAACACGAACTGTTTTCAACTCATCAATATCTTCAGCTAATGCAAGTAG
ATCACTATATTTGGTTTTCTGAGCTTCACTTGCTGTTATCTGAACTTGTTGAAGGGCATGCTGAACATTTTCATGGTTC
AAAAATGAAATGTTTCTGCAGACCTGCCGCATATGATCTAGATGTGCAAGGATTTGGTCCACAGTGGGATGGTCCTTCT
TTGTGCCACCAGCCCTTTGTCTTTTCTTAGGAGTTCCATTAAGTTTTGTCAACTGGAGGTTGATGAGCTCTGCTAATCT
GTCTTGGTGTTCTTGGGCCCAGTATTTAAGTATTGATACAGTGAAGTAGTCAGTCTTCTTACATTCCCTTGACAGGACT
GGCCGTAAGATATCCCAGCTAGGACTGACTTGCTTCAGAAGTACCATAAGGCTGGTTAGTGCTTCAGCATTTGCAGTGT
ATTCCAGTTTTGGAAGGATGGGTAGAATGTGTTCCACTGGGATGTTGTGTGCCATCACAAGCTGCCATAGAAAGTACTG
CTCTATTGTTTCCCAGTCCAGACTGGCATTGAGAATTGATAAAAATGTTTCTTTTTTGAACATCAACATATGACCTTGT
AAAATTTGACAAATCAAATCCTGAAGCTGTGATCCATCTATACTTGAAACAATCAAATTTAAAATGGTTGCATTGCCAA
CAGCAATGTTTGGAAAATGTGTATATATGTCTGGAATAAGATTACCC
>00306 8 reads, 1113 bases
ATTTTACCGACTTAATGATAATCTGAGTTTCATAAGGGTATGGGTCTTTTTGCCCATTGTTTTAATTACATTCCTGATT
GGTATTTTAAGACACTACGTAACAATTTTATTATCTACTGATAAAAAGTCAGAACTAAGACAGGTATCAGACAGTCATG
CATTGATACGCAGTCGCATTTTACGGGAAAATGGGAAGTATATTCCCAAGCAGTCATTTTTAGTGAGGAAAAGTTTTTT
CAATAATGAAGAACGGGGATTTTTCAAAGTGGAAAAGAGGGAAACACAGGCAAAAAATCCAATGACAGATCCATCTATG
ATGACTGATATGGTGAAAGGGAATATAACCAATGTATTACCTATGATAATCATAGGTGGCTGGATCAACTGGGCATTCT
CAGGATTTCTAACAACCAAAGTGCCATTTCCGTTAACCTTCCGCTTCAAGCCAATGTTGCAGAGAGGAGTGGAGCTTAT
CACCTTAGATGCATCATGGGTCAGCTCAGCATCCTGGTATTTCCTCAATGTGTTTGGATTGCGTAGCATGTATACTCTT
ATATTGGGTCAAGATAATGCTGCTGATCAAACTAAAGCAATGCAAGACCAGATGTCAGGGTCTGCAATGATGGCACCTC
CTGATCCAATGAAAGCTTTCAAAGCTGAGTGGGAGGCTCTAGAGGTAGCACAGCATGAATGGATGCTAGAGGGAGTGGA
GGAGGAGCTGACAGGGGGCATTATCCAACCAGAGACAATCTATTTGAGATCTAAAAATTAAAGCATATTCTAATGTTTT
TTTATCACAGTCAAATTAAGTGTTGTTAATAATATTTGTTGCCCCTTTGCATTGTTGAGCAATCCACATTGTTTTTCTT
TATATAAGAATTTTGTATTTGAATGTGTGTATTTAAAAGAGAGGGTGAGGTTAAAAGTATTTTGTAATGGTCTTGTTGG
TTGTAATATGTGACAATATTTGGCATCTGGGCATTAGAAACAAAAGACAGTGGTCATATTCTTTGTGTGTAAATCTATC
TCTCAGCATGTATTTTATTTTTTCACCTTATTTATATAAAATAGATCACTCATTTTAAACAACACAAGTCAACGAGTGC
CAATTAA
>00307 2 reads, 769 bases
ACTGGGGTWTATWWTAAATTTAAGAGCAATTAGTTTGGAAACAGTGCACTAAACATGGCCAAGAGTTATGACTTAACGA
ATGAAGAAGGAACCAAGGAGTATTTACGCGACATAGAGATAGAATACCAATATCAGTGCTTTGATCAGAAAGAACCTGA
TGGTTGCCATCGCCTTGCAGAATTCAGAGAAAGCATCAAGAACAACATTTCAGCTGCAATTCCATTATATAAAGATACA
TGTGACAACTATAATTACCCCAAGAGCTGTTTTAAATATGGCCAATGCATGGACTCAGGTGCTGGAACTAAGAATCAGG
CACCTGATTTGAAAGTTGCCTTGCAGTATTATGAGAAAAGTTGTGCCTTGGGATTTGGAAACGGATGCTTCAATGCTGC
ACAGATTCATTTACAAACAGGGGAGGACAAAATTAAAGTTTTGAAAGCCCTTCCACTACTTTCAAGAGCTTGTGATTTA
AAGTGTGGTGAAGGTTGTTTTTTCACTGGTGGATTGTATCTTTCAGGGAAGTTTGTGGAAAAGGACCTTGAAAAGGCTT
TTCAGTTTAATCAGAAAGGCTGCAATTTAGAACATGTTGGATGCTGCAGTAATCTTAGCTTGATGTATCAGCATGGTCA
CGGCACAGAGAAAAACAGAACACTTGCAGCTGAAATGAAGAAAAGAGCTTTACATTTTTCAACAGAAAATGTGAAAAAA
CAGMTCKGWTATAAAAGTGAATGAATGATAGTGAAAAACACAGATGTTTATTTTATAT
>00308 2 reads, 725 bases
ACCTTTCTTGTGGCTATGCCWGCAGTCRWYRTCTTTCATCTGCTGGTCTCCTTTCAACCGTTTCAAGCTCCTCGTAAAA
TTATAAGGTTTAAGCAACGAGTTCATAACCATTTCAAAGCTCTACAATGAGTGCGTGGGATGCTTACATTTCAAACATG
AAGAGCTCGGGCCTTCAAATCTGTGGCATTTATGGTCTTGAAGGTGGTCCATGGGCTCAGTCTCCTGAAATGAAGGCAT
CACAACAGGAAGTGGCTTCCATTGTTTCTGGGATTCAGTCGCAGAACTTTCCCAATGGTGTCCATATTGGAGGTGTTCG
ATACACTGTAATCCGTATTTTTCCAGACACCGTGACGGCAAAATGCAGGGGGGCTGCAAAGGAGGAAGAAAACTACCTG
CTTCATGCGGCTCTGGCCAAAACATGTGTCATTATTGGTGGAATGTGTGGCCCTGCAGAGCGAGACACCACTAAGCTTG
TAGAAGATATTAGAGATTACCTTGTTAAGAGTAACTACTGATGATGTCTGGGTGTCATATGCTGTTTATTACACTGTAA
TCTTTAATTTACTGTTAAAGCTGACAAATACTAAAGATTACTTAACACATTTACTTTATAAAAAGTCTTTTGAGATCGG
GGATCATTGGTATATTAGTCATTGCATTAAAAGGTAGATGTTACTATTACTGTATTGAAGAAAAAAAAGTTCACTTATA
TTGACTAAGAGGGT
>00309 5 reads, 1073 bases
ATCAGAGATGTCGTTTGAACACGGCAGTTGAGATCCAGTCAGGAGAAACCATGGCCTACTCTACTGTAGACAAGGGATA
CCCCAATACTGAGAGCTACAGGGTGTTTTTCAAGAATTCTGATGGAGTTCCYATRTCACCATTCCACGATATTCCACTT
TTGGCTGATGCCCAGAACAACATATTCAACATGGTTGTGGAGATCCCCAGATGGACTAATGCCAAAATGGAGATCAACA
AAGAAGAAAAGTTGAATCCAATCAAGCAGGATGTGAAGAATGGAAAATTGAGATTTGTTAAAAACGTCTTCCCTTACCA
TGGCTACTTATGGAACTATGGCGCCTTGCCACAGACGTTTGAGGATCCCTCTCACGTGACACCAGAGACTGGCACGAGG
GGAGATTCTGACCCAATTGACGTTTGTGAAATCGGCCACAAGGTTCACCCAAGGGGAGCAATTATTCAAGTAAAGATTC
TAGGAGTTATGTGCCTTATTGATGAAGGAGAGACAGATTGGAAAATCCTTGCTATTGATGTCACAGATCCGCTAGCTCC
CAAACTGAATGATGTTTCTGACGTAAAAATTCACTGTCCTGGTCTAATAAAGGCCACGTACGACTGGTTCACTAACTAC
AAAGTCCCAGACGGGAAACCTGTYAATCAATTTGCTTTCAACGGAGAAGCCAAGGGAAAGGATCATGCTTTGCAAGTGA
TTCAAGACTCTCACCAGCAGTGGAGAGACCTGATGAACTCTACCGGCAACTCTCCTATATCAAGATTCAACACTACTGT
TGCTAACAGCTCCCAGAATATTGATAGGTTGGCAGCACTGCAGATCGTTGATCGGGCTGCTGTGCAAGAGGTGAACCAA
GAAGTCAATATTTGGTACTACATTAAACCTGACCAGTAACTTATAGGACAAATACGCGGTGCTATTTCCGTCACTTGTA
ATTCAGTATCTCGGTGGACAAAGAGATGTGACAGCAGTAACAATTATGCAAGTKTGAGGCTGTAAGCTTTGCTTTATTA
ATTTTCTTATTATCAATTTGAAAATAAAATTTTAAAAATATTTAAA
>00310 3 reads, 1053 bases
ACCTGAGAAATCTAAAAAACCGSMKACWGTATTTGACTTTGCAATATCTGTATTCTTTTCACTGTCCTTCCTTTTTCTA
GTTGTGTTTTCTTCTTTTTTGGGCTTCGTTAGTGATGATGGGGTCAGAACAGCTGAGGTGGAGGCAGKTTTAGGGGTGG
ATGAGGACTTGGCTTCCTCAAAGACAGGCGGTGCTGGAGTCCTCTCTATTTCTACTTGTCCCACTATTACAAAATCCGT
ACCACTCTCTCGCAGCTCTGAATCCAAGCTCTCAAGTATGTTTTGGCGATCACCAGGGTCCCTTTTTGTGACCATTTGC
TGGAGCTCGTGAATGTTTTCAGGCCATGTTTCGTGAAAGTCTTCAACACTCTCTTGAACAAGTGGCTCTTCTGATTCCT
CCAGTATCTGCTCTGGTAATGTTACATCCATGATGACACCTTGTTTATGTGATACACTCTCAATGTCATCATCTCTTGT
GTTGTCACTCACCAGCAAGACATTTTTCTCATCTGCTTTGGGCGTCACAGGTGATGACGGTTTGGAATACTGATGCTCG
ATCAACACATGGTGAATGTTTTCAGGCTTCACAAAAGTTTCAGTTGAGTAAAGATCTTGCGGATACTGTGATTTTTGTG
CAGCTGGAGTTTCTGAATTCAATTTAATGTCAAGGCTGACCTCGTCCTTTTTCTGTTGATCATGGATAATGAGACCATC
GGGTTTGAAAAGGTCCATCATGGTCAGGTCGACAGGTGCTTCATGCTCAGGCTTGTGTTTTTGCTTGGGCTTGCCAAGG
GCAGTGGCTGGAATCAATGGAGGGGGCCCATCTGGATCAGCTGGCTTTTTCTTGTCATCATCATCAAGGCTTGTGGTCT
TCTTTGCTCTGATGCCAGATGAGCTGTCAGACCTTTTCACACCATCGCTCGATTTCTTCCTCTCACCTTTATTGGAATC
AGCTGACACGCTTCTGTCCCTCACCTGTTTCAATCCATCTGTGGATTTTTTGCGCTCGCCATCCACTGGTTTTTTCTTT
TCCACAACACCAACCTTCTTTTTCCC
>00311 2 reads, 899 bases
AAAAAAAAAACTATTAGTTSATGTTTTATTATTTACAACATACTCCTTTAAATAGTAGTCATCGAACTGTACACTTGAA
AATACATAATGATTAATTTTTTAATTTTTTTTTCAACTGTTACTGTTACCATCCATTTTTCTCTCCTTTGAATTCTTTT
TATTGTTAGCAACAGACTTAAAACCTTCCCTGCCAGTTCCTCTCTGCCTTTTAGGCCTTGATATTGCAGACTTTATATC
ATTTACTGCAGCCATTTTATCTTTTGAATTAACTTTTTTGACGTGCTGTACCTTGCCTGAAAATGTGACATCTGTGATA
CCAGGAGGTTGATAACTTGGATCACTTGTATCTAGGGGGTCTTTTGAAAGTAGAATAGATATTGCAGGTATATCAGTAT
TGACCTTTAATGTATCTAAGCCTTCCACAGTTGGTTCCCAAAAGTCCTCAACTCTAAGAAATCCAATTTGTGTGATCTG
ATGCAAGCCCTTGATTTTCCTTTTCATAATTTCAGCACATGAAATTGTTTTGTTAATTGCATTTCCAGTGCCATTCCAA
GTCAAACACCGAACATTATTATCTGCAAATGTTGACATAGCAAAGCCCATAATGTTGCGTATTTTACTTCCATTAGTTA
CTTTCATTTCCACAGCACCTTCCATAGTCAAACTTGGTGGGTCATACACTGTCCTTGACTCTCCTTTACTATAATTTTC
CATTCTACAAAGATGACTTGTAATTGACCATCTGAAACTCTCAATTACCAAGTAATAATTAGGAACATAAATTCACTAC
TATTAAACGTGCAGCGTGCATTTCCGTAGCCGTAGCCGTAGGATTCCAATAAGCGTCTTTGTTTTCGTTTCGGAGAAAG
AGGGGGTGATTACCCKAGATCGGAAGAGCG
>00312 5 reads, 1087 bases
TTTTTCTGACGGGGTCTCCGTTTCAATTTTTCTGCCCTGCACTTGATCTTTGACCCTCAGGATTTTTGTGAAAAATTGT
TCCGTCAGCTTGAGAAAACTACTGAAAGATTTGAAGTGAAACTGCTGATGATTGATTTGATTTCCCGCTTGATTGGTAT
TCACAAACTGATTCTTTTGAATTTCTATCCTTTCATGAAGCGATTTTTGCAACCACATCAAAGAGAGGTAACTCATTTG
CTGCTGTACCTTGCTCAAGGAAGTCATGAAATTGTTCCCCCTGATGCCATGGATGAGGTTCTAATGACCATTGCCAATA
ACTTTATAGCTGAGCGCAATTCTAGTGAGGTCATGGCTGTTGGTTTAAATGCTGTGCGTGAGATCTGCTCTCGGTGTCC
ACTGGCCATGTCTGAAGATCTACTTCGGGATCTGGTCCAATATAAACTACACAGAGACAAAGCTGTTATGATGGCAGCA
AAATCTTTAGTTCAACTGTTCAGAAAAACCAACCCAGAGCTTCTTCACAGGAGAGACAGGGGTCGACCAACAGAGGCCA
GACAGGAACTAAAAATTTTAAAATATGGTGAACTTGATGCTAAAACTCATGTACCTGGAGCAGAAGTGATTCCTGAAAA
GGAAGAGAAACAGAAAGAAGAAAGTGAAGCTCAAGAAGAGTGGGAGTCTTGTAGTGATGAAGATGACGACAGTGATGGG
GAATGGGTTGATGTTCATCATTCATCCGATGAAGAGACACCAGAGACTGAGAAGAAGGAGACACCTGCTGAGGCTGAAG
AGAAGCTAAGACTTGCTGAAGAGATTTCATCTACAAGAATTATGACCGATGATGATTTTAAAGTCATAAATGCTAAGCA
GGTTTCAAAGGACATCAAATCTGCATCAGCTGCCAGAGCTAAGAAGAGGAAGTTCCAAGAGTCATCTCAAGCAGAAAAC
AACTCTGACTTGCCCAGGCTGGGAGACATTGAGATGGTACACAAGAAGAAAGCTCATGACAAAGAATCCAGATTAGCAA
CGGTTGTGGCTGGRRGAGAGRGAGAGARAAAAAWTTGCACAATGGWCMACAAAAAAAAAA
>00313 4 reads, 1180 bases
CAGCTTTGTTTATATTTTTATTATATAAGAGTAATTTAGCWAATMGAWTATCTWTAATAAAAAAAGTCTAAGACGTATA
CCAGGAGCTGGTTAGACTTTGAGTTGAGTCTTCCATGTACCTCATGCCTCACAGGTATTCTTGTAATAACTCAATCTTT
CCTCCACCTTCCTGGCCAGACCGGCATCGACTCTGGCAAAGTTCTTGAGCACCTGCTCCTGTATGTTGGCGTGTGCTTT
CTTCAGTGACTCGGCAATGTTCCAGACCAGCACGTTTCTTCCTTCATCAGAGAGGACCGAGGAATAKAATACTTTGGCT
TKAATKAAATCTGAGTCCGTCTCTGAGAGGAATCTCTGAGCTTCAGTTTCTGGTATGAAGATGTTCGACTCCACGAGTC
CAGCTTTCTCCACGGGTCCATTAAAACTGTTGGGGTAGTAGTTGGGTGCGCCCTCTTGATTGTCCCCACTCATGAACCC
GTCACGCATGTAGTGTTTTATTTTGAGAGCTGGGTTCGTGTTGACCGATAGCTGCAGGTAATTGACCCCCAGACGGTAA
CGCTGGGCGTCAGGGTACGCAAACAGACGACCCTGCAGCAGTAGATCAGGACTGGGTTCTATGCCCGGGACAAGATGAG
CTGGAGAAAATGCCAGCTGCTCCACCTCAGAGAAATAATTTTTGGGGTTGCGATTCAGTGTCAGCTTCCCGACTGGTAT
GAGGGGAAACTCTTTCTGTGGCCAGACCTTTGTAGGATCGAAGGGATTGTACTTTGTAATGGAATAAGCGTCCTCCTCG
GACATAACCTGCATGTAAATCGTCCAGACGGGCAGCAGCTTGTCGCCGATGGCGTTGTAGAGGTCGTGTGTGGCGTTAT
CTGGGTCTGTGATCAGCTGCTTTTCGGCTTCCTCTGACGTCATATTTTTTACCCCTTGTGTTGTCTTGATGTGAAACTT
GCAGTAGAACACGTTGCCGTTCTTGTTGACCAGCTTGAAGGCGTGCACCCCGTAGCCGTGCATGTGACGGAAGTTCAAG
GGGATTCCCCTGGCAGAGAACAACATCAGCAGCATGTGGGTCGTCTCGGGGCGTAAAGACACGAAGTCCCAGAAGGCAT
CGGCGTCCTTGAGGTGAGTAACTGGGTTACGTTTCCATGCGTGCATTAAACTTGGGAACAGGGGCGGATCTCTG
>00314 4 reads, 1108 bases
ATTAAAGAGAAAGTACACCGACTTAACTTTCTTTTTTCTGTCTACTCCTTCCTCTTTCAACCAGCTCAGACTTCTCAGT
TTCTTTATTTAATTTCCTTTTTTTGCTTGGAGTCTTTATAGGTGATTTTTGTGGTAGTTCCATGTCTCCATCATCCTCA
TTATTGCTGTCTTCTTCTCCTATCCCTTTGATTTCTACTTCTTCTCTGTTGTTATCAGCTGCTGTCTCTACTCTTTTTG
ATTTCCTTTTCTTTTTACTCTTAAGTGCTAATTTTTCTCCTTTGTTCTCATGGCACTGAATCACAGCTGAATGATTGTA
AGCAGCAAGGCAAGTCAGTCTAACCCTTGCTTCATGAAATAAAACTAACTCAGAAGCCTCAAGACCCTCTTCCAGGTTG
ACTTTAAAAATGAAAATGTTTCCAACAGCAGTTCCAGCAACAACAAGCTTGTCTTCTTCTTTATTTACAACACAAACAC
TTCGAATACGACTATTAAAAGTTTTCTCCCCTGGCTTTGCACAATCTAATGACAGCACCTGCTTACCACTTAGAACATC
TAGAATGATTGCATTCCTATCATCACCACATACTACAATGAGATTACCCTTAATAAAACAAACAGAATTTATCCTCCAA
GCTAAAGGTATTTCTTTTATGATGGAGGTATCCTCAAGCGAGCAAACTTCAATCTTTCTTTGATACACCAAAATATAAT
GGTCACCGCTATTTGTAAATAAAACAGTCTGTGCCAATTCTTTTAGTCTTCTTTGAAATGCCAACTTCCCAGTGACTAG
GTCCCAAGTCAAAAAACTTTTGTCATTGCCAACAGAAAGCCCAAGTTTTCCACTTGGATGTACAGCAATAKAACTTACA
TGAGATTTATGCCCTTTTAGAGTRCGGAGCATTTCCCAGTTTTTAGTTTTCCACATGCAGATATTTCCATCTTCACTAG
CTGAAAACATGTGGCTTGTTCCATAAAATGTGAGGCAATTTACTGTTCCAGTGTGTTCAAAGAGCCCCCCAACATCCTT
[truncated: 24,898,725 more chars]
